# Supplementary material for: Mikan Genome Database (MiGD): integrated database of genome annotation, genomic diversity, and CAPS marker information for mandarin molecular breeding
Source: PubMed Central journal article supplement — Breed Sci. 2020 Mar 5;70(2):200–11. doi: 10.1270/jsbbs.19097 (PMC7272249; doi:10.1270/jsbbs.19097), 2020-03-05
Supplement: 70_200_s5.pdf [file 70_200_s5.pdf]

Supplemental Table 4. *C. sinensis* specific gene groups

| ID        | Num. in <i>C. clementina</i> | Num. in <i>C. sinensis</i> | Num. in <i>P. trifoliata</i> | Gene                                                                                | GO                                                                                                                                                                                                                                                                                                                | InterPro                                                                                                                                                                                                                    | Members in <i>C. clementina</i> | Members in <i>C. sinensis</i>                                                 | Members in <i>P. trifoliata</i> |
|-----------|------------------------------|----------------------------|------------------------------|-------------------------------------------------------------------------------------|-------------------------------------------------------------------------------------------------------------------------------------------------------------------------------------------------------------------------------------------------------------------------------------------------------------------|-----------------------------------------------------------------------------------------------------------------------------------------------------------------------------------------------------------------------------|---------------------------------|-------------------------------------------------------------------------------|---------------------------------|
| GF004913  | 0                            | 3                          | 0                            | Hypothetical protein (2); Putative DNA/RNA polymerases superfamily protein-like (1) | nucleic acid binding [GO:0003676 molecular_function] (1); DNA integration [GO:0015074 biological_process] (1)                                                                                                                                                                                                     | Ribonuclease-H-like domain [IPR012337] (1); Integrase, catalytic core [IPR015841] (1)                                                                                                                                       | -                               | C_sinensis_00925_mRNA_5.1C_sinensis_01628_mRNA_2.1C_sinensis_02433_mRNA_A_5.1 | -                               |
| GF0042479 | 0                            | 2                          | 0                            | NB-ABC domain-containing disease resistance protein (2)                             | ADP binding [GO:0043531 molecular_function] (2)                                                                                                                                                                                                                                                                   | NB-ABC [IPR021812] (2); P-loop containing nucleoside triphosphate hydrolase [IPR027417] (2)                                                                                                                                 | -                               | C_sinensis_00340_mRNA_24.1C_sinensis_00950_mRNA_3.1                           | -                               |
| GF0043265 | 0                            | 1                          | 0                            | Hypothetical protein (1)                                                            | ATPase activity, coupled to transmembrane movement of substances [GO:0042626 molecular_function] (1); ATP binding [GO:0005524] (1)                                                                                                                                                                                | -                                                                                                                                                                                                                           | -                               | C_sinensis_03147_mRNA_1.1                                                     | -                               |
| GF0043264 | 0                            | 1                          | 0                            | ABC transporter G family member 16 (1)                                              | ABC-2 type transporter [IPR015252] (1); integral component of membrane [GO:0016021 cellular_component] (1); transport [GO:0006810 biological_process] (1); isoenzyme [GO:0016020 cellular_component] (1)                                                                                                          | ABC-2 type transporter [IPR015252] (1); CDR ABC transporter [IPR019229] (1)                                                                                                                                                 | -                               | C_sinensis_03142_mRNA_2.1                                                     | -                               |
| GF0043263 | 0                            | 1                          | 0                            | Hypothetical protein (1)                                                            | -                                                                                                                                                                                                                                                                                                                 | -                                                                                                                                                                                                                           | -                               | C_sinensis_03142_mRNA_1.1                                                     | -                               |
| GF0043262 | 0                            | 1                          | 0                            | Hypothetical protein (1)                                                            | -                                                                                                                                                                                                                                                                                                                 | -                                                                                                                                                                                                                           | -                               | C_sinensis_03133_mRNA_1.1                                                     | -                               |
| GF0043261 | 0                            | 1                          | 0                            | Hypothetical protein (1)                                                            | -                                                                                                                                                                                                                                                                                                                 | -                                                                                                                                                                                                                           | -                               | C_sinensis_03134_mRNA_1.1                                                     | -                               |
| GF0043260 | 0                            | 1                          | 0                            | Ankyrin repeat protein (1)                                                          | -                                                                                                                                                                                                                                                                                                                 | PGS domain [IPR026961] (1); Ankyrin repeat-containing domain [IPR026883] (1)                                                                                                                                                | -                               | C_sinensis_03133_mRNA_1.1                                                     | -                               |
| GF0043259 | 0                            | 1                          | 0                            | Hypothetical protein (1)                                                            | -                                                                                                                                                                                                                                                                                                                 | -                                                                                                                                                                                                                           | -                               | C_sinensis_03132_mRNA_1.1                                                     | -                               |
| GF0043258 | 0                            | 1                          | 0                            | Hypothetical protein (1)                                                            | -                                                                                                                                                                                                                                                                                                                 | -                                                                                                                                                                                                                           | -                               | C_sinensis_03122_mRNA_1.1                                                     | -                               |
| GF0043257 | 0                            | 1                          | 0                            | DNA-directed RNA polymerase, alpha subunit (1)                                      | transcription, DNA-templated [GO:0006351 biological_process] (1); protein dimerization activity [GO:0046983 molecular_function] (1); DNA-directed RNA polymerase activity [GO:0003899 molecular_function] (1)                                                                                                     | DNA-directed RNA polymerase, RHP1-like dimerization domain [IPR009025] (1); DNA-directed RNA polymerase, insert domain [IPR011262] (1); DNA-directed RNA polymerase activity [IPR011263] (1)                                | -                               | C_sinensis_03120_mRNA_1.1                                                     | -                               |
| GF0043256 | 0                            | 1                          | 0                            | Hypothetical protein (1)                                                            | -                                                                                                                                                                                                                                                                                                                 | -                                                                                                                                                                                                                           | -                               | C_sinensis_03112_mRNA_1.1                                                     | -                               |
| GF0043255 | 0                            | 1                          | 0                            | Hypothetical protein (1)                                                            | -                                                                                                                                                                                                                                                                                                                 | -                                                                                                                                                                                                                           | -                               | C_sinensis_03110_mRNA_1.1                                                     | -                               |
| GF0043254 | 0                            | 1                          | 0                            | Mesocricus 3, putative isoform 2 (1)                                                | -                                                                                                                                                                                                                                                                                                                 | Caspase-like domain [IPR029030] (1)                                                                                                                                                                                         | -                               | C_sinensis_03108_mRNA_1.1                                                     | -                               |
| GF0043253 | 0                            | 1                          | 0                            | CDNA clone:002-110-H12, full insert sequence (1)                                    | nucleic acid binding [GO:0003676 molecular_function] (1)                                                                                                                                                                                                                                                          | Ribonuclease-H-like domain [IPR012337] (1)                                                                                                                                                                                  | -                               | C_sinensis_03106_mRNA_2.1                                                     | -                               |
| GF0043252 | 0                            | 1                          | 0                            | Hypothetical protein (1)                                                            | -                                                                                                                                                                                                                                                                                                                 | -                                                                                                                                                                                                                           | -                               | C_sinensis_03106_mRNA_1.1                                                     | -                               |
| GF0043251 | 0                            | 1                          | 0                            | Hypothetical protein (1)                                                            | intracellular [GO:0005622 cellular_component] (1); zinc ion binding [GO:0008270 molecular_function] (1)                                                                                                                                                                                                           | B-box-type zinc finger [IPR000315] (1)                                                                                                                                                                                      | -                               | C_sinensis_03104_mRNA_1.1                                                     | -                               |
| GF0043250 | 0                            | 1                          | 0                            | Hypothetical protein (1)                                                            | -                                                                                                                                                                                                                                                                                                                 | -                                                                                                                                                                                                                           | -                               | C_sinensis_03102_mRNA_2.1                                                     | -                               |
| GF0043249 | 0                            | 1                          | 0                            | Hypothetical protein (1)                                                            | -                                                                                                                                                                                                                                                                                                                 | -                                                                                                                                                                                                                           | -                               | C_sinensis_03102_mRNA_1.1                                                     | -                               |
| GF0043248 | 0                            | 1                          | 0                            | Sec14 cytosolic factor (1)                                                          | -                                                                                                                                                                                                                                                                                                                 | CRAL-TRIO lipid binding domain [IPR012511] (1); CRAL-TRIO, N-terminal domain [IPR010754] (1)                                                                                                                                | -                               | C_sinensis_03096_mRNA_1.1                                                     | -                               |
| GF0043247 | 0                            | 1                          | 0                            | Hypothetical protein (1)                                                            | -                                                                                                                                                                                                                                                                                                                 | -                                                                                                                                                                                                                           | -                               | C_sinensis_03093_mRNA_2.1                                                     | -                               |
| GF0043246 | 0                            | 1                          | 0                            | Hypothetical protein (1)                                                            | -                                                                                                                                                                                                                                                                                                                 | Bull-type lectin domain [IPR001480] (1)                                                                                                                                                                                     | -                               | C_sinensis_03092_mRNA_1.1                                                     | -                               |
| GF0043245 | 0                            | 1                          | 0                            | Hypothetical protein (1)                                                            | -                                                                                                                                                                                                                                                                                                                 | -                                                                                                                                                                                                                           | -                               | C_sinensis_03091_mRNA_1.1                                                     | -                               |
| GF0043244 | 0                            | 1                          | 0                            | LRR receptor-like kinase (1)                                                        | protein binding [GO:0005515 molecular_function] (1)                                                                                                                                                                                                                                                               | Leucine-rich repeat domain, L domain-like [IPR026757] (1); Leucine-rich repeat, typical subtype [IPR001591] (1); Leucine-rich repeat-containing N-terminal, plant-type [IPR013210] (1); Leucine-rich repeat [IPR016111] (1) | -                               | C_sinensis_03090_mRNA_1.1                                                     | -                               |
| GF0043243 | 0                            | 1                          | 0                            | Mutator-like transposase (1)                                                        | zinc ion binding [GO:0008270 molecular_function] (1)                                                                                                                                                                                                                                                              | Transposase, MuDR, plant [IPR004332] (1); MULE transposase domain [IPR018209] (1); Zinc finger, PMZ-type [IPR006564] (1); Zinc finger, SWIM-type [IPR007527] (1)                                                            | -                               | C_sinensis_03089_mRNA_2.1                                                     | -                               |
| GF0043242 | 0                            | 1                          | 0                            | Hypothetical protein (1)                                                            | -                                                                                                                                                                                                                                                                                                                 | -                                                                                                                                                                                                                           | -                               | C_sinensis_03088_mRNA_2.1                                                     | -                               |
| GF0043241 | 0                            | 1                          | 0                            | Hypothetical protein (1)                                                            | -                                                                                                                                                                                                                                                                                                                 | Viral movement protein [IPR028919] (1)                                                                                                                                                                                      | -                               | C_sinensis_03088_mRNA_1.1                                                     | -                               |
| GF0043240 | 0                            | 1                          | 0                            | Hypothetical protein (1)                                                            | -                                                                                                                                                                                                                                                                                                                 | -                                                                                                                                                                                                                           | -                               | C_sinensis_03086_mRNA_2.1                                                     | -                               |
| GF0043239 | 0                            | 1                          | 0                            | Hypothetical protein (1)                                                            | -                                                                                                                                                                                                                                                                                                                 | -                                                                                                                                                                                                                           | -                               | C_sinensis_03084_mRNA_1.1                                                     | -                               |
| GF0043238 | 0                            | 1                          | 0                            | Hypothetical protein (1)                                                            | -                                                                                                                                                                                                                                                                                                                 | -                                                                                                                                                                                                                           | -                               | C_sinensis_03082_mRNA_1.1                                                     | -                               |
| GF0043237 | 0                            | 1                          | 0                            | Hypothetical protein (1)                                                            | -                                                                                                                                                                                                                                                                                                                 | -                                                                                                                                                                                                                           | -                               | C_sinensis_03080_mRNA_1.1                                                     | -                               |
| GF0043236 | 0                            | 1                          | 0                            | Hypothetical protein (1)                                                            | carbohydrate metabolic process [GO:0005975 biological_process] (1)                                                                                                                                                                                                                                                | Glycoside hydrolase, catalytic domain [IPR013781] (1)                                                                                                                                                                       | -                               | C_sinensis_03074_mRNA_1.1                                                     | -                               |
| GF0043235 | 0                            | 1                          | 0                            | Hypothetical protein (1)                                                            | -                                                                                                                                                                                                                                                                                                                 | Alpha-beta hydrolase fold [IPR029058] (1)                                                                                                                                                                                   | -                               | C_sinensis_03069_mRNA_1.1                                                     | -                               |
| GF0043234 | 0                            | 1                          | 0                            | Hypothetical protein (1)                                                            | -                                                                                                                                                                                                                                                                                                                 | -                                                                                                                                                                                                                           | -                               | C_sinensis_03067_mRNA_2.1                                                     | -                               |
| GF0043233 | 0                            | 1                          | 0                            | Disease resistance-responsive, divergent domain protein (1)                         | -                                                                                                                                                                                                                                                                                                                 | Plant disease resistance response protein [IPR004265] (1)                                                                                                                                                                   | -                               | C_sinensis_03063_mRNA_1.1                                                     | -                               |
| GF0043232 | 0                            | 1                          | 0                            | C globular stage, putative (1)                                                      | -                                                                                                                                                                                                                                                                                                                 | Amino transferase-like, plant mobile domain [IPR019557] (1); Protein of unknown function DUF716 (TMEH45) [IPR006904] (1)                                                                                                    | -                               | C_sinensis_03061_mRNA_2.1                                                     | -                               |
| GF0043231 | 0                            | 1                          | 0                            | Hypothetical protein (1)                                                            | -                                                                                                                                                                                                                                                                                                                 | -                                                                                                                                                                                                                           | -                               | C_sinensis_03059_mRNA_2.1                                                     | -                               |
| GF0043230 | 0                            | 1                          | 0                            | Hypothetical protein (1)                                                            | -                                                                                                                                                                                                                                                                                                                 | -                                                                                                                                                                                                                           | -                               | C_sinensis_03059_mRNA_1.1                                                     | -                               |
| GF0043229 | 0                            | 1                          | 0                            | Hypothetical protein (1)                                                            | -                                                                                                                                                                                                                                                                                                                 | -                                                                                                                                                                                                                           | -                               | C_sinensis_03058_mRNA_2.1                                                     | -                               |
| GF0043228 | 0                            | 1                          | 0                            | Hypothetical protein (1)                                                            | -                                                                                                                                                                                                                                                                                                                 | -                                                                                                                                                                                                                           | -                               | C_sinensis_03057_mRNA_2.1                                                     | -                               |
| GF0043227 | 0                            | 1                          | 0                            | Probably inactive leucine-rich repeat receptor-like protein kinase (1)              | -                                                                                                                                                                                                                                                                                                                 | Leucine-rich repeat domain, L domain-like [IPR026757] (1)                                                                                                                                                                   | -                               | C_sinensis_03051_mRNA_1.1                                                     | -                               |
| GF0043226 | 0                            | 1                          | 0                            | Hypothetical protein (1)                                                            | -                                                                                                                                                                                                                                                                                                                 | Retroviral aspartyl protease [IPR013242] (1)                                                                                                                                                                                | -                               | C_sinensis_03050_mRNA_2.1                                                     | -                               |
| GF0043225 | 0                            | 1                          | 0                            | Hypothetical protein (1)                                                            | nucleic acid binding [GO:0003676 molecular_function] (1); nucleoside binding [GO:0000166 molecular_function] (1)                                                                                                                                                                                                  | Nucleoside-binding alpha-beta pair domain [IPR012077] (1); RNA recognition motif domain [IPR000504] (1)                                                                                                                     | -                               | C_sinensis_03047_mRNA_2.1                                                     | -                               |
| GF0043224 | 0                            | 1                          | 0                            | COBW domain-containing protein 1 (1)                                                | -                                                                                                                                                                                                                                                                                                                 | CoSW/HyB/UvG domain [IPR000495] (1); P-loop containing nucleoside triphosphate hydrolase [IPR027417] (1)                                                                                                                    | -                               | C_sinensis_03046_mRNA_1.1                                                     | -                               |
| GF0043223 | 0                            | 1                          | 0                            | Hypothetical protein (1)                                                            | -                                                                                                                                                                                                                                                                                                                 | P-loop containing nucleoside triphosphate hydrolase [IPR027417] (1)                                                                                                                                                         | -                               | C_sinensis_03045_mRNA_1.1                                                     | -                               |
| GF0043222 | 0                            | 1                          | 0                            | Hypothetical protein (1)                                                            | -                                                                                                                                                                                                                                                                                                                 | Domain of unknown function DUF1585 [IPR015410] (1)                                                                                                                                                                          | -                               | C_sinensis_03042_mRNA_1.1                                                     | -                               |
| GF0043221 | 0                            | 1                          | 0                            | Hypothetical protein (1)                                                            | -                                                                                                                                                                                                                                                                                                                 | Leucine-rich repeat-containing N-terminal, plant-type [IPR013210] (1); Leucine-rich repeat domain, L domain-like [IPR026757] (1)                                                                                            | -                               | C_sinensis_03039_mRNA_1.1                                                     | -                               |
| GF0043220 | 0                            | 1                          | 0                            | Hypothetical protein (1)                                                            | -                                                                                                                                                                                                                                                                                                                 | Reverse transcriptase zinc-binding domain [IPR026960] (1)                                                                                                                                                                   | -                               | C_sinensis_03038_mRNA_1.1                                                     | -                               |
| GF0043219 | 0                            | 1                          | 0                            | Ankyrin repeat family protein (1)                                                   | protein binding [GO:0005515 molecular_function] (1)                                                                                                                                                                                                                                                               | Ankyrin repeat-containing domain [IPR026083] (1); Ankyrin repeat [IPR002110] (1)                                                                                                                                            | -                               | C_sinensis_03034_mRNA_3.1                                                     | -                               |
| GF0043218 | 0                            | 1                          | 0                            | Hypothetical protein (1)                                                            | -                                                                                                                                                                                                                                                                                                                 | -                                                                                                                                                                                                                           | -                               | C_sinensis_03034_mRNA_1.1                                                     | -                               |
| GF0043217 | 0                            | 1                          | 0                            | Hypothetical protein (1)                                                            | -                                                                                                                                                                                                                                                                                                                 | -                                                                                                                                                                                                                           | -                               | C_sinensis_03033_mRNA_2.1                                                     | -                               |
| GF0043216 | 0                            | 1                          | 0                            | Polygalacturonase (1)                                                               | carbohydrate metabolic process [GO:0005975 biological_process] (1); polygalacturonase activity [GO:00004650 molecular_function] (1)                                                                                                                                                                               | Pectin lyase fold [IPR012334] (1); Pectin lyase 6kDa valence factor [IPR011050] (1); Glycoside hydrolase, family 28 [IPR000421] (1); Parallel beta-sheets repeat [IPR006626] (1)                                            | -                               | C_sinensis_03033_mRNA_1.1                                                     | -                               |
| GF0043215 | 0                            | 1                          | 0                            | Hypothetical protein (1)                                                            | -                                                                                                                                                                                                                                                                                                                 | Acidhalpin retrotransposon Orf1 [IPR004312] (1)                                                                                                                                                                             | -                               | C_sinensis_03031_mRNA_1.1                                                     | -                               |
| GF0043214 | 0                            | 1                          | 0                            | Hypothetical protein (1)                                                            | -                                                                                                                                                                                                                                                                                                                 | -                                                                                                                                                                                                                           | -                               | C_sinensis_03027_mRNA_2.1                                                     | -                               |
| GF0043213 | 0                            | 1                          | 0                            | Hypothetical protein (1)                                                            | -                                                                                                                                                                                                                                                                                                                 | Alpha-beta hydrolase fold [IPR029058] (1)                                                                                                                                                                                   | -                               | C_sinensis_03027_mRNA_1.1                                                     | -                               |
| GF0043212 | 0                            | 1                          | 0                            | Hypothetical protein (1)                                                            | protein binding [GO:0005515 molecular_function] (1)                                                                                                                                                                                                                                                               | WD40/VVTN repeat-like-containing domain [IPR015843] (1); WD40-repeat-containing domain [IPR017986] (1)                                                                                                                      | -                               | C_sinensis_03025_mRNA_2.1                                                     | -                               |
| GF0043211 | 0                            | 1                          | 0                            | Hypothetical protein (1)                                                            | -                                                                                                                                                                                                                                                                                                                 | -                                                                                                                                                                                                                           | -                               | C_sinensis_03022_mRNA_1.1                                                     | -                               |
| GF0043210 | 0                            | 1                          | 0                            | Defective in callin neddylation protein (1)                                         | -                                                                                                                                                                                                                                                                                                                 | Potentiating neddylation domain [IPR005176] (1); Defective-in-callin neddylation protein [IPR014764] (1)                                                                                                                    | -                               | C_sinensis_03019_mRNA_2.1                                                     | -                               |
| GF0043209 | 0                            | 1                          | 0                            | Misculin (1)                                                                        | endopeptidase inhibitor activity [GO:0004866 molecular_function] (1)                                                                                                                                                                                                                                              | Kentz inhibitor S11-like [IPR011065] (1); Proteinase inhibitor 15, Kentz-lygure [IPR021160] (1)                                                                                                                             | -                               | C_sinensis_03016_mRNA_1.1                                                     | -                               |
| GF0043208 | 0                            | 1                          | 0                            | Hypothetical protein (1)                                                            | -                                                                                                                                                                                                                                                                                                                 | LOG family [IPR031100] (1)                                                                                                                                                                                                  | -                               | C_sinensis_03012_mRNA_3.1                                                     | -                               |
| GF0043207 | 0                            | 1                          | 0                            | Putative GMP synthase (glutamine-hydrolyzing) (1)                                   | DNA-3-methyladenine glycosylase activity [GO:0008725 molecular_function] (1); catalytic activity [GO:000324 molecular_function] (1); DNA repair [GO:0006281 biological_process] (1); base-excision repair [GO:000624 biological_process] (1)                                                                      | Methyladenine glycosylase [IPR005019] (1); DNA glycosylase [IPR011257] (1)                                                                                                                                                  | -                               | C_sinensis_03011_mRNA_2.1                                                     | -                               |
| GF0043206 | 0                            | 1                          | 0                            | Hypothetical protein (1)                                                            | -                                                                                                                                                                                                                                                                                                                 | -                                                                                                                                                                                                                           | -                               | C_sinensis_03005_mRNA_4.1                                                     | -                               |
| GF0043205 | 0                            | 1                          | 0                            | Hypothetical protein (1)                                                            | -                                                                                                                                                                                                                                                                                                                 | -                                                                                                                                                                                                                           | -                               | C_sinensis_03005_mRNA_1.1                                                     | -                               |
| GF0043204 | 0                            | 1                          | 0                            | Hypothetical protein (1)                                                            | -                                                                                                                                                                                                                                                                                                                 | -                                                                                                                                                                                                                           | -                               | C_sinensis_03004_mRNA_1.1                                                     | -                               |
| GF0043203 | 0                            | 1                          | 0                            | Hypothetical protein (1)                                                            | protein binding [GO:0005515 molecular_function] (1)                                                                                                                                                                                                                                                               | Leucine-rich repeat domain, L domain-like [IPR026757] (1); Leucine-rich repeat [IPR016111] (1)                                                                                                                              | -                               | C_sinensis_03003_mRNA_1.1                                                     | -                               |
| GF0043202 | 0                            | 1                          | 0                            | Hypothetical protein (1)                                                            | -                                                                                                                                                                                                                                                                                                                 | Major facilitator superfamily domain [IPR025846] (1)                                                                                                                                                                        | -                               | C_sinensis_03000_mRNA_1.1                                                     | -                               |
| GF0043201 | 0                            | 1                          | 0                            | Hypothetical protein (1)                                                            | -                                                                                                                                                                                                                                                                                                                 | Rab-GTPase-TBC domain [IPR000195] (1)                                                                                                                                                                                       | -                               | C_sinensis_02998_mRNA_1.1                                                     | -                               |
| GF0043200 | 0                            | 1                          | 0                            | Hypothetical protein (1)                                                            | -                                                                                                                                                                                                                                                                                                                 | -                                                                                                                                                                                                                           | -                               | C_sinensis_02996_mRNA_1.1                                                     | -                               |
| GF0043199 | 0                            | 1                          | 0                            | Hypothetical protein (1)                                                            | zinc ion binding [GO:0008270 molecular_function] (1)                                                                                                                                                                                                                                                              | Zinc finger, SWIM-type [IPR007527] (1); Transposase, MuDR, plant [IPR004332] (1); Zinc finger, PMZ-type [IPR006564] (1)                                                                                                     | -                               | C_sinensis_02993_mRNA_1.1                                                     | -                               |
| GF0043198 | 0                            | 1                          | 0                            | Hypothetical protein (1)                                                            | -                                                                                                                                                                                                                                                                                                                 | -                                                                                                                                                                                                                           | -                               | C_sinensis_02991_mRNA_1.1                                                     | -                               |
| GF0043197 | 0                            | 1                          | 0                            | Hypothetical protein (1)                                                            | iron ion binding [GO:0005506 molecular_function] (1); heme binding [GO:000037 molecular_function] (1); oxidoreductase activity, acting on paired donors, with incorporation or reduction of molecular oxygen [GO:0016765 molecular_function] (1); oxidation-reduction process [GO:0005114 biological_process] (1) | Cytochrome P450 [IPR001120] (1); Cytochrome P450, conserved site [IPR017972] (1); Cytochrome P450, E-class, group 1 [IPR008240] (1)                                                                                         | -                               | C_sinensis_02988_mRNA_2.1                                                     | -                               |
| GF0043196 | 0                            | 1                          | 0                            | Hypothetical protein (1)                                                            | -                                                                                                                                                                                                                                                                                                                 | -                                                                                                                                                                                                                           | -                               | C_sinensis_02988_mRNA_1.1                                                     | -                               |

| ID        | Num. in <i>C. crotolariae</i> | Num. in <i>C. canalis</i> | Num. in <i>P. trifidata</i> | Note                                                                   | GO                                                                                                                                                                                                                                                                                                                                                                               | InterPro                                                                                                                                                                                                                                                                         | Members in <i>Crotolariae</i> | Members in <i>Canalis</i> | Members in <i>Trifidata</i> |
|-----------|-------------------------------|---------------------------|-----------------------------|------------------------------------------------------------------------|----------------------------------------------------------------------------------------------------------------------------------------------------------------------------------------------------------------------------------------------------------------------------------------------------------------------------------------------------------------------------------|----------------------------------------------------------------------------------------------------------------------------------------------------------------------------------------------------------------------------------------------------------------------------------|-------------------------------|---------------------------|-----------------------------|
| GF0043195 | 0                             | 1                         | 0                           | Hypothetical protein (1)                                               | transferase activity, transferring hexosyl groups [GO:0016758 molecular_function] (1); endoplasmic reticulum [GO:009785 cellular_component] (1); integral component of membrane [GO:0016021 cellular_component] (1)                                                                                                                                                              | Glycosyltransferase, ALG3 [IPR007873] (1)                                                                                                                                                                                                                                        | -                             | C_unihii_02985_mRNA_1.1   | -                           |
| GF0043194 | 0                             | 1                         | 0                           | SH3 domain protein (1)                                                 | cytoplasm [GO:0005737 cellular_component] (1); anaphase-onset assembly [GO:0006845 biological_process] (1)                                                                                                                                                                                                                                                                       | Ubiquitin-related domain [IPR029071] (1); Ubiquitin-like protein Atg12 [IPR007242] (4)                                                                                                                                                                                           | -                             | C_unihii_02984_mRNA_1.1   | -                           |
| GF0043193 | 0                             | 1                         | 0                           | 0 Ubiquitin-like protein ATG12 (1)                                     | cytoplasm [GO:0005737 cellular_component] (1); anaphase-onset assembly [GO:0006845 biological_process] (1)                                                                                                                                                                                                                                                                       | Ubiquitin-related domain [IPR029071] (1); Ubiquitin-like protein Atg12 [IPR007242] (4)                                                                                                                                                                                           | -                             | C_unihii_02983_mRNA_1.1   | -                           |
| GF0043192 | 0                             | 1                         | 0                           | Disease resistance protein (TR-NBS-LRR class) (1)                      | signal transduction [GO:0007165 biological_process] (1); protein binding [GO:0005515 molecular_function] (1)                                                                                                                                                                                                                                                                     | Toll/interleukin-1 receptor homology (TR) domain [IPR001571] (4)                                                                                                                                                                                                                 | -                             | C_unihii_02982_mRNA_1.1   | -                           |
| GF0043191 | 0                             | 1                         | 0                           | Hypothetical protein (1)                                               | biological process (1)                                                                                                                                                                                                                                                                                                                                                           | Protein tyrosine phosphatase-like [IPR029612] (1); Myosubstrin family [IPR030564] (1); Myosubstrin-like phosphatase domain [IPR010569] (1)                                                                                                                                       | -                             | C_unihii_02981_mRNA_2.1   | -                           |
| GF0043190 | 0                             | 1                         | 0                           | Hypothetical protein (1)                                               | group other than amino-acid groups                                                                                                                                                                                                                                                                                                                                               | -                                                                                                                                                                                                                                                                                | -                             | C_unihii_02979_mRNA_2.1   | -                           |
| GF0043189 | 0                             | 1                         | 0                           | Retinoid pigmentosa 1-like 1 protein, putative (1)                     | -                                                                                                                                                                                                                                                                                                                                                                                | -                                                                                                                                                                                                                                                                                | -                             | C_unihii_02977_mRNA_2.1   | -                           |
| GF0043188 | 0                             | 1                         | 0                           | Hypothetical protein (1)                                               | -                                                                                                                                                                                                                                                                                                                                                                                | Reverse transcriptase zinc-binding domain [IPR026960] (1)                                                                                                                                                                                                                        | -                             | C_unihii_02976_mRNA_3.1   | -                           |
| GF0043187 | 0                             | 1                         | 0                           | Hypothetical protein (1)                                               | transcription factor activity, sequence-specific DNA binding [GO:0003700 molecular_function] (1); regulation of transcription, DNA-templated [GO:0006355 biological_process] (1); sequence-specific DNA binding [GO:0043355 molecular_function] (1)                                                                                                                              | Basic-leucine zipper domain [IPR004827] (1)                                                                                                                                                                                                                                      | -                             | C_unihii_02975_mRNA_4.1   | -                           |
| GF0043186 | 0                             | 1                         | 0                           | Hypothetical protein (1)                                               | -                                                                                                                                                                                                                                                                                                                                                                                | -                                                                                                                                                                                                                                                                                | -                             | C_unihii_02975_mRNA_2.1   | -                           |
| GF0043185 | 0                             | 1                         | 0                           | Monosaccharide transport protein (1)                                   | -                                                                                                                                                                                                                                                                                                                                                                                | -                                                                                                                                                                                                                                                                                | -                             | C_unihii_02975_mRNA_1.1   | -                           |
| GF0043184 | 0                             | 1                         | 0                           | Fructokinase (1)                                                       | phosphotransferase activity, alcohol group as acceptor [GO:0016773 molecular_function] (1)                                                                                                                                                                                                                                                                                       | Carbohydrate kinase Pfkfb [IPR011611] (1); Carbohydrate kinase, Pfkfb, conserved site [IPR021731] (1); Ribokinase-like [IPR029056] (1)                                                                                                                                           | -                             | C_unihii_02973_mRNA_1.1   | -                           |
| GF0043183 | 0                             | 1                         | 0                           | Hypothetical protein (1)                                               | -                                                                                                                                                                                                                                                                                                                                                                                | -                                                                                                                                                                                                                                                                                | -                             | C_unihii_02968_mRNA_4.1   | -                           |
| GF0043182 | 0                             | 1                         | 0                           | Lipid transfer protein (1)                                             | lipid binding [GO:0082839 molecular_function] (1); lipid transport [GO:0006869 biological_process] (1)                                                                                                                                                                                                                                                                           | Plant lipid transfer protein/Par allergen [IPR005282] (1); Bifunctional amphiphilic lipid transfer protein/seed storage helical domain [IPR016140] (1)                                                                                                                           | -                             | C_unihii_02968_mRNA_2.1   | -                           |
| GF0043181 | 0                             | 1                         | 0                           | Hypothetical protein (1)                                               | -                                                                                                                                                                                                                                                                                                                                                                                | -                                                                                                                                                                                                                                                                                | -                             | C_unihii_02966_mRNA_3.1   | -                           |
| GF0043180 | 0                             | 1                         | 0                           | Hypothetical protein (1)                                               | -                                                                                                                                                                                                                                                                                                                                                                                | -                                                                                                                                                                                                                                                                                | -                             | C_unihii_02965_mRNA_3.1   | -                           |
| GF0043179 | 0                             | 1                         | 0                           | Hypothetical protein (1)                                               | -                                                                                                                                                                                                                                                                                                                                                                                | -                                                                                                                                                                                                                                                                                | -                             | C_unihii_02965_mRNA_2.1   | -                           |
| GF0043178 | 0                             | 1                         | 0                           | Hypothetical protein (1)                                               | transferase activity, transferring acyl groups other than amino-acid groups [GO:0016747 molecular_function] (1)                                                                                                                                                                                                                                                                  | Chlorophenicol acetyltransferase-like domain [IPR023131] (1); Transferase [IPR003480] (1)                                                                                                                                                                                        | -                             | C_unihii_02961_mRNA_1.1   | -                           |
| GF0043177 | 0                             | 1                         | 0                           | Hypothetical protein (1)                                               | -                                                                                                                                                                                                                                                                                                                                                                                | -                                                                                                                                                                                                                                                                                | -                             | C_unihii_02960_mRNA_1.1   | -                           |
| GF0043176 | 0                             | 1                         | 0                           | Hypothetical protein (1)                                               | -                                                                                                                                                                                                                                                                                                                                                                                | -                                                                                                                                                                                                                                                                                | -                             | C_unihii_02958_mRNA_1.1   | -                           |
| GF0043175 | 0                             | 1                         | 0                           | Hypothetical protein (1)                                               | cellulose microfibril organization [GO:0010215 biological_process] (1); anchored component of membrane [GO:0031224 cellular_component] (1); cell growth [GO:0016049 biological_process] (1)                                                                                                                                                                                      | COBRA, plant [IPR006918] (1)                                                                                                                                                                                                                                                     | -                             | C_unihii_02955_mRNA_3.1   | -                           |
| GF0043174 | 0                             | 1                         | 0                           | Hypothetical protein (1)                                               | -                                                                                                                                                                                                                                                                                                                                                                                | -                                                                                                                                                                                                                                                                                | -                             | C_unihii_02955_mRNA_2.1   | -                           |
| GF0043173 | 0                             | 1                         | 0                           | Neutral alpha-glucosidase (1)                                          | hydrolase activity, hydrolyzing O-glycosyl compounds [GO:0004553 molecular_function] (1); carbohydrate metabolic process [GO:0005975 biological_process] (1)                                                                                                                                                                                                                     | Glycoside hydrolase family 31 [IPR003231]; Glycoside hydrolase superfamily [IPR017853] (1)                                                                                                                                                                                       | -                             | C_unihii_02954_mRNA_1.1   | -                           |
| GF0043172 | 0                             | 1                         | 0                           | Hypothetical protein (1)                                               | -                                                                                                                                                                                                                                                                                                                                                                                | -                                                                                                                                                                                                                                                                                | -                             | C_unihii_02950_mRNA_2.1   | -                           |
| GF0043171 | 0                             | 1                         | 0                           | Hypothetical protein (1)                                               | -                                                                                                                                                                                                                                                                                                                                                                                | -                                                                                                                                                                                                                                                                                | -                             | C_unihii_02949_mRNA_1.1   | -                           |
| GF0043170 | 0                             | 1                         | 0                           | Hypothetical protein (1)                                               | -                                                                                                                                                                                                                                                                                                                                                                                | -                                                                                                                                                                                                                                                                                | -                             | C_unihii_02947_mRNA_2.1   | -                           |
| GF0043169 | 0                             | 1                         | 0                           | Hypothetical protein (1)                                               | phosphoric ester hydrolase activity [GO:0042578 molecular_function] (1)                                                                                                                                                                                                                                                                                                          | SAC domain [IPR002013] (1)                                                                                                                                                                                                                                                       | -                             | C_unihii_02947_mRNA_1.1   | -                           |
| GF0043168 | 0                             | 1                         | 0                           | FATTY ACID BIOSYNTHESIS 1 family protein (1)                           | metabolic process [GO:0008152 biological_process] (1); catalytic activity [GO:0003824 molecular_function] (1)                                                                                                                                                                                                                                                                    | Beta-kenoacyl synthase, N-terminal [IPR014030] (1); Beta-kenoacyl synthase, active site [IPR018201] (1); Polksteride synthase, beta-kenoacyl synthase domain [IPR020841] (1); Thioase-like [IPR016098] (1)                                                                       | -                             | C_unihii_02944_mRNA_3.1   | -                           |
| GF0043167 | 0                             | 1                         | 0                           | Hypothetical protein (1)                                               | -                                                                                                                                                                                                                                                                                                                                                                                | -                                                                                                                                                                                                                                                                                | -                             | C_unihii_02942_mRNA_1.1   | -                           |
| GF0043166 | 0                             | 1                         | 0                           | Hypothetical protein (1)                                               | -                                                                                                                                                                                                                                                                                                                                                                                | -                                                                                                                                                                                                                                                                                | -                             | C_unihii_02940_mRNA_2.1   | -                           |
| GF0043165 | 0                             | 1                         | 0                           | Hypothetical protein (1)                                               | -                                                                                                                                                                                                                                                                                                                                                                                | Myl/SANT-like domain [IPR024752] (1)                                                                                                                                                                                                                                             | -                             | C_unihii_02940_mRNA_1.1   | -                           |
| GF0043164 | 0                             | 1                         | 0                           | Hypothetical protein (1)                                               | protein binding [GO:0005515 molecular_function] (1); integral component of membrane [GO:0016021 cellular_component] (1); ATP binding [GO:0005524 molecular_function] (1); protein phosphorylation [GO:0006468 biological_process] (1); protein serine/threonine kinase activity [GO:0004874 molecular_function] (1); protein kinase activity [GO:0004672 molecular_function] (1) | EGF-like domain [IPR000742] (1); Protein kinase domain [IPR000719] (1); Protein kinase-like domain [IPR011009] (1); EGF-like, conserved site [IPR013022] (1); Wall-associated receptor kinase [IPR013695] (1)                                                                    | -                             | C_unihii_02939_mRNA_1.1   | -                           |
| GF0043163 | 0                             | 1                         | 0                           | Hypothetical protein (1)                                               | -                                                                                                                                                                                                                                                                                                                                                                                | -                                                                                                                                                                                                                                                                                | -                             | C_unihii_02937_mRNA_3.1   | -                           |
| GF0043162 | 0                             | 1                         | 0                           | Hypothetical protein (1)                                               | histone binding [GO:0042393 molecular_function] (1)                                                                                                                                                                                                                                                                                                                              | SRA-YDG [IPR003105] (1); PUA-like domain [IPR015947] (1)                                                                                                                                                                                                                         | -                             | C_unihii_02937_mRNA_2.1   | -                           |
| GF0043161 | 0                             | 1                         | 0                           | Hypothetical protein (1)                                               | -                                                                                                                                                                                                                                                                                                                                                                                | Epigallocatechin gallate, DPHB domain [IPR011211] (1); Ripa-like double-pot beta-barrel domain [IPR009009] (1)                                                                                                                                                                   | -                             | C_unihii_02937_mRNA_1.1   | -                           |
| GF0043160 | 0                             | 1                         | 0                           | Carboxypeptidase (1)                                                   | proteolysis [GO:0006508 biological_process] (1); serine-type carboxypeptidase activity [GO:0004185 molecular_function] (1)                                                                                                                                                                                                                                                       | Peptidase S10, serine carboxypeptidase [IPR001663] (1); Serine carboxypeptidases, histidine active site [IPR031242] (1); Alpha Beta hydrolase fold [IPR029058] (1); Serine carboxypeptidase, serine active site [IPR013210] (1)                                                  | -                             | C_unihii_02935_mRNA_1.1   | -                           |
| GF0043159 | 0                             | 1                         | 0                           | Ankyrin repeat family protein, putative (1)                            | protein binding [GO:0005515 molecular_function] (1)                                                                                                                                                                                                                                                                                                                              | Ankyrin repeat [IPR002110] (1); Ankyrin repeat-containing domain [IPR020683] (1)                                                                                                                                                                                                 | -                             | C_unihii_02933_mRNA_1.1   | -                           |
| GF0043158 | 0                             | 1                         | 0                           | Hypothetical protein (1)                                               | protein binding [GO:0005515 molecular_function] (1)                                                                                                                                                                                                                                                                                                                              | F-box domain [IPR001810] (1)                                                                                                                                                                                                                                                     | -                             | C_unihii_02932_mRNA_2.1   | -                           |
| GF0043157 | 0                             | 1                         | 0                           | Protein phosphatase 1 regulatory subunit 7 (1)                         | protein binding [GO:0005515 molecular_function] (1)                                                                                                                                                                                                                                                                                                                              | Leucine-rich repeat [IPR016111] (1); Leucine-rich repeat domain, I. domain-like [IPR026757] (1)                                                                                                                                                                                  | -                             | C_unihii_02932_mRNA_1.1   | -                           |
| GF0043156 | 0                             | 1                         | 0                           | Hypothetical protein (1)                                               | -                                                                                                                                                                                                                                                                                                                                                                                | -                                                                                                                                                                                                                                                                                | -                             | C_unihii_02931_mRNA_1.1   | -                           |
| GF0043155 | 0                             | 1                         | 0                           | Hypothetical protein (1)                                               | nucleus [GO:0005634 cellular_component] (1); DNA binding [GO:0003677 molecular_function] (1); oxidoreductase activity, acting on single donors with incorporation of molecular oxygen; incorporation of two atoms of oxygen [GO:0016702 molecular_function] (1); oxidation-reduction process [GO:0005514 biological_process] (1)                                                 | Methyl-CpG DNA binding [IPR001739] (1); DNA-binding domain [IPR016177] (1)                                                                                                                                                                                                       | -                             | C_unihii_02930_mRNA_3.1   | -                           |
| GF0043154 | 0                             | 1                         | 0                           | CCD (1)                                                                | -                                                                                                                                                                                                                                                                                                                                                                                | Carotenoid oxygenase [IPR004294] (1)                                                                                                                                                                                                                                             | -                             | C_unihii_02929_mRNA_1.1   | -                           |
| GF0043153 | 0                             | 1                         | 0                           | Hypothetical protein (1)                                               | -                                                                                                                                                                                                                                                                                                                                                                                | -                                                                                                                                                                                                                                                                                | -                             | C_unihii_02924_mRNA_1.1   | -                           |
| GF0043152 | 0                             | 1                         | 0                           | Hypothetical protein (1)                                               | -                                                                                                                                                                                                                                                                                                                                                                                | -                                                                                                                                                                                                                                                                                | -                             | C_unihii_02923_mRNA_1.1   | -                           |
| GF0043151 | 0                             | 1                         | 0                           | Hypothetical protein (1)                                               | -                                                                                                                                                                                                                                                                                                                                                                                | -                                                                                                                                                                                                                                                                                | -                             | C_unihii_02922_mRNA_1.1   | -                           |
| GF0043150 | 0                             | 1                         | 0                           | Hypothetical protein (1)                                               | -                                                                                                                                                                                                                                                                                                                                                                                | -                                                                                                                                                                                                                                                                                | -                             | C_unihii_02921_mRNA_5.1   | -                           |
| GF0043149 | 0                             | 1                         | 0                           | Hypothetical protein (1)                                               | -                                                                                                                                                                                                                                                                                                                                                                                | -                                                                                                                                                                                                                                                                                | -                             | C_unihii_02921_mRNA_4.1   | -                           |
| GF0043148 | 0                             | 1                         | 0                           | Hypothetical protein (1)                                               | -                                                                                                                                                                                                                                                                                                                                                                                | -                                                                                                                                                                                                                                                                                | -                             | C_unihii_02921_mRNA_1.1   | -                           |
| GF0043147 | 0                             | 1                         | 0                           | Hypothetical protein (1)                                               | nucleic acid binding [GO:0003676 molecular_function] (1)                                                                                                                                                                                                                                                                                                                         | Ribonuclease H-like domain [IPR012337] (1)                                                                                                                                                                                                                                       | -                             | C_unihii_02917_mRNA_2.1   | -                           |
| GF0043146 | 0                             | 1                         | 0                           | Putative disease resistance protein RGA4 (1)                           | -                                                                                                                                                                                                                                                                                                                                                                                | Leucine-rich repeat domain, I. domain-like [IPR026757] (1)                                                                                                                                                                                                                       | -                             | C_unihii_02917_mRNA_1.1   | -                           |
| GF0043145 | 0                             | 1                         | 0                           | Hypothetical protein (1)                                               | -                                                                                                                                                                                                                                                                                                                                                                                | -                                                                                                                                                                                                                                                                                | -                             | C_unihii_02916_mRNA_1.1   | -                           |
| GF0043144 | 0                             | 1                         | 0                           | Hypothetical protein (1)                                               | -                                                                                                                                                                                                                                                                                                                                                                                | Gag-polyprotein of LTR copia-type [IPR029472] (1)                                                                                                                                                                                                                                | -                             | C_unihii_02914_mRNA_1.1   | -                           |
| GF0043143 | 0                             | 1                         | 0                           | Hypothetical protein (1)                                               | -                                                                                                                                                                                                                                                                                                                                                                                | Reverse transcriptase zinc-binding domain [IPR026960] (1)                                                                                                                                                                                                                        | -                             | C_unihii_02912_mRNA_1.1   | -                           |
| GF0043142 | 0                             | 1                         | 0                           | Hypothetical protein (1)                                               | -                                                                                                                                                                                                                                                                                                                                                                                | -                                                                                                                                                                                                                                                                                | -                             | C_unihii_02909_mRNA_1.1   | -                           |
| GF0043141 | 0                             | 1                         | 0                           | G-type lectin S-receptor-like serine/threonine-protein kinase RLK1 (1) | ATP binding [GO:0005524 molecular_function] (1); recognition of pollen [GO:0048544 biological_process] (1)                                                                                                                                                                                                                                                                       | PAN/Apple domain [IPR003691] (1); Bulb-type lectin domain [IPR001480] (1); S-lectin glycoprotein domain [IPR000888] (1); Protein kinase, ATP binding site [IPR017441] (1); Concavalin A-like lectin/glucanase domain [IPR013320] (1); Protein kinase-like domain [IPR011009] (1) | -                             | C_unihii_02905_mRNA_1.1   | -                           |
| GF0043140 | 0                             | 1                         | 0                           | Hypothetical protein (1)                                               | proteolysis [GO:0006508 biological_process] (1); nucleic acid binding [GO:0003676 molecular_function] (1); serine-type endopeptidase activity [GO:0004190 molecular_function] (1); zinc ion binding [GO:0008270 molecular_function] (1)                                                                                                                                          | Peptidase A2A, retrovirus, catalytic [IPR001995] (1); Zinc finger, CCHC-type - [IPR001878] (1)                                                                                                                                                                                   | -                             | C_unihii_02904_mRNA_1.1   | -                           |
| GF0043138 | 0                             | 1                         | 0                           | Hypothetical leucine rich repeat protein (1)                           | protein binding [GO:0005515 molecular_function] (1)                                                                                                                                                                                                                                                                                                                              | Leucine-rich repeat [IPR016111] (1); Leucine-rich repeat, typical subtype [IPR003919] (1); Leucine-rich repeat domain, I. domain-like [IPR026757] (1)                                                                                                                            | -                             | C_unihii_02903_mRNA_1.1   | -                           |
| GF0043137 | 0                             | 1                         | 0                           | Hypothetical protein (1)                                               | nucleus [GO:0005634 cellular_component] (1)                                                                                                                                                                                                                                                                                                                                      | YLP motif-containing protein 1 [IPR006141] (1)                                                                                                                                                                                                                                   | -                             | C_unihii_02902_mRNA_1.1   | -                           |
| GF0043136 | 0                             | 1                         | 0                           | Hypothetical protein (1)                                               | -                                                                                                                                                                                                                                                                                                                                                                                | -                                                                                                                                                                                                                                                                                | -                             | C_unihii_02900_mRNA_1.1   | -                           |
| GF0043135 | 0                             | 1                         | 0                           | Hypothetical protein (1)                                               | -                                                                                                                                                                                                                                                                                                                                                                                | -                                                                                                                                                                                                                                                                                | -                             | C_unihii_02899_mRNA_1.1   | -                           |
| GF0043134 | 0                             | 1                         | 0                           | Hypothetical protein (1)                                               | -                                                                                                                                                                                                                                                                                                                                                                                | -                                                                                                                                                                                                                                                                                | -                             | C_unihii_02897_mRNA_1.1   | -                           |
| GF0043133 | 0                             | 1                         | 0                           | Hypothetical protein (1)                                               | carbohydrate metabolic process [GO:0005975 biological_process] (1); phosphotransferase activity, alcohol group as acceptor [GO:0016773 molecular_function] (1)                                                                                                                                                                                                                   | Carbohydrate kinase, FGGY, N-terminal [IPR018484] (1); Carbohydrate kinase, FGGY, C-terminal [IPR018485] (1)                                                                                                                                                                     | -                             | C_unihii_02896_mRNA_2.1   | -                           |
| GF0043132 | 0                             | 1                         | 0                           | UPF0481 plant-like protein (1)                                         | -                                                                                                                                                                                                                                                                                                                                                                                | Protein of unknown function DUF247, plant [IPR004158] (1)                                                                                                                                                                                                                        | -                             | C_unihii_02894_mRNA_2.1   | -                           |

| ID        | Num. in C. crottenstei | Num. in C. auris | Num. in P. putida | Name                                                     | GO                                                                                                                                                                                                                                                                                           | InterPro                                                                                                                                                                                                                                                                                            | Members in C. crottenstei | Members in C. auris    | Members in P. putida |
|-----------|------------------------|------------------|-------------------|----------------------------------------------------------|----------------------------------------------------------------------------------------------------------------------------------------------------------------------------------------------------------------------------------------------------------------------------------------------|-----------------------------------------------------------------------------------------------------------------------------------------------------------------------------------------------------------------------------------------------------------------------------------------------------|---------------------------|------------------------|----------------------|
| GF004311  | 0                      | 1                | 0                 | Hypothetical protein (1)                                 | zinc ion binding [GO:0008270 molecular_function] (1); nucleic acid binding [GO:0003676 molecular_function] (1); extracellular region [GO:0005576 cellular_component] (1); growth factor activity [GO:0008083 molecular_function] (1); cell proliferation [GO:0008283 biological_process] (1) | Zinc finger, CCHC-type [IPRO01878] (1)                                                                                                                                                                                                                                                              | -                         | C_ushii_02890_mRNA_1.1 | -                    |
| GF004310  | 0                      | 1                | 0                 | Hypothetical protein (1)                                 | -                                                                                                                                                                                                                                                                                            | Phytoalkaline [IPRO09438] (1)                                                                                                                                                                                                                                                                       | -                         | C_ushii_02889_mRNA_4.1 | -                    |
| GF0043129 | 0                      | 1                | 0                 | Transcriptional activator DEMETER-like protein (1)       | 4 iron, 4 sulfur cluster binding [GO:0051539 molecular_function] (1)                                                                                                                                                                                                                         | Fadomelase III like, iron-sulfur cluster loop motif [IPRO03651] (1); Demeter, RRM-4 fold domain [IPRO28925] (1); Helicium-like, base-ejection DNA repair, C-terminal [IPRO23190] (1); Permeated single zf-CXXC unit [IPRO28242] (1)                                                                 | -                         | C_ushii_02889_mRNA_1.1 | -                    |
| GF0043128 | 0                      | 1                | 0                 | Hypothetical protein (1)                                 | -                                                                                                                                                                                                                                                                                            | -                                                                                                                                                                                                                                                                                                   | -                         | C_ushii_02887_mRNA_1.1 | -                    |
| GF0043127 | 0                      | 1                | 0                 | Wall-associated receptor kinase 2 (1)                    | polysaccharide binding [GO:0030247 molecular_function] (1)                                                                                                                                                                                                                                   | Wall-associated receptor kinase, galactosamin-binding domain [IPRO25287] (1)                                                                                                                                                                                                                        | -                         | C_ushii_02886_mRNA_2.1 | -                    |
| GF0043126 | 0                      | 1                | 0                 | Hypothetical protein (1)                                 | hydrolase activity [GO:0016787 molecular_function] (1)                                                                                                                                                                                                                                       | Survival protein Surf-like phosphatase/mucronase [IPRO28282] (1)                                                                                                                                                                                                                                    | -                         | C_ushii_02883_mRNA_1.1 | -                    |
| GF0043125 | 0                      | 1                | 0                 | Hypothetical protein (1)                                 | -                                                                                                                                                                                                                                                                                            | Glycosyl transferase, family 1 [IPRO01296] (1)                                                                                                                                                                                                                                                      | -                         | C_ushii_02881_mRNA_1.1 | -                    |
| GF0043124 | 0                      | 1                | 0                 | Hypothetical protein (1)                                 | nucleotide binding [GO:0000166 molecular_function] (1); integral component of membrane [GO:0016021 cellular_component] (1); metal ion binding [GO:0046872 molecular_function] (1)                                                                                                            | P-type ATPase, transmembrane domain [IPRO23299] (1); Carion-transporting P-type ATPase, C-terminal [IPRO06068] (1); P-type ATPase, cytoplasmic domain N [IPRO22299] (1); P-type ATPase [IPRO01971] (1); P-type ATPase phosphorylation site [IPRO18303] (1); P-type ATPase, A domain [IPRO08290] (1) | -                         | C_ushii_02879_mRNA_1.1 | -                    |
| GF0043123 | 0                      | 1                | 0                 | Hypothetical protein (1)                                 | -                                                                                                                                                                                                                                                                                            | -                                                                                                                                                                                                                                                                                                   | -                         | C_ushii_02877_mRNA_3.1 | -                    |
| GF0043122 | 0                      | 1                | 0                 | Hypothetical protein (1)                                 | -                                                                                                                                                                                                                                                                                            | -                                                                                                                                                                                                                                                                                                   | -                         | C_ushii_02877_mRNA_1.1 | -                    |
| GF0043121 | 0                      | 1                | 0                 | Hypothetical protein (1)                                 | -                                                                                                                                                                                                                                                                                            | -                                                                                                                                                                                                                                                                                                   | -                         | C_ushii_02875_mRNA_1.1 | -                    |
| GF0043120 | 0                      | 1                | 0                 | Hypothetical protein (1)                                 | ADP binding [GO:0043531 molecular_function] (1)                                                                                                                                                                                                                                              | NB-ARC [IPRO02182] (1); P-loop containing nucleoside triphosphate hydrolase [IPRO27417] (1)                                                                                                                                                                                                         | -                         | C_ushii_02873_mRNA_2.1 | -                    |
| GF0043119 | 0                      | 1                | 0                 | Putative mitochondrial chaperone BCS1-B (1)              | ATP binding [GO:0005524 molecular_function] (1)                                                                                                                                                                                                                                              | P-loop containing nucleoside triphosphate hydrolase [IPRO27417] (1); AAA-type ATPase, N-terminal domain [IPRO25753] (1); ATPase, AAA-type, core [IPRO03959] (1); AAA+ ATPase domain [IPRO03959] (1)                                                                                                 | -                         | C_ushii_02871_mRNA_1.1 | -                    |
| GF0043118 | 0                      | 1                | 0                 | Hypothetical protein (1)                                 | cysteine-type peptidase activity [GO:0005234 molecular_function] (1); proteolysis [GO:0006508 biological_process] (1)                                                                                                                                                                        | Upl1 protease family, C-terminal catalytic domain [IPRO03653] (1)                                                                                                                                                                                                                                   | -                         | C_ushii_02870_mRNA_1.1 | -                    |
| GF0043117 | 0                      | 1                | 0                 | Hypothetical protein (1)                                 | metabolic process [GO:0008152 biological_process] (1); catalytic activity [GO:0003824 molecular_function] (1)                                                                                                                                                                                | Alkaline phosphatase-like, alpha beta alpha [IPRO17849] (1); Alkaline phosphatase-like, core domain [IPRO17850] (1)                                                                                                                                                                                 | -                         | C_ushii_02869_mRNA_1.1 | -                    |
| GF0043116 | 0                      | 1                | 0                 | Hypothetical protein (1)                                 | -                                                                                                                                                                                                                                                                                            | -                                                                                                                                                                                                                                                                                                   | -                         | C_ushii_02868_mRNA_1.1 | -                    |
| GF0043115 | 0                      | 1                | 0                 | Hypothetical protein (1)                                 | -                                                                                                                                                                                                                                                                                            | -                                                                                                                                                                                                                                                                                                   | -                         | C_ushii_02867_mRNA_2.1 | -                    |
| GF0043114 | 0                      | 1                | 0                 | Hypothetical protein (1)                                 | -                                                                                                                                                                                                                                                                                            | -                                                                                                                                                                                                                                                                                                   | -                         | C_ushii_02867_mRNA_1.1 | -                    |
| GF0043113 | 0                      | 1                | 0                 | Putative class I peptide chain release factor-like (1)   | translation release factor activity [GO:0003747 molecular_function] (1); translational termination [GO:0006415 biological_process] (1)                                                                                                                                                       | Peptide chain release factor class I-like II [IPRO00352] (1); Double-stranded RNA-binding domain [IPRO14720] (1)                                                                                                                                                                                    | -                         | C_ushii_02866_mRNA_1.1 | -                    |
| GF0043112 | 0                      | 1                | 0                 | Hypothetical protein (1)                                 | -                                                                                                                                                                                                                                                                                            | -                                                                                                                                                                                                                                                                                                   | -                         | C_ushii_02865_mRNA_1.1 | -                    |
| GF0043111 | 0                      | 1                | 0                 | UPF0481 protein (1)                                      | -                                                                                                                                                                                                                                                                                            | Protein of unknown function DUF247, plant [IPRO04158] (1)                                                                                                                                                                                                                                           | -                         | C_ushii_02864_mRNA_1.1 | -                    |
| GF0043110 | 0                      | 1                | 0                 | Hypothetical protein (1)                                 | microtubule motor activity [GO:0003777 molecular_function] (1); microtubule-based movement [GO:0007016 biological_process] (1)                                                                                                                                                               | NPK1-activating kinesin-like protein, C-terminal [IPRO21881] (1); Kinesin-like protein [IPRO27640] (1)                                                                                                                                                                                              | -                         | C_ushii_02863_mRNA_4.1 | -                    |
| GF0043109 | 0                      | 1                | 0                 | Hypothetical protein (1)                                 | -                                                                                                                                                                                                                                                                                            | -                                                                                                                                                                                                                                                                                                   | -                         | C_ushii_02863_mRNA_3.1 | -                    |
| GF0043108 | 0                      | 1                | 0                 | Hypothetical protein (1)                                 | -                                                                                                                                                                                                                                                                                            | -                                                                                                                                                                                                                                                                                                   | -                         | C_ushii_02863_mRNA_1.1 | -                    |
| GF0043107 | 0                      | 1                | 0                 | Hypothetical protein (1)                                 | -                                                                                                                                                                                                                                                                                            | -                                                                                                                                                                                                                                                                                                   | -                         | C_ushii_02860_mRNA_2.1 | -                    |
| GF0043106 | 0                      | 1                | 0                 | Cytokinin riboside 5'-monophosphate phosphohydrolase (1) | -                                                                                                                                                                                                                                                                                            | -                                                                                                                                                                                                                                                                                                   | -                         | C_ushii_02860_mRNA_1.1 | -                    |
| GF0043105 | 0                      | 1                | 0                 | Hypothetical protein (1)                                 | -                                                                                                                                                                                                                                                                                            | -                                                                                                                                                                                                                                                                                                   | -                         | C_ushii_02858_mRNA_1.1 | -                    |
| GF0043104 | 0                      | 1                | 0                 | Hypothetical protein (1)                                 | -                                                                                                                                                                                                                                                                                            | -                                                                                                                                                                                                                                                                                                   | -                         | C_ushii_02857_mRNA_3.1 | -                    |
| GF0043103 | 0                      | 1                | 0                 | Miraculin (1)                                            | endopeptidase inhibitor activity [GO:0048866 molecular_function] (1)                                                                                                                                                                                                                         | Proteinase inhibitor I3, Kunitz legume [IPRO02160] (1); Kunitz inhibitor ST1-like [IPRO11063] (1)                                                                                                                                                                                                   | -                         | C_ushii_02855_mRNA_3.1 | -                    |
| GF0043102 | 0                      | 1                | 0                 | Hypothetical protein (1)                                 | -                                                                                                                                                                                                                                                                                            | -                                                                                                                                                                                                                                                                                                   | -                         | C_ushii_02855_mRNA_2.1 | -                    |
| GF0043101 | 0                      | 1                | 0                 | Hypothetical protein (1)                                 | -                                                                                                                                                                                                                                                                                            | -                                                                                                                                                                                                                                                                                                   | -                         | C_ushii_02855_mRNA_1.1 | -                    |
| GF0043100 | 0                      | 1                | 0                 | Hypothetical protein (1)                                 | -                                                                                                                                                                                                                                                                                            | -                                                                                                                                                                                                                                                                                                   | -                         | C_ushii_02854_mRNA_1.1 | -                    |
| GF0043099 | 0                      | 1                | 0                 | Hypothetical protein (1)                                 | -                                                                                                                                                                                                                                                                                            | EF-hand domain pair [IPRO11992] (1)                                                                                                                                                                                                                                                                 | -                         | C_ushii_02851_mRNA_1.1 | -                    |
| GF0043098 | 0                      | 1                | 0                 | Hypothetical protein (1)                                 | -                                                                                                                                                                                                                                                                                            | -                                                                                                                                                                                                                                                                                                   | -                         | C_ushii_02847_mRNA_1.1 | -                    |
| GF0043097 | 0                      | 1                | 0                 | pentatricopeptide repeat protein (1)                     | -                                                                                                                                                                                                                                                                                            | Pentatricopeptide repeat [IPRO02885] (1)                                                                                                                                                                                                                                                            | -                         | C_ushii_02846_mRNA_2.1 | -                    |
| GF0043096 | 0                      | 1                | 0                 | Hypothetical protein (1)                                 | -                                                                                                                                                                                                                                                                                            | -                                                                                                                                                                                                                                                                                                   | -                         | C_ushii_02841_mRNA_2.1 | -                    |
| GF0043095 | 0                      | 1                | 0                 | Disease resistance protein RPS2 (1)                      | ADP binding [GO:0043531 molecular_function] (1); protein binding [GO:0005515 molecular_function] (1)                                                                                                                                                                                         | Leucine-rich repeat domain, I domain-like [IPRO23575] (1); P-loop containing nucleoside triphosphate hydrolase [IPRO27417] (1); NB-ARC [IPRO02182] (1); Leucine-rich repeat [IPRO01611] (1)                                                                                                         | -                         | C_ushii_02840_mRNA_1.1 | -                    |
| GF0043094 | 0                      | 1                | 0                 | MFS transporter (1)                                      | molybdate ion transmembrane transporter activity [GO:0015098 molecular_function] (1); molybdate ion transport [GO:0015689 biological_process] (1); integral component of membrane [GO:0016021 cellular_component] (1)                                                                        | Molybdate-anion transporter [IPRO08599] (1); Major facilitator superfamily domain [IPRO20846] (1)                                                                                                                                                                                                   | -                         | C_ushii_02839_mRNA_1.1 | -                    |
| GF0043093 | 0                      | 1                | 0                 | Hypothetical protein (1)                                 | -                                                                                                                                                                                                                                                                                            | -                                                                                                                                                                                                                                                                                                   | -                         | C_ushii_02832_mRNA_3.1 | -                    |
| GF0043092 | 0                      | 1                | 0                 | Mitotic checkpoint protein, putative (1)                 | protein serine/threonine kinase activity [GO:0004674 molecular_function] (1); protein binding [GO:0005515 molecular_function] (1)                                                                                                                                                            | Protein kinase-like domain [IPRO11009] (1); S-locus receptor kinase, C-terminal [IPRO21820] (1); WD40/YVYF repeat-like-containing domain [IPRO19413] (1); WD40 repeat-containing domain [IPRO17960] (1)                                                                                             | -                         | C_ushii_02831_mRNA_1.1 | -                    |
| GF0043091 | 0                      | 1                | 0                 | Amphipromoting complex subunit 6 (1)                     | protein binding [GO:0005515 molecular_function] (1)                                                                                                                                                                                                                                          | Tetratricopeptide repeat 2 [IPRO13185] (1); Tetratricopeptide-like helical domain [IPRO11990] (1); Tetratricopeptide repeat-containing domain [IPRO13026] (1); Tetratricopeptide repeat [IPRO19734] (1)                                                                                             | -                         | C_ushii_02830_mRNA_2.1 | -                    |
| GF0043090 | 0                      | 1                | 0                 | Hypothetical protein (1)                                 | -                                                                                                                                                                                                                                                                                            | -                                                                                                                                                                                                                                                                                                   | -                         | C_ushii_02826_mRNA_2.1 | -                    |
| GF0043089 | 0                      | 1                | 0                 | Hypothetical protein (1)                                 | -                                                                                                                                                                                                                                                                                            | ER membrane protein complex subunit 10 [IPRO29615] (1)                                                                                                                                                                                                                                              | -                         | C_ushii_02826_mRNA_1.1 | -                    |
| GF0043088 | 0                      | 1                | 0                 | Hypothetical protein (1)                                 | -                                                                                                                                                                                                                                                                                            | Head2 domain [IPRO29699] (1)                                                                                                                                                                                                                                                                        | -                         | C_ushii_02825_mRNA_4.1 | -                    |
| GF0043087 | 0                      | 1                | 0                 | Hypothetical protein (1)                                 | -                                                                                                                                                                                                                                                                                            | -                                                                                                                                                                                                                                                                                                   | -                         | C_ushii_02825_mRNA_3.1 | -                    |
| GF0043086 | 0                      | 1                | 0                 | Hypothetical protein (1)                                 | -                                                                                                                                                                                                                                                                                            | -                                                                                                                                                                                                                                                                                                   | -                         | C_ushii_02825_mRNA_1.1 | -                    |
| GF0043085 | 0                      | 1                | 0                 | Hypothetical protein (1)                                 | -                                                                                                                                                                                                                                                                                            | -                                                                                                                                                                                                                                                                                                   | -                         | C_ushii_02824_mRNA_3.1 | -                    |
| GF0043084 | 0                      | 1                | 0                 | Hypothetical protein (1)                                 | -                                                                                                                                                                                                                                                                                            | -                                                                                                                                                                                                                                                                                                   | -                         | C_ushii_02823_mRNA_2.1 | -                    |
| GF0043083 | 0                      | 1                | 0                 | Hypothetical protein (1)                                 | -                                                                                                                                                                                                                                                                                            | -                                                                                                                                                                                                                                                                                                   | -                         | C_ushii_02821_mRNA_1.1 | -                    |
| GF0043082 | 0                      | 1                | 0                 | Hypothetical protein (1)                                 | -                                                                                                                                                                                                                                                                                            | -                                                                                                                                                                                                                                                                                                   | -                         | C_ushii_02820_mRNA_3.1 | -                    |
| GF0043081 | 0                      | 1                | 0                 | Hypothetical protein (1)                                 | -                                                                                                                                                                                                                                                                                            | -                                                                                                                                                                                                                                                                                                   | -                         | C_ushii_02818_mRNA_2.1 | -                    |
| GF0043080 | 0                      | 1                | 0                 | Hypothetical protein (1)                                 | -                                                                                                                                                                                                                                                                                            | -                                                                                                                                                                                                                                                                                                   | -                         | C_ushii_02818_mRNA_1.1 | -                    |
| GF0043079 | 0                      | 1                | 0                 | Cytokinin riboside 5'-monophosphate phosphohydrolase (1) | -                                                                                                                                                                                                                                                                                            | -                                                                                                                                                                                                                                                                                                   | -                         | C_ushii_02816_mRNA_1.1 | -                    |
| GF0043078 | 0                      | 1                | 0                 | Hypothetical protein (1)                                 | -                                                                                                                                                                                                                                                                                            | -                                                                                                                                                                                                                                                                                                   | -                         | C_ushii_02815_mRNA_3.1 | -                    |
| GF0043077 | 0                      | 1                | 0                 | Acetyltransferase (GNAT) domain protein (1)              | N-acetyltransferase activity [GO:0008080 molecular_function] (1)                                                                                                                                                                                                                             | Acyl-CoA N-acetyltransferase [IPRO16181] (1); GNAT domain [IPRO00182] (1)                                                                                                                                                                                                                           | -                         | C_ushii_02815_mRNA_1.1 | -                    |
| GF0043076 | 0                      | 1                | 0                 | Hypothetical protein (1)                                 | -                                                                                                                                                                                                                                                                                            | -                                                                                                                                                                                                                                                                                                   | -                         | C_ushii_02814_mRNA_1.1 | -                    |
| GF0043075 | 0                      | 1                | 0                 | Hypothetical protein (1)                                 | -                                                                                                                                                                                                                                                                                            | -                                                                                                                                                                                                                                                                                                   | -                         | C_ushii_02812_mRNA_2.1 | -                    |
| GF0043074 | 0                      | 1                | 0                 | Hypothetical protein (1)                                 | -                                                                                                                                                                                                                                                                                            | -                                                                                                                                                                                                                                                                                                   | -                         | C_ushii_02812_mRNA_1.1 | -                    |
| GF0043073 | 0                      | 1                | 0                 | Zinc knuckle family protein (1)                          | zinc ion binding [GO:0008270 molecular_function] (1); nucleic acid binding [GO:0003676 molecular_function] (1)                                                                                                                                                                               | Zinc finger, CCHC-type [IPRO01878] (1)                                                                                                                                                                                                                                                              | -                         | C_ushii_02811_mRNA_1.1 | -                    |
| GF0043072 | 0                      | 1                | 0                 | Hypothetical protein (1)                                 | zinc ion binding [GO:0008270 molecular_function] (1)                                                                                                                                                                                                                                         | Zinc finger, PAZ-type [IPRO06564] (1); Zinc finger, SWIM-type [IPRO07527] (1)                                                                                                                                                                                                                       | -                         | C_ushii_02810_mRNA_3.1 | -                    |
| GF0043071 | 0                      | 1                | 0                 | Hypothetical protein (1)                                 | -                                                                                                                                                                                                                                                                                            | -                                                                                                                                                                                                                                                                                                   | -                         | C_ushii_02810_mRNA_1.1 | -                    |
| GF0043070 | 0                      | 1                | 0                 | Hypothetical protein (1)                                 | -                                                                                                                                                                                                                                                                                            | Domain of unknown function DUF4283 [IPRO25558] (1)                                                                                                                                                                                                                                                  | -                         | C_ushii_02809_mRNA_3.1 | -                    |
| GF0043069 | 0                      | 1                | 0                 | Hypothetical protein (1)                                 | -                                                                                                                                                                                                                                                                                            | -                                                                                                                                                                                                                                                                                                   | -                         | C_ushii_02809_mRNA_2.1 | -                    |
| GF0043068 | 0                      | 1                | 0                 | Hypothetical protein (1)                                 | -                                                                                                                                                                                                                                                                                            | -                                                                                                                                                                                                                                                                                                   | -                         | C_ushii_02806_mRNA_1.1 | -                    |
| GF0043067 | 0                      | 1                | 0                 | Hypothetical protein (1)                                 | -                                                                                                                                                                                                                                                                                            | -                                                                                                                                                                                                                                                                                                   | -                         | C_ushii_02805_mRNA_1.1 | -                    |
| GF0043066 | 0                      | 1                | 0                 | Hypothetical protein (1)                                 | -                                                                                                                                                                                                                                                                                            | -                                                                                                                                                                                                                                                                                                   | -                         | C_ushii_02801_mRNA_2.1 | -                    |
| GF0043065 | 0                      | 1                | 0                 | Hypothetical protein (1)                                 | -                                                                                                                                                                                                                                                                                            | -                                                                                                                                                                                                                                                                                                   | -                         | C_ushii_02801_mRNA_1.1 | -                    |
| GF0043064 | 0                      | 1                | 0                 | Hypothetical protein (1)                                 | -                                                                                                                                                                                                                                                                                            | -                                                                                                                                                                                                                                                                                                   | -                         | C_ushii_02799_mRNA_3.1 | -                    |
| GF0043063 | 0                      | 1                | 0                 | Hypothetical protein (1)                                 | -                                                                                                                                                                                                                                                                                            | -                                                                                                                                                                                                                                                                                                   | -                         | C_ushii_02798_mRNA_2.1 | -                    |
| GF0043062 | 0                      | 1                | 0                 | Hypothetical protein (1)                                 | -                                                                                                                                                                                                                                                                                            | -                                                                                                                                                                                                                                                                                                   | -                         | C_ushii_02798_mRNA_1.1 | -                    |
| GF0043061 | 0                      | 1                | 0                 | Hypothetical protein (1)                                 | -                                                                                                                                                                                                                                                                                            | Agent-like domain [IPRO08395] (1)                                                                                                                                                                                                                                                                   | -                         | C_ushii_02797_mRNA_1.1 | -                    |
| GF0043060 | 0                      | 1                | 0                 | Hypothetical protein (1)                                 | calcium-dependent phospholipid binding [GO:0005544 molecular_function] (1); negative regulation of cell death [GO:0006548 biological_process] (1)                                                                                                                                            | Copine [IPRO10734] (1); Protein BONZAI [IPRO31116] (1)                                                                                                                                                                                                                                              | -                         | C_ushii_02796_mRNA_2.1 | -                    |
| GF0043059 | 0                      | 1                | 0                 | Disease resistance protein RPS2 (1)                      | -                                                                                                                                                                                                                                                                                            | Leucine-rich repeat domain, I domain-like [IPRO23575] (1)                                                                                                                                                                                                                                           | -                         | C_ushii_02796_mRNA_1.1 | -                    |
| GF0043058 | 0                      | 1                | 0                 | Hypothetical protein (1)                                 | -                                                                                                                                                                                                                                                                                            | -                                                                                                                                                                                                                                                                                                   | -                         | C_ushii_02794_mRNA_1.1 | -                    |
| GF0043057 | 0                      | 1                | 0                 | Hypothetical protein (1)                                 | -                                                                                                                                                                                                                                                                                            | -                                                                                                                                                                                                                                                                                                   | -                         | C_ushii_02790_mRNA_2.1 | -                    |
| GF0043056 | 0                      | 1                | 0                 | Hypothetical protein (1)                                 | -                                                                                                                                                                                                                                                                                            | -                                                                                                                                                                                                                                                                                                   | -                         | C_ushii_02793_mRNA_1.1 | -                    |
| GF0043055 | 0                      | 1                | 0                 | Hypothetical protein (1)                                 | proteolysis [GO:0006508 biological_process] (1); cysteine-type peptidase activity [GO:0008234 molecular_function] (1)                                                                                                                                                                        | Upl1 protease family, C-terminal catalytic domain [IPRO03653] (1)                                                                                                                                                                                                                                   | -                         | C_ushii_02792_mRNA_2.1 | -                    |
| GF0043054 | 0                      | 1                | 0                 | Hypothetical protein (1)                                 | -                                                                                                                                                                                                                                                                                            | -                                                                                                                                                                                                                                                                                                   | -                         | C_ushii_02792_mRNA_1.1 | -                    |
| GF0043053 | 0                      | 1                | 0                 | Hypothetical protein (1)                                 | -                                                                                                                                                                                                                                                                                            | -                                                                                                                                                                                                                                                                                                   | -                         | C_ushii_02791_mRNA_1.1 | -                    |

| ID        | Num. in <i>C. crotolariae</i> | Num. in <i>C. canalis</i> | Num. in <i>P. trifidata</i> | Note                                                                                     | GO                                                                                                                                                                                                                                                                                                                                                                                                                                                                                                                                                                                   | InterPro                                                                                                                                                                                                                                                                                                                                                                                                                                                                                    | Members in <i>Crotolariae</i> | Members in <i>Canalis</i> | Members in <i>Trifidata</i> |
|-----------|-------------------------------|---------------------------|-----------------------------|------------------------------------------------------------------------------------------|--------------------------------------------------------------------------------------------------------------------------------------------------------------------------------------------------------------------------------------------------------------------------------------------------------------------------------------------------------------------------------------------------------------------------------------------------------------------------------------------------------------------------------------------------------------------------------------|---------------------------------------------------------------------------------------------------------------------------------------------------------------------------------------------------------------------------------------------------------------------------------------------------------------------------------------------------------------------------------------------------------------------------------------------------------------------------------------------|-------------------------------|---------------------------|-----------------------------|
| GF0043052 | 0                             | 1                         | 1                           | 0 LRR receptor-like kinase family protein (1)                                            | protein kinase activity [GO:0004672 molecular_function] (1); protein phosphorylation [GO:0006468 biological_process] (1); ATP binding [GO:0005242 molecular_function] (1); protein tyrosine kinase activity [GO:0004713 molecular_function] (1); protein binding [GO:0005515 molecular_function] (1)                                                                                                                                                                                                                                                                                 | Leucine-rich repeat domain, L domain-like [IPR013075] (1); Protein kinase-like domain [IPR010091] (1); Leucine-rich repeat, typical subtype [IPR003591] (1); Tyrosine-protein kinase, catalytic domain [IPR020635] (1); Concavallin A-like lectin/glucanase domain [IPR013320] (1); Protein kinase domain [IPR000719] (1); Serine-threonine/tyrosine-protein kinase catalytic domain [IPR012451] (1); Leucine-rich repeat [IPR001611] (1); Protein kinase, ATP binding site [IPR017441] (1) | -                             | C_uni_hli_02789_mRNA_3.1  | -                           |
| GF0043051 | 0                             | 1                         | 0                           | 0 Hypothetical protein (1)                                                               |                                                                                                                                                                                                                                                                                                                                                                                                                                                                                                                                                                                      |                                                                                                                                                                                                                                                                                                                                                                                                                                                                                             |                               | C_uni_hli_02789_mRNA_2.1  | -                           |
| GF0043050 | 0                             | 1                         | 0                           | 0 Hypothetical protein (1)                                                               |                                                                                                                                                                                                                                                                                                                                                                                                                                                                                                                                                                                      |                                                                                                                                                                                                                                                                                                                                                                                                                                                                                             |                               | C_uni_hli_02784_mRNA_1.1  | -                           |
| GF0043049 | 0                             | 1                         | 0                           | 0 Hypothetical protein (1)                                                               |                                                                                                                                                                                                                                                                                                                                                                                                                                                                                                                                                                                      |                                                                                                                                                                                                                                                                                                                                                                                                                                                                                             |                               | C_uni_hli_02783_mRNA_2.1  | -                           |
| GF0043048 | 0                             | 1                         | 0                           | 0 Hypothetical protein (1)                                                               |                                                                                                                                                                                                                                                                                                                                                                                                                                                                                                                                                                                      |                                                                                                                                                                                                                                                                                                                                                                                                                                                                                             |                               | C_uni_hli_02783_mRNA_1.1  | -                           |
| GF0043047 | 0                             | 1                         | 0                           | 0 Hypothetical protein (1)                                                               |                                                                                                                                                                                                                                                                                                                                                                                                                                                                                                                                                                                      |                                                                                                                                                                                                                                                                                                                                                                                                                                                                                             |                               | C_uni_hli_02782_mRNA_6.1  | -                           |
| GF0043046 | 0                             | 1                         | 0                           | 0 Hypothetical protein (1)                                                               |                                                                                                                                                                                                                                                                                                                                                                                                                                                                                                                                                                                      |                                                                                                                                                                                                                                                                                                                                                                                                                                                                                             |                               | C_uni_hli_02782_mRNA_3.1  | -                           |
| GF0043045 | 0                             | 1                         | 0                           | 0 Hypothetical protein (1)                                                               |                                                                                                                                                                                                                                                                                                                                                                                                                                                                                                                                                                                      |                                                                                                                                                                                                                                                                                                                                                                                                                                                                                             |                               | C_uni_hli_02782_mRNA_2.1  | -                           |
| GF0043044 | 0                             | 1                         | 0                           | 0 Hypothetical protein (1)                                                               |                                                                                                                                                                                                                                                                                                                                                                                                                                                                                                                                                                                      |                                                                                                                                                                                                                                                                                                                                                                                                                                                                                             |                               | C_uni_hli_02782_mRNA_1.1  | -                           |
| GF0043043 | 0                             | 1                         | 0                           | 0 Hypothetical protein (1)                                                               |                                                                                                                                                                                                                                                                                                                                                                                                                                                                                                                                                                                      |                                                                                                                                                                                                                                                                                                                                                                                                                                                                                             |                               | C_uni_hli_02780_mRNA_1.1  | -                           |
| GF0043042 | 0                             | 1                         | 0                           | 0 Hypothetical protein (1)                                                               |                                                                                                                                                                                                                                                                                                                                                                                                                                                                                                                                                                                      |                                                                                                                                                                                                                                                                                                                                                                                                                                                                                             |                               | C_uni_hli_02778_mRNA_1.1  | -                           |
| GF0043041 | 0                             | 1                         | 0                           | 0 Hypothetical protein (1)                                                               | protein binding [GO:0005515 molecular_function] (1)                                                                                                                                                                                                                                                                                                                                                                                                                                                                                                                                  | Domain of unknown function DUF1977, Dual-like [IPR015399] (1); WD40 repeat-containing domain [IPR017986] (1); WD40 repeat [IPR001680] (1); WD40/YVTN repeat-like-containing domain [IPR015943] (1)                                                                                                                                                                                                                                                                                          | -                             | C_uni_hli_02776_mRNA_2.1  | -                           |
| GF0043040 | 0                             | 1                         | 0                           | 0 Hypothetical protein (1)                                                               |                                                                                                                                                                                                                                                                                                                                                                                                                                                                                                                                                                                      |                                                                                                                                                                                                                                                                                                                                                                                                                                                                                             |                               | C_uni_hli_02771_mRNA_1.1  | -                           |
| GF0043039 | 0                             | 1                         | 0                           | 0 Hypothetical protein (1)                                                               |                                                                                                                                                                                                                                                                                                                                                                                                                                                                                                                                                                                      |                                                                                                                                                                                                                                                                                                                                                                                                                                                                                             |                               | C_uni_hli_02770_mRNA_8.1  | -                           |
| GF0043038 | 0                             | 1                         | 0                           | 0 Hypothetical protein (1)                                                               |                                                                                                                                                                                                                                                                                                                                                                                                                                                                                                                                                                                      |                                                                                                                                                                                                                                                                                                                                                                                                                                                                                             |                               | C_uni_hli_02770_mRNA_3.1  | -                           |
| GF0043037 | 0                             | 1                         | 0                           | 0 Hypothetical protein (1)                                                               |                                                                                                                                                                                                                                                                                                                                                                                                                                                                                                                                                                                      |                                                                                                                                                                                                                                                                                                                                                                                                                                                                                             |                               | C_uni_hli_02768_mRNA_2.1  | -                           |
| GF0043036 | 0                             | 1                         | 0                           | 0 Hypothetical protein (1)                                                               |                                                                                                                                                                                                                                                                                                                                                                                                                                                                                                                                                                                      |                                                                                                                                                                                                                                                                                                                                                                                                                                                                                             |                               | C_uni_hli_02767_mRNA_2.1  | -                           |
| GF0043035 | 0                             | 1                         | 0                           | 0 Hypothetical protein (1)                                                               |                                                                                                                                                                                                                                                                                                                                                                                                                                                                                                                                                                                      | Phox-associated domain [IPR003114] (1)                                                                                                                                                                                                                                                                                                                                                                                                                                                      |                               | C_uni_hli_02766_mRNA_2.1  | -                           |
| GF0043034 | 0                             | 1                         | 0                           | 0 Hypothetical protein (1)                                                               |                                                                                                                                                                                                                                                                                                                                                                                                                                                                                                                                                                                      |                                                                                                                                                                                                                                                                                                                                                                                                                                                                                             |                               | C_uni_hli_02766_mRNA_1.1  | -                           |
| GF0043033 | 0                             | 1                         | 0                           | 0 Hypothetical protein (1)                                                               | zinc ion binding [GO:0008270 molecular_function] (1)                                                                                                                                                                                                                                                                                                                                                                                                                                                                                                                                 | Zinc finger, PAM2-type [IPR006064] (1); Zinc finger, SWIM-type [IPR007527] (1)                                                                                                                                                                                                                                                                                                                                                                                                              |                               | C_uni_hli_02765_mRNA_2.1  | -                           |
| GF0043032 | 0                             | 1                         | 0                           | 0 Hypothetical protein (1)                                                               |                                                                                                                                                                                                                                                                                                                                                                                                                                                                                                                                                                                      |                                                                                                                                                                                                                                                                                                                                                                                                                                                                                             |                               | C_uni_hli_02765_mRNA_1.1  | -                           |
| GF0043031 | 0                             | 1                         | 0                           | 0 Cytochrome P450 76C2 (1)                                                               | oxidation-reduction process [GO:005514 biological_process] (1); oxidoreductase activity, acting on paired donors, with incorporation or reduction of molecular oxygen [GO:0016765 molecular_function] (1); monooxygenase activity [GO:0004499 molecular_function] (1); heme binding [GO:0020037 molecular_function] (1); iron ion binding [GO:0005506 molecular_function] (1)                                                                                                                                                                                                        | Cytochrome P450 [IPR001283] (1); Cytochrome P450, E-class, group IV [IPR020403] (1); Cytochrome P450, conserved site [IPR017922] (1)                                                                                                                                                                                                                                                                                                                                                        |                               | C_uni_hli_02764_mRNA_2.1  | -                           |
| GF0043030 | 0                             | 1                         | 0                           | 0 Geranyl 10-hydroxylase-like protein (1)                                                | oxidation-reduction process [GO:005514 biological_process] (1); oxidoreductase activity, acting on paired donors, with incorporation or reduction of molecular oxygen [GO:0016765 molecular_function] (1)                                                                                                                                                                                                                                                                                                                                                                            | Cytochrome P450, E-class, group I [IPR002401] (1); Cytochrome P450, conserved site [IPR017922] (1); Cytochrome P450 [IPR001283] (1)                                                                                                                                                                                                                                                                                                                                                         |                               | C_uni_hli_02764_mRNA_1.1  | -                           |
| GF0043029 | 0                             | 1                         | 0                           | 0 Hypothetical protein (1)                                                               |                                                                                                                                                                                                                                                                                                                                                                                                                                                                                                                                                                                      |                                                                                                                                                                                                                                                                                                                                                                                                                                                                                             |                               | C_uni_hli_02762_mRNA_3.1  | -                           |
| GF0043028 | 0                             | 1                         | 0                           | 0 Hypothetical protein (1)                                                               |                                                                                                                                                                                                                                                                                                                                                                                                                                                                                                                                                                                      |                                                                                                                                                                                                                                                                                                                                                                                                                                                                                             |                               | C_uni_hli_02762_mRNA_2.1  | -                           |
| GF0043027 | 0                             | 1                         | 0                           | 0 Sulfotransferase (1)                                                                   | sulfotransferase activity [GO:0008146 molecular_function] (1)                                                                                                                                                                                                                                                                                                                                                                                                                                                                                                                        | Sulfotransferase domain [IPR008863] (1); P-loop containing nucleoside triphosphate hydrolase [IPR027417] (1)                                                                                                                                                                                                                                                                                                                                                                                |                               | C_uni_hli_02761_mRNA_2.1  | -                           |
| GF0043026 | 0                             | 1                         | 0                           | 0 Hypothetical protein (1)                                                               |                                                                                                                                                                                                                                                                                                                                                                                                                                                                                                                                                                                      |                                                                                                                                                                                                                                                                                                                                                                                                                                                                                             |                               | C_uni_hli_02761_mRNA_1.1  | -                           |
| GF0043025 | 0                             | 1                         | 0                           | 0 Receptor like protein 21 (1)                                                           |                                                                                                                                                                                                                                                                                                                                                                                                                                                                                                                                                                                      | Leucine-rich repeat domain, L domain-like [IPR026751] (1); Leucine-rich repeat-containing N-terminal, plant-type [IPR013210] (1)                                                                                                                                                                                                                                                                                                                                                            |                               | C_uni_hli_02760_mRNA_2.1  | -                           |
| GF0043024 | 0                             | 1                         | 0                           | 0 Hypothetical protein (1)                                                               | nucleotide binding [GO:0000166 molecular_function] (1)                                                                                                                                                                                                                                                                                                                                                                                                                                                                                                                               | Nucleotide-binding alpha-beta plait domain [IPR012677] (1); Leucine-rich repeat [IPR001611] (1);                                                                                                                                                                                                                                                                                                                                                                                            |                               | C_uni_hli_02760_mRNA_1.1  | -                           |
| GF0043023 | 0                             | 1                         | 0                           | 0 Putative Leucine Rich Repeat Protein (1)                                               | protein binding [GO:0005515 molecular_function] (1)                                                                                                                                                                                                                                                                                                                                                                                                                                                                                                                                  | Leucine-rich repeat-containing N-terminal, plant-type [IPR012101] (1); Leucine-rich repeat domain, L domain-like [IPR026751] (1); Leucine-rich repeat, typical subtype [IPR003591] (1); Salkdax [IPR01040] (1); LysM domain [IPR014392] (1)                                                                                                                                                                                                                                                 |                               | C_uni_hli_02757_mRNA_2.1  | -                           |
| GF0043022 | 0                             | 1                         | 0                           | 0 Bur ap-box repeat family protein (1)                                                   |                                                                                                                                                                                                                                                                                                                                                                                                                                                                                                                                                                                      |                                                                                                                                                                                                                                                                                                                                                                                                                                                                                             |                               | C_uni_hli_02756_mRNA_1.1  | -                           |
| GF0043021 | 0                             | 1                         | 0                           | 0 Hypothetical protein (1)                                                               |                                                                                                                                                                                                                                                                                                                                                                                                                                                                                                                                                                                      |                                                                                                                                                                                                                                                                                                                                                                                                                                                                                             |                               | C_uni_hli_02755_mRNA_1.1  | -                           |
| GF0043020 | 0                             | 1                         | 0                           | 0 Hypothetical protein (1)                                                               |                                                                                                                                                                                                                                                                                                                                                                                                                                                                                                                                                                                      |                                                                                                                                                                                                                                                                                                                                                                                                                                                                                             |                               | C_uni_hli_02754_mRNA_3.1  | -                           |
| GF0043019 | 0                             | 1                         | 0                           | 0 Hypothetical protein (1)                                                               |                                                                                                                                                                                                                                                                                                                                                                                                                                                                                                                                                                                      |                                                                                                                                                                                                                                                                                                                                                                                                                                                                                             |                               | C_uni_hli_02754_mRNA_2.1  | -                           |
| GF0043018 | 0                             | 1                         | 0                           | 0 Hypothetical protein (1)                                                               |                                                                                                                                                                                                                                                                                                                                                                                                                                                                                                                                                                                      |                                                                                                                                                                                                                                                                                                                                                                                                                                                                                             |                               | C_uni_hli_02754_mRNA_1.1  | -                           |
| GF0043017 | 0                             | 1                         | 0                           | 0 Hypothetical protein (1)                                                               |                                                                                                                                                                                                                                                                                                                                                                                                                                                                                                                                                                                      |                                                                                                                                                                                                                                                                                                                                                                                                                                                                                             |                               | C_uni_hli_02752_mRNA_2.1  | -                           |
| GF0043016 | 0                             | 1                         | 0                           | 0 Plasma membrane ATPase (1)                                                             | nucleotide binding [GO:0000166 molecular_function] (1); ATP biosynthesis process [GO:0006754 biological_process] (1); metal ion binding [GO:0040872 molecular_function] (1); integral component of membrane [GO:0016021 cellular_component] (1); ATPase activity [GO:0016887 molecular_function] (1)                                                                                                                                                                                                                                                                                 | Cation-transporting P-type ATPase, N-terminal [IPR04014] (1); HAD-like domain [IPR023141] (1); P-type ATPase, A domain [IPR008250] (1); P-type ATPase, transmembrane domain [IPR023981] (1); P-type ATPase, cytoplasmic domain N [IPR022299] (1); P-type ATPase [IPR001757] (1); P-type ATPase, phosphorylation site [IPR018303] (1); F-type ATPase, subunit IIIA [IPR005431] (1)                                                                                                           |                               | C_uni_hli_02750_mRNA_1.1  | -                           |
| GF0043015 | 0                             | 1                         | 0                           | 0 Hypothetical protein (1)                                                               |                                                                                                                                                                                                                                                                                                                                                                                                                                                                                                                                                                                      |                                                                                                                                                                                                                                                                                                                                                                                                                                                                                             |                               | C_uni_hli_02746_mRNA_2.1  | -                           |
| GF0043014 | 0                             | 1                         | 0                           | 0 Hypothetical protein (1)                                                               |                                                                                                                                                                                                                                                                                                                                                                                                                                                                                                                                                                                      |                                                                                                                                                                                                                                                                                                                                                                                                                                                                                             |                               | C_uni_hli_02742_mRNA_2.1  | -                           |
| GF0043013 | 0                             | 1                         | 0                           | 0 Serine/threonine protein phosphatase 2A 57 kDa regulatory subunit B' alpha isoform (1) | protein phosphatase type 2A regulator activity [GO:0008061 molecular_function] (1); protein phosphatase type 2A complex [GO:0000139 cellular_component] (1); binding [GO:0005488 molecular_function] (1); signal transduction [GO:0007165 biological_process] (1); heme binding [GO:0020037 molecular_function] (1); iron ion binding [GO:0005506 molecular_function] (1); oxidoreductase activity, acting on paired donors, with incorporation or reduction of molecular oxygen [GO:0016765 molecular_function] (1); oxidation-reduction process [GO:005514 biological_process] (1) | Armadillo-type fold [IPR016024] (1); Protein phosphatase 2A, regulatory B subunit, B56 [IPR002354] (1)                                                                                                                                                                                                                                                                                                                                                                                      |                               | C_uni_hli_02741_mRNA_1.1  | -                           |
| GF0043012 | 0                             | 1                         | 0                           | 0 Hypothetical protein (1)                                                               |                                                                                                                                                                                                                                                                                                                                                                                                                                                                                                                                                                                      |                                                                                                                                                                                                                                                                                                                                                                                                                                                                                             |                               | C_uni_hli_02739_mRNA_2.1  | -                           |
| GF0043011 | 0                             | 1                         | 0                           | 0 Hypothetical protein (1)                                                               | nutrient reservoir activity [GO:0045735 molecular_function] (1)                                                                                                                                                                                                                                                                                                                                                                                                                                                                                                                      | RanG-like jelly roll fold [IPR014710] (1); Cupin [IPR006045] (1); RanG-like cupin domain [IPR014051] (1)                                                                                                                                                                                                                                                                                                                                                                                    |                               | C_uni_hli_02738_mRNA_2.1  | -                           |
| GF0043010 | 0                             | 1                         | 0                           | 0 Hypothetical protein (1)                                                               |                                                                                                                                                                                                                                                                                                                                                                                                                                                                                                                                                                                      |                                                                                                                                                                                                                                                                                                                                                                                                                                                                                             |                               | C_uni_hli_02737_mRNA_8.1  | -                           |
| GF0043009 | 0                             | 1                         | 0                           | 0 Hypothetical protein (1)                                                               |                                                                                                                                                                                                                                                                                                                                                                                                                                                                                                                                                                                      |                                                                                                                                                                                                                                                                                                                                                                                                                                                                                             |                               | C_uni_hli_02737_mRNA_5.1  | -                           |
| GF0043008 | 0                             | 1                         | 0                           | 0 Hypothetical protein (1)                                                               |                                                                                                                                                                                                                                                                                                                                                                                                                                                                                                                                                                                      |                                                                                                                                                                                                                                                                                                                                                                                                                                                                                             |                               | C_uni_hli_02737_mRNA_4.1  | -                           |
| GF0043007 | 0                             | 1                         | 0                           | 0 Hypothetical protein (1)                                                               |                                                                                                                                                                                                                                                                                                                                                                                                                                                                                                                                                                                      |                                                                                                                                                                                                                                                                                                                                                                                                                                                                                             |                               | C_uni_hli_02737_mRNA_2.1  | -                           |
| GF0043006 | 0                             | 1                         | 0                           | 0 Hypothetical protein (1)                                                               |                                                                                                                                                                                                                                                                                                                                                                                                                                                                                                                                                                                      |                                                                                                                                                                                                                                                                                                                                                                                                                                                                                             |                               | C_uni_hli_02737_mRNA_1.1  | -                           |
| GF0043005 | 0                             | 1                         | 0                           | 0 Hypothetical protein (1)                                                               |                                                                                                                                                                                                                                                                                                                                                                                                                                                                                                                                                                                      |                                                                                                                                                                                                                                                                                                                                                                                                                                                                                             |                               | C_uni_hli_02736_mRNA_2.1  | -                           |
| GF0043004 | 0                             | 1                         | 0                           | 0 Hypothetical protein (1)                                                               |                                                                                                                                                                                                                                                                                                                                                                                                                                                                                                                                                                                      |                                                                                                                                                                                                                                                                                                                                                                                                                                                                                             |                               | C_uni_hli_02733_mRNA_1.1  | -                           |
| GF0043003 | 0                             | 1                         | 0                           | 0 Hypothetical protein (1)                                                               |                                                                                                                                                                                                                                                                                                                                                                                                                                                                                                                                                                                      |                                                                                                                                                                                                                                                                                                                                                                                                                                                                                             |                               | C_uni_hli_02732_mRNA_5.1  | -                           |
| GF0043002 | 0                             | 1                         | 0                           | 0 Hypothetical protein (1)                                                               |                                                                                                                                                                                                                                                                                                                                                                                                                                                                                                                                                                                      |                                                                                                                                                                                                                                                                                                                                                                                                                                                                                             |                               | C_uni_hli_02732_mRNA_2.1  | -                           |
| GF0043001 | 0                             | 1                         | 0                           | 0 Hypothetical protein (1)                                                               |                                                                                                                                                                                                                                                                                                                                                                                                                                                                                                                                                                                      |                                                                                                                                                                                                                                                                                                                                                                                                                                                                                             |                               | C_uni_hli_02732_mRNA_1.1  | -                           |
| GF0043000 | 0                             | 1                         | 0                           | 0 Hypothetical protein (1)                                                               | In80 complex [GO:0031011 cellular_component] (1); chromatin remodeling [GO:0006038 biological_process] (1); regulation of transcription, DNA-templated [GO:0006355 biological_process] (1)                                                                                                                                                                                                                                                                                                                                                                                           | Vpo-72.51.1, C-terminal [IPR013272] (1); IN80 complex, subunit Ico6 [IPR028252] (1)                                                                                                                                                                                                                                                                                                                                                                                                         |                               | C_uni_hli_02728_mRNA_1.1  | -                           |
| GF0042999 | 0                             | 1                         | 0                           | 0 Hypothetical protein (1)                                                               |                                                                                                                                                                                                                                                                                                                                                                                                                                                                                                                                                                                      |                                                                                                                                                                                                                                                                                                                                                                                                                                                                                             |                               | C_uni_hli_02727_mRNA_2.1  | -                           |
| GF0042998 | 0                             | 1                         | 0                           | 0 Hypothetical protein (1)                                                               |                                                                                                                                                                                                                                                                                                                                                                                                                                                                                                                                                                                      |                                                                                                                                                                                                                                                                                                                                                                                                                                                                                             |                               | C_uni_hli_02726_mRNA_2.1  | -                           |
| GF0042997 | 0                             | 1                         | 0                           | 0 Hypothetical protein (1)                                                               |                                                                                                                                                                                                                                                                                                                                                                                                                                                                                                                                                                                      |                                                                                                                                                                                                                                                                                                                                                                                                                                                                                             |                               | C_uni_hli_02725_mRNA_1.1  | -                           |
| GF0042996 | 0                             | 1                         | 0                           | 0 Hypothetical protein (1)                                                               |                                                                                                                                                                                                                                                                                                                                                                                                                                                                                                                                                                                      |                                                                                                                                                                                                                                                                                                                                                                                                                                                                                             |                               | C_uni_hli_02722_mRNA_3.1  | -                           |
| GF0042995 | 0                             | 1                         | 0                           | 0 Hypothetical protein (1)                                                               |                                                                                                                                                                                                                                                                                                                                                                                                                                                                                                                                                                                      |                                                                                                                                                                                                                                                                                                                                                                                                                                                                                             |                               | C_uni_hli_02722_mRNA_2.1  | -                           |
| GF0042994 | 0                             | 1                         | 0                           | 0 Hypothetical protein (1)                                                               |                                                                                                                                                                                                                                                                                                                                                                                                                                                                                                                                                                                      |                                                                                                                                                                                                                                                                                                                                                                                                                                                                                             |                               | C_uni_hli_02722_mRNA_4.1  | -                           |
| GF0042993 | 0                             | 1                         | 0                           | 0 Cytokinin riboside 5'-monophosphate phosphoribosyltransferase (1)                      |                                                                                                                                                                                                                                                                                                                                                                                                                                                                                                                                                                                      |                                                                                                                                                                                                                                                                                                                                                                                                                                                                                             |                               | C_uni_hli_02722_mRNA_3.1  | -                           |
| GF0042992 | 0                             | 1                         | 0                           | 0 Hypothetical protein (1)                                                               |                                                                                                                                                                                                                                                                                                                                                                                                                                                                                                                                                                                      |                                                                                                                                                                                                                                                                                                                                                                                                                                                                                             |                               | C_uni_hli_02722_mRNA_2.1  | -                           |
| GF0042991 | 0                             | 1                         | 0                           | 0 Hypothetical protein (1)                                                               |                                                                                                                                                                                                                                                                                                                                                                                                                                                                                                                                                                                      |                                                                                                                                                                                                                                                                                                                                                                                                                                                                                             |                               | C_uni_hli_02722_mRNA_1.1  | -                           |
| GF0042990 | 0                             | 1                         | 0                           | 0 Hypothetical protein (1)                                                               |                                                                                                                                                                                                                                                                                                                                                                                                                                                                                                                                                                                      |                                                                                                                                                                                                                                                                                                                                                                                                                                                                                             |                               | C_uni_hli_02721_mRNA_2.1  | -                           |
| GF0042989 | 0                             | 1                         | 0                           | 0 Putative RNA-directed DNA polymerase (1)                                               | nucleic acid binding [GO:0003676 molecular_function] (1); RNA-DNA hybrid ribonuclease activity [GO:0004522 molecular_function] (1)                                                                                                                                                                                                                                                                                                                                                                                                                                                   | Leucine-rich repeat domain, L domain-like [IPR026751] (1)                                                                                                                                                                                                                                                                                                                                                                                                                                   |                               | C_uni_hli_02721_mRNA_1.1  | -                           |
| GF0042988 | 0                             | 1                         | 0                           | 0 Hypothetical protein (1)                                                               | nucleic acid binding [GO:0003676 molecular_function] (1)                                                                                                                                                                                                                                                                                                                                                                                                                                                                                                                             | Ribonuclease H domain [IPR002156] (1); Ribonuclease H-like domain [IPR012337] (1)                                                                                                                                                                                                                                                                                                                                                                                                           |                               | C_uni_hli_02720_mRNA_4.1  | -                           |
| GF0042987 | 0                             | 1                         | 0                           | 0 Hypothetical protein (1)                                                               |                                                                                                                                                                                                                                                                                                                                                                                                                                                                                                                                                                                      |                                                                                                                                                                                                                                                                                                                                                                                                                                                                                             |                               | C_uni_hli_02720_mRNA_3.1  | -                           |
| GF0042986 | 0                             | 1                         | 0                           | 0 Putative retroelement pol/protein (1)                                                  |                                                                                                                                                                                                                                                                                                                                                                                                                                                                                                                                                                                      | Domain of unknown function DUF4283 [IPR025588] (1)                                                                                                                                                                                                                                                                                                                                                                                                                                          |                               | C_uni_hli_02718_mRNA_1.1  | -                           |
| GF0042985 | 0                             | 1                         | 0                           | 0 Hypothetical protein (1)                                                               |                                                                                                                                                                                                                                                                                                                                                                                                                                                                                                                                                                                      |                                                                                                                                                                                                                                                                                                                                                                                                                                                                                             |                               | C_uni_hli_02716_mRNA_4.1  | -                           |
| GF0042984 | 0                             | 1                         | 0                           | 0 Hypothetical protein (1)                                                               |                                                                                                                                                                                                                                                                                                                                                                                                                                                                                                                                                                                      |                                                                                                                                                                                                                                                                                                                                                                                                                                                                                             |                               | C_uni_hli_02714_mRNA_2.1  | -                           |
| GF0042983 | 0                             | 1                         | 0                           | 0 Hypothetical protein (1)                                                               |                                                                                                                                                                                                                                                                                                                                                                                                                                                                                                                                                                                      |                                                                                                                                                                                                                                                                                                                                                                                                                                                                                             |                               | C_uni_hli_02710_mRNA_5.1  | -                           |
| GF0042982 | 0                             | 1                         | 0                           | 0 Hypothetical protein (1)                                                               |                                                                                                                                                                                                                                                                                                                                                                                                                                                                                                                                                                                      |                                                                                                                                                                                                                                                                                                                                                                                                                                                                                             |                               | C_uni_hli_02709_mRNA_1.1  | -                           |
| GF0042981 | 0                             | 1                         | 0                           | 0 Defective in marisium silencing protein (1)                                            |                                                                                                                                                                                                                                                                                                                                                                                                                                                                                                                                                                                      | LOG family [IPR011001] (1)                                                                                                                                                                                                                                                                                                                                                                                                                                                                  |                               | C_uni_hli_02708_mRNA_4.1  | -                           |

| ID        | Num. in <i>C. crottensteini</i> | Num. in <i>C. caudata</i> | Num. in <i>P. trifidata</i> | Note                                                               | GO                                                                                                                                                                                                                                                                                                                                                                                                              | InterPro                                                                                                                                                                                                                                                                                                                                                                                                             | Members in <i>C. crottensteini</i> | Members in <i>C. caudata</i> | Members in <i>P. trifidata</i> |
|-----------|---------------------------------|---------------------------|-----------------------------|--------------------------------------------------------------------|-----------------------------------------------------------------------------------------------------------------------------------------------------------------------------------------------------------------------------------------------------------------------------------------------------------------------------------------------------------------------------------------------------------------|----------------------------------------------------------------------------------------------------------------------------------------------------------------------------------------------------------------------------------------------------------------------------------------------------------------------------------------------------------------------------------------------------------------------|------------------------------------|------------------------------|--------------------------------|
| GF0042880 | 0                               | 1                         | 0                           | Transcription elongation factor S-II (1)                           | transcription, DNA-templated [GO:0005571 biological_process] (1); zinc ion binding [GO:0008270 molecular_function] (1); regulation of DNA-templated transcription, elongation [GO:002784 biological_process] (1); DNA binding [GO:0003777 molecular_function] (1); nucleus [GO:0005634 cellular_component] (1); regulation of transcription from RNA polymerase II promoter [GO:0006357 biological_process] (1) | Transcription elongation factor S-IIIM [IPRO17890] (1); Transcription factor IIS, N-terminal [IPRO17923] (1); Transcription elongation factor, TFIIS-CSR70, N-terminal, sub-type [IPRO030113] (1); Transcription elongation factor, TFIIS-related [IPRO16492] (1); Transcription elongation factor S-II, central domain [IPRO03618] (1)                                                                              | -                                  | C_unihii_02708_mRNA_2.1      | -                              |
| GF0042879 | 0                               | 1                         | 0                           | Orf258 protein (1)                                                 |                                                                                                                                                                                                                                                                                                                                                                                                                 | Reverse transcriptase zinc-binding domain [IPRO26960] (1); Endonuclease/exonuclease/phosphatase [IPRO05135] (4)                                                                                                                                                                                                                                                                                                      | -                                  | C_unihii_02707_mRNA_4.1      | -                              |
| GF0042878 | 0                               | 1                         | 0                           | Hypothetical protein (1)                                           |                                                                                                                                                                                                                                                                                                                                                                                                                 |                                                                                                                                                                                                                                                                                                                                                                                                                      | -                                  | C_unihii_02705_mRNA_2.1      | -                              |
| GF0042877 | 0                               | 1                         | 0                           | Hypothetical protein (1)                                           |                                                                                                                                                                                                                                                                                                                                                                                                                 |                                                                                                                                                                                                                                                                                                                                                                                                                      | -                                  | C_unihii_02703_mRNA_4.1      | -                              |
| GF0042876 | 0                               | 1                         | 0                           | Hypothetical protein (1)                                           |                                                                                                                                                                                                                                                                                                                                                                                                                 |                                                                                                                                                                                                                                                                                                                                                                                                                      | -                                  | C_unihii_02703_mRNA_3.1      | -                              |
| GF0042875 | 0                               | 1                         | 0                           | Hypothetical protein (1)                                           |                                                                                                                                                                                                                                                                                                                                                                                                                 |                                                                                                                                                                                                                                                                                                                                                                                                                      | -                                  | C_unihii_02703_mRNA_2.1      | -                              |
| GF0042874 | 0                               | 1                         | 0                           | Ankyrin repeat and protein kinase domains-containing protein 1 (1) |                                                                                                                                                                                                                                                                                                                                                                                                                 |                                                                                                                                                                                                                                                                                                                                                                                                                      | -                                  | C_unihii_02702_mRNA_3.1      | -                              |
| GF0042873 | 0                               | 1                         | 0                           | Hypothetical protein (1)                                           |                                                                                                                                                                                                                                                                                                                                                                                                                 |                                                                                                                                                                                                                                                                                                                                                                                                                      | -                                  | C_unihii_02701_mRNA_3.1      | -                              |
| GF0042872 | 0                               | 1                         | 0                           | RNA-directed DNA polymerase ; Ribonuclease H, putative (1)         |                                                                                                                                                                                                                                                                                                                                                                                                                 | Endonuclease/exonuclease/phosphatase [IPRO05135] (4)                                                                                                                                                                                                                                                                                                                                                                 | -                                  | C_unihii_02701_mRNA_1.1      | -                              |
| GF0042871 | 0                               | 1                         | 0                           | Hypothetical protein (1)                                           | metabolic process [GO:0008152 biological_process] (1); transferase activity, transferring acyl groups [GO:0016746 molecular_function] (1)                                                                                                                                                                                                                                                                       | Phospholipid glycerol acyltransferase [IPRO02123] (1)                                                                                                                                                                                                                                                                                                                                                                | -                                  | C_unihii_02699_mRNA_1.1      | -                              |
| GF0042870 | 0                               | 1                         | 0                           | Hypothetical protein (1)                                           |                                                                                                                                                                                                                                                                                                                                                                                                                 |                                                                                                                                                                                                                                                                                                                                                                                                                      | -                                  | C_unihii_02697_mRNA_2.1      | -                              |
| GF0042869 | 0                               | 1                         | 0                           | Hypothetical protein (1)                                           |                                                                                                                                                                                                                                                                                                                                                                                                                 |                                                                                                                                                                                                                                                                                                                                                                                                                      | -                                  | C_unihii_02697_mRNA_1.1      | -                              |
| GF0042868 | 0                               | 1                         | 0                           | Hypothetical protein (1)                                           |                                                                                                                                                                                                                                                                                                                                                                                                                 |                                                                                                                                                                                                                                                                                                                                                                                                                      | -                                  | C_unihii_02696_mRNA_2.1      | -                              |
| GF0042867 | 0                               | 1                         | 0                           | Hypothetical protein (1)                                           |                                                                                                                                                                                                                                                                                                                                                                                                                 |                                                                                                                                                                                                                                                                                                                                                                                                                      | -                                  | C_unihii_02695_mRNA_1.1      | -                              |
| GF0042866 | 0                               | 1                         | 0                           | Hypothetical protein (1)                                           |                                                                                                                                                                                                                                                                                                                                                                                                                 |                                                                                                                                                                                                                                                                                                                                                                                                                      | -                                  | C_unihii_02694_mRNA_2.1      | -                              |
| GF0042865 | 0                               | 1                         | 0                           | Hypothetical protein (1)                                           |                                                                                                                                                                                                                                                                                                                                                                                                                 |                                                                                                                                                                                                                                                                                                                                                                                                                      | -                                  | C_unihii_02694_mRNA_1.1      | -                              |
| GF0042864 | 0                               | 1                         | 0                           | Hypothetical protein (1)                                           |                                                                                                                                                                                                                                                                                                                                                                                                                 | Leucine-rich repeat domain, L domain-like [IPRO2675] (1)                                                                                                                                                                                                                                                                                                                                                             | -                                  | C_unihii_02693_mRNA_1.1      | -                              |
| GF0042863 | 0                               | 1                         | 0                           | Hypothetical protein (1)                                           |                                                                                                                                                                                                                                                                                                                                                                                                                 | Leucine-rich repeat domain, L domain-like [IPRO2675] (1); Leucine-rich repeat [IPRO1611] (1)                                                                                                                                                                                                                                                                                                                         | -                                  | C_unihii_02688_mRNA_3.1      | -                              |
| GF0042862 | 0                               | 1                         | 0                           | Hypothetical protein (1)                                           | protein binding [GO:0005515 molecular_function] (1)                                                                                                                                                                                                                                                                                                                                                             |                                                                                                                                                                                                                                                                                                                                                                                                                      | -                                  | C_unihii_02688_mRNA_2.1      | -                              |
| GF0042861 | 0                               | 1                         | 0                           | Hypothetical protein (1)                                           |                                                                                                                                                                                                                                                                                                                                                                                                                 |                                                                                                                                                                                                                                                                                                                                                                                                                      | -                                  | C_unihii_02685_mRNA_1.1      | -                              |
| GF0042860 | 0                               | 1                         | 0                           | Hypothetical protein (1)                                           |                                                                                                                                                                                                                                                                                                                                                                                                                 |                                                                                                                                                                                                                                                                                                                                                                                                                      | -                                  | C_unihii_02684_mRNA_2.1      | -                              |
| GF0042859 | 0                               | 1                         | 0                           | Hypothetical protein (1)                                           |                                                                                                                                                                                                                                                                                                                                                                                                                 |                                                                                                                                                                                                                                                                                                                                                                                                                      | -                                  | C_unihii_02684_mRNA_1.1      | -                              |
| GF0042858 | 0                               | 1                         | 0                           | Hypothetical protein (1)                                           |                                                                                                                                                                                                                                                                                                                                                                                                                 |                                                                                                                                                                                                                                                                                                                                                                                                                      | -                                  | C_unihii_02683_mRNA_3.1      | -                              |
| GF0042857 | 0                               | 1                         | 0                           | Hypothetical protein (1)                                           |                                                                                                                                                                                                                                                                                                                                                                                                                 |                                                                                                                                                                                                                                                                                                                                                                                                                      | -                                  | C_unihii_02683_mRNA_2.1      | -                              |
| GF0042856 | 0                               | 1                         | 0                           | Hypothetical protein (1)                                           |                                                                                                                                                                                                                                                                                                                                                                                                                 |                                                                                                                                                                                                                                                                                                                                                                                                                      | -                                  | C_unihii_02683_mRNA_1.1      | -                              |
| GF0042855 | 0                               | 1                         | 0                           | Putative disease resistance protein RGA3 (1)                       | ADP binding [GO:0045331 molecular_function] (1)                                                                                                                                                                                                                                                                                                                                                                 | NB-ABC [IPRO2182] (1); P-loop containing nucleoside triphosphate hydrolase [IPRO27417] (1)                                                                                                                                                                                                                                                                                                                           | -                                  | C_unihii_02682_mRNA_2.1      | -                              |
| GF0042854 | 0                               | 1                         | 0                           | Hypothetical protein (1)                                           |                                                                                                                                                                                                                                                                                                                                                                                                                 | Leucine-rich repeat domain, L domain-like [IPRO2675] (1)                                                                                                                                                                                                                                                                                                                                                             | -                                  | C_unihii_02682_mRNA_1.1      | -                              |
| GF0042853 | 0                               | 1                         | 0                           | ABC transporter A family protein, putative (1)                     | transporter activity [GO:0005215 molecular_function] (1); integral component of membrane [GO:0016021 cellular_component] (1); transport [GO:0006610 biological_process] (1)                                                                                                                                                                                                                                     | ABC transporter A, ABCA [IPRO26082] (1)                                                                                                                                                                                                                                                                                                                                                                              | -                                  | C_unihii_02680_mRNA_1.1      | -                              |
| GF0042852 | 0                               | 1                         | 0                           | Heat shock 70 kDa protein (1)                                      |                                                                                                                                                                                                                                                                                                                                                                                                                 | Heat shock protein 70 family [IPRO13126] (1); Heat shock protein 70, conserved site [IPRO18181] (1); Heat shock protein 70kD, C-terminal domain [IPRO29048] (1); Heat shock protein 70kD, peptide-binding domain [IPRO29047] (4)                                                                                                                                                                                     | -                                  | C_unihii_02677_mRNA_3.1      | -                              |
| GF0042851 | 0                               | 1                         | 0                           | Heat shock 70kDa protein 1.8 (1)                                   |                                                                                                                                                                                                                                                                                                                                                                                                                 | Heat shock protein 70 family [IPRO13126] (1); Heat shock protein 70, conserved site [IPRO18181] (1)                                                                                                                                                                                                                                                                                                                  | -                                  | C_unihii_02677_mRNA_2.1      | -                              |
| GF0042850 | 0                               | 1                         | 0                           | Hypothetical protein (1)                                           |                                                                                                                                                                                                                                                                                                                                                                                                                 |                                                                                                                                                                                                                                                                                                                                                                                                                      | -                                  | C_unihii_02676_mRNA_2.1      | -                              |
| GF0042849 | 0                               | 1                         | 0                           | Hypothetical protein (1)                                           |                                                                                                                                                                                                                                                                                                                                                                                                                 |                                                                                                                                                                                                                                                                                                                                                                                                                      | -                                  | C_unihii_02676_mRNA_1.1      | -                              |
| GF0042848 | 0                               | 1                         | 0                           | F-box FHLDR-repeat protein AFS6420 (1)                             | protein binding [GO:0005515 molecular_function] (1)                                                                                                                                                                                                                                                                                                                                                             | F-box domain [IPRO01810] (1); Leucine-rich repeat domain, L domain-like [IPRO2675] (1); FHD domain [IPRO06566] (1)                                                                                                                                                                                                                                                                                                   | -                                  | C_unihii_02674_mRNA_2.1      | -                              |
| GF0042847 | 0                               | 1                         | 0                           | Hypothetical protein (1)                                           |                                                                                                                                                                                                                                                                                                                                                                                                                 |                                                                                                                                                                                                                                                                                                                                                                                                                      | -                                  | C_unihii_02674_mRNA_1.1      | -                              |
| GF0042846 | 0                               | 1                         | 0                           | Hypothetical protein (1)                                           |                                                                                                                                                                                                                                                                                                                                                                                                                 |                                                                                                                                                                                                                                                                                                                                                                                                                      | -                                  | C_unihii_02671_mRNA_2.1      | -                              |
| GF0042845 | 0                               | 1                         | 0                           | Hypothetical protein (1)                                           |                                                                                                                                                                                                                                                                                                                                                                                                                 |                                                                                                                                                                                                                                                                                                                                                                                                                      | -                                  | C_unihii_02670_mRNA_3.1      | -                              |
| GF0042844 | 0                               | 1                         | 0                           | Hypothetical protein (1)                                           |                                                                                                                                                                                                                                                                                                                                                                                                                 |                                                                                                                                                                                                                                                                                                                                                                                                                      | -                                  | C_unihii_02670_mRNA_1.1      | -                              |
| GF0042843 | 0                               | 1                         | 0                           | Hypothetical protein (1)                                           | metal ion binding [GO:0046872 molecular_function] (1); nucleoside binding [GO:0001666 molecular_function] (1)                                                                                                                                                                                                                                                                                                   | P-type ATPase, transmembrane domain [IPRO23298] (1); P-type ATPase, A domain [IPRO05050] (1)                                                                                                                                                                                                                                                                                                                         | -                                  | C_unihii_02669_mRNA_2.1      | -                              |
| GF0042842 | 0                               | 1                         | 0                           | Two-component response regulator ARR9 (1)                          | phosphorelay signal transduction system [GO:0000160 biological_process] (1)                                                                                                                                                                                                                                                                                                                                     | Chi-Y-like superfamily [IPRO11086] (1); Signal transduction response regulator, receiver domain [IPRO01789] (1)                                                                                                                                                                                                                                                                                                      | -                                  | C_unihii_02669_mRNA_1.1      | -                              |
| GF0042841 | 0                               | 1                         | 0                           | Hypothetical protein (1)                                           |                                                                                                                                                                                                                                                                                                                                                                                                                 |                                                                                                                                                                                                                                                                                                                                                                                                                      | -                                  | C_unihii_02667_mRNA_3.1      | -                              |
| GF0042840 | 0                               | 1                         | 0                           | Hypothetical protein (1)                                           | proteolysis [GO:0006508 biological_process] (1); metalloprotease activity [GO:0004131 molecular_function] (1); zinc ion binding [GO:0008270 molecular_function] (1)                                                                                                                                                                                                                                             | Peptidase M14, carboxypeptidase A [IPRO00834] (1)                                                                                                                                                                                                                                                                                                                                                                    | -                                  | C_unihii_02667_mRNA_2.1      | -                              |
| GF0042839 | 0                               | 1                         | 0                           | Hypothetical protein (1)                                           |                                                                                                                                                                                                                                                                                                                                                                                                                 | DNA-binding pseudorepeat domain [IPRO15300] (1)                                                                                                                                                                                                                                                                                                                                                                      | -                                  | C_unihii_02667_mRNA_1.1      | -                              |
| GF0042838 | 0                               | 1                         | 0                           | Phenazine biosynthesis PhtC/Phf family protein (1)                 | biocatalytic process [GO:0008058 biological_process] (1); catalytic activity [GO:0003824 molecular_function] (1)                                                                                                                                                                                                                                                                                                | Phenazine biosynthesis PhtF protein [IPRO03719] (1)                                                                                                                                                                                                                                                                                                                                                                  | -                                  | C_unihii_02666_mRNA_1.1      | -                              |
| GF0042837 | 0                               | 1                         | 0                           | Hypothetical protein (1)                                           |                                                                                                                                                                                                                                                                                                                                                                                                                 |                                                                                                                                                                                                                                                                                                                                                                                                                      | -                                  | C_unihii_02665_mRNA_3.1      | -                              |
| GF0042836 | 0                               | 1                         | 0                           | Hypothetical protein (1)                                           | catalytic activity [GO:0003824 molecular_function] (1)                                                                                                                                                                                                                                                                                                                                                          | Pyridoxal phosphate-dependent transferase, major region, subdomain 2 [IPRO15422] (1); Pyridoxal phosphate-dependent transferase [IPRO15424] (1)                                                                                                                                                                                                                                                                      | -                                  | C_unihii_02665_mRNA_1.1      | -                              |
| GF0042835 | 0                               | 1                         | 0                           | Hypothetical protein (1)                                           |                                                                                                                                                                                                                                                                                                                                                                                                                 | Domain of unknown function DUF4283 [IPRO25558] (1)                                                                                                                                                                                                                                                                                                                                                                   | -                                  | C_unihii_02662_mRNA_4.1      | -                              |
| GF0042834 | 0                               | 1                         | 0                           | Hypothetical protein (1)                                           |                                                                                                                                                                                                                                                                                                                                                                                                                 |                                                                                                                                                                                                                                                                                                                                                                                                                      | -                                  | C_unihii_02662_mRNA_3.1      | -                              |
| GF0042833 | 0                               | 1                         | 0                           | S-adenosylmethionine synthase 2 (1)                                | methionine adenosyltransferase activity [GO:0004479 molecular_function] (1); adenosylmethionine biosynthetic process [GO:0006556 biological_process] (1); ATP binding [GO:0005254 molecular_function] (1); nucleic acid binding [GO:0003676 molecular_function] (1)                                                                                                                                             | S-adenosylmethionine synthetase superfamily [IPRO22636] (1); S-adenosylmethionine synthetase, conserved site [IPRO22631] (1); Ribonuclease H-like domain [IPRO12537] (1); S-adenosylmethionine synthetase, N-terminal [IPRO22628] (1); S-adenosylmethionine synthetase, C-terminal [IPRO22630] (1); S-adenosylmethionine synthetase, central domain [IPRO22629] (1); S-adenosylmethionine synthetase [IPRO02133] (4) | -                                  | C_unihii_02662_mRNA_2.1      | -                              |
| GF0042832 | 0                               | 1                         | 0                           | O-Glycosyl hydrolases family 17 protein (1)                        |                                                                                                                                                                                                                                                                                                                                                                                                                 | X8 domain [IPRO12946] (1)                                                                                                                                                                                                                                                                                                                                                                                            | -                                  | C_unihii_02662_mRNA_1.1      | -                              |
| GF0042831 | 0                               | 1                         | 0                           | Hypothetical protein (1)                                           |                                                                                                                                                                                                                                                                                                                                                                                                                 |                                                                                                                                                                                                                                                                                                                                                                                                                      | -                                  | C_unihii_02661_mRNA_1.1      | -                              |
| GF0042830 | 0                               | 1                         | 0                           | Hypothetical protein (1)                                           |                                                                                                                                                                                                                                                                                                                                                                                                                 |                                                                                                                                                                                                                                                                                                                                                                                                                      | -                                  | C_unihii_02660_mRNA_3.1      | -                              |
| GF0042829 | 0                               | 1                         | 0                           | Hypothetical protein (1)                                           |                                                                                                                                                                                                                                                                                                                                                                                                                 |                                                                                                                                                                                                                                                                                                                                                                                                                      | -                                  | C_unihii_02660_mRNA_2.1      | -                              |
| GF0042828 | 0                               | 1                         | 0                           | Hypothetical protein (1)                                           |                                                                                                                                                                                                                                                                                                                                                                                                                 | MAGE homology domain [IPRO02190] (1)                                                                                                                                                                                                                                                                                                                                                                                 | -                                  | C_unihii_02659_mRNA_1.1      | -                              |
| GF0042827 | 0                               | 1                         | 0                           | Protein UNUSUAL FLORAL ORGANS (1)                                  | protein binding [GO:0005515 molecular_function] (1)                                                                                                                                                                                                                                                                                                                                                             | Kelch-type beta propeller [IPRO15915] (1); F-box domain [IPRO01810] (1); Galactose oxidase/kelch, beta-propeller [IPRO11043] (1)                                                                                                                                                                                                                                                                                     | -                                  | C_unihii_02658_mRNA_3.1      | -                              |
| GF0042826 | 0                               | 1                         | 0                           | RING-FYVE-PHD zinc finger protein (1)                              | protein binding [GO:0005515 molecular_function] (1); zinc ion binding [GO:0008270 molecular_function] (1); zinc finger, PHD-type [GO:0008080 molecular_function] (1)                                                                                                                                                                                                                                            | Jas TPL-binding domain [IPRO32308] (1); Zinc finger, PHD-finger [IPRO19787] (1); Zinc finger, PHD-type [IPRO01965] (1); GNAT domain [IPRO00182] (1); Zinc finger, RING-FYVE-PHD-type [IPRO13083] (1); Zinc finger, PHD-type, conserved site [IPRO19786] (1); Acyl-CysA_N-acyltransferase [IPRO18181] (1); Zinc finger, FYVE-PHD-type [IPRO11011] (4)                                                                 | -                                  | C_unihii_02658_mRNA_2.1      | -                              |
| GF0042825 | 0                               | 1                         | 0                           | Hypothetical protein (1)                                           | protein binding [GO:0005515 molecular_function] (1)                                                                                                                                                                                                                                                                                                                                                             | Tetranoptopyridine-like helical domain [IPRO11960] (1)                                                                                                                                                                                                                                                                                                                                                               | -                                  | C_unihii_02658_mRNA_1.1      | -                              |
| GF0042824 | 0                               | 1                         | 0                           | Hypothetical protein (1)                                           |                                                                                                                                                                                                                                                                                                                                                                                                                 |                                                                                                                                                                                                                                                                                                                                                                                                                      | -                                  | C_unihii_02657_mRNA_5.1      | -                              |
| GF0042823 | 0                               | 1                         | 0                           | Hypothetical protein (1)                                           | nucleic acid binding [GO:0003676 molecular_function] (1)                                                                                                                                                                                                                                                                                                                                                        | Ribonuclease H-like domain [IPRO12337] (1)                                                                                                                                                                                                                                                                                                                                                                           | -                                  | C_unihii_02657_mRNA_4.1      | -                              |
| GF0042822 | 0                               | 1                         | 0                           | Zinc finger NUTCRACKER-like protein (1)                            |                                                                                                                                                                                                                                                                                                                                                                                                                 | Endonuclease/exonuclease/phosphatase [IPRO05135] (4)                                                                                                                                                                                                                                                                                                                                                                 | -                                  | C_unihii_02655_mRNA_1.1      | -                              |
| GF0042821 | 0                               | 1                         | 0                           | Hypothetical protein (1)                                           |                                                                                                                                                                                                                                                                                                                                                                                                                 |                                                                                                                                                                                                                                                                                                                                                                                                                      | -                                  | C_unihii_02655_mRNA_3.1      | -                              |
| GF0042820 | 0                               | 1                         | 0                           | Reticulocyte-binding 2 a (1)                                       |                                                                                                                                                                                                                                                                                                                                                                                                                 |                                                                                                                                                                                                                                                                                                                                                                                                                      | -                                  | C_unihii_02649_mRNA_2.1      | -                              |
| GF0042819 | 0                               | 1                         | 0                           | Hypothetical protein (1)                                           |                                                                                                                                                                                                                                                                                                                                                                                                                 | Leucine-rich repeat domain, L domain-like [IPRO2675] (1)                                                                                                                                                                                                                                                                                                                                                             | -                                  | C_unihii_02648_mRNA_1.1      | -                              |
| GF0042818 | 0                               | 1                         | 0                           | Hypothetical protein (1)                                           |                                                                                                                                                                                                                                                                                                                                                                                                                 |                                                                                                                                                                                                                                                                                                                                                                                                                      | -                                  | C_unihii_02647_mRNA_2.1      | -                              |
| GF0042817 | 0                               | 1                         | 0                           | Lipid transfer protein (1)                                         |                                                                                                                                                                                                                                                                                                                                                                                                                 | Hydrophobic seed protein [IPRO27923] (1); Bidirectional inhibitor/plant lipid transfer protein seed storage helical domain [IPRO16140] (1)                                                                                                                                                                                                                                                                           | -                                  | C_unihii_02646_mRNA_1.1      | -                              |
| GF0042816 | 0                               | 1                         | 0                           | Hypothetical protein (1)                                           |                                                                                                                                                                                                                                                                                                                                                                                                                 |                                                                                                                                                                                                                                                                                                                                                                                                                      | -                                  | C_unihii_02645_mRNA_1.1      | -                              |
| GF0042815 | 0                               | 1                         | 0                           | Mannosidic transport protein (1)                                   |                                                                                                                                                                                                                                                                                                                                                                                                                 |                                                                                                                                                                                                                                                                                                                                                                                                                      | -                                  | C_unihii_02645_mRNA_2.1      | -                              |
| GF0042814 | 0                               | 1                         | 0                           | Hypothetical protein (1)                                           |                                                                                                                                                                                                                                                                                                                                                                                                                 |                                                                                                                                                                                                                                                                                                                                                                                                                      | -                                  | C_unihii_02643_mRNA_1.1      | -                              |
| GF0042813 | 0                               | 1                         | 0                           | Hypothetical protein (1)                                           |                                                                                                                                                                                                                                                                                                                                                                                                                 | Protein-only RNase P, C-terminal [IPRO31595] (1)                                                                                                                                                                                                                                                                                                                                                                     | -                                  | C_unihii_02642_mRNA_2.1      | -                              |
| GF0042812 | 0                               | 1                         | 0                           | Hypothetical protein (1)                                           |                                                                                                                                                                                                                                                                                                                                                                                                                 |                                                                                                                                                                                                                                                                                                                                                                                                                      | -                                  | C_unihii_02641_mRNA_1.1      | -                              |
| GF0042811 | 0                               | 1                         | 0                           | Hypothetical protein (1)                                           |                                                                                                                                                                                                                                                                                                                                                                                                                 |                                                                                                                                                                                                                                                                                                                                                                                                                      | -                                  | C_unihii_02640_mRNA_1.1      | -                              |
| GF0042810 | 0                               | 1                         | 0                           | Hypothetical protein (1)                                           |                                                                                                                                                                                                                                                                                                                                                                                                                 |                                                                                                                                                                                                                                                                                                                                                                                                                      | -                                  | C_unihii_02635_mRNA_3.1      | -                              |
| GF0042809 | 0                               | 1                         | 0                           | Hypothetical protein (1)                                           |                                                                                                                                                                                                                                                                                                                                                                                                                 |                                                                                                                                                                                                                                                                                                                                                                                                                      | -                                  | C_unihii_02635_mRNA_2.1      | -                              |
| GF0042808 | 0                               | 1                         | 0                           | Hypothetical protein (1)                                           |                                                                                                                                                                                                                                                                                                                                                                                                                 |                                                                                                                                                                                                                                                                                                                                                                                                                      | -                                  | C_unihii_02630_mRNA_1.1      | -                              |
| GF0042807 | 0                               | 1                         | 0                           | Hypothetical protein (1)                                           |                                                                                                                                                                                                                                                                                                                                                                                                                 |                                                                                                                                                                                                                                                                                                                                                                                                                      | -                                  | C_unihii_02629_mRNA_2.1      | -                              |

| ID        | Num. in <i>C. crottensteini</i> | Num. in <i>C. caudata</i> | Num. in <i>P. putida</i> | Note                                                        | GO                                                                                                                                                                                                                                                                                                                                                                                                                                                                                                                        | InterPro                                                                                                                                                                                                                     | Members in <i>C. crottensteini</i> | Members in <i>C. caudata</i> | Members in <i>P. putida</i> |
|-----------|---------------------------------|---------------------------|--------------------------|-------------------------------------------------------------|---------------------------------------------------------------------------------------------------------------------------------------------------------------------------------------------------------------------------------------------------------------------------------------------------------------------------------------------------------------------------------------------------------------------------------------------------------------------------------------------------------------------------|------------------------------------------------------------------------------------------------------------------------------------------------------------------------------------------------------------------------------|------------------------------------|------------------------------|-----------------------------|
| GF0042906 | 0                               | 1                         | 0                        | 3-ketoacyl-CoA synthase 4 (1)                               | fatty acid biosynthetic process [GO:0006633 biological_process] (1); transferase activity, transferring acyl groups other than amino-acyl groups [GO:0016147 molecular_function] (1); catalytic activity [GO:0003824 molecular_function] (1); metabolic process [GO:0008152 biological_process] (1); membrane [GO:0016020 cellular_component] (1)                                                                                                                                                                         | Very-long-chain 3-ketoacyl-CoA synthase [IPR012392] (1); Thiolic-like [IPR016039] (1); FA1-Type III polkade-carboxylase-like protein [IPR013601] (1)                                                                         | -                                  | C_umbii_02628_mRNA_1.1       | -                           |
| GF0042905 | 0                               | 1                         | 0                        | 0 Hypothetical protein (1)                                  | -                                                                                                                                                                                                                                                                                                                                                                                                                                                                                                                         | -                                                                                                                                                                                                                            | -                                  | C_umbii_02626_mRNA_4.1       | -                           |
| GF0042904 | 0                               | 1                         | 0                        | 0 Receptor like protein 33 (1)                              | protein binding [GO:0005515 molecular_function] (1)                                                                                                                                                                                                                                                                                                                                                                                                                                                                       | Leucine-rich repeat, typical subtype [IPR005991] (1); Leucine-rich repeat domain, 1 domain-like [IPR020751] (1); Leucine-rich repeat [IPR01611] (1); Leucine-rich repeat-containing N-terminal, plant-type [IPR013210] (1)   | -                                  | C_umbii_02626_mRNA_3.1       | -                           |
| GF0042903 | 0                               | 1                         | 0                        | 0 Hypothetical protein (1)                                  | hydrolase activity [GO:0016787 molecular_function] (1); metabolic process [GO:0008152 biological_process] (1)                                                                                                                                                                                                                                                                                                                                                                                                             | Alpha/beta hydrolase fold-3 [IPR013094] (1); Alpha/Beta hydrolase fold [IPR020608] (1)                                                                                                                                       | -                                  | C_umbii_02622_mRNA_1.1       | -                           |
| GF0042902 | 0                               | 1                         | 0                        | 0 Hypothetical protein (1)                                  | -                                                                                                                                                                                                                                                                                                                                                                                                                                                                                                                         | -                                                                                                                                                                                                                            | -                                  | C_umbii_02620_mRNA_1.1       | -                           |
| GF0042901 | 0                               | 1                         | 0                        | 0 Hypothetical protein (1)                                  | -                                                                                                                                                                                                                                                                                                                                                                                                                                                                                                                         | -                                                                                                                                                                                                                            | -                                  | C_umbii_02618_mRNA_1.1       | -                           |
| GF0042900 | 0                               | 1                         | 0                        | 0 Hypothetical protein (1)                                  | ATP binding [GO:0005524 molecular_function] (1)                                                                                                                                                                                                                                                                                                                                                                                                                                                                           | P-loop containing nucleoside triphosphate hydrolase [IPR027417] (1); CtpA/B conserved site 1 [IPR018368] (1)                                                                                                                 | -                                  | C_umbii_02617_mRNA_5.1       | -                           |
| GF0042899 | 0                               | 1                         | 0                        | 0 Hypothetical protein (1)                                  | -                                                                                                                                                                                                                                                                                                                                                                                                                                                                                                                         | -                                                                                                                                                                                                                            | -                                  | C_umbii_02617_mRNA_4.1       | -                           |
| GF0042898 | 0                               | 1                         | 0                        | 0 Hypothetical protein (1)                                  | -                                                                                                                                                                                                                                                                                                                                                                                                                                                                                                                         | -                                                                                                                                                                                                                            | -                                  | C_umbii_02617_mRNA_3.1       | -                           |
| GF0042897 | 0                               | 1                         | 0                        | 0 Hypothetical protein (1)                                  | protein phosphorylation [GO:0006468 biological_process] (1); protein kinase activity [GO:0004672 molecular_function] (1)                                                                                                                                                                                                                                                                                                                                                                                                  | Serine/threonine/tyrosine-protein kinase catalytic domain [IPR01265] (1); Protein-kinase-like domain [IPR011009] (1)                                                                                                         | -                                  | C_umbii_02615_mRNA_1.1       | -                           |
| GF0042896 | 0                               | 1                         | 0                        | 0 Hypothetical protein (1)                                  | -                                                                                                                                                                                                                                                                                                                                                                                                                                                                                                                         | -                                                                                                                                                                                                                            | -                                  | C_umbii_02611_mRNA_2.1       | -                           |
| GF0042895 | 0                               | 1                         | 0                        | 0 Hypothetical protein (1)                                  | -                                                                                                                                                                                                                                                                                                                                                                                                                                                                                                                         | -                                                                                                                                                                                                                            | -                                  | C_umbii_02610_mRNA_2.1       | -                           |
| GF0042894 | 0                               | 1                         | 0                        | 0 Hypothetical protein (1)                                  | -                                                                                                                                                                                                                                                                                                                                                                                                                                                                                                                         | -                                                                                                                                                                                                                            | -                                  | C_umbii_02610_mRNA_1.1       | -                           |
| GF0042893 | 0                               | 1                         | 0                        | 0 Long-chain-alkanol oxidase FAO4A (1)                      | oxidation-reduction process [GO:0055114 biological_process] (1); oxidoreductase activity [GO:0016491 molecular_function] (1); flavin adenine dinucleotide binding [GO:0050660 molecular_function] (1); oxidoreductase activity, acting on CH-OH group of donors [GO:0016614 molecular_function] (1)                                                                                                                                                                                                                       | FAD/NAD(P)-binding domain [IPR027373] (1); Glucose-methanol-choline oxidoreductase, N-terminal [IPR001072] (1)                                                                                                               | -                                  | C_umbii_02609_mRNA_5.1       | -                           |
| GF0042892 | 0                               | 1                         | 0                        | 0 Hypothetical protein (1)                                  | -                                                                                                                                                                                                                                                                                                                                                                                                                                                                                                                         | -                                                                                                                                                                                                                            | -                                  | C_umbii_02609_mRNA_4.1       | -                           |
| GF0042891 | 0                               | 1                         | 0                        | 0 E3 ubiquitin-protein ligase BAH1 (1)                      | metal ion binding [GO:0046872 molecular_function] (1); zinc ion binding [GO:0000270 molecular_function] (1); protein binding [GO:0005515 molecular_function] (1)                                                                                                                                                                                                                                                                                                                                                          | Zinc finger, RING-FYVE/PHD-type [IPR013603] (1); Zinc finger, C1HC4 RING-type [IPR018957] (1); Zinc finger, RING-type, conserved site [IPR017907] (1); Zinc finger, RING-type [IPR001441] (1)                                | -                                  | C_umbii_02609_mRNA_2.1       | -                           |
| GF0042890 | 0                               | 1                         | 0                        | 0 Glutathione gamma-glutamylcysteinyltransferase (1)        | response to metal ion [GO:0010038 biological_process] (1); phytylcholin biosynthetic process [GO:0046938 biological_process] (1); glutathione gamma-glutamylcysteinyltransferase activity [GO:0016756 molecular_function] (1); metal ion binding [GO:0046872 molecular_function] (1)                                                                                                                                                                                                                                      | Phytylcholin synthase, C-terminal [IPR015407] (1); Phytolcholin synthase [IPR00719] (1)                                                                                                                                      | -                                  | C_umbii_02609_mRNA_1.1       | -                           |
| GF0042889 | 0                               | 1                         | 0                        | 0 Hypothetical protein (1)                                  | nucleic acid binding [GO:0003676 molecular_function] (1)                                                                                                                                                                                                                                                                                                                                                                                                                                                                  | G-patch domain [IPR000467] (1)                                                                                                                                                                                               | -                                  | C_umbii_02608_mRNA_1.1       | -                           |
| GF0042888 | 0                               | 1                         | 0                        | 0 Hypothetical protein (1)                                  | ATP binding [GO:0005524 molecular_function] (1); protein phosphorylation [GO:0006468 biological_process] (1); protein kinase activity [GO:0004672 molecular_function] (1)                                                                                                                                                                                                                                                                                                                                                 | Protein kinase domain [IPR000719] (1); Concanavalin A-like lectin/glycanase domain [IPR013320] (1); Protein kinase-like domain [IPR011009] (1); Protein kinase, ATP binding site [IPR017441] (1)                             | -                                  | C_umbii_02607_mRNA_2.1       | -                           |
| GF0042887 | 0                               | 1                         | 0                        | 0 Polyol transporter 5 (1)                                  | transmembrane transport [GO:0050885 biological_process] (1); transporter activity [GO:0006215 molecular_function] (1); transmembrane transporter activity [GO:0022857 molecular_function] (1); membrane [GO:0016020 cellular_component] (1); integral component of membrane [GO:0016021 cellular_component] (1); substrate-specific transmembrane transporter activity [GO:0022891 molecular_function] (1)                                                                                                                | Sugar/inositol transporter [IPR003663] (1); Major facilitator, sugar transporter-like [IPR005828] (1); Major facilitator superfamily domain [IPR020846] (1); Sugar transporter, conserved site [IPR00829] (1)                | -                                  | C_umbii_02606_mRNA_3.1       | -                           |
| GF0042886 | 0                               | 1                         | 0                        | 0 Hypothetical protein (1)                                  | -                                                                                                                                                                                                                                                                                                                                                                                                                                                                                                                         | -                                                                                                                                                                                                                            | -                                  | C_umbii_02606_mRNA_2.1       | -                           |
| GF0042885 | 0                               | 1                         | 0                        | 0 Hypothetical protein (1)                                  | -                                                                                                                                                                                                                                                                                                                                                                                                                                                                                                                         | -                                                                                                                                                                                                                            | -                                  | C_umbii_02606_mRNA_1.1       | -                           |
| GF0042884 | 0                               | 1                         | 0                        | 0 LRR receptor-like kinase plant (1)                        | -                                                                                                                                                                                                                                                                                                                                                                                                                                                                                                                         | Leucine-rich repeat domain, L domain-like [IPR026275] (1); Maelectin-like carbohydrate-binding domain [IPR024788] (1)                                                                                                        | -                                  | C_umbii_02604_mRNA_3.1       | -                           |
| GF0042883 | 0                               | 1                         | 0                        | 0 Hypothetical protein (1)                                  | -                                                                                                                                                                                                                                                                                                                                                                                                                                                                                                                         | Maelectin-like carbohydrate-binding domain [IPR024788] (1)                                                                                                                                                                   | -                                  | C_umbii_02604_mRNA_1.1       | -                           |
| GF0042882 | 0                               | 1                         | 0                        | 0 Phosphothio resistance protein RpsYD29-1 (1)              | ADP binding [GO:0043531 molecular_function] (1)                                                                                                                                                                                                                                                                                                                                                                                                                                                                           | Leucine-rich repeat domain, L domain-like [IPR026275] (1); P-loop containing nucleoside triphosphate hydrolase [IPR027417] (1); NB-ARC [IPR02182] (1)                                                                        | -                                  | C_umbii_02603_mRNA_3.1       | -                           |
| GF0042881 | 0                               | 1                         | 0                        | 0 Phospholipase A2 family protein (1)                       | calcium ion binding [GO:0005509 molecular_function] (1); phospholipase A2 activity [GO:0004623 molecular_function] (1); lipid catabolic process [GO:0016042 biological_process] (1)                                                                                                                                                                                                                                                                                                                                       | Phospholipase A2 domain [IPR016090] (1); Phospholipase A2 [IPR01211] (1)                                                                                                                                                     | -                                  | C_umbii_02600_mRNA_2.1       | -                           |
| GF0042880 | 0                               | 1                         | 0                        | 0 Thylakoid lumenal 17.4 kDa protein, chloroplastic (1)     | -                                                                                                                                                                                                                                                                                                                                                                                                                                                                                                                         | Pentapeptide repeat [IPR001646] (1)                                                                                                                                                                                          | -                                  | C_umbii_02600_mRNA_1.1       | -                           |
| GF0042879 | 0                               | 1                         | 0                        | 0 Hypothetical protein (1)                                  | -                                                                                                                                                                                                                                                                                                                                                                                                                                                                                                                         | -                                                                                                                                                                                                                            | -                                  | C_umbii_02598_mRNA_3.1       | -                           |
| GF0042878 | 0                               | 1                         | 0                        | 0 Epidermal-specific secreted glycoprotein EPI (1)          | -                                                                                                                                                                                                                                                                                                                                                                                                                                                                                                                         | Bull-type lectin domain [IPR001480] (1)                                                                                                                                                                                      | -                                  | C_umbii_02596_mRNA_1.1       | -                           |
| GF0042877 | 0                               | 1                         | 0                        | 0 Hypothetical protein (1)                                  | -                                                                                                                                                                                                                                                                                                                                                                                                                                                                                                                         | -                                                                                                                                                                                                                            | -                                  | C_umbii_02593_mRNA_2.1       | -                           |
| GF0042876 | 0                               | 1                         | 0                        | 0 Disease resistance protein RPS2 (1)                       | -                                                                                                                                                                                                                                                                                                                                                                                                                                                                                                                         | -                                                                                                                                                                                                                            | -                                  | C_umbii_02592_mRNA_1.1       | -                           |
| GF0042875 | 0                               | 1                         | 0                        | 0 Hypothetical protein (1)                                  | intracellular [GO:0005622 cellular_component] (1); translation [GO:0006412 biological_process] (1); structural constituent of ribosome [GO:0033735 molecular_function] (1); ribosome [GO:0005840 cellular_component] (1)                                                                                                                                                                                                                                                                                                  | Ribosomal protein S3Ac [IPR001593] (1)                                                                                                                                                                                       | -                                  | C_umbii_02589_mRNA_6.1       | -                           |
| GF0042874 | 0                               | 1                         | 0                        | 0 Hypothetical protein (1)                                  | -                                                                                                                                                                                                                                                                                                                                                                                                                                                                                                                         | -                                                                                                                                                                                                                            | -                                  | C_umbii_02589_mRNA_2.1       | -                           |
| GF0042873 | 0                               | 1                         | 0                        | 0 Hypothetical protein (1)                                  | -                                                                                                                                                                                                                                                                                                                                                                                                                                                                                                                         | -                                                                                                                                                                                                                            | -                                  | C_umbii_02588_mRNA_2.1       | -                           |
| GF0042872 | 0                               | 1                         | 0                        | 0 Hypothetical protein (1)                                  | -                                                                                                                                                                                                                                                                                                                                                                                                                                                                                                                         | -                                                                                                                                                                                                                            | -                                  | C_umbii_02586_mRNA_2.1       | -                           |
| GF0042871 | 0                               | 1                         | 0                        | 0 Hypothetical protein (1)                                  | -                                                                                                                                                                                                                                                                                                                                                                                                                                                                                                                         | -                                                                                                                                                                                                                            | -                                  | C_umbii_02585_mRNA_5.1       | -                           |
| GF0042870 | 0                               | 1                         | 0                        | 0 Hypothetical protein (1)                                  | -                                                                                                                                                                                                                                                                                                                                                                                                                                                                                                                         | -                                                                                                                                                                                                                            | -                                  | C_umbii_02585_mRNA_4.1       | -                           |
| GF0042869 | 0                               | 1                         | 0                        | 0 Hypothetical protein (1)                                  | -                                                                                                                                                                                                                                                                                                                                                                                                                                                                                                                         | -                                                                                                                                                                                                                            | -                                  | C_umbii_02581_mRNA_2.1       | -                           |
| GF0042868 | 0                               | 1                         | 0                        | 0 Proline-rich receptor-like protein kinase PERK13 (1)      | ATP binding [GO:0005524 molecular_function] (1); protein phosphorylation [GO:0006468 biological_process] (1); protein kinase activity [GO:0004672 molecular_function] (1)                                                                                                                                                                                                                                                                                                                                                 | Protein kinase-like domain [IPR011009] (1); Protein kinase domain [IPR000719] (1)                                                                                                                                            | -                                  | C_umbii_02581_mRNA_1.1       | -                           |
| GF0042867 | 0                               | 1                         | 0                        | 0 Hypothetical protein (1)                                  | nucleic acid binding [GO:0003676 molecular_function] (1); ATP binding [GO:0005524 molecular_function] (1); DNA binding [GO:0003677 molecular_function] (1); ATP-dependent DNA helicase activity [GO:0004003 molecular_function] (1); ATP-dependent helicase activity [GO:0008026 molecular_function] (1); nucleoside-containing compound metabolic process [GO:0006139 biological_process] (1); hydrolase activity, acting on acid anhydrides, in phospho-ester-containing anhydrides [GO:0016818 molecular_function] (1) | P-loop containing nucleoside triphosphate hydrolase [IPR027417] (1); ATP-dependent helicase, C-terminal [IPR006555] (1); Helicase superfamily 1/2, ATP-binding domain, DnaR/Rad3-type [IPR01461] (1); DE-AD3 [IPR010614] (1) | -                                  | C_umbii_02579_mRNA_4.1       | -                           |
| GF0042866 | 0                               | 1                         | 0                        | 0 Mutator-like transposase (1)                              | zinc ion binding [GO:0008270 molecular_function] (1); nucleic acid binding [GO:0003676 molecular_function] (1)                                                                                                                                                                                                                                                                                                                                                                                                            | Zinc finger, CCHC-type [IPR001878] (1); MULE transposase domain [IPR018289] (1); Zinc finger, PAM2-type [IPR006664] (1); Transposase, MuIR, plant [IPR004332] (1); Zinc finger, SWIM-type [IPR007527] (1)                    | -                                  | C_umbii_02578_mRNA_4.1       | -                           |
| GF0042865 | 0                               | 1                         | 0                        | 0 Putative nitrate transporter 1.2-like (1)                 | transporter activity [GO:0005215 molecular_function] (1); transport [GO:000610 biological_process] (1); coenzyme [GO:0016020 cellular_component] (1)                                                                                                                                                                                                                                                                                                                                                                      | Proton-dependent oligopeptide transporter family [IPR00109] (1)                                                                                                                                                              | -                                  | C_umbii_02578_mRNA_1.1       | -                           |
| GF0042864 | 0                               | 1                         | 0                        | 0 Transcription factor (1)                                  | protein dimerization activity [GO:0046983 molecular_function] (1); DNA binding [GO:0003677 molecular_function] (1)                                                                                                                                                                                                                                                                                                                                                                                                        | Mys-type, basic helix-loop-helix (bHLH) domain [IPR011598] (1); Myb domain, plant [IPR006447] (1); Homeodomain-like [IPR009057] (1)                                                                                          | -                                  | C_umbii_02576_mRNA_1.1       | -                           |
| GF0042863 | 0                               | 1                         | 0                        | 0 Hypothetical protein (1)                                  | -                                                                                                                                                                                                                                                                                                                                                                                                                                                                                                                         | -                                                                                                                                                                                                                            | -                                  | C_umbii_02575_mRNA_4.1       | -                           |
| GF0042862 | 0                               | 1                         | 0                        | 0 Hypothetical protein (1)                                  | -                                                                                                                                                                                                                                                                                                                                                                                                                                                                                                                         | -                                                                                                                                                                                                                            | -                                  | C_umbii_02574_mRNA_4.1       | -                           |
| GF0042861 | 0                               | 1                         | 0                        | 0 Disease resistance protein family, putative isoform 2 (1) | ADP binding [GO:0043531 molecular_function] (1)                                                                                                                                                                                                                                                                                                                                                                                                                                                                           | P-loop containing nucleoside triphosphate hydrolase [IPR027417] (1); NB-ARC [IPR02182] (1); Domain of unknown function DF4220 [IPR02315] (1); Leucine-rich repeat domain, L domain-like [IPR026275] (1)                      | -                                  | C_umbii_02574_mRNA_2.1       | -                           |
| GF0042860 | 0                               | 1                         | 0                        | 0 Class III homodomain leucine zipper                       | -                                                                                                                                                                                                                                                                                                                                                                                                                                                                                                                         | MEKHLA [IPR013978] (1)                                                                                                                                                                                                       | -                                  | C_umbii_02574_mRNA_1.1       | -                           |
| GF0042859 | 0                               | 1                         | 0                        | 0 O-acyltransferase WSD1 (1)                                | diacylglycerol O-acyltransferase activity [GO:0004144 molecular_function] (1)                                                                                                                                                                                                                                                                                                                                                                                                                                             | O-acyltransferase WSD1, C-terminal [IPR009721] (1)                                                                                                                                                                           | -                                  | C_umbii_02573_mRNA_1.1       | -                           |
| GF0042858 | 0                               | 1                         | 0                        | 0 Plasma membrane fusion PRM1 (1)                           | -                                                                                                                                                                                                                                                                                                                                                                                                                                                                                                                         | -                                                                                                                                                                                                                            | -                                  | C_umbii_02572_mRNA_4.1       | -                           |
| GF0042857 | 0                               | 1                         | 0                        | 0 Hypothetical protein (1)                                  | -                                                                                                                                                                                                                                                                                                                                                                                                                                                                                                                         | -                                                                                                                                                                                                                            | -                                  | C_umbii_02572_mRNA_3.1       | -                           |

| ID        | Num. in C. crottensteii | Num. in C. auris | Num. in P. putidus | Note                                                             | GO                                                                                                                                                                                                                                                          | InterPro                                                                                                                                                                                                                                                                                                                                           | Members in C. crottensteii | Members in C. auris    | Members in P. putidus |
|-----------|-------------------------|------------------|--------------------|------------------------------------------------------------------|-------------------------------------------------------------------------------------------------------------------------------------------------------------------------------------------------------------------------------------------------------------|----------------------------------------------------------------------------------------------------------------------------------------------------------------------------------------------------------------------------------------------------------------------------------------------------------------------------------------------------|----------------------------|------------------------|-----------------------|
| GF0042856 | 0                       | 1                | 0                  | Hypothetical protein (1)                                         |                                                                                                                                                                                                                                                             | Galactose oxidase, beta-propeller [IPR019161] (1); Leucine-rich repeat domain, I. domain-like [IPR026751] (1); Leucine-rich repeat, typical subtype [IPR013591] (1); Leucine-rich repeat [IPR01611] (1); NB-ARC [IPR021812] (1); P-loop containing nucleoside triphosphate hydrolase [IPR027417] (1)                                               |                            | C_umbii_02570_mRNA_3.1 |                       |
| GF0042855 | 0                       | 1                | 0                  | Hypothetical protein (1)                                         | ADP binding [GO:0043531]<br>molecular_function (1); protein binding [GO:0005515 molecular_function] (1)                                                                                                                                                     |                                                                                                                                                                                                                                                                                                                                                    |                            | C_umbii_02569_mRNA_1.1 |                       |
| GF0042854 | 0                       | 1                | 0                  | Hypothetical protein (1)                                         | protein dimerization activity [GO:0046983 molecular_function] (1); nucleic acid binding [GO:0003676 molecular_function] (1)                                                                                                                                 | Ribonuclease H-like domain [IPR012337] (1); HAT, C-terminal dimerization domain [IPR008906] (1)                                                                                                                                                                                                                                                    |                            | C_umbii_02568_mRNA_3.1 |                       |
| GF0042853 | 0                       | 1                | 0                  | Hypothetical protein (1)                                         |                                                                                                                                                                                                                                                             | Isopeptidase N synthase-like [IPR027443] (1)                                                                                                                                                                                                                                                                                                       |                            | C_umbii_02566_mRNA_2.1 |                       |
| GF0042852 | 0                       | 1                | 0                  | Hypothetical protein (1)                                         |                                                                                                                                                                                                                                                             |                                                                                                                                                                                                                                                                                                                                                    |                            | C_umbii_02565_mRNA_1.1 |                       |
| GF0042851 | 0                       | 1                | 0                  | Hypothetical protein (1)                                         |                                                                                                                                                                                                                                                             |                                                                                                                                                                                                                                                                                                                                                    |                            | C_umbii_02565_mRNA_4.1 |                       |
| GF0042850 | 0                       | 1                | 0                  | Hypothetical protein (1)                                         | Cytokinin riboside 5'-monophosphate phosphoribosyltransferase (1)                                                                                                                                                                                           |                                                                                                                                                                                                                                                                                                                                                    |                            | C_umbii_02563_mRNA_5.1 |                       |
| GF0042849 | 0                       | 1                | 0                  | Hypothetical protein (1)                                         |                                                                                                                                                                                                                                                             |                                                                                                                                                                                                                                                                                                                                                    |                            | C_umbii_02563_mRNA_4.1 |                       |
| GF0042848 | 0                       | 1                | 0                  | Hypothetical protein (1)                                         |                                                                                                                                                                                                                                                             | Reverse transcriptase domain [IPR000477] (1)                                                                                                                                                                                                                                                                                                       |                            | C_umbii_02563_mRNA_3.1 |                       |
| GF0042847 | 0                       | 1                | 0                  | Hypothetical protein (1)                                         |                                                                                                                                                                                                                                                             |                                                                                                                                                                                                                                                                                                                                                    |                            | C_umbii_02563_mRNA_2.1 |                       |
| GF0042846 | 0                       | 1                | 0                  | DEAD-box ATP-dependent RNA helicase 57 (1)                       | ATP binding [GO:0005524]<br>molecular_function (1); nucleic acid binding [GO:0003676 molecular_function] (1)                                                                                                                                                | RNA helicase, DEAD-box type, Q motif [IPR014014] (1); Helicase superfamily 1/2, ATP-binding domain [IPR014001] (1); DEAD/DEAF1 box helicase domain [IPR015451] (1); P-loop containing nucleoside triphosphate hydrolase [IPR027417] (1); ATP-dependent RNA helicase DEAD-box, conserved site [IPR008293] (1); Helicase, C-terminal [IPR016501] (1) |                            | C_umbii_02562_mRNA_2.1 |                       |
| GF0042845 | 0                       | 1                | 0                  | Cateolic acid 3-O-methyltransferase (1)                          | O-methyltransferase activity [GO:0008171 molecular_function] (1); protein dimerization activity [GO:0046983 molecular_function] (1); methyltransferase activity [GO:0008168 molecular_function] (1)                                                         | S-adenosyl-L-methionine-dependent methyltransferase [IPR029063] (1); Winged helix-turn-helix DNA-binding domain [IPR015991] (1); O-methyltransferase, family 2 [IPR010077] (1); O-methyltransferase CGMT-type [IPR016461] (1); Plant methyltransferase dimerization [IPR012967] (1)                                                                |                            | C_umbii_02559_mRNA_4.1 |                       |
| GF0042844 | 0                       | 1                | 0                  | Hypothetical protein (1)                                         |                                                                                                                                                                                                                                                             |                                                                                                                                                                                                                                                                                                                                                    |                            | C_umbii_02559_mRNA_3.1 |                       |
| GF0042843 | 0                       | 1                | 0                  | Hypothetical protein (1)                                         |                                                                                                                                                                                                                                                             |                                                                                                                                                                                                                                                                                                                                                    |                            | C_umbii_02559_mRNA_2.1 |                       |
| GF0042842 | 0                       | 1                | 0                  | Hypothetical protein (1)                                         |                                                                                                                                                                                                                                                             |                                                                                                                                                                                                                                                                                                                                                    |                            | C_umbii_02558_mRNA_1.1 |                       |
| GF0042841 | 0                       | 1                | 0                  | Cateolic acid O-methyltransferase (1)                            | methyltransferase activity [GO:0008168 molecular_function] (1); O-methyltransferase activity [GO:0008171 molecular_function] (1); protein dimerization activity [GO:0046983 molecular_function] (1)                                                         | O-methyltransferase CGMT-type [IPR016461] (1); Plant methyltransferase dimerization [IPR012967] (1); Winged helix-turn-helix DNA-binding domain [IPR015991] (1); O-methyltransferase, family 2 [IPR010077] (1); S-adenosyl-L-methionine-dependent methyltransferase [IPR029063] (1)                                                                |                            | C_umbii_02555_mRNA_2.1 |                       |
| GF0042840 | 0                       | 1                | 0                  | Hypothetical protein (1)                                         |                                                                                                                                                                                                                                                             | SGNH hydrolase-type esterase domain [IPR013810] (1)                                                                                                                                                                                                                                                                                                |                            | C_umbii_02555_mRNA_1.1 |                       |
| GF0042839 | 0                       | 1                | 0                  | Hypothetical protein (1)                                         |                                                                                                                                                                                                                                                             | Zinc finger, TTF-type [IPR006580] (1); Domain of unknown function DU4571 [IPR025981] (1)                                                                                                                                                                                                                                                           |                            | C_umbii_02554_mRNA_1.1 |                       |
| GF0042838 | 0                       | 1                | 0                  | Disease resistance protein (CC-NBS-LRR class) family protein (1) | ADP binding [GO:0043531]<br>molecular_function (1)                                                                                                                                                                                                          | P-loop containing nucleoside triphosphate hydrolase [IPR027417] (1); NB-ARC [IPR021812] (1); Leucine-rich repeat domain, I. domain-like [IPR026751] (1); Ribonuclease H-like domain [IPR012337] (1)                                                                                                                                                |                            | C_umbii_02553_mRNA_3.1 |                       |
| GF0042837 | 0                       | 1                | 0                  | Hypothetical protein (1)                                         | nucleic acid binding [GO:0003676 molecular_function] (1)                                                                                                                                                                                                    |                                                                                                                                                                                                                                                                                                                                                    |                            | C_umbii_02551_mRNA_2.1 |                       |
| GF0042836 | 0                       | 1                | 0                  | Hypothetical protein (1)                                         |                                                                                                                                                                                                                                                             | Reverse transcriptase zinc-binding domain [IPR026960] (1)                                                                                                                                                                                                                                                                                          |                            | C_umbii_02551_mRNA_1.1 |                       |
| GF0042835 | 0                       | 1                | 0                  | Hypothetical protein (1)                                         |                                                                                                                                                                                                                                                             |                                                                                                                                                                                                                                                                                                                                                    |                            | C_umbii_02550_mRNA_4.1 |                       |
| GF0042834 | 0                       | 1                | 0                  | Hypothetical protein (1)                                         |                                                                                                                                                                                                                                                             |                                                                                                                                                                                                                                                                                                                                                    |                            | C_umbii_02547_mRNA_2.1 |                       |
| GF0042833 | 0                       | 1                | 0                  | Ferrochelatase (1)                                               | heme biosynthetic process [GO:0006783 biological_process] (1); ferrochelatase activity [GO:0004225 molecular_function] (1)                                                                                                                                  | Chlorophyll a/b binding protein domain [IPR032329] (1); Ferrochelatase [IPR010151] (1); Chlorophyll A-B binding protein [IPR022796] (1); Ferrochelatase, active site [IPR019722] (1)                                                                                                                                                               |                            | C_umbii_02546_mRNA_1.1 |                       |
| GF0042832 | 0                       | 1                | 0                  | Hypothetical protein (1)                                         | membrane [GO:0016020 cellular_component] (1)                                                                                                                                                                                                                | ABC-transporter extracellular N-terminal domain [IPR029881] (1); ABC-2 type transporter [IPR013525] (1); Plant PDR ABC transporter associated [IPR013581] (1)                                                                                                                                                                                      |                            | C_umbii_02543_mRNA_3.1 |                       |
| GF0042831 | 0                       | 1                | 0                  | Hypothetical protein (1)                                         |                                                                                                                                                                                                                                                             |                                                                                                                                                                                                                                                                                                                                                    |                            | C_umbii_02543_mRNA_2.1 |                       |
| GF0042830 | 0                       | 1                | 0                  | Hypothetical protein (1)                                         |                                                                                                                                                                                                                                                             |                                                                                                                                                                                                                                                                                                                                                    |                            | C_umbii_02542_mRNA_2.1 |                       |
| GF0042829 | 0                       | 1                | 0                  | Hypothetical protein (1)                                         |                                                                                                                                                                                                                                                             |                                                                                                                                                                                                                                                                                                                                                    |                            | C_umbii_02542_mRNA_1.1 |                       |
| GF0042828 | 0                       | 1                | 0                  | CST complex subunit CTC1 (1)                                     |                                                                                                                                                                                                                                                             |                                                                                                                                                                                                                                                                                                                                                    |                            | C_umbii_02541_mRNA_1.1 |                       |
| GF0042827 | 0                       | 1                | 0                  | Hypothetical protein (1)                                         | MORC family CW-type zinc finger protein 3 isoform 2 (1)                                                                                                                                                                                                     | Histidine kinase-like ATPase, C-terminal domain [IPR003594] (1)                                                                                                                                                                                                                                                                                    |                            | C_umbii_02539_mRNA_2.1 |                       |
| GF0042826 | 0                       | 1                | 0                  | Hypothetical protein (1)                                         |                                                                                                                                                                                                                                                             |                                                                                                                                                                                                                                                                                                                                                    |                            | C_umbii_02537_mRNA_5.1 |                       |
| GF0042825 | 0                       | 1                | 0                  | Hypothetical protein (1)                                         | carboxylic acid metabolic process [GO:0019752 biological_process] (1); carboxyl-lyase activity [GO:0016851 molecular_function] (1); pyridoxal phosphate binding [GO:0030170 molecular_function] (1); catalytic activity [GO:0003824 molecular_function] (1) | Pyridoxal phosphate-dependent decarboxylase [IPR012911] (1); Pyridoxal phosphate-dependent transferase [IPR014243] (1); Pyridoxal phosphate-dependent transferase, major repeat, subdomain 2 [IPR015422] (1)                                                                                                                                       |                            | C_umbii_02537_mRNA_4.1 |                       |
| GF0042824 | 0                       | 1                | 0                  | Hypothetical protein (1)                                         |                                                                                                                                                                                                                                                             |                                                                                                                                                                                                                                                                                                                                                    |                            | C_umbii_02537_mRNA_3.1 |                       |
| GF0042823 | 0                       | 1                | 0                  | Hypothetical protein (1)                                         |                                                                                                                                                                                                                                                             | Transcription factor GRAS [IPR005202] (1)                                                                                                                                                                                                                                                                                                          |                            | C_umbii_02536_mRNA_6.1 |                       |
| GF0042822 | 0                       | 1                | 0                  | Hypothetical protein (1)                                         |                                                                                                                                                                                                                                                             |                                                                                                                                                                                                                                                                                                                                                    |                            | C_umbii_02535_mRNA_6.1 |                       |
| GF0042821 | 0                       | 1                | 0                  | Hypothetical protein (1)                                         |                                                                                                                                                                                                                                                             |                                                                                                                                                                                                                                                                                                                                                    |                            | C_umbii_02535_mRNA_1.1 |                       |
| GF0042820 | 0                       | 1                | 0                  | Hypothetical protein (1)                                         |                                                                                                                                                                                                                                                             |                                                                                                                                                                                                                                                                                                                                                    |                            | C_umbii_02533_mRNA_2.1 |                       |
| GF0042819 | 0                       | 1                | 0                  | Pentatricopeptide repeat-containing family protein (1)           | protein binding [GO:0005515 molecular_function] (1)                                                                                                                                                                                                         | Pentatricopeptide repeat [IPR028885] (1); Tetra- or pentatricopeptide-like helical domain [IPR011990] (1)                                                                                                                                                                                                                                          |                            | C_umbii_02533_mRNA_1.1 |                       |
| GF0042818 | 0                       | 1                | 0                  | Hypothetical protein (1)                                         | protein dimerization activity [GO:0046983 molecular_function] (1)                                                                                                                                                                                           | Mis-type zinc finger helix-helix (MHLH) domain [IPR011598] (1)                                                                                                                                                                                                                                                                                     |                            | C_umbii_02532_mRNA_4.1 |                       |
| GF0042817 | 0                       | 1                | 0                  | Hypothetical protein (1)                                         |                                                                                                                                                                                                                                                             |                                                                                                                                                                                                                                                                                                                                                    |                            | C_umbii_02532_mRNA_3.1 |                       |
| GF0042816 | 0                       | 1                | 0                  | Carboxypeptidase (1)                                             | proteolysis [GO:0006508 biological_process] (1); serine-type carboxypeptidase activity [GO:0004185 molecular_function] (1)                                                                                                                                  | Serine carboxypeptidases, histidine active site [IPR013124] (1); Peptidase S10, serine carboxypeptidase [IPR001563] (1); Serine carboxypeptidase, serine active site [IPR018202] (1); Alpha/Beta hydrolase fold [IPR029058] (1)                                                                                                                    |                            | C_umbii_02532_mRNA_1.1 |                       |
| GF0042815 | 0                       | 1                | 0                  | Hypothetical protein (1)                                         |                                                                                                                                                                                                                                                             |                                                                                                                                                                                                                                                                                                                                                    |                            | C_umbii_02531_mRNA_2.1 |                       |
| GF0042814 | 0                       | 1                | 0                  | Hypothetical protein (1)                                         |                                                                                                                                                                                                                                                             |                                                                                                                                                                                                                                                                                                                                                    |                            | C_umbii_02529_mRNA_6.1 |                       |
| GF0042813 | 0                       | 1                | 0                  | Purple acid phosphatase 23 (1)                                   | metal ion binding [GO:0046872 molecular_function] (1); acid phosphatase activity [GO:0003993 molecular_function] (1)                                                                                                                                        | Purple acid phosphatase, N-terminal [IPR015914] (1); Purple acid phosphatase-like, N-terminal [IPR008963] (1)                                                                                                                                                                                                                                      |                            | C_umbii_02529_mRNA_1.1 |                       |
| GF0042812 | 0                       | 1                | 0                  | Hypothetical protein (1)                                         |                                                                                                                                                                                                                                                             |                                                                                                                                                                                                                                                                                                                                                    |                            | C_umbii_02527_mRNA_3.1 |                       |
| GF0042811 | 0                       | 1                | 0                  | Hypothetical protein (1)                                         |                                                                                                                                                                                                                                                             |                                                                                                                                                                                                                                                                                                                                                    |                            | C_umbii_02525_mRNA_1.1 |                       |
| GF0042810 | 0                       | 1                | 0                  | Hypothetical protein (1)                                         |                                                                                                                                                                                                                                                             |                                                                                                                                                                                                                                                                                                                                                    |                            | C_umbii_02522_mRNA_1.1 |                       |
| GF0042809 | 0                       | 1                | 0                  | Hypothetical protein (1)                                         |                                                                                                                                                                                                                                                             |                                                                                                                                                                                                                                                                                                                                                    |                            | C_umbii_02514_mRNA_7.1 |                       |
| GF0042808 | 0                       | 1                | 0                  | Hypothetical protein (1)                                         |                                                                                                                                                                                                                                                             |                                                                                                                                                                                                                                                                                                                                                    |                            | C_umbii_02514_mRNA_2.1 |                       |
| GF0042807 | 0                       | 1                | 0                  | Gibberellin 20 oxidase 2 (1)                                     | oxidoreductase activity [GO:0016491 molecular_function] (1); oxidation-reduction process [GO:0055114 biological_process] (1)                                                                                                                                | Oxoglutarate/iron-dependent dioxygenase [IPR005123] (1); Isopeptidase N synthase-like [IPR027443] (1)                                                                                                                                                                                                                                              |                            | C_umbii_02513_mRNA_2.1 |                       |
| GF0042806 | 0                       | 1                | 0                  | Hypothetical protein (1)                                         |                                                                                                                                                                                                                                                             |                                                                                                                                                                                                                                                                                                                                                    |                            | C_umbii_02512_mRNA_1.1 |                       |
| GF0042805 | 0                       | 1                | 0                  | Hypothetical protein (1)                                         |                                                                                                                                                                                                                                                             |                                                                                                                                                                                                                                                                                                                                                    |                            | C_umbii_02511_mRNA_4.1 |                       |
| GF0042804 | 0                       | 1                | 0                  | Hypothetical protein (1)                                         |                                                                                                                                                                                                                                                             |                                                                                                                                                                                                                                                                                                                                                    |                            | C_umbii_02511_mRNA_3.1 |                       |
| GF0042803 | 0                       | 1                | 0                  | Hypothetical protein (1)                                         |                                                                                                                                                                                                                                                             |                                                                                                                                                                                                                                                                                                                                                    |                            | C_umbii_02510_mRNA_3.1 |                       |
| GF0042802 | 0                       | 1                | 0                  | Putative ternary complex factor MIP1 (1)                         |                                                                                                                                                                                                                                                             | Ternary complex factor MIP1, leucine-zipper [IPR025751] (1); Domain of unknown function DUF547 [IPR006669] (1)                                                                                                                                                                                                                                     |                            | C_umbii_02510_mRNA_2.1 |                       |
| GF0042801 | 0                       | 1                | 0                  | Hypothetical protein (1)                                         | protein binding [GO:0005515 molecular_function] (1)                                                                                                                                                                                                         | Tetra- or pentatricopeptide repeat-containing domain [IPR013025] (1); Tetra- or pentatricopeptide repeat [IPR019734] (1)                                                                                                                                                                                                                           |                            | C_umbii_02510_mRNA_1.1 |                       |
| GF0042800 | 0                       | 1                | 0                  | Hypothetical protein (1)                                         |                                                                                                                                                                                                                                                             |                                                                                                                                                                                                                                                                                                                                                    |                            | C_umbii_02509_mRNA_2.1 |                       |
| GF0042799 | 0                       | 1                | 0                  | Putative WRKY transcription factor 15-like protein (1)           |                                                                                                                                                                                                                                                             | Leucine-rich repeat domain, I. domain-like [IPR026751] (1)                                                                                                                                                                                                                                                                                         |                            | C_umbii_02509_mRNA_1.1 |                       |
| GF0042798 | 0                       | 1                | 0                  | Hypothetical protein (1)                                         | protein binding [GO:0005515 molecular_function] (1)                                                                                                                                                                                                         | Leucine-rich repeat [IPR001611] (1); Leucine-rich repeat domain, I. domain-like [IPR026751] (1); Leucine-rich repeat, typical subtype [IPR013591] (1)                                                                                                                                                                                              |                            | C_umbii_02508_mRNA_3.1 |                       |
| GF0042797 | 0                       | 1                | 0                  | Hypothetical protein (1)                                         | protein binding [GO:0005515 molecular_function] (1)                                                                                                                                                                                                         | Leucine-rich repeat [IPR001611] (1); Leucine-rich repeat domain, I. domain-like [IPR026751] (1)                                                                                                                                                                                                                                                    |                            | C_umbii_02508_mRNA_2.1 |                       |
| GF0042796 | 0                       | 1                | 0                  | Hypothetical protein (1)                                         |                                                                                                                                                                                                                                                             |                                                                                                                                                                                                                                                                                                                                                    |                            | C_umbii_02507_mRNA_3.1 |                       |
| GF0042795 | 0                       | 1                | 0                  | Hypothetical protein (1)                                         |                                                                                                                                                                                                                                                             |                                                                                                                                                                                                                                                                                                                                                    |                            | C_umbii_02506_mRNA_5.1 |                       |
| GF0042794 | 0                       | 1                | 0                  | Hypothetical protein (1)                                         |                                                                                                                                                                                                                                                             |                                                                                                                                                                                                                                                                                                                                                    |                            | C_umbii_02506_mRNA_4.1 |                       |
| GF0042793 | 0                       | 1                | 0                  | Hypothetical protein (1)                                         |                                                                                                                                                                                                                                                             |                                                                                                                                                                                                                                                                                                                                                    |                            | C_umbii_02506_mRNA_3.1 |                       |
| GF0042792 | 0                       | 1                | 0                  | X intrinsic protein (1)                                          | transport [GO:0006810 biological_process] (1); membrane [GO:0016020 cellular_component] (1); transporter activity [GO:0005215 molecular_function] (1)                                                                                                       | Aquaporin-like [IPR023271] (1); Major intrinsic protein [IPR000425] (1)                                                                                                                                                                                                                                                                            |                            | C_umbii_02506_mRNA_1.1 |                       |
| GF0042791 | 0                       | 1                | 0                  | Putative serine/threonine-protein kinase NAK (1)                 | ATP binding [GO:0005524 molecular_function] (1); protein phosphorylation [GO:0006468 biological_process] (1); protein kinase activity [GO:0004672 molecular_function] (1)                                                                                   | Protein kinase domain [IPR000719] (1); Protein kinase-like domain [IPR011009] (1)                                                                                                                                                                                                                                                                  |                            | C_umbii_02505_mRNA_2.1 |                       |
| GF0042790 | 0                       | 1                | 0                  | Hypothetical leucine rich repeat protein (1)                     | protein binding [GO:0005515 molecular_function] (1)                                                                                                                                                                                                         | Leucine-rich repeat [IPR001611] (1); Leucine-rich repeat domain, I. domain-like [IPR026751] (1); Leucine-rich repeat, typical subtype [IPR013591] (1)                                                                                                                                                                                              |                            | C_umbii_02504_mRNA_2.1 |                       |

| ID        | Num. in C. crottensteini | Num. in C. auris | Num. in P. putida | Note                                                            | GO                                                                                                                                                                                                                                                                                                                                       | InterPro                                                                                                                                                                                                                                                                                                                                                                                                                                                                                                                                   | Members in C. crottensteini | Members in C. auris    | Members in P. putida |
|-----------|--------------------------|------------------|-------------------|-----------------------------------------------------------------|------------------------------------------------------------------------------------------------------------------------------------------------------------------------------------------------------------------------------------------------------------------------------------------------------------------------------------------|--------------------------------------------------------------------------------------------------------------------------------------------------------------------------------------------------------------------------------------------------------------------------------------------------------------------------------------------------------------------------------------------------------------------------------------------------------------------------------------------------------------------------------------------|-----------------------------|------------------------|----------------------|
| GF0042789 | 0                        | 1                | 0                 | Hypothetical protein (1)                                        | protein binding [GO:0005515 molecular_function] (1)                                                                                                                                                                                                                                                                                      | Penicillin-binding domain [IPR002385] (1); Leucine-rich repeat [IPR016114] (1); Leucine-rich repeat domain, I. domain-like [IPR02675] (1)                                                                                                                                                                                                                                                                                                                                                                                                  | -                           | C_ushii_02504_mRNA_1.1 | -                    |
| GF0042788 | 0                        | 1                | 0                 | Rhamnogalacturonate lyase (1)                                   | carbohydrate metabolic process [GO:0005975 biological_process] (1); catalytic activity [GO:0003824 molecular_function] (1); carbohydrate binding [GO:0030246 molecular_function] (1)                                                                                                                                                     | Rhamnogalacturonate lyase [IPR010252] (1); Rhamnogalacturonase base, domain III [IPR020814] (1); Galactose mannanase-like domain [IPR011013] (1); Galactose-binding domain-like [IPR008979] (1)                                                                                                                                                                                                                                                                                                                                            | -                           | C_ushii_02503_mRNA_1.1 | -                    |
| GF0042787 | 0                        | 1                | 0                 | Hypothetical protein (1)                                        | -                                                                                                                                                                                                                                                                                                                                        | Domains of unknown function DUF4371 [IPR025398] (4)                                                                                                                                                                                                                                                                                                                                                                                                                                                                                        | -                           | C_ushii_02502_mRNA_1.1 | -                    |
| GF0042786 | 0                        | 1                | 0                 | Hypothetical protein (1)                                        | protein kinase activity [GO:0004672 molecular_function] (1); protein phosphorylation [GO:0006468 biological_process] (1); ATP binding [GO:0005524 molecular_function] (1)                                                                                                                                                                | Protein kinase, ATP binding site [IPR017441] (1); Bulb-type lectin domain [IPR001480] (1); Protein kinase domain [IPR001915] (1); Concanavalin A-like lectin/galactanase domain [IPR013320] (1); Protein kinase-like domain [IPR011009] (1)                                                                                                                                                                                                                                                                                                | -                           | C_ushii_02499_mRNA_2.1 | -                    |
| GF0042785 | 0                        | 1                | 0                 | Hypothetical protein (1)                                        | -                                                                                                                                                                                                                                                                                                                                        | -                                                                                                                                                                                                                                                                                                                                                                                                                                                                                                                                          | -                           | C_ushii_02498_mRNA_2.1 | -                    |
| GF0042784 | 0                        | 1                | 0                 | Hypothetical protein (1)                                        | -                                                                                                                                                                                                                                                                                                                                        | -                                                                                                                                                                                                                                                                                                                                                                                                                                                                                                                                          | -                           | C_ushii_02498_mRNA_1.1 | -                    |
| GF0042783 | 0                        | 1                | 0                 | Hypothetical protein (1)                                        | -                                                                                                                                                                                                                                                                                                                                        | -                                                                                                                                                                                                                                                                                                                                                                                                                                                                                                                                          | -                           | C_ushii_02497_mRNA_1.1 | -                    |
| GF0042782 | 0                        | 1                | 0                 | Glucose-6-phosphate 1-dehydrogenase, cytoplasmic isoform (1)    | glucose metabolic process [GO:0006006 biological_process] (1); oxidation-reduction process [GO:0055114 biological_process] (1); glucose-6-phosphate dehydrogenase activity [GO:0004345 molecular_function] (1); NADP binding [GO:0050661 molecular_function] (1)                                                                         | Glucose-6-phosphate dehydrogenase [IPR001282] (1); NAD(P)-binding domain [IPR016440] (1); Glucose-6-phosphate dehydrogenase, C-terminal [IPR02675] (1); Glucose-6-phosphate dehydrogenase, NAD-binding [IPR022674] (4)                                                                                                                                                                                                                                                                                                                     | -                           | C_ushii_02495_mRNA_3.1 | -                    |
| GF0042781 | 0                        | 1                | 0                 | NB-ARC domain disease resistance protein (1)                    | ADP binding [GO:0004351 molecular_function] (1)                                                                                                                                                                                                                                                                                          | P-loop containing nucleoside triphosphate hydrolase [IPR027471] (1); NB-ARC [IPR02182] (1); Leucine-rich repeat domain, I. domain-like [IPR032875] (1)                                                                                                                                                                                                                                                                                                                                                                                     | -                           | C_ushii_02495_mRNA_1.1 | -                    |
| GF0042780 | 0                        | 1                | 0                 | Hypothetical protein (1)                                        | -                                                                                                                                                                                                                                                                                                                                        | -                                                                                                                                                                                                                                                                                                                                                                                                                                                                                                                                          | -                           | C_ushii_02494_mRNA_2.1 | -                    |
| GF0042779 | 0                        | 1                | 0                 | Hypothetical protein (1)                                        | -                                                                                                                                                                                                                                                                                                                                        | -                                                                                                                                                                                                                                                                                                                                                                                                                                                                                                                                          | -                           | C_ushii_02493_mRNA_3.1 | -                    |
| GF0042778 | 0                        | 1                | 0                 | Hypothetical protein (1)                                        | -                                                                                                                                                                                                                                                                                                                                        | -                                                                                                                                                                                                                                                                                                                                                                                                                                                                                                                                          | -                           | C_ushii_02493_mRNA_2.1 | -                    |
| GF0042777 | 0                        | 1                | 0                 | Hypothetical protein (1)                                        | -                                                                                                                                                                                                                                                                                                                                        | -                                                                                                                                                                                                                                                                                                                                                                                                                                                                                                                                          | -                           | C_ushii_02492_mRNA_2.1 | -                    |
| GF0042776 | 0                        | 1                | 0                 | Hypothetical protein (1)                                        | -                                                                                                                                                                                                                                                                                                                                        | -                                                                                                                                                                                                                                                                                                                                                                                                                                                                                                                                          | -                           | C_ushii_02491_mRNA_1.1 | -                    |
| GF0042775 | 0                        | 1                | 0                 | Hypothetical protein (1)                                        | -                                                                                                                                                                                                                                                                                                                                        | Fadomycin/crotonylase/phosphatase [IPR008135] (1)                                                                                                                                                                                                                                                                                                                                                                                                                                                                                          | -                           | C_ushii_02490_mRNA_1.1 | -                    |
| GF0042774 | 0                        | 1                | 0                 | Hypothetical protein (1)                                        | ribosome [GO:0005840 cellular_component] (1); oxidoreductase activity [GO:0016491 molecular_function] (1); metabolic process [GO:0008152 biological_process] (1); translation [GO:0006412 biological_process] (1); structural constituent of ribosome [GO:0003735 molecular_function] (1)                                                | Ribosomal protein S5 domain 2-type fold [IPR001668] (1); Ribosomal protein S9 [IPR000754] (1); NAD(P)-binding domain [IPR016440] (1); Short-chain alcohol dehydrogenase/short-chain SDR [IPR02198] (1); Glucose/ribose dehydrogenase [IPR022471] (1); Ribosomal protein S5 domain 2-type fold, subgroup [IPR014721] (4)                                                                                                                                                                                                                    | -                           | C_ushii_02489_mRNA_5.1 | -                    |
| GF0042773 | 0                        | 1                | 0                 | Hypothetical protein (1)                                        | -                                                                                                                                                                                                                                                                                                                                        | DNA-binding pseudobulbar domain [IPR015300] (1)                                                                                                                                                                                                                                                                                                                                                                                                                                                                                            | -                           | C_ushii_02489_mRNA_4.1 | -                    |
| GF0042772 | 0                        | 1                | 0                 | Hypothetical protein (1)                                        | -                                                                                                                                                                                                                                                                                                                                        | -                                                                                                                                                                                                                                                                                                                                                                                                                                                                                                                                          | -                           | C_ushii_02489_mRNA_3.1 | -                    |
| GF0042771 | 0                        | 1                | 0                 | Hypothetical protein (1)                                        | -                                                                                                                                                                                                                                                                                                                                        | -                                                                                                                                                                                                                                                                                                                                                                                                                                                                                                                                          | -                           | C_ushii_02488_mRNA_2.1 | -                    |
| GF0042770 | 0                        | 1                | 0                 | Hypothetical protein (1)                                        | protein binding [GO:0005515 molecular_function] (1); signal transduction [GO:0007165 biological_process] (1); ADP binding [GO:0004351 molecular_function] (1); ATP binding [GO:0005524 molecular_function] (1); protein phosphorylation [GO:0006468 biological_process] (1); protein kinase activity [GO:0004672 molecular_function] (1) | NB-ARC [IPR02182] (1); Serine/threonine/tyrosine specificity protein kinase, catalytic domain [IPR002290] (1); P-loop containing nucleoside triphosphate hydrolase [IPR027471] (1); Protein kinase, ATP binding site [IPR017441] (1); Serine/threonine-protein kinase, active site [IPR008271] (1); Protein kinase-like domain [IPR02675] (1); Protein kinase-like domain [IPR011009] (1); Leucine-rich repeat 2 [IPR011713] (1); Protein kinase domain [IPR000719] (1); Toll-interleukin-1 receptor homology (TIR) domain [IPR001571] (1) | -                           | C_ushii_02488_mRNA_1.1 | -                    |
| GF0042769 | 0                        | 1                | 0                 | Hypothetical protein (1)                                        | oxidoreductase activity [GO:0016491 molecular_function] (1); metabolic process [GO:0008152 biological_process] (1)                                                                                                                                                                                                                       | Short-chain dehydrogenase/reductase SDR [IPR02198] (1); NAD(P)-binding domain [IPR016440] (1)                                                                                                                                                                                                                                                                                                                                                                                                                                              | -                           | C_ushii_02487_mRNA_3.1 | -                    |
| GF0042768 | 0                        | 1                | 0                 | LRR receptor-like kinase family protein (1)                     | protein binding [GO:0005515 molecular_function] (1)                                                                                                                                                                                                                                                                                      | Leucine-rich repeat [IPR016114] (1); Leucine-rich repeat, typical subtype [IPR035911] (1); Leucine-rich repeat domain, I. domain-like [IPR032675] (1)                                                                                                                                                                                                                                                                                                                                                                                      | -                           | C_ushii_02485_mRNA_3.1 | -                    |
| GF0042767 | 0                        | 1                | 0                 | Hypothetical protein (1)                                        | protein binding [GO:0005515 molecular_function] (1); signal transduction [GO:0007165 biological_process] (1); ADP binding [GO:0004351 molecular_function] (1)                                                                                                                                                                            | Toll-interleukin-1 receptor homology (TIR) domain [IPR001571] (1); Winged helix-helix DNA-binding domain [IPR01191] (1); P-loop containing nucleoside triphosphate hydrolase [IPR027471] (1); NB-ARC [IPR02182] (1)                                                                                                                                                                                                                                                                                                                        | -                           | C_ushii_02484_mRNA_1.1 | -                    |
| GF0042766 | 0                        | 1                | 0                 | Hypothetical protein (1)                                        | -                                                                                                                                                                                                                                                                                                                                        | TR2/DP1/HVA22-related protein [IPR004343] (1); Reverse transcriptase domain [IPR006877] (1)                                                                                                                                                                                                                                                                                                                                                                                                                                                | -                           | C_ushii_02483_mRNA_3.1 | -                    |
| GF0042765 | 0                        | 1                | 0                 | Hypothetical protein (1)                                        | -                                                                                                                                                                                                                                                                                                                                        | -                                                                                                                                                                                                                                                                                                                                                                                                                                                                                                                                          | -                           | C_ushii_02482_mRNA_3.1 | -                    |
| GF0042764 | 0                        | 1                | 0                 | Hypothetical protein (1)                                        | -                                                                                                                                                                                                                                                                                                                                        | -                                                                                                                                                                                                                                                                                                                                                                                                                                                                                                                                          | -                           | C_ushii_02482_mRNA_2.1 | -                    |
| GF0042763 | 0                        | 1                | 0                 | Hypothetical protein (1)                                        | -                                                                                                                                                                                                                                                                                                                                        | -                                                                                                                                                                                                                                                                                                                                                                                                                                                                                                                                          | -                           | C_ushii_02481_mRNA_4.1 | -                    |
| GF0042762 | 0                        | 1                | 0                 | Hypothetical protein (1)                                        | -                                                                                                                                                                                                                                                                                                                                        | Leucine-rich repeat domain, I. domain-like [IPR032675] (1)                                                                                                                                                                                                                                                                                                                                                                                                                                                                                 | -                           | C_ushii_02481_mRNA_2.1 | -                    |
| GF0042761 | 0                        | 1                | 0                 | Hypothetical protein (1)                                        | protein phosphorylation [GO:0006468 biological_process] (1); protein kinase activity [GO:0004672 molecular_function] (1); ATP binding [GO:0005524 molecular_function] (1)                                                                                                                                                                | Protein kinase-like domain [IPR011009] (1); Protein kinase domain [IPR000719] (1); Serine/threonine/tyrosine specificity protein kinase, catalytic domain [IPR002290] (1); Serine/threonine-protein kinase, active site [IPR008271] (1)                                                                                                                                                                                                                                                                                                    | -                           | C_ushii_02480_mRNA_3.1 | -                    |
| GF0042760 | 0                        | 1                | 0                 | Hypothetical protein (1)                                        | -                                                                                                                                                                                                                                                                                                                                        | -                                                                                                                                                                                                                                                                                                                                                                                                                                                                                                                                          | -                           | C_ushii_02479_mRNA_2.1 | -                    |
| GF0042759 | 0                        | 1                | 0                 | Hypothetical protein (1)                                        | -                                                                                                                                                                                                                                                                                                                                        | -                                                                                                                                                                                                                                                                                                                                                                                                                                                                                                                                          | -                           | C_ushii_02479_mRNA_1.1 | -                    |
| GF0042758 | 0                        | 1                | 0                 | Hypothetical protein (1)                                        | -                                                                                                                                                                                                                                                                                                                                        | -                                                                                                                                                                                                                                                                                                                                                                                                                                                                                                                                          | -                           | C_ushii_02476_mRNA_1.1 | -                    |
| GF0042757 | 0                        | 1                | 0                 | Hypothetical protein (1)                                        | -                                                                                                                                                                                                                                                                                                                                        | -                                                                                                                                                                                                                                                                                                                                                                                                                                                                                                                                          | -                           | C_ushii_02475_mRNA_2.1 | -                    |
| GF0042756 | 0                        | 1                | 0                 | Hypothetical protein (1)                                        | -                                                                                                                                                                                                                                                                                                                                        | -                                                                                                                                                                                                                                                                                                                                                                                                                                                                                                                                          | -                           | C_ushii_02474_mRNA_3.1 | -                    |
| GF0042755 | 0                        | 1                | 0                 | 17.5 kDa class I heat shock protein (1)                         | -                                                                                                                                                                                                                                                                                                                                        | Small heat shock protein HSP20 [IPR011071] (1); Alpha crystallin/Hsp20 domain [IPR002068] (1); HSP20-like chaperone [IPR00879] (4)                                                                                                                                                                                                                                                                                                                                                                                                         | -                           | C_ushii_02473_mRNA_1.1 | -                    |
| GF0042754 | 0                        | 1                | 0                 | Hypothetical protein (1)                                        | -                                                                                                                                                                                                                                                                                                                                        | -                                                                                                                                                                                                                                                                                                                                                                                                                                                                                                                                          | -                           | C_ushii_02472_mRNA_1.1 | -                    |
| GF0042753 | 0                        | 1                | 0                 | Hypothetical protein (1)                                        | -                                                                                                                                                                                                                                                                                                                                        | Leucine-rich repeat domain, I. domain-like [IPR032675] (1)                                                                                                                                                                                                                                                                                                                                                                                                                                                                                 | -                           | C_ushii_02471_mRNA_2.1 | -                    |
| GF0042752 | 0                        | 1                | 0                 | Hypothetical protein (1)                                        | -                                                                                                                                                                                                                                                                                                                                        | -                                                                                                                                                                                                                                                                                                                                                                                                                                                                                                                                          | -                           | C_ushii_02471_mRNA_1.1 | -                    |
| GF0042751 | 0                        | 1                | 0                 | Hypothetical protein (1)                                        | -                                                                                                                                                                                                                                                                                                                                        | -                                                                                                                                                                                                                                                                                                                                                                                                                                                                                                                                          | -                           | C_ushii_02470_mRNA_1.1 | -                    |
| GF0042750 | 0                        | 1                | 0                 | Chitinase (1)                                                   | chain catabolic process [GO:0006032 biological_process] (1); chitinase activity [GO:0004568 molecular_function] (1); carbohydrate metabolic process [GO:0005975 biological_process] (1); chain binding [GO:0008061 molecular_function] (1); cell wall macromolecule catabolic process [GO:0016998 biological_process] (1)                | Chain-binding, type 1, conserved site [IPR018371] (1); Chain-binding, type 1 [IPR01002] (1); Glycoside hydrolase, family 19 [IPR028213] (1); Lysozyme-like domain [IPR023340] (1); Glycoside hydrolase, family 19, catalytic [IPR007291] (1)                                                                                                                                                                                                                                                                                               | -                           | C_ushii_02466_mRNA_3.1 | -                    |
| GF0042749 | 0                        | 1                | 0                 | Hypothetical protein (1)                                        | -                                                                                                                                                                                                                                                                                                                                        | Protein of unknown function DUF241, plant [IPR004320] (1)                                                                                                                                                                                                                                                                                                                                                                                                                                                                                  | -                           | C_ushii_02466_mRNA_1.1 | -                    |
| GF0042748 | 0                        | 1                | 0                 | Hypothetical protein (1)                                        | -                                                                                                                                                                                                                                                                                                                                        | -                                                                                                                                                                                                                                                                                                                                                                                                                                                                                                                                          | -                           | C_ushii_02465_mRNA_4.1 | -                    |
| GF0042747 | 0                        | 1                | 0                 | Hypothetical protein (1)                                        | -                                                                                                                                                                                                                                                                                                                                        | -                                                                                                                                                                                                                                                                                                                                                                                                                                                                                                                                          | -                           | C_ushii_02464_mRNA_2.1 | -                    |
| GF0042746 | 0                        | 1                | 0                 | Hypothetical protein (1)                                        | -                                                                                                                                                                                                                                                                                                                                        | LysoM domain [IPR011592] (1)                                                                                                                                                                                                                                                                                                                                                                                                                                                                                                               | -                           | C_ushii_02463_mRNA_3.1 | -                    |
| GF0042745 | 0                        | 1                | 0                 | Hypothetical protein (1)                                        | -                                                                                                                                                                                                                                                                                                                                        | LysoM domain [IPR011592] (1)                                                                                                                                                                                                                                                                                                                                                                                                                                                                                                               | -                           | C_ushii_02463_mRNA_1.1 | -                    |
| GF0042744 | 0                        | 1                | 0                 | Leucine-rich repeat protein kinase family protein, putative (1) | ATP binding [GO:0005524 molecular_function] (1); protein kinase activity [GO:0004672 molecular_function] (1); protein phosphorylation [GO:0006468 biological_process] (1)                                                                                                                                                                | Protein kinase domain [IPR002199] (3); Serine/threonine/tyrosine specificity protein kinase, catalytic domain [IPR002290] (1); Serine/threonine-protein kinase, active site [IPR008271] (1); Protein kinase, ATP binding site [IPR017441] (1); Serine/threonine/tyrosine-protein kinase catalytic domain [IPR001245] (1)                                                                                                                                                                                                                   | -                           | C_ushii_02462_mRNA_1.1 | -                    |
| GF0042743 | 0                        | 1                | 0                 | Hypothetical protein (1)                                        | -                                                                                                                                                                                                                                                                                                                                        | -                                                                                                                                                                                                                                                                                                                                                                                                                                                                                                                                          | -                           | C_ushii_02461_mRNA_2.1 | -                    |
| GF0042742 | 0                        | 1                | 0                 | Hypothetical protein (1)                                        | nucleic acid binding [GO:0003676 molecular_function] (1); zinc ion binding [GO:0008270 molecular_function] (1)                                                                                                                                                                                                                           | Zinc finger, CCHC-type [IPR018178] (1); Zinc knuckle C2XC4HEXC [IPR025836] (4)                                                                                                                                                                                                                                                                                                                                                                                                                                                             | -                           | C_ushii_02461_mRNA_1.1 | -                    |
| GF0042741 | 0                        | 1                | 0                 | Hypothetical protein (1)                                        | -                                                                                                                                                                                                                                                                                                                                        | -                                                                                                                                                                                                                                                                                                                                                                                                                                                                                                                                          | -                           | C_ushii_02460_mRNA_3.1 | -                    |
| GF0042740 | 0                        | 1                | 0                 | Putative ACY transposase (1)                                    | DNA binding [GO:0003677 molecular_function] (1); nucleic acid binding [GO:0003676 molecular_function] (1); protein dimerization activity [GO:0046983 molecular_function] (1)                                                                                                                                                             | Ribonuclease H-like domain [IPR012337] (1); Zinc finger, HEI2-type [IPR003056] (1); HAT, C-terminal dimerization domain [IPR008906] (4)                                                                                                                                                                                                                                                                                                                                                                                                    | -                           | C_ushii_02458_mRNA_2.1 | -                    |
| GF0042739 | 0                        | 1                | 0                 | Hypothetical protein (1)                                        | -                                                                                                                                                                                                                                                                                                                                        | -                                                                                                                                                                                                                                                                                                                                                                                                                                                                                                                                          | -                           | C_ushii_02457_mRNA_3.1 | -                    |
| GF0042738 | 0                        | 1                | 0                 | Hypothetical protein (1)                                        | -                                                                                                                                                                                                                                                                                                                                        | -                                                                                                                                                                                                                                                                                                                                                                                                                                                                                                                                          | -                           | C_ushii_02454_mRNA_1.1 | -                    |
| GF0042737 | 0                        | 1                | 0                 | Hypothetical protein (1)                                        | -                                                                                                                                                                                                                                                                                                                                        | -                                                                                                                                                                                                                                                                                                                                                                                                                                                                                                                                          | -                           | C_ushii_02453_mRNA_4.1 | -                    |
| GF0042736 | 0                        | 1                | 0                 | Hypothetical protein (1)                                        | -                                                                                                                                                                                                                                                                                                                                        | -                                                                                                                                                                                                                                                                                                                                                                                                                                                                                                                                          | -                           | C_ushii_02452_mRNA_3.1 | -                    |
| GF0042735 | 0                        | 1                | 0                 | Hypothetical protein (1)                                        | regulation of transcription, DNA-templated [GO:0006355 biological_process] (1)                                                                                                                                                                                                                                                           | YEATS [IPR005033] (1)                                                                                                                                                                                                                                                                                                                                                                                                                                                                                                                      | -                           | C_ushii_02449_mRNA_3.1 | -                    |
| GF0042734 | 0                        | 1                | 0                 | Hypothetical protein (1)                                        | -                                                                                                                                                                                                                                                                                                                                        | -                                                                                                                                                                                                                                                                                                                                                                                                                                                                                                                                          | -                           | C_ushii_02448_mRNA_4.1 | -                    |
| GF0042733 | 0                        | 1                | 0                 | Hypothetical protein (1)                                        | -                                                                                                                                                                                                                                                                                                                                        | -                                                                                                                                                                                                                                                                                                                                                                                                                                                                                                                                          | -                           | C_ushii_02448_mRNA_3.1 | -                    |
| GF0042732 | 0                        | 1                | 0                 | Hypothetical protein (1)                                        | -                                                                                                                                                                                                                                                                                                                                        | Ribosomal protein L2 domain 2 [IPR014722] (4)                                                                                                                                                                                                                                                                                                                                                                                                                                                                                              | -                           | C_ushii_02448_mRNA_2.1 | -                    |
| GF0042731 | 0                        | 1                | 0                 | Hypothetical protein (1)                                        | -                                                                                                                                                                                                                                                                                                                                        | -                                                                                                                                                                                                                                                                                                                                                                                                                                                                                                                                          | -                           | C_ushii_02447_mRNA_1.1 | -                    |
| GF0042730 | 0                        | 1                | 0                 | Hypothetical protein (1)                                        | -                                                                                                                                                                                                                                                                                                                                        | ReaC-like jelly-roll fold [IPR014710] (1)                                                                                                                                                                                                                                                                                                                                                                                                                                                                                                  | -                           | C_ushii_02446_mRNA_6.1 | -                    |
| GF0042729 | 0                        | 1                | 0                 | Hypothetical protein (1)                                        | -                                                                                                                                                                                                                                                                                                                                        | -                                                                                                                                                                                                                                                                                                                                                                                                                                                                                                                                          | -                           | C_ushii_02446_mRNA_4.1 | -                    |
| GF0042728 | 0                        | 1                | 0                 | Hypothetical protein (1)                                        | -                                                                                                                                                                                                                                                                                                                                        | -                                                                                                                                                                                                                                                                                                                                                                                                                                                                                                                                          | -                           | C_ushii_02446_mRNA_3.1 | -                    |



| ID        | Num. in <i>C. crotchi</i> | Num. in <i>C. auris</i> | Num. in <i>P. putida</i> | Note                                                                                              | GO                                                                                                                                                                                                                                                                                                                                                                                                 | InterPro                                                                                                                                                                                                                                                                                                                                                                                                                                                                                                                                    | Members in <i>C. crotchi</i> | Members in <i>C. auris</i> | Members in <i>P. putida</i> |
|-----------|---------------------------|-------------------------|--------------------------|---------------------------------------------------------------------------------------------------|----------------------------------------------------------------------------------------------------------------------------------------------------------------------------------------------------------------------------------------------------------------------------------------------------------------------------------------------------------------------------------------------------|---------------------------------------------------------------------------------------------------------------------------------------------------------------------------------------------------------------------------------------------------------------------------------------------------------------------------------------------------------------------------------------------------------------------------------------------------------------------------------------------------------------------------------------------|------------------------------|----------------------------|-----------------------------|
| GF0042727 | 0                         | 1                       | 0                        | Hypothetical protein (1)                                                                          |                                                                                                                                                                                                                                                                                                                                                                                                    |                                                                                                                                                                                                                                                                                                                                                                                                                                                                                                                                             |                              | C_unihh_02446_mRNA_2,1     | -                           |
| GF0042726 | 0                         | 1                       | 0                        | RNA-directed DNA polymerase (Reverse transcriptase) (1)                                           |                                                                                                                                                                                                                                                                                                                                                                                                    | Reverse transcriptase domain [IPR004771] (1)                                                                                                                                                                                                                                                                                                                                                                                                                                                                                                |                              | C_unihh_02446_mRNA_1,1     | -                           |
| GF0042725 | 0                         | 1                       | 0                        | Hypothetical protein (1)                                                                          |                                                                                                                                                                                                                                                                                                                                                                                                    |                                                                                                                                                                                                                                                                                                                                                                                                                                                                                                                                             |                              | C_unihh_02445_mRNA_6,1     | -                           |
| GF0042724 | 0                         | 1                       | 0                        | Hypothetical protein (1)                                                                          |                                                                                                                                                                                                                                                                                                                                                                                                    |                                                                                                                                                                                                                                                                                                                                                                                                                                                                                                                                             |                              | C_unihh_02445_mRNA_5,1     | -                           |
| GF0042723 | 0                         | 1                       | 0                        | Hypothetical protein (1)                                                                          |                                                                                                                                                                                                                                                                                                                                                                                                    |                                                                                                                                                                                                                                                                                                                                                                                                                                                                                                                                             |                              | C_unihh_02445_mRNA_2,1     | -                           |
| GF0042722 | 0                         | 1                       | 0                        | Hypothetical protein (1)                                                                          |                                                                                                                                                                                                                                                                                                                                                                                                    |                                                                                                                                                                                                                                                                                                                                                                                                                                                                                                                                             |                              | C_unihh_02441_mRNA_5,1     | -                           |
| GF0042721 | 0                         | 1                       | 0                        | Hypothetical protein (1)                                                                          |                                                                                                                                                                                                                                                                                                                                                                                                    |                                                                                                                                                                                                                                                                                                                                                                                                                                                                                                                                             |                              | C_unihh_02441_mRNA_4,1     | -                           |
| GF0042720 | 0                         | 1                       | 0                        | Hypothetical protein (1)                                                                          | nucleic acid binding [GO:0003676 molecular_function] (1); ATP binding [GO:000524 molecular_function] (1)                                                                                                                                                                                                                                                                                           | DEAD/DEAH box helicase domain [IPR015451] (1); P-loop containing nucleoside triphosphate hydrolyase [IPR027411] (1); Helicase superfamily 1.2: ATP-binding domain [IPR014001] (1)                                                                                                                                                                                                                                                                                                                                                           |                              | C_unihh_02441_mRNA_2,1     | -                           |
| GF0042719 | 0                         | 1                       | 0                        | Hypothetical protein (1)                                                                          |                                                                                                                                                                                                                                                                                                                                                                                                    |                                                                                                                                                                                                                                                                                                                                                                                                                                                                                                                                             |                              | C_unihh_02440_mRNA_1,1     | -                           |
| GF0042718 | 0                         | 1                       | 0                        | Hypothetical protein (1)                                                                          |                                                                                                                                                                                                                                                                                                                                                                                                    |                                                                                                                                                                                                                                                                                                                                                                                                                                                                                                                                             |                              | C_unihh_02439_mRNA_2,1     | -                           |
| GF0042717 | 0                         | 1                       | 0                        | Hypothetical protein (1)                                                                          |                                                                                                                                                                                                                                                                                                                                                                                                    |                                                                                                                                                                                                                                                                                                                                                                                                                                                                                                                                             |                              | C_unihh_02439_mRNA_1,1     | -                           |
| GF0042716 | 0                         | 1                       | 0                        | Mosses/bark transport protein (1)                                                                 |                                                                                                                                                                                                                                                                                                                                                                                                    |                                                                                                                                                                                                                                                                                                                                                                                                                                                                                                                                             |                              | C_unihh_02438_mRNA_4,1     | -                           |
| GF0042715 | 0                         | 1                       | 0                        | Hypothetical protein (1)                                                                          |                                                                                                                                                                                                                                                                                                                                                                                                    |                                                                                                                                                                                                                                                                                                                                                                                                                                                                                                                                             |                              | C_unihh_02438_mRNA_2,1     | -                           |
| GF0042714 | 0                         | 1                       | 0                        | Hypothetical protein (1)                                                                          |                                                                                                                                                                                                                                                                                                                                                                                                    |                                                                                                                                                                                                                                                                                                                                                                                                                                                                                                                                             |                              | C_unihh_02436_mRNA_1,1     | -                           |
| GF0042713 | 0                         | 1                       | 0                        | Hypothetical protein (1)                                                                          |                                                                                                                                                                                                                                                                                                                                                                                                    |                                                                                                                                                                                                                                                                                                                                                                                                                                                                                                                                             |                              | C_unihh_02435_mRNA_3,1     | -                           |
| GF0042712 | 0                         | 1                       | 0                        | Hypothetical protein (1)                                                                          |                                                                                                                                                                                                                                                                                                                                                                                                    |                                                                                                                                                                                                                                                                                                                                                                                                                                                                                                                                             |                              | C_unihh_02434_mRNA_1,1     | -                           |
| GF0042711 | 0                         | 1                       | 0                        | Hypothetical protein (1)                                                                          | protein serine/threonine phosphatase activity [GO:0004722 molecular_function] (1); protein dephosphorylation [GO:0006470 biological_process] (1); cation binding [GO:0043169 molecular_function] (1); catalytic activity [GO:0003824 molecular_function] (1)                                                                                                                                       | Protein phosphatase 2C family [IPR015655] (1); PPM-type phosphatase domain [IPR001932] (1); PPM-type phosphatase, divergent cation binding [IPR000222] (1)                                                                                                                                                                                                                                                                                                                                                                                  |                              | C_unihh_02433_mRNA_4,1     | -                           |
| GF0042710 | 0                         | 1                       | 0                        | Hypothetical protein (1)                                                                          |                                                                                                                                                                                                                                                                                                                                                                                                    |                                                                                                                                                                                                                                                                                                                                                                                                                                                                                                                                             |                              | C_unihh_02433_mRNA_2,1     | -                           |
| GF0042709 | 0                         | 1                       | 0                        | Hypothetical protein (1)                                                                          |                                                                                                                                                                                                                                                                                                                                                                                                    |                                                                                                                                                                                                                                                                                                                                                                                                                                                                                                                                             |                              | C_unihh_02432_mRNA_4,1     | -                           |
| GF0042708 | 0                         | 1                       | 0                        | Hypothetical protein (1)                                                                          |                                                                                                                                                                                                                                                                                                                                                                                                    |                                                                                                                                                                                                                                                                                                                                                                                                                                                                                                                                             |                              | C_unihh_02432_mRNA_2,1     | -                           |
| GF0042707 | 0                         | 1                       | 0                        | Hypothetical protein (1)                                                                          |                                                                                                                                                                                                                                                                                                                                                                                                    |                                                                                                                                                                                                                                                                                                                                                                                                                                                                                                                                             |                              | C_unihh_02431_mRNA_1,1     | -                           |
| GF0042706 | 0                         | 1                       | 0                        | Hypothetical protein (1)                                                                          |                                                                                                                                                                                                                                                                                                                                                                                                    |                                                                                                                                                                                                                                                                                                                                                                                                                                                                                                                                             |                              | C_unihh_02430_mRNA_3,1     | -                           |
| GF0042705 | 0                         | 1                       | 0                        | Hypothetical protein (1)                                                                          | O-methyltransferase activity [GO:0008171 molecular_function] (1)                                                                                                                                                                                                                                                                                                                                   | S-adenosyl-L-methionine-dependent methyltransferase [IPR029631] (1); O-methyltransferase, family 3 [IPR002953] (1)                                                                                                                                                                                                                                                                                                                                                                                                                          |                              | C_unihh_02430_mRNA_2,1     | -                           |
| GF0042704 | 0                         | 1                       | 0                        | Hypothetical protein (1)                                                                          |                                                                                                                                                                                                                                                                                                                                                                                                    |                                                                                                                                                                                                                                                                                                                                                                                                                                                                                                                                             |                              | C_unihh_02429_mRNA_3,1     | -                           |
| GF0042703 | 0                         | 1                       | 0                        | Hypothetical protein (1)                                                                          |                                                                                                                                                                                                                                                                                                                                                                                                    |                                                                                                                                                                                                                                                                                                                                                                                                                                                                                                                                             |                              | C_unihh_02429_mRNA_1,1     | -                           |
| GF0042702 | 0                         | 1                       | 0                        | Hypothetical protein (1)                                                                          |                                                                                                                                                                                                                                                                                                                                                                                                    |                                                                                                                                                                                                                                                                                                                                                                                                                                                                                                                                             |                              | C_unihh_02427_mRNA_1,1     | -                           |
| GF0042701 | 0                         | 1                       | 0                        | Hypothetical protein (1)                                                                          |                                                                                                                                                                                                                                                                                                                                                                                                    |                                                                                                                                                                                                                                                                                                                                                                                                                                                                                                                                             |                              | C_unihh_02426_mRNA_3,1     | -                           |
| GF0042700 | 0                         | 1                       | 0                        | Hypothetical protein (1)                                                                          |                                                                                                                                                                                                                                                                                                                                                                                                    |                                                                                                                                                                                                                                                                                                                                                                                                                                                                                                                                             |                              | C_unihh_02425_mRNA_4,1     | -                           |
| GF0042699 | 0                         | 1                       | 0                        | Hypothetical protein (1)                                                                          |                                                                                                                                                                                                                                                                                                                                                                                                    |                                                                                                                                                                                                                                                                                                                                                                                                                                                                                                                                             |                              | C_unihh_02425_mRNA_3,1     | -                           |
| GF0042698 | 0                         | 1                       | 0                        | Hypothetical protein (1)                                                                          | integral component of membrane [GO:0016021 cellular_component] (1); cholesterol delta-isomerase activity [GO:004759 molecular_function] (1); steroid metabolic process [GO:0016125 biological_process] (1)                                                                                                                                                                                         | Enopamil-binding protein [IPR007905] (1)                                                                                                                                                                                                                                                                                                                                                                                                                                                                                                    |                              | C_unihh_02425_mRNA_2,1     | -                           |
| GF0042697 | 0                         | 1                       | 0                        | Hypothetical protein (1)                                                                          |                                                                                                                                                                                                                                                                                                                                                                                                    |                                                                                                                                                                                                                                                                                                                                                                                                                                                                                                                                             |                              | C_unihh_02425_mRNA_1,1     | -                           |
| GF0042696 | 0                         | 1                       | 0                        | Hypothetical protein (1)                                                                          |                                                                                                                                                                                                                                                                                                                                                                                                    |                                                                                                                                                                                                                                                                                                                                                                                                                                                                                                                                             |                              | C_unihh_02424_mRNA_1,1     | -                           |
| GF0042695 | 0                         | 1                       | 0                        | Hypothetical protein (1)                                                                          | protein binding [GO:0005515 molecular_function] (1)                                                                                                                                                                                                                                                                                                                                                | WD40 repeat-containing domain [IPR017980] (1); WD40 repeat [IPR016803] (1); WD40/YVTN repeat-like-containing domain [IPR015943] (1); WD40 repeat, conserved site [IPR019757] (1)                                                                                                                                                                                                                                                                                                                                                            |                              | C_unihh_02422_mRNA_2,1     | -                           |
| GF0042694 | 0                         | 1                       | 0                        | Hypothetical protein (1)                                                                          |                                                                                                                                                                                                                                                                                                                                                                                                    |                                                                                                                                                                                                                                                                                                                                                                                                                                                                                                                                             |                              | C_unihh_02421_mRNA_4,1     | -                           |
| GF0042693 | 0                         | 1                       | 0                        | Hypothetical protein (1)                                                                          | zinc ion binding [GO:0008270 molecular_function] (1); calcium ion binding [GO:0005509 molecular_function] (1); nucleic acid activity [GO:0006218 molecular_function] (1); DNA repair [GO:0000628 biological_process] (1); ATP binding [GO:000524 molecular_function] (1); protein phosphorylation [GO:0006468 biological_process] (1); protein kinase activity [GO:0004672 molecular_function] (1) | Serine/threonine/dual specificity protein kinase, catalytic domain [IPR006290] (1); EF-hand domain [IPR020283] (1); AP endonuclease 1 [IPR040808] (1); Serine/threonine-protein kinase, active site [IPR006271] (1); Protein kinase, ATP binding site [IPR017441] (1); Endonuclease/exonuclease/phosphatase [IPR005183] (1); EF-Hand 1, calcium-binding site [IPR018267] (1); Protein kinase domain [IPR000707] (1); EF-hand domain pair [IPR011992] (1); Zinc finger, GRI-type [IPR010666] (1); Protein kinase-like domain [IPR011099] (1) |                              | C_unihh_02420_mRNA_3,1     | -                           |
| GF0042692 | 0                         | 1                       | 0                        | Hypothetical protein (1)                                                                          |                                                                                                                                                                                                                                                                                                                                                                                                    |                                                                                                                                                                                                                                                                                                                                                                                                                                                                                                                                             |                              | C_unihh_02419_mRNA_1,1     | -                           |
| GF0042691 | 0                         | 1                       | 0                        | Phosphoprotein phosphatase (1)                                                                    |                                                                                                                                                                                                                                                                                                                                                                                                    |                                                                                                                                                                                                                                                                                                                                                                                                                                                                                                                                             |                              | C_unihh_02418_mRNA_3,1     | -                           |
| GF0042690 | 0                         | 1                       | 0                        | Hypothetical protein (1)                                                                          |                                                                                                                                                                                                                                                                                                                                                                                                    |                                                                                                                                                                                                                                                                                                                                                                                                                                                                                                                                             |                              | C_unihh_02418_mRNA_1,1     | -                           |
| GF0042689 | 0                         | 1                       | 0                        | Hypothetical protein (1)                                                                          |                                                                                                                                                                                                                                                                                                                                                                                                    |                                                                                                                                                                                                                                                                                                                                                                                                                                                                                                                                             |                              | C_unihh_02416_mRNA_1,1     | -                           |
| GF0042688 | 0                         | 1                       | 0                        | Hypothetical protein (1)                                                                          |                                                                                                                                                                                                                                                                                                                                                                                                    |                                                                                                                                                                                                                                                                                                                                                                                                                                                                                                                                             |                              | C_unihh_02415_mRNA_3,1     | -                           |
| GF0042687 | 0                         | 1                       | 0                        | Hypothetical protein (1)                                                                          |                                                                                                                                                                                                                                                                                                                                                                                                    |                                                                                                                                                                                                                                                                                                                                                                                                                                                                                                                                             |                              | C_unihh_02415_mRNA_1,1     | -                           |
| GF0042686 | 0                         | 1                       | 0                        | Hypothetical protein (1)                                                                          |                                                                                                                                                                                                                                                                                                                                                                                                    |                                                                                                                                                                                                                                                                                                                                                                                                                                                                                                                                             |                              | C_unihh_02413_mRNA_4,1     | -                           |
| GF0042685 | 0                         | 1                       | 0                        | Hypothetical protein (1)                                                                          |                                                                                                                                                                                                                                                                                                                                                                                                    |                                                                                                                                                                                                                                                                                                                                                                                                                                                                                                                                             |                              | C_unihh_02413_mRNA_3,1     | -                           |
| GF0042684 | 0                         | 1                       | 0                        | Hypothetical protein (1)                                                                          |                                                                                                                                                                                                                                                                                                                                                                                                    |                                                                                                                                                                                                                                                                                                                                                                                                                                                                                                                                             |                              | C_unihh_02413_mRNA_2,1     | -                           |
| GF0042683 | 0                         | 1                       | 0                        | Hypothetical protein (1)                                                                          |                                                                                                                                                                                                                                                                                                                                                                                                    |                                                                                                                                                                                                                                                                                                                                                                                                                                                                                                                                             |                              | C_unihh_02412_mRNA_5,1     | -                           |
| GF0042682 | 0                         | 1                       | 0                        | Hypothetical protein (1)                                                                          | deadenylation-dependent decapping of mature-transcribed mRNA [GO:0006290 biological_process] (1); positive regulation of catalytic activity [GO:0043885 biological_process] (1); enzyme activator activity [GO:0008047 molecular_function] (1)                                                                                                                                                     | mRNA-decapping enzyme subunit 1 [IPR010344] (1)                                                                                                                                                                                                                                                                                                                                                                                                                                                                                             |                              | C_unihh_02412_mRNA_1,1     | -                           |
| GF0042681 | 0                         | 1                       | 0                        | Hypothetical protein (1)                                                                          |                                                                                                                                                                                                                                                                                                                                                                                                    |                                                                                                                                                                                                                                                                                                                                                                                                                                                                                                                                             |                              | C_unihh_02411_mRNA_5,1     | -                           |
| GF0042680 | 0                         | 1                       | 0                        | Hypothetical protein (1)                                                                          |                                                                                                                                                                                                                                                                                                                                                                                                    |                                                                                                                                                                                                                                                                                                                                                                                                                                                                                                                                             |                              | C_unihh_02411_mRNA_3,1     | -                           |
| GF0042679 | 0                         | 1                       | 0                        | Hypothetical protein (1)                                                                          |                                                                                                                                                                                                                                                                                                                                                                                                    |                                                                                                                                                                                                                                                                                                                                                                                                                                                                                                                                             |                              | C_unihh_02410_mRNA_1,1     | -                           |
| GF0042678 | 0                         | 1                       | 0                        | Hypothetical protein (1)                                                                          | nucleic acid binding [GO:0003676 molecular_function] (1)                                                                                                                                                                                                                                                                                                                                           | Ribonuclease H-like domain [IPR012337] (1); Leucine-rich repeat domain, L domain-like [IPR026751] (1)                                                                                                                                                                                                                                                                                                                                                                                                                                       |                              | C_unihh_02409_mRNA_3,1     | -                           |
| GF0042677 | 0                         | 1                       | 0                        | Hypothetical protein (1)                                                                          | protein binding [GO:0005515 molecular_function] (1)                                                                                                                                                                                                                                                                                                                                                | Leucine-rich repeat domain, L domain-like [IPR026751] (1); Leucine-rich repeat [IPR016111] (1)                                                                                                                                                                                                                                                                                                                                                                                                                                              |                              | C_unihh_02409_mRNA_2,1     | -                           |
| GF0042676 | 0                         | 1                       | 0                        | Hypothetical protein (1)                                                                          |                                                                                                                                                                                                                                                                                                                                                                                                    |                                                                                                                                                                                                                                                                                                                                                                                                                                                                                                                                             |                              | C_unihh_02409_mRNA_1,1     | -                           |
| GF0042675 | 0                         | 1                       | 0                        | Hypothetical protein (1)                                                                          |                                                                                                                                                                                                                                                                                                                                                                                                    |                                                                                                                                                                                                                                                                                                                                                                                                                                                                                                                                             |                              | C_unihh_02408_mRNA_1,1     | -                           |
| GF0042674 | 0                         | 1                       | 0                        | Hypothetical protein (1)                                                                          |                                                                                                                                                                                                                                                                                                                                                                                                    |                                                                                                                                                                                                                                                                                                                                                                                                                                                                                                                                             |                              | C_unihh_02407_mRNA_5,1     | -                           |
| GF0042673 | 0                         | 1                       | 0                        | Hypothetical protein (1)                                                                          |                                                                                                                                                                                                                                                                                                                                                                                                    |                                                                                                                                                                                                                                                                                                                                                                                                                                                                                                                                             |                              | C_unihh_02407_mRNA_4,1     | -                           |
| GF0042672 | 0                         | 1                       | 0                        | Hypothetical protein (1)                                                                          |                                                                                                                                                                                                                                                                                                                                                                                                    |                                                                                                                                                                                                                                                                                                                                                                                                                                                                                                                                             |                              | C_unihh_02406_mRNA_6,1     | -                           |
| GF0042671 | 0                         | 1                       | 0                        | Hypothetical protein (1)                                                                          | transferase activity, transferring hexosyl groups [GO:0016758 molecular_function] (1); metabolic process [GO:0008152 biological_process] (1)                                                                                                                                                                                                                                                       | UDP-galactose 4-epimerase/galactose 4-epimerase [IPR002213] (1)                                                                                                                                                                                                                                                                                                                                                                                                                                                                             |                              | C_unihh_02404_mRNA_1,1     | -                           |
| GF0042670 | 0                         | 1                       | 0                        | Hypothetical protein (1)                                                                          |                                                                                                                                                                                                                                                                                                                                                                                                    |                                                                                                                                                                                                                                                                                                                                                                                                                                                                                                                                             |                              | C_unihh_02403_mRNA_9,1     | -                           |
| GF0042669 | 0                         | 1                       | 0                        | Hypothetical protein (1)                                                                          |                                                                                                                                                                                                                                                                                                                                                                                                    |                                                                                                                                                                                                                                                                                                                                                                                                                                                                                                                                             |                              | C_unihh_02403_mRNA_4,1     | -                           |
| GF0042668 | 0                         | 1                       | 0                        | Hypothetical protein (1)                                                                          |                                                                                                                                                                                                                                                                                                                                                                                                    |                                                                                                                                                                                                                                                                                                                                                                                                                                                                                                                                             |                              | C_unihh_02403_mRNA_2,1     | -                           |
| GF0042667 | 0                         | 1                       | 0                        | Hypothetical protein (1)                                                                          |                                                                                                                                                                                                                                                                                                                                                                                                    |                                                                                                                                                                                                                                                                                                                                                                                                                                                                                                                                             |                              | C_unihh_02403_mRNA_1,1     | -                           |
| GF0042666 | 0                         | 1                       | 0                        | Glucose-methanol-choline (GMC) oxidoreductase family protein (1)                                  | oxidation-reduction process [GO:005514 biological_process] (1); oxidoreductase activity [GO:0016491 molecular_function] (1); flavin adenine dinucleotide binding [GO:0050660 molecular_function] (1); oxidoreductase activity, acting on CH-OH group of donors [GO:0016614 molecular_function] (1)                                                                                                 | FAD/NAD(P)-binding domain [IPR023753] (1); Glucose-methanol-choline oxidoreductase, N-terminal [IPR000172] (1); Glucose-methanol-choline oxidoreductase, C-terminal [IPR007867] (1)                                                                                                                                                                                                                                                                                                                                                         |                              | C_unihh_02401_mRNA_2,1     | -                           |
| GF0042665 | 0                         | 1                       | 0                        | Hypothetical protein (1)                                                                          |                                                                                                                                                                                                                                                                                                                                                                                                    |                                                                                                                                                                                                                                                                                                                                                                                                                                                                                                                                             |                              | C_unihh_02400_mRNA_3,1     | -                           |
| GF0042664 | 0                         | 1                       | 0                        | Hypothetical protein (1)                                                                          |                                                                                                                                                                                                                                                                                                                                                                                                    |                                                                                                                                                                                                                                                                                                                                                                                                                                                                                                                                             |                              | C_unihh_02399_mRNA_2,1     | -                           |
| GF0042663 | 0                         | 1                       | 0                        | Hypothetical protein (1)                                                                          |                                                                                                                                                                                                                                                                                                                                                                                                    |                                                                                                                                                                                                                                                                                                                                                                                                                                                                                                                                             |                              | C_unihh_02399_mRNA_1,1     | -                           |
| GF0042662 | 0                         | 1                       | 0                        | S-adenosyl-L-methionine-dependent O-methyltransferase superfamily protein, putative isoform 2 (1) |                                                                                                                                                                                                                                                                                                                                                                                                    | S-adenosyl-L-methionine-dependent methyltransferase [IPR029631] (1); Methyltransferase domain [IPR025714] (1)                                                                                                                                                                                                                                                                                                                                                                                                                               |                              | C_unihh_02396_mRNA_4,1     | -                           |
| GF0042661 | 0                         | 1                       | 0                        | Hypothetical protein (1)                                                                          | host cell surface receptor binding [GO:0046789 molecular_function] (1); fusion of virus membrane with host plasma membrane [GO:0019064 biological_process] (1); viral envelope [GO:0019031 cellular_component] (1)                                                                                                                                                                                 | Haemagglutinin, stalk [IPR013829] (1)                                                                                                                                                                                                                                                                                                                                                                                                                                                                                                       |                              | C_unihh_02392_mRNA_1,1     | -                           |
| GF0042660 | 0                         | 1                       | 0                        | Hypothetical protein (1)                                                                          |                                                                                                                                                                                                                                                                                                                                                                                                    |                                                                                                                                                                                                                                                                                                                                                                                                                                                                                                                                             |                              | C_unihh_02390_mRNA_2,1     | -                           |
| GF0042659 | 0                         | 1                       | 0                        | Hypothetical protein (1)                                                                          |                                                                                                                                                                                                                                                                                                                                                                                                    |                                                                                                                                                                                                                                                                                                                                                                                                                                                                                                                                             |                              | C_unihh_02390_mRNA_1,1     | -                           |
| GF0042658 | 0                         | 1                       | 0                        | Hypothetical protein (1)                                                                          |                                                                                                                                                                                                                                                                                                                                                                                                    |                                                                                                                                                                                                                                                                                                                                                                                                                                                                                                                                             |                              | C_unihh_02388_mRNA_3,1     | -                           |
| GF0042657 | 0                         | 1                       | 0                        | Hypothetical protein (1)                                                                          |                                                                                                                                                                                                                                                                                                                                                                                                    |                                                                                                                                                                                                                                                                                                                                                                                                                                                                                                                                             |                              | C_unihh_02388_mRNA_2,1     | -                           |
| GF0042656 | 0                         | 1                       | 0                        | Mosses/bark transport protein (1)                                                                 |                                                                                                                                                                                                                                                                                                                                                                                                    |                                                                                                                                                                                                                                                                                                                                                                                                                                                                                                                                             |                              | C_unihh_02388_mRNA_1,1     | -                           |
| GF0042655 | 0                         | 1                       | 0                        | Hypothetical protein (1)                                                                          |                                                                                                                                                                                                                                                                                                                                                                                                    |                                                                                                                                                                                                                                                                                                                                                                                                                                                                                                                                             |                              | C_unihh_02387_mRNA_2,1     | -                           |
| GF0042654 | 0                         | 1                       | 0                        | Hypothetical protein (1)                                                                          | hydrolyase activity, acting on carbon-nitrogen (but not peptide) bonds [GO:0016160 molecular_function] (1); nitrogen compound metabolic process [GO:0006807 biological_process] (1)                                                                                                                                                                                                                | Carbon-nitrogen hydrolase [IPR003010] (1)                                                                                                                                                                                                                                                                                                                                                                                                                                                                                                   |                              | C_unihh_02386_mRNA_3,1     | -                           |
| GF0042653 | 0                         | 1                       | 0                        | Hypothetical protein (1)                                                                          | polysaccharide binding [GO:0030247 molecular_function] (1); calcium ion binding [GO:0005509 molecular_function] (1); protein binding [GO:0005515 molecular_function] (1)                                                                                                                                                                                                                           | Gag-polypeptide of LTR copia-type [IPR029472] (1); EGF-like calcium-binding domain [IPR018811] (1); EGF-type structural-superfamily beta-strand site [IPR000152] (1); EGF-like domain [IPR000423] (1); EGF-like calcium-binding, conserved site [IPR018997] (1); Wall-associated receptor kinase, galactose-binding domain [IPR025287] (1)                                                                                                                                                                                                  |                              | C_unihh_02386_mRNA_2,1     | -                           |
| GF0042652 | 0                         | 1                       | 0                        | Hypothetical protein (1)                                                                          |                                                                                                                                                                                                                                                                                                                                                                                                    |                                                                                                                                                                                                                                                                                                                                                                                                                                                                                                                                             |                              | C_unihh_02384_mRNA_1,1     | -                           |

| ID        | Num. in C. crottenstei | Num. in C. auris | Num. in P. putida | Note                                                                   | GO                                                                                                                                                                                                                                                                                                                 | InterPro                                                                                                                                                                                                                                                                                                                                                 | Members in C. crottenstei | Members in C. auris    | Members in P. putida |
|-----------|------------------------|------------------|-------------------|------------------------------------------------------------------------|--------------------------------------------------------------------------------------------------------------------------------------------------------------------------------------------------------------------------------------------------------------------------------------------------------------------|----------------------------------------------------------------------------------------------------------------------------------------------------------------------------------------------------------------------------------------------------------------------------------------------------------------------------------------------------------|---------------------------|------------------------|----------------------|
| GF0042651 | 0                      | 1                | 0                 | Hypothetical protein (1)                                               |                                                                                                                                                                                                                                                                                                                    | Nucleophile aminoalcoholases, N-terminal [IPR020655] (1); Glutamine amidotransferase type 2 domain [IPR017923] (4)                                                                                                                                                                                                                                       |                           | C_ushii_02383_mRNA_4.1 | -                    |
| GF0042650 | 0                      | 1                | 0                 | Hypothetical protein (1)                                               |                                                                                                                                                                                                                                                                                                                    | Domain of unknown function DUF4283 [IPR025588] (1); Zinc knuckle CXCXC4HXAC [IPR028363] (1)                                                                                                                                                                                                                                                              |                           | C_ushii_02383_mRNA_2.1 | -                    |
| GF0042649 | 0                      | 1                | 0                 | Hypothetical protein (1)                                               |                                                                                                                                                                                                                                                                                                                    |                                                                                                                                                                                                                                                                                                                                                          |                           | C_ushii_02380_mRNA_5.1 | -                    |
| GF0042648 | 0                      | 1                | 0                 | Hypothetical protein (1)                                               |                                                                                                                                                                                                                                                                                                                    |                                                                                                                                                                                                                                                                                                                                                          |                           | C_ushii_02380_mRNA_3.1 | -                    |
| GF0042647 | 0                      | 1                | 0                 | Hypothetical protein (1)                                               |                                                                                                                                                                                                                                                                                                                    |                                                                                                                                                                                                                                                                                                                                                          |                           | C_ushii_02380_mRNA_2.1 | -                    |
| GF0042646 | 0                      | 1                | 0                 | Hypothetical protein (1)                                               |                                                                                                                                                                                                                                                                                                                    |                                                                                                                                                                                                                                                                                                                                                          |                           | C_ushii_02377_mRNA_5.1 | -                    |
| GF0042645 | 0                      | 1                | 0                 | Hypothetical protein (1)                                               | transferase activity, transferring acyl groups other than amino-acyl groups [GO:0016747 molecular_function] (1)                                                                                                                                                                                                    | Chloroamphenicol acetyltransferase-like domain [IPR023213] (1); Transferase [IPR003480] (4)                                                                                                                                                                                                                                                              |                           | C_ushii_02377_mRNA_2.1 | -                    |
| GF0042644 | 0                      | 1                | 0                 | Hypothetical protein (1)                                               | heme binding [GO:0020037 molecular_function] (1); iron ion binding [GO:0005506 molecular_function] (1); oxidation-reduction process [GO:0005118 biological_process] (1); oxidoreductase activity, acting on paired donors, with incorporation or reduction of molecular oxygen [GO:0016705 molecular_function] (1) | Cytochrome P450 [IPR01128] (1); Cytochrome P450, conserved site [IPR017923] (1); Cytochrome P450, E-class, group I [IPR002401] (1)                                                                                                                                                                                                                       |                           | C_ushii_02376_mRNA_3.1 | -                    |
| GF0042643 | 0                      | 1                | 0                 | Cytochrome P450 (1)                                                    |                                                                                                                                                                                                                                                                                                                    |                                                                                                                                                                                                                                                                                                                                                          |                           | C_ushii_02376_mRNA_1.1 | -                    |
| GF0042642 | 0                      | 1                | 0                 | Hypothetical protein (1)                                               |                                                                                                                                                                                                                                                                                                                    |                                                                                                                                                                                                                                                                                                                                                          |                           | C_ushii_02375_mRNA_3.1 | -                    |
| GF0042641 | 0                      | 1                | 0                 | Hypothetical protein (1)                                               |                                                                                                                                                                                                                                                                                                                    |                                                                                                                                                                                                                                                                                                                                                          |                           | C_ushii_02375_mRNA_2.1 | -                    |
| GF0042640 | 0                      | 1                | 0                 | Hypothetical protein (1)                                               |                                                                                                                                                                                                                                                                                                                    |                                                                                                                                                                                                                                                                                                                                                          |                           | C_ushii_02373_mRNA_1.1 | -                    |
| GF0042639 | 0                      | 1                | 0                 | Hypothetical protein (1)                                               |                                                                                                                                                                                                                                                                                                                    |                                                                                                                                                                                                                                                                                                                                                          |                           | C_ushii_02372_mRNA_5.1 | -                    |
| GF0042638 | 0                      | 1                | 0                 | Hypothetical protein (1)                                               |                                                                                                                                                                                                                                                                                                                    | Leucine-rich repeat domain, L domain-like [IPR026755] (1)                                                                                                                                                                                                                                                                                                |                           | C_ushii_02371_mRNA_1.1 | -                    |
| GF0042637 | 0                      | 1                | 0                 | Amino acid permease family protein (1)                                 | membrane [GO:0016020 cellular_component] (1); amino acid transmembrane transport [GO:0003333 biological_process] (1); amino acid transmembrane transporter activity [GO:0015171 molecular_function] (1)                                                                                                            | Amino acid polyamine transporter 1 [IPR002293] (4)                                                                                                                                                                                                                                                                                                       |                           | C_ushii_02370_mRNA_2.1 | -                    |
| GF0042636 | 0                      | 1                | 0                 | Hypothetical protein (1)                                               |                                                                                                                                                                                                                                                                                                                    |                                                                                                                                                                                                                                                                                                                                                          |                           | C_ushii_02369_mRNA_4.1 | -                    |
| GF0042635 | 0                      | 1                | 0                 | Hypothetical protein (1)                                               |                                                                                                                                                                                                                                                                                                                    |                                                                                                                                                                                                                                                                                                                                                          |                           | C_ushii_02369_mRNA_2.1 | -                    |
| GF0042634 | 0                      | 1                | 0                 | Hypothetical protein (1)                                               |                                                                                                                                                                                                                                                                                                                    |                                                                                                                                                                                                                                                                                                                                                          |                           | C_ushii_02368_mRNA_3.1 | -                    |
| GF0042633 | 0                      | 1                | 0                 | OTU-like cysteine protease (1)                                         | regulation of transcription, DNA-templated [GO:0006355 biological_process] (1)                                                                                                                                                                                                                                     | FAR1 DNA binding domain [IPR004320] (1); FHY3/FAR1 family [IPR031052] (1)                                                                                                                                                                                                                                                                                |                           | C_ushii_02368_mRNA_1.1 | -                    |
| GF0042632 | 0                      | 1                | 0                 | Hypothetical protein (1)                                               | ADP binding [GO:0043531 molecular_function] (1)                                                                                                                                                                                                                                                                    | P-loop containing nucleoside triphosphate hydrolase [IPR027417] (1); NB-ARC [IPR002152] (1)                                                                                                                                                                                                                                                              |                           | C_ushii_02367_mRNA_1.1 | -                    |
| GF0042631 | 0                      | 1                | 0                 | Histone-lysine N-acetyltransferase EZ2 (1)                             | protein binding [GO:0005515 molecular_function] (1)                                                                                                                                                                                                                                                                | SET domain [IPR001214] (1)                                                                                                                                                                                                                                                                                                                               |                           | C_ushii_02365_mRNA_2.1 | -                    |
| GF0042630 | 0                      | 1                | 0                 | PLC-like phosphodiesterase superfamily protein (1)                     | lipid metabolic process [GO:0006629 biological_process] (1); phosphoric diester hydrolase activity [GO:0008081 molecular_function] (1)                                                                                                                                                                             | PLC-like phosphodiesterase, TIM beta alpha-barrel domain [IPR017946] (1)                                                                                                                                                                                                                                                                                 |                           | C_ushii_02365_mRNA_1.1 | -                    |
| GF0042629 | 0                      | 1                | 0                 | Hypothetical protein (1)                                               |                                                                                                                                                                                                                                                                                                                    |                                                                                                                                                                                                                                                                                                                                                          |                           | C_ushii_02364_mRNA_4.1 | -                    |
| GF0042628 | 0                      | 1                | 0                 | Isospartyl pyridoxal-L-asparaginase (1)                                | hydrolase activity [GO:0016787 molecular_function] (1)                                                                                                                                                                                                                                                             | Nucleophile aminoalcoholases, N-terminal [IPR020655] (1); Peptidase T2, asparaginase 2 [IPR000246] (1)                                                                                                                                                                                                                                                   |                           | C_ushii_02363_mRNA_1.1 | -                    |
| GF0042627 | 0                      | 1                | 0                 | Hypothetical protein (1)                                               |                                                                                                                                                                                                                                                                                                                    |                                                                                                                                                                                                                                                                                                                                                          |                           | C_ushii_02362_mRNA_6.1 | -                    |
| GF0042626 | 0                      | 1                | 0                 | Hypothetical protein (1)                                               |                                                                                                                                                                                                                                                                                                                    |                                                                                                                                                                                                                                                                                                                                                          |                           | C_ushii_02362_mRNA_5.1 | -                    |
| GF0042625 | 0                      | 1                | 0                 | Hypothetical protein (1)                                               |                                                                                                                                                                                                                                                                                                                    |                                                                                                                                                                                                                                                                                                                                                          |                           | C_ushii_02362_mRNA_4.1 | -                    |
| GF0042624 | 0                      | 1                | 0                 | Hypothetical protein (1)                                               |                                                                                                                                                                                                                                                                                                                    |                                                                                                                                                                                                                                                                                                                                                          |                           | C_ushii_02362_mRNA_1.1 | -                    |
| GF0042623 | 0                      | 1                | 0                 | Hypothetical protein (1)                                               | photoperiodism, flowering [GO:0048573 biological_process] (1); phosphorylcholine-binding [GO:0008429 molecular_function] (1); regulation of flower development [GO:0009969 biological_process] (1)                                                                                                                 | Phosphatidylethanolamine-binding protein PEAP [IPR000894] (1); Phosphatidylethanolamine-binding, conserved site [IPR018588] (1); Protein FLOWERING LOCUS T [IPR011095] (1)                                                                                                                                                                               |                           | C_ushii_02361_mRNA_1.1 | -                    |
| GF0042622 | 0                      | 1                | 0                 | Hypothetical protein (1)                                               |                                                                                                                                                                                                                                                                                                                    |                                                                                                                                                                                                                                                                                                                                                          |                           | C_ushii_02360_mRNA_3.1 | -                    |
| GF0042621 | 0                      | 1                | 0                 | Hypothetical protein (1)                                               |                                                                                                                                                                                                                                                                                                                    |                                                                                                                                                                                                                                                                                                                                                          |                           | C_ushii_02360_mRNA_1.1 | -                    |
| GF0042620 | 0                      | 1                | 0                 | Hypothetical protein (1)                                               | integral component of membrane [GO:0016021 cellular_component] (1); inorganic anion exchanger activity [GO:0005452 molecular_function] (1); membrane [GO:0016020 cellular_component] (1); anion transport [GO:0006620 biological_process] (1)                                                                      | Bicarbonate transporter, eukaryotic [IPR003025] (1); Bicarbonate transporter, C-terminal [IPR011531] (1)                                                                                                                                                                                                                                                 |                           | C_ushii_02359_mRNA_1.1 | -                    |
| GF0042619 | 0                      | 1                | 0                 | Hypothetical protein (1)                                               |                                                                                                                                                                                                                                                                                                                    |                                                                                                                                                                                                                                                                                                                                                          |                           | C_ushii_02357_mRNA_2.1 | -                    |
| GF0042618 | 0                      | 1                | 0                 | UPF0481 protein (1)                                                    |                                                                                                                                                                                                                                                                                                                    | Protein of unknown function DUF247, plant [IPR004195] (1)                                                                                                                                                                                                                                                                                                |                           | C_ushii_02357_mRNA_1.1 | -                    |
| GF0042617 | 0                      | 1                | 0                 | Hypothetical protein (1)                                               |                                                                                                                                                                                                                                                                                                                    |                                                                                                                                                                                                                                                                                                                                                          |                           | C_ushii_02356_mRNA_5.1 | -                    |
| GF0042616 | 0                      | 1                | 0                 | Hypothetical protein (1)                                               |                                                                                                                                                                                                                                                                                                                    | Leucine-rich repeat 3 [IPR017133] (1)                                                                                                                                                                                                                                                                                                                    |                           | C_ushii_02356_mRNA_2.1 | -                    |
| GF0042615 | 0                      | 1                | 0                 | Hypothetical protein (1)                                               |                                                                                                                                                                                                                                                                                                                    | Gag-polypropeptide of LTR copia-type [IPR029712] (1)                                                                                                                                                                                                                                                                                                     |                           | C_ushii_02356_mRNA_1.1 | -                    |
| GF0042614 | 0                      | 1                | 0                 | RNA-directed DNA polymerase (Reverse transcriptase) (1)                |                                                                                                                                                                                                                                                                                                                    | Reverse transcriptase domain [IPR000477] (4)                                                                                                                                                                                                                                                                                                             |                           | C_ushii_02355_mRNA_1.1 | -                    |
| GF0042613 | 0                      | 1                | 0                 | Hypothetical protein (1)                                               |                                                                                                                                                                                                                                                                                                                    |                                                                                                                                                                                                                                                                                                                                                          |                           | C_ushii_02354_mRNA_1.1 | -                    |
| GF0042612 | 0                      | 1                | 0                 | Ribonuclease H (1)                                                     | nucleic acid binding [GO:0003676 molecular_function] (1)                                                                                                                                                                                                                                                           | Ribonuclease H-like domain [IPR012337] (1)                                                                                                                                                                                                                                                                                                               |                           | C_ushii_02353_mRNA_5.1 | -                    |
| GF0042611 | 0                      | 1                | 0                 | Hypothetical protein (1)                                               |                                                                                                                                                                                                                                                                                                                    | Reverse transcriptase domain [IPR000477] (1)                                                                                                                                                                                                                                                                                                             |                           | C_ushii_02353_mRNA_4.1 | -                    |
| GF0042610 | 0                      | 1                | 0                 | Hypothetical protein (1)                                               |                                                                                                                                                                                                                                                                                                                    |                                                                                                                                                                                                                                                                                                                                                          |                           | C_ushii_02353_mRNA_3.1 | -                    |
| GF0042609 | 0                      | 1                | 0                 | Hypothetical protein (1)                                               | zinc ion binding [GO:0008270 molecular_function] (1); nucleic acid binding [GO:0003676 molecular_function] (1)                                                                                                                                                                                                     | Zinc finger, CCHC-type [IPR001878] (1); Zinc knuckle CXCXC4HXAC [IPR028363] (1)                                                                                                                                                                                                                                                                          |                           | C_ushii_02353_mRNA_2.1 | -                    |
| GF0042608 | 0                      | 1                | 0                 | Hypothetical protein (1)                                               |                                                                                                                                                                                                                                                                                                                    |                                                                                                                                                                                                                                                                                                                                                          |                           | C_ushii_02353_mRNA_1.1 | -                    |
| GF0042607 | 0                      | 1                | 0                 | Disease resistance protein (1)                                         | ADP binding [GO:0043531 molecular_function] (1)                                                                                                                                                                                                                                                                    | AAA+ ATPase domain [IPR003593] (1); NB-ARC [IPR021821] (1); P-loop containing nucleoside triphosphate hydrolase [IPR027417] (1); Leucine-rich repeat domain, L domain-like [IPR026755] (1)                                                                                                                                                               |                           | C_ushii_02351_mRNA_4.1 | -                    |
| GF0042606 | 0                      | 1                | 0                 | Hypothetical protein (1)                                               |                                                                                                                                                                                                                                                                                                                    |                                                                                                                                                                                                                                                                                                                                                          |                           | C_ushii_02351_mRNA_2.1 | -                    |
| GF0042605 | 0                      | 1                | 0                 | Phosphoprotein phosphatase (1)                                         |                                                                                                                                                                                                                                                                                                                    | Leucine-rich repeat domain, L domain-like [IPR026755] (1)                                                                                                                                                                                                                                                                                                |                           | C_ushii_02351_mRNA_1.1 | -                    |
| GF0042604 | 0                      | 1                | 0                 | Hypothetical protein (1)                                               |                                                                                                                                                                                                                                                                                                                    |                                                                                                                                                                                                                                                                                                                                                          |                           | C_ushii_02350_mRNA_4.1 | -                    |
| GF0042603 | 0                      | 1                | 0                 | Hypothetical protein (1)                                               | regulation of transcription, DNA-templated [GO:0006355 biological_process] (1)                                                                                                                                                                                                                                     | FHY3/FAR1 family [IPR031052] (1)                                                                                                                                                                                                                                                                                                                         |                           | C_ushii_02350_mRNA_3.1 | -                    |
| GF0042602 | 0                      | 1                | 0                 | Hypothetical protein (1)                                               |                                                                                                                                                                                                                                                                                                                    |                                                                                                                                                                                                                                                                                                                                                          |                           | C_ushii_02349_mRNA_1.1 | -                    |
| GF0042601 | 0                      | 1                | 0                 | Hypothetical protein (1)                                               |                                                                                                                                                                                                                                                                                                                    |                                                                                                                                                                                                                                                                                                                                                          |                           | C_ushii_02346_mRNA_5.1 | -                    |
| GF0042600 | 0                      | 1                | 0                 | Hypothetical protein (1)                                               |                                                                                                                                                                                                                                                                                                                    |                                                                                                                                                                                                                                                                                                                                                          |                           | C_ushii_02346_mRNA_2.1 | -                    |
| GF0042599 | 0                      | 1                | 0                 | Hypothetical protein (1)                                               |                                                                                                                                                                                                                                                                                                                    |                                                                                                                                                                                                                                                                                                                                                          |                           | C_ushii_02346_mRNA_1.1 | -                    |
| GF0042598 | 0                      | 1                | 0                 | Hypothetical protein (1)                                               |                                                                                                                                                                                                                                                                                                                    |                                                                                                                                                                                                                                                                                                                                                          |                           | C_ushii_02345_mRNA_4.1 | -                    |
| GF0042597 | 0                      | 1                | 0                 | Hypothetical protein (1)                                               |                                                                                                                                                                                                                                                                                                                    |                                                                                                                                                                                                                                                                                                                                                          |                           | C_ushii_02345_mRNA_3.1 | -                    |
| GF0042596 | 0                      | 1                | 0                 | Hypothetical protein (1)                                               |                                                                                                                                                                                                                                                                                                                    |                                                                                                                                                                                                                                                                                                                                                          |                           | C_ushii_02342_mRNA_2.1 | -                    |
| GF0042595 | 0                      | 1                | 0                 | Hypothetical protein (1)                                               |                                                                                                                                                                                                                                                                                                                    |                                                                                                                                                                                                                                                                                                                                                          |                           | C_ushii_02342_mRNA_1.1 | -                    |
| GF0042594 | 0                      | 1                | 0                 | Hypothetical protein (1)                                               |                                                                                                                                                                                                                                                                                                                    |                                                                                                                                                                                                                                                                                                                                                          |                           | C_ushii_02341_mRNA_3.1 | -                    |
| GF0042593 | 0                      | 1                | 0                 | Hypothetical protein (1)                                               |                                                                                                                                                                                                                                                                                                                    |                                                                                                                                                                                                                                                                                                                                                          |                           | C_ushii_02341_mRNA_2.1 | -                    |
| GF0042592 | 0                      | 1                | 0                 | NF-kappa-B inhibitor cactus (1)                                        | protein binding [GO:0005515 molecular_function] (1)                                                                                                                                                                                                                                                                | Ankyrin repeat [IPR002110] (1); Ankyrin repeat-containing domain [IPR020683] (1)                                                                                                                                                                                                                                                                         |                           | C_ushii_02341_mRNA_1.1 | -                    |
| GF0042591 | 0                      | 1                | 0                 | Cytokinin riboside 5'-monophosphate phosphohydrolase (1)               |                                                                                                                                                                                                                                                                                                                    | LOG family [IPR031100] (1)                                                                                                                                                                                                                                                                                                                               |                           | C_ushii_02340_mRNA_3.1 | -                    |
| GF0042590 | 0                      | 1                | 0                 | Hypothetical protein (1)                                               |                                                                                                                                                                                                                                                                                                                    |                                                                                                                                                                                                                                                                                                                                                          |                           | C_ushii_02339_mRNA_4.1 | -                    |
| GF0042589 | 0                      | 1                | 0                 | Hypothetical protein (1)                                               | serine-type carboxypeptidase activity [GO:0004185 molecular_function] (1); proteolysis [GO:0006508 biological_process] (1)                                                                                                                                                                                         | Peptidase S10, amin carboxypeptidase [IPR001563] (1); Alpha Beta hydrolase fold [IPR029058] (1)                                                                                                                                                                                                                                                          |                           | C_ushii_02339_mRNA_2.1 | -                    |
| GF0042588 | 0                      | 1                | 0                 | Hypothetical protein (1)                                               | zinc ion binding [GO:0008270 molecular_function] (1); nucleic acid binding [GO:0003676 molecular_function] (1)                                                                                                                                                                                                     | Zinc finger, CCHC-type [IPR001878] (1)                                                                                                                                                                                                                                                                                                                   |                           | C_ushii_02338_mRNA_4.1 | -                    |
| GF0042587 | 0                      | 1                | 0                 | Hypothetical protein (1)                                               |                                                                                                                                                                                                                                                                                                                    |                                                                                                                                                                                                                                                                                                                                                          |                           | C_ushii_02338_mRNA_2.1 | -                    |
| GF0042586 | 0                      | 1                | 0                 | Hypothetical protein (1)                                               |                                                                                                                                                                                                                                                                                                                    |                                                                                                                                                                                                                                                                                                                                                          |                           | C_ushii_02338_mRNA_1.1 | -                    |
| GF0042585 | 0                      | 1                | 0                 | Hypothetical protein (1)                                               |                                                                                                                                                                                                                                                                                                                    |                                                                                                                                                                                                                                                                                                                                                          |                           | C_ushii_02336_mRNA_2.1 | -                    |
| GF0042584 | 0                      | 1                | 0                 | Hypothetical protein (1)                                               |                                                                                                                                                                                                                                                                                                                    |                                                                                                                                                                                                                                                                                                                                                          |                           | C_ushii_02336_mRNA_1.1 | -                    |
| GF0042583 | 0                      | 1                | 0                 | Calcium-dependent protein kinase 17 (1)                                | calcium ion binding [GO:0005509 molecular_function] (1); protein phosphorylation [GO:0006468 biological_process] (1); protein kinase activity [GO:0004672 molecular_function] (1); ATP binding [GO:0005524 molecular_function] (1)                                                                                 | EF-hand domain pair [IPR011992] (1); Protein kinase domain [IPR000759] (1); Protein kinase-like domain [IPR011009] (1); Serine/threonine-protein kinase, active site [IPR008271] (1); EF-hand domain [IPR002048] (1); Serine/threonine dual specificity protein kinase, catalytic domain [IPR02296] (1); EF-Hand 1, calcium-binding site [IPR015247] (1) |                           | C_ushii_02335_mRNA_1.1 | -                    |
| GF0042582 | 0                      | 1                | 0                 | Transcription factor HHLH131 (1)                                       | protein dimerization activity [GO:0046983 molecular_function] (1)                                                                                                                                                                                                                                                  | Mys-type, basic helix-loop-helix (HHLH) domain [IPR011598] (1)                                                                                                                                                                                                                                                                                           |                           | C_ushii_02333_mRNA_3.1 | -                    |
| GF0042581 | 0                      | 1                | 0                 | Early nodulin 75-like protein (1)                                      |                                                                                                                                                                                                                                                                                                                    |                                                                                                                                                                                                                                                                                                                                                          |                           | C_ushii_02333_mRNA_2.1 | -                    |
| GF0042580 | 0                      | 1                | 0                 | Hypothetical protein (1)                                               |                                                                                                                                                                                                                                                                                                                    | P-loop containing nucleoside triphosphate hydrolase [IPR027417] (1)                                                                                                                                                                                                                                                                                      |                           | C_ushii_02330_mRNA_5.1 | -                    |
| GF0042579 | 0                      | 1                | 0                 | Hypothetical protein (1)                                               |                                                                                                                                                                                                                                                                                                                    |                                                                                                                                                                                                                                                                                                                                                          |                           | C_ushii_02328_mRNA_2.1 | -                    |
| GF0042578 | 0                      | 1                | 0                 | Hypothetical protein (1)                                               |                                                                                                                                                                                                                                                                                                                    |                                                                                                                                                                                                                                                                                                                                                          |                           | C_ushii_02327_mRNA_6.1 | -                    |
| GF0042577 | 0                      | 1                | 0                 | Hypothetical protein (1)                                               |                                                                                                                                                                                                                                                                                                                    |                                                                                                                                                                                                                                                                                                                                                          |                           | C_ushii_02327_mRNA_5.1 | -                    |
| GF0042576 | 0                      | 1                | 0                 | Hypothetical protein (1)                                               |                                                                                                                                                                                                                                                                                                                    |                                                                                                                                                                                                                                                                                                                                                          |                           | C_ushii_02327_mRNA_4.1 | -                    |
| GF0042575 | 0                      | 1                | 0                 | G-type lectin S-receptor-like serine/threonine-protein kinase RLK1 (1) | protein tyrosine kinase activity [GO:0004713 molecular_function] (1); recognition of pollen [GO:004544 biological_process] (1); protein phosphorylation [GO:0006468 biological_process] (1); protein kinase activity [GO:0004672 molecular_function] (1); ATP binding [GO:0005524 molecular_function] (1)          | PAN/Apple domain [IPR003609] (1); Bulb-type lectin domain [IPR001480] (1); S-leucin glycoprotein domain [IPR000849] (1); Serine/threonine-protein kinase, active site [IPR008271] (1); Tyrosine-protein kinase, catalytic domain [IPR020635] (1); Protein kinase-like domain [IPR011009] (1); Protein kinase domain [IPR000719] (1)                      |                           | C_ushii_02327_mRNA_1.1 | -                    |

| ID        | Num. in <i>C. crottensteini</i> | Num. in <i>C. auris</i> | Num. in <i>P. putida</i> | Name                                                     | GO                                                                                                                                                                                                                                                                                                                                                                                                                                              | InterPro                                                                                                                                                                                                                                                                            | Members in <i>C. crottensteini</i> | Members in <i>C. auris</i> | Members in <i>P. putida</i> |
|-----------|---------------------------------|-------------------------|--------------------------|----------------------------------------------------------|-------------------------------------------------------------------------------------------------------------------------------------------------------------------------------------------------------------------------------------------------------------------------------------------------------------------------------------------------------------------------------------------------------------------------------------------------|-------------------------------------------------------------------------------------------------------------------------------------------------------------------------------------------------------------------------------------------------------------------------------------|------------------------------------|----------------------------|-----------------------------|
| GF0042574 | 0                               | 1                       | 0                        | Hypothetical protein (1)                                 | metabolic process [GO:0008152]<br>biological_process (1)                                                                                                                                                                                                                                                                                                                                                                                        | Acetoinase A/isopropylmalate dehydratase small subunit, swivel domain [IPRO00573] (1); Acetoinase 2/isopropylmalate dehydratase, swivel [IPRO15925] (1); Acetoinase/isopropylmalate dehydratase [IPRO15937] (1)                                                                     | -                                  | C_ushii_02324_mRNA_4.1     | -                           |
| GF0042573 | 0                               | 1                       | 0                        | Hypothetical protein (1)                                 | -                                                                                                                                                                                                                                                                                                                                                                                                                                               | -                                                                                                                                                                                                                                                                                   | -                                  | C_ushii_02324_mRNA_3.1     | -                           |
| GF0042572 | 0                               | 1                       | 0                        | Hypothetical protein (1)                                 | -                                                                                                                                                                                                                                                                                                                                                                                                                                               | -                                                                                                                                                                                                                                                                                   | -                                  | C_ushii_02324_mRNA_1.1     | -                           |
| GF0042571 | 0                               | 1                       | 0                        | Hypothetical protein (1)                                 | -                                                                                                                                                                                                                                                                                                                                                                                                                                               | -                                                                                                                                                                                                                                                                                   | -                                  | C_ushii_02323_mRNA_1.1     | -                           |
| GF0042570 | 0                               | 1                       | 0                        | Caffeic acid O-methyltransferase (1)                     | protein dimerization activity [GO:0046983 molecular_function] (1); O-methyltransferase activity [GO:0008171 molecular_function] (1); methyltransferase activity [GO:0008168 molecular_function] (1)                                                                                                                                                                                                                                             | S-adenosyl-L-methionine-dependent methyltransferase [IPRO29063] (1); O-methyltransferase, family 2 [IPRO01077] (1); Winged helix-sumo-beta1 DNA-binding domain [IPRO15911] (1); Plant methyltransferase dimerization [IPRO12967] (1); O-methyltransferase COMT-type [IPRO16461] (1) | -                                  | C_ushii_02321_mRNA_3.1     | -                           |
| GF0042569 | 0                               | 1                       | 0                        | Polymacrolide transferase, Ribonuclease H fold (1)       | nucleic acid binding [GO:0003676 molecular_function] (1)                                                                                                                                                                                                                                                                                                                                                                                        | Zinc knuckle CXCXC4HXK [IPRO25536] (1); Ribonuclease H-like domain [IPRO25237] (1); Domain of unknown function DUF4283 [IPRO25558] (1)                                                                                                                                              | -                                  | C_ushii_02321_mRNA_2.1     | -                           |
| GF0042568 | 0                               | 1                       | 0                        | TSA: Wollemiella nobilis transcribed RNA sequence (1)    | -                                                                                                                                                                                                                                                                                                                                                                                                                                               | Uncharacterised protein family, basic secretory protein [IPRO07541] (1)                                                                                                                                                                                                             | -                                  | C_ushii_02320_mRNA_4.1     | -                           |
| GF0042567 | 0                               | 1                       | 0                        | Hypothetical protein (1)                                 | -                                                                                                                                                                                                                                                                                                                                                                                                                                               | -                                                                                                                                                                                                                                                                                   | -                                  | C_ushii_02319_mRNA_2.1     | -                           |
| GF0042566 | 0                               | 1                       | 0                        | SH3 domain protein (1)                                   | -                                                                                                                                                                                                                                                                                                                                                                                                                                               | -                                                                                                                                                                                                                                                                                   | -                                  | C_ushii_02319_mRNA_1.1     | -                           |
| GF0042565 | 0                               | 1                       | 0                        | Hypothetical protein (1)                                 | -                                                                                                                                                                                                                                                                                                                                                                                                                                               | -                                                                                                                                                                                                                                                                                   | -                                  | C_ushii_02318_mRNA_2.1     | -                           |
| GF0042564 | 0                               | 1                       | 0                        | Hypothetical protein (1)                                 | -                                                                                                                                                                                                                                                                                                                                                                                                                                               | Retroransposon gag domain [IPRO05162] (1); Alpha Beta hydrolase fold [IPRO29058] (1); Alpha beta hydrolase fold-1 [IPRO06073] (1)                                                                                                                                                   | -                                  | C_ushii_02318_mRNA_1.1     | -                           |
| GF0042563 | 0                               | 1                       | 0                        | Methyl erastase 10, putative (1)                         | -                                                                                                                                                                                                                                                                                                                                                                                                                                               | -                                                                                                                                                                                                                                                                                   | -                                  | C_ushii_02316_mRNA_2.2     | -                           |
| GF0042562 | 0                               | 1                       | 0                        | Hypothetical protein (1)                                 | -                                                                                                                                                                                                                                                                                                                                                                                                                                               | -                                                                                                                                                                                                                                                                                   | -                                  | C_ushii_02316_mRNA_1.1     | -                           |
| GF0042561 | 0                               | 1                       | 0                        | Hypothetical protein (1)                                 | -                                                                                                                                                                                                                                                                                                                                                                                                                                               | Retroransposon gag domain [IPRO05162] (4)                                                                                                                                                                                                                                           | -                                  | C_ushii_02314_mRNA_6.1     | -                           |
| GF0042560 | 0                               | 1                       | 0                        | Hypothetical protein (1)                                 | -                                                                                                                                                                                                                                                                                                                                                                                                                                               | -                                                                                                                                                                                                                                                                                   | -                                  | C_ushii_02314_mRNA_5.1     | -                           |
| GF0042559 | 0                               | 1                       | 0                        | Hypothetical protein (1)                                 | -                                                                                                                                                                                                                                                                                                                                                                                                                                               | Retroransposon gag domain [IPRO05162] (4)                                                                                                                                                                                                                                           | -                                  | C_ushii_02314_mRNA_2.1     | -                           |
| GF0042558 | 0                               | 1                       | 0                        | Hypothetical protein (1)                                 | -                                                                                                                                                                                                                                                                                                                                                                                                                                               | -                                                                                                                                                                                                                                                                                   | -                                  | C_ushii_02313_mRNA_7.1     | -                           |
| GF0042557 | 0                               | 1                       | 0                        | Hypothetical protein (1)                                 | -                                                                                                                                                                                                                                                                                                                                                                                                                                               | -                                                                                                                                                                                                                                                                                   | -                                  | C_ushii_02313_mRNA_5.1     | -                           |
| GF0042556 | 0                               | 1                       | 0                        | Hypothetical protein (1)                                 | -                                                                                                                                                                                                                                                                                                                                                                                                                                               | -                                                                                                                                                                                                                                                                                   | -                                  | C_ushii_02313_mRNA_1.1     | -                           |
| GF0042555 | 0                               | 1                       | 0                        | Hypothetical protein (1)                                 | -                                                                                                                                                                                                                                                                                                                                                                                                                                               | -                                                                                                                                                                                                                                                                                   | -                                  | C_ushii_02312_mRNA_2.1     | -                           |
| GF0042554 | 0                               | 1                       | 0                        | Eustrin A-like, putative (1)                             | -                                                                                                                                                                                                                                                                                                                                                                                                                                               | PC-Esterase [IPRO26057] (1); Trichome binding-like family [IPRO29623] (1); PMRS N-terminal domain [IPRO25846] (1)                                                                                                                                                                   | -                                  | C_ushii_02312_mRNA_1.1     | -                           |
| GF0042553 | 0                               | 1                       | 0                        | Hypothetical protein (1)                                 | -                                                                                                                                                                                                                                                                                                                                                                                                                                               | Peptide repeat [IPRO2885] (1)                                                                                                                                                                                                                                                       | -                                  | C_ushii_02311_mRNA_4.1     | -                           |
| GF0042552 | 0                               | 1                       | 0                        | Hypothetical protein (1)                                 | -                                                                                                                                                                                                                                                                                                                                                                                                                                               | GH3 family [IPRO04993] (1)                                                                                                                                                                                                                                                          | -                                  | C_ushii_02311_mRNA_1.1     | -                           |
| GF0042551 | 0                               | 1                       | 0                        | Hypothetical protein (1)                                 | -                                                                                                                                                                                                                                                                                                                                                                                                                                               | -                                                                                                                                                                                                                                                                                   | -                                  | C_ushii_02310_mRNA_3.1     | -                           |
| GF0042550 | 0                               | 1                       | 0                        | Hypothetical protein (1)                                 | proteolysis [GO:0006508 biological_process] (1); cysteine-type peptidase activity [GO:0008234 molecular_function] (1)                                                                                                                                                                                                                                                                                                                           | Ulp1 protease family, C-terminal catalytic domain [IPRO03653] (1)                                                                                                                                                                                                                   | -                                  | C_ushii_02309_mRNA_2.1     | -                           |
| GF0042549 | 0                               | 1                       | 0                        | Hypothetical protein (1)                                 | -                                                                                                                                                                                                                                                                                                                                                                                                                                               | -                                                                                                                                                                                                                                                                                   | -                                  | C_ushii_02307_mRNA_3.1     | -                           |
| GF0042548 | 0                               | 1                       | 0                        | LRR receptor like kinase (1)                             | -                                                                                                                                                                                                                                                                                                                                                                                                                                               | Concanavalin A-like lectin/ghonase domain [IPRO1320] (1); Leucine-rich repeat domain, L domain-like [IPRO12675] (1); Protein kinase-like domain [IPRO11009] (1); Maleicin [IPRO1720] (1)                                                                                            | -                                  | C_ushii_02306_mRNA_2.1     | -                           |
| GF0042547 | 0                               | 1                       | 0                        | Scipin (1)                                               | lipid storage [GO:0019915 biological_process] (1); FMN binding [GO:0010181 molecular_function] (1); oxidoreductase activity [GO:0016497 molecular_function] (1); oxidation-reduction process [GO:0055114 biological_process] (1); catalytic activity [GO:0003524 molecular_function] (1)                                                                                                                                                        | Scipin family [IPRO09617] (1)                                                                                                                                                                                                                                                       | -                                  | C_ushii_02306_mRNA_1.1     | -                           |
| GF0042546 | 0                               | 1                       | 0                        | 12-oxophylloquinone reductase 2 (1)                      | -                                                                                                                                                                                                                                                                                                                                                                                                                                               | Aldehyde-type TDM barrel [IPRO11795] (1); NADH flavin oxidoreductase/NADH oxidase, N-terminal [IPRO01155] (1)                                                                                                                                                                       | -                                  | C_ushii_02305_mRNA_5.1     | -                           |
| GF0042545 | 0                               | 1                       | 0                        | Hypothetical protein (1)                                 | -                                                                                                                                                                                                                                                                                                                                                                                                                                               | -                                                                                                                                                                                                                                                                                   | -                                  | C_ushii_02305_mRNA_1.1     | -                           |
| GF0042544 | 0                               | 1                       | 0                        | Hypothetical protein (1)                                 | transporter activity [GO:0005215 molecular_function] (1); integral component of membrane [GO:0016021 cellular_component] (1); drug transmembrane transport [GO:0006855 biological_process] (1); membrane [GO:0016020 cellular_component] (1); drug transmembrane transporter activity [GO:0015238 molecular_function] (1); antiporter activity [GO:0015297 molecular_function] (1); transmembrane transport [GO:0050885 biological_process] (1) | Purine permease, plant [IPRO30182] (1)                                                                                                                                                                                                                                              | -                                  | C_ushii_02304_mRNA_5.1     | -                           |
| GF0042543 | 0                               | 1                       | 0                        | Hypothetical protein (1)                                 | -                                                                                                                                                                                                                                                                                                                                                                                                                                               | Multi antimicrobial extrusion protein [IPRO02528] (4)                                                                                                                                                                                                                               | -                                  | C_ushii_02304_mRNA_3.1     | -                           |
| GF0042542 | 0                               | 1                       | 0                        | Hypothetical protein (1)                                 | -                                                                                                                                                                                                                                                                                                                                                                                                                                               | Aspartate glutamate uridylylase kinase [IPRO01048] (4)                                                                                                                                                                                                                              | -                                  | C_ushii_02303_mRNA_4.1     | -                           |
| GF0042541 | 0                               | 1                       | 0                        | Hypothetical protein (1)                                 | -                                                                                                                                                                                                                                                                                                                                                                                                                                               | -                                                                                                                                                                                                                                                                                   | -                                  | C_ushii_02303_mRNA_1.1     | -                           |
| GF0042540 | 0                               | 1                       | 0                        | Hypothetical protein (1)                                 | -                                                                                                                                                                                                                                                                                                                                                                                                                                               | -                                                                                                                                                                                                                                                                                   | -                                  | C_ushii_02302_mRNA_1.1     | -                           |
| GF0042539 | 0                               | 1                       | 0                        | Hypothetical protein (1)                                 | -                                                                                                                                                                                                                                                                                                                                                                                                                                               | Thaumatin [IPRO01938] (1)                                                                                                                                                                                                                                                           | -                                  | C_ushii_02301_mRNA_3.1     | -                           |
| GF0042538 | 0                               | 1                       | 0                        | Hypothetical protein (1)                                 | -                                                                                                                                                                                                                                                                                                                                                                                                                                               | -                                                                                                                                                                                                                                                                                   | -                                  | C_ushii_02300_mRNA_3.1     | -                           |
| GF0042537 | 0                               | 1                       | 0                        | Hypothetical protein (1)                                 | -                                                                                                                                                                                                                                                                                                                                                                                                                                               | -                                                                                                                                                                                                                                                                                   | -                                  | C_ushii_02299_mRNA_4.1     | -                           |
| GF0042536 | 0                               | 1                       | 0                        | Hypothetical protein (1)                                 | -                                                                                                                                                                                                                                                                                                                                                                                                                                               | -                                                                                                                                                                                                                                                                                   | -                                  | C_ushii_02299_mRNA_2.1     | -                           |
| GF0042535 | 0                               | 1                       | 0                        | Hypothetical protein (1)                                 | -                                                                                                                                                                                                                                                                                                                                                                                                                                               | -                                                                                                                                                                                                                                                                                   | -                                  | C_ushii_02294_mRNA_1.1     | -                           |
| GF0042534 | 0                               | 1                       | 0                        | Hypothetical protein (1)                                 | -                                                                                                                                                                                                                                                                                                                                                                                                                                               | -                                                                                                                                                                                                                                                                                   | -                                  | C_ushii_02293_mRNA_9.1     | -                           |
| GF0042533 | 0                               | 1                       | 0                        | Hypothetical protein (1)                                 | -                                                                                                                                                                                                                                                                                                                                                                                                                                               | -                                                                                                                                                                                                                                                                                   | -                                  | C_ushii_02293_mRNA_7.1     | -                           |
| GF0042532 | 0                               | 1                       | 0                        | Hypothetical protein (1)                                 | -                                                                                                                                                                                                                                                                                                                                                                                                                                               | -                                                                                                                                                                                                                                                                                   | -                                  | C_ushii_02293_mRNA_6.1     | -                           |
| GF0042531 | 0                               | 1                       | 0                        | Hypothetical protein (1)                                 | -                                                                                                                                                                                                                                                                                                                                                                                                                                               | -                                                                                                                                                                                                                                                                                   | -                                  | C_ushii_02293_mRNA_5.1     | -                           |
| GF0042530 | 0                               | 1                       | 0                        | Hypothetical protein (1)                                 | -                                                                                                                                                                                                                                                                                                                                                                                                                                               | -                                                                                                                                                                                                                                                                                   | -                                  | C_ushii_02293_mRNA_1.1     | -                           |
| GF0042529 | 0                               | 1                       | 0                        | Hypothetical protein (1)                                 | -                                                                                                                                                                                                                                                                                                                                                                                                                                               | Bull-type lectin domain [IPRO1480] (1); NB-ARC [IPRO02182] (1); P-loop containing nucleoside triphosphate hydrolase [IPRO27417] (1)                                                                                                                                                 | -                                  | C_ushii_02290_mRNA_5.1     | -                           |
| GF0042528 | 0                               | 1                       | 0                        | NBS-LRR type disease resistance protein (1)              | ADP binding [GO:0043531 molecular_function] (1)                                                                                                                                                                                                                                                                                                                                                                                                 | -                                                                                                                                                                                                                                                                                   | -                                  | C_ushii_02290_mRNA_2.1     | -                           |
| GF0042527 | 0                               | 1                       | 0                        | Disease resistance protein (1)                           | ADP binding [GO:0043531 molecular_function] (1)                                                                                                                                                                                                                                                                                                                                                                                                 | P-loop containing nucleoside triphosphate hydrolase [IPRO27417] (1); NB-ARC [IPRO02182] (1)                                                                                                                                                                                         | -                                  | C_ushii_02290_mRNA_1.1     | -                           |
| GF0042526 | 0                               | 1                       | 0                        | Hypothetical protein (1)                                 | -                                                                                                                                                                                                                                                                                                                                                                                                                                               | -                                                                                                                                                                                                                                                                                   | -                                  | C_ushii_02289_mRNA_3.1     | -                           |
| GF0042525 | 0                               | 1                       | 0                        | Hypothetical protein (1)                                 | -                                                                                                                                                                                                                                                                                                                                                                                                                                               | -                                                                                                                                                                                                                                                                                   | -                                  | C_ushii_02289_mRNA_2.1     | -                           |
| GF0042524 | 0                               | 1                       | 0                        | Hypothetical protein (1)                                 | -                                                                                                                                                                                                                                                                                                                                                                                                                                               | -                                                                                                                                                                                                                                                                                   | -                                  | C_ushii_02286_mRNA_2.1     | -                           |
| GF0042523 | 0                               | 1                       | 0                        | Single hybrid motif superfamily protein isoform 1 (1)    | -                                                                                                                                                                                                                                                                                                                                                                                                                                               | Single hybrid motif [IPRO11053] (4)                                                                                                                                                                                                                                                 | -                                  | C_ushii_02285_mRNA_5.1     | -                           |
| GF0042522 | 0                               | 1                       | 0                        | Hypothetical protein (1)                                 | methyltransferase activity [GO:0008168 molecular_function] (1); protein methylation [GO:0006479 biological_process] (1)                                                                                                                                                                                                                                                                                                                         | Protein arginine N-methyltransferase [IPRO25799] (1)                                                                                                                                                                                                                                | -                                  | C_ushii_02284_mRNA_1.1     | -                           |
| GF0042521 | 0                               | 1                       | 0                        | Hypothetical protein (1)                                 | -                                                                                                                                                                                                                                                                                                                                                                                                                                               | -                                                                                                                                                                                                                                                                                   | -                                  | C_ushii_02280_mRNA_1.1     | -                           |
| GF0042520 | 0                               | 1                       | 0                        | Hypothetical protein (1)                                 | protein binding [GO:0005515 molecular_function] (1)                                                                                                                                                                                                                                                                                                                                                                                             | Leucine-rich repeat domain, L domain-like [IPRO2675] (1); Leucine-rich repeat, typical sub-type [IPRO03911] (1); Leucine-rich repeat-containing N-terminal, plant-type [IPRO15210] (1); Leucine-rich repeat [IPRO0161] (1)                                                          | -                                  | C_ushii_02279_mRNA_4.1     | -                           |
| GF0042519 | 0                               | 1                       | 0                        | Hypothetical protein (1)                                 | -                                                                                                                                                                                                                                                                                                                                                                                                                                               | MULE transposon domain [IPRO18289] (1)                                                                                                                                                                                                                                              | -                                  | C_ushii_02279_mRNA_3.1     | -                           |
| GF0042518 | 0                               | 1                       | 0                        | Hypothetical protein (1)                                 | regulation of transcription, DNA-templated [GO:0006355 biological_process] (1)                                                                                                                                                                                                                                                                                                                                                                  | FHY3/FAR1 family [IPRO1052] (1)                                                                                                                                                                                                                                                     | -                                  | C_ushii_02279_mRNA_1.1     | -                           |
| GF0042517 | 0                               | 1                       | 0                        | Hypothetical protein (1)                                 | -                                                                                                                                                                                                                                                                                                                                                                                                                                               | -                                                                                                                                                                                                                                                                                   | -                                  | C_ushii_02278_mRNA_5.1     | -                           |
| GF0042516 | 0                               | 1                       | 0                        | Hypothetical protein (1)                                 | -                                                                                                                                                                                                                                                                                                                                                                                                                                               | -                                                                                                                                                                                                                                                                                   | -                                  | C_ushii_02276_mRNA_6.1     | -                           |
| GF0042515 | 0                               | 1                       | 0                        | Hypothetical protein (1)                                 | -                                                                                                                                                                                                                                                                                                                                                                                                                                               | -                                                                                                                                                                                                                                                                                   | -                                  | C_ushii_02273_mRNA_2.1     | -                           |
| GF0042514 | 0                               | 1                       | 0                        | Hypothetical protein (1)                                 | -                                                                                                                                                                                                                                                                                                                                                                                                                                               | -                                                                                                                                                                                                                                                                                   | -                                  | C_ushii_02272_mRNA_4.1     | -                           |
| GF0042513 | 0                               | 1                       | 0                        | Hypothetical protein (1)                                 | -                                                                                                                                                                                                                                                                                                                                                                                                                                               | -                                                                                                                                                                                                                                                                                   | -                                  | C_ushii_02272_mRNA_3.1     | -                           |
| GF0042512 | 0                               | 1                       | 0                        | Hypothetical protein (1)                                 | -                                                                                                                                                                                                                                                                                                                                                                                                                                               | Reverse transcriptase, RNA-dependent DNA polymerase [IPRO13103] (1)                                                                                                                                                                                                                 | -                                  | C_ushii_02272_mRNA_1.1     | -                           |
| GF0042511 | 0                               | 1                       | 0                        | Ubiquitin carboxyl-terminal hydrolase 12 (1)             | protein binding [GO:0005515 molecular_function] (1)                                                                                                                                                                                                                                                                                                                                                                                             | TRAF-like [IPRO08974] (1); MATH TRAF domain [IPRO00083] (1)                                                                                                                                                                                                                         | -                                  | C_ushii_02271_mRNA_4.1     | -                           |
| GF0042510 | 0                               | 1                       | 0                        | Hypothetical protein (1)                                 | -                                                                                                                                                                                                                                                                                                                                                                                                                                               | -                                                                                                                                                                                                                                                                                   | -                                  | C_ushii_02270_mRNA_1.1     | -                           |
| GF0042509 | 0                               | 1                       | 0                        | Hypothetical protein (1)                                 | -                                                                                                                                                                                                                                                                                                                                                                                                                                               | -                                                                                                                                                                                                                                                                                   | -                                  | C_ushii_02269_mRNA_2.1     | -                           |
| GF0042508 | 0                               | 1                       | 0                        | DUF2351: family protein (1)                              | response to stress [GO:0006950 biological_process] (1); response to water [GO:0009415 biological_process] (1)                                                                                                                                                                                                                                                                                                                                   | Ubiquitin-conjugating enzyme E2-binding protein [IPRO19193] (1); Dehydrin, conserved site [IPRO30513] (1); Dehydrin [IPRO00167] (1)                                                                                                                                                 | -                                  | C_ushii_02267_mRNA_3.1     | -                           |
| GF0042507 | 0                               | 1                       | 0                        | Hypothetical protein (1)                                 | nucleic acid binding [GO:0003676 molecular_function] (1); zinc ion binding [GO:0008270 molecular_function] (1)                                                                                                                                                                                                                                                                                                                                  | Zinc finger, CCHC-type [IPRO01878] (1); Gag-glycoprotein of LTR coisotype [IPRO29472] (1)                                                                                                                                                                                           | -                                  | C_ushii_02266_mRNA_4.1     | -                           |
| GF0042506 | 0                               | 1                       | 0                        | Hypothetical protein (1)                                 | -                                                                                                                                                                                                                                                                                                                                                                                                                                               | -                                                                                                                                                                                                                                                                                   | -                                  | C_ushii_02266_mRNA_3.1     | -                           |
| GF0042505 | 0                               | 1                       | 0                        | Hypothetical protein (1)                                 | -                                                                                                                                                                                                                                                                                                                                                                                                                                               | -                                                                                                                                                                                                                                                                                   | -                                  | C_ushii_02266_mRNA_1.1     | -                           |
| GF0042504 | 0                               | 1                       | 0                        | Hypothetical protein (1)                                 | -                                                                                                                                                                                                                                                                                                                                                                                                                                               | -                                                                                                                                                                                                                                                                                   | -                                  | C_ushii_02265_mRNA_4.1     | -                           |
| GF0042503 | 0                               | 1                       | 0                        | Hypothetical protein (1)                                 | -                                                                                                                                                                                                                                                                                                                                                                                                                                               | -                                                                                                                                                                                                                                                                                   | -                                  | C_ushii_02264_mRNA_1.1     | -                           |
| GF0042502 | 0                               | 1                       | 0                        | E3 ubiquitin-protein ligase (1)                          | ubiquitin-dependent protein catabolic process [GO:000611 biological_process] (1); multicellular organismal development [GO:007275 biological_process] (1); nucleus [GO:0005634 cellular_component] (1); protein binding [GO:0005515 molecular_function] (1)                                                                                                                                                                                     | TRAF-like [IPRO08974] (1); E3 ubiquitin-protein ligase SIN-like protein, TRAF-like domain [IPRO18121] (1)                                                                                                                                                                           | -                                  | C_ushii_02263_mRNA_2.1     | -                           |
| GF0042501 | 0                               | 1                       | 0                        | Hypothetical protein (1)                                 | phosphoric ester hydrolase activity [GO:0042578 molecular_function] (1); protein binding [GO:0005515 molecular_function] (1)                                                                                                                                                                                                                                                                                                                    | WW domain [IPRO1202] (1); SAC domain [IPRO02013] (1)                                                                                                                                                                                                                                | -                                  | C_ushii_02262_mRNA_3.1     | -                           |
| GF0042500 | 0                               | 1                       | 0                        | Ubiquitin carboxyl-terminal hydrolase family protein (1) | -                                                                                                                                                                                                                                                                                                                                                                                                                                               | Plant organellar RNA recognition domain [IPRO21099] (1)                                                                                                                                                                                                                             | -                                  | C_ushii_02259_mRNA_4.1     | -                           |
| GF0042499 | 0                               | 1                       | 0                        | Hypothetical protein (1)                                 | -                                                                                                                                                                                                                                                                                                                                                                                                                                               | -                                                                                                                                                                                                                                                                                   | -                                  | C_ushii_02258_mRNA_1.1     | -                           |

| ID        | Num. in C. crottenstei | Num. in C. auris | Num. in P. putida | Note                                                                                    | GO                                                                                                                                                                                                                                                                                                                                                                                                           | InterPro                                                                                                                                                                                                                                                                                                                                                                                                                                | Members in C. crottenstei | Members in C. auris    | Members in P. putida |
|-----------|------------------------|------------------|-------------------|-----------------------------------------------------------------------------------------|--------------------------------------------------------------------------------------------------------------------------------------------------------------------------------------------------------------------------------------------------------------------------------------------------------------------------------------------------------------------------------------------------------------|-----------------------------------------------------------------------------------------------------------------------------------------------------------------------------------------------------------------------------------------------------------------------------------------------------------------------------------------------------------------------------------------------------------------------------------------|---------------------------|------------------------|----------------------|
| GF0042498 | 0                      | 1                | 1                 | 0 Putative ternary complex factor MIP1 (1)                                              |                                                                                                                                                                                                                                                                                                                                                                                                              | Domain of unknown function DU547 [IPR006601] (1); Ternary complex factor MIP1, leucine-zipper [IPR025757] (1)                                                                                                                                                                                                                                                                                                                           |                           | C_ushii_02251_mRNA_3,1 | -                    |
| GF0042497 | 0                      | 1                | 1                 | 0 Hypothetical protein (1)                                                              |                                                                                                                                                                                                                                                                                                                                                                                                              |                                                                                                                                                                                                                                                                                                                                                                                                                                         |                           | C_ushii_02256_mRNA_4,1 | -                    |
| GF0042496 | 0                      | 1                | 1                 | 0 Hypothetical protein (1)                                                              |                                                                                                                                                                                                                                                                                                                                                                                                              |                                                                                                                                                                                                                                                                                                                                                                                                                                         |                           | C_ushii_02256_mRNA_3,1 | -                    |
| GF0042495 | 0                      | 1                | 1                 | 0 Hypothetical protein (1)                                                              |                                                                                                                                                                                                                                                                                                                                                                                                              | LOG family [IPR031100] (1)                                                                                                                                                                                                                                                                                                                                                                                                              |                           | C_ushii_02255_mRNA_3,1 | -                    |
| GF0042494 | 0                      | 1                | 1                 | 0 Hypothetical protein (1)                                                              |                                                                                                                                                                                                                                                                                                                                                                                                              |                                                                                                                                                                                                                                                                                                                                                                                                                                         |                           | C_ushii_02255_mRNA_1,1 | -                    |
| GF0042493 | 0                      | 1                | 1                 | 0 Hypothetical protein (1)                                                              | protein binding [GO:0005515 molecular_function] (1)                                                                                                                                                                                                                                                                                                                                                          | Tetrapeptide-like helical domain [IPR011990] (1); Elongated TPR repeat-containing domain [IPR025144] (1)                                                                                                                                                                                                                                                                                                                                |                           | C_ushii_02252_mRNA_7,1 | -                    |
| GF0042492 | 0                      | 1                | 1                 | 0 Hypothetical protein (1)                                                              |                                                                                                                                                                                                                                                                                                                                                                                                              |                                                                                                                                                                                                                                                                                                                                                                                                                                         |                           | C_ushii_02252_mRNA_1,1 | -                    |
| GF0042491 | 0                      | 1                | 1                 | 0 Hypothetical protein (1)                                                              | protein dimerization activity [GO:0046983 molecular_function] (1); nucleic acid binding [GO:0003676 molecular_function] (1)                                                                                                                                                                                                                                                                                  | HAT, C-terminal dimerization domain [IPR008906] (1); Ribonuclease H-like domain [IPR012537] (1)                                                                                                                                                                                                                                                                                                                                         |                           | C_ushii_02251_mRNA_3,1 | -                    |
| GF0042490 | 0                      | 1                | 1                 | 0 Hypothetical protein (1)                                                              |                                                                                                                                                                                                                                                                                                                                                                                                              |                                                                                                                                                                                                                                                                                                                                                                                                                                         |                           | C_ushii_02250_mRNA_1,1 | -                    |
| GF0042489 | 0                      | 1                | 1                 | 0 Hypothetical protein (1)                                                              |                                                                                                                                                                                                                                                                                                                                                                                                              |                                                                                                                                                                                                                                                                                                                                                                                                                                         |                           | C_ushii_02248_mRNA_2,1 | -                    |
| GF0042488 | 0                      | 1                | 1                 | 0 Hypothetical protein (1)                                                              |                                                                                                                                                                                                                                                                                                                                                                                                              |                                                                                                                                                                                                                                                                                                                                                                                                                                         |                           | C_ushii_02248_mRNA_1,1 | -                    |
| GF0042487 | 0                      | 1                | 1                 | 0 Hypothetical protein (1)                                                              |                                                                                                                                                                                                                                                                                                                                                                                                              |                                                                                                                                                                                                                                                                                                                                                                                                                                         |                           | C_ushii_02247_mRNA_4,1 | -                    |
| GF0042486 | 0                      | 1                | 1                 | 0 Hypothetical protein (1)                                                              |                                                                                                                                                                                                                                                                                                                                                                                                              |                                                                                                                                                                                                                                                                                                                                                                                                                                         |                           | C_ushii_02247_mRNA_3,1 | -                    |
| GF0042485 | 0                      | 1                | 1                 | 0 Hypothetical protein (1)                                                              | endopeptidase inhibitor activity [GO:0004866 molecular_function] (1)                                                                                                                                                                                                                                                                                                                                         | Proteinase inhibitor 13, Kunitz legume [IPR021601] (1); Kunitz inhibitor ST1-like [IPR011065] (1)                                                                                                                                                                                                                                                                                                                                       |                           | C_ushii_02247_mRNA_1,1 | -                    |
| GF0042484 | 0                      | 1                | 1                 | 0 Hypothetical protein (1)                                                              |                                                                                                                                                                                                                                                                                                                                                                                                              |                                                                                                                                                                                                                                                                                                                                                                                                                                         |                           | C_ushii_02246_mRNA_4,1 | -                    |
| GF0042483 | 0                      | 1                | 1                 | 0 Hypothetical protein (1)                                                              |                                                                                                                                                                                                                                                                                                                                                                                                              |                                                                                                                                                                                                                                                                                                                                                                                                                                         |                           | C_ushii_02246_mRNA_2,1 | -                    |
| GF0042482 | 0                      | 1                | 1                 | 0 Hypothetical protein (1)                                                              |                                                                                                                                                                                                                                                                                                                                                                                                              |                                                                                                                                                                                                                                                                                                                                                                                                                                         |                           | C_ushii_02245_mRNA_3,1 | -                    |
| GF0042481 | 0                      | 1                | 1                 | 0 Putative disease resistance RGAI (1)                                                  |                                                                                                                                                                                                                                                                                                                                                                                                              | Leucine-rich repeat domain, I domain-like [IPR021675] (1)                                                                                                                                                                                                                                                                                                                                                                               |                           | C_ushii_02245_mRNA_2,1 | -                    |
| GF0042480 | 0                      | 1                | 1                 | 0 Hypothetical protein (1)                                                              |                                                                                                                                                                                                                                                                                                                                                                                                              |                                                                                                                                                                                                                                                                                                                                                                                                                                         |                           | C_ushii_02245_mRNA_1,1 | -                    |
| GF0042479 | 0                      | 1                | 1                 | 0 Isopecillin N quinazone (1)                                                           | catalytic activity [GO:0003824 molecular_function] (1)                                                                                                                                                                                                                                                                                                                                                       | Pyridoxal phosphate-dependent transferase, major region, subdomain 1 [IPR015411] (1); Pyridoxal phosphate-dependent transferase [IPR015424] (1)                                                                                                                                                                                                                                                                                         |                           | C_ushii_02244_mRNA_1,1 | -                    |
| GF0042478 | 0                      | 1                | 1                 | 0 Hypothetical protein (1)                                                              |                                                                                                                                                                                                                                                                                                                                                                                                              |                                                                                                                                                                                                                                                                                                                                                                                                                                         |                           | C_ushii_02243_mRNA_3,1 | -                    |
| GF0042477 | 0                      | 1                | 1                 | 0 Hypothetical protein (1)                                                              |                                                                                                                                                                                                                                                                                                                                                                                                              | Ribosomal protein S5 domain 2-type 6k4 [IPR020568] (1); Ribosomal protein S5 domain 2-type 6k4, subgroup [IPR014721] (1)                                                                                                                                                                                                                                                                                                                |                           | C_ushii_02243_mRNA_1,1 | -                    |
| GF0042476 | 0                      | 1                | 1                 | 0 Sugar transporter (1)                                                                 | transmembrane transport [GO:0055085 biological_process] (1); transporter activity [GO:0002115 molecular_function] (1); membrane [GO:0016020 cellular_component] (1); transmembrane transporter activity [GO:0022857 molecular_function] (1); substrate-specific transmembrane transporter activity [GO:0022891 molecular_function] (1); integral component of membrane [GO:0016021 cellular_component] (1)   | Major facilitator, sugar transporter-like [IPR005828] (1); Sugar transport, conserved site [IPR005829] (1); Major facilitator superfamily domain [IPR028846] (1)                                                                                                                                                                                                                                                                        |                           | C_ushii_02242_mRNA_1,1 | -                    |
| GF0042475 | 0                      | 1                | 1                 | 0 Hypothetical protein (1)                                                              |                                                                                                                                                                                                                                                                                                                                                                                                              |                                                                                                                                                                                                                                                                                                                                                                                                                                         |                           | C_ushii_02240_mRNA_6,1 | -                    |
| GF0042474 | 0                      | 1                | 1                 | 0 Hypothetical protein (1)                                                              | ADP binding [GO:0043531 molecular_function] (1)                                                                                                                                                                                                                                                                                                                                                              | P-loop containing nucleoside triphosphate hydrolase [IPR027471] (1); Ntr-ABC [IPR021812] (1); Reverse transcriptase zinc-binding domain [IPR020960] (1)                                                                                                                                                                                                                                                                                 |                           | C_ushii_02240_mRNA_1,1 | -                    |
| GF0042473 | 0                      | 1                | 1                 | 0 Hypothetical protein (1)                                                              |                                                                                                                                                                                                                                                                                                                                                                                                              | Nsp domain [IPR020687] (1)                                                                                                                                                                                                                                                                                                                                                                                                              |                           | C_ushii_02239_mRNA_4,1 | -                    |
| GF0042472 | 0                      | 1                | 1                 | 0 Hypothetical protein (1)                                                              |                                                                                                                                                                                                                                                                                                                                                                                                              |                                                                                                                                                                                                                                                                                                                                                                                                                                         |                           | C_ushii_02239_mRNA_1,1 | -                    |
| GF0042471 | 0                      | 1                | 1                 | 0 Hypothetical protein (1)                                                              |                                                                                                                                                                                                                                                                                                                                                                                                              |                                                                                                                                                                                                                                                                                                                                                                                                                                         |                           | C_ushii_02238_mRNA_2,1 | -                    |
| GF0042470 | 0                      | 1                | 1                 | 0 Leucine-rich repeat protein kinase family protein (1)                                 |                                                                                                                                                                                                                                                                                                                                                                                                              | Leucine-rich repeat, typical subtype [IPR003911] (1); Leucine-rich repeat domain, I domain-like [IPR021675] (1); Leucine-rich repeat-containing N-terminal, plant-type [IPR012101] (1)                                                                                                                                                                                                                                                  |                           | C_ushii_02238_mRNA_1,1 | -                    |
| GF0042469 | 0                      | 1                | 1                 | 0 Hypothetical protein (1)                                                              |                                                                                                                                                                                                                                                                                                                                                                                                              |                                                                                                                                                                                                                                                                                                                                                                                                                                         |                           | C_ushii_02237_mRNA_1,1 | -                    |
| GF0042468 | 0                      | 1                | 1                 | 0 Hypothetical protein (1)                                                              |                                                                                                                                                                                                                                                                                                                                                                                                              | Ribosomal protein S5 domain 2-type 6k4, subgroup [IPR014721] (1)                                                                                                                                                                                                                                                                                                                                                                        |                           | C_ushii_02235_mRNA_2,1 | -                    |
| GF0042467 | 0                      | 1                | 1                 | 0 Hypothetical protein (1)                                                              |                                                                                                                                                                                                                                                                                                                                                                                                              |                                                                                                                                                                                                                                                                                                                                                                                                                                         |                           | C_ushii_02235_mRNA_1,1 | -                    |
| GF0042466 | 0                      | 1                | 1                 | 0 Hypothetical protein (1)                                                              |                                                                                                                                                                                                                                                                                                                                                                                                              |                                                                                                                                                                                                                                                                                                                                                                                                                                         |                           | C_ushii_02233_mRNA_1,1 | -                    |
| GF0042465 | 0                      | 1                | 1                 | 0 Hypothetical protein (1)                                                              |                                                                                                                                                                                                                                                                                                                                                                                                              | Transposase, MuDR, plant [IPR004332] (1)                                                                                                                                                                                                                                                                                                                                                                                                |                           | C_ushii_02230_mRNA_3,1 | -                    |
| GF0042464 | 0                      | 1                | 1                 | 0 Hypothetical protein (1)                                                              |                                                                                                                                                                                                                                                                                                                                                                                                              |                                                                                                                                                                                                                                                                                                                                                                                                                                         |                           | C_ushii_02230_mRNA_1,1 | -                    |
| GF0042463 | 0                      | 1                | 1                 | 0 Hypothetical protein (1)                                                              |                                                                                                                                                                                                                                                                                                                                                                                                              |                                                                                                                                                                                                                                                                                                                                                                                                                                         |                           | C_ushii_02229_mRNA_5,1 | -                    |
| GF0042462 | 0                      | 1                | 1                 | 0 Putative retrocristin polypeptide (1)                                                 |                                                                                                                                                                                                                                                                                                                                                                                                              | Gag-polypeptide LTR copia-type [IPR028472] (1)                                                                                                                                                                                                                                                                                                                                                                                          |                           | C_ushii_02229_mRNA_2,1 | -                    |
| GF0042461 | 0                      | 1                | 1                 | 0 Hypothetical protein (1)                                                              |                                                                                                                                                                                                                                                                                                                                                                                                              |                                                                                                                                                                                                                                                                                                                                                                                                                                         |                           | C_ushii_02228_mRNA_2,1 | -                    |
| GF0042460 | 0                      | 1                | 1                 | 0 Disease resistance protein (1)                                                        |                                                                                                                                                                                                                                                                                                                                                                                                              | Leucine-rich repeat domain, I domain-like [IPR021675] (1)                                                                                                                                                                                                                                                                                                                                                                               |                           | C_ushii_02228_mRNA_1,1 | -                    |
| GF0042459 | 0                      | 1                | 1                 | 0 Hypothetical protein (1)                                                              |                                                                                                                                                                                                                                                                                                                                                                                                              |                                                                                                                                                                                                                                                                                                                                                                                                                                         |                           | C_ushii_02227_mRNA_3,1 | -                    |
| GF0042458 | 0                      | 1                | 1                 | 0 Hypothetical protein (1)                                                              |                                                                                                                                                                                                                                                                                                                                                                                                              |                                                                                                                                                                                                                                                                                                                                                                                                                                         |                           | C_ushii_02227_mRNA_2,1 | -                    |
| GF0042457 | 0                      | 1                | 1                 | 0 Hypothetical protein (1)                                                              |                                                                                                                                                                                                                                                                                                                                                                                                              |                                                                                                                                                                                                                                                                                                                                                                                                                                         |                           | C_ushii_02225_mRNA_2,1 | -                    |
| GF0042456 | 0                      | 1                | 1                 | 0 Leucine-rich repeat receptor-like serine/threonine/tyrosine-protein kinase SOBIR1 (1) | ATP binding [GO:0005524 molecular_function] (1); protein kinase activity [GO:0004672 molecular_function] (1); protein phosphorylation [GO:0006468 biological_process] (1)                                                                                                                                                                                                                                    | Protein kinase domain [IPR000719] (1); Protein kinase-like domain [IPR011099] (1); Serine/threonine/tyrosine protein kinase, catalytic domain [IPR029290] (1); Serine/threonine protein kinase, active site [IPR008271] (1)                                                                                                                                                                                                             |                           | C_ushii_02225_mRNA_1,1 | -                    |
| GF0042455 | 0                      | 1                | 1                 | 0 Hypothetical protein (1)                                                              |                                                                                                                                                                                                                                                                                                                                                                                                              |                                                                                                                                                                                                                                                                                                                                                                                                                                         |                           | C_ushii_02223_mRNA_2,1 | -                    |
| GF0042454 | 0                      | 1                | 1                 | 0 Hypothetical protein (1)                                                              | translation release factor activity [GO:0003547 molecular_function] (1); translational termination [GO:0006415 biological_process] (1)                                                                                                                                                                                                                                                                       | Double-stranded RNA-binding domain [IPR014720] (1); Peptide chain release factor class I class II [IPR000352] (1)                                                                                                                                                                                                                                                                                                                       |                           | C_ushii_02223_mRNA_1,1 | -                    |
| GF0042453 | 0                      | 1                | 1                 | 0 Hypothetical protein (1)                                                              |                                                                                                                                                                                                                                                                                                                                                                                                              |                                                                                                                                                                                                                                                                                                                                                                                                                                         |                           | C_ushii_02222_mRNA_1,1 | -                    |
| GF0042452 | 0                      | 1                | 1                 | 0 Hypothetical protein (1)                                                              |                                                                                                                                                                                                                                                                                                                                                                                                              | LOG family [IPR031100] (1)                                                                                                                                                                                                                                                                                                                                                                                                              |                           | C_ushii_02221_mRNA_1,1 | -                    |
| GF0042451 | 0                      | 1                | 1                 | 0 Hypothetical protein (1)                                                              |                                                                                                                                                                                                                                                                                                                                                                                                              | Protein of unknown function DJF966 [IPR010369] (1)                                                                                                                                                                                                                                                                                                                                                                                      |                           | C_ushii_02220_mRNA_4,1 | -                    |
| GF0042450 | 0                      | 1                | 1                 | 0 Hypothetical protein (1)                                                              |                                                                                                                                                                                                                                                                                                                                                                                                              |                                                                                                                                                                                                                                                                                                                                                                                                                                         |                           | C_ushii_02218_mRNA_3,1 | -                    |
| GF0042449 | 0                      | 1                | 1                 | 0 Phosphoprotein phosphatase (1)                                                        |                                                                                                                                                                                                                                                                                                                                                                                                              | Leucine-rich repeat domain, I domain-like [IPR021675] (1)                                                                                                                                                                                                                                                                                                                                                                               |                           | C_ushii_02218_mRNA_2,1 | -                    |
| GF0042448 | 0                      | 1                | 1                 | 0 Hypothetical protein (1)                                                              |                                                                                                                                                                                                                                                                                                                                                                                                              |                                                                                                                                                                                                                                                                                                                                                                                                                                         |                           | C_ushii_02217_mRNA_2,1 | -                    |
| GF0042447 | 0                      | 1                | 1                 | 0 RNA polymerase II ctd phosphatase-like protein (1)                                    |                                                                                                                                                                                                                                                                                                                                                                                                              | HAD-like domain [IPR021214] (1); BRCT domain [IPR001357] (1); PCP1 homology domain [IPR004274] (1)                                                                                                                                                                                                                                                                                                                                      |                           | C_ushii_02217_mRNA_1,1 | -                    |
| GF0042446 | 0                      | 1                | 1                 | 0 Hypothetical protein (1)                                                              |                                                                                                                                                                                                                                                                                                                                                                                                              |                                                                                                                                                                                                                                                                                                                                                                                                                                         |                           | C_ushii_02213_mRNA_3,1 | -                    |
| GF0042445 | 0                      | 1                | 1                 | 0 Hypothetical protein (1)                                                              |                                                                                                                                                                                                                                                                                                                                                                                                              |                                                                                                                                                                                                                                                                                                                                                                                                                                         |                           | C_ushii_02213_mRNA_1,1 | -                    |
| GF0042444 | 0                      | 1                | 1                 | 0 Hypothetical protein (1)                                                              |                                                                                                                                                                                                                                                                                                                                                                                                              |                                                                                                                                                                                                                                                                                                                                                                                                                                         |                           | C_ushii_02212_mRNA_6,1 | -                    |
| GF0042443 | 0                      | 1                | 1                 | 0 Hypothetical protein (1)                                                              |                                                                                                                                                                                                                                                                                                                                                                                                              |                                                                                                                                                                                                                                                                                                                                                                                                                                         |                           | C_ushii_02212_mRNA_5,1 | -                    |
| GF0042442 | 0                      | 1                | 1                 | 0 Hypothetical protein (1)                                                              |                                                                                                                                                                                                                                                                                                                                                                                                              | Reverse transcriptase zinc-binding domain [IPR026960] (1)                                                                                                                                                                                                                                                                                                                                                                               |                           | C_ushii_02212_mRNA_4,1 | -                    |
| GF0042441 | 0                      | 1                | 1                 | 0 Hypothetical protein (1)                                                              |                                                                                                                                                                                                                                                                                                                                                                                                              |                                                                                                                                                                                                                                                                                                                                                                                                                                         |                           | C_ushii_02211_mRNA_8,1 | -                    |
| GF0042440 | 0                      | 1                | 1                 | 0 Hypothetical protein (1)                                                              |                                                                                                                                                                                                                                                                                                                                                                                                              |                                                                                                                                                                                                                                                                                                                                                                                                                                         |                           | C_ushii_02211_mRNA_7,1 | -                    |
| GF0042439 | 0                      | 1                | 1                 | 0 Hypothetical protein (1)                                                              | membrane [GO:0016020 cellular_component] (1); ammonium transport [GO:0015696 biological_process] (1); ammonium transmembrane transporter activity [GO:0008519 molecular_function] (1); ammonium transmembrane transport [GO:0072488 biological_process] (1); monolayer-surrounded lipid storage body [GO:0012511 cellular_component] (1); integral component of membrane [GO:0016021 cellular_component] (1) | Ammonium transporter [IPR001905] (1); Ammonium transporter, conserved site [IPR010407] (1); Ammonium urea transporter [IPR029291] (1); Ammonium transporter AnuB-like domain [IPR024041] (1)                                                                                                                                                                                                                                            |                           | C_ushii_02210_mRNA_1,1 | -                    |
| GF0042438 | 0                      | 1                | 1                 | 0 Oleosin (1)                                                                           |                                                                                                                                                                                                                                                                                                                                                                                                              |                                                                                                                                                                                                                                                                                                                                                                                                                                         |                           | C_ushii_02209_mRNA_3,1 | -                    |
| GF0042437 | 0                      | 1                | 1                 | 0 Hypothetical protein (1)                                                              |                                                                                                                                                                                                                                                                                                                                                                                                              |                                                                                                                                                                                                                                                                                                                                                                                                                                         |                           | C_ushii_02208_mRNA_3,1 | -                    |
| GF0042436 | 0                      | 1                | 1                 | 0 Hypothetical protein (1)                                                              | protein binding [GO:0005515 molecular_function] (1)                                                                                                                                                                                                                                                                                                                                                          | Post-SET domain [IPR006161] (1); SET domain [IPR001214] (1)                                                                                                                                                                                                                                                                                                                                                                             |                           | C_ushii_02207_mRNA_3,1 | -                    |
| GF0042435 | 0                      | 1                | 1                 | 0 Eukaryotic factor 2 (1)                                                               | GTP binding [GO:0005525 molecular_function] (1)                                                                                                                                                                                                                                                                                                                                                              | Ribosomal protein S5 domain 2-type 6k4, subgroup [IPR014721] (1); Translation elongation factor EFG, V domain [IPR006461] (1); Translation protein, beta-barrel domain [IPR009000] (1); Translation elongation factor EFG, EF2, domain IV [IPR005571] (1); Ribosomal protein S5 domain 2-type fold [IPR020568] (1); Translation elongation factor EFG, EFA, domain 2 [IPR004161] (1); Eukaryotic factor G, III-V domain [IPR009022] (1) |                           | C_ushii_02207_mRNA_1,1 | -                    |
| GF0042434 | 0                      | 1                | 1                 | 0 Hypothetical protein (1)                                                              |                                                                                                                                                                                                                                                                                                                                                                                                              |                                                                                                                                                                                                                                                                                                                                                                                                                                         |                           | C_ushii_02206_mRNA_4,1 | -                    |
| GF0042433 | 0                      | 1                | 1                 | 0 Hypothetical protein (1)                                                              |                                                                                                                                                                                                                                                                                                                                                                                                              |                                                                                                                                                                                                                                                                                                                                                                                                                                         |                           | C_ushii_02206_mRNA_3,1 | -                    |
| GF0042432 | 0                      | 1                | 1                 | 0 Hypothetical protein (1)                                                              |                                                                                                                                                                                                                                                                                                                                                                                                              |                                                                                                                                                                                                                                                                                                                                                                                                                                         |                           | C_ushii_02204_mRNA_5,1 | -                    |
| GF0042431 | 0                      | 1                | 1                 | 0 Hypothetical protein (1)                                                              |                                                                                                                                                                                                                                                                                                                                                                                                              |                                                                                                                                                                                                                                                                                                                                                                                                                                         |                           | C_ushii_02204_mRNA_4,1 | -                    |
| GF0042430 | 0                      | 1                | 1                 | 0 Hypothetical protein (1)                                                              | ATP binding [GO:0005524 molecular_function] (1)                                                                                                                                                                                                                                                                                                                                                              | Chaperonin Cpn60/TCP-1 family [IPR024213] (1); GroEL-like equatorial domain [IPR027413] (1); Chaperone nucleic acid complex polypeptide 1 (TCP-1) [IPR017990] (1)                                                                                                                                                                                                                                                                       |                           | C_ushii_02204_mRNA_3,1 | -                    |
| GF0042429 | 0                      | 1                | 1                 | 0 Hypothetical protein (1)                                                              |                                                                                                                                                                                                                                                                                                                                                                                                              |                                                                                                                                                                                                                                                                                                                                                                                                                                         |                           | C_ushii_02201_mRNA_2,1 | -                    |
| GF0042428 | 0                      | 1                | 1                 | 0 Hypothetical protein (1)                                                              | metal ion binding [GO:0046872 molecular_function] (1); nucleic acid binding [GO:0003676 molecular_function] (1)                                                                                                                                                                                                                                                                                              | Zinc finger C2H2-type/integrase DNA-binding domain [IPR013801] (1); Zinc finger, C2H2-like [IPR015880] (1); Zinc finger, C2H2 [IPR007087] (1)                                                                                                                                                                                                                                                                                           |                           | C_ushii_02200_mRNA_6,1 | -                    |
| GF0042427 | 0                      | 1                | 1                 | 0 Hypothetical protein (1)                                                              |                                                                                                                                                                                                                                                                                                                                                                                                              |                                                                                                                                                                                                                                                                                                                                                                                                                                         |                           | C_ushii_02200_mRNA_5,1 | -                    |
| GF0042426 | 0                      | 1                | 1                 | 0 Hypothetical protein (1)                                                              |                                                                                                                                                                                                                                                                                                                                                                                                              | Pentapeptide repeat [IPR002885] (1); Pentapeptide repeat [IPR002885] (1); Tetrapeptide-like helical domain [IPR011990] (1)                                                                                                                                                                                                                                                                                                              |                           | C_ushii_02200_mRNA_4,1 | -                    |
| GF0042425 | 0                      | 1                | 1                 | 0 Putative pentaricopeptide repeat domain containing protein (1)                        | protein binding [GO:0005515 molecular_function] (1)                                                                                                                                                                                                                                                                                                                                                          |                                                                                                                                                                                                                                                                                                                                                                                                                                         |                           | C_ushii_02200_mRNA_3,1 | -                    |
| GF0042424 | 0                      | 1                | 1                 | 0 Hypothetical protein (1)                                                              | ATPase activity [GO:0016887 molecular_function] (1); ATP binding [GO:0005524 molecular_function] (1)                                                                                                                                                                                                                                                                                                         | Active-site region ATPase-like domain [IPR025723] (1); P-loop containing nucleoside triphosphate hydrolase [IPR027471] (1); Chemical pump ATPase, AnuA/GUT3 [IPR016300] (1)                                                                                                                                                                                                                                                             |                           | C_ushii_02200_mRNA_1,1 | -                    |
| GF0042423 | 0                      | 1                | 1                 | 0 Hypothetical protein (1)                                                              |                                                                                                                                                                                                                                                                                                                                                                                                              |                                                                                                                                                                                                                                                                                                                                                                                                                                         |                           | C_ushii_02199_mRNA_1,1 | -                    |

| ID        | Num. in <i>C. crotolariae</i> | Num. in <i>C. canadensis</i> | Num. in <i>P. trifidatus</i> | Term                                                                                         | GO                                                                                                                                                                                                                                                                                                                                               | InterPro                                                                                                                                                                                                                                                                                                                                                                                                 | Members in <i>C. crotolariae</i> | Members in <i>C. canadensis</i> | Members in <i>P. trifidatus</i> |
|-----------|-------------------------------|------------------------------|------------------------------|----------------------------------------------------------------------------------------------|--------------------------------------------------------------------------------------------------------------------------------------------------------------------------------------------------------------------------------------------------------------------------------------------------------------------------------------------------|----------------------------------------------------------------------------------------------------------------------------------------------------------------------------------------------------------------------------------------------------------------------------------------------------------------------------------------------------------------------------------------------------------|----------------------------------|---------------------------------|---------------------------------|
| GF0042422 | 0                             | 1                            | 0                            | 0 Pectin acetyltransferase (1)                                                               | hydrolase activity [GO:0016787 molecular_function] (1)                                                                                                                                                                                                                                                                                           | Alpha beta hydrolase fold [IPR029058] (1); Pectinacetyltransferase-NCTU34 [IPR004963] (1)                                                                                                                                                                                                                                                                                                                | -                                | C_umh19_02197_mRNA_2,1          | -                               |
| GF0042421 | 0                             | 1                            | 0                            | 0 Calcium-binding protein CML38 (1)                                                          | calcium ion binding [GO:0005509 molecular_function] (1)                                                                                                                                                                                                                                                                                          | EF-hand domain pair [IPR011992] (1); EF-hand 1, calcium-binding site [IPR018247] (1); EF-hand domain [IPR002048] (1)                                                                                                                                                                                                                                                                                     | -                                | C_umh19_02196_mRNA_3,1          | -                               |
| GF0042420 | 0                             | 1                            | 0                            | 0 Hypothetical protein (1)                                                                   | ATP binding [GO:0005524 molecular_function] (1); protein phosphorylation [GO:0006468 biological_process] (1); protein kinase activity [GO:0004672 molecular_function] (1)                                                                                                                                                                        | Protein kinase-like domain [IPR011009] (1); Protein kinase domain [IPR000719] (1)                                                                                                                                                                                                                                                                                                                        | -                                | C_umh19_02196_mRNA_4,1          | -                               |
| GF0042419 | 0                             | 1                            | 0                            | 0 Kinase family protein / peptidoglycan-binding LyxM domain-containing protein, putative (1) |                                                                                                                                                                                                                                                                                                                                                  | Concavulin A-like lectin/glycanase domain [IPR013320] (1); LyxM domain [IPR018322] (1)                                                                                                                                                                                                                                                                                                                   | -                                | C_umh19_02196_mRNA_3,1          | -                               |
| GF0042418 | 0                             | 1                            | 0                            | 0 Hypothetical protein (1)                                                                   | oxidoreductase activity [GO:0016491 molecular_function] (1); ADP binding [GO:004531 molecular_function] (1); binding [GO:0005488 molecular_function] (1); protein binding [GO:0005515 molecular_function] (1)                                                                                                                                    | Leucine-rich repeat domain, L domain-oxidation-reduction process [GO:0055114 biological_process] (1); Arma-like [IPR029275] (1); Arma-like [IPR002251] (1); Arma oxidase [IPR002937] (1); Arma-like helical [IPR011999] (1); FAD/NAD(P)-binding domain [IPR027531] (1); NB-ARC [IPR002182] (1); Arma-like-type fold [IPR016024] (1); P-loop containing nucleoside triphosphate hydrolase [IPR027417] (1) | -                                | C_umh19_02195_mRNA_1,1          | -                               |
| GF0042417 | 0                             | 1                            | 0                            | 0 Hypothetical protein (1)                                                                   |                                                                                                                                                                                                                                                                                                                                                  |                                                                                                                                                                                                                                                                                                                                                                                                          | -                                | C_umh19_02193_mRNA_2,1          | -                               |
| GF0042416 | 0                             | 1                            | 0                            | 0 Hypothetical protein (1)                                                                   |                                                                                                                                                                                                                                                                                                                                                  |                                                                                                                                                                                                                                                                                                                                                                                                          | -                                | C_umh19_02192_mRNA_1,1          | -                               |
| GF0042415 | 0                             | 1                            | 0                            | 0 Hypothetical protein (1)                                                                   |                                                                                                                                                                                                                                                                                                                                                  |                                                                                                                                                                                                                                                                                                                                                                                                          | -                                | C_umh19_02192_mRNA_2,1          | -                               |
| GF0042414 | 0                             | 1                            | 0                            | 0 Hypothetical protein (1)                                                                   |                                                                                                                                                                                                                                                                                                                                                  |                                                                                                                                                                                                                                                                                                                                                                                                          | -                                | C_umh19_02191_mRNA_4,1          | -                               |
| GF0042413 | 0                             | 1                            | 0                            | 0 Hypothetical protein (1)                                                                   |                                                                                                                                                                                                                                                                                                                                                  |                                                                                                                                                                                                                                                                                                                                                                                                          | -                                | C_umh19_02191_mRNA_3,1          | -                               |
| GF0042412 | 0                             | 1                            | 0                            | 0 Hypothetical protein (1)                                                                   |                                                                                                                                                                                                                                                                                                                                                  |                                                                                                                                                                                                                                                                                                                                                                                                          | -                                | C_umh19_02188_mRNA_1,1          | -                               |
| GF0042411 | 0                             | 1                            | 0                            | 0 Hypothetical protein (1)                                                                   |                                                                                                                                                                                                                                                                                                                                                  |                                                                                                                                                                                                                                                                                                                                                                                                          | -                                | C_umh19_02187_mRNA_1,1          | -                               |
| GF0042410 | 0                             | 1                            | 0                            | 0 Hypothetical protein (1)                                                                   |                                                                                                                                                                                                                                                                                                                                                  |                                                                                                                                                                                                                                                                                                                                                                                                          | -                                | C_umh19_02186_mRNA_7,1          | -                               |
| GF0042409 | 0                             | 1                            | 0                            | 0 Hypothetical protein (1)                                                                   |                                                                                                                                                                                                                                                                                                                                                  |                                                                                                                                                                                                                                                                                                                                                                                                          | -                                | C_umh19_02186_mRNA_5,1          | -                               |
| GF0042408 | 0                             | 1                            | 0                            | 0 Hypothetical protein (1)                                                                   |                                                                                                                                                                                                                                                                                                                                                  |                                                                                                                                                                                                                                                                                                                                                                                                          | -                                | C_umh19_02186_mRNA_4,1          | -                               |
| GF0042407 | 0                             | 1                            | 0                            | 0 Hypothetical protein (1)                                                                   |                                                                                                                                                                                                                                                                                                                                                  |                                                                                                                                                                                                                                                                                                                                                                                                          | -                                | C_umh19_02186_mRNA_3,1          | -                               |
| GF0042406 | 0                             | 1                            | 0                            | 0 Hypothetical protein (1)                                                                   |                                                                                                                                                                                                                                                                                                                                                  |                                                                                                                                                                                                                                                                                                                                                                                                          | -                                | C_umh19_02186_mRNA_1,1          | -                               |
| GF0042405 | 0                             | 1                            | 0                            | 0 Hypothetical protein (1)                                                                   |                                                                                                                                                                                                                                                                                                                                                  |                                                                                                                                                                                                                                                                                                                                                                                                          | -                                | C_umh19_02185_mRNA_7,1          | -                               |
| GF0042404 | 0                             | 1                            | 0                            | 0 Hypothetical protein (1)                                                                   |                                                                                                                                                                                                                                                                                                                                                  |                                                                                                                                                                                                                                                                                                                                                                                                          | -                                | C_umh19_02185_mRNA_4,1          | -                               |
| GF0042403 | 0                             | 1                            | 0                            | 0 Hypothetical protein (1)                                                                   |                                                                                                                                                                                                                                                                                                                                                  |                                                                                                                                                                                                                                                                                                                                                                                                          | -                                | C_umh19_02185_mRNA_1,1          | -                               |
| GF0042402 | 0                             | 1                            | 0                            | 0 Hypothetical protein (1)                                                                   |                                                                                                                                                                                                                                                                                                                                                  |                                                                                                                                                                                                                                                                                                                                                                                                          | -                                | C_umh19_02183_mRNA_4,1          | -                               |
| GF0042401 | 0                             | 1                            | 0                            | 0 Hypothetical protein (1)                                                                   |                                                                                                                                                                                                                                                                                                                                                  |                                                                                                                                                                                                                                                                                                                                                                                                          | -                                | C_umh19_02183_mRNA_1,1          | -                               |
| GF0042400 | 0                             | 1                            | 0                            | 0 Hypothetical protein (1)                                                                   |                                                                                                                                                                                                                                                                                                                                                  |                                                                                                                                                                                                                                                                                                                                                                                                          | -                                | C_umh19_02180_mRNA_2,1          | -                               |
| GF0042399 | 0                             | 1                            | 0                            | 0 Hypothetical protein (1)                                                                   |                                                                                                                                                                                                                                                                                                                                                  |                                                                                                                                                                                                                                                                                                                                                                                                          | -                                | C_umh19_02179_mRNA_1,1          | -                               |
| GF0042398 | 0                             | 1                            | 0                            | 0 Hypothetical protein (1)                                                                   |                                                                                                                                                                                                                                                                                                                                                  |                                                                                                                                                                                                                                                                                                                                                                                                          | -                                | C_umh19_02178_mRNA_5,1          | -                               |
| GF0042397 | 0                             | 1                            | 0                            | 0 Hypothetical protein (1)                                                                   |                                                                                                                                                                                                                                                                                                                                                  |                                                                                                                                                                                                                                                                                                                                                                                                          | -                                | C_umh19_02178_mRNA_2,1          | -                               |
| GF0042396 | 0                             | 1                            | 0                            | 0 Hypothetical protein (1)                                                                   | GTP biosynthetic process [GO:0006183 biological_process] (1); CTP biosynthetic process [GO:0006241 biological_process] (1); UTP biosynthetic process [GO:0006228 biological_process] (1); nucleoside diphosphate phosphorylation [GO:0006165 biological_process] (1); nucleoside diphosphate kinase activity [GO:0004550 molecular_function] (1) | Nucleoside diphosphate kinase [IPR01564] (1)                                                                                                                                                                                                                                                                                                                                                             | -                                | C_umh19_02178_mRNA_1,1          | -                               |
| GF0042395 | 0                             | 1                            | 0                            | 0 Hypothetical protein (1)                                                                   |                                                                                                                                                                                                                                                                                                                                                  |                                                                                                                                                                                                                                                                                                                                                                                                          | -                                | C_umh19_02177_mRNA_4,1          | -                               |
| GF0042394 | 0                             | 1                            | 0                            | 0 Hypothetical protein (1)                                                                   |                                                                                                                                                                                                                                                                                                                                                  |                                                                                                                                                                                                                                                                                                                                                                                                          | -                                | C_umh19_02177_mRNA_3,1          | -                               |
| GF0042393 | 0                             | 1                            | 0                            | 0 Hypothetical protein (1)                                                                   |                                                                                                                                                                                                                                                                                                                                                  |                                                                                                                                                                                                                                                                                                                                                                                                          | -                                | C_umh19_02177_mRNA_2,1          | -                               |
| GF0042392 | 0                             | 1                            | 0                            | 0 Hypothetical protein (1)                                                                   |                                                                                                                                                                                                                                                                                                                                                  |                                                                                                                                                                                                                                                                                                                                                                                                          | -                                | C_umh19_02175_mRNA_4,1          | -                               |
| GF0042391 | 0                             | 1                            | 0                            | 0 Hypothetical protein (1)                                                                   | hydrolase activity, acting on ester bonds [GO:0016788 molecular_function] (1)                                                                                                                                                                                                                                                                    | Harburg transposase-derived protein [IPR009121] (1)                                                                                                                                                                                                                                                                                                                                                      | -                                | C_umh19_02175_mRNA_2,1          | -                               |
| GF0042390 | 0                             | 1                            | 0                            | 0 Hypothetical protein (1)                                                                   |                                                                                                                                                                                                                                                                                                                                                  |                                                                                                                                                                                                                                                                                                                                                                                                          | -                                | C_umh19_02174_mRNA_1,1          | -                               |
| GF0042389 | 0                             | 1                            | 0                            | 0 Hypothetical protein (1)                                                                   |                                                                                                                                                                                                                                                                                                                                                  |                                                                                                                                                                                                                                                                                                                                                                                                          | -                                | C_umh19_02170_mRNA_6,1          | -                               |
| GF0042388 | 0                             | 1                            | 0                            | 0 Hypothetical protein (1)                                                                   | O-methyltransferase activity [GO:0008171 molecular_function] (1); methyltransferase activity [GO:0008168 molecular_function] (1)                                                                                                                                                                                                                 | S-adenosyl-4-methionine-dependent methyltransferase [IPR029063] (1); O-methyltransferase CDMAT-type [IPR016461] (1); O-methyltransferase, family 2 [IPR001077] (1)                                                                                                                                                                                                                                       | -                                | C_umh19_02170_mRNA_2,1          | -                               |
| GF0042387 | 0                             | 1                            | 0                            | 0 Hypothetical protein (1)                                                                   |                                                                                                                                                                                                                                                                                                                                                  |                                                                                                                                                                                                                                                                                                                                                                                                          | -                                | C_umh19_02169_mRNA_4,1          | -                               |
| GF0042386 | 0                             | 1                            | 0                            | 0 Hypothetical protein (1)                                                                   |                                                                                                                                                                                                                                                                                                                                                  |                                                                                                                                                                                                                                                                                                                                                                                                          | -                                | C_umh19_02169_mRNA_3,1          | -                               |
| GF0042385 | 0                             | 1                            | 0                            | 0 Hypothetical protein (1)                                                                   |                                                                                                                                                                                                                                                                                                                                                  |                                                                                                                                                                                                                                                                                                                                                                                                          | -                                | C_umh19_02169_mRNA_1,1          | -                               |
| GF0042384 | 0                             | 1                            | 0                            | 0 Hypothetical protein (1)                                                                   |                                                                                                                                                                                                                                                                                                                                                  |                                                                                                                                                                                                                                                                                                                                                                                                          | -                                | C_umh19_02168_mRNA_8,1          | -                               |
| GF0042383 | 0                             | 1                            | 0                            | 0 Hypothetical protein (1)                                                                   |                                                                                                                                                                                                                                                                                                                                                  |                                                                                                                                                                                                                                                                                                                                                                                                          | -                                | C_umh19_02168_mRNA_7,1          | -                               |
| GF0042382 | 0                             | 1                            | 0                            | 0 Hypothetical protein (1)                                                                   |                                                                                                                                                                                                                                                                                                                                                  |                                                                                                                                                                                                                                                                                                                                                                                                          | -                                | C_umh19_02168_mRNA_3,1          | -                               |
| GF0042381 | 0                             | 1                            | 0                            | 0 Serine/threonine-protein kinase Neck4, related (1)                                         | ATP binding [GO:0005524 molecular_function] (1); protein phosphorylation [GO:0006468 biological_process] (1); protein kinase activity [GO:0004672 molecular_function] (1)                                                                                                                                                                        | Protein kinase, ATP binding site [IPR017411] (1); Protein kinase-like domain [IPR011009] (1); Protein kinase domain [IPR000719] (1)                                                                                                                                                                                                                                                                      | -                                | C_umh19_02167_mRNA_6,1          | -                               |
| GF0042380 | 0                             | 1                            | 0                            | 0 Hypothetical protein (1)                                                                   |                                                                                                                                                                                                                                                                                                                                                  |                                                                                                                                                                                                                                                                                                                                                                                                          | -                                | C_umh19_02167_mRNA_4,1          | -                               |
| GF0042379 | 0                             | 1                            | 0                            | 0 Hypothetical protein (1)                                                                   |                                                                                                                                                                                                                                                                                                                                                  |                                                                                                                                                                                                                                                                                                                                                                                                          | -                                | C_umh19_02167_mRNA_2,1          | -                               |
| GF0042378 | 0                             | 1                            | 0                            | 0 Hypothetical protein (1)                                                                   |                                                                                                                                                                                                                                                                                                                                                  |                                                                                                                                                                                                                                                                                                                                                                                                          | -                                | C_umh19_02165_mRNA_3,1          | -                               |
| GF0042377 | 0                             | 1                            | 0                            | 0 Hypothetical protein (1)                                                                   |                                                                                                                                                                                                                                                                                                                                                  |                                                                                                                                                                                                                                                                                                                                                                                                          | -                                | C_umh19_02165_mRNA_2,1          | -                               |
| GF0042376 | 0                             | 1                            | 0                            | 0 Hypothetical protein (1)                                                                   |                                                                                                                                                                                                                                                                                                                                                  |                                                                                                                                                                                                                                                                                                                                                                                                          | -                                | C_umh19_02165_mRNA_1,1          | -                               |
| GF0042375 | 0                             | 1                            | 0                            | 0 Hypothetical protein (1)                                                                   |                                                                                                                                                                                                                                                                                                                                                  |                                                                                                                                                                                                                                                                                                                                                                                                          | -                                | C_umh19_02163_mRNA_3,1          | -                               |
| GF0042374 | 0                             | 1                            | 0                            | 0 Hypothetical protein (1)                                                                   |                                                                                                                                                                                                                                                                                                                                                  |                                                                                                                                                                                                                                                                                                                                                                                                          | -                                | C_umh19_02163_mRNA_2,1          | -                               |
| GF0042373 | 0                             | 1                            | 0                            | 0 Hypothetical protein (1)                                                                   |                                                                                                                                                                                                                                                                                                                                                  |                                                                                                                                                                                                                                                                                                                                                                                                          | -                                | C_umh19_02163_mRNA_1,1          | -                               |
| GF0042372 | 0                             | 1                            | 0                            | 0 Hypothetical protein (1)                                                                   | terpene synthase activity [GO:0010333 molecular_function] (1); lyase activity [GO:0016829 molecular_function] (1); magnesium ion binding [GO:0000287 molecular_function] (1)                                                                                                                                                                     | Isoprenoid synthase domain [IPR008949] (1); Terpene synthase, metal-binding domain [IPR006300] (1)                                                                                                                                                                                                                                                                                                       | -                                | C_umh19_02162_mRNA_3,1          | -                               |
| GF0042371 | 0                             | 1                            | 0                            | 0 Putative disease resistance gene NBS-LRR family protein (1)                                | ADP binding [GO:0042531 molecular_function] (1)                                                                                                                                                                                                                                                                                                  | Leucine-rich repeat domain, L domain-like [IPR029275] (1); NB-ARC [IPR002182] (1); P-loop containing nucleoside triphosphate hydrolase [IPR027417] (1)                                                                                                                                                                                                                                                   | -                                | C_umh19_02160_mRNA_5,1          | -                               |
| GF0042370 | 0                             | 1                            | 0                            | 0 Hypothetical protein (1)                                                                   |                                                                                                                                                                                                                                                                                                                                                  |                                                                                                                                                                                                                                                                                                                                                                                                          | -                                | C_umh19_02159_mRNA_3,1          | -                               |
| GF0042369 | 0                             | 1                            | 0                            | 0 Hypothetical protein (1)                                                                   |                                                                                                                                                                                                                                                                                                                                                  |                                                                                                                                                                                                                                                                                                                                                                                                          | -                                | C_umh19_02159_mRNA_2,1          | -                               |
| GF0042368 | 0                             | 1                            | 0                            | 0 Hypothetical protein (1)                                                                   | recognition of pollen [GO:0048544 biological_process] (1)                                                                                                                                                                                                                                                                                        | Leucine-rich repeat domain, L domain-like [IPR029275] (1)                                                                                                                                                                                                                                                                                                                                                | -                                | C_umh19_02158_mRNA_4,1          | -                               |
| GF0042367 | 0                             | 1                            | 0                            | 0 Hypothetical protein (1)                                                                   |                                                                                                                                                                                                                                                                                                                                                  |                                                                                                                                                                                                                                                                                                                                                                                                          | -                                | C_umh19_02158_mRNA_3,1          | -                               |
| GF0042366 | 0                             | 1                            | 0                            | 0 Hypothetical protein (1)                                                                   | recognition of pollen [GO:0048544 biological_process] (1)                                                                                                                                                                                                                                                                                        | PAN-Apple domain [IPR003699] (1); Bulb-type lectin domain [IPR001480] (1); S-locus glycoprotein domain [IPR000888] (1)                                                                                                                                                                                                                                                                                   | -                                | C_umh19_02158_mRNA_2,1          | -                               |
| GF0042365 | 0                             | 1                            | 0                            | 0 Hypothetical protein (1)                                                                   |                                                                                                                                                                                                                                                                                                                                                  |                                                                                                                                                                                                                                                                                                                                                                                                          | -                                | C_umh19_02157_mRNA_4,1          | -                               |
| GF0042364 | 0                             | 1                            | 0                            | 0 Exo-polygalacturonase, family GH28 (1)                                                     | carbohydrate metabolic process [GO:0005975 biological_process] (1); polygalacturonase activity [GO:0004050 molecular_function] (1)                                                                                                                                                                                                               | Pectin lyase fold/virulence factor [IPR011050] (1); Pectin lyase fold [IPR012348] (1); Parallel beta-sheet repeat [IPR000620] (1); Glycoside hydrolase, family 28 [IPR007043] (1)                                                                                                                                                                                                                        | -                                | C_umh19_02157_mRNA_2,1          | -                               |
| GF0042363 | 0                             | 1                            | 0                            | 0 Hypothetical protein (1)                                                                   |                                                                                                                                                                                                                                                                                                                                                  |                                                                                                                                                                                                                                                                                                                                                                                                          | -                                | C_umh19_02157_mRNA_1,1          | -                               |
| GF0042362 | 0                             | 1                            | 0                            | 0 Hypothetical protein (1)                                                                   |                                                                                                                                                                                                                                                                                                                                                  |                                                                                                                                                                                                                                                                                                                                                                                                          | -                                | C_umh19_02156_mRNA_1,1          | -                               |
| GF0042361 | 0                             | 1                            | 0                            | 0 Hypothetical protein (1)                                                                   |                                                                                                                                                                                                                                                                                                                                                  |                                                                                                                                                                                                                                                                                                                                                                                                          | -                                | C_umh19_02155_mRNA_4,1          | -                               |
| GF0042360 | 0                             | 1                            | 0                            | 0 Hypothetical protein (1)                                                                   |                                                                                                                                                                                                                                                                                                                                                  |                                                                                                                                                                                                                                                                                                                                                                                                          | -                                | C_umh19_02155_mRNA_1,1          | -                               |
| GF0042359 | 0                             | 1                            | 0                            | 0 Disease resistance family protein / LRR family protein, putative (1)                       | protein binding [GO:0005515 molecular_function] (1)                                                                                                                                                                                                                                                                                              | Leucine-rich repeat [IPR016111] (1); Leucine-rich repeat domain, L domain-like [IPR029275] (1)                                                                                                                                                                                                                                                                                                           | -                                | C_umh19_02153_mRNA_2,1          | -                               |
| GF0042358 | 0                             | 1                            | 0                            | 0 Disease resistance family protein / LRR family protein (1)                                 | protein binding [GO:0005515 molecular_function] (1)                                                                                                                                                                                                                                                                                              | Leucine-rich repeat-containing N-terminal, plant-type [IPR013210] (1); Leucine-rich repeat [IPR016111] (1); Leucine-rich repeat domain, L domain-like [IPR029275] (1); Leucine-rich repeat, typical subtype [IPR018391] (1)                                                                                                                                                                              | -                                | C_umh19_02153_mRNA_1,1          | -                               |
| GF0042357 | 0                             | 1                            | 0                            | 0 Hypothetical protein (1)                                                                   |                                                                                                                                                                                                                                                                                                                                                  |                                                                                                                                                                                                                                                                                                                                                                                                          | -                                | C_umh19_02152_mRNA_1,1          | -                               |
| GF0042356 | 0                             | 1                            | 0                            | 0 Hypothetical protein (1)                                                                   | oxidoreductase activity, acting on paired donors, with incorporation or reduction of molecular oxygen [GO:0006180 molecular_function] (1); oxidation-reduction process [GO:0005514 biological_process] (1); heme binding [GO:0020037 molecular_function] (1); iron ion binding [GO:0005506 molecular_function] (1)                               | Cytochrome P450 [IPR001128] (1)                                                                                                                                                                                                                                                                                                                                                                          | -                                | C_umh19_02151_mRNA_3,1          | -                               |
| GF0042355 | 0                             | 1                            | 0                            | 0 Hypothetical protein (1)                                                                   | zinc ion binding [GO:0008270 molecular_function] (1)                                                                                                                                                                                                                                                                                             | Zinc finger, SWIM-type [IPR007527] (1); Transposase, MuDR, plant [IPR004332] (1); Zinc finger, DMZ-type [IPR006564] (1); MULE transposase domain [IPR018289] (1)                                                                                                                                                                                                                                         | -                                | C_umh19_02151_mRNA_2,1          | -                               |
| GF0042354 | 0                             | 1                            | 0                            | 0 Hypothetical protein (1)                                                                   |                                                                                                                                                                                                                                                                                                                                                  |                                                                                                                                                                                                                                                                                                                                                                                                          | -                                | C_umh19_02151_mRNA_1,1          | -                               |
| GF0042353 | 0                             | 1                            | 0                            | 0 60S ribosomal protein L36 (1)                                                              | ribosome [GO:0005840 cellular_component] (1); structural constituent of ribosome [GO:0005315 molecular_function] (1); translation [GO:0006412 biological_process] (1); structural [GO:0009622 cellular_component] (1)                                                                                                                            | Ribosomal protein L36 [IPR000509] (1)                                                                                                                                                                                                                                                                                                                                                                    | -                                | C_umh19_02150_mRNA_2,1          | -                               |
| GF0042352 | 0                             | 1                            | 0                            | 0 Hypothetical protein (1)                                                                   | protein binding [GO:0005515 molecular_function] (1)                                                                                                                                                                                                                                                                                              | Arkyrin repeat-containing domain [IPR000813] (1); Arkyrin repeat [IPR002110] (1)                                                                                                                                                                                                                                                                                                                         | -                                | C_umh19_02149_mRNA_4,1          | -                               |
| GF0042351 | 0                             | 1                            | 0                            | 0 BURP domain-containing protein (1)                                                         |                                                                                                                                                                                                                                                                                                                                                  | BURP domain [IPR004873] (1)                                                                                                                                                                                                                                                                                                                                                                              | -                                | C_umh19_02149_mRNA_2,1          | -                               |
| GF0042350 | 0                             | 1                            | 0                            | 0 Hypothetical protein (1)                                                                   |                                                                                                                                                                                                                                                                                                                                                  |                                                                                                                                                                                                                                                                                                                                                                                                          | -                                | C_umh19_02148_mRNA_3,1          | -                               |
| GF0042349 | 0                             | 1                            | 0                            | 0 Cytokinin riboside 5'-monophosphate phosphoribidylase (1)                                  |                                                                                                                                                                                                                                                                                                                                                  | LOG family [IPR031100] (1)                                                                                                                                                                                                                                                                                                                                                                               | -                                | C_umh19_02147_mRNA_2,1          | -                               |
| GF0042348 | 0                             | 1                            | 0                            | 0 Hypothetical protein (1)                                                                   |                                                                                                                                                                                                                                                                                                                                                  |                                                                                                                                                                                                                                                                                                                                                                                                          | -                                | C_umh19_02147_mRNA_1,1          | -                               |

| ID       | Num. in C. crottenstei | Num. in C. auris | Num. in P. putida | Note                                                              | GO                                                                                                                                                                                                                                                                                                                                                                 | InterPro                                                                                                                                                                                                             | Members in C. crottenstei                                                                             | Members in C. auris     | Members in P. putida |
|----------|------------------------|------------------|-------------------|-------------------------------------------------------------------|--------------------------------------------------------------------------------------------------------------------------------------------------------------------------------------------------------------------------------------------------------------------------------------------------------------------------------------------------------------------|----------------------------------------------------------------------------------------------------------------------------------------------------------------------------------------------------------------------|-------------------------------------------------------------------------------------------------------|-------------------------|----------------------|
| GF004237 | 0                      | 1                | 1                 | 4-hydroxy-3-methylbut-2-enyl diphosphate reductase (1)            | 4-hydroxy-3-methylbut-2-enyl diphosphate reductase activity [GO:0015745 molecular_function] (1); isopentenyl diphosphate biosynthetic process, methylerythritol 4-phosphate pathway [GO:0019288 biological_process] (1); metal ion binding [GO:0046872 molecular_function] (1); dimethylallyl diphosphate biosynthetic process [GO:0065992 biological_process] (1) | 4-hydroxy-3-methylbut-2-enyl diphosphate reductase [IPRO03451] (1)                                                                                                                                                   | C_umbii_02145_mRNA_3.1                                                                                | -                       |                      |
| GF004236 | 0                      | 1                | 0                 | Hypothetical protein (1)                                          | -                                                                                                                                                                                                                                                                                                                                                                  | -                                                                                                                                                                                                                    | -                                                                                                     | C_umbii_02143_mRNA_2.1  | -                    |
| GF004235 | 0                      | 1                | 0                 | Hypothetical protein (1)                                          | -                                                                                                                                                                                                                                                                                                                                                                  | -                                                                                                                                                                                                                    | -                                                                                                     | C_umbii_02142_mRNA_2.1  | -                    |
| GF004234 | 0                      | 1                | 0                 | Hypothetical protein (1)                                          | -                                                                                                                                                                                                                                                                                                                                                                  | -                                                                                                                                                                                                                    | -                                                                                                     | C_umbii_02142_mRNA_1.1  | -                    |
| GF004233 | 0                      | 1                | 1                 | 0 PsaA protein (1)                                                | photosynthetic electron transport in photosystem II [GO:0009772 biological_process] (1); electron transport, transferring electrons within the cyclic electron transport pathway of photosynthesis activity [GO:0045156 molecular_function] (1); photosynthesis, light reaction [GO:0019684 biological_process] (1)                                                | Photosynthetic reaction centre, LAM [IPRO00484] (1)                                                                                                                                                                  | C_umbii_02140_mRNA_1.1                                                                                | -                       |                      |
| GF004232 | 0                      | 1                | 0                 | Hypothetical protein (1)                                          | -                                                                                                                                                                                                                                                                                                                                                                  | -                                                                                                                                                                                                                    | -                                                                                                     | C_umbii_02139_mRNA_3.1  | -                    |
| GF004231 | 0                      | 1                | 0                 | Hypothetical protein (1)                                          | -                                                                                                                                                                                                                                                                                                                                                                  | -                                                                                                                                                                                                                    | -                                                                                                     | C_umbii_02138_mRNA_3.1  | -                    |
| GF004230 | 0                      | 1                | 0                 | Hypothetical protein (1)                                          | -                                                                                                                                                                                                                                                                                                                                                                  | -                                                                                                                                                                                                                    | -                                                                                                     | C_umbii_02138_mRNA_1.1  | -                    |
| GF004229 | 0                      | 1                | 0                 | Hypothetical protein (1)                                          | -                                                                                                                                                                                                                                                                                                                                                                  | Protein of unknown function DUF866, eukaryotic [IPRO08884] (1)                                                                                                                                                       | -                                                                                                     | C_umbii_02137_mRNA_2.1  | -                    |
| GF004228 | 0                      | 1                | 0                 | Hypothetical protein (1)                                          | -                                                                                                                                                                                                                                                                                                                                                                  | -                                                                                                                                                                                                                    | -                                                                                                     | C_umbii_02136_mRNA_2.1  | -                    |
| GF004227 | 0                      | 1                | 0                 | Hypothetical protein (1)                                          | -                                                                                                                                                                                                                                                                                                                                                                  | -                                                                                                                                                                                                                    | -                                                                                                     | C_umbii_02136_mRNA_1.1  | -                    |
| GF004226 | 0                      | 1                | 0                 | Hypothetical protein (1)                                          | -                                                                                                                                                                                                                                                                                                                                                                  | -                                                                                                                                                                                                                    | -                                                                                                     | C_umbii_02134_mRNA_2.1  | -                    |
| GF004225 | 0                      | 1                | 0                 | Hypothetical protein (1)                                          | -                                                                                                                                                                                                                                                                                                                                                                  | -                                                                                                                                                                                                                    | -                                                                                                     | C_umbii_02131_mRNA_7.1  | -                    |
| GF004224 | 0                      | 1                | 0                 | Hypothetical protein (1)                                          | -                                                                                                                                                                                                                                                                                                                                                                  | -                                                                                                                                                                                                                    | -                                                                                                     | C_umbii_02131_mRNA_6.1  | -                    |
| GF004223 | 0                      | 1                | 0                 | Hypothetical protein (1)                                          | -                                                                                                                                                                                                                                                                                                                                                                  | -                                                                                                                                                                                                                    | -                                                                                                     | C_umbii_02131_mRNA_3.1  | -                    |
| GF004222 | 0                      | 1                | 0                 | Hypothetical protein (1)                                          | -                                                                                                                                                                                                                                                                                                                                                                  | -                                                                                                                                                                                                                    | -                                                                                                     | C_umbii_02131_mRNA_2.1  | -                    |
| GF004221 | 0                      | 1                | 0                 | Hypothetical protein (1)                                          | -                                                                                                                                                                                                                                                                                                                                                                  | -                                                                                                                                                                                                                    | -                                                                                                     | C_umbii_02131_mRNA_1.1  | -                    |
| GF004220 | 0                      | 1                | 0                 | Hypothetical protein (1)                                          | -                                                                                                                                                                                                                                                                                                                                                                  | -                                                                                                                                                                                                                    | -                                                                                                     | C_umbii_02130_mRNA_6.1  | -                    |
| GF004219 | 0                      | 1                | 0                 | Hypothetical protein (1)                                          | -                                                                                                                                                                                                                                                                                                                                                                  | -                                                                                                                                                                                                                    | -                                                                                                     | C_umbii_02130_mRNA_5.1  | -                    |
| GF004218 | 0                      | 1                | 0                 | Hypothetical protein (1)                                          | putative non-LTR retrotransposon reverse transcriptase (1)                                                                                                                                                                                                                                                                                                         | nucleic acid binding [GO:0003676 molecular_function] (1)                                                                                                                                                             | Ribonuclease H-like domain [IPRO12337] (1); Reverse transcriptase zinc-binding domain [IPRO20960] (1) | C_umbii_02130_mRNA_4.1  | -                    |
| GF004217 | 0                      | 1                | 0                 | Hypothetical protein (1)                                          | -                                                                                                                                                                                                                                                                                                                                                                  | -                                                                                                                                                                                                                    | -                                                                                                     | C_umbii_02130_mRNA_2.1  | -                    |
| GF004216 | 0                      | 1                | 0                 | Hypothetical protein (1)                                          | -                                                                                                                                                                                                                                                                                                                                                                  | -                                                                                                                                                                                                                    | -                                                                                                     | C_umbii_02129_mRNA_4.1  | -                    |
| GF004215 | 0                      | 1                | 0                 | Hypothetical protein (1)                                          | -                                                                                                                                                                                                                                                                                                                                                                  | -                                                                                                                                                                                                                    | -                                                                                                     | C_umbii_02126_mRNA_3.1  | -                    |
| GF004214 | 0                      | 1                | 0                 | Disease resistance protein (CC-NBS-LRR class) family protein (1)  | Disease resistance protein (CC-NBS-LRR class) family protein [GO:0043531 molecular_function] (1)                                                                                                                                                                                                                                                                   | Leucine-rich repeat domain, L domain-like [IPRO2575] (1); P-loop containing nucleoside triphosphate hydrolase [IPRO21417] (1); NB-ARC [IPRO02182] (1); A-A-T ATPase domain [IPRO03593] (1)                           | C_umbii_02125_mRNA_3.1                                                                                | -                       |                      |
| GF004213 | 0                      | 1                | 0                 | Hypothetical protein (1)                                          | -                                                                                                                                                                                                                                                                                                                                                                  | -                                                                                                                                                                                                                    | -                                                                                                     | C_umbii_02124_mRNA_6.1  | -                    |
| GF004212 | 0                      | 1                | 0                 | Hypothetical protein (1)                                          | nucleic acid binding [GO:0003676 molecular_function] (1); DNA integration [GO:0015074 biological_process] (1)                                                                                                                                                                                                                                                      | Integrase, catalytic core [IPRO1584] (1); Ribonuclease H-like domain [IPRO12337] (1)                                                                                                                                 | C_umbii_02124_mRNA_4.1                                                                                | -                       |                      |
| GF004211 | 0                      | 1                | 0                 | Hypothetical protein (1)                                          | -                                                                                                                                                                                                                                                                                                                                                                  | -                                                                                                                                                                                                                    | -                                                                                                     | C_umbii_02123_mRNA_5.1  | -                    |
| GF004210 | 0                      | 1                | 0                 | Hypothetical protein (1)                                          | -                                                                                                                                                                                                                                                                                                                                                                  | -                                                                                                                                                                                                                    | -                                                                                                     | C_umbii_02123_mRNA_4.1  | -                    |
| GF004209 | 0                      | 1                | 0                 | Hypothetical protein (1)                                          | metal ion binding [GO:0046872 molecular_function] (1); integral component of membrane [GO:0016021 cellular_component] (1); nucleotide binding [GO:0000166 molecular_function] (1)                                                                                                                                                                                  | P-type ATPase, A domain [IPRO08250] (1); P-type ATPase, transmembrane domain [IPRO22390] (1); P-type ATPase [IPRO01757] (1); P-type ATPase phosphorylation site [IPRO18303] (1)                                      | C_umbii_02123_mRNA_3.1                                                                                | -                       |                      |
| GF004208 | 0                      | 1                | 0                 | Hypothetical protein (1)                                          | -                                                                                                                                                                                                                                                                                                                                                                  | -                                                                                                                                                                                                                    | -                                                                                                     | C_umbii_02123_mRNA_2.1  | -                    |
| GF004207 | 0                      | 1                | 0                 | Hypothetical protein (1)                                          | -                                                                                                                                                                                                                                                                                                                                                                  | -                                                                                                                                                                                                                    | -                                                                                                     | C_umbii_02121_mRNA_7.1  | -                    |
| GF004206 | 0                      | 1                | 0                 | Hypothetical protein (1)                                          | -                                                                                                                                                                                                                                                                                                                                                                  | -                                                                                                                                                                                                                    | -                                                                                                     | C_umbii_02121_mRNA_6.1  | -                    |
| GF004205 | 0                      | 1                | 0                 | Hypothetical protein (1)                                          | O-methyltransferase activity [GO:0008171 molecular_function] (1); methyltransferase activity [GO:0008168 molecular_function] (1)                                                                                                                                                                                                                                   | O-methyltransferase, family 2 [IPRO1077] (1); O-methyltransferase CMT-1-type [IPRO1646] (1); S-adenosyl-L-methionine-dependent methyltransferase [IPRO29063] (1)                                                     | C_umbii_02120_mRNA_3.1                                                                                | -                       |                      |
| GF004204 | 0                      | 1                | 0                 | Dolichyl-diphosphooligosaccharide-protein glycosyltransferase (1) | integral component of membrane [GO:0016021 cellular_component] (1); protein N-linked glycosylation [GO:0006877 biological_process] (1); oligosaccharyltransferase complex [GO:0008250 cellular_component] (1)                                                                                                                                                      | Dolichyl-diphosphooligosaccharide-protein glycosyltransferase subunit Swp1 [IPRO08814] (1)                                                                                                                           | C_umbii_02120_mRNA_2.1                                                                                | -                       |                      |
| GF004203 | 0                      | 1                | 0                 | Hypothetical protein (1)                                          | oxidation-reduction process [GO:0055114 biological_process] (1); oxidoreductase activity [GO:0001649 molecular_function] (1); zinc ion binding [GO:0008270 molecular_function] (1)                                                                                                                                                                                 | NAD(P)-binding domain [IPRO1640] (1); Alcohol dehydrogenase superfamily, zinc-type [IPRO2085] (1); GroES-like [IPRO11022] (1)                                                                                        | C_umbii_02119_mRNA_4.1                                                                                | -                       |                      |
| GF004202 | 0                      | 1                | 0                 | Hypothetical protein (1)                                          | cation transport [GO:0006812 biological_process] (1); integral component of membrane [GO:0016021 cellular_component] (1)                                                                                                                                                                                                                                           | Cation H <sup>+</sup> exchanger, CPA1 family [IPRO18422] (1)                                                                                                                                                         | C_umbii_02119_mRNA_3.1                                                                                | -                       |                      |
| GF004201 | 0                      | 1                | 0                 | Hypothetical protein (1)                                          | zinc ion binding [GO:0008270 molecular_function] (1); oxidation-reduction process [GO:0055114 biological_process] (1); oxidoreductase activity [GO:0001649 molecular_function] (1)                                                                                                                                                                                 | Alcohol dehydrogenase superfamily, zinc-type [IPRO2085] (1); GroES-like [IPRO11022] (1)                                                                                                                              | C_umbii_02119_mRNA_1.1                                                                                | -                       |                      |
| GF004200 | 0                      | 1                | 0                 | Delta-cadinene synthase isozyme XC14 (1)                          | terpene synthase activity [GO:0010333 molecular_function] (1); lyase activity [GO:0016829 molecular_function] (1); metabolic process [GO:0008152 biological_process] (1)                                                                                                                                                                                           | Terpenoid cyclase protein prenyltransferase alpha-alpha tosylid [IPRO08930] (1); Terpene synthase, N-terminal domain [IPRO01906] (1)                                                                                 | C_umbii_02118_mRNA_4.1                                                                                | -                       |                      |
| GF004199 | 0                      | 1                | 0                 | Hypothetical protein (1)                                          | -                                                                                                                                                                                                                                                                                                                                                                  | -                                                                                                                                                                                                                    | -                                                                                                     | C_umbii_02117_mRNA_5.1  | -                    |
| GF004198 | 0                      | 1                | 0                 | Hypothetical protein (1)                                          | -                                                                                                                                                                                                                                                                                                                                                                  | -                                                                                                                                                                                                                    | -                                                                                                     | C_umbii_02117_mRNA_1.1  | -                    |
| GF004197 | 0                      | 1                | 0                 | Hypothetical protein (1)                                          | zinc ion binding [GO:0008270 molecular_function] (1)                                                                                                                                                                                                                                                                                                               | Endonuclease/exonuclease/phosphatase [IPRO0135] (1); Zinc finger, SWIM-type [IPRO7527] (1); MULE transposase domain [IPRO02809] (1); Zinc finger, PHZ-type [IPRO0606] (1); Transposase, Mu/D, plant [IPRO4332] (1)   | C_umbii_02116_mRNA_3.1                                                                                | -                       |                      |
| GF004196 | 0                      | 1                | 0                 | Hypothetical protein (1)                                          | -                                                                                                                                                                                                                                                                                                                                                                  | -                                                                                                                                                                                                                    | -                                                                                                     | C_umbii_02115_mRNA_4.1  | -                    |
| GF004195 | 0                      | 1                | 0                 | Hypothetical protein (1)                                          | -                                                                                                                                                                                                                                                                                                                                                                  | -                                                                                                                                                                                                                    | -                                                                                                     | C_umbii_02115_mRNA_3.1  | -                    |
| GF004194 | 0                      | 1                | 0                 | Disease resistance protein RGA2 (1)                               | Disease resistance protein (CC-NBS-LRR class) family protein [GO:0043531 molecular_function] (1)                                                                                                                                                                                                                                                                   | Endonuclease/exonuclease/phosphatase [IPRO0135] (1); Domain of unknown function DUF4283 [IPRO25558] (1)                                                                                                              | C_umbii_02115_mRNA_1.1                                                                                | -                       |                      |
| GF004193 | 0                      | 1                | 0                 | Hypothetical protein (1)                                          | -                                                                                                                                                                                                                                                                                                                                                                  | Protein RET1, ULATA-related [IPRO21825] (1)                                                                                                                                                                          | -                                                                                                     | C_umbii_02114_mRNA_2.1  | -                    |
| GF004192 | 0                      | 1                | 0                 | Hypothetical protein (1)                                          | -                                                                                                                                                                                                                                                                                                                                                                  | -                                                                                                                                                                                                                    | -                                                                                                     | C_umbii_02114_mRNA_1.1  | -                    |
| GF004191 | 0                      | 1                | 0                 | Hypothetical protein (1)                                          | -                                                                                                                                                                                                                                                                                                                                                                  | -                                                                                                                                                                                                                    | -                                                                                                     | C_umbii_02108_mRNA_3.1  | -                    |
| GF004190 | 0                      | 1                | 0                 | Hypothetical protein (1)                                          | -                                                                                                                                                                                                                                                                                                                                                                  | -                                                                                                                                                                                                                    | -                                                                                                     | C_umbii_02105_mRNA_6.1  | -                    |
| GF004189 | 0                      | 1                | 0                 | Hypothetical protein (1)                                          | -                                                                                                                                                                                                                                                                                                                                                                  | -                                                                                                                                                                                                                    | -                                                                                                     | C_umbii_02104_mRNA_2.1  | -                    |
| GF004188 | 0                      | 1                | 0                 | Hypothetical protein (1)                                          | -                                                                                                                                                                                                                                                                                                                                                                  | -                                                                                                                                                                                                                    | -                                                                                                     | C_umbii_02104_mRNA_1.1  | -                    |
| GF004187 | 0                      | 1                | 0                 | Hypothetical protein (1)                                          | -                                                                                                                                                                                                                                                                                                                                                                  | -                                                                                                                                                                                                                    | -                                                                                                     | C_umbii_02103_mRNA_2.1  | -                    |
| GF004186 | 0                      | 1                | 0                 | Hypothetical protein (1)                                          | -                                                                                                                                                                                                                                                                                                                                                                  | -                                                                                                                                                                                                                    | -                                                                                                     | C_umbii_02103_mRNA_1.1  | -                    |
| GF004185 | 0                      | 1                | 0                 | Hypothetical protein (1)                                          | -                                                                                                                                                                                                                                                                                                                                                                  | -                                                                                                                                                                                                                    | -                                                                                                     | C_umbii_02102_mRNA_6.1  | -                    |
| GF004184 | 0                      | 1                | 0                 | Hypothetical protein (1)                                          | -                                                                                                                                                                                                                                                                                                                                                                  | -                                                                                                                                                                                                                    | -                                                                                                     | C_umbii_02102_mRNA_2.1  | -                    |
| GF004183 | 0                      | 1                | 0                 | Hypothetical protein (1)                                          | -                                                                                                                                                                                                                                                                                                                                                                  | -                                                                                                                                                                                                                    | -                                                                                                     | C_umbii_02102_mRNA_1.1  | -                    |
| GF004182 | 0                      | 1                | 0                 | Rapid alkalization factor (1)                                     | Rapid alkalization factor (1)                                                                                                                                                                                                                                                                                                                                      | Rapid Alkalization Factor [IPRO08801] (1)                                                                                                                                                                            | -                                                                                                     | C_umbii_02101_mRNA_5.1  | -                    |
| GF004181 | 0                      | 1                | 0                 | Aukysin repeat family protein, putative (1)                       | protein binding [GO:0005515 molecular_function] (1)                                                                                                                                                                                                                                                                                                                | PGG domain [IPRO2096] (1); Aukysin repeat-containing domain [IPRO20683] (1); Aukysin repeat [IPRO02110] (1)                                                                                                          | -                                                                                                     | C_umbii_02100_mRNA_7.1  | -                    |
| GF004180 | 0                      | 1                | 0                 | Aukysin repeat family protein, putative (1)                       | protein binding [GO:0005515 molecular_function] (1)                                                                                                                                                                                                                                                                                                                | Aukysin repeat-containing domain [IPRO20683] (1); Aukysin repeat [IPRO02110] (1)                                                                                                                                     | -                                                                                                     | C_umbii_02100_mRNA_5.1  | -                    |
| GF004179 | 0                      | 1                | 0                 | Hypothetical protein (1)                                          | -                                                                                                                                                                                                                                                                                                                                                                  | -                                                                                                                                                                                                                    | -                                                                                                     | C_umbii_02100_mRNA_4.1  | -                    |
| GF004178 | 0                      | 1                | 0                 | Hypothetical protein (1)                                          | -                                                                                                                                                                                                                                                                                                                                                                  | -                                                                                                                                                                                                                    | -                                                                                                     | C_umbii_02099_mRNA_6.1  | -                    |
| GF004177 | 0                      | 1                | 0                 | Hypothetical protein (1)                                          | -                                                                                                                                                                                                                                                                                                                                                                  | -                                                                                                                                                                                                                    | -                                                                                                     | C_umbii_02099_mRNA_4.1  | -                    |
| GF004176 | 0                      | 1                | 0                 | Hypothetical protein (1)                                          | transferase activity, transferring acyl groups [GO:0016746 molecular_function] (1); metabolic process [GO:0008152 biological_process] (1)                                                                                                                                                                                                                          | Chloramphenicol acetyltransferase-like domain [IPRO2131] (1); Ricin lipid attachment [IPRO00089] (1); Single hybrid motif [IPRO11053] (1); 2-oxoacid dehydrogenase acyltransferase, catalytic domain [IPRO01078] (1) | C_umbii_02099_mRNA_3.1                                                                                | -                       |                      |
| GF004175 | 0                      | 1                | 0                 | Hypothetical protein (1)                                          | -                                                                                                                                                                                                                                                                                                                                                                  | -                                                                                                                                                                                                                    | -                                                                                                     | C_umbii_02098_mRNA_3.1  | -                    |
| GF004174 | 0                      | 1                | 0                 | Hypothetical protein (1)                                          | -                                                                                                                                                                                                                                                                                                                                                                  | -                                                                                                                                                                                                                    | -                                                                                                     | C_umbii_02097_mRNA_8.1  | -                    |
| GF004173 | 0                      | 1                | 0                 | Hypothetical protein (1)                                          | -                                                                                                                                                                                                                                                                                                                                                                  | -                                                                                                                                                                                                                    | -                                                                                                     | C_umbii_02097_mRNA_8.1  | -                    |
| GF004172 | 0                      | 1                | 0                 | Hypothetical protein (1)                                          | -                                                                                                                                                                                                                                                                                                                                                                  | -                                                                                                                                                                                                                    | -                                                                                                     | C_umbii_02097_mRNA_7.1  | -                    |
| GF004171 | 0                      | 1                | 0                 | Hypothetical protein (1)                                          | -                                                                                                                                                                                                                                                                                                                                                                  | -                                                                                                                                                                                                                    | -                                                                                                     | C_umbii_02097_mRNA_6.1  | -                    |
| GF004170 | 0                      | 1                | 0                 | Hypothetical protein (1)                                          | -                                                                                                                                                                                                                                                                                                                                                                  | -                                                                                                                                                                                                                    | -                                                                                                     | C_umbii_02097_mRNA_6.1  | -                    |
| GF004169 | 0                      | 1                | 0                 | Hypothetical protein (1)                                          | -                                                                                                                                                                                                                                                                                                                                                                  | -                                                                                                                                                                                                                    | -                                                                                                     | C_umbii_02097_mRNA_4.1  | -                    |
| GF004168 | 0                      | 1                | 0                 | Hypothetical protein (1)                                          | -                                                                                                                                                                                                                                                                                                                                                                  | -                                                                                                                                                                                                                    | -                                                                                                     | C_umbii_02097_mRNA_3.1  | -                    |
| GF004167 | 0                      | 1                | 0                 | Hypothetical protein (1)                                          | -                                                                                                                                                                                                                                                                                                                                                                  | -                                                                                                                                                                                                                    | -                                                                                                     | C_umbii_02097_mRNA_10.1 | -                    |
| GF004166 | 0                      | 1                | 0                 | Hypothetical protein (1)                                          | -                                                                                                                                                                                                                                                                                                                                                                  | -                                                                                                                                                                                                                    | -                                                                                                     | C_umbii_02097_mRNA_1.1  | -                    |
| GF004165 | 0                      | 1                | 0                 | Hypothetical protein (1)                                          | -                                                                                                                                                                                                                                                                                                                                                                  | -                                                                                                                                                                                                                    | -                                                                                                     | C_umbii_02096_mRNA_6.1  | -                    |
| GF004164 | 0                      | 1                | 0                 | Hypothetical protein (1)                                          | -                                                                                                                                                                                                                                                                                                                                                                  | -                                                                                                                                                                                                                    | -                                                                                                     | C_umbii_02096_mRNA_5.1  | -                    |
| GF004163 | 0                      | 1                | 0                 | Hypothetical protein (1)                                          | -                                                                                                                                                                                                                                                                                                                                                                  | -                                                                                                                                                                                                                    | -                                                                                                     | C_umbii_02096_mRNA_4.1  | -                    |
| GF004162 | 0                      | 1                | 0                 | Hypothetical protein (1)                                          | -                                                                                                                                                                                                                                                                                                                                                                  | -                                                                                                                                                                                                                    | -                                                                                                     | C_umbii_02096_mRNA_2.1  | -                    |
| GF004161 | 0                      | 1                | 0                 | Hypothetical protein (1)                                          | -                                                                                                                                                                                                                                                                                                                                                                  | -                                                                                                                                                                                                                    | -                                                                                                     | C_umbii_02094_mRNA_7.1  | -                    |
| GF004160 | 0                      | 1                | 0                 | Hypothetical protein (1)                                          | -                                                                                                                                                                                                                                                                                                                                                                  | -                                                                                                                                                                                                                    | -                                                                                                     | C_umbii_02094_mRNA_6.1  | -                    |
| GF004159 | 0                      | 1                | 0                 | Hypothetical protein (1)                                          | -                                                                                                                                                                                                                                                                                                                                                                  | -                                                                                                                                                                                                                    | -                                                                                                     | C_umbii_02094_mRNA_5.1  | -                    |
| GF004158 | 0                      | 1                | 0                 | Hypothetical protein (1)                                          | -                                                                                                                                                                                                                                                                                                                                                                  | -                                                                                                                                                                                                                    | -                                                                                                     | C_umbii_02094_mRNA_4.1  | -                    |

| ID       | Num. in C. crottenstei | Num. in C. caudis | Num. in P. putida | Note                                                               | GO                                                                                                                                                                                                                                                                                                                                                                                                                  | InterPro                                                                                                                                                                                                                                                                                                                                                         | Members in C. crottenstei | Members in C. caudis   | Members in P. putida |
|----------|------------------------|-------------------|-------------------|--------------------------------------------------------------------|---------------------------------------------------------------------------------------------------------------------------------------------------------------------------------------------------------------------------------------------------------------------------------------------------------------------------------------------------------------------------------------------------------------------|------------------------------------------------------------------------------------------------------------------------------------------------------------------------------------------------------------------------------------------------------------------------------------------------------------------------------------------------------------------|---------------------------|------------------------|----------------------|
| GF042259 | 0                      | 1                 | 0                 | Hypothetical protein (1)                                           |                                                                                                                                                                                                                                                                                                                                                                                                                     |                                                                                                                                                                                                                                                                                                                                                                  |                           | C_ushii_02094_mRNA_2,1 | -                    |
| GF042258 | 0                      | 1                 | 0                 | Hypothetical protein (1)                                           |                                                                                                                                                                                                                                                                                                                                                                                                                     |                                                                                                                                                                                                                                                                                                                                                                  |                           | C_ushii_02094_mRNA_3,1 | -                    |
| GF042257 | 0                      | 1                 | 0                 | Hypothetical protein (1)                                           |                                                                                                                                                                                                                                                                                                                                                                                                                     |                                                                                                                                                                                                                                                                                                                                                                  |                           | C_ushii_02093_mRNA_4,1 | -                    |
| GF042256 | 0                      | 1                 | 0                 | Hypothetical protein (1)                                           |                                                                                                                                                                                                                                                                                                                                                                                                                     |                                                                                                                                                                                                                                                                                                                                                                  |                           | C_ushii_02093_mRNA_3,1 | -                    |
| GF042265 | 0                      | 1                 | 0                 | Hypothetical protein (1)                                           |                                                                                                                                                                                                                                                                                                                                                                                                                     |                                                                                                                                                                                                                                                                                                                                                                  |                           | C_ushii_02093_mRNA_2,1 | -                    |
| GF042264 | 0                      | 1                 | 0                 | Hypothetical protein (1)                                           |                                                                                                                                                                                                                                                                                                                                                                                                                     | Retromer-spanning gag domain [IPR005162] (1);                                                                                                                                                                                                                                                                                                                    |                           | C_ushii_02093_mRNA_1,1 | -                    |
| GF042263 | 0                      | 1                 | 0                 | DNA mismatch repair protein MutS2-like (1)                         | ribosome [GO:0005840 cellular_component] (1); nucleic acid binding [GO:0003676 molecular_function] (1); structural constituent of ribosome [GO:0003735 molecular_function] (1); intracellular [GO:0006527 cellular_component] (1); translation [GO:0006412 biological_process] (1)                                                                                                                                  | Ribosomal protein L15, conserved site [IPR011961] (1); Ribosomal protein L18cL15P [IPR021131] (1); Ribonuclease H-like domain [IPR012337] (1)                                                                                                                                                                                                                    |                           | C_ushii_02092_mRNA_1,1 | -                    |
| GF042261 | 0                      | 1                 | 0                 | Hypothetical protein (1)                                           |                                                                                                                                                                                                                                                                                                                                                                                                                     |                                                                                                                                                                                                                                                                                                                                                                  |                           | C_ushii_02091_mRNA_1,1 | -                    |
| GF042260 | 0                      | 1                 | 0                 | Hypothetical protein (1)                                           |                                                                                                                                                                                                                                                                                                                                                                                                                     |                                                                                                                                                                                                                                                                                                                                                                  |                           | C_ushii_02090_mRNA_1,1 | -                    |
| GF042259 | 0                      | 1                 | 0                 | Hypothetical protein (1)                                           |                                                                                                                                                                                                                                                                                                                                                                                                                     |                                                                                                                                                                                                                                                                                                                                                                  |                           | C_ushii_02089_mRNA_5,1 | -                    |
| GF042258 | 0                      | 1                 | 0                 | Histone H2A (1)                                                    | DNA binding [GO:0003677 molecular_function] (1); nucleus [GO:0005634 cellular_component] (1); protein heterodimerization activity [GO:0046982 molecular_function] (1); nucleosome [GO:0000786 cellular_component] (1)                                                                                                                                                                                               | Histone H2A conserved site [IPR022458] (1); Histone H2A-H2B-H3 [IPR007123] (1); Histone-fold [IPR009072] (1); Histone H2A [IPR002119] (1)                                                                                                                                                                                                                        |                           | C_ushii_02089_mRNA_1,1 | -                    |
| GF042257 | 0                      | 1                 | 0                 | Hypothetical protein (1)                                           |                                                                                                                                                                                                                                                                                                                                                                                                                     |                                                                                                                                                                                                                                                                                                                                                                  |                           | C_ushii_02088_mRNA_1,1 | -                    |
| GF042256 | 0                      | 1                 | 0                 | Hypothetical protein (1)                                           |                                                                                                                                                                                                                                                                                                                                                                                                                     |                                                                                                                                                                                                                                                                                                                                                                  |                           | C_ushii_02087_mRNA_2,1 | -                    |
| GF042255 | 0                      | 1                 | 0                 | Hypothetical protein (1)                                           |                                                                                                                                                                                                                                                                                                                                                                                                                     |                                                                                                                                                                                                                                                                                                                                                                  |                           | C_ushii_02087_mRNA_1,1 | -                    |
| GF042254 | 0                      | 1                 | 0                 | gDSL esterase/phage 7 (1)                                          | protein binding [GO:0005515 molecular_function] (1)                                                                                                                                                                                                                                                                                                                                                                 | Leucine-rich repeat domain, L domain-like [IPR022675] (1); Leucine-rich repeat [IPR001611] (1)                                                                                                                                                                                                                                                                   |                           | C_ushii_02085_mRNA_1,1 | -                    |
| GF042253 | 0                      | 1                 | 0                 | Hypothetical protein (1)                                           |                                                                                                                                                                                                                                                                                                                                                                                                                     |                                                                                                                                                                                                                                                                                                                                                                  |                           | C_ushii_02084_mRNA_5,1 | -                    |
| GF042252 | 0                      | 1                 | 0                 | Hypothetical protein (1)                                           |                                                                                                                                                                                                                                                                                                                                                                                                                     |                                                                                                                                                                                                                                                                                                                                                                  |                           | C_ushii_02084_mRNA_4,1 | -                    |
| GF042251 | 0                      | 1                 | 0                 | Hypothetical protein (1)                                           | ATP binding [GO:0005524 molecular_function] (1); protein phosphorylation [GO:0006468 biological_process] (1); protein kinase activity [GO:0004672 molecular_function] (1)                                                                                                                                                                                                                                           | Serine/threonine-protein kinase, active site [IPR008271] (1); Protein kinase domain [IPR000710] (1); Protein kinase-like domain [IPR011009] (1)                                                                                                                                                                                                                  |                           | C_ushii_02084_mRNA_3,1 | -                    |
| GF042250 | 0                      | 1                 | 0                 | Hypothetical protein (1)                                           |                                                                                                                                                                                                                                                                                                                                                                                                                     |                                                                                                                                                                                                                                                                                                                                                                  |                           | C_ushii_02083_mRNA_5,1 | -                    |
| GF042249 | 0                      | 1                 | 0                 | Hypothetical protein (1)                                           |                                                                                                                                                                                                                                                                                                                                                                                                                     |                                                                                                                                                                                                                                                                                                                                                                  |                           | C_ushii_02083_mRNA_3,1 | -                    |
| GF042248 | 0                      | 1                 | 0                 | Sesquiterpene synthase (1)                                         | DNA binding [GO:0003677 molecular_function] (1); nucleic acid binding [GO:0003676 molecular_function] (1); terpene synthase activity [GO:0010333 molecular_function] (1); lyase activity [GO:0016829 molecular_function] (1); magnesium ion binding [GO:0000287 molecular_function] (1); metabolic process [GO:0008152 biological_process] (1)                                                                      | Terpenoid cyclase/terpene synthase [IPR008930] (1); Zinc finger, BED-type [IPR003656] (1); Terpene synthase, N-terminal domain [IPR008905] (1); Ribonuclease H-like domain [IPR012337] (1); Terpene synthase, metal-binding domain [IPR006530] (1); Isoprenoid synthase domain [IPR008949] (1)                                                                   |                           | C_ushii_02083_mRNA_2,1 | -                    |
| GF042247 | 0                      | 1                 | 0                 | Hypothetical protein (1)                                           |                                                                                                                                                                                                                                                                                                                                                                                                                     |                                                                                                                                                                                                                                                                                                                                                                  |                           | C_ushii_02082_mRNA_3,1 | -                    |
| GF042246 | 0                      | 1                 | 0                 | Probable xyloglucan 2-O-methyltransferase/hydrolase protein (1)    | cellular glycan metabolic process [GO:0006773 biological_process] (1); apoptosis [GO:0043046 cellular_component] (1); xyloglucan xyloglucosyl transferase activity [GO:0016762 molecular_function] (1); carbohydrate metabolic process [GO:0005975 biological_process] (1); cell wall [GO:0005618 cellular_component] (1); hydrolase activity, hydrolyzing O-glycosyl compounds [GO:0004553 molecular_function] (1) | Concanavalin A-like lectin/glycanase domain [IPR013201] (1); Glycoside hydrolase family 16 [IPR000757] (1); Xyloglucan endo-1,4-glycosylase, C-terminal [IPR010713] (1)                                                                                                                                                                                          |                           | C_ushii_02081_mRNA_3,1 | -                    |
| GF042245 | 0                      | 1                 | 0                 | Hypothetical protein (1)                                           |                                                                                                                                                                                                                                                                                                                                                                                                                     |                                                                                                                                                                                                                                                                                                                                                                  |                           | C_ushii_02081_mRNA_2,1 | -                    |
| GF042244 | 0                      | 1                 | 0                 | Cytokinin ribicase 5'-monophosphate phosphohydrolyase (1)          |                                                                                                                                                                                                                                                                                                                                                                                                                     |                                                                                                                                                                                                                                                                                                                                                                  |                           | C_ushii_02080_mRNA_4,1 | -                    |
| GF042243 | 0                      | 1                 | 0                 | Hypothetical protein (1)                                           |                                                                                                                                                                                                                                                                                                                                                                                                                     |                                                                                                                                                                                                                                                                                                                                                                  |                           | C_ushii_02079_mRNA_9,1 | -                    |
| GF042242 | 0                      | 1                 | 0                 | Hypothetical protein (1)                                           |                                                                                                                                                                                                                                                                                                                                                                                                                     |                                                                                                                                                                                                                                                                                                                                                                  |                           | C_ushii_02079_mRNA_6,1 | -                    |
| GF042241 | 0                      | 1                 | 0                 | Hypothetical protein (1)                                           |                                                                                                                                                                                                                                                                                                                                                                                                                     |                                                                                                                                                                                                                                                                                                                                                                  |                           | C_ushii_02079_mRNA_3,1 | -                    |
| GF042240 | 0                      | 1                 | 0                 | Non-LTR retroviral reverse transcriptase-like (1)                  | nucleic acid binding [GO:0003676 molecular_function] (1); RNA-DNA hybrid ribonuclease activity [GO:004523 molecular_function] (1)                                                                                                                                                                                                                                                                                   | Ribonuclease H domain [IPR002156] (1); Reverse transcriptase zinc-binding domain [IPR006060] (1); Ribonuclease H-like domain [IPR012337] (1); Domain of unknown function DUF4283 [IPR025558] (1)                                                                                                                                                                 |                           | C_ushii_02079_mRNA_2,1 | -                    |
| GF042239 | 0                      | 1                 | 0                 | Hypothetical protein (1)                                           |                                                                                                                                                                                                                                                                                                                                                                                                                     |                                                                                                                                                                                                                                                                                                                                                                  |                           | C_ushii_02079_mRNA_1,1 | -                    |
| GF042238 | 0                      | 1                 | 0                 | Hypothetical protein (1)                                           |                                                                                                                                                                                                                                                                                                                                                                                                                     |                                                                                                                                                                                                                                                                                                                                                                  |                           | C_ushii_02078_mRNA_2,1 | -                    |
| GF042237 | 0                      | 1                 | 0                 | LRR receptor-like kinase family protein (1)                        | protein binding [GO:0005515 molecular_function] (1); ATP binding [GO:0005524 molecular_function] (1); protein phosphorylation [GO:0006468 biological_process] (1); protein kinase activity [GO:0004672 molecular_function] (1)                                                                                                                                                                                      | Leucine-rich repeat [IPR001611] (1); Leucine-rich repeat-containing N-terminal, plant-type [IPR013201] (1); Protein kinase, ATP binding site [IPR017411] (1); Leucine-rich repeat, typical subtype [IPR013591] (1); Protein kinase-like domain [IPR011009] (1); Leucine-rich repeat domain, L domain-like [IPR022675] (1); Protein kinase domain [IPR007191] (1) |                           | C_ushii_02077_mRNA_5,1 | -                    |
| GF042236 | 0                      | 1                 | 0                 | Leucine-rich repeat protein kinase family protein (1)              | protein kinase activity [GO:0004672 molecular_function] (1); protein phosphorylation [GO:0006468 biological_process] (1); ATP binding [GO:0005524 molecular_function] (1); protein binding [GO:0005515 molecular_function] (1)                                                                                                                                                                                      | Leucine-rich repeat [IPR001611] (1); Serine/threonine-protein kinase, active site [IPR008271] (1); Protein kinase-like domain [IPR011009] (1); Leucine-rich repeat domain, L domain-like [IPR022675] (1); Protein kinase domain [IPR007191] (1)                                                                                                                  |                           | C_ushii_02077_mRNA_3,1 | -                    |
| GF042235 | 0                      | 1                 | 0                 | 4-methyl-5(B-hydroxyethyl)-thiazole monophosphate biosynthesis (1) |                                                                                                                                                                                                                                                                                                                                                                                                                     |                                                                                                                                                                                                                                                                                                                                                                  |                           | C_ushii_02077_mRNA_2,1 | -                    |
| GF042234 | 0                      | 1                 | 0                 | Chaperone protein dnaJ 8, chloroplast (1)                          |                                                                                                                                                                                                                                                                                                                                                                                                                     |                                                                                                                                                                                                                                                                                                                                                                  |                           | C_ushii_02073_mRNA_4,1 | -                    |
| GF042233 | 0                      | 1                 | 0                 | Hypothetical protein (1)                                           |                                                                                                                                                                                                                                                                                                                                                                                                                     |                                                                                                                                                                                                                                                                                                                                                                  |                           | C_ushii_02072_mRNA_4,1 | -                    |
| GF042232 | 0                      | 1                 | 0                 | Hypothetical protein (1)                                           |                                                                                                                                                                                                                                                                                                                                                                                                                     |                                                                                                                                                                                                                                                                                                                                                                  |                           | C_ushii_02072_mRNA_3,1 | -                    |
| GF042231 | 0                      | 1                 | 0                 | Hypothetical protein (1)                                           |                                                                                                                                                                                                                                                                                                                                                                                                                     |                                                                                                                                                                                                                                                                                                                                                                  |                           | C_ushii_02072_mRNA_1,1 | -                    |
| GF042230 | 0                      | 1                 | 0                 | Hypothetical protein (1)                                           |                                                                                                                                                                                                                                                                                                                                                                                                                     |                                                                                                                                                                                                                                                                                                                                                                  |                           | C_ushii_02071_mRNA_2,1 | -                    |
| GF042229 | 0                      | 1                 | 0                 | Hypothetical protein (1)                                           |                                                                                                                                                                                                                                                                                                                                                                                                                     |                                                                                                                                                                                                                                                                                                                                                                  |                           | C_ushii_02071_mRNA_1,1 | -                    |
| GF042228 | 0                      | 1                 | 0                 | Hypothetical protein (1)                                           |                                                                                                                                                                                                                                                                                                                                                                                                                     |                                                                                                                                                                                                                                                                                                                                                                  |                           | C_ushii_02070_mRNA_6,1 | -                    |
| GF042227 | 0                      | 1                 | 0                 | Hypothetical protein (1)                                           |                                                                                                                                                                                                                                                                                                                                                                                                                     |                                                                                                                                                                                                                                                                                                                                                                  |                           | C_ushii_02070_mRNA_4,1 | -                    |
| GF042226 | 0                      | 1                 | 0                 | Aldo-keto reductase family oxidoreductase (1)                      | oxidation-reduction process [GO:005511 biological_process] (1); oxidoreductase activity [GO:0016491 molecular_function] (1)                                                                                                                                                                                                                                                                                         | Aldo-keto reductase/potassium channel subunit beta [IPR001395] (1); NADP-dependent oxidoreductase domain [IPR023210] (1); Aldo-keto reductase, conserved site [IPR018170] (1)                                                                                                                                                                                    |                           | C_ushii_02069_mRNA_5,1 | -                    |
| GF042225 | 0                      | 1                 | 0                 | NADPH-dependent codeinone reductase-like protein (1)               | oxidoreductase activity [GO:0016491 molecular_function] (1); oxidation-reduction process [GO:0055114 biological_process] (1)                                                                                                                                                                                                                                                                                        | Aldo-keto reductase/potassium channel subunit beta [IPR001395] (1); Aldo-keto reductase [IPR020471] (1); Aldo-keto reductase, conserved site [IPR018170] (1); NADP-dependent oxidoreductase domain [IPR023210] (1)                                                                                                                                               |                           | C_ushii_02069_mRNA_4,1 | -                    |
| GF042224 | 0                      | 1                 | 0                 | Hycosamine 6-dioxygenase, putative isoform 1 (1)                   | oxidoreductase activity [GO:0016491 molecular_function] (1); oxidation-reduction process [GO:0055114 biological_process] (1); transporter activity [GO:0005215 molecular_function] (1); membrane [GO:0016022 cellular_component] (1); transport [GO:0006810 biological_process] (1)                                                                                                                                 | Oxoglutarate iron-dependent dioxygenase [IPR001213] (1); Isopenicillin N synthase-like [IPR027443] (1)                                                                                                                                                                                                                                                           |                           | C_ushii_02069_mRNA_2,1 | -                    |
| GF042223 | 0                      | 1                 | 0                 | Hypothetical protein (1)                                           |                                                                                                                                                                                                                                                                                                                                                                                                                     |                                                                                                                                                                                                                                                                                                                                                                  |                           | C_ushii_02066_mRNA_7,1 | -                    |
| GF042222 | 0                      | 1                 | 0                 | Hypothetical protein (1)                                           |                                                                                                                                                                                                                                                                                                                                                                                                                     |                                                                                                                                                                                                                                                                                                                                                                  |                           | C_ushii_02066_mRNA_5,1 | -                    |
| GF042221 | 0                      | 1                 | 0                 | Hypothetical protein (1)                                           |                                                                                                                                                                                                                                                                                                                                                                                                                     |                                                                                                                                                                                                                                                                                                                                                                  |                           | C_ushii_02066_mRNA_3,1 | -                    |
| GF042220 | 0                      | 1                 | 0                 | Hypothetical protein (1)                                           |                                                                                                                                                                                                                                                                                                                                                                                                                     |                                                                                                                                                                                                                                                                                                                                                                  |                           | C_ushii_02066_mRNA_2,1 | -                    |
| GF042219 | 0                      | 1                 | 0                 | Hypothetical protein (1)                                           |                                                                                                                                                                                                                                                                                                                                                                                                                     |                                                                                                                                                                                                                                                                                                                                                                  |                           | C_ushii_02065_mRNA_1,1 | -                    |
| GF042218 | 0                      | 1                 | 0                 | Hypothetical protein (1)                                           |                                                                                                                                                                                                                                                                                                                                                                                                                     |                                                                                                                                                                                                                                                                                                                                                                  |                           | C_ushii_02064_mRNA_3,1 | -                    |
| GF042217 | 0                      | 1                 | 0                 | TR-NBS-LRR class disease resistance protein (1)                    | ADP binding [GO:0045531 molecular_function] (1)                                                                                                                                                                                                                                                                                                                                                                     | NB-ARC [IPR021812] (1); P-loop containing nucleoside triphosphate hydrolase [IPR027417] (1)                                                                                                                                                                                                                                                                      |                           | C_ushii_02064_mRNA_1,1 | -                    |
| GF042216 | 0                      | 1                 | 0                 | Hypothetical protein (1)                                           |                                                                                                                                                                                                                                                                                                                                                                                                                     |                                                                                                                                                                                                                                                                                                                                                                  |                           | C_ushii_02063_mRNA_7,1 | -                    |
| GF042215 | 0                      | 1                 | 0                 | Hypothetical protein (1)                                           |                                                                                                                                                                                                                                                                                                                                                                                                                     |                                                                                                                                                                                                                                                                                                                                                                  |                           | C_ushii_02063_mRNA_6,1 | -                    |
| GF042214 | 0                      | 1                 | 0                 | Hypothetical protein (1)                                           |                                                                                                                                                                                                                                                                                                                                                                                                                     |                                                                                                                                                                                                                                                                                                                                                                  |                           | C_ushii_02063_mRNA_2,1 | -                    |

| ID       | Num. in <i>C. crotolariae</i> | Num. in <i>C. canalis</i> | Num. in <i>P. trifidata</i> | Note | GO                                                                                                                                                                                                                                                                                                                                                                                                                                                                                                                                                                     | InterPro                                                                                                                                                                                                                                                                                                       | Members in <i>Crotolariae</i>                                                                                                                                                                                                                                                                                                                                                                                                                                                                                                                                                                                | Members in <i>Canalis</i> | Members in <i>Trifidata</i> |   |
|----------|-------------------------------|---------------------------|-----------------------------|------|------------------------------------------------------------------------------------------------------------------------------------------------------------------------------------------------------------------------------------------------------------------------------------------------------------------------------------------------------------------------------------------------------------------------------------------------------------------------------------------------------------------------------------------------------------------------|----------------------------------------------------------------------------------------------------------------------------------------------------------------------------------------------------------------------------------------------------------------------------------------------------------------|--------------------------------------------------------------------------------------------------------------------------------------------------------------------------------------------------------------------------------------------------------------------------------------------------------------------------------------------------------------------------------------------------------------------------------------------------------------------------------------------------------------------------------------------------------------------------------------------------------------|---------------------------|-----------------------------|---|
| GF004213 | 0                             | 1                         | 1                           | 0    | transcription factor activity, sequence-specific DNA binding [GO:0003700] molecular_function (1); integral component of membrane [GO:0016021] cellular_component (1); cation transport [GO:000612 biological_process] (1); zinc ion binding [GO:0008270] molecular_function (1); response-specific DNA binding [GO:0043565] molecular_function (1); regulation of transcription, DNA-templated [GO:0006355 biological_process] (1); transmembrane transport [GO:0050805 biological_process] (1); solute proton antiporter activity [GO:0015299] molecular_function (1) | Cation/H <sup>+</sup> exchanger [IPR006153] (1); Zinc finger, NHR-GATA-type [IPR013088] (1); Zinc finger, GATA-type [IPR006079] (1)                                                                                                                                                                            | -                                                                                                                                                                                                                                                                                                                                                                                                                                                                                                                                                                                                            | C_umhii_02062_mRNA_3_1    | -                           |   |
| GF004212 | 0                             | 1                         | 1                           | 0    | Hypothetical protein (1)                                                                                                                                                                                                                                                                                                                                                                                                                                                                                                                                               | Metallothionein, family 15, plant [IPR000347] (4)                                                                                                                                                                                                                                                              | -                                                                                                                                                                                                                                                                                                                                                                                                                                                                                                                                                                                                            | C_umhii_02062_mRNA_1_1    | -                           |   |
| GF004211 | 0                             | 1                         | 1                           | 0    | Hypothetical protein (1)                                                                                                                                                                                                                                                                                                                                                                                                                                                                                                                                               | -                                                                                                                                                                                                                                                                                                              | -                                                                                                                                                                                                                                                                                                                                                                                                                                                                                                                                                                                                            | C_umhii_02061_mRNA_4_1    | -                           |   |
| GF004210 | 0                             | 1                         | 1                           | 0    | Hypothetical protein (1)                                                                                                                                                                                                                                                                                                                                                                                                                                                                                                                                               | -                                                                                                                                                                                                                                                                                                              | -                                                                                                                                                                                                                                                                                                                                                                                                                                                                                                                                                                                                            | C_umhii_02060_mRNA_2_1    | -                           |   |
| GF004209 | 0                             | 1                         | 1                           | 0    | Hypothetical protein (1)                                                                                                                                                                                                                                                                                                                                                                                                                                                                                                                                               | -                                                                                                                                                                                                                                                                                                              | -                                                                                                                                                                                                                                                                                                                                                                                                                                                                                                                                                                                                            | C_umhii_02059_mRNA_3_1    | -                           |   |
| GF004208 | 0                             | 1                         | 1                           | 0    | Hypothetical protein (1)                                                                                                                                                                                                                                                                                                                                                                                                                                                                                                                                               | Gag-polyprotein of LTR copia-type [IPR029472] (4)                                                                                                                                                                                                                                                              | -                                                                                                                                                                                                                                                                                                                                                                                                                                                                                                                                                                                                            | C_umhii_02059_mRNA_1_1    | -                           |   |
| GF004207 | 0                             | 1                         | 1                           | 0    | Hypothetical protein (1)                                                                                                                                                                                                                                                                                                                                                                                                                                                                                                                                               | -                                                                                                                                                                                                                                                                                                              | -                                                                                                                                                                                                                                                                                                                                                                                                                                                                                                                                                                                                            | C_umhii_02058_mRNA_5_1    | -                           |   |
| GF004206 | 0                             | 1                         | 1                           | 0    | Hypothetical protein (1)                                                                                                                                                                                                                                                                                                                                                                                                                                                                                                                                               | -                                                                                                                                                                                                                                                                                                              | -                                                                                                                                                                                                                                                                                                                                                                                                                                                                                                                                                                                                            | C_umhii_02058_mRNA_4_1    | -                           |   |
| GF004205 | 0                             | 1                         | 1                           | 0    | Leucine-rich repeat protein kinase family protein, putative (1)                                                                                                                                                                                                                                                                                                                                                                                                                                                                                                        | protein binding [GO:0005515] molecular_function (1); protein phosphorylation [GO:0006468] biological_process (1); protein kinase activity [GO:0004672] molecular_function (1); ATP binding [GO:0005524] molecular_function (1)                                                                                 | Leucine-rich repeat, typical subtype [IPR003591] (1); Leucine-rich repeat domain, L domain-like [IPR026751] (1); Protein kinase-like domain [IPR011009] (1); Concanavalin A-like lectin/glucanase domain [IPR013320] (1); Protein kinase domain [IPR000719] (1); Leucine-rich repeat-containing N-terminal, plant-type [IPR016111] (1); Protein kinase, ATP binding site [IPR017441] (1); Serine/threonine-protein kinase, active site [IPR006271] (1); Leucine-rich repeat-containing N-terminal, plant-type [IPR013210] (1); Serine/threonine-specificity protein kinase, catalytic domain [IPR002290] (1) | -                         | C_umhii_02058_mRNA_2_1      | - |
| GF004204 | 0                             | 1                         | 1                           | 0    | Hypothetical leucine rich repeat protein (1)                                                                                                                                                                                                                                                                                                                                                                                                                                                                                                                           | protein binding [GO:0005515] molecular_function (1)                                                                                                                                                                                                                                                            | Leucine-rich repeat domain, L domain-like [IPR026751] (1); Leucine-rich repeat, typical subtype [IPR003591] (1); Leucine-rich repeat-containing N-terminal, plant-type [IPR013210] (1); Leucine-rich repeat [IPR006111] (4)                                                                                                                                                                                                                                                                                                                                                                                  | -                         | C_umhii_02058_mRNA_1_1      | - |
| GF004203 | 0                             | 1                         | 1                           | 0    | Hypothetical protein (1)                                                                                                                                                                                                                                                                                                                                                                                                                                                                                                                                               | -                                                                                                                                                                                                                                                                                                              | -                                                                                                                                                                                                                                                                                                                                                                                                                                                                                                                                                                                                            | C_umhii_02057_mRNA_9_1    | -                           |   |
| GF004202 | 0                             | 1                         | 1                           | 0    | Hypothetical protein (1)                                                                                                                                                                                                                                                                                                                                                                                                                                                                                                                                               | -                                                                                                                                                                                                                                                                                                              | -                                                                                                                                                                                                                                                                                                                                                                                                                                                                                                                                                                                                            | C_umhii_02057_mRNA_6_1    | -                           |   |
| GF004201 | 0                             | 1                         | 1                           | 0    | Hypothetical protein (1)                                                                                                                                                                                                                                                                                                                                                                                                                                                                                                                                               | -                                                                                                                                                                                                                                                                                                              | -                                                                                                                                                                                                                                                                                                                                                                                                                                                                                                                                                                                                            | C_umhii_02057_mRNA_5_1    | -                           |   |
| GF004200 | 0                             | 1                         | 1                           | 0    | Monosaccharide transport protein (1)                                                                                                                                                                                                                                                                                                                                                                                                                                                                                                                                   | -                                                                                                                                                                                                                                                                                                              | -                                                                                                                                                                                                                                                                                                                                                                                                                                                                                                                                                                                                            | C_umhii_02057_mRNA_3_1    | -                           |   |
| GF004199 | 0                             | 1                         | 1                           | 0    | Hypothetical protein (1)                                                                                                                                                                                                                                                                                                                                                                                                                                                                                                                                               | -                                                                                                                                                                                                                                                                                                              | -                                                                                                                                                                                                                                                                                                                                                                                                                                                                                                                                                                                                            | C_umhii_02056_mRNA_2_1    | -                           |   |
| GF004198 | 0                             | 1                         | 1                           | 0    | LRR receptor-like kinase family protein (1)                                                                                                                                                                                                                                                                                                                                                                                                                                                                                                                            | ATP binding [GO:0005524] molecular_function (1); protein phosphorylation [GO:0006468] biological_process (1); protein kinase activity [GO:0004672] molecular_function (1); protein binding [GO:0005515] molecular_function (1)                                                                                 | Leucine-rich repeat [IPR006111] (1); Serine/threonine-specificity protein kinase, catalytic domain [IPR002290] (1); Leucine-rich repeat-containing N-terminal, plant-type [IPR013210] (1); Serine/threonine-protein kinase, active site [IPR006271] (1); Protein kinase, ATP binding site [IPR017441] (1); Concanavalin A-like lectin/glucanase domain [IPR013320] (1); Protein kinase-like domain [IPR011009] (1); Leucine-rich repeat domain, L domain-like [IPR026751] (1); Leucine-rich repeat, typical subtype [IPR003591] (1); Protein kinase domain [IPR000719] (1)                                   | -                         | C_umhii_02055_mRNA_2_1      | - |
| GF004197 | 0                             | 1                         | 1                           | 0    | Hypothetical protein (1)                                                                                                                                                                                                                                                                                                                                                                                                                                                                                                                                               | -                                                                                                                                                                                                                                                                                                              | -                                                                                                                                                                                                                                                                                                                                                                                                                                                                                                                                                                                                            | C_umhii_02055_mRNA_1_1    | -                           |   |
| GF004196 | 0                             | 1                         | 1                           | 0    | Hypothetical protein (1)                                                                                                                                                                                                                                                                                                                                                                                                                                                                                                                                               | -                                                                                                                                                                                                                                                                                                              | -                                                                                                                                                                                                                                                                                                                                                                                                                                                                                                                                                                                                            | C_umhii_02054_mRNA_8_1    | -                           |   |
| GF004195 | 0                             | 1                         | 1                           | 0    | Hypothetical protein (1)                                                                                                                                                                                                                                                                                                                                                                                                                                                                                                                                               | -                                                                                                                                                                                                                                                                                                              | -                                                                                                                                                                                                                                                                                                                                                                                                                                                                                                                                                                                                            | C_umhii_02054_mRNA_6_1    | -                           |   |
| GF004194 | 0                             | 1                         | 1                           | 0    | Hypothetical protein (1)                                                                                                                                                                                                                                                                                                                                                                                                                                                                                                                                               | -                                                                                                                                                                                                                                                                                                              | -                                                                                                                                                                                                                                                                                                                                                                                                                                                                                                                                                                                                            | C_umhii_02054_mRNA_4_1    | -                           |   |
| GF004193 | 0                             | 1                         | 1                           | 0    | Hypothetical protein (1)                                                                                                                                                                                                                                                                                                                                                                                                                                                                                                                                               | -                                                                                                                                                                                                                                                                                                              | -                                                                                                                                                                                                                                                                                                                                                                                                                                                                                                                                                                                                            | C_umhii_02054_mRNA_10_1   | -                           |   |
| GF004192 | 0                             | 1                         | 1                           | 0    | Hypothetical protein (1)                                                                                                                                                                                                                                                                                                                                                                                                                                                                                                                                               | -                                                                                                                                                                                                                                                                                                              | -                                                                                                                                                                                                                                                                                                                                                                                                                                                                                                                                                                                                            | C_umhii_02054_mRNA_1_1    | -                           |   |
| GF004191 | 0                             | 1                         | 1                           | 0    | Hypothetical protein (1)                                                                                                                                                                                                                                                                                                                                                                                                                                                                                                                                               | protein binding [GO:0005515] molecular_function (1)                                                                                                                                                                                                                                                            | Ankyrin repeat-containing domain [IPR020683] (1); Ankyrin repeat [IPR021101] (1); Regulatory protein NPR, central domain [IPR024228] (1)                                                                                                                                                                                                                                                                                                                                                                                                                                                                     | -                         | C_umhii_02053_mRNA_7_1      | - |
| GF004190 | 0                             | 1                         | 1                           | 0    | Hypothetical protein (1)                                                                                                                                                                                                                                                                                                                                                                                                                                                                                                                                               | -                                                                                                                                                                                                                                                                                                              | -                                                                                                                                                                                                                                                                                                                                                                                                                                                                                                                                                                                                            | C_umhii_02053_mRNA_6_1    | -                           |   |
| GF004189 | 0                             | 1                         | 1                           | 0    | Nonexpressor of pathogenesis-related protein 1 (1)                                                                                                                                                                                                                                                                                                                                                                                                                                                                                                                     | protein binding [GO:0005515] molecular_function (1)                                                                                                                                                                                                                                                            | Ankyrin repeat-containing domain [IPR020683] (1); NPR1/NM1-like, C-terminal [IPR021094] (1); FTB/POZ domain [IPR000210] (1); Ankyrin repeat domain [IPR021101] (1); Regulatory protein NPR, central domain [IPR024228] (1); SKP1/BTB/POZ domain [IPR011333] (1)                                                                                                                                                                                                                                                                                                                                              | -                         | C_umhii_02053_mRNA_1_1      | - |
| GF004188 | 0                             | 1                         | 1                           | 0    | Hypothetical protein (1)                                                                                                                                                                                                                                                                                                                                                                                                                                                                                                                                               | chromatin binding [GO:0003682] molecular_function (1)                                                                                                                                                                                                                                                          | Bromo adjacent homology (BAH) domain [IPR010251] (4)                                                                                                                                                                                                                                                                                                                                                                                                                                                                                                                                                         | -                         | C_umhii_02052_mRNA_3_1      | - |
| GF004187 | 0                             | 1                         | 1                           | 0    | Hypothetical protein (1)                                                                                                                                                                                                                                                                                                                                                                                                                                                                                                                                               | -                                                                                                                                                                                                                                                                                                              | -                                                                                                                                                                                                                                                                                                                                                                                                                                                                                                                                                                                                            | C_umhii_02051_mRNA_2_1    | -                           |   |
| GF004186 | 0                             | 1                         | 1                           | 0    | Hypothetical protein (1)                                                                                                                                                                                                                                                                                                                                                                                                                                                                                                                                               | -                                                                                                                                                                                                                                                                                                              | -                                                                                                                                                                                                                                                                                                                                                                                                                                                                                                                                                                                                            | C_umhii_02050_mRNA_5_1    | -                           |   |
| GF004185 | 0                             | 1                         | 1                           | 0    | Disease resistance protein family, putative (1)                                                                                                                                                                                                                                                                                                                                                                                                                                                                                                                        | -                                                                                                                                                                                                                                                                                                              | -                                                                                                                                                                                                                                                                                                                                                                                                                                                                                                                                                                                                            | C_umhii_02050_mRNA_2_1    | -                           |   |
| GF004184 | 0                             | 1                         | 1                           | 0    | Hypothetical protein (1)                                                                                                                                                                                                                                                                                                                                                                                                                                                                                                                                               | -                                                                                                                                                                                                                                                                                                              | -                                                                                                                                                                                                                                                                                                                                                                                                                                                                                                                                                                                                            | C_umhii_02050_mRNA_1_1    | -                           |   |
| GF004183 | 0                             | 1                         | 1                           | 0    | LRR receptor-like kinase family protein (1)                                                                                                                                                                                                                                                                                                                                                                                                                                                                                                                            | protein phosphorylation [GO:0006468] biological_process (1); protein kinase activity [GO:0004672] molecular_function (1); ATP binding [GO:0005524] molecular_function (1); protein binding [GO:0005515] molecular_function (1)                                                                                 | Protein kinase domain [IPR000719] (1); Concanavalin A-like lectin/glucanase domain [IPR013320] (1); Leucine-rich repeat domain, L domain-like [IPR026751] (1); Protein kinase-like domain [IPR011009] (1); Leucine-rich repeat, typical subtype [IPR003591] (1); Serine/threonine-specificity protein kinase, catalytic domain [IPR002290] (1); Serine/threonine-protein kinase, active site [IPR006271] (1); Protein kinase, ATP binding site [IPR017441] (1); Leucine-rich repeat-containing N-terminal, plant-type [IPR013210] (1); Leucine-rich repeat [IPR006111] (4)                                   | -                         | C_umhii_02049_mRNA_6_1      | - |
| GF004182 | 0                             | 1                         | 1                           | 0    | Hypothetical protein (1)                                                                                                                                                                                                                                                                                                                                                                                                                                                                                                                                               | -                                                                                                                                                                                                                                                                                                              | -                                                                                                                                                                                                                                                                                                                                                                                                                                                                                                                                                                                                            | C_umhii_02049_mRNA_4_1    | -                           |   |
| GF004181 | 0                             | 1                         | 1                           | 0    | Hypothetical protein (1)                                                                                                                                                                                                                                                                                                                                                                                                                                                                                                                                               | -                                                                                                                                                                                                                                                                                                              | -                                                                                                                                                                                                                                                                                                                                                                                                                                                                                                                                                                                                            | C_umhii_02049_mRNA_3_1    | -                           |   |
| GF004180 | 0                             | 1                         | 1                           | 0    | LRR receptor-like kinase family protein (1)                                                                                                                                                                                                                                                                                                                                                                                                                                                                                                                            | protein binding [GO:0005515] molecular_function (1)                                                                                                                                                                                                                                                            | Leucine-rich repeat domain, L domain-like [IPR026751] (1); Leucine-rich repeat [IPR006111] (4)                                                                                                                                                                                                                                                                                                                                                                                                                                                                                                               | -                         | C_umhii_02049_mRNA_1_1      | - |
| GF004179 | 0                             | 1                         | 1                           | 0    | Hypothetical protein (1)                                                                                                                                                                                                                                                                                                                                                                                                                                                                                                                                               | -                                                                                                                                                                                                                                                                                                              | -                                                                                                                                                                                                                                                                                                                                                                                                                                                                                                                                                                                                            | C_umhii_02048_mRNA_3_1    | -                           |   |
| GF004178 | 0                             | 1                         | 1                           | 0    | Hypothetical protein (1)                                                                                                                                                                                                                                                                                                                                                                                                                                                                                                                                               | -                                                                                                                                                                                                                                                                                                              | -                                                                                                                                                                                                                                                                                                                                                                                                                                                                                                                                                                                                            | C_umhii_02048_mRNA_2_1    | -                           |   |
| GF004177 | 0                             | 1                         | 1                           | 0    | Hypothetical protein (1)                                                                                                                                                                                                                                                                                                                                                                                                                                                                                                                                               | -                                                                                                                                                                                                                                                                                                              | -                                                                                                                                                                                                                                                                                                                                                                                                                                                                                                                                                                                                            | C_umhii_02048_mRNA_1_1    | -                           |   |
| GF004176 | 0                             | 1                         | 1                           | 0    | Hypothetical protein (1)                                                                                                                                                                                                                                                                                                                                                                                                                                                                                                                                               | transferase activity, transferring acyl groups other than amino-acyl groups [GO:0016747] molecular_function (1)                                                                                                                                                                                                | Transferase [IPR003480] (1); Chloroplast-specific acetyltransferase-like domain [IPR023213] (1)                                                                                                                                                                                                                                                                                                                                                                                                                                                                                                              | -                         | C_umhii_02047_mRNA_9_1      | - |
| GF004175 | 0                             | 1                         | 1                           | 0    | Hypothetical protein (1)                                                                                                                                                                                                                                                                                                                                                                                                                                                                                                                                               | -                                                                                                                                                                                                                                                                                                              | -                                                                                                                                                                                                                                                                                                                                                                                                                                                                                                                                                                                                            | C_umhii_02046_mRNA_5_1    | -                           |   |
| GF004174 | 0                             | 1                         | 1                           | 0    | Hypothetical protein (1)                                                                                                                                                                                                                                                                                                                                                                                                                                                                                                                                               | -                                                                                                                                                                                                                                                                                                              | -                                                                                                                                                                                                                                                                                                                                                                                                                                                                                                                                                                                                            | C_umhii_02046_mRNA_4_1    | -                           |   |
| GF004173 | 0                             | 1                         | 1                           | 0    | Hypothetical protein (1)                                                                                                                                                                                                                                                                                                                                                                                                                                                                                                                                               | -                                                                                                                                                                                                                                                                                                              | -                                                                                                                                                                                                                                                                                                                                                                                                                                                                                                                                                                                                            | C_umhii_02046_mRNA_2_1    | -                           |   |
| GF004172 | 0                             | 1                         | 1                           | 0    | Hypothetical protein (1)                                                                                                                                                                                                                                                                                                                                                                                                                                                                                                                                               | -                                                                                                                                                                                                                                                                                                              | -                                                                                                                                                                                                                                                                                                                                                                                                                                                                                                                                                                                                            | C_umhii_02045_mRNA_2_1    | -                           |   |
| GF004171 | 0                             | 1                         | 1                           | 0    | Hypothetical protein (1)                                                                                                                                                                                                                                                                                                                                                                                                                                                                                                                                               | -                                                                                                                                                                                                                                                                                                              | -                                                                                                                                                                                                                                                                                                                                                                                                                                                                                                                                                                                                            | C_umhii_02044_mRNA_4_1    | -                           |   |
| GF004170 | 0                             | 1                         | 1                           | 0    | Hypothetical protein (1)                                                                                                                                                                                                                                                                                                                                                                                                                                                                                                                                               | -                                                                                                                                                                                                                                                                                                              | -                                                                                                                                                                                                                                                                                                                                                                                                                                                                                                                                                                                                            | C_umhii_02044_mRNA_1_1    | -                           |   |
| GF004169 | 0                             | 1                         | 1                           | 0    | Cc-sbs-1r resistance protein, putative isoform 2 (1)                                                                                                                                                                                                                                                                                                                                                                                                                                                                                                                   | ADP binding [GO:0043531] molecular_function (1)                                                                                                                                                                                                                                                                | Leucine-rich repeat domain, L domain-like [IPR026751] (1); NB-ARC [IPR002182] (1); P-loop containing nucleoside triphosphate hydrolase [IPR027417] (4)                                                                                                                                                                                                                                                                                                                                                                                                                                                       | -                         | C_umhii_02043_mRNA_5_1      | - |
| GF004168 | 0                             | 1                         | 1                           | 0    | Hypothetical protein (1)                                                                                                                                                                                                                                                                                                                                                                                                                                                                                                                                               | -                                                                                                                                                                                                                                                                                                              | -                                                                                                                                                                                                                                                                                                                                                                                                                                                                                                                                                                                                            | C_umhii_02042_mRNA_2_1    | -                           |   |
| GF004167 | 0                             | 1                         | 1                           | 0    | Hypothetical protein (1)                                                                                                                                                                                                                                                                                                                                                                                                                                                                                                                                               | -                                                                                                                                                                                                                                                                                                              | -                                                                                                                                                                                                                                                                                                                                                                                                                                                                                                                                                                                                            | C_umhii_02042_mRNA_1_1    | -                           |   |
| GF004166 | 0                             | 1                         | 1                           | 0    | AT1G32200 protein (1)                                                                                                                                                                                                                                                                                                                                                                                                                                                                                                                                                  | -                                                                                                                                                                                                                                                                                                              | -                                                                                                                                                                                                                                                                                                                                                                                                                                                                                                                                                                                                            | C_umhii_02041_mRNA_5_1    | -                           |   |
| GF004165 | 0                             | 1                         | 1                           | 0    | Hypothetical protein (1)                                                                                                                                                                                                                                                                                                                                                                                                                                                                                                                                               | small GTPase mediated signal transduction [GO:0007264] biological_process (1); GTP binding [GO:0005525] molecular_function (1); protein transport [GO:0015031] biological_process (1)                                                                                                                          | Small GTPase superfamily, Rab-type [IPR003570] (1); Small GTPase superfamily [IPR001806] (1); P-loop containing nucleoside triphosphate hydrolase [IPR027417] (4)                                                                                                                                                                                                                                                                                                                                                                                                                                            | -                         | C_umhii_02040_mRNA_5_1      | - |
| GF004164 | 0                             | 1                         | 1                           | 0    | Disease resistance protein (1)                                                                                                                                                                                                                                                                                                                                                                                                                                                                                                                                         | -                                                                                                                                                                                                                                                                                                              | -                                                                                                                                                                                                                                                                                                                                                                                                                                                                                                                                                                                                            | C_umhii_02040_mRNA_2_1    | -                           |   |
| GF004163 | 0                             | 1                         | 1                           | 0    | Hypothetical protein (1)                                                                                                                                                                                                                                                                                                                                                                                                                                                                                                                                               | small GTPase mediated signal transduction [GO:0007264] biological_process (1); GTP binding [GO:0005525] molecular_function (1); terpenoid synthase activity [GO:0010333] molecular_function (1); lyase activity [GO:0016829] molecular_function (1); magnesium ion binding [GO:0000267] molecular_function (1) | Leucine-rich repeat domain, L domain-like [IPR026751] (1); P-loop containing nucleoside triphosphate hydrolase [IPR027417] (4); Small GTPase superfamily [IPR001806] (1)                                                                                                                                                                                                                                                                                                                                                                                                                                     | -                         | C_umhii_02040_mRNA_1_1      | - |
| GF004162 | 0                             | 1                         | 1                           | 0    | Scquiterpene synthase (1)                                                                                                                                                                                                                                                                                                                                                                                                                                                                                                                                              | terpenoid synthase activity [GO:0010333] molecular_function (1); lyase activity [GO:0016829] molecular_function (1); magnesium ion binding [GO:0000267] molecular_function (1)                                                                                                                                 | Terpene synthase, metal-binding domain [IPR005630] (1); Isoprenoid synthase domain [IPR008949] (1)                                                                                                                                                                                                                                                                                                                                                                                                                                                                                                           | -                         | C_umhii_02039_mRNA_1_1      | - |
| GF004161 | 0                             | 1                         | 1                           | 0    | Hypothetical protein (1)                                                                                                                                                                                                                                                                                                                                                                                                                                                                                                                                               | -                                                                                                                                                                                                                                                                                                              | -                                                                                                                                                                                                                                                                                                                                                                                                                                                                                                                                                                                                            | C_umhii_02037_mRNA_4_1    | -                           |   |
| GF004160 | 0                             | 1                         | 1                           | 0    | Disease resistance protein (CC-NBS-LRR class) family protein (1)                                                                                                                                                                                                                                                                                                                                                                                                                                                                                                       | ADP binding [GO:0043531] molecular_function (1)                                                                                                                                                                                                                                                                | NB-ARC [IPR02182] (1); P-loop containing nucleoside triphosphate hydrolase [IPR027417] (4); Leucine-rich repeat domain, L domain-like [IPR026751] (1)                                                                                                                                                                                                                                                                                                                                                                                                                                                        | -                         | C_umhii_02036_mRNA_3_1      | - |
| GF004159 | 0                             | 1                         | 1                           | 0    | Hypothetical protein (1)                                                                                                                                                                                                                                                                                                                                                                                                                                                                                                                                               | -                                                                                                                                                                                                                                                                                                              | -                                                                                                                                                                                                                                                                                                                                                                                                                                                                                                                                                                                                            | C_umhii_02034_mRNA_1_1    | -                           |   |
| GF004158 | 0                             | 1                         | 1                           | 0    | Hypothetical protein (1)                                                                                                                                                                                                                                                                                                                                                                                                                                                                                                                                               | -                                                                                                                                                                                                                                                                                                              | -                                                                                                                                                                                                                                                                                                                                                                                                                                                                                                                                                                                                            | C_umhii_02033_mRNA_2_1    | -                           |   |



| ID        | Num. in C. crottenstei | Num. in C. caudis | Num. in P. putida | Note | GO                                                  | InterPro                                                                                                                                                                                                                                                                                                                                           | Members in C. crottenstei                                                                                                                                                                                                                                                                                    | Members in C. caudis     | Members in P. putida |
|-----------|------------------------|-------------------|-------------------|------|-----------------------------------------------------|----------------------------------------------------------------------------------------------------------------------------------------------------------------------------------------------------------------------------------------------------------------------------------------------------------------------------------------------------|--------------------------------------------------------------------------------------------------------------------------------------------------------------------------------------------------------------------------------------------------------------------------------------------------------------|--------------------------|----------------------|
| GF0042157 | 0                      | 1                 | 1                 | 0    | Wall-associated receptor Kinase 5 (1)               | protein kinase activity [GO:0004672 molecular_function] (1); protein phosphorylation [GO:0006468 biological_process] (1); ATP binding [GO:0005524 molecular_function] (1)                                                                                                                                                                          | Protein kinase-like domain [IPR011009] (1); Protein kinase domain [IPR00719] (1); Serine-threonine/tyrosine-protein kinase catalytic domain [IPR01245] (1); Serine-threonine/tyrosine-protein kinase, active site [IPR00871] (1); Serine-threonine/tyrosine-protein kinase, catalytic domain [IPR002290] (1) | C_umshii_02030_mRNA_1.1  | -                    |
| GF0042156 | 0                      | 1                 | 1                 | 0    | Hypothetical protein (1)                            | -                                                                                                                                                                                                                                                                                                                                                  | -                                                                                                                                                                                                                                                                                                            | C_umshii_02030_mRNA_5.1  | -                    |
| GF0042155 | 0                      | 1                 | 1                 | 0    | Hypothetical protein (1)                            | -                                                                                                                                                                                                                                                                                                                                                  | -                                                                                                                                                                                                                                                                                                            | C_umshii_02030_mRNA_2.1  | -                    |
| GF0042154 | 0                      | 1                 | 1                 | 0    | Hypothetical protein (1)                            | protein binding [GO:0005515 molecular_function] (1)                                                                                                                                                                                                                                                                                                | Tetrapeptide-like helical domain [IPR011990] (4)                                                                                                                                                                                                                                                             | C_umshii_02029_mRNA_5.1  | -                    |
| GF0042153 | 0                      | 1                 | 1                 | 0    | Hypothetical protein (1)                            | -                                                                                                                                                                                                                                                                                                                                                  | -                                                                                                                                                                                                                                                                                                            | C_umshii_02029_mRNA_2.1  | -                    |
| GF0042152 | 0                      | 1                 | 1                 | 0    | Cactus-binding carboxy-terminal, cactin protein (1) | protein binding [GO:0005515 molecular_function] (1)                                                                                                                                                                                                                                                                                                | Cactin, central domain [IPR018816] (1); Cactin, C-terminal [IPR019134] (1)                                                                                                                                                                                                                                   | C_umshii_02027_mRNA_4.1  | -                    |
| GF0042151 | 0                      | 1                 | 1                 | 0    | Hypothetical protein (1)                            | -                                                                                                                                                                                                                                                                                                                                                  | -                                                                                                                                                                                                                                                                                                            | C_umshii_02026_mRNA_6.1  | -                    |
| GF0042150 | 0                      | 1                 | 1                 | 0    | Hypothetical protein (1)                            | protein kinase activity [GO:0004672 molecular_function] (1); protein phosphorylation [GO:0006468 biological_process] (1); ATP binding [GO:0005524 molecular_function] (1)                                                                                                                                                                          | Protein kinase, ATP binding site [IPR017441] (1); Serine-threonine/tyrosine-protein kinase catalytic domain [IPR00719] (1); Protein kinase-like domain [IPR011009] (1)                                                                                                                                       | C_umshii_02023_mRNA_4.1  | -                    |
| GF0042149 | 0                      | 1                 | 1                 | 0    | Hypothetical protein (1)                            | -                                                                                                                                                                                                                                                                                                                                                  | -                                                                                                                                                                                                                                                                                                            | C_umshii_02023_mRNA_1.1  | -                    |
| GF0042148 | 0                      | 1                 | 1                 | 0    | Hypothetical protein (1)                            | metabolic process [GO:0008152 biological_process] (1); membrane [GO:0016020 cellular_component] (1); fatty acid biosynthetic process [GO:0006633 biological_process] (1); transference activity, transferring acyl groups other than amino-acyl groups [GO:0016747 molecular_function] (1); catalytic activity [GO:0003824 molecular_function] (1) | Very-long-chain 3-ketoacyl-CoA synthase [IPR012392] (1); Thioester-like [IPR016109] (1); FAL175/pe III polypeptide synthase-like protein [IPR013611] (4)                                                                                                                                                     | C_umshii_02022_mRNA_5.1  | -                    |
| GF0042147 | 0                      | 1                 | 1                 | 0    | Hypothetical protein (1)                            | nucleic acid binding [GO:0003676 molecular_function] (1); protein dimerization activity [GO:0046983 molecular_function] (1)                                                                                                                                                                                                                        | HAT, C-terminal dimerization domain [IPR008906] (1); Ribonuclease H-like domain [IPR012337] (1)                                                                                                                                                                                                              | C_umshii_02022_mRNA_3.1  | -                    |
| GF0042146 | 0                      | 1                 | 1                 | 0    | Hypothetical protein (1)                            | -                                                                                                                                                                                                                                                                                                                                                  | -                                                                                                                                                                                                                                                                                                            | C_umshii_02021_mRNA_3.1  | -                    |
| GF0042145 | 0                      | 1                 | 1                 | 0    | Hypothetical protein (1)                            | double-stranded RNA binding [GO:0003725 molecular_function] (1)                                                                                                                                                                                                                                                                                    | DHBP synthase R88-like alpha/beta domain [IPR017945] (1)                                                                                                                                                                                                                                                     | C_umshii_02021_mRNA_11.1 | -                    |
| GF0042144 | 0                      | 1                 | 1                 | 0    | Hypothetical protein (1)                            | -                                                                                                                                                                                                                                                                                                                                                  | -                                                                                                                                                                                                                                                                                                            | C_umshii_02021_mRNA_1.1  | -                    |
| GF0042143 | 0                      | 1                 | 1                 | 0    | Hypothetical protein (1)                            | -                                                                                                                                                                                                                                                                                                                                                  | -                                                                                                                                                                                                                                                                                                            | C_umshii_02020_mRNA_1.1  | -                    |
| GF0042142 | 0                      | 1                 | 1                 | 0    | Hypothetical protein (1)                            | U2AF [GO:0099701 cellular_component] (1); metal ion binding [GO:0046872 molecular_function] (1); RNA binding [GO:0003732 molecular_function] (1); mRNA splicing, via spliceosome [GO:0000598 biological_process] (1)                                                                                                                               | Alpha/Beta hydrolase fold [IPR029058] (1); U2 auxiliary factor small subunit [IPR009145] (1); Winged helix-turn-helix DNA-binding domain [IPR011991] (1); Zinc finger, CCCC-type [IPR008571] (4)                                                                                                             | C_umshii_02019_mRNA_1.1  | -                    |
| GF0042141 | 0                      | 1                 | 1                 | 0    | Hypothetical protein (1)                            | -                                                                                                                                                                                                                                                                                                                                                  | -                                                                                                                                                                                                                                                                                                            | C_umshii_02018_mRNA_2.1  | -                    |
| GF0042140 | 0                      | 1                 | 1                 | 0    | Putative potassium transporter 13 (1)               | potassium ion transmembrane transporter activity [GO:0015079 molecular_function] (1); potassium ion transmembrane transport [GO:0071805 biological_process] (1); membrane [GO:0016020 cellular_component] (1)                                                                                                                                      | Potassium transporter [IPR003855] (1)                                                                                                                                                                                                                                                                        | C_umshii_02017_mRNA_1.1  | -                    |
| GF0042139 | 0                      | 1                 | 1                 | 0    | Hypothetical protein (1)                            | ubiquitin-dependent protein catabolic process [GO:0006511 biological_process] (1); multicellular organismal development [GO:0007279 biological_process] (1); nucleus [GO:0005634 cellular_component] (1)                                                                                                                                           | E3 ubiquitin-protein ligase SIN-like [IPR016162] (1)                                                                                                                                                                                                                                                         | C_umshii_02016_mRNA_3.1  | -                    |
| GF0042138 | 0                      | 1                 | 1                 | 0    | Hypothetical protein (1)                            | oxidation-reduction process [GO:0004990 molecular_function] (1); de novo pyrimidine nucleobase biosynthetic process [GO:0006207 biological_process] (1); catalytic activity [GO:0003824 molecular_function] (1); metabolic process [GO:0008152 biological_process] (1)                                                                             | Ribonucleic phosphate binding barrel [IPR011601] (1); Oxidoreductase 5-phosphate decarboxylase domain [IPR007154] (1); Aldolase-type TDM barrel [IPR015785] (1)                                                                                                                                              | C_umshii_02016_mRNA_2.1  | -                    |
| GF0042137 | 0                      | 1                 | 1                 | 0    | Hypothetical protein (1)                            | -                                                                                                                                                                                                                                                                                                                                                  | -                                                                                                                                                                                                                                                                                                            | C_umshii_02016_mRNA_1.1  | -                    |
| GF0042136 | 0                      | 1                 | 1                 | 0    | Hypothetical protein (1)                            | -                                                                                                                                                                                                                                                                                                                                                  | -                                                                                                                                                                                                                                                                                                            | C_umshii_02015_mRNA_4.1  | -                    |
| GF0042135 | 0                      | 1                 | 1                 | 0    | Hypothetical protein (1)                            | -                                                                                                                                                                                                                                                                                                                                                  | -                                                                                                                                                                                                                                                                                                            | C_umshii_02015_mRNA_3.1  | -                    |
| GF0042134 | 0                      | 1                 | 1                 | 0    | Hypothetical protein (1)                            | -                                                                                                                                                                                                                                                                                                                                                  | -                                                                                                                                                                                                                                                                                                            | C_umshii_02015_mRNA_1.1  | -                    |
| GF0042133 | 0                      | 1                 | 1                 | 0    | Hypothetical protein (1)                            | nucleic acid binding [GO:0003676 molecular_function] (1); zinc ion binding [GO:0008270 molecular_function] (1)                                                                                                                                                                                                                                     | Zinc finger, CCHC-type [IPR001878] (4)                                                                                                                                                                                                                                                                       | C_umshii_02014_mRNA_3.1  | -                    |
| GF0042132 | 0                      | 1                 | 1                 | 0    | Hypothetical protein (1)                            | -                                                                                                                                                                                                                                                                                                                                                  | -                                                                                                                                                                                                                                                                                                            | C_umshii_02014_mRNA_1.1  | -                    |
| GF0042131 | 0                      | 1                 | 1                 | 0    | Zinc finger containing protein, putative (1)        | zinc ion binding [GO:0008270 molecular_function] (1); nucleic acid binding [GO:0003676 molecular_function] (1)                                                                                                                                                                                                                                     | Zinc finger, CCHC-type [IPR001878] (1); Zinc finger, FMZ-type [IPR006564] (1); Zinc finger, SWIM-type [IPR007527] (1)                                                                                                                                                                                        | C_umshii_02013_mRNA_5.1  | -                    |
| GF0042130 | 0                      | 1                 | 1                 | 0    | Mads box protein, putative (1)                      | DNA binding [GO:0003677 molecular_function] (1); protein dimerization activity [GO:0046983 molecular_function] (1)                                                                                                                                                                                                                                 | Transcription factor, MADS-box [IPR002100] (1)                                                                                                                                                                                                                                                               | C_umshii_02013_mRNA_1.1  | -                    |
| GF0042129 | 0                      | 1                 | 1                 | 0    | Hypothetical protein (1)                            | -                                                                                                                                                                                                                                                                                                                                                  | -                                                                                                                                                                                                                                                                                                            | C_umshii_02012_mRNA_2.1  | -                    |
| GF0042128 | 0                      | 1                 | 1                 | 0    | Hypothetical protein (1)                            | nucleic acid binding [GO:0003676 molecular_function] (1)                                                                                                                                                                                                                                                                                           | Ribonuclease H-like domain [IPR012337] (1)                                                                                                                                                                                                                                                                   | C_umshii_02011_mRNA_6.1  | -                    |
| GF0042127 | 0                      | 1                 | 1                 | 0    | Histone deacetylase 15 (1)                          | -                                                                                                                                                                                                                                                                                                                                                  | -                                                                                                                                                                                                                                                                                                            | C_umshii_02011_mRNA_5.1  | -                    |
| GF0042126 | 0                      | 1                 | 1                 | 0    | Hypothetical protein (1)                            | -                                                                                                                                                                                                                                                                                                                                                  | -                                                                                                                                                                                                                                                                                                            | C_umshii_02010_mRNA_2.1  | -                    |
| GF0042125 | 0                      | 1                 | 1                 | 0    | Hypothetical protein (1)                            | -                                                                                                                                                                                                                                                                                                                                                  | -                                                                                                                                                                                                                                                                                                            | C_umshii_02008_mRNA_1.1  | -                    |
| GF0042124 | 0                      | 1                 | 1                 | 0    | Hypothetical protein (1)                            | -                                                                                                                                                                                                                                                                                                                                                  | -                                                                                                                                                                                                                                                                                                            | C_umshii_02007_mRNA_5.1  | -                    |
| GF0042123 | 0                      | 1                 | 1                 | 0    | Hypothetical protein (1)                            | -                                                                                                                                                                                                                                                                                                                                                  | -                                                                                                                                                                                                                                                                                                            | C_umshii_02007_mRNA_3.1  | -                    |
| GF0042122 | 0                      | 1                 | 1                 | 0    | Hypothetical protein (1)                            | -                                                                                                                                                                                                                                                                                                                                                  | -                                                                                                                                                                                                                                                                                                            | C_umshii_02007_mRNA_1.1  | -                    |
| GF0042121 | 0                      | 1                 | 1                 | 0    | Hypothetical protein (1)                            | Piccolo NuA4 histone acetyltransferase complex [GO:0032777 cellular_component] (1); regulation of transcription from RNA polymerase II promoter [GO:0006357 biological_process] (1); NuA4 histone acetyltransferase complex [GO:0032267 cellular_component] (1)                                                                                    | Enhancer of polycomb protein [IPR028481] (1)                                                                                                                                                                                                                                                                 | C_umshii_02003_mRNA_4.1  | -                    |
| GF0042120 | 0                      | 1                 | 1                 | 0    | Hypothetical protein (1)                            | transcription release factor activity [GO:0003747 molecular_function] (1); translational termination [GO:0006415 biological_process] (1)                                                                                                                                                                                                           | Double-stranded RNA-binding domain [IPR014701] (1); MULE transposase domain [IPR00539] (1); Peptide chain release factor class I class II [IPR000352] (1)                                                                                                                                                    | C_umshii_02003_mRNA_2.1  | -                    |
| GF0042119 | 0                      | 1                 | 1                 | 0    | Hypothetical protein (1)                            | -                                                                                                                                                                                                                                                                                                                                                  | -                                                                                                                                                                                                                                                                                                            | C_umshii_02003_mRNA_1.1  | -                    |
| GF0042118 | 0                      | 1                 | 1                 | 0    | Hypothetical protein (1)                            | -                                                                                                                                                                                                                                                                                                                                                  | -                                                                                                                                                                                                                                                                                                            | C_umshii_02002_mRNA_2.1  | -                    |
| GF0042117 | 0                      | 1                 | 1                 | 0    | Hypothetical protein (1)                            | -                                                                                                                                                                                                                                                                                                                                                  | -                                                                                                                                                                                                                                                                                                            | C_umshii_02001_mRNA_4.1  | -                    |
| GF0042116 | 0                      | 1                 | 1                 | 0    | Hypothetical protein (1)                            | -                                                                                                                                                                                                                                                                                                                                                  | -                                                                                                                                                                                                                                                                                                            | C_umshii_02001_mRNA_1.1  | -                    |
| GF0042115 | 0                      | 1                 | 1                 | 0    | Hypothetical protein (1)                            | -                                                                                                                                                                                                                                                                                                                                                  | -                                                                                                                                                                                                                                                                                                            | C_umshii_02000_mRNA_1.1  | -                    |
| GF0042114 | 0                      | 1                 | 1                 | 0    | Hypothetical protein (1)                            | carbohydrate metabolic process [GO:0005979 biological_process] (1); nucleic acid binding [GO:0003676 molecular_function] (1)                                                                                                                                                                                                                       | Ribonuclease H-like domain [IPR012337] (1); Glycosyl-hydrolase, amylase domain [IPR013781] (1); Chitinase insertion domain [IPR029070] (1)                                                                                                                                                                   | C_umshii_01999_mRNA_4.1  | -                    |
| GF0042113 | 0                      | 1                 | 1                 | 0    | Hypothetical protein (1)                            | -                                                                                                                                                                                                                                                                                                                                                  | -                                                                                                                                                                                                                                                                                                            | C_umshii_01999_mRNA_3.1  | -                    |
| GF0042112 | 0                      | 1                 | 1                 | 0    | Hypothetical protein (1)                            | -                                                                                                                                                                                                                                                                                                                                                  | -                                                                                                                                                                                                                                                                                                            | C_umshii_01999_mRNA_2.1  | -                    |
| GF0042111 | 0                      | 1                 | 1                 | 0    | Hypothetical protein (1)                            | -                                                                                                                                                                                                                                                                                                                                                  | -                                                                                                                                                                                                                                                                                                            | C_umshii_01999_mRNA_1.1  | -                    |
| GF0042110 | 0                      | 1                 | 1                 | 0    | Hypothetical protein (1)                            | -                                                                                                                                                                                                                                                                                                                                                  | -                                                                                                                                                                                                                                                                                                            | C_umshii_01998_mRNA_3.1  | -                    |
| GF0042109 | 0                      | 1                 | 1                 | 0    | Hypothetical protein (1)                            | serine-type carboxypeptidase activity [GO:0004184 molecular_function] (1); proteolysis [GO:0006508 biological_process] (1)                                                                                                                                                                                                                         | Peptidase S10, serine carboxypeptidase [IPR001563] (1); Alpha/Beta hydrolase fold [IPR000808] (1)                                                                                                                                                                                                            | C_umshii_01997_mRNA_1.1  | -                    |
| GF0042108 | 0                      | 1                 | 1                 | 0    | Hypothetical protein (1)                            | -                                                                                                                                                                                                                                                                                                                                                  | -                                                                                                                                                                                                                                                                                                            | C_umshii_01994_mRNA_6.1  | -                    |
| GF0042107 | 0                      | 1                 | 1                 | 0    | Hypothetical protein (1)                            | -                                                                                                                                                                                                                                                                                                                                                  | -                                                                                                                                                                                                                                                                                                            | C_umshii_01994_mRNA_1.1  | -                    |
| GF0042106 | 0                      | 1                 | 1                 | 0    | Putative disease resistance protein RGA1 (1)        | ADP binding [GO:0043531 molecular_function] (1)                                                                                                                                                                                                                                                                                                    | P-loop containing nucleoside triphosphate hydrolase [IPR017417] (1); NB-ABC [IPR021812] (1)                                                                                                                                                                                                                  | C_umshii_01993_mRNA_6.1  | -                    |
| GF0042105 | 0                      | 1                 | 1                 | 0    | Hypothetical protein (1)                            | -                                                                                                                                                                                                                                                                                                                                                  | -                                                                                                                                                                                                                                                                                                            | C_umshii_01993_mRNA_5.1  | -                    |
| GF0042104 | 0                      | 1                 | 1                 | 0    | Hypothetical protein (1)                            | zinc ion binding [GO:0008270 molecular_function] (1)                                                                                                                                                                                                                                                                                               | Zinc finger, FMZ-type [IPR006564] (1); Zinc finger, SWIM-type [IPR007527] (1)                                                                                                                                                                                                                                | C_umshii_01993_mRNA_1.1  | -                    |
| GF0042103 | 0                      | 1                 | 1                 | 0    | Hypothetical protein (1)                            | -                                                                                                                                                                                                                                                                                                                                                  | -                                                                                                                                                                                                                                                                                                            | C_umshii_01992_mRNA_2.1  | -                    |
| GF0042102 | 0                      | 1                 | 1                 | 0    | Cytochrome P450 76C4 (1)                            | oxidation-reduction process [GO:0055114 biological_process] (1); oxidoreductase activity, acting on paired donors, with incorporation or reduction of molecular oxygen [GO:0016765 molecular_function] (1); heme binding [GO:0020817 molecular_function] (1); iron ion binding [GO:0005506 molecular_function] (1)                                 | Cytochrome P450 [IPR001128] (1); Cytochrome P450, E-class, group I [IPR002401] (1); Cytochrome P450, conserved site [IPR017972] (1)                                                                                                                                                                          | C_umshii_01991_mRNA_4.1  | -                    |
| GF0042101 | 0                      | 1                 | 1                 | 0    | Hypothetical protein (1)                            | -                                                                                                                                                                                                                                                                                                                                                  | -                                                                                                                                                                                                                                                                                                            | C_umshii_01991_mRNA_3.1  | -                    |

| ID        | Num. in C. ebraeensis | Num. in C. auris | Num. in P. putida | Note                                                                   | GO                                                                                                                                                                                                                                   | InterPro                                                                                                                                                                                                                                                                                                                                                                                                                                                                                 | Members in C. ebraeensis | Members in C. auris   | Members in P. putida |
|-----------|-----------------------|------------------|-------------------|------------------------------------------------------------------------|--------------------------------------------------------------------------------------------------------------------------------------------------------------------------------------------------------------------------------------|------------------------------------------------------------------------------------------------------------------------------------------------------------------------------------------------------------------------------------------------------------------------------------------------------------------------------------------------------------------------------------------------------------------------------------------------------------------------------------------|--------------------------|-----------------------|----------------------|
| GF0042100 | 0                     | 1                | 1                 | G-type lectin 6-receptor-like serine/threonine-protein kinase (1)      | ATP binding [GO:0005524 molecular_function] (1); protein kinase activity [GO:0004672 molecular_function] (1); protein phosphorylation [GO:0006468 biological_process] (1); recognition of pollex [GO:0048544 biological_process] (1) | S-locus glycoprotein domain [IPR000858] (1); Serine/threonine dual specificity protein kinase catalytic domain [IPR02290] (1); Serine/threonine-protein kinase, active site [IPR008271] (1); Serine/threonine-protein kinase catalytic domain [IPR01245] (1); PAN/Agglutinin domain [IPR03505] (1); Bulb-type lectin domain [IPR01480] (1); Protein kinase domain [IPR000719] (1); Concavulin A-like lectin/glycanase domain [IPR013320] (1); Protein kinase-like domain [IPR011099] (1) | -                        | C_uni91_0191_mRNA_2.1 | -                    |
| GF0042099 | 0                     | 1                | 1                 | 0 Hypothetical protein (1)                                             |                                                                                                                                                                                                                                      |                                                                                                                                                                                                                                                                                                                                                                                                                                                                                          | -                        | C_uni91_0191_mRNA_1.1 | -                    |
| GF0042098 | 0                     | 1                | 1                 | 0 Hypothetical protein (1)                                             |                                                                                                                                                                                                                                      |                                                                                                                                                                                                                                                                                                                                                                                                                                                                                          | -                        | C_uni91_0189_mRNA_3.1 | -                    |
| GF0042097 | 0                     | 1                | 1                 | 0 MadR family transposase isoform 1 (1)                                |                                                                                                                                                                                                                                      | MULE transposase domain [IPR018289] (1); Transposase, MuDR, plant [IPR004322] (1)                                                                                                                                                                                                                                                                                                                                                                                                        | -                        | C_uni91_0187_mRNA_5.1 | -                    |
| GF0042096 | 0                     | 1                | 1                 | 0 Hypothetical protein (1)                                             |                                                                                                                                                                                                                                      | HAD-like domain [IPR013214] (1); FCP1 homology domain [IPR04274] (1)                                                                                                                                                                                                                                                                                                                                                                                                                     | -                        | C_uni91_0187_mRNA_4.1 | -                    |
| GF0042095 | 0                     | 1                | 1                 | 0 Hypothetical protein (1)                                             | ribosome [GO:0005840 cellular_component] (1); translation [GO:0006412 biological_process] (1); structural constituent of ribosome [GO:0003735 molecular_function] (1)                                                                | Ribosomal protein S8 [IPR000630] (1)                                                                                                                                                                                                                                                                                                                                                                                                                                                     | -                        | C_uni91_0187_mRNA_1.1 | -                    |
| GF0042094 | 0                     | 1                | 1                 | 0 Hypothetical protein (1)                                             |                                                                                                                                                                                                                                      |                                                                                                                                                                                                                                                                                                                                                                                                                                                                                          | -                        | C_uni91_0186_mRNA_4.1 | -                    |
| GF0042093 | 0                     | 1                | 1                 | 0 Hypothetical protein (1)                                             |                                                                                                                                                                                                                                      |                                                                                                                                                                                                                                                                                                                                                                                                                                                                                          | -                        | C_uni91_0186_mRNA_3.1 | -                    |
| GF0042092 | 0                     | 1                | 1                 | 0 Hypothetical protein (1)                                             | nucleic acid binding [GO:0003676 molecular_function] (1); zinc ion binding [GO:0008270 molecular_function] (1)                                                                                                                       | Zinc finger, CCHC-type [IPR011878] (1)                                                                                                                                                                                                                                                                                                                                                                                                                                                   | -                        | C_uni91_0186_mRNA_2.1 | -                    |
| GF0042091 | 0                     | 1                | 1                 | 0 Hypothetical protein (1)                                             | nucleic acid binding [GO:0003676 molecular_function] (1)                                                                                                                                                                             | Ribonuclease H-like domain [IPR012337] (1)                                                                                                                                                                                                                                                                                                                                                                                                                                               | -                        | C_uni91_0185_mRNA_3.1 | -                    |
| GF0042090 | 0                     | 1                | 1                 | 0 Hypothetical protein (1)                                             |                                                                                                                                                                                                                                      |                                                                                                                                                                                                                                                                                                                                                                                                                                                                                          | -                        | C_uni91_0185_mRNA_2.1 | -                    |
| GF0042089 | 0                     | 1                | 1                 | 0 Hypothetical protein (1)                                             |                                                                                                                                                                                                                                      | 107M putative phosphate transporter, cytosolic domain [IPR027815] (1); Calcium permeable stress-gated cation channel 1, N-terminal transmembrane domain [IPR02880] (1)                                                                                                                                                                                                                                                                                                                   | -                        | C_uni91_0184_mRNA_5.1 | -                    |
| GF0042088 | 0                     | 1                | 1                 | 0 Hypothetical protein (1)                                             | oxidation-reduction process [GO:0005114 biological_process] (1); glutathione peroxidase activity [GO:0004602 molecular_function] (1); response to oxidative stress [GO:0006979 biological_process] (1)                               | Glutathione peroxidase conserved site [IPR029705] (1); Glutathione peroxidase [IPR00889] (1); Thoredoxin-like fold [IPR012336] (1); Glutathione peroxidase active site [IPR029705] (1); PWWP domain [IPR00013] (1)                                                                                                                                                                                                                                                                       | -                        | C_uni91_0184_mRNA_1.1 | -                    |
| GF0042087 | 0                     | 1                | 1                 | 0 Hypothetical protein (1)                                             |                                                                                                                                                                                                                                      |                                                                                                                                                                                                                                                                                                                                                                                                                                                                                          | -                        | C_uni91_0183_mRNA_5.1 | -                    |
| GF0042086 | 0                     | 1                | 1                 | 0 Hypothetical protein (1)                                             |                                                                                                                                                                                                                                      |                                                                                                                                                                                                                                                                                                                                                                                                                                                                                          | -                        | C_uni91_0183_mRNA_4.1 | -                    |
| GF0042085 | 0                     | 1                | 1                 | 0 S/G-Sr and S/G-A-Sr genes and Mch2orf10 retrotransposon sequence (1) |                                                                                                                                                                                                                                      |                                                                                                                                                                                                                                                                                                                                                                                                                                                                                          | -                        | C_uni91_0183_mRNA_3.1 | -                    |
| GF0042084 | 0                     | 1                | 1                 | 0 Hypothetical protein (1)                                             |                                                                                                                                                                                                                                      |                                                                                                                                                                                                                                                                                                                                                                                                                                                                                          | -                        | C_uni91_0182_mRNA_8.1 | -                    |
| GF0042083 | 0                     | 1                | 1                 | 0 Hypothetical protein (1)                                             |                                                                                                                                                                                                                                      |                                                                                                                                                                                                                                                                                                                                                                                                                                                                                          | -                        | C_uni91_0182_mRNA_6.1 | -                    |
| GF0042082 | 0                     | 1                | 1                 | 0 Amidophosphoribosyltransferase (1)                                   | nucleoside metabolic process [GO:0009116 biological_process] (1)                                                                                                                                                                     | Phosphoribosyltransferase-like [IPR029057] (1); Phosphoribosyltransferase domain [IPR008361] (1)                                                                                                                                                                                                                                                                                                                                                                                         | -                        | C_uni91_0182_mRNA_5.1 | -                    |
| GF0042081 | 0                     | 1                | 1                 | 0 Hypothetical protein (1)                                             |                                                                                                                                                                                                                                      | Phosphoribosyltransferase-like [IPR029057] (1)                                                                                                                                                                                                                                                                                                                                                                                                                                           | -                        | C_uni91_0182_mRNA_4.1 | -                    |
| GF0042080 | 0                     | 1                | 1                 | 0 Tnl1 non-LTR retroelement protein-like (1)                           |                                                                                                                                                                                                                                      | Zinc knase CXXC4HXG [IPR025836] (1); Domain of unknown function DUF4282 [IPR025158] (1); Endonuclease/exonuclease/phosphatase [IPR00135] (1)                                                                                                                                                                                                                                                                                                                                             | -                        | C_uni91_0182_mRNA_3.1 | -                    |
| GF0042079 | 0                     | 1                | 1                 | 0 Hypothetical protein (1)                                             |                                                                                                                                                                                                                                      | Reverse transcriptase zinc-binding domain [IPR026960] (1)                                                                                                                                                                                                                                                                                                                                                                                                                                | -                        | C_uni91_0182_mRNA_2.1 | -                    |
| GF0042078 | 0                     | 1                | 1                 | 0 Hypothetical protein (1)                                             |                                                                                                                                                                                                                                      |                                                                                                                                                                                                                                                                                                                                                                                                                                                                                          | -                        | C_uni91_0182_mRNA_1.1 | -                    |
| GF0042077 | 0                     | 1                | 1                 | 0 Hypothetical protein (1)                                             |                                                                                                                                                                                                                                      |                                                                                                                                                                                                                                                                                                                                                                                                                                                                                          | -                        | C_uni91_0181_mRNA_1.1 | -                    |
| GF0042076 | 0                     | 1                | 1                 | 0 Hypothetical protein (1)                                             |                                                                                                                                                                                                                                      |                                                                                                                                                                                                                                                                                                                                                                                                                                                                                          | -                        | C_uni91_0180_mRNA_5.1 | -                    |
| GF0042075 | 0                     | 1                | 1                 | 0 Hypothetical protein (1)                                             |                                                                                                                                                                                                                                      |                                                                                                                                                                                                                                                                                                                                                                                                                                                                                          | -                        | C_uni91_0180_mRNA_3.1 | -                    |
| GF0042074 | 0                     | 1                | 1                 | 0 Hypothetical protein (1)                                             |                                                                                                                                                                                                                                      |                                                                                                                                                                                                                                                                                                                                                                                                                                                                                          | -                        | C_uni91_0180_mRNA_2.1 | -                    |
| GF0042073 | 0                     | 1                | 1                 | 0 Hypothetical protein (1)                                             |                                                                                                                                                                                                                                      |                                                                                                                                                                                                                                                                                                                                                                                                                                                                                          | -                        | C_uni91_0180_mRNA_1.1 | -                    |
| GF0042072 | 0                     | 1                | 1                 | 0 Hypothetical protein (1)                                             |                                                                                                                                                                                                                                      |                                                                                                                                                                                                                                                                                                                                                                                                                                                                                          | -                        | C_uni91_0179_mRNA_4.1 | -                    |
| GF0042071 | 0                     | 1                | 1                 | 0 LRR receptor-like kinase (1)                                         | protein binding [GO:0005515 molecular_function] (1)                                                                                                                                                                                  | Leucine-rich repeat [IPR01611] (1); Leucine-rich repeat-containing N-terminal, plant-type [IPR013210] (1); Leucine-rich repeat, typical subtype [IPR003591] (1); Leucine-rich repeat domain, I. domain-like [IPR032675] (1)                                                                                                                                                                                                                                                              | -                        | C_uni91_0178_mRNA_3.1 | -                    |
| GF0042070 | 0                     | 1                | 1                 | 0 Hypothetical protein (1)                                             |                                                                                                                                                                                                                                      |                                                                                                                                                                                                                                                                                                                                                                                                                                                                                          | -                        | C_uni91_0178_mRNA_1.1 | -                    |
| GF0042069 | 0                     | 1                | 1                 | 0 Hypothetical protein (1)                                             | nucleic acid binding [GO:0003676 molecular_function] (1); zinc ion binding [GO:0008270 molecular_function] (1)                                                                                                                       | Zinc finger, CCHC-type [IPR011878] (1)                                                                                                                                                                                                                                                                                                                                                                                                                                                   | -                        | C_uni91_0176_mRNA_5.1 | -                    |
| GF0042068 | 0                     | 1                | 1                 | 0 Hypothetical protein (1)                                             | cytosine-type peptidase activity [GO:0008234 molecular_function] (1); proteolysis [GO:0000508 biological_process] (1)                                                                                                                | Ulp1 protease family, C-terminal catalytic domain [IPR003653] (1)                                                                                                                                                                                                                                                                                                                                                                                                                        | -                        | C_uni91_0176_mRNA_4.1 | -                    |
| GF0042067 | 0                     | 1                | 1                 | 0 Hypothetical protein (1)                                             | protein binding [GO:0005515 molecular_function] (1)                                                                                                                                                                                  | Leucine-rich repeat [IPR01611] (1); Leucine-rich repeat domain, I. domain-like [IPR032675] (1); Leucine-rich repeat, typical subtype [IPR003591] (1)                                                                                                                                                                                                                                                                                                                                     | -                        | C_uni91_0175_mRNA_2.1 | -                    |
| GF0042066 | 0                     | 1                | 1                 | 0 Hypothetical protein (1)                                             |                                                                                                                                                                                                                                      |                                                                                                                                                                                                                                                                                                                                                                                                                                                                                          | -                        | C_uni91_0174_mRNA_5.1 | -                    |
| GF0042065 | 0                     | 1                | 1                 | 0 Hypothetical protein (1)                                             | zinc ion binding [GO:0008270 molecular_function] (1); regulation of transcription, DNA-templated [GO:0006355 biological_process] (1)                                                                                                 | FHY5/EAR1 family [IPR01052] (1); Zinc finger, PMP-type [IPR006044] (1); Zinc finger, SWIM-type [IPR007527] (1)                                                                                                                                                                                                                                                                                                                                                                           | -                        | C_uni91_0174_mRNA_4.1 | -                    |
| GF0042064 | 0                     | 1                | 1                 | 0 LRR receptor-like kinase (1)                                         | protein binding [GO:0005515 molecular_function] (1)                                                                                                                                                                                  | Leucine-rich repeat domain, I. domain-like [IPR01611] (1); Leucine-rich repeat-containing N-terminal, plant-type [IPR013210] (1)                                                                                                                                                                                                                                                                                                                                                         | -                        | C_uni91_0172_mRNA_2.1 | -                    |
| GF0042063 | 0                     | 1                | 1                 | 0 Hypothetical protein (1)                                             |                                                                                                                                                                                                                                      |                                                                                                                                                                                                                                                                                                                                                                                                                                                                                          | -                        | C_uni91_0171_mRNA_5.1 | -                    |
| GF0042062 | 0                     | 1                | 1                 | 0 Hypothetical protein (1)                                             |                                                                                                                                                                                                                                      |                                                                                                                                                                                                                                                                                                                                                                                                                                                                                          | -                        | C_uni91_0171_mRNA_4.1 | -                    |
| GF0042061 | 0                     | 1                | 1                 | 0 Hypothetical protein (1)                                             |                                                                                                                                                                                                                                      |                                                                                                                                                                                                                                                                                                                                                                                                                                                                                          | -                        | C_uni91_0171_mRNA_1.1 | -                    |
| GF0042060 | 0                     | 1                | 1                 | 0 Hypothetical protein (1)                                             |                                                                                                                                                                                                                                      |                                                                                                                                                                                                                                                                                                                                                                                                                                                                                          | -                        | C_uni91_0170_mRNA_2.1 | -                    |
| GF0042059 | 0                     | 1                | 1                 | 0 Hypothetical protein (1)                                             |                                                                                                                                                                                                                                      | Reverse transcriptase zinc-binding domain [IPR026960] (1)                                                                                                                                                                                                                                                                                                                                                                                                                                | -                        | C_uni91_0170_mRNA_1.1 | -                    |
| GF0042058 | 0                     | 1                | 1                 | 0 Hypothetical protein (1)                                             | nucleic acid binding [GO:0003676 molecular_function] (1); zinc ion binding [GO:0008270 molecular_function] (1)                                                                                                                       | Zinc finger, CCHC-type [IPR011878] (1)                                                                                                                                                                                                                                                                                                                                                                                                                                                   | -                        | C_uni91_0169_mRNA_3.1 | -                    |
| GF0042057 | 0                     | 1                | 1                 | 0 Hypothetical protein (1)                                             |                                                                                                                                                                                                                                      |                                                                                                                                                                                                                                                                                                                                                                                                                                                                                          | -                        | C_uni91_0169_mRNA_2.1 | -                    |
| GF0042056 | 0                     | 1                | 1                 | 0 Hypothetical protein (1)                                             | nucleic acid binding [GO:0003676 molecular_function] (1)                                                                                                                                                                             | Ribonuclease H-like domain [IPR012337] (1)                                                                                                                                                                                                                                                                                                                                                                                                                                               | -                        | C_uni91_0169_mRNA_1.1 | -                    |
| GF0042055 | 0                     | 1                | 1                 | 0 Hypothetical protein (1)                                             |                                                                                                                                                                                                                                      |                                                                                                                                                                                                                                                                                                                                                                                                                                                                                          | -                        | C_uni91_0168_mRNA_4.1 | -                    |
| GF0042054 | 0                     | 1                | 1                 | 0 Hypothetical protein (1)                                             |                                                                                                                                                                                                                                      | High mobility group box domain [IPR009071] (1)                                                                                                                                                                                                                                                                                                                                                                                                                                           | -                        | C_uni91_0168_mRNA_2.1 | -                    |
| GF0042053 | 0                     | 1                | 1                 | 0 Hypothetical protein (1)                                             |                                                                                                                                                                                                                                      |                                                                                                                                                                                                                                                                                                                                                                                                                                                                                          | -                        | C_uni91_0168_mRNA_1.1 | -                    |
| GF0042052 | 0                     | 1                | 1                 | 0 Cs-ubiquitin resistance protein, putative isoform 1 (1)              | ADP binding [GO:0043531 molecular_function] (1)                                                                                                                                                                                      | P-loop containing nucleoside triphosphate hydrolase [IPR027417] (1); NB-ABC [IPR00362] (1); Leucine-rich repeat domain, I. domain-like [IPR032675] (1)                                                                                                                                                                                                                                                                                                                                   | -                        | C_uni91_0167_mRNA_4.1 | -                    |
| GF0042051 | 0                     | 1                | 1                 | 0 Hypothetical protein (1)                                             |                                                                                                                                                                                                                                      |                                                                                                                                                                                                                                                                                                                                                                                                                                                                                          | -                        | C_uni91_0167_mRNA_2.1 | -                    |
| GF0042050 | 0                     | 1                | 1                 | 0 Hypothetical protein (1)                                             |                                                                                                                                                                                                                                      |                                                                                                                                                                                                                                                                                                                                                                                                                                                                                          | -                        | C_uni91_0166_mRNA_3.1 | -                    |
| GF0042049 | 0                     | 1                | 1                 | 0 Hypothetical protein (1)                                             |                                                                                                                                                                                                                                      |                                                                                                                                                                                                                                                                                                                                                                                                                                                                                          | -                        | C_uni91_0166_mRNA_2.1 | -                    |
| GF0042048 | 0                     | 1                | 1                 | 0 Hypothetical protein (1)                                             |                                                                                                                                                                                                                                      |                                                                                                                                                                                                                                                                                                                                                                                                                                                                                          | -                        | C_uni91_0165_mRNA_4.1 | -                    |
| GF0042047 | 0                     | 1                | 1                 | 0 Hypothetical protein (1)                                             |                                                                                                                                                                                                                                      |                                                                                                                                                                                                                                                                                                                                                                                                                                                                                          | -                        | C_uni91_0165_mRNA_3.1 | -                    |
| GF0042046 | 0                     | 1                | 1                 | 0 Hypothetical protein (1)                                             |                                                                                                                                                                                                                                      |                                                                                                                                                                                                                                                                                                                                                                                                                                                                                          | -                        | C_uni91_0165_mRNA_2.1 | -                    |
| GF0042045 | 0                     | 1                | 1                 | 0 Hypothetical protein (1)                                             | protein phosphorylation [GO:0006468 biological_process] (1); protein kinase activity [GO:0004672 molecular_function] (1); ATP binding [GO:0005524 molecular_function] (1)                                                            | Protein kinase domain [IPR000719] (1); Concavulin A-like lectin/glycanase domain [IPR013320] (1); Protein kinase-like domain [IPR011099] (1); Serine/threonine dual specificity protein kinase, catalytic domain [IPR02290] (1); Serine/threonine-protein kinase, active site [IPR008271] (1)                                                                                                                                                                                            | -                        | C_uni91_0165_mRNA_1.1 | -                    |
| GF0042044 | 0                     | 1                | 1                 | 0 Hypothetical protein (1)                                             |                                                                                                                                                                                                                                      | P-loop containing nucleoside triphosphate hydrolase [IPR027417] (1); ABC-transporter extension domain [IPR02781] (1); ABC-transporter, conserved site [IPR013871] (1); ABC-transporter-like [IPR03439] (1); AAA+-ATPase domain [IPR003595] (1); P-loop containing nucleoside triphosphate hydrolase [IPR027417] (1)                                                                                                                                                                      | -                        | C_uni91_0163_mRNA_5.1 | -                    |
| GF0042043 | 0                     | 1                | 1                 | 0 ABC transporter F family member 1 (1)                                | ATP binding [GO:0005524 molecular_function] (1); ATPase activity [GO:0016887 molecular_function] (1)                                                                                                                                 | Rasoman-like alpha-teta-alpha sandwich fold [IPR014729] (1)                                                                                                                                                                                                                                                                                                                                                                                                                              | -                        | C_uni91_0163_mRNA_1.1 | -                    |
| GF0042042 | 0                     | 1                | 1                 | 0 Hypothetical protein (1)                                             | protein prenyltransferase activity [GO:0008118 molecular_function] (1); protein prenylation [GO:0018342 biological_process] (1)                                                                                                      | Protein prenyltransferase, alpha subunit [IPR02088] (1)                                                                                                                                                                                                                                                                                                                                                                                                                                  | -                        | C_uni91_0161_mRNA_2.1 | -                    |
| GF0042041 | 0                     | 1                | 1                 | 0 Hypothetical protein (1)                                             |                                                                                                                                                                                                                                      |                                                                                                                                                                                                                                                                                                                                                                                                                                                                                          | -                        | C_uni91_0161_mRNA_1.1 | -                    |
| GF0042040 | 0                     | 1                | 1                 | 0 Hypothetical protein (1)                                             |                                                                                                                                                                                                                                      |                                                                                                                                                                                                                                                                                                                                                                                                                                                                                          | -                        | C_uni91_0160_mRNA_5.1 | -                    |
| GF0042039 | 0                     | 1                | 1                 | 0 Hypothetical protein (1)                                             |                                                                                                                                                                                                                                      |                                                                                                                                                                                                                                                                                                                                                                                                                                                                                          | -                        | C_uni91_0160_mRNA_4.1 | -                    |
| GF0042038 | 0                     | 1                | 1                 | 0 Hypothetical protein (1)                                             |                                                                                                                                                                                                                                      |                                                                                                                                                                                                                                                                                                                                                                                                                                                                                          | -                        | C_uni91_0159_mRNA_4.1 | -                    |
| GF0042037 | 0                     | 1                | 1                 | 0 Hypothetical protein (1)                                             |                                                                                                                                                                                                                                      |                                                                                                                                                                                                                                                                                                                                                                                                                                                                                          | -                        | C_uni91_0159_mRNA_3.1 | -                    |
| GF0042036 | 0                     | 1                | 1                 | 0 Glucan endo-1,3-beta-glucanase 7 (1)                                 | hydrolase activity, hydrolyzing O-glycosyl compounds [GO:0004555 molecular_function] (1); carbohydrate metabolic process [GO:0005975 biological_process] (1)                                                                         | XX domain [IPR012946] (1); Glycoside hydrolase family 17 [IPR00490] (1); Glycoside hydrolase superfamily [IPR017853] (1); Glycoside hydrolase, catalytic domain [IPR013781] (1); Domain of unknown function DUF632 [IPR00680] (1)                                                                                                                                                                                                                                                        | -                        | C_uni91_0159_mRNA_1.1 | -                    |
| GF0042035 | 0                     | 1                | 1                 | 0 Hypothetical protein (1)                                             |                                                                                                                                                                                                                                      | Thioredoxin-like fold [IPR012336] (1); Thioredoxin-like fold [IPR012336] (1)                                                                                                                                                                                                                                                                                                                                                                                                             | -                        | C_uni91_0158_mRNA_2.1 | -                    |
| GF0042034 | 0                     | 1                | 1                 | 0 Glutathione S-transferase L3 (1)                                     | protein binding [GO:0005515 molecular_function] (1)                                                                                                                                                                                  | Thioredoxin-like fold [IPR012336] (1); Glutathione S-transferase, C-terminal-like [IPR010973] (1); Glutathione S-transferase, N-terminal [IPR004045] (1)                                                                                                                                                                                                                                                                                                                                 | -                        | C_uni91_0156_mRNA_2.1 | -                    |
| GF0042033 | 0                     | 1                | 1                 | 0 Lambda class glutathione S-transferase (1)                           | protein binding [GO:0005515 molecular_function] (1)                                                                                                                                                                                  | Thioredoxin-like fold [IPR012336] (1); Glutathione S-transferase, C-terminal-like [IPR010973] (1); Glutathione S-transferase, N-terminal [IPR004045] (1)                                                                                                                                                                                                                                                                                                                                 | -                        | C_uni91_0156_mRNA_1.1 | -                    |

| ID        | Num. in <i>C. crottensteini</i> | Num. in <i>C. caudata</i> | Num. in <i>P. trifidata</i> | Note                                                         | GO                                                                                                                                                                                                                                                                                                                 | InterPro                                                                                                                                                                                         | Members in <i>C. crottensteini</i> | Members in <i>C. caudata</i> | Members in <i>P. trifidata</i> |
|-----------|---------------------------------|---------------------------|-----------------------------|--------------------------------------------------------------|--------------------------------------------------------------------------------------------------------------------------------------------------------------------------------------------------------------------------------------------------------------------------------------------------------------------|--------------------------------------------------------------------------------------------------------------------------------------------------------------------------------------------------|------------------------------------|------------------------------|--------------------------------|
| GF0042032 | 0                               | 1                         | 1                           | 0 Hypothetical protein (1)                                   |                                                                                                                                                                                                                                                                                                                    | Ribonuclease H1, N-terminal [IPR013201] (1); Ribosomal protein L5/RNase H1, N-terminal [IPR009027] (1); Metallo-dependent phosphatase-like [IPR029625] (1)                                       | -                                  | C_ushii_01955_mRNA_5.1       | -                              |
| GF0042031 | 0                               | 1                         | 1                           | 0 Hypothetical protein (1)                                   |                                                                                                                                                                                                                                                                                                                    | -                                                                                                                                                                                                | -                                  | C_ushii_01955_mRNA_3.1       | -                              |
| GF0042030 | 0                               | 1                         | 1                           | 0 Hypothetical protein (1)                                   |                                                                                                                                                                                                                                                                                                                    | -                                                                                                                                                                                                | -                                  | C_ushii_01955_mRNA_2.1       | -                              |
| GF0042029 | 0                               | 1                         | 1                           | 0 Hypothetical protein (1)                                   |                                                                                                                                                                                                                                                                                                                    | -                                                                                                                                                                                                | -                                  | C_ushii_01954_mRNA_4.1       | -                              |
| GF0042028 | 0                               | 1                         | 1                           | 0 Hypothetical protein (1)                                   | fatty acid biosynthesis process [GO:0006633 biological_process] (1)                                                                                                                                                                                                                                                | Acyl carrier protein-like [IPR009081] (1); Acyl carrier protein (ACP) [IPR002313] (1); Phosphopantetheine attachment site [IPR006162] (1)                                                        | -                                  | C_ushii_01954_mRNA_2.1       | -                              |
| GF0042027 | 0                               | 1                         | 1                           | 0 Hypothetical protein (1)                                   |                                                                                                                                                                                                                                                                                                                    | -                                                                                                                                                                                                | -                                  | C_ushii_01954_mRNA_1.1       | -                              |
| GF0042026 | 0                               | 1                         | 1                           | 0 Hypothetical protein (1)                                   |                                                                                                                                                                                                                                                                                                                    | -                                                                                                                                                                                                | -                                  | C_ushii_01952_mRNA_1.1       | -                              |
| GF0042025 | 0                               | 1                         | 1                           | 0 Hypothetical protein (1)                                   |                                                                                                                                                                                                                                                                                                                    | -                                                                                                                                                                                                | -                                  | C_ushii_01950_mRNA_5.1       | -                              |
| GF0042024 | 0                               | 1                         | 1                           | 0 Hypothetical protein (1)                                   |                                                                                                                                                                                                                                                                                                                    | -                                                                                                                                                                                                | -                                  | C_ushii_01950_mRNA_1.1       | -                              |
| GF0042023 | 0                               | 1                         | 1                           | 0 Hypothetical protein (1)                                   |                                                                                                                                                                                                                                                                                                                    | -                                                                                                                                                                                                | -                                  | C_ushii_01949_mRNA_1.1       | -                              |
| GF0042022 | 0                               | 1                         | 1                           | 0 Hypothetical protein (1)                                   |                                                                                                                                                                                                                                                                                                                    | -                                                                                                                                                                                                | -                                  | C_ushii_01948_mRNA_2.1       | -                              |
| GF0042021 | 0                               | 1                         | 1                           | 0 Hypothetical protein (1)                                   |                                                                                                                                                                                                                                                                                                                    | -                                                                                                                                                                                                | -                                  | C_ushii_01948_mRNA_1.1       | -                              |
| GF0042020 | 0                               | 1                         | 1                           | 0 Hypothetical protein (1)                                   | nucleic acid binding [GO:0003676 molecular_function] (1)                                                                                                                                                                                                                                                           | Ribonuclease H-like domain [IPR012337] (1); Domain of unknown function DUF4371 [IPR025398] (1)                                                                                                   | -                                  | C_ushii_01947_mRNA_5.1       | -                              |
| GF0042019 | 0                               | 1                         | 1                           | 0 LRR receptor-like serine/threonine-protein kinase FLS2 (1) | protein binding [GO:0005515 molecular_function] (1)                                                                                                                                                                                                                                                                | Protein kinase-like domain [IPR011009] (1); Leucine-rich repeat domain, L domain-like [IPR032675] (1); Leucine-rich repeat, typical subtype [IPR003591] (1); Leucine-rich repeat [IPR001611] (1) | -                                  | C_ushii_01947_mRNA_1.1       | -                              |
| GF0042018 | 0                               | 1                         | 1                           | 0 Hypothetical protein (1)                                   |                                                                                                                                                                                                                                                                                                                    | -                                                                                                                                                                                                | -                                  | C_ushii_01946_mRNA_3.1       | -                              |
| GF0042017 | 0                               | 1                         | 1                           | 0 Pentatricopeptide repeat-containing family protein (1)     | protein binding [GO:0005515 molecular_function] (1)                                                                                                                                                                                                                                                                | Pentatricopeptide repeat [IPR022885] (1); Tetranucleotide-like helical domain [IPR011990] (1)                                                                                                    | -                                  | C_ushii_01946_mRNA_2.1       | -                              |
| GF0042016 | 0                               | 1                         | 1                           | 0 LRR receptor-like kinase (1)                               |                                                                                                                                                                                                                                                                                                                    | Leucine-rich repeat domain, L domain-like [IPR032675] (1); Leucine-rich repeat, typical subtype [IPR003591] (1)                                                                                  | -                                  | C_ushii_01944_mRNA_3.1       | -                              |
| GF0042015 | 0                               | 1                         | 1                           | 0 Hypothetical protein (1)                                   |                                                                                                                                                                                                                                                                                                                    | -                                                                                                                                                                                                | -                                  | C_ushii_01943_mRNA_4.1       | -                              |
| GF0042014 | 0                               | 1                         | 1                           | 0 Hypothetical protein (1)                                   | nucleic acid binding [GO:0003676 molecular_function] (1)                                                                                                                                                                                                                                                           | Ribonuclease H-like domain [IPR012337] (1)                                                                                                                                                       | -                                  | C_ushii_01943_mRNA_3.1       | -                              |
| GF0042013 | 0                               | 1                         | 1                           | 0 Hypothetical protein (1)                                   |                                                                                                                                                                                                                                                                                                                    | -                                                                                                                                                                                                | -                                  | C_ushii_01942_mRNA_1.1       | -                              |
| GF0042012 | 0                               | 1                         | 1                           | 0 Hypothetical protein (1)                                   |                                                                                                                                                                                                                                                                                                                    | -                                                                                                                                                                                                | -                                  | C_ushii_01941_mRNA_7.1       | -                              |
| GF0042011 | 0                               | 1                         | 1                           | 0 Hypothetical protein (1)                                   |                                                                                                                                                                                                                                                                                                                    | -                                                                                                                                                                                                | -                                  | C_ushii_01941_mRNA_4.1       | -                              |
| GF0042010 | 0                               | 1                         | 1                           | 0 Hypothetical leucine rich repeat protein (1)               | protein binding [GO:0005515 molecular_function] (1)                                                                                                                                                                                                                                                                | Leucine-rich repeat domain, L domain-like [IPR032675] (1); Leucine-rich repeat [IPR001611] (1)                                                                                                   | -                                  | C_ushii_01940_mRNA_4.1       | -                              |
| GF0042009 | 0                               | 1                         | 1                           | 0 Hypothetical protein (1)                                   |                                                                                                                                                                                                                                                                                                                    | -                                                                                                                                                                                                | -                                  | C_ushii_01940_mRNA_3.1       | -                              |
| GF0042008 | 0                               | 1                         | 1                           | 0 Hypothetical protein (1)                                   |                                                                                                                                                                                                                                                                                                                    | -                                                                                                                                                                                                | -                                  | C_ushii_01940_mRNA_2.1       | -                              |
| GF0042007 | 0                               | 1                         | 1                           | 0 Hypothetical protein (1)                                   | zinc ion binding [GO:0008270 molecular_function] (1); nucleic acid binding [GO:0003676 molecular_function] (1)                                                                                                                                                                                                     | Zinc finger, CCHC-type [IPR001878] (1); Zinc knuckle CXC4HX4C [IPR025836] (1); Endonuclease/exonuclease/phosphatase [IPR005135] (1)                                                              | -                                  | C_ushii_01940_mRNA_1.1       | -                              |
| GF0042006 | 0                               | 1                         | 1                           | 0 Hypothetical protein (1)                                   |                                                                                                                                                                                                                                                                                                                    | -                                                                                                                                                                                                | -                                  | C_ushii_01939_mRNA_5.1       | -                              |
| GF0042005 | 0                               | 1                         | 1                           | 0 Hypothetical protein (1)                                   |                                                                                                                                                                                                                                                                                                                    | -                                                                                                                                                                                                | -                                  | C_ushii_01939_mRNA_2.1       | -                              |
| GF0042004 | 0                               | 1                         | 1                           | 0 Hypothetical protein (1)                                   |                                                                                                                                                                                                                                                                                                                    | Domain of unknown function DUF1985 [IPR015410] (1); Transferase [IPR003480] (1); Chloramphenicol acetyltransferase-like domain [IPR023213] (1)                                                   | -                                  | C_ushii_01938_mRNA_3.1       | -                              |
| GF0042003 | 0                               | 1                         | 1                           | 0 Vinorelbine synthase (1)                                   | transferase activity, transferring acyl groups other than amino-acyl groups [GO:0016747 molecular_function] (1)                                                                                                                                                                                                    | -                                                                                                                                                                                                | -                                  | C_ushii_01935_mRNA_3.1       | -                              |
| GF0042002 | 0                               | 1                         | 1                           | 0 Hypothetical protein (1)                                   |                                                                                                                                                                                                                                                                                                                    | -                                                                                                                                                                                                | -                                  | C_ushii_01935_mRNA_2.1       | -                              |
| GF0042001 | 0                               | 1                         | 1                           | 0 Flavonoid 3',5'-hydroxylase (1)                            | iron ion binding [GO:0005506 molecular_function] (1); heme binding [GO:0020617 molecular_function] (1); oxidoreductase activity, acting on paired donors, with incorporation or reduction of molecular oxygen [GO:0016705 molecular_function] (1); oxidation-reduction process [GO:0008114 biological_process] (1) | Cytochrome P450, conserved site [IPR017972] (1); Cytochrome P450, E-class, group 1 [IPR02401] (1); Cytochrome P450 [IPR001128] (1)                                                               | -                                  | C_ushii_01934_mRNA_2.1       | -                              |
| GF0042000 | 0                               | 1                         | 1                           | 0 Flavonoid 3',5'-hydroxylase (1)                            | oxidoreductase activity, acting on paired donors, with incorporation or reduction of molecular oxygen [GO:0016705 molecular_function] (1); oxidation-reduction process [GO:0008114 biological_process] (1); heme binding [GO:0020617 molecular_function] (1); iron ion binding [GO:0005506 molecular_function] (1) | Cytochrome P450, conserved site [IPR017972] (1); Cytochrome P450, E-class, group 1 [IPR02401] (1); Cytochrome P450 [IPR001128] (1)                                                               | -                                  | C_ushii_01934_mRNA_1.1       | -                              |
| GF0041999 | 0                               | 1                         | 1                           | 0 Hypothetical protein (1)                                   |                                                                                                                                                                                                                                                                                                                    | -                                                                                                                                                                                                | -                                  | C_ushii_01933_mRNA_5.1       | -                              |
| GF0041998 | 0                               | 1                         | 1                           | 0 Hypothetical protein (1)                                   |                                                                                                                                                                                                                                                                                                                    | -                                                                                                                                                                                                | -                                  | C_ushii_01933_mRNA_4.1       | -                              |
| GF0041997 | 0                               | 1                         | 1                           | 0 Hypothetical protein (1)                                   |                                                                                                                                                                                                                                                                                                                    | -                                                                                                                                                                                                | -                                  | C_ushii_01933_mRNA_2.1       | -                              |
| GF0041996 | 0                               | 1                         | 1                           | 0 Hypothetical protein (1)                                   | proteolysis [GO:0006508 biological_process] (1); aspartic-type endopeptidase activity [GO:0004190 molecular_function] (1)                                                                                                                                                                                          | Reverse transcriptase domain [IPR000477] (1); Peptidase A2A, retrovirus, catalytic [IPR001995] (1)                                                                                               | -                                  | C_ushii_01933_mRNA_15.1      | -                              |
| GF0041995 | 0                               | 1                         | 1                           | 0 Hypothetical protein (1)                                   |                                                                                                                                                                                                                                                                                                                    | -                                                                                                                                                                                                | -                                  | C_ushii_01933_mRNA_12.1      | -                              |
| GF0041994 | 0                               | 1                         | 1                           | 0 Hypothetical protein (1)                                   |                                                                                                                                                                                                                                                                                                                    | -                                                                                                                                                                                                | -                                  | C_ushii_01932_mRNA_6.1       | -                              |
| GF0041993 | 0                               | 1                         | 1                           | 0 Hypothetical protein (1)                                   |                                                                                                                                                                                                                                                                                                                    | Viral movement protein [IPR028919] (1)                                                                                                                                                           | -                                  | C_ushii_01932_mRNA_5.1       | -                              |
| GF0041992 | 0                               | 1                         | 1                           | 0 Hypothetical protein (1)                                   |                                                                                                                                                                                                                                                                                                                    | -                                                                                                                                                                                                | -                                  | C_ushii_01932_mRNA_4.1       | -                              |
| GF0041991 | 0                               | 1                         | 1                           | 0 Hypothetical protein (1)                                   |                                                                                                                                                                                                                                                                                                                    | -                                                                                                                                                                                                | -                                  | C_ushii_01931_mRNA_4.1       | -                              |
| GF0041990 | 0                               | 1                         | 1                           | 0 Hypothetical protein (1)                                   |                                                                                                                                                                                                                                                                                                                    | -                                                                                                                                                                                                | -                                  | C_ushii_01931_mRNA_3.1       | -                              |
| GF0041989 | 0                               | 1                         | 1                           | 0 Hypothetical protein (1)                                   |                                                                                                                                                                                                                                                                                                                    | -                                                                                                                                                                                                | -                                  | C_ushii_01930_mRNA_8.1       | -                              |
| GF0041988 | 0                               | 1                         | 1                           | 0 Ribonuclease H protein, putative (1)                       |                                                                                                                                                                                                                                                                                                                    | Reverse transcriptase zinc-binding domain [IPR026960] (1)                                                                                                                                        | -                                  | C_ushii_01930_mRNA_5.1       | -                              |
| GF0041987 | 0                               | 1                         | 1                           | 0 Random shg protein 5 (1)                                   |                                                                                                                                                                                                                                                                                                                    | CRAL/TRIO, N-terminal domain [IPR010741] (1); CRAL/TRIO lipid binding domain [IPR01251] (1)                                                                                                      | -                                  | C_ushii_01930_mRNA_4.1       | -                              |
| GF0041986 | 0                               | 1                         | 1                           | 0 Chaperone protein dnaJ 49 (1)                              |                                                                                                                                                                                                                                                                                                                    | Domain of unknown function DUF1977, DnaJ-like [IPR015399] (1)                                                                                                                                    | -                                  | C_ushii_01930_mRNA_1.1       | -                              |
| GF0041985 | 0                               | 1                         | 1                           | 0 Hypothetical protein (1)                                   |                                                                                                                                                                                                                                                                                                                    | -                                                                                                                                                                                                | -                                  | C_ushii_01929_mRNA_4.1       | -                              |
| GF0041984 | 0                               | 1                         | 1                           | 0 Translation machinery associated TMA7 (1)                  |                                                                                                                                                                                                                                                                                                                    | Translation machinery associated TMA7 [IPR015171] (1)                                                                                                                                            | -                                  | C_ushii_01929_mRNA_2.1       | -                              |
| GF0041983 | 0                               | 1                         | 1                           | 0 RNI-like FHD-like domains (1)                              | protein binding [GO:0005515 molecular_function] (1)                                                                                                                                                                                                                                                                | F-box domain [IPR001810] (1); Leucine-rich repeat domain, L domain-like [IPR032675] (1)                                                                                                          | -                                  | C_ushii_01929_mRNA_10.1      | -                              |
| GF0041982 | 0                               | 1                         | 1                           | 0 Hypothetical protein (1)                                   |                                                                                                                                                                                                                                                                                                                    | -                                                                                                                                                                                                | -                                  | C_ushii_01929_mRNA_1.1       | -                              |
| GF0041981 | 0                               | 1                         | 1                           | 0 Hypothetical protein (1)                                   | polysaccharide binding [GO:0030247 molecular_function] (1)                                                                                                                                                                                                                                                         | Wall-associated receptor kinase, galactosamin-binding domain [IPR025287] (1)                                                                                                                     | -                                  | C_ushii_01928_mRNA_8.1       | -                              |
| GF0041980 | 0                               | 1                         | 1                           | 0 Hypothetical protein (1)                                   |                                                                                                                                                                                                                                                                                                                    | -                                                                                                                                                                                                | -                                  | C_ushii_01928_mRNA_7.1       | -                              |
| GF0041979 | 0                               | 1                         | 1                           | 0 Hypothetical protein (1)                                   |                                                                                                                                                                                                                                                                                                                    | -                                                                                                                                                                                                | -                                  | C_ushii_01928_mRNA_4.1       | -                              |
| GF0041978 | 0                               | 1                         | 1                           | 0 Hypothetical protein (1)                                   |                                                                                                                                                                                                                                                                                                                    | -                                                                                                                                                                                                | -                                  | C_ushii_01928_mRNA_3.1       | -                              |
| GF0041977 | 0                               | 1                         | 1                           | 0 Hypothetical protein (1)                                   |                                                                                                                                                                                                                                                                                                                    | Retroviral aspartyl protease [IPR013342] (1)                                                                                                                                                     | -                                  | C_ushii_01928_mRNA_2.2       | -                              |
| GF0041976 | 0                               | 1                         | 1                           | 0 Hypothetical protein (1)                                   |                                                                                                                                                                                                                                                                                                                    | -                                                                                                                                                                                                | -                                  | C_ushii_01928_mRNA_1.1       | -                              |
| GF0041975 | 0                               | 1                         | 1                           | 0 Hypothetical protein (1)                                   |                                                                                                                                                                                                                                                                                                                    | -                                                                                                                                                                                                | -                                  | C_ushii_01927_mRNA_1.1       | -                              |
| GF0041974 | 0                               | 1                         | 1                           | 0 Hypothetical protein (1)                                   |                                                                                                                                                                                                                                                                                                                    | -                                                                                                                                                                                                | -                                  | C_ushii_01926_mRNA_6.1       | -                              |
| GF0041973 | 0                               | 1                         | 1                           | 0 Hypothetical protein (1)                                   |                                                                                                                                                                                                                                                                                                                    | -                                                                                                                                                                                                | -                                  | C_ushii_01926_mRNA_1.1       | -                              |
| GF0041972 | 0                               | 1                         | 1                           | 0 Hypothetical protein (1)                                   |                                                                                                                                                                                                                                                                                                                    | Histidine phosphatase superfamily, clade-1 [IPR013078] (1); Histidine phosphatase superfamily [IPR026033] (1)                                                                                    | -                                  | C_ushii_01924_mRNA_6.1       | -                              |
| GF0041971 | 0                               | 1                         | 1                           | 0 Hypothetical protein (1)                                   |                                                                                                                                                                                                                                                                                                                    | -                                                                                                                                                                                                | -                                  | C_ushii_01924_mRNA_5.1       | -                              |
| GF0041970 | 0                               | 1                         | 1                           | 0 Hypothetical protein (1)                                   |                                                                                                                                                                                                                                                                                                                    | Chrom domain-like [IPR016197] (1)                                                                                                                                                                | -                                  | C_ushii_01923_mRNA_5.1       | -                              |
| GF0041969 | 0                               | 1                         | 1                           | 0 Hypothetical protein (1)                                   |                                                                                                                                                                                                                                                                                                                    | -                                                                                                                                                                                                | -                                  | C_ushii_01923_mRNA_1.1       | -                              |
| GF0041968 | 0                               | 1                         | 1                           | 0 Hypothetical protein (1)                                   |                                                                                                                                                                                                                                                                                                                    | -                                                                                                                                                                                                | -                                  | C_ushii_01919_mRNA_1.1       | -                              |
| GF0041967 | 0                               | 1                         | 1                           | 0 Hypothetical protein (1)                                   |                                                                                                                                                                                                                                                                                                                    | -                                                                                                                                                                                                | -                                  | C_ushii_01918_mRNA_2.1       | -                              |
| GF0041966 | 0                               | 1                         | 1                           | 0 Hypothetical protein (1)                                   |                                                                                                                                                                                                                                                                                                                    | -                                                                                                                                                                                                | -                                  | C_ushii_01917_mRNA_2.1       | -                              |
| GF0041965 | 0                               | 1                         | 1                           | 0 Hypothetical protein (1)                                   |                                                                                                                                                                                                                                                                                                                    | -                                                                                                                                                                                                | -                                  | C_ushii_01917_mRNA_1.1       | -                              |
| GF0041964 | 0                               | 1                         | 1                           | 0 NBS-LRR class resistance protein Fy1-Ry1 (1)               | ADP binding [GO:0043331 molecular_function] (1)                                                                                                                                                                                                                                                                    | Leucine-rich repeat domain, L domain-like [IPR032675] (1); NBS-ARC [IPR02182] (1); P-loop containing nucleoside triphosphate hydrolase [IPR027417] (1)                                           | -                                  | C_ushii_01916_mRNA_4.1       | -                              |
| GF0041963 | 0                               | 1                         | 1                           | 0 Hypothetical protein (1)                                   |                                                                                                                                                                                                                                                                                                                    | Protein of unknown function DUF594 [IPR007658] (1)                                                                                                                                               | -                                  | C_ushii_01916_mRNA_1.1       | -                              |
| GF0041962 | 0                               | 1                         | 1                           | 0 Hypothetical protein (1)                                   |                                                                                                                                                                                                                                                                                                                    | -                                                                                                                                                                                                | -                                  | C_ushii_01915_mRNA_2.1       | -                              |
| GF0041961 | 0                               | 1                         | 1                           | 0 Hypothetical protein (1)                                   |                                                                                                                                                                                                                                                                                                                    | -                                                                                                                                                                                                | -                                  | C_ushii_01915_mRNA_1.1       | -                              |
| GF0041960 | 0                               | 1                         | 1                           | 0 Hypothetical protein (1)                                   | ATP binding [GO:0005524 molecular_function] (1); protein phosphorylation [GO:0006468 biological_process] (1); protein kinase activity [GO:0004672 molecular_function] (1)                                                                                                                                          | Serine/threonine-protein kinase, active site [IPR008271] (1); Protein kinase domain [IPR007191] (1); Protein kinase-like domain [IPR011609] (1)                                                  | -                                  | C_ushii_01912_mRNA_4.1       | -                              |
| GF0041959 | 0                               | 1                         | 1                           | 0 Hypothetical protein (1)                                   |                                                                                                                                                                                                                                                                                                                    | -                                                                                                                                                                                                | -                                  | C_ushii_01912_mRNA_1.1       | -                              |
| GF0041958 | 0                               | 1                         | 1                           | 0 Hypothetical protein (1)                                   |                                                                                                                                                                                                                                                                                                                    | Leucine-rich repeat-containing N-terminal, plant-type [IPR013210] (1); Leucine-rich repeat domain, L domain-like [IPR032675] (1)                                                                 | -                                  | C_ushii_01911_mRNA_6.1       | -                              |
| GF0041957 | 0                               | 1                         | 1                           | 0 Hypothetical protein (1)                                   |                                                                                                                                                                                                                                                                                                                    | Leucine-rich repeat-containing N-terminal, plant-type [IPR013210] (1); Leucine-rich repeat domain, L domain-like [IPR032675] (1)                                                                 | -                                  | C_ushii_01911_mRNA_5.1       | -                              |
| GF0041956 | 0                               | 1                         | 1                           | 0 Hypothetical protein (1)                                   |                                                                                                                                                                                                                                                                                                                    | -                                                                                                                                                                                                | -                                  | C_ushii_01910_mRNA_2.1       | -                              |
| GF0041955 | 0                               | 1                         | 1                           | 0 Putative non-LTR reverse transcriptase (1)                 |                                                                                                                                                                                                                                                                                                                    | Reverse transcriptase zinc-binding domain [IPR026960] (1)                                                                                                                                        | -                                  | C_ushii_01910_mRNA_1.1       | -                              |
| GF0041954 | 0                               | 1                         | 1                           | 0 Hypothetical protein (1)                                   |                                                                                                                                                                                                                                                                                                                    | -                                                                                                                                                                                                | -                                  | C_ushii_01909_mRNA_3.1       | -                              |
| GF0041953 | 0                               | 1                         | 1                           | 0 Hypothetical protein (1)                                   |                                                                                                                                                                                                                                                                                                                    | -                                                                                                                                                                                                | -                                  | C_ushii_01909_mRNA_2.1       | -                              |
| GF0041952 | 0                               | 1                         | 1                           | 0 Hypothetical protein (1)                                   |                                                                                                                                                                                                                                                                                                                    | -                                                                                                                                                                                                | -                                  | C_ushii_01909_mRNA_1.1       | -                              |
| GF0041951 | 0                               | 1                         | 1                           | 0 Hypothetical protein (1)                                   |                                                                                                                                                                                                                                                                                                                    | Askyris repeat-containing domain [IPR020683] (1)                                                                                                                                                 | -                                  | C_ushii_01908_mRNA_5.1       | -                              |
| GF0041950 | 0                               | 1                         | 1                           | 0 Hypothetical protein (1)                                   |                                                                                                                                                                                                                                                                                                                    | -                                                                                                                                                                                                | -                                  | C_ushii_01907_mRNA_4.1       | -                              |
| GF0041949 | 0                               | 1                         | 1                           | 0 Hypothetical protein (1)                                   |                                                                                                                                                                                                                                                                                                                    | -                                                                                                                                                                                                | -                                  | C_ushii_01907_mRNA_2.1       | -                              |
| GF0041948 | 0                               | 1                         | 1                           | 0 Hypothetical protein (1)                                   |                                                                                                                                                                                                                                                                                                                    | -                                                                                                                                                                                                | -                                  | C_ushii_01907_mRNA_1.1       | -                              |

| ID        | Num. in <i>C. crotolariae</i> | Num. in <i>C. caudata</i> | Num. in <i>P. trifidata</i> | Note                                            | GO                                                                                                                                                                                                                                                                                                                                                                                                                                                                                                                                                | InterPro                                                                                                                                                                                                                                                                                                                                                                                                                                                                                                                                   | Members in <i>C. crotolariae</i> | Members in <i>C. caudata</i> | Members in <i>P. trifidata</i> |
|-----------|-------------------------------|---------------------------|-----------------------------|-------------------------------------------------|---------------------------------------------------------------------------------------------------------------------------------------------------------------------------------------------------------------------------------------------------------------------------------------------------------------------------------------------------------------------------------------------------------------------------------------------------------------------------------------------------------------------------------------------------|--------------------------------------------------------------------------------------------------------------------------------------------------------------------------------------------------------------------------------------------------------------------------------------------------------------------------------------------------------------------------------------------------------------------------------------------------------------------------------------------------------------------------------------------|----------------------------------|------------------------------|--------------------------------|
| GF0041947 | 0                             | 1                         | 1                           | 0 Isoenzyme synthase (1)                        | protein binding [GO:0005515 molecular_function] (1); metabolic process [GO:0008152 biological_process] (1); base activity [GO:0001622 molecular_function] (1); terpenase synthase activity [GO:0010333 molecular_function] (1); magnesium ion binding [GO:0000287 molecular_function] (1)                                                                                                                                                                                                                                                         | Terpene synthase, N-terminal domain [IPR019601] (1); Terpene synthase, metal-binding domain [IPR005630] (1); Terpenoid cyclase-protein [IPR008930] (1); Ubiquitin-related domain [IPR020971] (1); IIRX domain [IPR01012] (1); Isoenzyme synthase domain [IPR008949] (1)                                                                                                                                                                                                                                                                    | -                                | C_uahsh_01906_mRNA_5.1       | -                              |
| GF0041946 | 0                             | 1                         | 1                           | 0 Hypothetical protein (1)                      | -                                                                                                                                                                                                                                                                                                                                                                                                                                                                                                                                                 | -                                                                                                                                                                                                                                                                                                                                                                                                                                                                                                                                          | -                                | C_uahsh_01906_mRNA_2.1       | -                              |
| GF0041945 | 0                             | 1                         | 1                           | 0 Hypothetical protein (1)                      | -                                                                                                                                                                                                                                                                                                                                                                                                                                                                                                                                                 | -                                                                                                                                                                                                                                                                                                                                                                                                                                                                                                                                          | -                                | C_uahsh_01904_mRNA_6.1       | -                              |
| GF0041944 | 0                             | 1                         | 1                           | 0 Hypothetical protein (1)                      | proteolysis [GO:0006508 biological_process] (1); serine-type endopeptidase activity [GO:0070008 molecular_function] (1); serine-type endopeptidase activity [GO:0004252 molecular_function] (1)                                                                                                                                                                                                                                                                                                                                                   | Peptidase S9A, N-terminal domain [IPR023302] (1); Peptidase S9A, prolyl oligopeptidase [IPR02474] (1)                                                                                                                                                                                                                                                                                                                                                                                                                                      | -                                | C_uahsh_01904_mRNA_1.1       | -                              |
| GF0041943 | 0                             | 1                         | 1                           | 0 Hypothetical protein (1)                      | -                                                                                                                                                                                                                                                                                                                                                                                                                                                                                                                                                 | -                                                                                                                                                                                                                                                                                                                                                                                                                                                                                                                                          | -                                | C_uahsh_01903_mRNA_1.1       | -                              |
| GF0041942 | 0                             | 1                         | 1                           | 0 Diccac resistance protein RPM1 (1)            | proteolysis [GO:0006508 biological_process] (1); peptidase activity [GO:0002323 molecular_function] (1); ADP binding [GO:0004351 molecular_function] (1)                                                                                                                                                                                                                                                                                                                                                                                          | Leucine-rich repeat domain, L domain-like [IPR023275] (1); Peptidase C13, Ig domain [IPR011966] (1); P-loop containing nucleoside triphosphate hydrolyase [IPR027471] (1); NB-ARC [IPR002182] (1)                                                                                                                                                                                                                                                                                                                                          | -                                | C_uahsh_01902_mRNA_1.1       | -                              |
| GF0041941 | 0                             | 1                         | 1                           | 0 Hypothetical protein (1)                      | protein binding [GO:0005515 molecular_function] (1)                                                                                                                                                                                                                                                                                                                                                                                                                                                                                               | Leucine-rich repeat-containing N-terminal, plant-type [IPR013210] (1); Leucine-rich repeat [IPR01011] (1); Leucine-rich repeat, typical subtype [IPR003591] (1); Leucine-rich repeat domain, L domain-like [IPR023275] (1)                                                                                                                                                                                                                                                                                                                 | -                                | C_uahsh_01900_mRNA_6.1       | -                              |
| GF0041940 | 0                             | 1                         | 1                           | 0_LRR receptor-like kinase family protein (1)   | protein binding [GO:0005515 molecular_function] (1)                                                                                                                                                                                                                                                                                                                                                                                                                                                                                               | Leucine-rich repeat domain, L domain-like [IPR023275] (1); Leucine-rich repeat, typical subtype [IPR003591] (1); Leucine-rich repeat [IPR01011] (1)                                                                                                                                                                                                                                                                                                                                                                                        | -                                | C_uahsh_01900_mRNA_2.1       | -                              |
| GF0041939 | 0                             | 1                         | 1                           | 0 DUF3049 family protein (1)                    | -                                                                                                                                                                                                                                                                                                                                                                                                                                                                                                                                                 | -                                                                                                                                                                                                                                                                                                                                                                                                                                                                                                                                          | -                                | C_uahsh_01899_mRNA_3.1       | -                              |
| GF0041938 | 0                             | 1                         | 1                           | 0 Hypothetical protein (1)                      | -                                                                                                                                                                                                                                                                                                                                                                                                                                                                                                                                                 | -                                                                                                                                                                                                                                                                                                                                                                                                                                                                                                                                          | -                                | C_uahsh_01899_mRNA_2.1       | -                              |
| GF0041937 | 0                             | 1                         | 1                           | 0 Caffeic acid O-methyltransferase (1)          | O-methyltransferase activity [GO:0008171 molecular_function] (1); protein dimerization activity [GO:0004983 molecular_function] (1); methyltransferase activity [GO:0008168 molecular_function] (1)                                                                                                                                                                                                                                                                                                                                               | Plant methyltransferase dimerization [IPR012967] (1); O-methyltransferase COMT-type [IPR016641] (1); O-methyltransferase, family 2 [IPR001077] (1); Winged helix-turn-helix DNA-binding domain [IPR011991] (1); S-adenosyl-L-methionine-dependent methyltransferase [IPR029663] (1)                                                                                                                                                                                                                                                        | -                                | C_uahsh_01897_mRNA_1.1       | -                              |
| GF0041936 | 0                             | 1                         | 1                           | 0 Hypothetical protein (1)                      | -                                                                                                                                                                                                                                                                                                                                                                                                                                                                                                                                                 | -                                                                                                                                                                                                                                                                                                                                                                                                                                                                                                                                          | -                                | C_uahsh_01894_mRNA_2.1       | -                              |
| GF0041935 | 0                             | 1                         | 1                           | 0 Hypothetical protein (1)                      | -                                                                                                                                                                                                                                                                                                                                                                                                                                                                                                                                                 | -                                                                                                                                                                                                                                                                                                                                                                                                                                                                                                                                          | -                                | C_uahsh_01894_mRNA_1.1       | -                              |
| GF0041934 | 0                             | 1                         | 1                           | 0 Hypothetical protein (1)                      | -                                                                                                                                                                                                                                                                                                                                                                                                                                                                                                                                                 | -                                                                                                                                                                                                                                                                                                                                                                                                                                                                                                                                          | -                                | C_uahsh_01893_mRNA_5.1       | -                              |
| GF0041933 | 0                             | 1                         | 1                           | 0 Hypothetical protein (1)                      | -                                                                                                                                                                                                                                                                                                                                                                                                                                                                                                                                                 | -                                                                                                                                                                                                                                                                                                                                                                                                                                                                                                                                          | -                                | C_uahsh_01893_mRNA_3.1       | -                              |
| GF0041932 | 0                             | 1                         | 1                           | 0 Hypothetical protein (1)                      | -                                                                                                                                                                                                                                                                                                                                                                                                                                                                                                                                                 | -                                                                                                                                                                                                                                                                                                                                                                                                                                                                                                                                          | -                                | C_uahsh_01893_mRNA_15.1      | -                              |
| GF0041931 | 0                             | 1                         | 1                           | 0 Putative nitronate monooxygenase (1)          | nitronate monooxygenase activity [GO:0018580 molecular_function] (1); oxidation-reduction process [GO:0055114 biological_process] (1); catalytic activity [GO:0003824 molecular_function] (1)                                                                                                                                                                                                                                                                                                                                                     | Nitronate monooxygenase [IPR004136] (1); Alcohol-type TIM barrel [IPR013785] (1)                                                                                                                                                                                                                                                                                                                                                                                                                                                           | -                                | C_uahsh_01891_mRNA_2.1       | -                              |
| GF0041930 | 0                             | 1                         | 1                           | 0 Hypothetical protein (1)                      | nucleic acid binding [GO:0003676 molecular_function] (1)                                                                                                                                                                                                                                                                                                                                                                                                                                                                                          | Pw1 domain [IPR003165] (1); Argonate linker 2 domain [IPR023272] (1); Ribonuclease H-like domain [IPR012337] (1); Argonate, linker 1 domain [IPR014811] (1)                                                                                                                                                                                                                                                                                                                                                                                | -                                | C_uahsh_01889_mRNA_6.1       | -                              |
| GF0041929 | 0                             | 1                         | 1                           | 0 Hypothetical protein (1)                      | -                                                                                                                                                                                                                                                                                                                                                                                                                                                                                                                                                 | -                                                                                                                                                                                                                                                                                                                                                                                                                                                                                                                                          | -                                | C_uahsh_01888_mRNA_1.1       | -                              |
| GF0041928 | 0                             | 1                         | 1                           | 0 Hypothetical protein (1)                      | hydrolase activity [GO:0016787 molecular_function] (1); isopentenyl-diphosphate delta-isomerase activity [GO:0004452 molecular_function] (1); isoprenoid biosynthetic process [GO:0008299 biological_process] (1)                                                                                                                                                                                                                                                                                                                                 | NUDX hydrolase domain-like [IPR015791] (1); Isoprenoid-diphosphate-delta-isomerase, type 1 [IPR011876] (1)                                                                                                                                                                                                                                                                                                                                                                                                                                 | -                                | C_uahsh_01887_mRNA_7.1       | -                              |
| GF0041927 | 0                             | 1                         | 1                           | 0 Hypothetical protein (1)                      | protein binding [GO:0005515 molecular_function] (1); binding [GO:0005488 molecular_function] (1)                                                                                                                                                                                                                                                                                                                                                                                                                                                  | MIF4C-like domain [IPR016021] (1); Aramid-like fold [IPR016024] (1); W2 domain [IPR003307] (1)                                                                                                                                                                                                                                                                                                                                                                                                                                             | -                                | C_uahsh_01887_mRNA_6.1       | -                              |
| GF0041926 | 0                             | 1                         | 1                           | 0 Hypothetical protein (1)                      | -                                                                                                                                                                                                                                                                                                                                                                                                                                                                                                                                                 | -                                                                                                                                                                                                                                                                                                                                                                                                                                                                                                                                          | -                                | C_uahsh_01883_mRNA_5.1       | -                              |
| GF0041925 | 0                             | 1                         | 1                           | 0 Hypothetical protein (1)                      | -                                                                                                                                                                                                                                                                                                                                                                                                                                                                                                                                                 | -                                                                                                                                                                                                                                                                                                                                                                                                                                                                                                                                          | -                                | C_uahsh_01883_mRNA_4.1       | -                              |
| GF0041924 | 0                             | 1                         | 1                           | 0 Hypothetical protein (1)                      | -                                                                                                                                                                                                                                                                                                                                                                                                                                                                                                                                                 | -                                                                                                                                                                                                                                                                                                                                                                                                                                                                                                                                          | -                                | C_uahsh_01883_mRNA_2.1       | -                              |
| GF0041923 | 0                             | 1                         | 1                           | 0 Aldehyde oxidase (1)                          | catalytic activity [GO:0003824 molecular_function] (1); oxidoreductase activity, acting on CH-OH group of donors [GO:0101614 molecular_function] (1); electron carrier activity [GO:0009055 molecular_function] (1); metal ion binding [GO:0046572 molecular_function] (1); non-sulfur cluster binding [GO:0051536 molecular_function] (1); flavin adenine dinucleotide binding [GO:0050660 molecular_function] (1); oxidoreductase activity [GO:0001649 molecular_function] (1); oxidation-reduction process [GO:0055114 biological_process] (1) | Molybdopterin dehydrogenase, FAD-binding [IPR002560] (1); Aldehyde oxidase/xanthine dehydrogenase, alpha hammerhead [IPR000674] (1); Aldehyde oxidase/xanthine dehydrogenase, molybdopterin binding [IPR008274] (1); Beta-grip domain [IPR016575] (1); FAD-binding, type 2 [IPR016160] (1); CO dehydrogenase, flavoprotein, C-terminal [IPR001077] (1); [2Fe-2S ferredoxin-type iron-sulfur binding domain [IPR001841] (1); [2Fe-2S]-binding [IPR002888] (1); CO dehydrogenase flavoprotein-like, FAD-binding, subdomain 2 [IPR016169] (1) | -                                | C_uahsh_01882_mRNA_3.1       | -                              |
| GF0041922 | 0                             | 1                         | 1                           | 0 Hypothetical protein (1)                      | -                                                                                                                                                                                                                                                                                                                                                                                                                                                                                                                                                 | -                                                                                                                                                                                                                                                                                                                                                                                                                                                                                                                                          | -                                | C_uahsh_01881_mRNA_6.1       | -                              |
| GF0041921 | 0                             | 1                         | 1                           | 0 Cytoskeleton chaperone 5-mono-phosphatase (1) | -                                                                                                                                                                                                                                                                                                                                                                                                                                                                                                                                                 | -                                                                                                                                                                                                                                                                                                                                                                                                                                                                                                                                          | -                                | C_uahsh_01881_mRNA_4.1       | -                              |
| GF0041920 | 0                             | 1                         | 1                           | 0 Hypothetical protein (1)                      | -                                                                                                                                                                                                                                                                                                                                                                                                                                                                                                                                                 | -                                                                                                                                                                                                                                                                                                                                                                                                                                                                                                                                          | -                                | C_uahsh_01880_mRNA_3.1       | -                              |
| GF0041919 | 0                             | 1                         | 1                           | 0 Hypothetical protein (1)                      | -                                                                                                                                                                                                                                                                                                                                                                                                                                                                                                                                                 | -                                                                                                                                                                                                                                                                                                                                                                                                                                                                                                                                          | -                                | C_uahsh_01880_mRNA_2.1       | -                              |
| GF0041918 | 0                             | 1                         | 1                           | 0 Hypothetical protein (1)                      | -                                                                                                                                                                                                                                                                                                                                                                                                                                                                                                                                                 | -                                                                                                                                                                                                                                                                                                                                                                                                                                                                                                                                          | -                                | C_uahsh_01880_mRNA_1.1       | -                              |
| GF0041917 | 0                             | 1                         | 1                           | 0 Putative rRNA methyltransferase (1)           | nucleus [GO:0005634 cellular_component] (1); rRNA methylation [GO:0003167 biological_process] (1); rRNA processing [GO:0006564 biological_process] (1); methyltransferase activity [GO:0008168 molecular_function] (1); rRNA methylation [GO:0005158 biological_process] (1); rRNA methyltransferase activity [GO:0006649 molecular_function] (1)                                                                                                                                                                                                 | Ribosomal RNA methyltransferase, Spb1, C-terminal [IPR012920] (1); AdoMet-dependent RNA methyltransferase, Spb1 [IPR028889] (1); Ribosomal RNA large subunit methyltransferase 4 [IPR015907] (1); Ribosomal RNA methyltransferase Spb1, domain of unknown function DR13381 [IPR024576] (1)                                                                                                                                                                                                                                                 | -                                | C_uahsh_01870_mRNA_6.1       | -                              |
| GF0041916 | 0                             | 1                         | 1                           | 0 Hypothetical protein (1)                      | terpene synthase activity [GO:0010333 molecular_function] (1); base activity [GO:0010829 molecular_function] (1); magnesium ion binding [GO:0000287 molecular_function] (1); metabolic process [GO:0008152 biological_process] (1); zinc ion binding [GO:0008270 molecular_function] (1); nucleic acid binding [GO:0003676 molecular_function] (1)                                                                                                                                                                                                | Terpenoid cyclase-protein [IPR019601] (1); Terpene synthase, metal-binding domain [IPR005630] (1); Ubiquitin-related domain [IPR020971] (1); IIRX domain [IPR01012] (1); Isoenzyme synthase domain [IPR008949] (1)                                                                                                                                                                                                                                                                                                                         | -                                | C_uahsh_01878_mRNA_3.1       | -                              |
| GF0041915 | 0                             | 1                         | 1                           | 0 Hypothetical protein (1)                      | -                                                                                                                                                                                                                                                                                                                                                                                                                                                                                                                                                 | -                                                                                                                                                                                                                                                                                                                                                                                                                                                                                                                                          | -                                | C_uahsh_01877_mRNA_6.1       | -                              |
| GF0041914 | 0                             | 1                         | 1                           | 0 Hypothetical protein (1)                      | -                                                                                                                                                                                                                                                                                                                                                                                                                                                                                                                                                 | -                                                                                                                                                                                                                                                                                                                                                                                                                                                                                                                                          | -                                | C_uahsh_01877_mRNA_5.1       | -                              |
| GF0041913 | 0                             | 1                         | 1                           | 0 Hypothetical protein (1)                      | -                                                                                                                                                                                                                                                                                                                                                                                                                                                                                                                                                 | -                                                                                                                                                                                                                                                                                                                                                                                                                                                                                                                                          | -                                | C_uahsh_01877_mRNA_4.1       | -                              |
| GF0041912 | 0                             | 1                         | 1                           | 0 Hypothetical protein (1)                      | -                                                                                                                                                                                                                                                                                                                                                                                                                                                                                                                                                 | -                                                                                                                                                                                                                                                                                                                                                                                                                                                                                                                                          | -                                | C_uahsh_01877_mRNA_3.1       | -                              |
| GF0041911 | 0                             | 1                         | 1                           | 0 Ankyrin repeat family protein, putative (1)   | protein binding [GO:0005515 molecular_function] (1)                                                                                                                                                                                                                                                                                                                                                                                                                                                                                               | Ankyrin repeat [IPR002110] (1); PGD domain [IPR020990] (1); Ankyrin repeat-containing domain [IPR000851] (1)                                                                                                                                                                                                                                                                                                                                                                                                                               | -                                | C_uahsh_01876_mRNA_1.1       | -                              |
| GF0041910 | 0                             | 1                         | 1                           | 0 Hypothetical protein (1)                      | -                                                                                                                                                                                                                                                                                                                                                                                                                                                                                                                                                 | -                                                                                                                                                                                                                                                                                                                                                                                                                                                                                                                                          | -                                | C_uahsh_01874_mRNA_1.1       | -                              |
| GF0041909 | 0                             | 1                         | 1                           | 0 Hypothetical protein (1)                      | ubiquitin-dependent protein catabolic process [GO:0006511 biological_process] (1)                                                                                                                                                                                                                                                                                                                                                                                                                                                                 | SUP1 component, dimerization [IPR016072] (1)                                                                                                                                                                                                                                                                                                                                                                                                                                                                                               | -                                | C_uahsh_01873_mRNA_8.1       | -                              |
| GF0041908 | 0                             | 1                         | 1                           | 0 Hypothetical protein (1)                      | -                                                                                                                                                                                                                                                                                                                                                                                                                                                                                                                                                 | -                                                                                                                                                                                                                                                                                                                                                                                                                                                                                                                                          | -                                | C_uahsh_01873_mRNA_6.1       | -                              |
| GF0041907 | 0                             | 1                         | 1                           | 0 Hypothetical protein (1)                      | -                                                                                                                                                                                                                                                                                                                                                                                                                                                                                                                                                 | -                                                                                                                                                                                                                                                                                                                                                                                                                                                                                                                                          | -                                | C_uahsh_01873_mRNA_5.1       | -                              |
| GF0041906 | 0                             | 1                         | 1                           | 0 Hypothetical protein (1)                      | -                                                                                                                                                                                                                                                                                                                                                                                                                                                                                                                                                 | -                                                                                                                                                                                                                                                                                                                                                                                                                                                                                                                                          | -                                | C_uahsh_01873_mRNA_3.1       | -                              |
| GF0041905 | 0                             | 1                         | 1                           | 0 Hypothetical protein (1)                      | -                                                                                                                                                                                                                                                                                                                                                                                                                                                                                                                                                 | -                                                                                                                                                                                                                                                                                                                                                                                                                                                                                                                                          | -                                | C_uahsh_01873_mRNA_2.1       | -                              |
| GF0041904 | 0                             | 1                         | 1                           | 0 Hypothetical protein (1)                      | -                                                                                                                                                                                                                                                                                                                                                                                                                                                                                                                                                 | -                                                                                                                                                                                                                                                                                                                                                                                                                                                                                                                                          | -                                | C_uahsh_01873_mRNA_1.1       | -                              |
| GF0041903 | 0                             | 1                         | 1                           | 0 Hypothetical protein (1)                      | -                                                                                                                                                                                                                                                                                                                                                                                                                                                                                                                                                 | -                                                                                                                                                                                                                                                                                                                                                                                                                                                                                                                                          | -                                | C_uahsh_01872_mRNA_6.1       | -                              |
| GF0041902 | 0                             | 1                         | 1                           | 0 Hypothetical protein (1)                      | proteolysis [GO:0006508 biological_process] (1); aspartic-type endopeptidase activity [GO:0004190 molecular_function] (1)                                                                                                                                                                                                                                                                                                                                                                                                                         | Aspartic peptidase domain [IPR021109] (1); Retropain [IPR018061] (1); Aspartic peptidase, active site [IPR001969] (1)                                                                                                                                                                                                                                                                                                                                                                                                                      | -                                | C_uahsh_01871_mRNA_5.1       | -                              |
| GF0041901 | 0                             | 1                         | 1                           | 0 Caffeic acid 3-O-methyltransferase (1)        | methyltransferase activity [GO:0008168 molecular_function] (1); protein dimerization activity [GO:0004983 molecular_function] (1); O-methyltransferase activity [GO:0008171 molecular_function] (1)                                                                                                                                                                                                                                                                                                                                               | O-methyltransferase COMT-type [IPR016641] (1); Plant methyltransferase dimerization [IPR012967] (1); Winged helix-turn-helix DNA-binding domain [IPR011991] (1); O-methyltransferase, family 2 [IPR001077] (1); S-adenosyl-L-methionine-dependent methyltransferase [IPR029663] (1)                                                                                                                                                                                                                                                        | -                                | C_uahsh_01871_mRNA_1.1       | -                              |
| GF0041900 | 0                             | 1                         | 1                           | 0 Hypothetical protein (1)                      | -                                                                                                                                                                                                                                                                                                                                                                                                                                                                                                                                                 | -                                                                                                                                                                                                                                                                                                                                                                                                                                                                                                                                          | -                                | C_uahsh_01870_mRNA_6.1       | -                              |
| GF0041899 | 0                             | 1                         | 1                           | 0_LRR receptor-like kinase family protein (1)   | protein kinase activity [GO:0004672 molecular_function] (1); protein phosphorylation [GO:0006468 biological_process] (1); protein binding [GO:0005515 molecular_function] (1)                                                                                                                                                                                                                                                                                                                                                                     | Serine-threonine tyrosine protein kinase catalytic domain [IPR012451] (1); Leucine-rich repeat [IPR01011] (1); Leucine-rich repeat-containing N-terminal, plant-type [IPR013210] (1); Concavalin A-like lectin/ghannase domain [IPR01320] (1); Leucine-rich repeat, typical subtype [IPR003591] (1); Protein kinase-like domain [IPR011009] (1); Leucine-rich repeat domain, L domain-like [IPR023275] (1)                                                                                                                                 | -                                | C_uahsh_01869_mRNA_6.1       | -                              |
| GF0041898 | 0                             | 1                         | 1                           | 0 Hypothetical protein (1)                      | -                                                                                                                                                                                                                                                                                                                                                                                                                                                                                                                                                 | -                                                                                                                                                                                                                                                                                                                                                                                                                                                                                                                                          | -                                | C_uahsh_01869_mRNA_5.1       | -                              |
| GF0041897 | 0                             | 1                         | 1                           | 0 Hypothetical protein (1)                      | -                                                                                                                                                                                                                                                                                                                                                                                                                                                                                                                                                 | -                                                                                                                                                                                                                                                                                                                                                                                                                                                                                                                                          | -                                | C_uahsh_01867_mRNA_7.1       | -                              |
| GF0041896 | 0                             | 1                         | 1                           | 0 Hypothetical protein (1)                      | -                                                                                                                                                                                                                                                                                                                                                                                                                                                                                                                                                 | -                                                                                                                                                                                                                                                                                                                                                                                                                                                                                                                                          | -                                | C_uahsh_01867_mRNA_6.1       | -                              |
| GF0041895 | 0                             | 1                         | 1                           | 0 Hypothetical protein (1)                      | -                                                                                                                                                                                                                                                                                                                                                                                                                                                                                                                                                 | -                                                                                                                                                                                                                                                                                                                                                                                                                                                                                                                                          | -                                | C_uahsh_01867_mRNA_5.1       | -                              |
| GF0041894 | 0                             | 1                         | 1                           | 0 Hypothetical protein (1)                      | -                                                                                                                                                                                                                                                                                                                                                                                                                                                                                                                                                 | -                                                                                                                                                                                                                                                                                                                                                                                                                                                                                                                                          | -                                | C_uahsh_01867_mRNA_3.1       | -                              |

| ID        | Num. in <i>C. crottensteini</i> | Num. in <i>C. auris</i> | Num. in <i>P. putidus</i> | Note                                                                                    | GO                                                                                                                                                                                                                                                                  | InterPro                                                                                                                                                                                                                                                                                                                                                                                                                                                                                                                    | Members in <i>C. crottensteini</i> | Members in <i>C. auris</i> | Members in <i>P. putidus</i> |
|-----------|---------------------------------|-------------------------|---------------------------|-----------------------------------------------------------------------------------------|---------------------------------------------------------------------------------------------------------------------------------------------------------------------------------------------------------------------------------------------------------------------|-----------------------------------------------------------------------------------------------------------------------------------------------------------------------------------------------------------------------------------------------------------------------------------------------------------------------------------------------------------------------------------------------------------------------------------------------------------------------------------------------------------------------------|------------------------------------|----------------------------|------------------------------|
| GF0041893 | 0                               | 1                       | 0                         | Hypothetical protein (1)                                                                | zinc ion binding [GO:0008270 molecular_function] (1); nucleic acid binding [GO:0003676 molecular_function] (1)                                                                                                                                                      | Retroransposon gag domain [IPRO05162] (1); Zinc finger, CCHC-type-1 [IPRO01878] (1)                                                                                                                                                                                                                                                                                                                                                                                                                                         | -                                  | C_unihub_01867_mRNA_2,1    | -                            |
| GF0041892 | 0                               | 1                       | 0                         | Gag protease polyprotein (1)                                                            | -                                                                                                                                                                                                                                                                   | -                                                                                                                                                                                                                                                                                                                                                                                                                                                                                                                           | -                                  | C_unihub_01866_mRNA_8,1    | -                            |
| GF0041891 | 0                               | 1                       | 0                         | Hypothetical protein (1)                                                                | GTP binding [GO:0005525 molecular_function] (1)                                                                                                                                                                                                                     | AGI-type guanine nucleotide-binding (G) domain [IPRO06703] (1); P-loop containing nucleoside triphosphate hydrolase [IPRO27417] (1)                                                                                                                                                                                                                                                                                                                                                                                         | -                                  | C_unihub_01866_mRNA_5,1    | -                            |
| GF0041890 | 0                               | 1                       | 0                         | Hypothetical protein (1)                                                                | GTP binding [GO:0005525 molecular_function] (1)                                                                                                                                                                                                                     | AGI-type guanine nucleotide-binding (G) domain [IPRO06703] (1); P-loop containing nucleoside triphosphate hydrolase [IPRO27417] (1)                                                                                                                                                                                                                                                                                                                                                                                         | -                                  | C_unihub_01866_mRNA_4,1    | -                            |
| GF0041889 | 0                               | 1                       | 0                         | Hypothetical protein (1)                                                                | GTP binding [GO:0005525 molecular_function] (1)                                                                                                                                                                                                                     | P-loop containing nucleoside triphosphate hydrolase [IPRO27417] (1); AGI-type guanine nucleotide-binding (G) domain [IPRO06703] (1)                                                                                                                                                                                                                                                                                                                                                                                         | -                                  | C_unihub_01866_mRNA_2,1    | -                            |
| GF0041888 | 0                               | 1                       | 0                         | Hypothetical protein (1)                                                                | oxidation-reduction process [GO:0005514 biological_process] (1); protein-disulfide reductase activity [GO:0047134 molecular_function] (1)                                                                                                                           | C1-like [IPRO11424] (1)                                                                                                                                                                                                                                                                                                                                                                                                                                                                                                     | -                                  | C_unihub_01866_mRNA_1,1    | -                            |
| GF0041887 | 0                               | 1                       | 0                         | Cysteine histidine-rich C1 domain protein (1)                                           | -                                                                                                                                                                                                                                                                   | -                                                                                                                                                                                                                                                                                                                                                                                                                                                                                                                           | -                                  | C_unihub_01865_mRNA_5,1    | -                            |
| GF0041886 | 0                               | 1                       | 0                         | Hypothetical protein (1)                                                                | -                                                                                                                                                                                                                                                                   | -                                                                                                                                                                                                                                                                                                                                                                                                                                                                                                                           | -                                  | C_unihub_01864_mRNA_6,1    | -                            |
| GF0041885 | 0                               | 1                       | 0                         | Disease resistance RPS5-like protein (1)                                                | ADP binding [GO:0043531 molecular_function] (1)                                                                                                                                                                                                                     | NB-ARC [IPRO02182] (1); P-loop containing nucleoside triphosphate hydrolase [IPRO27417] (1)                                                                                                                                                                                                                                                                                                                                                                                                                                 | -                                  | C_unihub_01864_mRNA_5,1    | -                            |
| GF0041884 | 0                               | 1                       | 0                         | Hypothetical protein (1)                                                                | -                                                                                                                                                                                                                                                                   | -                                                                                                                                                                                                                                                                                                                                                                                                                                                                                                                           | -                                  | C_unihub_01864_mRNA_4,1    | -                            |
| GF0041883 | 0                               | 1                       | 0                         | Phosphoprotein phosphatase (1)                                                          | binding [GO:0005488 molecular_function] (1)                                                                                                                                                                                                                         | Leucine-rich repeat domain, L domain-like [IPRO032675] (1); Armadillo-like helical [IPRO1989] (1); Armadillo-type fold [IPRO16024] (1)                                                                                                                                                                                                                                                                                                                                                                                      | -                                  | C_unihub_01864_mRNA_3,1    | -                            |
| GF0041882 | 0                               | 1                       | 0                         | Hypothetical protein (1)                                                                | -                                                                                                                                                                                                                                                                   | -                                                                                                                                                                                                                                                                                                                                                                                                                                                                                                                           | -                                  | C_unihub_01862_mRNA_7,1    | -                            |
| GF0041881 | 0                               | 1                       | 0                         | Hypothetical protein (1)                                                                | -                                                                                                                                                                                                                                                                   | Alpha crystallin Hsp20 domain [IPRO02068] (1); HSP20-like chaperone [IPRO08978] (4)                                                                                                                                                                                                                                                                                                                                                                                                                                         | -                                  | C_unihub_01860_mRNA_6,1    | -                            |
| GF0041880 | 0                               | 1                       | 0                         | Hypothetical protein (1)                                                                | -                                                                                                                                                                                                                                                                   | HSP70-like chaperone [IPRO08978] (1); Alpha crystallin Hsp20 domain [IPRO02068] (1)                                                                                                                                                                                                                                                                                                                                                                                                                                         | -                                  | C_unihub_01860_mRNA_5,1    | -                            |
| GF0041879 | 0                               | 1                       | 0                         | Hypothetical protein (1)                                                                | -                                                                                                                                                                                                                                                                   | Reverse transcriptase, RNA-dependent DNA polymerase [IPRO013103] (1)                                                                                                                                                                                                                                                                                                                                                                                                                                                        | -                                  | C_unihub_01860_mRNA_2,1    | -                            |
| GF0041878 | 0                               | 1                       | 0                         | Hypothetical protein (1)                                                                | -                                                                                                                                                                                                                                                                   | -                                                                                                                                                                                                                                                                                                                                                                                                                                                                                                                           | -                                  | C_unihub_01860_mRNA_1,1    | -                            |
| GF0041877 | 0                               | 1                       | 0                         | Hypothetical protein (1)                                                                | -                                                                                                                                                                                                                                                                   | -                                                                                                                                                                                                                                                                                                                                                                                                                                                                                                                           | -                                  | C_unihub_01859_mRNA_5,1    | -                            |
| GF0041876 | 0                               | 1                       | 0                         | Hypothetical protein (1)                                                                | -                                                                                                                                                                                                                                                                   | -                                                                                                                                                                                                                                                                                                                                                                                                                                                                                                                           | -                                  | C_unihub_01858_mRNA_3,1    | -                            |
| GF0041875 | 0                               | 1                       | 0                         | LRR receptor-like serine/threonine-protein kinase GS01 (1)                              | protein binding [GO:0005515 molecular_function] (1)                                                                                                                                                                                                                 | Leucine-rich repeat-containing N-terminal, plant-type [IPRO1210] (1); Leucine-rich repeat [IPRO01611] (1); Leucine-rich repeat, typical subtype [IPRO03191] (1); Leucine-rich repeat domain, L domain-like [IPRO032675] (1); Pyridoxal phosphate-dependent transaminase, major region, subdomain 1 [IPRO15421] (1); Pyridoxal phosphate-dependent transferase [IPRO15424] (1); Acetaminofenase class V domain [IPRO00192] (1)                                                                                               | -                                  | C_unihub_01857_mRNA_5,1    | -                            |
| GF0041874 | 0                               | 1                       | 0                         | Hypothetical protein (1)                                                                | catalytic activity [GO:0003824 molecular_function] (1)                                                                                                                                                                                                              | Pyridoxal phosphate-dependent transaminase, major region, subdomain 1 [IPRO15421] (1); Pyridoxal phosphate-dependent transferase [IPRO15424] (1)                                                                                                                                                                                                                                                                                                                                                                            | -                                  | C_unihub_01857_mRNA_4,1    | -                            |
| GF0041873 | 0                               | 1                       | 0                         | Hypothetical protein (1)                                                                | catalytic activity [GO:0003824 molecular_function] (1)                                                                                                                                                                                                              | Pyridoxal phosphate-dependent transaminase, major region, subdomain 1 [IPRO15421] (1); Pyridoxal phosphate-dependent transferase [IPRO15424] (1)                                                                                                                                                                                                                                                                                                                                                                            | -                                  | C_unihub_01857_mRNA_3,1    | -                            |
| GF0041872 | 0                               | 1                       | 0                         | Hypothetical protein (1)                                                                | catalytic activity [GO:0003824 molecular_function] (1); DNA integration [GO:001574 biological_process] (1); nucleic acid binding [GO:0003676 molecular_function] (1)                                                                                                | Ribonuclease H-like domain [IPRO12337] (1); Integrase catalytic core [IPRO1584] (1); Pyridoxal phosphate-dependent transaminase, major region, subdomain 1 [IPRO15421] (1); Acetaminofenase class V domain [IPRO00192] (1); GAG-protease domain [IPRO02524] (1); Pyridoxal phosphate-dependent transferase [IPRO15424] (1)                                                                                                                                                                                                  | -                                  | C_unihub_01857_mRNA_12,1   | -                            |
| GF0041871 | 0                               | 1                       | 0                         | Aspartic proteinase (1)                                                                 | aspartic-type endopeptidase activity [GO:0004190 molecular_function] (1); lipid metabolic process [GO:0006629 biological_process] (1); oxidoreductase activity [GO:000508 biological_process] (1)                                                                   | Sapoin-like type B, region 1 [IPRO07856] (1); Aspartic proteinase, active site [IPRO01969] (1); Sapoin-like [IPRO11001] (1); Aspartic peptidase A1 family [IPRO031] (1); Papain-like family A1 domain [IPRO03121] (1); Aspartic peptidase domain [IPRO02109] (1); Sapoin B type, region 2 [IPRO0818] (1); Sapoin B type domain [IPRO08139] (1)                                                                                                                                                                              | -                                  | C_unihub_01855_mRNA_1,1    | -                            |
| GF0041870 | 0                               | 1                       | 0                         | Hypothetical protein (1)                                                                | -                                                                                                                                                                                                                                                                   | -                                                                                                                                                                                                                                                                                                                                                                                                                                                                                                                           | -                                  | C_unihub_01855_mRNA_2,1    | -                            |
| GF0041869 | 0                               | 1                       | 0                         | Hypothetical protein (1)                                                                | -                                                                                                                                                                                                                                                                   | -                                                                                                                                                                                                                                                                                                                                                                                                                                                                                                                           | -                                  | C_unihub_01855_mRNA_1,1    | -                            |
| GF0041868 | 0                               | 1                       | 0                         | Hypothetical protein (1)                                                                | -                                                                                                                                                                                                                                                                   | -                                                                                                                                                                                                                                                                                                                                                                                                                                                                                                                           | -                                  | C_unihub_01855_mRNA_3,1    | -                            |
| GF0041867 | 0                               | 1                       | 0                         | Hypothetical protein (1)                                                                | -                                                                                                                                                                                                                                                                   | -                                                                                                                                                                                                                                                                                                                                                                                                                                                                                                                           | -                                  | C_unihub_01855_mRNA_2,1    | -                            |
| GF0041866 | 0                               | 1                       | 0                         | Hypothetical protein (1)                                                                | -                                                                                                                                                                                                                                                                   | -                                                                                                                                                                                                                                                                                                                                                                                                                                                                                                                           | -                                  | C_unihub_01855_mRNA_1,1    | -                            |
| GF0041865 | 0                               | 1                       | 0                         | Hypothetical protein (1)                                                                | protein binding [GO:0005515 molecular_function] (1)                                                                                                                                                                                                                 | Ankyrin repeat-containing domain [IPRO21063] (1); Ankyrin repeat [IPRO02110] (4)                                                                                                                                                                                                                                                                                                                                                                                                                                            | -                                  | C_unihub_01854_mRNA_7,1    | -                            |
| GF0041864 | 0                               | 1                       | 0                         | Hypothetical protein (1)                                                                | -                                                                                                                                                                                                                                                                   | -                                                                                                                                                                                                                                                                                                                                                                                                                                                                                                                           | -                                  | C_unihub_01854_mRNA_6,1    | -                            |
| GF0041863 | 0                               | 1                       | 0                         | Hypothetical protein (1)                                                                | protein binding [GO:0005515 molecular_function] (1)                                                                                                                                                                                                                 | Ankyrin repeat-containing domain [IPRO21063] (1)                                                                                                                                                                                                                                                                                                                                                                                                                                                                            | -                                  | C_unihub_01854_mRNA_2,1    | -                            |
| GF0041862 | 0                               | 1                       | 0                         | Phenoxymunster benzylic ether reductase (1)                                             | -                                                                                                                                                                                                                                                                   | PGS domain [IPRO20961] (1); Ankyrin repeat-containing domain [IPRO21063] (1); Ankyrin repeat [IPRO02110] (4)                                                                                                                                                                                                                                                                                                                                                                                                                | -                                  | C_unihub_01853_mRNA_2,1    | -                            |
| GF0041861 | 0                               | 1                       | 0                         | Hypothetical protein (1)                                                                | -                                                                                                                                                                                                                                                                   | NAD(P)-binding domain [IPRO16040] (1); Nucleic acid domain [IPRO08030] (1)                                                                                                                                                                                                                                                                                                                                                                                                                                                  | -                                  | C_unihub_01852_mRNA_2,1    | -                            |
| GF0041860 | 0                               | 1                       | 0                         | Hypothetical protein (1)                                                                | -                                                                                                                                                                                                                                                                   | -                                                                                                                                                                                                                                                                                                                                                                                                                                                                                                                           | -                                  | C_unihub_01852_mRNA_1,1    | -                            |
| GF0041859 | 0                               | 1                       | 0                         | Hypothetical protein (1)                                                                | fatty acid metabolic process [GO:0006631 biological_process] (1); acyl-peptidyl-esterase activity [GO:0004500 molecular_function] (1); oxidation-reduction process [GO:0005514 biological_process] (1); oxidoreductase activity [GO:0001649 molecular_function] (1) | transaminase, major region, subdomain 1 [IPRO15421] (1); Ferritin-like superfamily [IPRO00076] (1); Fatty acid desaturase, type 2 [IPRO05607] (1)                                                                                                                                                                                                                                                                                                                                                                           | -                                  | C_unihub_01851_mRNA_3,1    | -                            |
| GF0041858 | 0                               | 1                       | 0                         | Hypothetical protein (1)                                                                | nucleus [GO:0005624 cellular_component] (1); DNA binding [GO:0003677 molecular_function] (1)                                                                                                                                                                        | Methyl-CpG DNA binding [IPRO01739] (1); DNA-binding domain [IPRO16177] (1)                                                                                                                                                                                                                                                                                                                                                                                                                                                  | -                                  | C_unihub_01851_mRNA_2,1    | -                            |
| GF0041857 | 0                               | 1                       | 0                         | Hypothetical protein (1)                                                                | -                                                                                                                                                                                                                                                                   | -                                                                                                                                                                                                                                                                                                                                                                                                                                                                                                                           | -                                  | C_unihub_01850_mRNA_3,1    | -                            |
| GF0041856 | 0                               | 1                       | 0                         | Hypothetical protein (1)                                                                | -                                                                                                                                                                                                                                                                   | -                                                                                                                                                                                                                                                                                                                                                                                                                                                                                                                           | -                                  | C_unihub_01850_mRNA_2,1    | -                            |
| GF0041855 | 0                               | 1                       | 0                         | C2 calcium/peptide-binding plant phosphotyrosyltransferase family protein isoform 2 (1) | protein binding [GO:0005515 molecular_function] (1)                                                                                                                                                                                                                 | C2 domain [IPRO00008] (1); Phosphotyrosyltransferase C-terminal [IPRO15831] (1)                                                                                                                                                                                                                                                                                                                                                                                                                                             | -                                  | C_unihub_01850_mRNA_1,1    | -                            |
| GF0041854 | 0                               | 1                       | 0                         | LRR receptor-like kinase family protein (1)                                             | ATP binding [GO:0005524 molecular_function] (1); protein kinase activity [GO:0004672 molecular_function] (1); protein phosphorylation [GO:0006468 biological_process] (1); protein binding [GO:0005515 molecular_function] (1)                                      | Protein kinase domain [IPRO00719] (1); Concentratorin A-like lectin/glucanase domain [IPRO13320] (1); Protein kinase-like domain [IPRO11099] (1); Leucine-rich repeat domain, L domain-like [IPRO032675] (1); Serine/threonine dual specificity protein kinase, catalytic domain [IPRO02901] (1); Leucine-rich repeat-containing N-terminal, plant-type [IPRO1210] (1); Protein kinase, ATP binding site [IPRO17441] (1); Serine/threonine-protein kinase, active site [IPRO08271] (4); Leucine-rich repeat [IPRO01611] (1) | -                                  | C_unihub_01849_mRNA_5,1    | -                            |
| GF0041853 | 0                               | 1                       | 0                         | Hypothetical protein (1)                                                                | -                                                                                                                                                                                                                                                                   | -                                                                                                                                                                                                                                                                                                                                                                                                                                                                                                                           | -                                  | C_unihub_01849_mRNA_1,1    | -                            |
| GF0041852 | 0                               | 1                       | 0                         | C1p protease ATP binding subunit (1)                                                    | ATP binding [GO:0005524 molecular_function] (1)                                                                                                                                                                                                                     | C1p-A/B family [IPRO01270] (1); C1p-A/B conserved site 1 [IPRO18568] (1); P-loop containing nucleoside triphosphate hydrolase [IPRO27417] (1); C1p ATPase, C-terminal [IPRO19489] (1); ATPase, AAA-type, core [IPRO00959] (1); AAA-ATPase domain [IPRO03393] (1)                                                                                                                                                                                                                                                            | -                                  | C_unihub_01848_mRNA_7,1    | -                            |
| GF0041851 | 0                               | 1                       | 0                         | Hypothetical protein (1)                                                                | protein binding [GO:0005515 molecular_function] (1)                                                                                                                                                                                                                 | WD40/YVTY repeat-like containing domain [IPRO15843] (1)                                                                                                                                                                                                                                                                                                                                                                                                                                                                     | -                                  | C_unihub_01848_mRNA_1,1    | -                            |
| GF0041850 | 0                               | 1                       | 0                         | Chaperonin CPN60-2 (1)                                                                  | -                                                                                                                                                                                                                                                                   | GroEL-like apical domain [IPRO27409] (1)                                                                                                                                                                                                                                                                                                                                                                                                                                                                                    | -                                  | C_unihub_01847_mRNA_1,1    | -                            |
| GF0041849 | 0                               | 1                       | 0                         | Putative disease resistance protein (1)                                                 | -                                                                                                                                                                                                                                                                   | -                                                                                                                                                                                                                                                                                                                                                                                                                                                                                                                           | -                                  | C_unihub_01846_mRNA_5,1    | -                            |
| GF0041848 | 0                               | 1                       | 0                         | Hypothetical protein (1)                                                                | -                                                                                                                                                                                                                                                                   | -                                                                                                                                                                                                                                                                                                                                                                                                                                                                                                                           | -                                  | C_unihub_01846_mRNA_4,1    | -                            |
| GF0041847 | 0                               | 1                       | 0                         | Phosphoprotein phosphatase (1)                                                          | protein binding [GO:0005515 molecular_function] (1)                                                                                                                                                                                                                 | Leucine-rich repeat domain, L domain-like [IPRO032675] (1); Leucine-rich repeat [IPRO01611] (1)                                                                                                                                                                                                                                                                                                                                                                                                                             | -                                  | C_unihub_01846_mRNA_3,1    | -                            |
| GF0041846 | 0                               | 1                       | 0                         | Hypothetical protein (1)                                                                | -                                                                                                                                                                                                                                                                   | -                                                                                                                                                                                                                                                                                                                                                                                                                                                                                                                           | -                                  | C_unihub_01845_mRNA_1,1    | -                            |
| GF0041845 | 0                               | 1                       | 0                         | Hypothetical protein (1)                                                                | nucleic acid binding [GO:0003676 molecular_function] (1); zinc ion binding [GO:0008270 molecular_function] (1)                                                                                                                                                      | Zinc finger, CCHC-type [IPRO01878] (4)                                                                                                                                                                                                                                                                                                                                                                                                                                                                                      | -                                  | C_unihub_01843_mRNA_4,1    | -                            |
| GF0041844 | 0                               | 1                       | 0                         | Hypothetical protein (1)                                                                | -                                                                                                                                                                                                                                                                   | -                                                                                                                                                                                                                                                                                                                                                                                                                                                                                                                           | -                                  | C_unihub_01843_mRNA_3,1    | -                            |
| GF0041843 | 0                               | 1                       | 0                         | Hypothetical protein (1)                                                                | -                                                                                                                                                                                                                                                                   | -                                                                                                                                                                                                                                                                                                                                                                                                                                                                                                                           | -                                  | C_unihub_01843_mRNA_1,1    | -                            |
| GF0041842 | 0                               | 1                       | 0                         | Hypothetical protein (1)                                                                | -                                                                                                                                                                                                                                                                   | -                                                                                                                                                                                                                                                                                                                                                                                                                                                                                                                           | -                                  | C_unihub_01842_mRNA_2,1    | -                            |
| GF0041841 | 0                               | 1                       | 0                         | Putative non-ATK retroelement reverse transcriptase (1)                                 | -                                                                                                                                                                                                                                                                   | Reverse transcriptase domain [IPRO00477] (1)                                                                                                                                                                                                                                                                                                                                                                                                                                                                                | -                                  | C_unihub_01841_mRNA_5,1    | -                            |
| GF0041840 | 0                               | 1                       | 0                         | Disease resistance protein (1)                                                          | ADP binding [GO:0043531 molecular_function] (1)                                                                                                                                                                                                                     | P-loop containing nucleoside triphosphate hydrolase [IPRO27417] (1); NB-ARC [IPRO02182] (1); Leucine-rich repeat domain, L domain-like [IPRO032675] (1); VQ [IPRO08889] (1)                                                                                                                                                                                                                                                                                                                                                 | -                                  | C_unihub_01841_mRNA_4,1    | -                            |
| GF0041839 | 0                               | 1                       | 0                         | Hypothetical protein (1)                                                                | -                                                                                                                                                                                                                                                                   | -                                                                                                                                                                                                                                                                                                                                                                                                                                                                                                                           | -                                  | C_unihub_01841_mRNA_3,1    | -                            |
| GF0041838 | 0                               | 1                       | 0                         | Hypothetical protein (1)                                                                | -                                                                                                                                                                                                                                                                   | -                                                                                                                                                                                                                                                                                                                                                                                                                                                                                                                           | -                                  | C_unihub_01840_mRNA_7,1    | -                            |
| GF0041837 | 0                               | 1                       | 0                         | Hypothetical protein (1)                                                                | -                                                                                                                                                                                                                                                                   | -                                                                                                                                                                                                                                                                                                                                                                                                                                                                                                                           | -                                  | C_unihub_01840_mRNA_6,1    | -                            |
| GF0041836 | 0                               | 1                       | 0                         | Hypothetical protein (1)                                                                | -                                                                                                                                                                                                                                                                   | -                                                                                                                                                                                                                                                                                                                                                                                                                                                                                                                           | -                                  | C_unihub_01839_mRNA_4,1    | -                            |
| GF0041835 | 0                               | 1                       | 0                         | Hypothetical protein (1)                                                                | -                                                                                                                                                                                                                                                                   | -                                                                                                                                                                                                                                                                                                                                                                                                                                                                                                                           | -                                  | C_unihub_01839_mRNA_2,1    | -                            |
| GF0041834 | 0                               | 1                       | 0                         | Disease resistance protein (1)                                                          | ADP binding [GO:0043531 molecular_function] (1)                                                                                                                                                                                                                     | Leucine-rich repeat domain, L domain-like [IPRO032675] (1); NB-ARC [IPRO02182] (1); P-loop containing nucleoside triphosphate hydrolase [IPRO27417] (4)                                                                                                                                                                                                                                                                                                                                                                     | -                                  | C_unihub_01837_mRNA_2,1    | -                            |

| ID        | Num. in <i>C. crottensteini</i> | Num. in <i>C. caudata</i> | Num. in <i>P. trifidata</i> | Note                                                               | GO                                                                                                                                                                                                                                                                                                                                          | InterPro                                                                                                                                                                                                                                                                              | Members in <i>C. crottensteini</i> | Members in <i>C. caudata</i> | Members in <i>P. trifidata</i> |
|-----------|---------------------------------|---------------------------|-----------------------------|--------------------------------------------------------------------|---------------------------------------------------------------------------------------------------------------------------------------------------------------------------------------------------------------------------------------------------------------------------------------------------------------------------------------------|---------------------------------------------------------------------------------------------------------------------------------------------------------------------------------------------------------------------------------------------------------------------------------------|------------------------------------|------------------------------|--------------------------------|
| GF0041833 | 0                               | 1                         | 0                           | 0 Hexosyltransferase (1)                                           | transferase activity, transferring glycosyl group [GO:0004757] molecular_function (1)                                                                                                                                                                                                                                                       | Nucleotide-diphospho-sugar transferases [IPR020484] (1); Glycosyl transferase, family 8 [IPR020495] (1)                                                                                                                                                                               | -                                  | C_umshii_01837_mRNA_1,1      | -                              |
| GF0041832 | 0                               | 1                         | 0                           | 0 Hypothetical protein (1)                                         | protein serine/threonine kinase activity [GO:000474] molecular_function (1); protein binding [GO:0005515] molecular_function (1)                                                                                                                                                                                                            | WD40/YVTN repeat-like-containing domain [IPR015411] (1); S-box receptor kinase, C-terminal [IPR021820] (1); WD40-repeat-containing domain [IPR017986] (1); Leucine-rich repeat domain, I domain-like [IPR026751] (1); Protein kinase-like domain [IPR011009] (1)                      | -                                  | C_umshii_01836_mRNA_3,1      | -                              |
| GF0041831 | 0                               | 1                         | 0                           | 0 Hypothetical protein (1)                                         | structural constituent of ribosome [GO:000735] molecular_function (1); translation [GO:0006412] biological_process (1); ribosome [GO:0005840] cellular_component (1)                                                                                                                                                                        | Ribosomal protein S11 [IPR001971] (1); Ribosomal S11, conserved site [IPR018102] (4)                                                                                                                                                                                                  | -                                  | C_umshii_01835_mRNA_3,1      | -                              |
| GF0041829 | 0                               | 1                         | 0                           | 0 DNA-directed RNA polymerase, alpha subunit (1)                   | DNA-directed RNA polymerase activity [GO:0046983] molecular_function (1); DNA-directed RNA polymerase activity [GO:0003899] molecular_function (1); transcription, DNA-templated [GO:000631] biological_process (1)                                                                                                                         | DNA-directed RNA polymerase, RBP11-like dimerization domain [IPR009025] (1); DNA-directed RNA polymerase, insert domain [IPR011262] (1); DNA-directed RNA polymerase, structured RNA polymerase [IPR012653] (1)                                                                       | -                                  | C_umshii_01835_mRNA_2,1      | -                              |
| GF0041828 | 0                               | 1                         | 0                           | 0 Hypothetical protein (1)                                         | -                                                                                                                                                                                                                                                                                                                                           | -                                                                                                                                                                                                                                                                                     | -                                  | C_umshii_01835_mRNA_1,1      | -                              |
| GF0041827 | 0                               | 1                         | 0                           | 0 Hypothetical protein (1)                                         | -                                                                                                                                                                                                                                                                                                                                           | -                                                                                                                                                                                                                                                                                     | -                                  | C_umshii_01833_mRNA_5,1      | -                              |
| GF0041826 | 0                               | 1                         | 0                           | 0 Hypothetical protein (1)                                         | -                                                                                                                                                                                                                                                                                                                                           | -                                                                                                                                                                                                                                                                                     | -                                  | C_umshii_01833_mRNA_4,1      | -                              |
| GF0041825 | 0                               | 1                         | 0                           | 0 Hypothetical protein (1)                                         | -                                                                                                                                                                                                                                                                                                                                           | -                                                                                                                                                                                                                                                                                     | -                                  | C_umshii_01833_mRNA_3,1      | -                              |
| GF0041824 | 0                               | 1                         | 0                           | 0 Hypothetical protein (1)                                         | -                                                                                                                                                                                                                                                                                                                                           | -                                                                                                                                                                                                                                                                                     | -                                  | C_umshii_01832_mRNA_2,1      | -                              |
| GF0041823 | 0                               | 1                         | 0                           | 0 Hypothetical protein (1)                                         | -                                                                                                                                                                                                                                                                                                                                           | -                                                                                                                                                                                                                                                                                     | -                                  | C_umshii_01831_mRNA_3,1      | -                              |
| GF0041822 | 0                               | 1                         | 0                           | 0 Pleiotropic drug resistance protein 3 (1)                        | ATP binding [GO:0005524] molecular_function (1); membrane [GO:0016020] cellular_component (1); ATPase activity [GO:0016887] molecular_function (1)                                                                                                                                                                                          | ABC transporter extracellular N-terminal domain [IPR020841] (1); P-loop containing nucleoside triphosphate hydrolase [IPR027471] (4); AAA+ ATPase domain [IPR003951] (1); ABC transporter-like [IPR003439] (1); ABC-2 type transporter [IPR013525] (1)                                | -                                  | C_umshii_01830_mRNA_4,1      | -                              |
| GF0041821 | 0                               | 1                         | 0                           | 0 P-loop nucleoside triphosphate hydrolase superfamily protein (1) | -                                                                                                                                                                                                                                                                                                                                           | -                                                                                                                                                                                                                                                                                     | -                                  | C_umshii_01829_mRNA_7,1      | -                              |
| GF0041820 | 0                               | 1                         | 0                           | 0 Hypothetical protein (1)                                         | -                                                                                                                                                                                                                                                                                                                                           | -                                                                                                                                                                                                                                                                                     | -                                  | C_umshii_01829_mRNA_5,1      | -                              |
| GF0041819 | 0                               | 1                         | 0                           | 0 Hypothetical protein (1)                                         | -                                                                                                                                                                                                                                                                                                                                           | -                                                                                                                                                                                                                                                                                     | -                                  | C_umshii_01829_mRNA_3,1      | -                              |
| GF0041818 | 0                               | 1                         | 0                           | 0 Monosaccharide transport protein (1)                             | -                                                                                                                                                                                                                                                                                                                                           | -                                                                                                                                                                                                                                                                                     | -                                  | C_umshii_01829_mRNA_1,1      | -                              |
| GF0041817 | 0                               | 1                         | 0                           | 0 LBR receptor-like kinase (1)                                     | protein binding [GO:0005515] molecular_function (1)                                                                                                                                                                                                                                                                                         | Leucine-rich repeat domain, I domain-like [IPR026751] (1); Leucine-rich repeat-containing N-terminal, plant-type [IPR013210] (1); Leucine-rich repeat [IPR001611] (4)                                                                                                                 | -                                  | C_umshii_01828_mRNA_6,1      | -                              |
| GF0041816 | 0                               | 1                         | 0                           | 0 Hypothetical protein (1)                                         | -                                                                                                                                                                                                                                                                                                                                           | -                                                                                                                                                                                                                                                                                     | -                                  | C_umshii_01827_mRNA_5,1      | -                              |
| GF0041815 | 0                               | 1                         | 0                           | 0 Hypothetical protein (1)                                         | -                                                                                                                                                                                                                                                                                                                                           | -                                                                                                                                                                                                                                                                                     | -                                  | C_umshii_01827_mRNA_2,1      | -                              |
| GF0041814 | 0                               | 1                         | 0                           | 0 RING-U-box superfamily protein, putative isoform 3 (1)           | ubiquitin-protein transferase activity [GO:0004842] molecular_function (1); protein ubiquitination [GO:0016507] biological_process (1)                                                                                                                                                                                                      | UBR domain [IPR02867] (1); E3 ubiquitin ligase RBR family [IPR031127] (1)                                                                                                                                                                                                             | -                                  | C_umshii_01826_mRNA_4,1      | -                              |
| GF0041813 | 0                               | 1                         | 0                           | 0 Hypothetical protein (1)                                         | -                                                                                                                                                                                                                                                                                                                                           | -                                                                                                                                                                                                                                                                                     | -                                  | C_umshii_01826_mRNA_3,1      | -                              |
| GF0041812 | 0                               | 1                         | 0                           | 0 Hypothetical protein (1)                                         | -                                                                                                                                                                                                                                                                                                                                           | -                                                                                                                                                                                                                                                                                     | -                                  | C_umshii_01825_mRNA_3,1      | -                              |
| GF0041811 | 0                               | 1                         | 0                           | 0 Hypothetical protein (1)                                         | metabolic process [GO:0008152] biological_process (1); base activity [GO:0016289] molecular_function (1); terpene synthase activity [GO:0010333] molecular_function (1)                                                                                                                                                                     | Terpene synthase, N-terminal domain [IPR001960] (1); Terpene cyclase/protein prennyltransferase alpha-alpha torsion [IPR008950] (1)                                                                                                                                                   | -                                  | C_umshii_01825_mRNA_2,1      | -                              |
| GF0041810 | 0                               | 1                         | 0                           | 0 Hypothetical protein (1)                                         | -                                                                                                                                                                                                                                                                                                                                           | -                                                                                                                                                                                                                                                                                     | -                                  | C_umshii_01824_mRNA_2,1      | -                              |
| GF0041809 | 0                               | 1                         | 0                           | 0 Hypothetical protein (1)                                         | -                                                                                                                                                                                                                                                                                                                                           | -                                                                                                                                                                                                                                                                                     | -                                  | C_umshii_01824_mRNA_1,1      | -                              |
| GF0041808 | 0                               | 1                         | 0                           | 0 Hypothetical protein (1)                                         | -                                                                                                                                                                                                                                                                                                                                           | -                                                                                                                                                                                                                                                                                     | -                                  | C_umshii_01823_mRNA_7,1      | -                              |
| GF0041807 | 0                               | 1                         | 0                           | 0 Abhydrolase domain-containing protein (1)                        | -                                                                                                                                                                                                                                                                                                                                           | -                                                                                                                                                                                                                                                                                     | -                                  | C_umshii_01823_mRNA_6,1      | -                              |
| GF0041806 | 0                               | 1                         | 0                           | 0 Hypothetical protein (1)                                         | ATP binding [GO:0005524] molecular_function (1); protein phosphorylation [GO:0006468] biological_process (1); protein kinase activity [GO:0004672] molecular_function (1)                                                                                                                                                                   | Protein kinase domain [IPR000719] (1); Protein kinase-like domain [IPR011009] (1); Concanavalin A-like lectin/peckase domain [IPR013230] (1); Protein kinase, ATP binding site [IPR017441] (4)                                                                                        | -                                  | C_umshii_01821_mRNA_5,1      | -                              |
| GF0041805 | 0                               | 1                         | 0                           | 0 Hypothetical protein (1)                                         | -                                                                                                                                                                                                                                                                                                                                           | -                                                                                                                                                                                                                                                                                     | -                                  | C_umshii_01821_mRNA_2,1      | -                              |
| GF0041804 | 0                               | 1                         | 0                           | 0 Hypothetical protein (1)                                         | -                                                                                                                                                                                                                                                                                                                                           | -                                                                                                                                                                                                                                                                                     | -                                  | C_umshii_01820_mRNA_4,1      | -                              |
| GF0041803 | 0                               | 1                         | 0                           | 0 Hypothetical protein (1)                                         | -                                                                                                                                                                                                                                                                                                                                           | -                                                                                                                                                                                                                                                                                     | -                                  | C_umshii_01820_mRNA_2,1      | -                              |
| GF0041802 | 0                               | 1                         | 0                           | 0 Hypothetical protein (1)                                         | -                                                                                                                                                                                                                                                                                                                                           | -                                                                                                                                                                                                                                                                                     | -                                  | C_umshii_01819_mRNA_3,1      | -                              |
| GF0041801 | 0                               | 1                         | 0                           | 0 Hypothetical protein (1)                                         | -                                                                                                                                                                                                                                                                                                                                           | -                                                                                                                                                                                                                                                                                     | -                                  | C_umshii_01819_mRNA_2,1      | -                              |
| GF0041800 | 0                               | 1                         | 0                           | 0 Hypothetical protein (1)                                         | -                                                                                                                                                                                                                                                                                                                                           | -                                                                                                                                                                                                                                                                                     | -                                  | C_umshii_01819_mRNA_1,1      | -                              |
| GF0041799 | 0                               | 1                         | 0                           | 0 Hypothetical protein (1)                                         | -                                                                                                                                                                                                                                                                                                                                           | -                                                                                                                                                                                                                                                                                     | -                                  | C_umshii_01818_mRNA_1,1      | -                              |
| GF0041798 | 0                               | 1                         | 0                           | 0 Hypothetical protein (1)                                         | -                                                                                                                                                                                                                                                                                                                                           | -                                                                                                                                                                                                                                                                                     | -                                  | C_umshii_01817_mRNA_5,1      | -                              |
| GF0041797 | 0                               | 1                         | 0                           | 0 Hypothetical protein (1)                                         | -                                                                                                                                                                                                                                                                                                                                           | -                                                                                                                                                                                                                                                                                     | -                                  | C_umshii_01817_mRNA_4,1      | -                              |
| GF0041796 | 0                               | 1                         | 0                           | 0 Hypothetical protein (1)                                         | aspartic-type endopeptidase activity [GO:0004190] molecular_function (1); zinc ion binding [GO:0008270] molecular_function (1); proteolysis [GO:0006508] biological_process (1); nucleic acid binding [GO:0003676] molecular_function (1)                                                                                                   | Protein kinase domain [IPR000719] (1); Aspartic peptidase, active site [IPR001960] (1); Peptidase, AZA, retrovirus, catalytic [IPR001955] (1); Retropepsin [IPR018061] (1)                                                                                                            | -                                  | C_umshii_01816_mRNA_2,1      | -                              |
| GF0041795 | 0                               | 1                         | 0                           | 0 Hypothetical protein (1)                                         | nucleic acid binding [GO:0003676] molecular_function (1); proteolysis [GO:0006508] biological_process (1); zinc ion binding [GO:0008270] molecular_function (1); aspartic-type endopeptidase activity [GO:0004190] molecular_function (1)                                                                                                   | Peptidase, AZA, retrovirus, catalytic [IPR001955] (1); Aspartic peptidase, active site [IPR001960] (1); Retropepsin [IPR018061] (1); Zinc finger, CCHC-type [IPR001878] (1)                                                                                                           | -                                  | C_umshii_01816_mRNA_1,1      | -                              |
| GF0041794 | 0                               | 1                         | 0                           | 0 Hypothetical protein (1)                                         | -                                                                                                                                                                                                                                                                                                                                           | -                                                                                                                                                                                                                                                                                     | -                                  | C_umshii_01811_mRNA_7,1      | -                              |
| GF0041793 | 0                               | 1                         | 0                           | 0 Hypothetical protein (1)                                         | -                                                                                                                                                                                                                                                                                                                                           | -                                                                                                                                                                                                                                                                                     | -                                  | C_umshii_01811_mRNA_5,1      | -                              |
| GF0041792 | 0                               | 1                         | 0                           | 0 Hypothetical protein (1)                                         | -                                                                                                                                                                                                                                                                                                                                           | -                                                                                                                                                                                                                                                                                     | -                                  | C_umshii_01811_mRNA_4,1      | -                              |
| GF0041791 | 0                               | 1                         | 0                           | 0 Hypothetical protein (1)                                         | protein kinase activity [GO:0004672] molecular_function (1); protein phosphorylation [GO:0006468] biological_process (1)                                                                                                                                                                                                                    | Protein kinase-like domain [IPR011009] (1); Serine/threonine/tyrosine-protein kinase catalytic domain [IPR012451] (1)                                                                                                                                                                 | -                                  | C_umshii_01811_mRNA_10,1     | -                              |
| GF0041790 | 0                               | 1                         | 0                           | 0 Hypothetical protein (1)                                         | -                                                                                                                                                                                                                                                                                                                                           | -                                                                                                                                                                                                                                                                                     | -                                  | C_umshii_01811_mRNA_1,1      | -                              |
| GF0041789 | 0                               | 1                         | 0                           | 0 Chloroplast thylakoid membrane, putative isoform 3 (1)           | -                                                                                                                                                                                                                                                                                                                                           | -                                                                                                                                                                                                                                                                                     | -                                  | C_umshii_01810_mRNA_9,1      | -                              |
| GF0041788 | 0                               | 1                         | 0                           | 0 Hypothetical protein (1)                                         | -                                                                                                                                                                                                                                                                                                                                           | -                                                                                                                                                                                                                                                                                     | -                                  | C_umshii_01809_mRNA_7,1      | -                              |
| GF0041787 | 0                               | 1                         | 0                           | 0 Hypothetical protein (1)                                         | -                                                                                                                                                                                                                                                                                                                                           | -                                                                                                                                                                                                                                                                                     | -                                  | C_umshii_01809_mRNA_6,1      | -                              |
| GF0041786 | 0                               | 1                         | 0                           | 0 Hypothetical protein (1)                                         | -                                                                                                                                                                                                                                                                                                                                           | -                                                                                                                                                                                                                                                                                     | -                                  | C_umshii_01809_mRNA_5,1      | -                              |
| GF0041785 | 0                               | 1                         | 0                           | 0 Gibberellin receptor GID1, putative (1)                          | hydrolase activity [GO:0016787] molecular_function (1); metabolic process [GO:0008152] biological_process (1)                                                                                                                                                                                                                               | Alpha/beta hydrolase fold [IPR029058] (1); Alpha/beta hydrolase fold-3 [IPR013094] (4)                                                                                                                                                                                                | -                                  | C_umshii_01809_mRNA_2,1      | -                              |
| GF0041784 | 0                               | 1                         | 0                           | 0 Hypothetical protein (1)                                         | -                                                                                                                                                                                                                                                                                                                                           | -                                                                                                                                                                                                                                                                                     | -                                  | C_umshii_01808_mRNA_4,1      | -                              |
| GF0041783 | 0                               | 1                         | 0                           | 0 Hypothetical protein (1)                                         | -                                                                                                                                                                                                                                                                                                                                           | -                                                                                                                                                                                                                                                                                     | -                                  | C_umshii_01807_mRNA_4,1      | -                              |
| GF0041782 | 0                               | 1                         | 0                           | 0 Hypothetical protein (1)                                         | -                                                                                                                                                                                                                                                                                                                                           | -                                                                                                                                                                                                                                                                                     | -                                  | C_umshii_01807_mRNA_3,1      | -                              |
| GF0041781 | 0                               | 1                         | 0                           | 0 Hypothetical protein (1)                                         | -                                                                                                                                                                                                                                                                                                                                           | -                                                                                                                                                                                                                                                                                     | -                                  | C_umshii_01807_mRNA_2,1      | -                              |
| GF0041780 | 0                               | 1                         | 0                           | 0 Hypothetical protein (1)                                         | -                                                                                                                                                                                                                                                                                                                                           | -                                                                                                                                                                                                                                                                                     | -                                  | C_umshii_01807_mRNA_1,1      | -                              |
| GF0041779 | 0                               | 1                         | 0                           | 0 Phosphoprotein phosphatase (1)                                   | -                                                                                                                                                                                                                                                                                                                                           | -                                                                                                                                                                                                                                                                                     | -                                  | C_umshii_01806_mRNA_4,1      | -                              |
| GF0041778 | 0                               | 1                         | 0                           | 0 NADP specific isocitrate dehydrogenase (1)                       | isocitrate dehydrogenase (NADP+) activity [GO:0004050] molecular_function (1); oxidoreductase activity, acting on the CH-OH group of donors, NAD or NADP as acceptor [GO:0016164] molecular_function (1); oxidation-reduction process [GO:0008154] biological_process (1); isocitrate metabolic process [GO:0006102] biological_process (1) | Isopyruvate dehydrogenase-like domain [IPR024084] (1); Isocitrate dehydrogenase NADP-dependent [IPR004790] (1)                                                                                                                                                                        | -                                  | C_umshii_01804_mRNA_1,1      | -                              |
| GF0041777 | 0                               | 1                         | 0                           | 0 Hypothetical protein (1)                                         | proteolysis [GO:0006508] biological_process (1); aspartic-type endopeptidase activity [GO:0004190] molecular_function (1)                                                                                                                                                                                                                   | Peptidase, AZA, retrovirus, catalytic [IPR001955] (1); Reverse transcriptase domain [IPR000477] (1)                                                                                                                                                                                   | -                                  | C_umshii_01803_mRNA_7,1      | -                              |
| GF0041776 | 0                               | 1                         | 0                           | 0 Hypothetical protein (1)                                         | -                                                                                                                                                                                                                                                                                                                                           | -                                                                                                                                                                                                                                                                                     | -                                  | C_umshii_01803_mRNA_6,1      | -                              |
| GF0041775 | 0                               | 1                         | 0                           | 0 Hypothetical protein (1)                                         | -                                                                                                                                                                                                                                                                                                                                           | -                                                                                                                                                                                                                                                                                     | -                                  | C_umshii_01803_mRNA_11,1     | -                              |
| GF0041774 | 0                               | 1                         | 0                           | 0 Transcription factor Pect1 (1)                                   | -                                                                                                                                                                                                                                                                                                                                           | -                                                                                                                                                                                                                                                                                     | -                                  | C_umshii_01802_mRNA_4,1      | -                              |
| GF0041773 | 0                               | 1                         | 0                           | 0 Mitogen-activated protein kinase kinase (1)                      | protein phosphorylation [GO:0006468] biological_process (1); protein kinase activity [GO:0004672] molecular_function (1); ATP binding [GO:0005524] molecular_function (1)                                                                                                                                                                   | Protein kinase-like domain [IPR011009] (1); Protein kinase domain [IPR000719] (1); Serine/threonine/dual specificity protein kinase, catalytic domain [IPR002901] (1); Serine/threonine-protein kinase, active site [IPR008271] (1); Protein kinase, ATP binding site [IPR017441] (4) | -                                  | C_umshii_01802_mRNA_1,1      | -                              |
| GF0041772 | 0                               | 1                         | 0                           | 0 Hypothetical protein (1)                                         | -                                                                                                                                                                                                                                                                                                                                           | -                                                                                                                                                                                                                                                                                     | -                                  | C_umshii_01800_mRNA_1,1      | -                              |
| GF0041771 | 0                               | 1                         | 0                           | 0 Hypothetical protein (1)                                         | transport [GO:0006010] biological_process (1)                                                                                                                                                                                                                                                                                               | Tomoposin, MdDK, plant [IPR004321] (1); Lonigin-like domain [IPR011012] (1)                                                                                                                                                                                                           | -                                  | C_umshii_01799_mRNA_7,1      | -                              |
| GF0041770 | 0                               | 1                         | 0                           | 0 Cofactor CoA O-methyltransferase (1)                             | O-methyltransferase activity [GO:0008171] molecular_function (1)                                                                                                                                                                                                                                                                            | S-adenosyl-L-methionine-dependent methyltransferase [IPR029063] (1); O-methyltransferase, family 3 [IPR002953] (1)                                                                                                                                                                    | -                                  | C_umshii_01799_mRNA_4,1      | -                              |
| GF0041769 | 0                               | 1                         | 0                           | 0 Hypothetical protein (1)                                         | -                                                                                                                                                                                                                                                                                                                                           | -                                                                                                                                                                                                                                                                                     | -                                  | C_umshii_01799_mRNA_3,1      | -                              |
| GF0041768 | 0                               | 1                         | 0                           | 0 Cofactor CoA O-methyltransferase (1)                             | O-methyltransferase activity [GO:0008171] molecular_function (1)                                                                                                                                                                                                                                                                            | S-adenosyl-L-methionine-dependent methyltransferase [IPR029063] (1); O-methyltransferase, family 3 [IPR002953] (1)                                                                                                                                                                    | -                                  | C_umshii_01799_mRNA_2,1      | -                              |

| ID        | Num. in <i>C. crottensteini</i> | Num. in <i>C. caudata</i> | Num. in <i>P. trifidatus</i> | Note                                               | GO                                                                                                                                                                                                                                                                                                                                                                                                                                         | InterPro                                                                                                                                                                               | Members in <i>C. crottensteini</i> | Members in <i>C. caudata</i> | Members in <i>P. trifidatus</i> |
|-----------|---------------------------------|---------------------------|------------------------------|----------------------------------------------------|--------------------------------------------------------------------------------------------------------------------------------------------------------------------------------------------------------------------------------------------------------------------------------------------------------------------------------------------------------------------------------------------------------------------------------------------|----------------------------------------------------------------------------------------------------------------------------------------------------------------------------------------|------------------------------------|------------------------------|---------------------------------|
| GF0041767 | 0                               | 1                         | 0                            | Hypothetical protein (1)                           | zinc ion binding [GO:0008270 molecular_function] (1)                                                                                                                                                                                                                                                                                                                                                                                       | Zinc finger, SWIM-type [IPR007527] (1); Zinc finger, PAM2-type [IPR006064] (1)                                                                                                         | -                                  | C_uni98_01799_mRNA_1.1       | -                               |
| GF0041766 | 0                               | 1                         | 0                            | Hypothetical protein (1)                           | Prionomimetic indica-insensitive protein 2 protein binding [GO:0005515 molecular_function] (1)                                                                                                                                                                                                                                                                                                                                             | Leucine-rich repeat [IPR001611] (1); Leucine-rich repeat domain, I. domain-like [IPR032675] (1)                                                                                        | -                                  | C_uni98_01798_mRNA_7.1       | -                               |
| GF0041765 | 0                               | 1                         | 0                            | Hypothetical protein (1)                           | WD40 repeat-containing protein 55 like (1)                                                                                                                                                                                                                                                                                                                                                                                                 | WD40 repeat-containing domain [IPR017960] (1); WD40/YVTN repeat-like-containing domain [IPR015943] (1)                                                                                 | -                                  | C_uni98_01798_mRNA_3.1       | -                               |
| GF0041764 | 0                               | 1                         | 0                            | Hypothetical protein (1)                           | -                                                                                                                                                                                                                                                                                                                                                                                                                                          | -                                                                                                                                                                                      | -                                  | C_uni98_01798_mRNA_2.1       | -                               |
| GF0041763 | 0                               | 1                         | 0                            | Hypothetical protein (1)                           | -                                                                                                                                                                                                                                                                                                                                                                                                                                          | -                                                                                                                                                                                      | -                                  | C_uni98_01797_mRNA_5.1       | -                               |
| GF0041762 | 0                               | 1                         | 0                            | Hypothetical protein (1)                           | -                                                                                                                                                                                                                                                                                                                                                                                                                                          | -                                                                                                                                                                                      | -                                  | C_uni98_01797_mRNA_2.1       | -                               |
| GF0041761 | 0                               | 1                         | 0                            | Hypothetical protein (1)                           | -                                                                                                                                                                                                                                                                                                                                                                                                                                          | -                                                                                                                                                                                      | -                                  | C_uni98_01796_mRNA_6.1       | -                               |
| GF0041760 | 0                               | 1                         | 0                            | Hypothetical protein (1)                           | nucleic acid binding [GO:0003676 molecular_function] (1); metal ion binding [GO:0046872 molecular_function] (1); nucleotide binding [GO:0000166 molecular_function] (1)                                                                                                                                                                                                                                                                    | Proteinase-3 repeat domain [IPR022885] (1); Ribonuclease H-like domain [IPR012337] (1)                                                                                                 | -                                  | C_uni98_01796_mRNA_2.1       | -                               |
| GF0041759 | 0                               | 1                         | 0                            | Hypothetical protein (1)                           | -                                                                                                                                                                                                                                                                                                                                                                                                                                          | -                                                                                                                                                                                      | -                                  | C_uni98_01793_mRNA_2.1       | -                               |
| GF0041758 | 0                               | 1                         | 0                            | Hypothetical protein (1)                           | -                                                                                                                                                                                                                                                                                                                                                                                                                                          | -                                                                                                                                                                                      | -                                  | C_uni98_01791_mRNA_1.1       | -                               |
| GF0041757 | 0                               | 1                         | 0                            | Hypothetical protein (1)                           | ADP binding [GO:0043531 molecular_function] (1)                                                                                                                                                                                                                                                                                                                                                                                            | NB-ARC [IPR021182] (1); P-loop containing nucleoside triphosphate hydrolase [IPR027417] (1)                                                                                            | -                                  | C_uni98_01790_mRNA_4.1       | -                               |
| GF0041756 | 0                               | 1                         | 0                            | Hypothetical protein (1)                           | -                                                                                                                                                                                                                                                                                                                                                                                                                                          | -                                                                                                                                                                                      | -                                  | C_uni98_01790_mRNA_3.1       | -                               |
| GF0041755 | 0                               | 1                         | 0                            | Phosphoprotein phosphatase (1)                     | ATP binding [GO:0005524 molecular_function] (1); ADP binding [GO:0043531 molecular_function] (1)                                                                                                                                                                                                                                                                                                                                           | Leucine-rich repeat domain, I. domain-like [IPR032675] (1); ATPase domain [IPR015791] (1); NB-ARC [IPR021182] (1); P-loop containing nucleoside triphosphate hydrolase [IPR027417] (1) | -                                  | C_uni98_01790_mRNA_2.1       | -                               |
| GF0041754 | 0                               | 1                         | 0                            | Hypothetical protein (1)                           | ADP binding [GO:0043531 molecular_function] (1)                                                                                                                                                                                                                                                                                                                                                                                            | P-loop containing nucleoside triphosphate hydrolase [IPR027417] (1); NB-ARC [IPR021182] (1); Leucine-rich repeat domain, I. domain-like [IPR032675] (1)                                | -                                  | C_uni98_01790_mRNA_1.1       | -                               |
| GF0041753 | 0                               | 1                         | 0                            | Hypothetical protein (1)                           | -                                                                                                                                                                                                                                                                                                                                                                                                                                          | -                                                                                                                                                                                      | -                                  | C_uni98_01789_mRNA_8.1       | -                               |
| GF0041752 | 0                               | 1                         | 0                            | Hypothetical protein (1)                           | -                                                                                                                                                                                                                                                                                                                                                                                                                                          | -                                                                                                                                                                                      | -                                  | C_uni98_01789_mRNA_7.1       | -                               |
| GF0041751 | 0                               | 1                         | 0                            | Hypothetical protein (1)                           | -                                                                                                                                                                                                                                                                                                                                                                                                                                          | -                                                                                                                                                                                      | -                                  | C_uni98_01789_mRNA_2.1       | -                               |
| GF0041750 | 0                               | 1                         | 0                            | Flavodoxin 3-monooxygenase (1)                     | iron ion binding [GO:0005506 molecular_function] (1); heme binding [GO:0020037 molecular_function] (1); oxidoreductase activity, acting on paired donors, with incorporation or reduction of molecular oxygen [GO:0016765 molecular_function] (1); oxidation-reduction process [GO:0055114 biological_process] (1)                                                                                                                         | Cytochrome P450, E-class, group 1 [IPR024011] (1); Cytochrome P450, conserved site [IPR017972] (1); Cytochrome P450 [IPR001128] (1)                                                    | -                                  | C_uni98_01789_mRNA_1.1       | -                               |
| GF0041749 | 0                               | 1                         | 0                            | Hypothetical protein (1)                           | -                                                                                                                                                                                                                                                                                                                                                                                                                                          | -                                                                                                                                                                                      | -                                  | C_uni98_01787_mRNA_4.1       | -                               |
| GF0041748 | 0                               | 1                         | 0                            | Hypothetical protein (1)                           | -                                                                                                                                                                                                                                                                                                                                                                                                                                          | -                                                                                                                                                                                      | -                                  | C_uni98_01787_mRNA_3.1       | -                               |
| GF0041747 | 0                               | 1                         | 0                            | Hypothetical protein (1)                           | -                                                                                                                                                                                                                                                                                                                                                                                                                                          | -                                                                                                                                                                                      | -                                  | C_uni98_01787_mRNA_2.1       | -                               |
| GF0041746 | 0                               | 1                         | 0                            | Hypothetical protein (1)                           | -                                                                                                                                                                                                                                                                                                                                                                                                                                          | -                                                                                                                                                                                      | -                                  | C_uni98_01786_mRNA_7.1       | -                               |
| GF0041745 | 0                               | 1                         | 0                            | Hypothetical protein (1)                           | -                                                                                                                                                                                                                                                                                                                                                                                                                                          | -                                                                                                                                                                                      | -                                  | C_uni98_01786_mRNA_6.1       | -                               |
| GF0041744 | 0                               | 1                         | 0                            | Hypothetical protein (1)                           | -                                                                                                                                                                                                                                                                                                                                                                                                                                          | -                                                                                                                                                                                      | -                                  | C_uni98_01786_mRNA_4.1       | -                               |
| GF0041743 | 0                               | 1                         | 0                            | Hypothetical protein (1)                           | -                                                                                                                                                                                                                                                                                                                                                                                                                                          | -                                                                                                                                                                                      | -                                  | C_uni98_01786_mRNA_2.1       | -                               |
| GF0041742 | 0                               | 1                         | 0                            | Hypothetical protein (1)                           | -                                                                                                                                                                                                                                                                                                                                                                                                                                          | -                                                                                                                                                                                      | -                                  | C_uni98_01786_mRNA_1.1       | -                               |
| GF0041741 | 0                               | 1                         | 0                            | Hypothetical protein (1)                           | -                                                                                                                                                                                                                                                                                                                                                                                                                                          | -                                                                                                                                                                                      | -                                  | C_uni98_01783_mRNA_4.1       | -                               |
| GF0041740 | 0                               | 1                         | 0                            | Hypothetical protein (1)                           | -                                                                                                                                                                                                                                                                                                                                                                                                                                          | -                                                                                                                                                                                      | -                                  | C_uni98_01783_mRNA_1.1       | -                               |
| GF0041739 | 0                               | 1                         | 0                            | Hypothetical protein (1)                           | -                                                                                                                                                                                                                                                                                                                                                                                                                                          | -                                                                                                                                                                                      | -                                  | C_uni98_01782_mRNA_1.4       | -                               |
| GF0041738 | 0                               | 1                         | 0                            | Hypothetical protein (1)                           | -                                                                                                                                                                                                                                                                                                                                                                                                                                          | -                                                                                                                                                                                      | -                                  | C_uni98_01781_mRNA_7.1       | -                               |
| GF0041737 | 0                               | 1                         | 0                            | Hypothetical protein (1)                           | -                                                                                                                                                                                                                                                                                                                                                                                                                                          | -                                                                                                                                                                                      | -                                  | C_uni98_01781_mRNA_6.1       | -                               |
| GF0041736 | 0                               | 1                         | 0                            | Hypothetical protein (1)                           | -                                                                                                                                                                                                                                                                                                                                                                                                                                          | -                                                                                                                                                                                      | -                                  | C_uni98_01781_mRNA_3.1       | -                               |
| GF0041735 | 0                               | 1                         | 0                            | Hypothetical protein (1)                           | proteolysis [GO:0006508 biological_process] (1); aspartic-type endopeptidase activity [GO:0004190 molecular_function] (1)                                                                                                                                                                                                                                                                                                                  | Peptidase A2A, retrovirus, catalytic [IPR001995] (1)                                                                                                                                   | -                                  | C_uni98_01781_mRNA_2.1       | -                               |
| GF0041734 | 0                               | 1                         | 0                            | Hypothetical protein (1)                           | -                                                                                                                                                                                                                                                                                                                                                                                                                                          | -                                                                                                                                                                                      | -                                  | C_uni98_01781_mRNA_1.1       | -                               |
| GF0041733 | 0                               | 1                         | 0                            | Hypothetical protein (1)                           | -                                                                                                                                                                                                                                                                                                                                                                                                                                          | -                                                                                                                                                                                      | -                                  | C_uni98_01780_mRNA_1.1       | -                               |
| GF0041732 | 0                               | 1                         | 0                            | Hypothetical protein (1)                           | carbohydrate metabolic process [GO:0005975 biological_process] (1); phosphotransferase activity, alcohol group as acceptor [GO:0016773 molecular_function] (1)                                                                                                                                                                                                                                                                             | Carbohydrate kinase, FGGY, N-terminal [IPR018484] (1)                                                                                                                                  | -                                  | C_uni98_01779_mRNA_5.1       | -                               |
| GF0041731 | 0                               | 1                         | 0                            | Hypothetical protein (1)                           | carbohydrate metabolic process [GO:0005975 biological_process] (1); phosphotransferase activity, alcohol group as acceptor [GO:0016773 molecular_function] (1)                                                                                                                                                                                                                                                                             | Carbohydrate kinase, FGGY, C-terminal [IPR018485] (1)                                                                                                                                  | -                                  | C_uni98_01779_mRNA_4.1       | -                               |
| GF0041730 | 0                               | 1                         | 0                            | Hypothetical protein (1)                           | phosphotransferase activity, alcohol group as acceptor [GO:0016773 molecular_function] (1); carbohydrate metabolic process [GO:0005975 biological_process] (1)                                                                                                                                                                                                                                                                             | Carbohydrate kinase, FGGY, C-terminal [IPR018485] (1)                                                                                                                                  | -                                  | C_uni98_01779_mRNA_2.1       | -                               |
| GF0041729 | 0                               | 1                         | 0                            | Hypothetical protein (1)                           | -                                                                                                                                                                                                                                                                                                                                                                                                                                          | -                                                                                                                                                                                      | -                                  | C_uni98_01776_mRNA_5.1       | -                               |
| GF0041728 | 0                               | 1                         | 0                            | Hypothetical protein (1)                           | -                                                                                                                                                                                                                                                                                                                                                                                                                                          | -                                                                                                                                                                                      | -                                  | C_uni98_01776_mRNA_2.1       | -                               |
| GF0041727 | 0                               | 1                         | 0                            | Hypothetical protein (1)                           | -                                                                                                                                                                                                                                                                                                                                                                                                                                          | -                                                                                                                                                                                      | -                                  | C_uni98_01774_mRNA_5.1       | -                               |
| GF0041726 | 0                               | 1                         | 0                            | Putative disease resistance RPP15-like protein (1) | -                                                                                                                                                                                                                                                                                                                                                                                                                                          | -                                                                                                                                                                                      | -                                  | C_uni98_01773_mRNA_2.1       | -                               |
| GF0041725 | 0                               | 1                         | 0                            | UDP-glycosyltransferase 74E1 (1)                   | transferase activity, transferring hexosyl groups [GO:0016758 molecular_function] (1); metabolic process [GO:0008152 biological_process] (1)                                                                                                                                                                                                                                                                                               | UDP-glycosyltransferase [IPR002213] (1)                                                                                                                                                | -                                  | C_uni98_01773_mRNA_1.1       | -                               |
| GF0041724 | 0                               | 1                         | 0                            | Hypothetical protein (1)                           | -                                                                                                                                                                                                                                                                                                                                                                                                                                          | -                                                                                                                                                                                      | -                                  | C_uni98_01772_mRNA_1.1       | -                               |
| GF0041723 | 0                               | 1                         | 0                            | Hypothetical protein (1)                           | -                                                                                                                                                                                                                                                                                                                                                                                                                                          | -                                                                                                                                                                                      | -                                  | C_uni98_01771_mRNA_9.1       | -                               |
| GF0041722 | 0                               | 1                         | 0                            | Hypothetical protein (1)                           | recognition of pollen [GO:0048544 biological_process] (1)                                                                                                                                                                                                                                                                                                                                                                                  | S-locus glycoprotein domain [IPR000858] (1)                                                                                                                                            | -                                  | C_uni98_01771_mRNA_7.1       | -                               |
| GF0041721 | 0                               | 1                         | 0                            | Hypothetical protein (1)                           | -                                                                                                                                                                                                                                                                                                                                                                                                                                          | -                                                                                                                                                                                      | -                                  | C_uni98_01771_mRNA_5.1       | -                               |
| GF0041720 | 0                               | 1                         | 0                            | Hypothetical protein (1)                           | -                                                                                                                                                                                                                                                                                                                                                                                                                                          | -                                                                                                                                                                                      | -                                  | C_uni98_01771_mRNA_10.1      | -                               |
| GF0041719 | 0                               | 1                         | 0                            | S locus glycoprotein (1)                           | recognition of pollen [GO:0048544 biological_process] (1)                                                                                                                                                                                                                                                                                                                                                                                  | S-locus glycoprotein domain [IPR000858] (1); Bulb-type lectin domain [IPR001480] (1); PAN/Apple domain [IPR003699] (1)                                                                 | -                                  | C_uni98_01771_mRNA_1.1       | -                               |
| GF0041718 | 0                               | 1                         | 0                            | Hypothetical protein (1)                           | -                                                                                                                                                                                                                                                                                                                                                                                                                                          | -                                                                                                                                                                                      | -                                  | C_uni98_01770_mRNA_5.1       | -                               |
| GF0041717 | 0                               | 1                         | 0                            | Hypothetical protein (1)                           | -                                                                                                                                                                                                                                                                                                                                                                                                                                          | -                                                                                                                                                                                      | -                                  | C_uni98_01770_mRNA_2.1       | -                               |
| GF0041716 | 0                               | 1                         | 0                            | Hypothetical protein (1)                           | -                                                                                                                                                                                                                                                                                                                                                                                                                                          | -                                                                                                                                                                                      | -                                  | C_uni98_01770_mRNA_1.1       | -                               |
| GF0041715 | 0                               | 1                         | 0                            | Hypothetical protein (1)                           | -                                                                                                                                                                                                                                                                                                                                                                                                                                          | -                                                                                                                                                                                      | -                                  | C_uni98_01769_mRNA_1.1       | -                               |
| GF0041714 | 0                               | 1                         | 0                            | Hypothetical protein (1)                           | -                                                                                                                                                                                                                                                                                                                                                                                                                                          | -                                                                                                                                                                                      | -                                  | C_uni98_01766_mRNA_3.1       | -                               |
| GF0041713 | 0                               | 1                         | 0                            | Hypothetical protein (1)                           | -                                                                                                                                                                                                                                                                                                                                                                                                                                          | -                                                                                                                                                                                      | -                                  | C_uni98_01767_mRNA_2.1       | -                               |
| GF0041712 | 0                               | 1                         | 0                            | Hypothetical protein (1)                           | -                                                                                                                                                                                                                                                                                                                                                                                                                                          | -                                                                                                                                                                                      | -                                  | C_uni98_01766_mRNA_1.1       | -                               |
| GF0041711 | 0                               | 1                         | 0                            | Hypothetical protein (1)                           | -                                                                                                                                                                                                                                                                                                                                                                                                                                          | -                                                                                                                                                                                      | -                                  | C_uni98_01765_mRNA_5.1       | -                               |
| GF0041710 | 0                               | 1                         | 0                            | Hypothetical protein (1)                           | -                                                                                                                                                                                                                                                                                                                                                                                                                                          | -                                                                                                                                                                                      | -                                  | C_uni98_01765_mRNA_4.1       | -                               |
| GF0041709 | 0                               | 1                         | 0                            | Hypothetical protein (1)                           | -                                                                                                                                                                                                                                                                                                                                                                                                                                          | -                                                                                                                                                                                      | -                                  | C_uni98_01764_mRNA_5.1       | -                               |
| GF0041708 | 0                               | 1                         | 0                            | Hypothetical protein (1)                           | -                                                                                                                                                                                                                                                                                                                                                                                                                                          | -                                                                                                                                                                                      | -                                  | C_uni98_01764_mRNA_3.1       | -                               |
| GF0041707 | 0                               | 1                         | 0                            | Hypothetical protein (1)                           | -                                                                                                                                                                                                                                                                                                                                                                                                                                          | -                                                                                                                                                                                      | -                                  | C_uni98_01764_mRNA_2.1       | -                               |
| GF0041706 | 0                               | 1                         | 0                            | Putative calcium-binding protein CML16 (1)         | calcium ion binding [GO:0005509 molecular_function] (1)                                                                                                                                                                                                                                                                                                                                                                                    | EF-hand domain pair [IPR011922] (1); EF-hand domain [IPR020288] (1); EF-hand 1, calcium-binding site [IPR014247] (1)                                                                   | -                                  | C_uni98_01763_mRNA_2.1       | -                               |
| GF0041705 | 0                               | 1                         | 0                            | Hypothetical protein (1)                           | ATP binding [GO:0005524 molecular_function] (1); cytoplasm [GO:0005737 cellular_component] (1); DNA binding [GO:0060677 molecular_function] (1); zinc ion binding [GO:0008270 molecular_function] (1); helicase activity [GO:0003686 molecular_function] (1); nuclear-transcribed mRNA catabolic process, nonsense-mediated decay [GO:0000184 biological_process] (1)                                                                      | RNA helixase URF1, URF2-interacting domain [IPR018999] (1)                                                                                                                             | -                                  | C_uni98_01763_mRNA_1.1       | -                               |
| GF0041704 | 0                               | 1                         | 0                            | Hypothetical protein (1)                           | -                                                                                                                                                                                                                                                                                                                                                                                                                                          | -                                                                                                                                                                                      | -                                  | C_uni98_01762_mRNA_4.1       | -                               |
| GF0041703 | 0                               | 1                         | 0                            | Hypothetical protein (1)                           | -                                                                                                                                                                                                                                                                                                                                                                                                                                          | -                                                                                                                                                                                      | -                                  | C_uni98_01762_mRNA_2.1       | -                               |
| GF0041702 | 0                               | 1                         | 0                            | Hypothetical protein (1)                           | phospholipid-translocating ATPase activity [GO:0004012 molecular_function] (1); metal ion binding [GO:0046872 molecular_function] (1); phospholipid transport [GO:00019314 biological_process] (1); integral component of membrane [GO:0016021 cellular_component] (1); magnesium ion binding [GO:0000287 molecular_function] (1); ATP binding [GO:0005524 molecular_function] (1); nucleotide binding [GO:0000166 molecular_function] (1) | P-type ATPase, subfamily IV [IPR006539] (1); P-type ATPase, A domain [IPR008250] (1)                                                                                                   | -                                  | C_uni98_01762_mRNA_1.1       | -                               |
| GF0041701 | 0                               | 1                         | 0                            | Hypothetical protein (1)                           | -                                                                                                                                                                                                                                                                                                                                                                                                                                          | -                                                                                                                                                                                      | -                                  | C_uni98_01761_mRNA_5.1       | -                               |
| GF0041700 | 0                               | 1                         | 0                            | Hypothetical protein (1)                           | -                                                                                                                                                                                                                                                                                                                                                                                                                                          | -                                                                                                                                                                                      | -                                  | C_uni98_01761_mRNA_4.1       | -                               |
| GF0041699 | 0                               | 1                         | 0                            | Retroransposon protein, putative, unclassified (1) | nucleic acid binding [GO:0003676 molecular_function] (1); oxidoreductase activity, acting on paired donors, with incorporation or reduction of molecular oxygen [GO:0016765 molecular_function] (1); oxidation-reduction process [GO:0055114 biological_process] (1); heme binding [GO:0020037 molecular_function] (1); iron ion binding [GO:0005506 molecular_function] (1)                                                               | Ribonuclease H-like domain [IPR012337] (1)                                                                                                                                             | -                                  | C_uni98_01761_mRNA_3.1       | -                               |
| GF0041698 | 0                               | 1                         | 0                            | Cytochrome P450 716B2 (1)                          | -                                                                                                                                                                                                                                                                                                                                                                                                                                          | -                                                                                                                                                                                      | -                                  | C_uni98_01760_mRNA_5.1       | -                               |
| GF0041697 | 0                               | 1                         | 0                            | Hypothetical protein (1)                           | -                                                                                                                                                                                                                                                                                                                                                                                                                                          | -                                                                                                                                                                                      | -                                  | C_uni98_01760_mRNA_3.1       | -                               |

| ID        | Num. in <i>C. crotolariae</i> | Num. in <i>C. canalis</i> | Num. in <i>P. trifidatus</i> | Note                                                          | GO                                                                                                                                                                                                                                                                                                                                                                                                                                                                                                              | InterPro                                                                                                                                                                                                                                                                                         | Members in <i>Crotolariae</i> | Members in <i>Canalis</i> | Members in <i>Trifidatus</i> |
|-----------|-------------------------------|---------------------------|------------------------------|---------------------------------------------------------------|-----------------------------------------------------------------------------------------------------------------------------------------------------------------------------------------------------------------------------------------------------------------------------------------------------------------------------------------------------------------------------------------------------------------------------------------------------------------------------------------------------------------|--------------------------------------------------------------------------------------------------------------------------------------------------------------------------------------------------------------------------------------------------------------------------------------------------|-------------------------------|---------------------------|------------------------------|
| GF0041696 | 0                             | 1                         | 1                            | 0 Caffeic acid 3-O-methyltransferase (1)                      | methyltransferase activity [GO:0008168 molecular_function] (1); O-methyltransferase activity [GO:0008171 molecular_function] (1)                                                                                                                                                                                                                                                                                                                                                                                | Winged helix-turn-helix DNA-binding domain [IPRO11991] (1); O-methyltransferase family 2 [IPRO01077] (1); O-methyltransferase COMT-type [IPRO14461] (1); S-adenosyl-L-methionine-dependent methyltransferase [IPRO29063] (1)                                                                     | -                             | C_umhu_01760_mRNA_2,1     | -                            |
| GF0041695 | 0                             | 1                         | 1                            | 0 Hypothetical protein (1)                                    | -                                                                                                                                                                                                                                                                                                                                                                                                                                                                                                               | -                                                                                                                                                                                                                                                                                                | -                             | C_umhu_01760_mRNA_1,1     | -                            |
| GF0041694 | 0                             | 1                         | 1                            | 0 Hypothetical protein (1)                                    | -                                                                                                                                                                                                                                                                                                                                                                                                                                                                                                               | -                                                                                                                                                                                                                                                                                                | -                             | C_umhu_01759_mRNA_3,1     | -                            |
| GF0041693 | 0                             | 1                         | 1                            | 0 Hypothetical protein (1)                                    | zinc ion binding [GO:0008270 molecular_function] (1); nucleic acid binding [GO:0003676 molecular_function] (1)                                                                                                                                                                                                                                                                                                                                                                                                  | Zinc finger, CCHC-type [IPRO01878] (1)                                                                                                                                                                                                                                                           | -                             | C_umhu_01759_mRNA_2,1     | -                            |
| GF0041692 | 0                             | 1                         | 1                            | 0 Hypothetical protein (1)                                    | -                                                                                                                                                                                                                                                                                                                                                                                                                                                                                                               | -                                                                                                                                                                                                                                                                                                | -                             | C_umhu_01758_mRNA_6,1     | -                            |
| GF0041691 | 0                             | 1                         | 1                            | 0 Hypothetical protein (1)                                    | -                                                                                                                                                                                                                                                                                                                                                                                                                                                                                                               | -                                                                                                                                                                                                                                                                                                | -                             | C_umhu_01758_mRNA_5,1     | -                            |
| GF0041690 | 0                             | 1                         | 1                            | 0 Hypothetical protein (1)                                    | -                                                                                                                                                                                                                                                                                                                                                                                                                                                                                                               | -                                                                                                                                                                                                                                                                                                | -                             | C_umhu_01758_mRNA_11,1    | -                            |
| GF0041689 | 0                             | 1                         | 1                            | 0 Hypothetical protein (1)                                    | -                                                                                                                                                                                                                                                                                                                                                                                                                                                                                                               | -                                                                                                                                                                                                                                                                                                | -                             | C_umhu_01758_mRNA_10,1    | -                            |
| GF0041688 | 0                             | 1                         | 1                            | 0 Hypothetical protein (1)                                    | nucleotidyltransferase activity [GO:0016779 molecular_function] (1) heme binding [GO:0020037 molecular_function] (1); iron ion binding [GO:0005506 molecular_function] (1); oxidation-reduction process [GO:005114 biological_process] (1); oxidoreductase activity, acting on paired donors, with incorporation or reduction of molecular oxygen [GO:0016785 molecular_function] (1)                                                                                                                           | Polymerase, nucleotidyl transferase domain [IPRO02934] (1)                                                                                                                                                                                                                                       | -                             | C_umhu_01758_mRNA_1,1     | -                            |
| GF0041687 | 0                             | 1                         | 1                            | 0 Cytochrome P450 42M4 (1)                                    | -                                                                                                                                                                                                                                                                                                                                                                                                                                                                                                               | Cytochrome P450, E-class, group I [IPRO02401] (1); Cytochrome P450 [IPRO01128] (1)                                                                                                                                                                                                               | -                             | C_umhu_01756_mRNA_9,1     | -                            |
| GF0041686 | 0                             | 1                         | 1                            | 0 N(2),N(2)-dimethylguanosine tRNA methyltransferase Trm1 (1) | tRNA processing [GO:0008033 biological_process] (1); RNA binding [GO:0003723 molecular_function] (1); tRNA (guanine N2)-methyltransferase activity [GO:0004809 molecular_function] (1)                                                                                                                                                                                                                                                                                                                          | tRNA methyltransferase, Trm1 [IPRO02905] (1); S-adenosyl-L-methionine-dependent methyltransferase [IPRO29063] (1)                                                                                                                                                                                | -                             | C_umhu_01756_mRNA_2,1     | -                            |
| GF0041685 | 0                             | 1                         | 1                            | 0 Hypothetical protein (1)                                    | -                                                                                                                                                                                                                                                                                                                                                                                                                                                                                                               | -                                                                                                                                                                                                                                                                                                | -                             | C_umhu_01755_mRNA_5,1     | -                            |
| GF0041684 | 0                             | 1                         | 1                            | 0 Hypothetical protein (1)                                    | zinc ion binding [GO:0008270 molecular_function] (1); nucleic acid binding [GO:0003676 molecular_function] (1)                                                                                                                                                                                                                                                                                                                                                                                                  | Zinc finger, CCHC-type [IPRO01878] (1)                                                                                                                                                                                                                                                           | -                             | C_umhu_01755_mRNA_2,1     | -                            |
| GF0041683 | 0                             | 1                         | 1                            | 0 Hypothetical protein (1)                                    | nucleic acid binding [GO:0003676 molecular_function] (1); ATP binding [GO:0005524 molecular_function] (1)                                                                                                                                                                                                                                                                                                                                                                                                       | DEAD/DEAF1 box helicase domain [IPRO11451] (1); P-loop containing nucleoside triphosphate hydrolase [IPRO27417] (1); Helicase superfamily 1,2, ATP-binding domain [IPRO14001] (1)                                                                                                                | -                             | C_umhu_01755_mRNA_1,1     | -                            |
| GF0041682 | 0                             | 1                         | 1                            | 0 Disease resistance protein RPS2 (1)                         | ADP binding [GO:0004331 molecular_function] (1); protein binding [GO:0005515 molecular_function] (1)                                                                                                                                                                                                                                                                                                                                                                                                            | Leucine-rich repeat domain, L domain-like [IPRO2575] (1); Y8-ARC [IPRO02182] (1); Leucine-rich repeat [IPRO01611] (1); P-loop containing nucleoside triphosphate hydrolase [IPRO27417] (1)                                                                                                       | -                             | C_umhu_01754_mRNA_4,1     | -                            |
| GF0041681 | 0                             | 1                         | 1                            | 0 UPP481 protein (1)                                          | -                                                                                                                                                                                                                                                                                                                                                                                                                                                                                                               | Protein of unknown function DUF247, plant [IPRO04156] (1)                                                                                                                                                                                                                                        | -                             | C_umhu_01753_mRNA_7,1     | -                            |
| GF0041680 | 0                             | 1                         | 1                            | 0 Hypothetical protein (1)                                    | -                                                                                                                                                                                                                                                                                                                                                                                                                                                                                                               | Protein of unknown function DUF247, plant [IPRO04156] (1)                                                                                                                                                                                                                                        | -                             | C_umhu_01753_mRNA_6,1     | -                            |
| GF0041679 | 0                             | 1                         | 1                            | 0 Hypothetical protein (1)                                    | -                                                                                                                                                                                                                                                                                                                                                                                                                                                                                                               | -                                                                                                                                                                                                                                                                                                | -                             | C_umhu_01753_mRNA_5,1     | -                            |
| GF0041678 | 0                             | 1                         | 1                            | 0 Mitogen-activated protein kinase kinase (1)                 | ATP binding [GO:0005524 molecular_function] (1); protein phosphorylation [GO:0006468 biological_process] (1); protein kinase activity [GO:0004672 molecular_function] (1)                                                                                                                                                                                                                                                                                                                                       | Protein kinase domain [IPRO00719] (1); Protein kinase-like domain [IPRO11009] (1); Protein kinase, ATP binding site [IPRO17441] (1); Serine/threonine protein kinase, active site [IPRO08271] (1); Serine/threonine-specific protein kinase, catalytic domain [IPRO02290] (1)                    | -                             | C_umhu_01753_mRNA_2,1     | -                            |
| GF0041677 | 0                             | 1                         | 1                            | 0 Hypothetical protein (1)                                    | -                                                                                                                                                                                                                                                                                                                                                                                                                                                                                                               | -                                                                                                                                                                                                                                                                                                | -                             | C_umhu_01752_mRNA_9,1     | -                            |
| GF0041676 | 0                             | 1                         | 1                            | 0 Hypothetical protein (1)                                    | -                                                                                                                                                                                                                                                                                                                                                                                                                                                                                                               | -                                                                                                                                                                                                                                                                                                | -                             | C_umhu_01752_mRNA_7,1     | -                            |
| GF0041675 | 0                             | 1                         | 1                            | 0 Wall-associated receptor kinase 2 (1)                       | polysaccharide binding [GO:0030247 molecular_function] (1)                                                                                                                                                                                                                                                                                                                                                                                                                                                      | Wall-associated receptor kinase, galactanose-binding domain [IPRO25287] (1)                                                                                                                                                                                                                      | -                             | C_umhu_01751_mRNA_3,1     | -                            |
| GF0041674 | 0                             | 1                         | 1                            | 0 Hypothetical protein (1)                                    | -                                                                                                                                                                                                                                                                                                                                                                                                                                                                                                               | -                                                                                                                                                                                                                                                                                                | -                             | C_umhu_01750_mRNA_2,1     | -                            |
| GF0041673 | 0                             | 1                         | 1                            | 0 Hypothetical protein (1)                                    | -                                                                                                                                                                                                                                                                                                                                                                                                                                                                                                               | -                                                                                                                                                                                                                                                                                                | -                             | C_umhu_01749_mRNA_3,1     | -                            |
| GF0041672 | 0                             | 1                         | 1                            | 0 Hypothetical protein (1)                                    | -                                                                                                                                                                                                                                                                                                                                                                                                                                                                                                               | -                                                                                                                                                                                                                                                                                                | -                             | C_umhu_01749_mRNA_4,1     | -                            |
| GF0041671 | 0                             | 1                         | 1                            | 0 Hypothetical protein (1)                                    | -                                                                                                                                                                                                                                                                                                                                                                                                                                                                                                               | -                                                                                                                                                                                                                                                                                                | -                             | C_umhu_01748_mRNA_5,1     | -                            |
| GF0041670 | 0                             | 1                         | 1                            | 0 Hypothetical protein (1)                                    | -                                                                                                                                                                                                                                                                                                                                                                                                                                                                                                               | -                                                                                                                                                                                                                                                                                                | -                             | C_umhu_01747_mRNA_4,1     | -                            |
| GF0041669 | 0                             | 1                         | 1                            | 0 Hypothetical protein (1)                                    | -                                                                                                                                                                                                                                                                                                                                                                                                                                                                                                               | -                                                                                                                                                                                                                                                                                                | -                             | C_umhu_01747_mRNA_3,1     | -                            |
| GF0041668 | 0                             | 1                         | 1                            | 0 Disease resistance protein (1)                              | ADP binding [GO:0004331 molecular_function] (1)                                                                                                                                                                                                                                                                                                                                                                                                                                                                 | P-loop containing nucleoside triphosphate hydrolase [IPRO27417] (1); N16-ARC [IPRO02182] (1); Leucine-rich repeat domain, L domain-like [IPRO2675] (1)                                                                                                                                           | -                             | C_umhu_01747_mRNA_2,1     | -                            |
| GF0041667 | 0                             | 1                         | 1                            | 0 Hypothetical protein (1)                                    | -                                                                                                                                                                                                                                                                                                                                                                                                                                                                                                               | -                                                                                                                                                                                                                                                                                                | -                             | C_umhu_01747_mRNA_1,1     | -                            |
| GF0041666 | 0                             | 1                         | 1                            | 0 Hypothetical protein (1)                                    | asparagine-tRNA ligase activity [GO:0004816 molecular_function] (1); aminoacyl-tRNA ligase activity [GO:0004812 molecular_function] (1); asparaginyl-tRNA aminoacylation [GO:0006027 biological_process] (1); tRNA aminoacylation for protein translation [GO:0006048 biological_process] (1); cytoplasm [GO:0005737 cellular_component] (1); nucleotide binding [GO:0000166 molecular_function] (1); nucleic acid binding [GO:0003676 molecular_function] (1); ATP binding [GO:0005524 molecular_function] (1) | Asparagine-tRNA ligase [IPRO04522] (1); Aminoacyl-tRNA synthetase, class II (D,K,N) [IPRO04364] (1); Aminoacyl-tRNA synthetase, class II (G,K,N)-like [IPRO18150] (1); OB-6d nucleic acid binding domain, tRNA-tRNA synthetase-type [IPRO04565] (1); Nucleic acid-binding, OB-6d [IPRO12340] (1) | -                             | C_umhu_01746_mRNA_1,1     | -                            |
| GF0041665 | 0                             | 1                         | 1                            | 0 Mutant xyloglucan endo-4-methylglucosylase (1)              | carbohydrate metabolic process [GO:0005979 biological_process] (1); hydrolase activity, hydrolyzing O-glycosyl compounds [GO:0004553 molecular_function] (1)                                                                                                                                                                                                                                                                                                                                                    | Glycoside hydrolase family 16 [IPRO00757] (1); Concavulin A-like lectin/glucanase domain [IPRO13320] (1)                                                                                                                                                                                         | -                             | C_umhu_01745_mRNA_9,1     | -                            |
| GF0041664 | 0                             | 1                         | 1                            | 0 NAC domain protein NACS (1)                                 | DNA binding [GO:0003677 molecular_function] (1); regulation of transcription, DNA-dependent [GO:000355 biological_process] (1)                                                                                                                                                                                                                                                                                                                                                                                  | NAC domain [IPRO03441] (1)                                                                                                                                                                                                                                                                       | -                             | C_umhu_01745_mRNA_6,1     | -                            |
| GF0041663 | 0                             | 1                         | 1                            | 0 Mutant xyloglucan endo-4-methylglucosylase (1)              | carbohydrate metabolic process [GO:0005979 biological_process] (1); hydrolase activity, hydrolyzing O-glycosyl compounds [GO:0004553 molecular_function] (1)                                                                                                                                                                                                                                                                                                                                                    | Concavulin A-like lectin/glucanase domain [IPRO13320] (1); Glycoside hydrolase family 16 [IPRO00757] (1)                                                                                                                                                                                         | -                             | C_umhu_01745_mRNA_5,1     | -                            |
| GF0041662 | 0                             | 1                         | 1                            | 0 Hypothetical protein (1)                                    | protein dimerization activity [GO:0046983 molecular_function] (1)                                                                                                                                                                                                                                                                                                                                                                                                                                               | Plant methyltransferase dimerization [IPRO12967] (1); Winged helix-turn-helix DNA-binding domain [IPRO11991] (1)                                                                                                                                                                                 | -                             | C_umhu_01745_mRNA_3,1     | -                            |
| GF0041661 | 0                             | 1                         | 1                            | 0 Hypothetical protein (1)                                    | -                                                                                                                                                                                                                                                                                                                                                                                                                                                                                                               | -                                                                                                                                                                                                                                                                                                | -                             | C_umhu_01745_mRNA_2,1     | -                            |
| GF0041660 | 0                             | 1                         | 1                            | 0 Xyloglucan endo-4-methylglucosylase (1)                     | apophat [GO:0048046 cellular_component] (1); cellular glucan metabolic process [GO:0006073 biological_process] (1); cell wall [GO:0005618 cellular_component] (1); hydrolase activity, hydrolyzing O-glycosyl compounds [GO:0004553 molecular_function] (1); carbohydrate metabolic process [GO:0005975 biological_process] (1); xyloglucan xyloglucosyl transferase activity [GO:0016782 molecular_function] (1)                                                                                               | Xyloglucan endo-4-methylglucosylase, C-terminal [IPRO10713] (1); Glycoside hydrolase family 16 [IPRO00757] (1); Concavulin A-like lectin/glucanase domain [IPRO13320] (1)                                                                                                                        | -                             | C_umhu_01745_mRNA_10,1    | -                            |
| GF0041659 | 0                             | 1                         | 1                            | 0 Hypothetical protein (1)                                    | methyltransferase activity [GO:0008168 molecular_function] (1); O-methyltransferase activity [GO:0008171 molecular_function] (1)                                                                                                                                                                                                                                                                                                                                                                                | S-adenosyl-L-methionine-dependent methyltransferase [IPRO29063] (1); O-methyltransferase COMT-type [IPRO14461] (1); O-methyltransferase, family 2 [IPRO01077] (1); Cupredoxin [IPRO08972] (1); Phytyloxyamin domain [IPRO02425] (1); Blue trypsin I repeat protein, binding site [IPRO28871] (1) | -                             | C_umhu_01745_mRNA_1,1     | -                            |
| GF0041658 | 0                             | 1                         | 1                            | 0 Mavicain (1)                                                | electron carrier activity [GO:0009955 molecular_function] (1)                                                                                                                                                                                                                                                                                                                                                                                                                                                   | Cupredoxin [IPRO08972] (1); Blue trypsin I repeat protein, binding site [IPRO28871] (1)                                                                                                                                                                                                          | -                             | C_umhu_01744_mRNA_2,1     | -                            |
| GF0041657 | 0                             | 1                         | 1                            | 0 Halosulfide dehalogenase-like hydrolase (1)                 | metabolic process [GO:0008152 biological_process] (1); hydrolase activity [GO:0016787 molecular_function] (1)                                                                                                                                                                                                                                                                                                                                                                                                   | HAD hydrolase, subfamily IA [IPRO06491] (1); Pyrimidine 5-methyltransferase [IPRO10237] (1); HAD-like domain [IPRO23214] (1)                                                                                                                                                                     | -                             | C_umhu_01743_mRNA_5,1     | -                            |
| GF0041656 | 0                             | 1                         | 1                            | 0 Putative mDR family transposase-like (1)                    | DNA binding [GO:0003677 molecular_function] (1); transposase activity [GO:0000080 molecular_function] (1); zinc ion binding [GO:0008270 molecular_function] (1); transposition, DNA-mediated [GO:0006313 biological_process] (1)                                                                                                                                                                                                                                                                                | Transposase, mutator type [IPRO01207] (1); MULE transposase domain [IPRO13299] (1); Zinc finger, SWIM-type [IPRO07527] (1)                                                                                                                                                                       | -                             | C_umhu_01743_mRNA_4,1     | -                            |
| GF0041655 | 0                             | 1                         | 1                            | 0 Hypothetical protein (1)                                    | -                                                                                                                                                                                                                                                                                                                                                                                                                                                                                                               | -                                                                                                                                                                                                                                                                                                | -                             | C_umhu_01742_mRNA_1,1     | -                            |
| GF0041654 | 0                             | 1                         | 1                            | 0 Hypothetical protein (1)                                    | -                                                                                                                                                                                                                                                                                                                                                                                                                                                                                                               | -                                                                                                                                                                                                                                                                                                | -                             | C_umhu_01741_mRNA_3,1     | -                            |
| GF0041653 | 0                             | 1                         | 1                            | 0 Hypothetical protein (1)                                    | nucleic acid binding [GO:0003676 molecular_function] (1)                                                                                                                                                                                                                                                                                                                                                                                                                                                        | Ribonuclease H-like domain [IPRO12337] (1)                                                                                                                                                                                                                                                       | -                             | C_umhu_01741_mRNA_2,1     | -                            |
| GF0041652 | 0                             | 1                         | 1                            | 0 Hypothetical protein (1)                                    | -                                                                                                                                                                                                                                                                                                                                                                                                                                                                                                               | -                                                                                                                                                                                                                                                                                                | -                             | C_umhu_01740_mRNA_2,1     | -                            |
| GF0041651 | 0                             | 1                         | 1                            | 0 Hypothetical protein (1)                                    | -                                                                                                                                                                                                                                                                                                                                                                                                                                                                                                               | -                                                                                                                                                                                                                                                                                                | -                             | C_umhu_01740_mRNA_1,1     | -                            |
| GF0041650 | 0                             | 1                         | 1                            | 0 Hypothetical protein (1)                                    | -                                                                                                                                                                                                                                                                                                                                                                                                                                                                                                               | -                                                                                                                                                                                                                                                                                                | -                             | C_umhu_01739_mRNA_9,1     | -                            |
| GF0041649 | 0                             | 1                         | 1                            | 0 Hypothetical protein (1)                                    | -                                                                                                                                                                                                                                                                                                                                                                                                                                                                                                               | -                                                                                                                                                                                                                                                                                                | -                             | C_umhu_01739_mRNA_6,1     | -                            |
| GF0041648 | 0                             | 1                         | 1                            | 0 Hypothetical protein (1)                                    | zinc ion binding [GO:0008270 molecular_function] (1); nucleic acid binding [GO:0003676 molecular_function] (1)                                                                                                                                                                                                                                                                                                                                                                                                  | Zinc finger, CCHC-type [IPRO01878] (1)                                                                                                                                                                                                                                                           | -                             | C_umhu_01739_mRNA_3,1     | -                            |
| GF0041647 | 0                             | 1                         | 1                            | 0 Hypothetical protein (1)                                    | -                                                                                                                                                                                                                                                                                                                                                                                                                                                                                                               | -                                                                                                                                                                                                                                                                                                | -                             | C_umhu_01739_mRNA_2,1     | -                            |
| GF0041646 | 0                             | 1                         | 1                            | 0 Hypothetical protein (1)                                    | -                                                                                                                                                                                                                                                                                                                                                                                                                                                                                                               | -                                                                                                                                                                                                                                                                                                | -                             | C_umhu_01739_mRNA_1,1     | -                            |
| GF0041645 | 0                             | 1                         | 1                            | 0 Hypothetical protein (1)                                    | calcium ion binding [GO:0005509 molecular_function] (1)                                                                                                                                                                                                                                                                                                                                                                                                                                                         | EF-hand domain pair [IPRO11952] (1); EF-hand domain [IPRO02045] (1)                                                                                                                                                                                                                              | -                             | C_umhu_01738_mRNA_7,1     | -                            |



| ID        | Num. in <i>C. crotolariae</i> | Num. in <i>C. arbutu</i> | Num. in <i>P. trifidata</i> | Name                                                             | GO                                                                                                                                                                                                                                                                                                                                                                                                         | InterPro                                                                                                                                                                                                                                                                             | Members in <i>C. crotolariae</i> | Members in <i>C. arbutu</i> | Members in <i>P. trifidata</i> |
|-----------|-------------------------------|--------------------------|-----------------------------|------------------------------------------------------------------|------------------------------------------------------------------------------------------------------------------------------------------------------------------------------------------------------------------------------------------------------------------------------------------------------------------------------------------------------------------------------------------------------------|--------------------------------------------------------------------------------------------------------------------------------------------------------------------------------------------------------------------------------------------------------------------------------------|----------------------------------|-----------------------------|--------------------------------|
| GF0041644 | 0                             | 1                        | 1                           | 0 Adenylate kinase (1)                                           | ATP binding [GO:0005524 molecular_function] (1); nucleobase-containing compound kinase activity [GO:0019205 molecular_function] (1); nucleobase-containing compound metabolic process [GO:0006139 biological_process] (1)                                                                                                                                                                                  | P-loop containing nucleoside triphosphate hydrolase [IPR027417] (1); Adenylate kinase UMP-CMP kinase [IPR000850] (1)                                                                                                                                                                 | -                                | C_unihit_01738_mRNA_4.1     | -                              |
| GF0041643 | 0                             | 1                        | 1                           | 0 Hypothetical protein (1)                                       | -                                                                                                                                                                                                                                                                                                                                                                                                          | -                                                                                                                                                                                                                                                                                    | -                                | C_unihit_01738_mRNA_3.1     | -                              |
| GF0041642 | 0                             | 1                        | 1                           | 0 Hypothetical protein (1)                                       | -                                                                                                                                                                                                                                                                                                                                                                                                          | -                                                                                                                                                                                                                                                                                    | -                                | C_unihit_01738_mRNA_2.1     | -                              |
| GF0041641 | 0                             | 1                        | 1                           | 0 Adenylate kinase (1)                                           | nucleobase-containing compound kinase activity [GO:0019205 molecular_function] (1); nucleobase-containing compound metabolic process [GO:0006139 biological_process] (1); ATP binding [GO:0005524 molecular_function] (1)                                                                                                                                                                                  | Adenylate kinase UMP-CMP kinase [IPR000850] (1); P-loop containing nucleoside triphosphate hydrolase [IPR027417] (1)                                                                                                                                                                 | -                                | C_unihit_01738_mRNA_1.1     | -                              |
| GF0041640 | 0                             | 1                        | 1                           | 0 Hypothetical protein (1)                                       | -                                                                                                                                                                                                                                                                                                                                                                                                          | -                                                                                                                                                                                                                                                                                    | -                                | C_unihit_01736_mRNA_4.1     | -                              |
| GF0041639 | 0                             | 1                        | 1                           | 0 Hypothetical protein (1)                                       | oxidoreductase activity [GO:0016491 molecular_function] (1); oxidation-reduction process [GO:0055114 biological_process] (1)                                                                                                                                                                                                                                                                               | Oxidoglutarate (iron-dependent) dioxygenase [IPR051213] (1); Isopenicillin N synthase-like [IPR027443] (1)                                                                                                                                                                           | -                                | C_unihit_01734_mRNA_5.1     | -                              |
| GF0041638 | 0                             | 1                        | 1                           | 0 Oxidoreductase, 2OG-Fe oxygenase family protein, expressed (1) | -                                                                                                                                                                                                                                                                                                                                                                                                          | Isopenicillin N synthase-like [IPR027443] (1); Non-haem dioxygenase-N-terminal domain [IPR026992] (1)                                                                                                                                                                                | -                                | C_unihit_01734_mRNA_4.1     | -                              |
| GF0041637 | 0                             | 1                        | 1                           | 0 Hypothetical protein (1)                                       | nucleic acid binding [GO:0003676 molecular_function] (1); zinc ion binding [GO:0008270 molecular_function] (1)                                                                                                                                                                                                                                                                                             | Zinc finger, CCHC-type [IPR001878] (1)                                                                                                                                                                                                                                               | -                                | C_unihit_01733_mRNA_7.1     | -                              |
| GF0041636 | 0                             | 1                        | 1                           | 0 Hypothetical protein (1)                                       | -                                                                                                                                                                                                                                                                                                                                                                                                          | -                                                                                                                                                                                                                                                                                    | -                                | C_unihit_01733_mRNA_4.1     | -                              |
| GF0041635 | 0                             | 1                        | 1                           | 0 Hypothetical protein (1)                                       | -                                                                                                                                                                                                                                                                                                                                                                                                          | -                                                                                                                                                                                                                                                                                    | -                                | C_unihit_01733_mRNA_2.1     | -                              |
| GF0041634 | 0                             | 1                        | 1                           | 0 MAP kinase kinase 2 (1)                                        | protein phosphorylation [GO:0006468 biological_process] (1); protein kinase activity [GO:0003672 molecular_function] (1); ATP binding [GO:0005524 molecular_function] (1)                                                                                                                                                                                                                                  | Serine/threonine-protein kinase, active site [IPR008271] (1); Protein kinase, ATP binding site [IPR017441] (1); Serine/threonine dual specificity protein kinase, catalytic domain [IPR02290] (1); Protein kinase-like domain [IPR011009] (1); Protein kinase domain [IPR000791] (1) | -                                | C_unihit_01733_mRNA_1.1     | -                              |
| GF0041633 | 0                             | 1                        | 1                           | 0 Protein WAX2 (1)                                               | -                                                                                                                                                                                                                                                                                                                                                                                                          | -                                                                                                                                                                                                                                                                                    | -                                | C_unihit_01732_mRNA_4.1     | -                              |
| GF0041632 | 0                             | 1                        | 1                           | 0 Hypothetical protein (1)                                       | -                                                                                                                                                                                                                                                                                                                                                                                                          | -                                                                                                                                                                                                                                                                                    | -                                | C_unihit_01732_mRNA_1.1     | -                              |
| GF0041631 | 0                             | 1                        | 1                           | 0 Sugar transport protein 13 (1)                                 | transporter activity [GO:0005215 molecular_function] (1); transmembrane transport [GO:0050885 biological_process] (1); substrate-specific transmembrane transporter activity [GO:0022391 molecular_function] (1); integral component of membrane [GO:0016021 cellular_component] (1); transmembrane transporter activity [GO:0022857 molecular_function] (1); membrane [GO:0005902 cellular_component] (1) | Major facilitator superfamily domain [IPR020846] (1); Sugar transporter, conserved site [IPR005629] (1); Sugar/mositol transporter [IPR003663] (1); Major facilitator, sugar transporter-like [IPR005628] (1)                                                                        | -                                | C_unihit_01731_mRNA_2.1     | -                              |
| GF0041630 | 0                             | 1                        | 1                           | 0 Hypothetical protein (1)                                       | -                                                                                                                                                                                                                                                                                                                                                                                                          | -                                                                                                                                                                                                                                                                                    | -                                | C_unihit_01731_mRNA_1.1     | -                              |
| GF0041629 | 0                             | 1                        | 1                           | 0 Hypothetical protein (1)                                       | -                                                                                                                                                                                                                                                                                                                                                                                                          | -                                                                                                                                                                                                                                                                                    | -                                | C_unihit_01730_mRNA_3.1     | -                              |
| GF0041628 | 0                             | 1                        | 1                           | 0 Hypothetical protein (1)                                       | -                                                                                                                                                                                                                                                                                                                                                                                                          | -                                                                                                                                                                                                                                                                                    | -                                | C_unihit_01730_mRNA_2.1     | -                              |
| GF0041627 | 0                             | 1                        | 1                           | 0 Hypothetical protein (1)                                       | -                                                                                                                                                                                                                                                                                                                                                                                                          | -                                                                                                                                                                                                                                                                                    | -                                | C_unihit_01730_mRNA_1.1     | -                              |
| GF0041626 | 0                             | 1                        | 1                           | 0 Hypothetical protein (1)                                       | -                                                                                                                                                                                                                                                                                                                                                                                                          | -                                                                                                                                                                                                                                                                                    | -                                | C_unihit_01729_mRNA_11.1    | -                              |
| GF0041625 | 0                             | 1                        | 1                           | 0 Truncated verticillium with resistance-like protein (1)        | protein binding [GO:0005515 molecular_function] (1)                                                                                                                                                                                                                                                                                                                                                        | Leucine-rich repeat domain, L domain-like [IPR026275] (1); Leucine-rich repeat [IPR001611] (1); Leucine-rich repeat-containing N-terminal, plant-type [IPR013210] (1)                                                                                                                | -                                | C_unihit_01728_mRNA_2.1     | -                              |
| GF0041624 | 0                             | 1                        | 1                           | 0 Hypothetical protein (1)                                       | -                                                                                                                                                                                                                                                                                                                                                                                                          | -                                                                                                                                                                                                                                                                                    | -                                | C_unihit_01727_mRNA_3.1     | -                              |
| GF0041623 | 0                             | 1                        | 1                           | 0 Hypothetical protein (1)                                       | -                                                                                                                                                                                                                                                                                                                                                                                                          | -                                                                                                                                                                                                                                                                                    | -                                | C_unihit_01727_mRNA_2.1     | -                              |
| GF0041622 | 0                             | 1                        | 1                           | 0 LRR receptor-like kinase family protein (1)                    | protein binding [GO:0005515 molecular_function] (1)                                                                                                                                                                                                                                                                                                                                                        | Leucine-rich repeat domain, L domain-like [IPR026275] (1); Leucine-rich repeat-containing N-terminal, plant-type [IPR013210] (1); Leucine-rich repeat [IPR001611] (1)                                                                                                                | -                                | C_unihit_01727_mRNA_1.1     | -                              |
| GF0041621 | 0                             | 1                        | 1                           | 0 Hypothetical protein (1)                                       | -                                                                                                                                                                                                                                                                                                                                                                                                          | -                                                                                                                                                                                                                                                                                    | -                                | C_unihit_01726_mRNA_7.1     | -                              |
| GF0041620 | 0                             | 1                        | 1                           | 0 Hypothetical protein (1)                                       | -                                                                                                                                                                                                                                                                                                                                                                                                          | -                                                                                                                                                                                                                                                                                    | -                                | C_unihit_01726_mRNA_3.1     | -                              |
| GF0041619 | 0                             | 1                        | 1                           | 0 Hypothetical protein (1)                                       | -                                                                                                                                                                                                                                                                                                                                                                                                          | -                                                                                                                                                                                                                                                                                    | -                                | C_unihit_01724_mRNA_9.1     | -                              |
| GF0041618 | 0                             | 1                        | 1                           | 0 Hypothetical protein (1)                                       | -                                                                                                                                                                                                                                                                                                                                                                                                          | -                                                                                                                                                                                                                                                                                    | -                                | C_unihit_01724_mRNA_8.1     | -                              |
| GF0041617 | 0                             | 1                        | 1                           | 0 Hypothetical protein (1)                                       | -                                                                                                                                                                                                                                                                                                                                                                                                          | -                                                                                                                                                                                                                                                                                    | -                                | C_unihit_01724_mRNA_5.1     | -                              |
| GF0041616 | 0                             | 1                        | 1                           | 0 Hypothetical protein (1)                                       | -                                                                                                                                                                                                                                                                                                                                                                                                          | -                                                                                                                                                                                                                                                                                    | -                                | C_unihit_01724_mRNA_4.1     | -                              |
| GF0041615 | 0                             | 1                        | 1                           | 0 Hypothetical protein (1)                                       | -                                                                                                                                                                                                                                                                                                                                                                                                          | -                                                                                                                                                                                                                                                                                    | -                                | C_unihit_01724_mRNA_3.1     | -                              |
| GF0041614 | 0                             | 1                        | 1                           | 0 Hypothetical protein (1)                                       | -                                                                                                                                                                                                                                                                                                                                                                                                          | -                                                                                                                                                                                                                                                                                    | -                                | C_unihit_01724_mRNA_2.1     | -                              |
| GF0041613 | 0                             | 1                        | 1                           | 0 Hypothetical protein (1)                                       | -                                                                                                                                                                                                                                                                                                                                                                                                          | -                                                                                                                                                                                                                                                                                    | -                                | C_unihit_01724_mRNA_16.1    | -                              |
| GF0041612 | 0                             | 1                        | 1                           | 0 Phenylcomaran benzylic ether reductase (1)                     | -                                                                                                                                                                                                                                                                                                                                                                                                          | NerA-like domain [IPR000030] (1); NAD(P)-binding domain [IPR016040] (1)                                                                                                                                                                                                              | -                                | C_unihit_01724_mRNA_14.1    | -                              |
| GF0041611 | 0                             | 1                        | 1                           | 0 Hypothetical protein (1)                                       | -                                                                                                                                                                                                                                                                                                                                                                                                          | -                                                                                                                                                                                                                                                                                    | -                                | C_unihit_01724_mRNA_13.1    | -                              |
| GF0041610 | 0                             | 1                        | 1                           | 0 Hypothetical protein (1)                                       | -                                                                                                                                                                                                                                                                                                                                                                                                          | -                                                                                                                                                                                                                                                                                    | -                                | C_unihit_01724_mRNA_12.1    | -                              |
| GF0041609 | 0                             | 1                        | 1                           | 0 Hypothetical protein (1)                                       | -                                                                                                                                                                                                                                                                                                                                                                                                          | -                                                                                                                                                                                                                                                                                    | -                                | C_unihit_01723_mRNA_1.1     | -                              |
| GF0041608 | 0                             | 1                        | 1                           | 0 Hypothetical protein (1)                                       | -                                                                                                                                                                                                                                                                                                                                                                                                          | -                                                                                                                                                                                                                                                                                    | -                                | C_unihit_01719_mRNA_4.1     | -                              |
| GF0041607 | 0                             | 1                        | 1                           | 0 E3 ubiquitin-protein ligase KEG-like protein (1)               | ATP binding [GO:0005524 molecular_function] (1); protein kinase activity [GO:0003672 molecular_function] (1); protein phosphorylation [GO:0006468 biological_process] (1)                                                                                                                                                                                                                                  | Protein kinase-like domain [IPR011009] (1); Protein kinase domain [IPR000719] (1); Serine-threonine/tyrosine-protein kinase catalytic domain [IPR001245] (1)                                                                                                                         | -                                | C_unihit_01717_mRNA_1.2     | -                              |
| GF0041606 | 0                             | 1                        | 1                           | 0 Hypothetical protein (1)                                       | -                                                                                                                                                                                                                                                                                                                                                                                                          | -                                                                                                                                                                                                                                                                                    | -                                | C_unihit_01714_mRNA_3.1     | -                              |
| GF0041605 | 0                             | 1                        | 1                           | 0 General transcription factor 2-related zinc finger protein (1) | nucleic acid binding [GO:0003676 molecular_function] (1)                                                                                                                                                                                                                                                                                                                                                   | Domain of unknown function DUF471 [IPR025388] (1); Ribonuclease H-like domain [IPR012337] (1)                                                                                                                                                                                        | -                                | C_unihit_01714_mRNA_2.1     | -                              |
| GF0041604 | 0                             | 1                        | 1                           | 0 Hypothetical protein (1)                                       | -                                                                                                                                                                                                                                                                                                                                                                                                          | -                                                                                                                                                                                                                                                                                    | -                                | C_unihit_01713_mRNA_5.1     | -                              |
| GF0041603 | 0                             | 1                        | 1                           | 0 DNA sequence with open reading frame (1)                       | -                                                                                                                                                                                                                                                                                                                                                                                                          | Reverse transcription, RNA-dependent DNA polymerase [IPR013103] (1)                                                                                                                                                                                                                  | -                                | C_unihit_01713_mRNA_3.1     | -                              |
| GF0041602 | 0                             | 1                        | 1                           | 0 Hypothetical protein (1)                                       | ADP binding [GO:0043531 molecular_function] (1)                                                                                                                                                                                                                                                                                                                                                            | P-loop containing nucleoside triphosphate hydrolase [IPR027417] (1); NDB-ABC [IPR02182] (1)                                                                                                                                                                                          | -                                | C_unihit_01712_mRNA_5.1     | -                              |
| GF0041601 | 0                             | 1                        | 1                           | 0 Monosaccharide transport protein (1)                           | -                                                                                                                                                                                                                                                                                                                                                                                                          | -                                                                                                                                                                                                                                                                                    | -                                | C_unihit_01712_mRNA_3.1     | -                              |
| GF0041600 | 0                             | 1                        | 1                           | 0 Hypothetical protein (1)                                       | -                                                                                                                                                                                                                                                                                                                                                                                                          | -                                                                                                                                                                                                                                                                                    | -                                | C_unihit_01712_mRNA_2.1     | -                              |
| GF0041599 | 0                             | 1                        | 1                           | 0 Renatransposon protein, putative, Ty1-coaps subclass (1)       | -                                                                                                                                                                                                                                                                                                                                                                                                          | -                                                                                                                                                                                                                                                                                    | -                                | C_unihit_01710_mRNA_5.1     | -                              |
| GF0041598 | 0                             | 1                        | 1                           | 0 Ubiquitin thioesterase OTU1 (1)                                | -                                                                                                                                                                                                                                                                                                                                                                                                          | -                                                                                                                                                                                                                                                                                    | -                                | C_unihit_01709_mRNA_2.1     | -                              |
| GF0041597 | 0                             | 1                        | 1                           | 0 Hypothetical protein (1)                                       | ATP binding [GO:0005524 molecular_function] (1)                                                                                                                                                                                                                                                                                                                                                            | P-loop containing nucleoside triphosphate hydrolase [IPR027417] (1); Helicase superfamily 1/2, ATP-binding domain, DnaG/hacl-type [IPR014013] (1)                                                                                                                                    | -                                | C_unihit_01708_mRNA_9.1     | -                              |
| GF0041596 | 0                             | 1                        | 1                           | 0 Hypothetical protein (1)                                       | peroxidase activity [GO:0004601 molecular_function] (1); oxidation-reduction process [GO:0055114 biological_process] (1); response to oxidative stress [GO:0006979 biological_process] (1); heme binding [GO:0020037 molecular_function] (1)                                                                                                                                                               | Haem peroxidase, plant/fungal/bacterial [IPR02016] (1); Plant peroxidase [IPR000823] (1); Haem peroxidase [IPR010255] (1)                                                                                                                                                            | -                                | C_unihit_01708_mRNA_6.1     | -                              |
| GF0041595 | 0                             | 1                        | 1                           | 0 Hypothetical protein (1)                                       | -                                                                                                                                                                                                                                                                                                                                                                                                          | -                                                                                                                                                                                                                                                                                    | -                                | C_unihit_01707_mRNA_2.1     | -                              |
| GF0041594 | 0                             | 1                        | 1                           | 0 GTP cyclohydrolase 1 (1)                                       | -                                                                                                                                                                                                                                                                                                                                                                                                          | MhSANT-like domain [IPR024752] (1)                                                                                                                                                                                                                                                   | -                                | C_unihit_01706_mRNA_2.1     | -                              |
| GF0041593 | 0                             | 1                        | 1                           | 0 Hypothetical protein (1)                                       | -                                                                                                                                                                                                                                                                                                                                                                                                          | -                                                                                                                                                                                                                                                                                    | -                                | C_unihit_01705_mRNA_6.1     | -                              |
| GF0041592 | 0                             | 1                        | 1                           | 0 Hypothetical protein (1)                                       | -                                                                                                                                                                                                                                                                                                                                                                                                          | -                                                                                                                                                                                                                                                                                    | -                                | C_unihit_01703_mRNA_4.1     | -                              |
| GF0041591 | 0                             | 1                        | 1                           | 0 Hypothetical protein (1)                                       | nucleic acid binding [GO:0003676 molecular_function] (1); zinc ion binding [GO:0008270 molecular_function] (1)                                                                                                                                                                                                                                                                                             | Zinc finger, CCHC-type [IPR001878] (1)                                                                                                                                                                                                                                               | -                                | C_unihit_01703_mRNA_2.1     | -                              |
| GF0041590 | 0                             | 1                        | 1                           | 0 Hypothetical protein (1)                                       | -                                                                                                                                                                                                                                                                                                                                                                                                          | -                                                                                                                                                                                                                                                                                    | -                                | C_unihit_01703_mRNA_1.1     | -                              |
| GF0041589 | 0                             | 1                        | 1                           | 0 Hypothetical protein (1)                                       | -                                                                                                                                                                                                                                                                                                                                                                                                          | -                                                                                                                                                                                                                                                                                    | -                                | C_unihit_01701_mRNA_3.1     | -                              |
| GF0041588 | 0                             | 1                        | 1                           | 0 Hypothetical protein (1)                                       | -                                                                                                                                                                                                                                                                                                                                                                                                          | -                                                                                                                                                                                                                                                                                    | -                                | C_unihit_01699_mRNA_6.1     | -                              |
| GF0041587 | 0                             | 1                        | 1                           | 0 Physulkin receptor (1)                                         | -                                                                                                                                                                                                                                                                                                                                                                                                          | Leucine-rich repeat domain, L domain-like [IPR026275] (1); Leucine-rich repeat-containing N-terminal, plant-type [IPR013210] (1)                                                                                                                                                     | -                                | C_unihit_01698_mRNA_7.1     | -                              |
| GF0041586 | 0                             | 1                        | 1                           | 0 LRR receptor-like kinase family protein (1)                    | protein binding [GO:0005515 molecular_function] (1)                                                                                                                                                                                                                                                                                                                                                        | Leucine-rich repeat domain, L domain-like [IPR026275] (1); Leucine-rich repeat [IPR001611] (1); Leucine-rich repeat-containing N-terminal, plant-type [IPR013210] (1)                                                                                                                | -                                | C_unihit_01698_mRNA_5.1     | -                              |
| GF0041585 | 0                             | 1                        | 1                           | 0 Hypothetical protein (1)                                       | -                                                                                                                                                                                                                                                                                                                                                                                                          | -                                                                                                                                                                                                                                                                                    | -                                | C_unihit_01697_mRNA_2.1     | -                              |
| GF0041584 | 0                             | 1                        | 1                           | 0 Hypothetical protein (1)                                       | nucleic acid binding [GO:0003676 molecular_function] (1); zinc ion binding [GO:0008270 molecular_function] (1)                                                                                                                                                                                                                                                                                             | Zinc finger, CCHC-type [IPR001878] (1)                                                                                                                                                                                                                                               | -                                | C_unihit_01697_mRNA_1.1     | -                              |
| GF0041583 | 0                             | 1                        | 1                           | 0 Hypothetical protein (1)                                       | -                                                                                                                                                                                                                                                                                                                                                                                                          | -                                                                                                                                                                                                                                                                                    | -                                | C_unihit_01696_mRNA_4.1     | -                              |
| GF0041582 | 0                             | 1                        | 1                           | 0 Hypothetical protein (1)                                       | heme binding [GO:0020037 molecular_function] (1); iron ion binding [GO:0005506 molecular_function] (1); oxidation-reduction process [GO:0055114 biological_process] (1); oxidoreductase activity, acting on paired donors, with incorporation or reduction of molecular oxygen [GO:0016765 molecular_function] (1)                                                                                         | Cytochrome P450 [IPR001128] (1)                                                                                                                                                                                                                                                      | -                                | C_unihit_01696_mRNA_3.1     | -                              |
| GF0041581 | 0                             | 1                        | 1                           | 0 Hypothetical protein (1)                                       | -                                                                                                                                                                                                                                                                                                                                                                                                          | -                                                                                                                                                                                                                                                                                    | -                                | C_unihit_01696_mRNA_2.1     | -                              |
| GF0041580 | 0                             | 1                        | 1                           | 0 Hypothetical protein (1)                                       | -                                                                                                                                                                                                                                                                                                                                                                                                          | -                                                                                                                                                                                                                                                                                    | -                                | C_unihit_01696_mRNA_1.1     | -                              |
| GF0041579 | 0                             | 1                        | 1                           | 0 Hypothetical protein (1)                                       | -                                                                                                                                                                                                                                                                                                                                                                                                          | -                                                                                                                                                                                                                                                                                    | -                                | C_unihit_01695_mRNA_8.1     | -                              |
| GF0041578 | 0                             | 1                        | 1                           | 0 Hypothetical protein (1)                                       | -                                                                                                                                                                                                                                                                                                                                                                                                          | -                                                                                                                                                                                                                                                                                    | -                                | C_unihit_01695_mRNA_12.1    | -                              |
| GF0041577 | 0                             | 1                        | 1                           | 0 Hypothetical protein (1)                                       | -                                                                                                                                                                                                                                                                                                                                                                                                          | -                                                                                                                                                                                                                                                                                    | -                                | C_unihit_01695_mRNA_1.1     | -                              |
| GF0041576 | 0                             | 1                        | 1                           | 0 Hypothetical protein (1)                                       | -                                                                                                                                                                                                                                                                                                                                                                                                          | Leucine-rich repeat-containing N-terminal, plant-type [IPR013210] (1); Leucine-rich repeat domain, L domain-like [IPR026275] (1)                                                                                                                                                     | -                                | C_unihit_01694_mRNA_7.1     | -                              |
| GF0041575 | 0                             | 1                        | 1                           | 0 Hypothetical protein (1)                                       | -                                                                                                                                                                                                                                                                                                                                                                                                          | -                                                                                                                                                                                                                                                                                    | -                                | C_unihit_01694_mRNA_5.1     | -                              |

| ID        | Num. in <i>C. crottensteini</i> | Num. in <i>C. caudis</i> | Num. in <i>P. putida</i> | Note                                                               | GO                                                                                                                                                                                                                                                                                                                                                  | InterPro                                                                                                                                                                                                                                                                                                     | Members in <i>C. crottensteini</i> | Members in <i>C. caudis</i> | Members in <i>P. putida</i> |
|-----------|---------------------------------|--------------------------|--------------------------|--------------------------------------------------------------------|-----------------------------------------------------------------------------------------------------------------------------------------------------------------------------------------------------------------------------------------------------------------------------------------------------------------------------------------------------|--------------------------------------------------------------------------------------------------------------------------------------------------------------------------------------------------------------------------------------------------------------------------------------------------------------|------------------------------------|-----------------------------|-----------------------------|
| GF0041574 | 0                               | 1                        | 0                        | Hypothetical protein (1)                                           | deacetylation-dependent decapping of nuclear-transcribed mRNA [GO:0000290] biological_process (1); positive regulation of catalytic activity [GO:0048887 biological_process] (1); enzyme activator activity [GO:0008047 molecular_function] (1)                                                                                                     | PH domain-like [IPRO11993] (1); mRNA-decoupling enzyme subunit 1 [IPRO10334] (1)                                                                                                                                                                                                                             | -                                  | C_umbii_01694_mRNA_3,1      | -                           |
| GF0041573 | 0                               | 1                        | 0                        | Phytohormone receptor 2-like protein (1)                           | home binding [GO:002037 molecular_function] (1); iron ion binding [GO:0005506 molecular_function] (1); oxidation-reduction process [GO:005514 biological_process] (1); oxidoreductase activity, acting on paired donors, with incorporation or reduction of molecular oxygen [GO:0016765 molecular_function] (1)                                    | Leucine-rich repeat-containing N-terminal plant-type [IPRO13210] (1); Leucine-rich repeat domain, L domain-like [IPRO12675] (1)                                                                                                                                                                              | -                                  | C_umbii_01694_mRNA_1,1      | -                           |
| GF0041572 | 0                               | 1                        | 0                        | Hypothetical protein (1)                                           | ATP binding [GO:005524 molecular_function] (1); protein kinase activity [GO:0004672 molecular_function] (1); protein phosphorylation [GO:0006468 biological_process] (1); ATP binding [GO:0005524 molecular_function] (1); protein kinase activity [GO:0004672 molecular_function] (1); protein phosphorylation [GO:0006468 biological_process] (1) | Reverse transcriptase, RNA-dependent DNA polymerase [IPRO13103] (1); Cytochrome P450 [IPRO1128] (1)                                                                                                                                                                                                          | -                                  | C_umbii_01693_mRNA_4,1      | -                           |
| GF0041571 | 0                               | 1                        | 0                        | Hypothetical protein (1)                                           | -                                                                                                                                                                                                                                                                                                                                                   | -                                                                                                                                                                                                                                                                                                            | -                                  | C_umbii_01693_mRNA_1,1      | -                           |
| GF0041569 | 0                               | 1                        | 0                        | Hypothetical protein (1)                                           | -                                                                                                                                                                                                                                                                                                                                                   | Bulb-type lectin domain [IPRO11480] (1)                                                                                                                                                                                                                                                                      | -                                  | C_umbii_01692_mRNA_4,1      | -                           |
| GF0041568 | 0                               | 1                        | 0                        | Hypothetical protein (1)                                           | -                                                                                                                                                                                                                                                                                                                                                   | GAG-pro-integrase domain [IPRO25724] (1)                                                                                                                                                                                                                                                                     | -                                  | C_umbii_01692_mRNA_3,1      | -                           |
| GF0041567 | 0                               | 1                        | 0                        | Hypothetical protein (1)                                           | -                                                                                                                                                                                                                                                                                                                                                   | -                                                                                                                                                                                                                                                                                                            | -                                  | C_umbii_01692_mRNA_1,1      | -                           |
| GF0041566 | 0                               | 1                        | 0                        | Hypothetical protein (1)                                           | protein kinase activity [GO:0004672 molecular_function] (1); protein phosphorylation [GO:0006468 biological_process] (1); ATP binding [GO:0005524 molecular_function] (1)                                                                                                                                                                           | Protein kinase domain [IPRO0719] (1); Reverse transcriptase domain [IPRO04477] (1); Protein kinase-like domain [IPRO11099] (1)                                                                                                                                                                               | -                                  | C_umbii_01691_mRNA_7,1      | -                           |
| GF0041565 | 0                               | 1                        | 0                        | Hypothetical protein (1)                                           | ATP binding [GO:005524 molecular_function] (1); protein kinase activity [GO:0004672 molecular_function] (1); protein phosphorylation [GO:0006468 biological_process] (1)                                                                                                                                                                            | Protein kinase-like domain [IPRO11009] (1); Protein kinase domain [IPRO00719] (1); Serine-threonine/tyrosine-protein kinase catalytic domain [IPRO1245] (1); Serine/threonine-protein kinase, active site [IPRO08271] (1); Serine/threonine/dual specificity protein kinase, catalytic domain [IPRO2290] (1) | -                                  | C_umbii_01691_mRNA_6,1      | -                           |
| GF0041564 | 0                               | 1                        | 0                        | Hypothetical protein (1)                                           | -                                                                                                                                                                                                                                                                                                                                                   | -                                                                                                                                                                                                                                                                                                            | -                                  | C_umbii_01691_mRNA_4,1      | -                           |
| GF0041563 | 0                               | 1                        | 0                        | Hypothetical protein (1)                                           | protein binding [GO:005515 molecular_function] (1)                                                                                                                                                                                                                                                                                                  | Leucine-rich repeat domain, L domain-like [IPRO12975] (1); Leucine-rich repeat [IPRO1611] (1)                                                                                                                                                                                                                | -                                  | C_umbii_01691_mRNA_2,1      | -                           |
| GF0041562 | 0                               | 1                        | 0                        | Hypothetical protein (1)                                           | protein binding [GO:005515 molecular_function] (1)                                                                                                                                                                                                                                                                                                  | SH3 domain [IPRO1452] (1)                                                                                                                                                                                                                                                                                    | -                                  | C_umbii_01691_mRNA_1,1      | -                           |
| GF0041561 | 0                               | 1                        | 0                        | Hypothetical protein (1)                                           | -                                                                                                                                                                                                                                                                                                                                                   | -                                                                                                                                                                                                                                                                                                            | -                                  | C_umbii_01690_mRNA_8,1      | -                           |
| GF0041560 | 0                               | 1                        | 0                        | Hypothetical protein (1)                                           | -                                                                                                                                                                                                                                                                                                                                                   | -                                                                                                                                                                                                                                                                                                            | -                                  | C_umbii_01690_mRNA_1,1      | -                           |
| GF0041559 | 0                               | 1                        | 0                        | Hypothetical protein (1)                                           | -                                                                                                                                                                                                                                                                                                                                                   | Dd-1 Pgp [IPRO02818] (1); Class I glutamine amidotransferase-like [IPRO2962] (1)                                                                                                                                                                                                                             | -                                  | C_umbii_01688_mRNA_6,1      | -                           |
| GF0041558 | 0                               | 1                        | 0                        | LRR receptor-like kinase family protein (1)                        | protein binding [GO:005515 molecular_function] (1)                                                                                                                                                                                                                                                                                                  | Leucine-rich repeat [IPRO1611] (1); Leucine-rich repeat, typical subtype [IPRO0591] (1); Protein kinase-like domain [IPRO11009] (1); Leucine-rich repeat domain, L domain-like [IPRO12675] (1)                                                                                                               | -                                  | C_umbii_01688_mRNA_4,1      | -                           |
| GF0041557 | 0                               | 1                        | 0                        | 4-methyl-5(β-hydroxyethyl)-thiazole monophosphate biosynthesis (1) | -                                                                                                                                                                                                                                                                                                                                                   | Class I glutamine amidotransferase-like [IPRO2962] (1); Dd-1 Pgp [IPRO02818] (1)                                                                                                                                                                                                                             | -                                  | C_umbii_01688_mRNA_3,1      | -                           |
| GF0041556 | 0                               | 1                        | 0                        | LRR receptor-like kinase (1)                                       | protein binding [GO:005515 molecular_function] (1); ATP binding [GO:0005524 molecular_function] (1); protein phosphorylation [GO:0006468 biological_process] (1); protein kinase activity [GO:0004672 molecular_function] (1)                                                                                                                       | Leucine-rich repeat [IPRO1611] (1); Serine/threonine/tyrosine-protein kinase, active site [IPRO08271] (1); Protein kinase-like domain [IPRO11009] (1); Leucine-rich repeat domain, L domain-like [IPRO12675] (1); Leucine-rich repeat, typical subtype [IPRO0591] (1); Protein kinase domain [IPRO0719] (1)  | -                                  | C_umbii_01688_mRNA_1,1      | -                           |
| GF0041555 | 0                               | 1                        | 0                        | Hypothetical protein (1)                                           | -                                                                                                                                                                                                                                                                                                                                                   | -                                                                                                                                                                                                                                                                                                            | -                                  | C_umbii_01687_mRNA_9,1      | -                           |
| GF0041554 | 0                               | 1                        | 0                        | Hypothetical protein (1)                                           | -                                                                                                                                                                                                                                                                                                                                                   | -                                                                                                                                                                                                                                                                                                            | -                                  | C_umbii_01687_mRNA_6,1      | -                           |
| GF0041553 | 0                               | 1                        | 0                        | Hypothetical protein (1)                                           | -                                                                                                                                                                                                                                                                                                                                                   | -                                                                                                                                                                                                                                                                                                            | -                                  | C_umbii_01687_mRNA_3,1      | -                           |
| GF0041552 | 0                               | 1                        | 0                        | Hypothetical protein (1)                                           | -                                                                                                                                                                                                                                                                                                                                                   | -                                                                                                                                                                                                                                                                                                            | -                                  | C_umbii_01687_mRNA_2,1      | -                           |
| GF0041551 | 0                               | 1                        | 0                        | RPS2 protein (1)                                                   | ADP binding [GO:0043531 molecular_function] (1)                                                                                                                                                                                                                                                                                                     | P-loop containing nucleoside triphosphate hydrolase [IPRO27417] (1); NB-ARC [IPRO2182] (1); Leucine-rich repeat domain, L domain-like [IPRO12675] (1)                                                                                                                                                        | -                                  | C_umbii_01686_mRNA_7,1      | -                           |
| GF0041550 | 0                               | 1                        | 0                        | Hypothetical protein (1)                                           | -                                                                                                                                                                                                                                                                                                                                                   | -                                                                                                                                                                                                                                                                                                            | -                                  | C_umbii_01686_mRNA_5,1      | -                           |
| GF0041549 | 0                               | 1                        | 0                        | Hypothetical protein (1)                                           | -                                                                                                                                                                                                                                                                                                                                                   | -                                                                                                                                                                                                                                                                                                            | -                                  | C_umbii_01686_mRNA_4,1      | -                           |
| GF0041548 | 0                               | 1                        | 0                        | Hypothetical protein (1)                                           | -                                                                                                                                                                                                                                                                                                                                                   | -                                                                                                                                                                                                                                                                                                            | -                                  | C_umbii_01685_mRNA_2,1      | -                           |
| GF0041547 | 0                               | 1                        | 0                        | Hypothetical protein (1)                                           | -                                                                                                                                                                                                                                                                                                                                                   | -                                                                                                                                                                                                                                                                                                            | -                                  | C_umbii_01684_mRNA_3,1      | -                           |
| GF0041546 | 0                               | 1                        | 0                        | Superoxide dismutase [Cu-Zn] (1)                                   | metal ion binding [GO:0046872 molecular_function] (1); superoxide metabolic process [GO:0006060 biological_process] (1); superoxide dismutase activity [GO:0004784 molecular_function] (1); oxidation-reduction process [GO:0055114 biological_process] (1)                                                                                         | Superoxide dismutase (Cu/Zn) [IPRO2414] (1); Superoxide dismutase, copper/zinc binding domain [IPRO01424] (1); Superoxide dismutase, copper/zinc binding site [IPRO18152] (1)                                                                                                                                | -                                  | C_umbii_01683_mRNA_1,1      | -                           |
| GF0041545 | 0                               | 1                        | 0                        | Leucine copper protein (1)                                         | -                                                                                                                                                                                                                                                                                                                                                   | Domain of unknown function DUF630 [IPRO06868] (1); Domain of unknown function DUF632 [IPRO06867] (1)                                                                                                                                                                                                         | -                                  | C_umbii_01681_mRNA_8,1      | -                           |
| GF0041544 | 0                               | 1                        | 0                        | Hypothetical protein (1)                                           | catalytic activity [GO:0003824 molecular_function] (1); intramolecular transferase activity, phosphotransferases [GO:0016868 molecular_function] (1); metabolic process [GO:0008152 biological_process] (1); glycolytic process [GO:0006969 biological_process] (1); phosphoglycerate mutase activity [GO:0004619 molecular_function] (1)           | Phosphoglycerate/bisphosphoglycerate mutase, active site [IPRO1343] (1); Histidine phosphatase superfamily, clade 1 [IPRO1307] (1); Phosphoglycerate mutase 1 [IPRO0992] (1); Histidine phosphatase superfamily [IPRO29033] (1)                                                                              | -                                  | C_umbii_01681_mRNA_3,1      | -                           |
| GF0041543 | 0                               | 1                        | 0                        | Hypothetical protein (1)                                           | -                                                                                                                                                                                                                                                                                                                                                   | -                                                                                                                                                                                                                                                                                                            | -                                  | C_umbii_01681_mRNA_1,1      | -                           |
| GF0041542 | 0                               | 1                        | 0                        | Hypothetical protein (1)                                           | -                                                                                                                                                                                                                                                                                                                                                   | -                                                                                                                                                                                                                                                                                                            | -                                  | C_umbii_01680_mRNA_8,1      | -                           |
| GF0041541 | 0                               | 1                        | 0                        | Peroxidase 4 (1)                                                   | oxidation-reduction process [GO:005514 biological_process] (1); peroxidase activity [GO:0004601 molecular_function] (1); response to oxidative stress [GO:0006979 biological_process] (1); heme binding [GO:002037 molecular_function] (1)                                                                                                          | Hem peroxidase, plant/fungal/bacterial [IPRO20210] (1); Plant peroxidase [IPRO0823] (1); Peroxidases heme-binding site [IPRO19793] (1); Peroxidase, active site [IPRO19794] (1); Hem peroxidase [IPRO10255] (1)                                                                                              | -                                  | C_umbii_01680_mRNA_4,1      | -                           |
| GF0041540 | 0                               | 1                        | 0                        | Hypothetical protein (1)                                           | -                                                                                                                                                                                                                                                                                                                                                   | -                                                                                                                                                                                                                                                                                                            | -                                  | C_umbii_01680_mRNA_2,1      | -                           |
| GF0041539 | 0                               | 1                        | 0                        | Hypothetical protein (1)                                           | -                                                                                                                                                                                                                                                                                                                                                   | -                                                                                                                                                                                                                                                                                                            | -                                  | C_umbii_01680_mRNA_13,1     | -                           |
| GF0041538 | 0                               | 1                        | 0                        | Hypothetical protein (1)                                           | -                                                                                                                                                                                                                                                                                                                                                   | -                                                                                                                                                                                                                                                                                                            | -                                  | C_umbii_01680_mRNA_1,1      | -                           |
| GF0041537 | 0                               | 1                        | 0                        | Hypothetical protein (1)                                           | -                                                                                                                                                                                                                                                                                                                                                   | -                                                                                                                                                                                                                                                                                                            | -                                  | C_umbii_01679_mRNA_8,1      | -                           |
| GF0041536 | 0                               | 1                        | 0                        | Hypothetical protein (1)                                           | -                                                                                                                                                                                                                                                                                                                                                   | -                                                                                                                                                                                                                                                                                                            | -                                  | C_umbii_01677_mRNA_9,1      | -                           |
| GF0041535 | 0                               | 1                        | 0                        | Hypothetical protein (1)                                           | -                                                                                                                                                                                                                                                                                                                                                   | -                                                                                                                                                                                                                                                                                                            | -                                  | C_umbii_01677_mRNA_5,1      | -                           |
| GF0041534 | 0                               | 1                        | 0                        | Hypothetical protein (1)                                           | -                                                                                                                                                                                                                                                                                                                                                   | -                                                                                                                                                                                                                                                                                                            | -                                  | C_umbii_01677_mRNA_4,1      | -                           |
| GF0041533 | 0                               | 1                        | 0                        | Hypothetical protein (1)                                           | -                                                                                                                                                                                                                                                                                                                                                   | -                                                                                                                                                                                                                                                                                                            | -                                  | C_umbii_01677_mRNA_10,1     | -                           |
| GF0041532 | 0                               | 1                        | 0                        | Hypothetical protein (1)                                           | -                                                                                                                                                                                                                                                                                                                                                   | -                                                                                                                                                                                                                                                                                                            | -                                  | C_umbii_01677_mRNA_1,1      | -                           |
| GF0041531 | 0                               | 1                        | 0                        | Hypothetical protein (1)                                           | -                                                                                                                                                                                                                                                                                                                                                   | -                                                                                                                                                                                                                                                                                                            | -                                  | C_umbii_01676_mRNA_3,1      | -                           |
| GF0041530 | 0                               | 1                        | 0                        | Hypothetical protein (1)                                           | -                                                                                                                                                                                                                                                                                                                                                   | Heat shock protein 70kD, C-terminal domain [IPRO29048] (1)                                                                                                                                                                                                                                                   | -                                  | C_umbii_01676_mRNA_2,1      | -                           |
| GF0041529 | 0                               | 1                        | 0                        | Hypothetical protein (1)                                           | -                                                                                                                                                                                                                                                                                                                                                   | Heat shock protein 70, conserved site [IPRO1311] (1); Heat shock protein 70 family [IPRO13126] (1); Heat shock protein 70kD, peptide-binding domain [IPRO29471] (1)                                                                                                                                          | -                                  | C_umbii_01676_mRNA_1,1      | -                           |
| GF0041528 | 0                               | 1                        | 0                        | Hypothetical protein (1)                                           | nucleic acid binding [GO:0003676 molecular_function] (1)                                                                                                                                                                                                                                                                                            | Ribonuclease H-like domain [IPRO12337] (1)                                                                                                                                                                                                                                                                   | -                                  | C_umbii_01675_mRNA_1,1      | -                           |
| GF0041527 | 0                               | 1                        | 0                        | Hypothetical protein (1)                                           | -                                                                                                                                                                                                                                                                                                                                                   | -                                                                                                                                                                                                                                                                                                            | -                                  | C_umbii_01674_mRNA_5,1      | -                           |
| GF0041526 | 0                               | 1                        | 0                        | Hypothetical protein (1)                                           | protein binding [GO:005515 molecular_function] (1)                                                                                                                                                                                                                                                                                                  | Glutathione S-transferase, N-terminal [IPRO0405] (1); Glutathione S-transferase, C-terminal-like [IPRO10987] (1); Thiorodoxin-like fold [IPRO12336] (1); Glutathione S-transferase, C-terminal [IPRO0406] (1)                                                                                                | -                                  | C_umbii_01674_mRNA_4,1      | -                           |
| GF0041525 | 0                               | 1                        | 0                        | Hypothetical protein (1)                                           | -                                                                                                                                                                                                                                                                                                                                                   | -                                                                                                                                                                                                                                                                                                            | -                                  | C_umbii_01674_mRNA_1,1      | -                           |
| GF0041524 | 0                               | 1                        | 0                        | Hypothetical protein (1)                                           | DNA binding [GO:0003677 molecular_function] (1); nucleic acid binding [GO:0003676 molecular_function] (1); protein dimerization activity [GO:0046983 molecular_function] (1)                                                                                                                                                                        | Ribonuclease H-like domain [IPRO12337] (1); Zinc finger, BED-type [IPRO03656] (1); HAT, C-terminal dimerization domain [IPRO0906] (1)                                                                                                                                                                        | -                                  | C_umbii_01673_mRNA_3,1      | -                           |
| GF0041523 | 0                               | 1                        | 0                        | Hypothetical protein (1)                                           | -                                                                                                                                                                                                                                                                                                                                                   | -                                                                                                                                                                                                                                                                                                            | -                                  | C_umbii_01673_mRNA_1,1      | -                           |
| GF0041522 | 0                               | 1                        | 0                        | Hypothetical protein (1)                                           | -                                                                                                                                                                                                                                                                                                                                                   | -                                                                                                                                                                                                                                                                                                            | -                                  | C_umbii_01672_mRNA_7,1      | -                           |
| GF0041521 | 0                               | 1                        | 0                        | Hypothetical protein (1)                                           | -                                                                                                                                                                                                                                                                                                                                                   | -                                                                                                                                                                                                                                                                                                            | -                                  | C_umbii_01671_mRNA_9,1      | -                           |
| GF0041520 | 0                               | 1                        | 0                        | Hypothetical protein (1)                                           | -                                                                                                                                                                                                                                                                                                                                                   | -                                                                                                                                                                                                                                                                                                            | -                                  | C_umbii_01671_mRNA_8,1      | -                           |
| GF0041519 | 0                               | 1                        | 0                        | Hypothetical protein (1)                                           | -                                                                                                                                                                                                                                                                                                                                                   | -                                                                                                                                                                                                                                                                                                            | -                                  | C_umbii_01671_mRNA_2,1      | -                           |
| GF0041518 | 0                               | 1                        | 0                        | Hypothetical protein (1)                                           | -                                                                                                                                                                                                                                                                                                                                                   | -                                                                                                                                                                                                                                                                                                            | -                                  | C_umbii_01671_mRNA_1,1      | -                           |
| GF0041517 | 0                               | 1                        | 0                        | Hypothetical protein (1)                                           | nucleic acid binding [GO:0003676 molecular_function] (1)                                                                                                                                                                                                                                                                                            | Ribonuclease H-like domain [IPRO12337] (1)                                                                                                                                                                                                                                                                   | -                                  | C_umbii_01670_mRNA_2,1      | -                           |
| GF0041516 | 0                               | 1                        | 0                        | Hypothetical protein (1)                                           | -                                                                                                                                                                                                                                                                                                                                                   | -                                                                                                                                                                                                                                                                                                            | -                                  | C_umbii_01669_mRNA_5,1      | -                           |
| GF0041515 | 0                               | 1                        | 0                        | Hypothetical protein (1)                                           | -                                                                                                                                                                                                                                                                                                                                                   | -                                                                                                                                                                                                                                                                                                            | -                                  | C_umbii_01669_mRNA_1,1      | -                           |
| GF0041514 | 0                               | 1                        | 0                        | Hypothetical protein (1)                                           | -                                                                                                                                                                                                                                                                                                                                                   | -                                                                                                                                                                                                                                                                                                            | -                                  | C_umbii_01668_mRNA_3,1      | -                           |
| GF0041513 | 0                               | 1                        | 0                        | Hypothetical protein (1)                                           | -                                                                                                                                                                                                                                                                                                                                                   | -                                                                                                                                                                                                                                                                                                            | -                                  | C_umbii_01666_mRNA_1,1      | -                           |
| GF0041512 | 0                               | 1                        | 0                        | Hypothetical protein (1)                                           | -                                                                                                                                                                                                                                                                                                                                                   | TB2/DPI/HVA22-related protein [IPRO04345] (1)                                                                                                                                                                                                                                                                | -                                  | C_umbii_01667_mRNA_2,1      | -                           |
| GF0041511 | 0                               | 1                        | 0                        | Hypothetical protein (1)                                           | -                                                                                                                                                                                                                                                                                                                                                   | -                                                                                                                                                                                                                                                                                                            | -                                  | C_umbii_01667_mRNA_1,1      | -                           |
| GF0041510 | 0                               | 1                        | 0                        | Hypothetical protein (1)                                           | -                                                                                                                                                                                                                                                                                                                                                   | -                                                                                                                                                                                                                                                                                                            | -                                  | C_umbii_01666_mRNA_9,1      | -                           |
| GF0041509 | 0                               | 1                        | 0                        | Hypothetical protein (1)                                           | -                                                                                                                                                                                                                                                                                                                                                   | Viral movement protein [IPRO28919] (1)                                                                                                                                                                                                                                                                       | -                                  | C_umbii_01666_mRNA_8,1      | -                           |
| GF0041508 | 0                               | 1                        | 0                        | Hypothetical protein (1)                                           | -                                                                                                                                                                                                                                                                                                                                                   | -                                                                                                                                                                                                                                                                                                            | -                                  | C_umbii_01666_mRNA_4,1      | -                           |
| GF0041507 | 0                               | 1                        | 0                        | Hypothetical protein (1)                                           | -                                                                                                                                                                                                                                                                                                                                                   | -                                                                                                                                                                                                                                                                                                            | -                                  | C_umbii_01666_mRNA_1,1      | -                           |
| GF0041506 | 0                               | 1                        | 0                        | Hypothetical protein (1)                                           | -                                                                                                                                                                                                                                                                                                                                                   | -                                                                                                                                                                                                                                                                                                            | -                                  | C_umbii_01665_mRNA_4,1      | -                           |
| GF0041505 | 0                               | 1                        | 0                        | ABC(loading protein) family transporter: polyanine (1)             | -                                                                                                                                                                                                                                                                                                                                                   | -                                                                                                                                                                                                                                                                                                            | -                                  | C_umbii_01664_mRNA_5,1      | -                           |

| ID        | Num. in <i>C. crottensteini</i> | Num. in <i>C. auris</i> | Num. in <i>P. putida</i> | Note                                                                                    | GO                                                                                                                                                                                                                             | InterPro                                                                                                                                                                                                                                                                          | Members in <i>C. crottensteini</i> | Members in <i>C. auris</i> | Members in <i>P. putida</i> |
|-----------|---------------------------------|-------------------------|--------------------------|-----------------------------------------------------------------------------------------|--------------------------------------------------------------------------------------------------------------------------------------------------------------------------------------------------------------------------------|-----------------------------------------------------------------------------------------------------------------------------------------------------------------------------------------------------------------------------------------------------------------------------------|------------------------------------|----------------------------|-----------------------------|
| GF0041504 | 0                               | 1                       | 1                        | 0 SHE3 domain-containing protein 1 (1)                                                  |                                                                                                                                                                                                                                |                                                                                                                                                                                                                                                                                   |                                    | C_ush1i_01664_mRNA_3.1     | -                           |
| GF0041503 | 0                               | 1                       | 1                        | 0 LRR receptor-like serine/threonine-protein kinase GS01 (1)                            | protein binding [GO:0005515 molecular_function] (1)                                                                                                                                                                            | Leucine-rich repeat, typical subtype [IPRO03591] (1); Leucine-rich repeat domain, L domain-like [IPRO2675] (1); Leucine-rich repeat [IPRO1611] (1); Leucine-rich repeat domain, L domain-like [IPRO2675] (1)                                                                      |                                    | C_ush1i_01664_mRNA_2.1     | -                           |
| GF0041502 | 0                               | 1                       | 1                        | 0 Hypothetical protein (1)                                                              |                                                                                                                                                                                                                                |                                                                                                                                                                                                                                                                                   |                                    | C_ush1i_01664_mRNA_1.1     | -                           |
| GF0041501 | 0                               | 1                       | 1                        | 0 Hypothetical protein (1)                                                              |                                                                                                                                                                                                                                |                                                                                                                                                                                                                                                                                   |                                    | C_ush1i_01662_mRNA_5.1     | -                           |
| GF0041500 | 0                               | 1                       | 1                        | 0 Hypothetical protein (1)                                                              |                                                                                                                                                                                                                                |                                                                                                                                                                                                                                                                                   |                                    | C_ush1i_01663_mRNA_4.1     | -                           |
| GF0041499 | 0                               | 1                       | 1                        | 0 Hypothetical protein (1)                                                              |                                                                                                                                                                                                                                |                                                                                                                                                                                                                                                                                   |                                    | C_ush1i_01663_mRNA_3.1     | -                           |
| GF0041498 | 0                               | 1                       | 1                        | 0 L-type lectin-domain containing receptor kinase IX.1 (1)                              |                                                                                                                                                                                                                                | Protein kinase-like domain [IPRO11009] (1)                                                                                                                                                                                                                                        |                                    | C_ush1i_01662_mRNA_3.1     | -                           |
| GF0041497 | 0                               | 1                       | 1                        | 0 Ankyrin repeat plant-like protein (1)                                                 | nucleic acid binding [GO:0003676 molecular_function] (1); protein binding [GO:0005515 molecular_function] (1); zinc ion binding [GO:0008270 molecular_function] (1)                                                            | Ankyrin repeat [IPRO02110] (1); PGK domain [IPRO2696] (1); Zinc finger, CXXC-type [IPRO1970] (1); Ankyrin repeat-containing domain [IPRO2068] (1); Zinc knuckle CXXC4HX4C [IPRO2836] (1)                                                                                          |                                    | C_ush1i_01661_mRNA_3.1     | -                           |
| GF0041496 | 0                               | 1                       | 1                        | 0 Hypothetical protein (1)                                                              |                                                                                                                                                                                                                                |                                                                                                                                                                                                                                                                                   |                                    | C_ush1i_01660_mRNA_5.1     | -                           |
| GF0041495 | 0                               | 1                       | 1                        | 0 Hypothetical protein (1)                                                              |                                                                                                                                                                                                                                |                                                                                                                                                                                                                                                                                   |                                    | C_ush1i_01660_mRNA_2.1     | -                           |
| GF0041494 | 0                               | 1                       | 1                        | 0 Hypothetical protein (1)                                                              |                                                                                                                                                                                                                                |                                                                                                                                                                                                                                                                                   |                                    | C_ush1i_01659_mRNA_8.1     | -                           |
| GF0041493 | 0                               | 1                       | 1                        | 0 Hypothetical protein (1)                                                              |                                                                                                                                                                                                                                |                                                                                                                                                                                                                                                                                   |                                    | C_ush1i_01659_mRNA_4.1     | -                           |
| GF0041492 | 0                               | 1                       | 1                        | 0 Hypothetical protein (1)                                                              |                                                                                                                                                                                                                                |                                                                                                                                                                                                                                                                                   |                                    | C_ush1i_01659_mRNA_2.1     | -                           |
| GF0041491 | 0                               | 1                       | 1                        | 0 Hypothetical protein (1)                                                              |                                                                                                                                                                                                                                |                                                                                                                                                                                                                                                                                   |                                    | C_ush1i_01658_mRNA_3.1     | -                           |
| GF0041490 | 0                               | 1                       | 1                        | 0 NBS-LRR type disease resistance protein (1)                                           | NBS-LRR type disease resistance protein ADP binding [GO:0043531 molecular_function] (1)                                                                                                                                        | AAA+ ATPase domain [IPRO03593] (1); NB-ARC [IPRO02182] (1); P-loop containing nucleoside triphosphate hydrolase [IPRO2747] (1)                                                                                                                                                    |                                    | C_ush1i_01658_mRNA_2.1     | -                           |
| GF0041489 | 0                               | 1                       | 1                        | 0 Disease resistance RPS5-like protein (1)                                              |                                                                                                                                                                                                                                | Leucine-rich repeat domain, L domain-like [IPRO2675] (1)                                                                                                                                                                                                                          |                                    | C_ush1i_01658_mRNA_1.1     | -                           |
| GF0041488 | 0                               | 1                       | 1                        | 0 Hypothetical protein (1)                                                              |                                                                                                                                                                                                                                |                                                                                                                                                                                                                                                                                   |                                    | C_ush1i_01657_mRNA_5.1     | -                           |
| GF0041487 | 0                               | 1                       | 1                        | 0 Hypothetical protein (1)                                                              |                                                                                                                                                                                                                                |                                                                                                                                                                                                                                                                                   |                                    | C_ush1i_01657_mRNA_3.1     | -                           |
| GF0041486 | 0                               | 1                       | 1                        | 0 Hypothetical protein (1)                                                              | RNA-directed RNA polymerase activity [GO:0003968 molecular_function] (1)                                                                                                                                                       | RNA-dependent RNA polymerase, eukaryotic-type [IPRO07855] (1)                                                                                                                                                                                                                     |                                    | C_ush1i_01657_mRNA_2.1     | -                           |
| GF0041485 | 0                               | 1                       | 1                        | 0 Hypothetical protein (1)                                                              |                                                                                                                                                                                                                                |                                                                                                                                                                                                                                                                                   |                                    | C_ush1i_01657_mRNA_1.1     | -                           |
| GF0041484 | 0                               | 1                       | 1                        | 0 Disease resistance protein (TIR-NBS-LRR class) (1)                                    | ADP binding [GO:0043531 molecular_function] (1)                                                                                                                                                                                | NB-ARC [IPRO02182] (1); P-loop containing nucleoside triphosphate hydrolase [IPRO2747] (1); Winged helix-helix DNA-binding domain [IPRO1199] (1)                                                                                                                                  |                                    | C_ush1i_01656_mRNA_2.1     | -                           |
| GF0041483 | 0                               | 1                       | 1                        | 0 Hydrolase, alpha/beta domain protein (1)                                              |                                                                                                                                                                                                                                | Alpha/beta hydrolase fold-1 [IPRO00073] (1); Alpha/beta hydrolase fold [IPRO2696] (1)                                                                                                                                                                                             |                                    | C_ush1i_01656_mRNA_1.1     | -                           |
| GF0041482 | 0                               | 1                       | 1                        | 0 Hypothetical protein (1)                                                              | ATP binding [GO:0005524 molecular_function] (1); protein phosphorylation [GO:0006468 biological_process] (1); protein kinase activity [GO:0006072 molecular_function] (1); protein binding [GO:0005515 molecular_function] (1) | Leucine-rich repeat [IPRO1611] (1); Leucine-rich repeat-containing N-terminal, plant-type [IPRO13210] (1); Protein kinase-like domain [IPRO11009] (1); Leucine-rich repeat domain, L domain-like [IPRO2675] (1); Protein kinase domain [IPRO0719] (1)                             |                                    | C_ush1i_01654_mRNA_4.1     | -                           |
| GF0041481 | 0                               | 1                       | 1                        | 0 Hypothetical protein (1)                                                              |                                                                                                                                                                                                                                | HAD-like domain [IPRO2234] (1); HAD-superfamily hydrolase, subfamily I; 5'-nucleotidase [IPRO08380] (1)                                                                                                                                                                           |                                    | C_ush1i_01654_mRNA_2.1     | -                           |
| GF0041480 | 0                               | 1                       | 1                        | 0 Polycomb group RING finger protein 3 (1)                                              | zinc ion binding [GO:0008270 molecular_function] (1); metal ion binding [GO:0046872 molecular_function] (1); protein binding [GO:0005515 molecular_function] (1)                                                               | Zinc finger, RING-type, conserved site [IPRO17907] (1); Zinc finger, RING-type [IPRO01841] (1); Zinc finger, RING-type [IPRO17907] (1); Zinc finger, RING-type [IPRO13083] (1); Zinc finger, CH1C4 RING-type [IPRO18957] (1)                                                      |                                    | C_ush1i_01653_mRNA_1.1     | -                           |
| GF0041479 | 0                               | 1                       | 1                        | 0 Hypothetical protein (1)                                                              |                                                                                                                                                                                                                                |                                                                                                                                                                                                                                                                                   |                                    | C_ush1i_01652_mRNA_5.1     | -                           |
| GF0041478 | 0                               | 1                       | 1                        | 0 Hypothetical protein (1)                                                              |                                                                                                                                                                                                                                |                                                                                                                                                                                                                                                                                   |                                    | C_ush1i_01652_mRNA_1.1     | -                           |
| GF0041477 | 0                               | 1                       | 1                        | 0 Extracellular calcium sensing receptor (1)                                            |                                                                                                                                                                                                                                | Rhodanese-like domain [IPRO01763] (1)                                                                                                                                                                                                                                             |                                    | C_ush1i_01651_mRNA_1.1     | -                           |
| GF0041476 | 0                               | 1                       | 1                        | 0 Hypothetical protein (1)                                                              |                                                                                                                                                                                                                                |                                                                                                                                                                                                                                                                                   |                                    | C_ush1i_01650_mRNA_1.1     | -                           |
| GF0041475 | 0                               | 1                       | 1                        | 0 Hypothetical protein (1)                                                              |                                                                                                                                                                                                                                |                                                                                                                                                                                                                                                                                   |                                    | C_ush1i_01649_mRNA_8.1     | -                           |
| GF0041474 | 0                               | 1                       | 1                        | 0 Hypothetical protein (1)                                                              |                                                                                                                                                                                                                                |                                                                                                                                                                                                                                                                                   |                                    | C_ush1i_01649_mRNA_3.1     | -                           |
| GF0041473 | 0                               | 1                       | 1                        | 0 Hypothetical protein (1)                                                              |                                                                                                                                                                                                                                |                                                                                                                                                                                                                                                                                   |                                    | C_ush1i_01648_mRNA_6.1     | -                           |
| GF0041472 | 0                               | 1                       | 1                        | 0 Putative serine/threonine-protein kinase WNK4 (1)                                     |                                                                                                                                                                                                                                |                                                                                                                                                                                                                                                                                   |                                    | C_ush1i_01648_mRNA_4.1     | -                           |
| GF0041471 | 0                               | 1                       | 1                        | 0 Hypothetical protein (1)                                                              |                                                                                                                                                                                                                                |                                                                                                                                                                                                                                                                                   |                                    | C_ush1i_01646_mRNA_9.1     | -                           |
| GF0041470 | 0                               | 1                       | 1                        | 0 Hypothetical protein (1)                                                              |                                                                                                                                                                                                                                |                                                                                                                                                                                                                                                                                   |                                    | C_ush1i_01646_mRNA_8.1     | -                           |
| GF0041469 | 0                               | 1                       | 1                        | 0 Hypothetical protein (1)                                                              |                                                                                                                                                                                                                                |                                                                                                                                                                                                                                                                                   |                                    | C_ush1i_01646_mRNA_6.1     | -                           |
| GF0041468 | 0                               | 1                       | 1                        | 0 LRR receptor-like serine/threonine-protein kinase GS01 (1)                            | protein binding [GO:0005515 molecular_function] (1)                                                                                                                                                                            | Leucine-rich repeat, typical subtype [IPRO03591] (1); Leucine-rich repeat domain, L domain-like [IPRO2675] (1); Leucine-rich repeat [IPRO1611] (1)                                                                                                                                |                                    | C_ush1i_01646_mRNA_12.1    | -                           |
| GF0041467 | 0                               | 1                       | 1                        | 0 Hypothetical protein (1)                                                              | hydrolase activity [GO:0016787 molecular_function] (1)                                                                                                                                                                         | Proteinase/serine-proteinase/NOTUM [IPRO04963] (1)                                                                                                                                                                                                                                |                                    | C_ush1i_01646_mRNA_11.1    | -                           |
| GF0041466 | 0                               | 1                       | 1                        | 0 Hypothetical protein (1)                                                              |                                                                                                                                                                                                                                |                                                                                                                                                                                                                                                                                   |                                    | C_ush1i_01645_mRNA_3.1     | -                           |
| GF0041465 | 0                               | 1                       | 1                        | 0 Hypothetical protein (1)                                                              |                                                                                                                                                                                                                                |                                                                                                                                                                                                                                                                                   |                                    | C_ush1i_01645_mRNA_2.1     | -                           |
| GF0041464 | 0                               | 1                       | 1                        | 0 Hypothetical protein (1)                                                              |                                                                                                                                                                                                                                |                                                                                                                                                                                                                                                                                   |                                    | C_ush1i_01645_mRNA_1.1     | -                           |
| GF0041463 | 0                               | 1                       | 1                        | 0 Hypothetical protein (1)                                                              |                                                                                                                                                                                                                                |                                                                                                                                                                                                                                                                                   |                                    | C_ush1i_01644_mRNA_3.1     | -                           |
| GF0041462 | 0                               | 1                       | 1                        | 0 Putative polyprotein (Aspartic proteinase, reverse transcriptase, ribonuclease H) (1) |                                                                                                                                                                                                                                | Reverse transcriptase domain [IPRO00477] (4)                                                                                                                                                                                                                                      |                                    | C_ush1i_01643_mRNA_2.1     | -                           |
| GF0041461 | 0                               | 1                       | 1                        | 0 Hypothetical protein (1)                                                              |                                                                                                                                                                                                                                |                                                                                                                                                                                                                                                                                   |                                    | C_ush1i_01641_mRNA_9.1     | -                           |
| GF0041460 | 0                               | 1                       | 1                        | 0 LRR receptor-like kinase family protein (1)                                           | protein binding [GO:0005515 molecular_function] (1)                                                                                                                                                                            | Leucine-rich repeat domain, L domain-like [IPRO2675] (1); Leucine-rich repeat [IPRO1611] (1); Leucine-rich repeat-containing N-terminal, plant-type [IPRO13210] (1)                                                                                                               |                                    | C_ush1i_01640_mRNA_1.1     | -                           |
| GF0041459 | 0                               | 1                       | 1                        | 0 Hypothetical protein (1)                                                              |                                                                                                                                                                                                                                | Pentapeptide repeat [IPRO02885] (1)                                                                                                                                                                                                                                               |                                    | C_ush1i_01639_mRNA_3.1     | -                           |
| GF0041458 | 0                               | 1                       | 1                        | 0 Hypothetical protein (1)                                                              |                                                                                                                                                                                                                                |                                                                                                                                                                                                                                                                                   |                                    | C_ush1i_01638_mRNA_9.1     | -                           |
| GF0041457 | 0                               | 1                       | 1                        | 0 Hypothetical protein (1)                                                              |                                                                                                                                                                                                                                |                                                                                                                                                                                                                                                                                   |                                    | C_ush1i_01638_mRNA_8.1     | -                           |
| GF0041456 | 0                               | 1                       | 1                        | 0 Hypothetical protein (1)                                                              |                                                                                                                                                                                                                                |                                                                                                                                                                                                                                                                                   |                                    | C_ush1i_01638_mRNA_7.1     | -                           |
| GF0041455 | 0                               | 1                       | 1                        | 0 Ubiquitinyl hydrolase 1 (1)                                                           | thiol-dependent ubiquitin-specific protease activity [GO:0004843 molecular_function] (1); intracellular [GO:0005622 cellular_component] (1); ubiquitin-dependent protein catabolic process [GO:0006511 biological_process] (1) | Peptidase C12, ubiquitin carboxyl-terminal hydrolase [IPRO01578] (1)                                                                                                                                                                                                              |                                    | C_ush1i_01638_mRNA_6.1     | -                           |
| GF0041454 | 0                               | 1                       | 1                        | 0 Hypothetical protein (1)                                                              |                                                                                                                                                                                                                                |                                                                                                                                                                                                                                                                                   |                                    | C_ush1i_01638_mRNA_2.1     | -                           |
| GF0041453 | 0                               | 1                       | 1                        | 0 Hypothetical protein (1)                                                              |                                                                                                                                                                                                                                |                                                                                                                                                                                                                                                                                   |                                    | C_ush1i_01638_mRNA_11.1    | -                           |
| GF0041452 | 0                               | 1                       | 1                        | 0 Hypothetical protein (1)                                                              |                                                                                                                                                                                                                                |                                                                                                                                                                                                                                                                                   |                                    | C_ush1i_01638_mRNA_10.1    | -                           |
| GF0041451 | 0                               | 1                       | 1                        | 0 Hypothetical protein (1)                                                              |                                                                                                                                                                                                                                |                                                                                                                                                                                                                                                                                   |                                    | C_ush1i_01637_mRNA_9.1     | -                           |
| GF0041450 | 0                               | 1                       | 1                        | 0 Hypothetical protein (1)                                                              |                                                                                                                                                                                                                                |                                                                                                                                                                                                                                                                                   |                                    | C_ush1i_01637_mRNA_8.1     | -                           |
| GF0041449 | 0                               | 1                       | 1                        | 0 Hypothetical protein (1)                                                              | proteolysis [GO:0006508 biological_process] (1); aspartic-type endopeptidase activity [GO:0004190 molecular_function] (1)                                                                                                      | Aspartic peptidase domain [IPRO21109] (1); Reverse transcriptase domain [IPRO0477] (1); Retropressin [IPRO1806] (1); Peptidase A2A, retroviral, catalytic [IPRO01995] (1)                                                                                                         |                                    | C_ush1i_01637_mRNA_5.1     | -                           |
| GF0041448 | 0                               | 1                       | 1                        | 0 Cytokinin riboside 5'-monophosphate phosphohydrolase (1)                              |                                                                                                                                                                                                                                |                                                                                                                                                                                                                                                                                   |                                    | C_ush1i_01637_mRNA_3.1     | -                           |
| GF0041447 | 0                               | 1                       | 1                        | 0 Hypothetical protein (1)                                                              |                                                                                                                                                                                                                                |                                                                                                                                                                                                                                                                                   |                                    | C_ush1i_01637_mRNA_10.1    | -                           |
| GF0041446 | 0                               | 1                       | 1                        | 0 Hypothetical protein (1)                                                              |                                                                                                                                                                                                                                |                                                                                                                                                                                                                                                                                   |                                    | C_ush1i_01637_mRNA_1.1     | -                           |
| GF0041445 | 0                               | 1                       | 1                        | 0 Polyphosphoinositide phosphatase (1)                                                  | phosphatidylinositol-3-phosphate biosynthetic process [GO:0036092 biological_process] (1); phosphate ester hydrolase activity [GO:0004278 molecular_function] (1); vacuole organization [GO:0007033 biological_process] (1)    | SAC domain [IPRO01013] (1); Phosphoinositide phosphatase SAC, plants [IPRO10215] (1)                                                                                                                                                                                              |                                    | C_ush1i_01633_mRNA_3.1     | -                           |
| GF0041444 | 0                               | 1                       | 1                        | 0 Hypothetical protein (1)                                                              |                                                                                                                                                                                                                                | Retromer/pag domain [IPRO05162] (1)                                                                                                                                                                                                                                               |                                    | C_ush1i_01632_mRNA_8.1     | -                           |
| GF0041443 | 0                               | 1                       | 1                        | 0 Hypothetical protein (1)                                                              |                                                                                                                                                                                                                                |                                                                                                                                                                                                                                                                                   |                                    | C_ush1i_01632_mRNA_7.1     | -                           |
| GF0041442 | 0                               | 1                       | 1                        | 0 Hypothetical protein (1)                                                              |                                                                                                                                                                                                                                |                                                                                                                                                                                                                                                                                   |                                    | C_ush1i_01632_mRNA_6.1     | -                           |
| GF0041441 | 0                               | 1                       | 1                        | 0 Hypothetical protein (1)                                                              |                                                                                                                                                                                                                                |                                                                                                                                                                                                                                                                                   |                                    | C_ush1i_01632_mRNA_5.1     | -                           |
| GF0041440 | 0                               | 1                       | 1                        | 0 Hypothetical protein (1)                                                              |                                                                                                                                                                                                                                |                                                                                                                                                                                                                                                                                   |                                    | C_ush1i_01632_mRNA_11.1    | -                           |
| GF0041439 | 0                               | 1                       | 1                        | 0 Hypothetical protein (1)                                                              |                                                                                                                                                                                                                                |                                                                                                                                                                                                                                                                                   |                                    | C_ush1i_01632_mRNA_1.1     | -                           |
| GF0041438 | 0                               | 1                       | 1                        | 0 Hypothetical protein (1)                                                              | copper ion binding [GO:0005507 molecular_function] (1)                                                                                                                                                                         | Cytochrome c oxidase assembly protein CtaG Cox11 domain [IPRO2347] (1); Cytochrome c oxidase assembly protein CtaG Cox11 [IPRO07533] (1)                                                                                                                                          |                                    | C_ush1i_01631_mRNA_7.1     | -                           |
| GF0041437 | 0                               | 1                       | 1                        | 0 Hypothetical protein (1)                                                              |                                                                                                                                                                                                                                |                                                                                                                                                                                                                                                                                   |                                    | C_ush1i_01631_mRNA_4.1     | -                           |
| GF0041436 | 0                               | 1                       | 1                        | 0 Disease resistance protein (1)                                                        |                                                                                                                                                                                                                                | Leucine-rich repeat domain, L domain-like [IPRO2675] (1)                                                                                                                                                                                                                          |                                    | C_ush1i_01630_mRNA_4.1     | -                           |
| GF0041435 | 0                               | 1                       | 1                        | 0 Disease resistance protein RPS5 (1)                                                   | ADP binding [GO:0043531 molecular_function] (1)                                                                                                                                                                                | NB-ARC [IPRO02182] (1); AAA+ ATPase domain [IPRO03593] (1); P-loop containing nucleoside triphosphate hydrolase [IPRO2747] (1)                                                                                                                                                    |                                    | C_ush1i_01630_mRNA_3.1     | -                           |
| GF0041434 | 0                               | 1                       | 1                        | 0 Hypothetical protein (1)                                                              |                                                                                                                                                                                                                                |                                                                                                                                                                                                                                                                                   |                                    | C_ush1i_01629_mRNA_7.1     | -                           |
| GF0041433 | 0                               | 1                       | 1                        | 0 Hypothetical protein (1)                                                              |                                                                                                                                                                                                                                |                                                                                                                                                                                                                                                                                   |                                    | C_ush1i_01629_mRNA_4.1     | -                           |
| GF0041432 | 0                               | 1                       | 1                        | 0 Hypothetical protein (1)                                                              |                                                                                                                                                                                                                                |                                                                                                                                                                                                                                                                                   |                                    | C_ush1i_01629_mRNA_14.1    | -                           |
| GF0041431 | 0                               | 1                       | 1                        | 0 Hypothetical protein (1)                                                              |                                                                                                                                                                                                                                |                                                                                                                                                                                                                                                                                   |                                    | C_ush1i_01629_mRNA_13.1    | -                           |
| GF0041430 | 0                               | 1                       | 1                        | 0 Hypothetical protein (1)                                                              |                                                                                                                                                                                                                                |                                                                                                                                                                                                                                                                                   |                                    | C_ush1i_01628_mRNA_3.1     | -                           |
| GF0041429 | 0                               | 1                       | 1                        | 0 Putative aspartic proteinase (1)                                                      | proteolysis [GO:0006508 biological_process] (1); aspartic-type endopeptidase activity [GO:0004190 molecular_function] (1)                                                                                                      | Aspartic peptidase domain [IPRO21109] (1); Peptidase family A1 domain [IPRO3121] (1); Aspartic peptidase A1 family [IPRO0401] (1); Xylanase inhibitor, C-terminal [IPRO32799] (1); Xylanase inhibitor, N-terminal [IPRO3261] (1); Aspartic peptidase, active site [IPRO01969] (1) |                                    | C_ush1i_01626_mRNA_6.1     | -                           |

| ID        | Num. in <i>C. crottensteini</i> | Num. in <i>C. caudata</i> | Num. in <i>P. putida</i> | Note                                                                 | GO                                                                                                                                                                                                                                                                                                                                                                                                            | InterPro                                                                                                                                                                                                                                                                                                                                                                                                                                                                                                                                                                                                                                                | Members in <i>Crottensteini</i> | Members in <i>Caudata</i> | Members in <i>Putidata</i> |
|-----------|---------------------------------|---------------------------|--------------------------|----------------------------------------------------------------------|---------------------------------------------------------------------------------------------------------------------------------------------------------------------------------------------------------------------------------------------------------------------------------------------------------------------------------------------------------------------------------------------------------------|---------------------------------------------------------------------------------------------------------------------------------------------------------------------------------------------------------------------------------------------------------------------------------------------------------------------------------------------------------------------------------------------------------------------------------------------------------------------------------------------------------------------------------------------------------------------------------------------------------------------------------------------------------|---------------------------------|---------------------------|----------------------------|
| GF0041428 | 0                               | 1                         | 1                        | 0 LRR receptor-like kinase family protein (1)                        | protein binding [GO:0005515 molecular_function] (1); protein phosphorylation [GO:0006468 biological_process] (1); protein kinase activity [GO:0004672 molecular_function] (1); ATP binding [GO:0005524 molecular_function] (1)                                                                                                                                                                                | Leucine-rich repeat domain, I domain-like [IPR012075] (1); Protein kinase-like domain [IPR011009] (1); Leucine-rich repeat, typical subtype [IPR003591] (1); Concavosin A-like lectin/lysozyme domain [IPR013320] (1); Protein kinase domain [IPR000719] (1); Serine/threonine-tyrosine-protein kinase catalytic domain [IPR001245] (1); Leucine-rich repeat [IPR016111] (1); Serine/threonine-protein kinase, active site [IPR008271] (1); Protein kinase, ATP binding site [IPR017411] (1); Leucine-rich repeat-containing N-terminal, plant-type [IPR013210] (1); Serine/threonine dual specificity protein kinase, catalytic domain [IPR002290] (1) | C_uni_hu_01625_mRNA_3.1         | -                         | -                          |
| GF0041427 | 0                               | 1                         | 1                        | 0 Hypothetical protein (1)                                           | -                                                                                                                                                                                                                                                                                                                                                                                                             | -                                                                                                                                                                                                                                                                                                                                                                                                                                                                                                                                                                                                                                                       | -                               | C_uni_hu_01624_mRNA_4.1   | -                          |
| GF0041426 | 0                               | 1                         | 1                        | 0 Hypothetical protein (1)                                           | -                                                                                                                                                                                                                                                                                                                                                                                                             | -                                                                                                                                                                                                                                                                                                                                                                                                                                                                                                                                                                                                                                                       | -                               | C_uni_hu_01623_mRNA_3.1   | -                          |
| GF0041425 | 0                               | 1                         | 1                        | 0 Hypothetical protein (1)                                           | -                                                                                                                                                                                                                                                                                                                                                                                                             | -                                                                                                                                                                                                                                                                                                                                                                                                                                                                                                                                                                                                                                                       | -                               | C_uni_hu_01622_mRNA_4.1   | -                          |
| GF0041424 | 0                               | 1                         | 1                        | 0 Hypothetical protein (1)                                           | -                                                                                                                                                                                                                                                                                                                                                                                                             | -                                                                                                                                                                                                                                                                                                                                                                                                                                                                                                                                                                                                                                                       | -                               | C_uni_hu_01621_mRNA_3.1   | -                          |
| GF0041423 | 0                               | 1                         | 1                        | 0 Hypothetical protein (1)                                           | -                                                                                                                                                                                                                                                                                                                                                                                                             | -                                                                                                                                                                                                                                                                                                                                                                                                                                                                                                                                                                                                                                                       | -                               | C_uni_hu_01621_mRNA_2.1   | -                          |
| GF0041422 | 0                               | 1                         | 1                        | 0 LRR receptor-like serine/threonine-protein kinase EFR (1)          | protein phosphorylation [GO:0006468 biological_process] (1); protein kinase activity [GO:0004672 molecular_function] (1); protein binding [GO:0005515 molecular_function] (1)                                                                                                                                                                                                                                 | Protein kinase-like domain [IPR011009] (1); Leucine-rich repeat domain, I domain-like [IPR012075] (1); Leucine-rich repeat, typical subtype [IPR003591] (1); Serine/threonine-tyrosine-protein kinase catalytic domain [IPR001245] (1); Leucine-rich repeat [IPR016111] (1); Leucine-rich repeat-containing N-terminal, plant-type [IPR013210] (1)                                                                                                                                                                                                                                                                                                      | C_uni_hu_01621_mRNA_1.1         | -                         | -                          |
| GF0041421 | 0                               | 1                         | 1                        | 0 Hypothetical protein (1)                                           | -                                                                                                                                                                                                                                                                                                                                                                                                             | -                                                                                                                                                                                                                                                                                                                                                                                                                                                                                                                                                                                                                                                       | -                               | C_uni_hu_01620_mRNA_9.1   | -                          |
| GF0041420 | 0                               | 1                         | 1                        | 0 Hypothetical protein (1)                                           | -                                                                                                                                                                                                                                                                                                                                                                                                             | -                                                                                                                                                                                                                                                                                                                                                                                                                                                                                                                                                                                                                                                       | -                               | C_uni_hu_01620_mRNA_8.1   | -                          |
| GF0041419 | 0                               | 1                         | 1                        | 0 Uncharacterized mitochondrial protein AAm00810 (1)                 | -                                                                                                                                                                                                                                                                                                                                                                                                             | Reverse transcriptase, RNA-dependent DNA polymerase [IPR013103] (1)                                                                                                                                                                                                                                                                                                                                                                                                                                                                                                                                                                                     | -                               | C_uni_hu_01620_mRNA_6.1   | -                          |
| GF0041418 | 0                               | 1                         | 1                        | 0 Hypothetical protein (1)                                           | -                                                                                                                                                                                                                                                                                                                                                                                                             | -                                                                                                                                                                                                                                                                                                                                                                                                                                                                                                                                                                                                                                                       | -                               | C_uni_hu_01620_mRNA_5.1   | -                          |
| GF0041417 | 0                               | 1                         | 1                        | 0 Hypothetical protein (1)                                           | -                                                                                                                                                                                                                                                                                                                                                                                                             | -                                                                                                                                                                                                                                                                                                                                                                                                                                                                                                                                                                                                                                                       | -                               | C_uni_hu_01620_mRNA_2.1   | -                          |
| GF0041416 | 0                               | 1                         | 1                        | 0 Disease resistance protein RPS2 (1)                                | protein binding [GO:0005515 molecular_function] (1); ADP binding [GO:0048531 molecular_function] (1)                                                                                                                                                                                                                                                                                                          | P-loop containing nucleoside triphosphate hydrolase [IPR027417] (1); NB-ARC [IPR002182] (1); Leucine-rich repeat [IPR016111] (1); Leucine-rich repeat domain, I domain-like [IPR032675] (1)                                                                                                                                                                                                                                                                                                                                                                                                                                                             | C_uni_hu_01620_mRNA_11.1        | -                         | -                          |
| GF0041415 | 0                               | 1                         | 1                        | 0 Hypothetical protein (1)                                           | -                                                                                                                                                                                                                                                                                                                                                                                                             | -                                                                                                                                                                                                                                                                                                                                                                                                                                                                                                                                                                                                                                                       | -                               | C_uni_hu_01620_mRNA_1.1   | -                          |
| GF0041414 | 0                               | 1                         | 1                        | 0 Hypothetical protein (1)                                           | response to oxidative stress [GO:0006979 biological_process] (1); heme binding [GO:0020837 molecular_function] (1); heme binding [GO:0020837 molecular_function] (1); oxidation-reduction process [GO:0055115 biological_process] (1); peroxidase activity [GO:0004601 molecular_function] (1)                                                                                                                | Peroxidase heme ligand binding site [IPR019793] (1); Peroxidase, active site [IPR019794] (1); Heme peroxidase, plant/fungal/bacterial [IPR020161] (1); Heme peroxidase [IPR010255] (1); Protein kinase-like domain [IPR011009] (1); Plant ascorbate peroxidase [IPR002207] (1)                                                                                                                                                                                                                                                                                                                                                                          | C_uni_hu_01619_mRNA_6.1         | -                         | -                          |
| GF0041413 | 0                               | 1                         | 1                        | 0 Nitrate excretion transporter 1 (1)                                | oligopeptide transporter [GO:0006857 biological_process] (1); transporter activity [GO:0005215 molecular_function] (1); transport [GO:0006810 biological_process] (1); membrane [GO:0016020 cellular_component] (1)                                                                                                                                                                                           | PT22 family protooligopeptide symporter, conserved site [IPR018456] (1); Protein-dependent oligopeptide transporter family [IPR000109] (1); Major facilitator superfamily domain [IPR020846] (1)                                                                                                                                                                                                                                                                                                                                                                                                                                                        | C_uni_hu_01619_mRNA_4.1         | -                         | -                          |
| GF0041412 | 0                               | 1                         | 1                        | 0 Hypothetical protein (1)                                           | -                                                                                                                                                                                                                                                                                                                                                                                                             | -                                                                                                                                                                                                                                                                                                                                                                                                                                                                                                                                                                                                                                                       | -                               | C_uni_hu_01618_mRNA_2.1   | -                          |
| GF0041411 | 0                               | 1                         | 1                        | 0 Ankyrin repeat plant-like protein (1)                              | protein binding [GO:0005515 molecular_function] (1)                                                                                                                                                                                                                                                                                                                                                           | Ankyrin repeat [IPR002110] (1); Ankyrin repeat-containing domain [IPR020853] (1); POG domain [IPR020661] (1)                                                                                                                                                                                                                                                                                                                                                                                                                                                                                                                                            | C_uni_hu_01617_mRNA_2.1         | -                         | -                          |
| GF0041410 | 0                               | 1                         | 1                        | 0 Hypothetical protein (1)                                           | nucleic acid binding [GO:0003676 molecular_function] (1); DNA integration [GO:0015074 biological_process] (1)                                                                                                                                                                                                                                                                                                 | PGC domain [IPR020861] (1); GAG-pre-integrase domain [IPR025224] (1); Ribonuclease H-like domain [IPR012337] (1); Integrase, catalytic core [IPR015841] (1)                                                                                                                                                                                                                                                                                                                                                                                                                                                                                             | C_uni_hu_01617_mRNA_1.1         | -                         | -                          |
| GF0041409 | 0                               | 1                         | 1                        | 0 Hypothetical protein (1)                                           | -                                                                                                                                                                                                                                                                                                                                                                                                             | -                                                                                                                                                                                                                                                                                                                                                                                                                                                                                                                                                                                                                                                       | -                               | C_uni_hu_01616_mRNA_4.1   | -                          |
| GF0041408 | 0                               | 1                         | 1                        | 0 Hypothetical protein (1)                                           | -                                                                                                                                                                                                                                                                                                                                                                                                             | -                                                                                                                                                                                                                                                                                                                                                                                                                                                                                                                                                                                                                                                       | -                               | C_uni_hu_01616_mRNA_1.1   | -                          |
| GF0041407 | 0                               | 1                         | 1                        | 0 Hypothetical protein (1)                                           | nucleic acid binding [GO:0003676 molecular_function] (1); zinc ion binding [GO:0005270 molecular_function] (1)                                                                                                                                                                                                                                                                                                | Zinc finger, CCHC-type [IPR001878] (1)                                                                                                                                                                                                                                                                                                                                                                                                                                                                                                                                                                                                                  | C_uni_hu_01615_mRNA_9.1         | -                         | -                          |
| GF0041406 | 0                               | 1                         | 1                        | 0 Hypothetical protein (1)                                           | -                                                                                                                                                                                                                                                                                                                                                                                                             | -                                                                                                                                                                                                                                                                                                                                                                                                                                                                                                                                                                                                                                                       | -                               | C_uni_hu_01615_mRNA_8.1   | -                          |
| GF0041405 | 0                               | 1                         | 1                        | 0 Hypothetical protein (1)                                           | -                                                                                                                                                                                                                                                                                                                                                                                                             | -                                                                                                                                                                                                                                                                                                                                                                                                                                                                                                                                                                                                                                                       | -                               | C_uni_hu_01615_mRNA_7.1   | -                          |
| GF0041404 | 0                               | 1                         | 1                        | 0 Hypothetical protein (1)                                           | -                                                                                                                                                                                                                                                                                                                                                                                                             | -                                                                                                                                                                                                                                                                                                                                                                                                                                                                                                                                                                                                                                                       | -                               | C_uni_hu_01615_mRNA_6.1   | -                          |
| GF0041403 | 0                               | 1                         | 1                        | 0 Hypothetical protein (1)                                           | -                                                                                                                                                                                                                                                                                                                                                                                                             | -                                                                                                                                                                                                                                                                                                                                                                                                                                                                                                                                                                                                                                                       | -                               | C_uni_hu_01615_mRNA_5.1   | -                          |
| GF0041402 | 0                               | 1                         | 1                        | 0 Hypothetical protein (1)                                           | -                                                                                                                                                                                                                                                                                                                                                                                                             | -                                                                                                                                                                                                                                                                                                                                                                                                                                                                                                                                                                                                                                                       | -                               | C_uni_hu_01615_mRNA_3.1   | -                          |
| GF0041401 | 0                               | 1                         | 1                        | 0 Hypothetical protein (1)                                           | -                                                                                                                                                                                                                                                                                                                                                                                                             | -                                                                                                                                                                                                                                                                                                                                                                                                                                                                                                                                                                                                                                                       | -                               | C_uni_hu_01615_mRNA_2.1   | -                          |
| GF0041400 | 0                               | 1                         | 1                        | 0 Hypothetical protein (1)                                           | -                                                                                                                                                                                                                                                                                                                                                                                                             | -                                                                                                                                                                                                                                                                                                                                                                                                                                                                                                                                                                                                                                                       | -                               | C_uni_hu_01615_mRNA_1.1   | -                          |
| GF0041399 | 0                               | 1                         | 1                        | 0 Hypothetical protein (1)                                           | nucleic acid binding [GO:0003676 molecular_function] (1); zinc ion binding [GO:0005270 molecular_function] (1)                                                                                                                                                                                                                                                                                                | Zinc finger, CCHC-type [IPR001878] (1)                                                                                                                                                                                                                                                                                                                                                                                                                                                                                                                                                                                                                  | C_uni_hu_01614_mRNA_5.1         | -                         | -                          |
| GF0041398 | 0                               | 1                         | 1                        | 0 Cytokinin riboside 5'-monophosphate phosphorohydrolase (1)         | -                                                                                                                                                                                                                                                                                                                                                                                                             | LOG family [IPR031100] (1); Cytokinin riboside 5'-monophosphate phosphorohydrolase LOG [IPR005269] (1)                                                                                                                                                                                                                                                                                                                                                                                                                                                                                                                                                  | C_uni_hu_01614_mRNA_1.1         | -                         | -                          |
| GF0041397 | 0                               | 1                         | 1                        | 0 Hypothetical protein (1)                                           | -                                                                                                                                                                                                                                                                                                                                                                                                             | -                                                                                                                                                                                                                                                                                                                                                                                                                                                                                                                                                                                                                                                       | -                               | C_uni_hu_01612_mRNA_6.1   | -                          |
| GF0041396 | 0                               | 1                         | 1                        | 0 Hypothetical protein (1)                                           | -                                                                                                                                                                                                                                                                                                                                                                                                             | -                                                                                                                                                                                                                                                                                                                                                                                                                                                                                                                                                                                                                                                       | -                               | C_uni_hu_01612_mRNA_4.1   | -                          |
| GF0041395 | 0                               | 1                         | 1                        | 0 SLG-Ss and SLA-Ss genes and Mdm20 retrotransposon sequence (1)     | proteolysis [GO:0006508 biological_process] (1); cysteine-type peptidase activity [GO:0008234 molecular_function] (1)                                                                                                                                                                                                                                                                                         | Ulp1 protease family, C-terminal catalytic domain [IPR006453] (1)                                                                                                                                                                                                                                                                                                                                                                                                                                                                                                                                                                                       | C_uni_hu_01611_mRNA_5.1         | -                         | -                          |
| GF0041394 | 0                               | 1                         | 1                        | 0 Hypothetical protein (1)                                           | -                                                                                                                                                                                                                                                                                                                                                                                                             | -                                                                                                                                                                                                                                                                                                                                                                                                                                                                                                                                                                                                                                                       | -                               | C_uni_hu_01611_mRNA_4.1   | -                          |
| GF0041393 | 0                               | 1                         | 1                        | 0 Hypothetical protein (1)                                           | -                                                                                                                                                                                                                                                                                                                                                                                                             | -                                                                                                                                                                                                                                                                                                                                                                                                                                                                                                                                                                                                                                                       | -                               | C_uni_hu_01611_mRNA_3.1   | -                          |
| GF0041392 | 0                               | 1                         | 1                        | 0 Hypothetical protein (1)                                           | -                                                                                                                                                                                                                                                                                                                                                                                                             | -                                                                                                                                                                                                                                                                                                                                                                                                                                                                                                                                                                                                                                                       | -                               | C_uni_hu_01611_mRNA_1.1   | -                          |
| GF0041391 | 0                               | 1                         | 1                        | 0 Hypothetical protein (1)                                           | -                                                                                                                                                                                                                                                                                                                                                                                                             | -                                                                                                                                                                                                                                                                                                                                                                                                                                                                                                                                                                                                                                                       | -                               | C_uni_hu_01610_mRNA_6.1   | -                          |
| GF0041390 | 0                               | 1                         | 1                        | 0 Hypothetical protein (1)                                           | histone acetyltransferase complex [GO:0000123 cellular_component] (1)                                                                                                                                                                                                                                                                                                                                         | KAT5 regulatory NSL complex subunit 2 [IPR026310] (1); Potential DNA-binding domain [IPR029271] (1)                                                                                                                                                                                                                                                                                                                                                                                                                                                                                                                                                     | C_uni_hu_01609_mRNA_3.1         | -                         | -                          |
| GF0041389 | 0                               | 1                         | 1                        | 0 Hypothetical protein (1)                                           | -                                                                                                                                                                                                                                                                                                                                                                                                             | -                                                                                                                                                                                                                                                                                                                                                                                                                                                                                                                                                                                                                                                       | -                               | C_uni_hu_01609_mRNA_1.1   | -                          |
| GF0041388 | 0                               | 1                         | 1                        | 0 Prefoldin chaperone subunit family protein, putative isoform 2 (1) | prefoldin complex [GO:0016272 cellular_component] (1); unfolded protein binding [GO:0051082 molecular_function] (1); protein folding [GO:0006457 biological_process] (1); lyase activity [GO:0016829 molecular_function] (1); terpene synthase activity [GO:0010333 molecular_function] (1); magnesium ion binding [GO:0000287 molecular_function] (1); metabolic process [GO:0008152 biological_process] (1) | Prefoldin alpha-like [IPR04127] (1); Prefoldin alpha subunit, archaean-type [IPR015999] (1); Prefoldin [IPR009053] (1); Isoprenoid synthase domain [IPR008949] (1); Terpene cyclase/protein prenyltransferase alpha alpha toxioid [IPR008930] (1); Terpene synthase, N-terminal domain [IPR001906] (1); Terpene synthase, metal-binding domain [IPR006301] (1)                                                                                                                                                                                                                                                                                          | C_uni_hu_01608_mRNA_4.1         | -                         | -                          |
| GF0041387 | 0                               | 1                         | 1                        | 0 Hypothetical protein (1)                                           | -                                                                                                                                                                                                                                                                                                                                                                                                             | -                                                                                                                                                                                                                                                                                                                                                                                                                                                                                                                                                                                                                                                       | -                               | C_uni_hu_01608_mRNA_3.1   | -                          |
| GF0041386 | 0                               | 1                         | 1                        | 0 Hypothetical protein (1)                                           | protein dimerization activity [GO:0046983 molecular_function] (1)                                                                                                                                                                                                                                                                                                                                             | Winged helix-turn-helix DNA-binding domain [IPR015991] (1); Plant multidomain protein dimerization [IPR012967] (1)                                                                                                                                                                                                                                                                                                                                                                                                                                                                                                                                      | C_uni_hu_01607_mRNA_6.1         | -                         | -                          |
| GF0041385 | 0                               | 1                         | 1                        | 0 Hypothetical protein (1)                                           | -                                                                                                                                                                                                                                                                                                                                                                                                             | -                                                                                                                                                                                                                                                                                                                                                                                                                                                                                                                                                                                                                                                       | -                               | C_uni_hu_01606_mRNA_4.1   | -                          |
| GF0041384 | 0                               | 1                         | 1                        | 0 Hypothetical protein (1)                                           | cysteine-type peptidase activity [GO:0008234 molecular_function] (1); proteolysis [GO:0006508 biological_process] (1)                                                                                                                                                                                                                                                                                         | Ulp1 protease family, C-terminal catalytic domain [IPR006453] (1)                                                                                                                                                                                                                                                                                                                                                                                                                                                                                                                                                                                       | C_uni_hu_01606_mRNA_3.1         | -                         | -                          |
| GF0041383 | 0                               | 1                         | 1                        | 0 Carotenoid cleavage dioxygenase (1)                                | oxidoreductase activity, acting on single donors with incorporation of molecular oxygen, incorporation of two atoms of oxygen [GO:0016702 molecular_function] (1); oxidation-reduction process [GO:0005114 biological_process] (1)                                                                                                                                                                            | Carotenoid oxygenase [IPR004294] (1)                                                                                                                                                                                                                                                                                                                                                                                                                                                                                                                                                                                                                    | C_uni_hu_01606_mRNA_2.1         | -                         | -                          |
| GF0041382 | 0                               | 1                         | 1                        | 0 Disease resistance protein (1)                                     | ADP binding [GO:0048331 molecular_function] (1); protein binding [GO:0005515 molecular_function] (1)                                                                                                                                                                                                                                                                                                          | NB-ARC [IPR002182] (1); Leucine-rich repeat [IPR016111] (1); AAA-ATPase domain [IPR003591] (1); P-loop containing nucleoside triphosphate hydrolase [IPR027417] (1); Leucine-rich repeat domain, I domain-like [IPR032675] (1)                                                                                                                                                                                                                                                                                                                                                                                                                          | C_uni_hu_01605_mRNA_8.1         | -                         | -                          |
| GF0041381 | 0                               | 1                         | 1                        | 0 Beta-1,3-N-acetylglucosaminyltransferase hemic Binge (1)           | -                                                                                                                                                                                                                                                                                                                                                                                                             | Protein of unknown function DJF604 [IPR007403] (1)                                                                                                                                                                                                                                                                                                                                                                                                                                                                                                                                                                                                      | C_uni_hu_01604_mRNA_7.1         | -                         | -                          |
| GF0041380 | 0                               | 1                         | 1                        | 0 Hypothetical protein (1)                                           | ATP binding [GO:0005524 molecular_function] (1); protein phosphorylation [GO:0006468 biological_process] (1); protein kinase activity [GO:0004672 molecular_function] (1)                                                                                                                                                                                                                                     | Serine/threonine-protein kinase, active site [IPR008271] (1); Serine/threonine dual specificity protein kinase, catalytic domain [IPR007901] (1); Protein kinase-like domain [IPR011009] (1); Protein kinase domain [IPR000719] (1)                                                                                                                                                                                                                                                                                                                                                                                                                     | C_uni_hu_01604_mRNA_3.1         | -                         | -                          |
| GF0041379 | 0                               | 1                         | 1                        | 0 Leucine-rich repeat protein kinase family protein, putative (1)    | protein phosphorylation [GO:0006468 biological_process] (1); protein kinase activity [GO:0004672 molecular_function] (1); ATP binding [GO:0005524 molecular_function] (1)                                                                                                                                                                                                                                     | Protein kinase domain [IPR000719] (1); Protein kinase-like domain [IPR011009] (1); Serine/threonine-tyrosine-protein kinase catalytic domain [IPR001245] (1)                                                                                                                                                                                                                                                                                                                                                                                                                                                                                            | C_uni_hu_01603_mRNA_7.1         | -                         | -                          |
| GF0041378 | 0                               | 1                         | 1                        | 0 Hypothetical protein (1)                                           | ATP binding [GO:0005524 molecular_function] (1); protein kinase activity [GO:0004672 molecular_function] (1); protein phosphorylation [GO:0006468 biological_process] (1)                                                                                                                                                                                                                                     | Serine/threonine-tyrosine-protein kinase catalytic domain [IPR001245] (1); Serine/threonine-protein kinase, active site [IPR008271] (1); Serine/threonine dual specificity protein kinase, catalytic domain [IPR007901] (1); Protein kinase-like domain [IPR011009] (1); Protein kinase domain [IPR000719] (1)                                                                                                                                                                                                                                                                                                                                          | C_uni_hu_01603_mRNA_5.1         | -                         | -                          |
| GF0041377 | 0                               | 1                         | 1                        | 0 Hypothetical protein (1)                                           | -                                                                                                                                                                                                                                                                                                                                                                                                             | -                                                                                                                                                                                                                                                                                                                                                                                                                                                                                                                                                                                                                                                       | -                               | C_uni_hu_01602_mRNA_5.1   | -                          |

| ID        | Num. in C. crottenstei | Num. in C. auris | Num. in P. putida | Name                                                              | GO                                                                                                                                                                                                                                                                                                                                   | InterPro                                                                                                                                                                                                                                     | Members in C. crottenstei | Members in C. auris     | Members in P. putida |
|-----------|------------------------|------------------|-------------------|-------------------------------------------------------------------|--------------------------------------------------------------------------------------------------------------------------------------------------------------------------------------------------------------------------------------------------------------------------------------------------------------------------------------|----------------------------------------------------------------------------------------------------------------------------------------------------------------------------------------------------------------------------------------------|---------------------------|-------------------------|----------------------|
| GF0041376 | 0                      | 1                | 0                 | Cytochrome P450 (1)                                               | iron ion binding [GO:0005506 molecular_function] (1); heme binding [GO:002037 molecular_function] (1); oxidation-reduction process [GO:0005514 biological_process] (1); cytochrome P450, E-class, group I activity, acting on paired donors, with incorporation or reduction of molecular oxygen [GO:0016705 molecular_function] (1) | Cytochrome P450 [IPR011220] (1); Cytochrome P450, E-class, group I [IPR024011] (1)                                                                                                                                                           |                           | C_ushii_01602_mRNA_2,1  | -                    |
| GF0041375 | 0                      | 1                | 0                 | Hypothetical protein (1)                                          |                                                                                                                                                                                                                                                                                                                                      |                                                                                                                                                                                                                                              |                           | C_ushii_01601_mRNA_4,1  | -                    |
| GF0041374 | 0                      | 1                | 0                 | Hypothetical protein (1)                                          |                                                                                                                                                                                                                                                                                                                                      |                                                                                                                                                                                                                                              |                           | C_ushii_01601_mRNA_3,1  | -                    |
| GF0041373 | 0                      | 1                | 0                 | Hypothetical protein (1)                                          |                                                                                                                                                                                                                                                                                                                                      |                                                                                                                                                                                                                                              |                           | C_ushii_01601_mRNA_1,1  | -                    |
| GF0041372 | 0                      | 1                | 0                 | Hypothetical protein (1)                                          |                                                                                                                                                                                                                                                                                                                                      |                                                                                                                                                                                                                                              |                           | C_ushii_01599_mRNA_6,1  | -                    |
| GF0041371 | 0                      | 1                | 0                 | Hypothetical protein (1)                                          |                                                                                                                                                                                                                                                                                                                                      |                                                                                                                                                                                                                                              |                           | C_ushii_01599_mRNA_2,1  | -                    |
| GF0041370 | 0                      | 1                | 0                 | Hypothetical protein (1)                                          |                                                                                                                                                                                                                                                                                                                                      |                                                                                                                                                                                                                                              |                           | C_ushii_01599_mRNA_1,1  | -                    |
| GF0041369 | 0                      | 1                | 0                 | Hypothetical protein (1)                                          |                                                                                                                                                                                                                                                                                                                                      |                                                                                                                                                                                                                                              |                           | C_ushii_01598_mRNA_9,1  | -                    |
| GF0041368 | 0                      | 1                | 0                 | Hypothetical protein (1)                                          |                                                                                                                                                                                                                                                                                                                                      |                                                                                                                                                                                                                                              |                           | C_ushii_01598_mRNA_8,1  | -                    |
| GF0041367 | 0                      | 1                | 0                 | CXE carboxylesterase (1)                                          | metabolic process [GO:0008152 biological_process] (1); hydrolase activity [GO:0016787 molecular_function] (1)                                                                                                                                                                                                                        | Alpha/beta hydrolase fold-3 [IPR013094] (1); Alpha/Beta hydrolase fold [IPR029058] (1)                                                                                                                                                       |                           | C_ushii_01598_mRNA_5,1  | -                    |
| GF0041366 | 0                      | 1                | 0                 | Hypothetical protein (1)                                          |                                                                                                                                                                                                                                                                                                                                      |                                                                                                                                                                                                                                              |                           | C_ushii_01598_mRNA_4,1  | -                    |
| GF0041365 | 0                      | 1                | 0                 | Hypothetical protein (1)                                          |                                                                                                                                                                                                                                                                                                                                      |                                                                                                                                                                                                                                              |                           | C_ushii_01597_mRNA_9,1  | -                    |
| GF0041364 | 0                      | 1                | 0                 | Hypothetical protein (1)                                          |                                                                                                                                                                                                                                                                                                                                      |                                                                                                                                                                                                                                              |                           | C_ushii_01597_mRNA_6,1  | -                    |
| GF0041363 | 0                      | 1                | 0                 | Hypothetical protein (1)                                          |                                                                                                                                                                                                                                                                                                                                      |                                                                                                                                                                                                                                              |                           | C_ushii_01597_mRNA_5,1  | -                    |
| GF0041362 | 0                      | 1                | 0                 | Hypothetical protein (1)                                          |                                                                                                                                                                                                                                                                                                                                      |                                                                                                                                                                                                                                              |                           | C_ushii_01597_mRNA_2,1  | -                    |
| GF0041361 | 0                      | 1                | 0                 | Hypothetical protein (1)                                          |                                                                                                                                                                                                                                                                                                                                      | FANCI solenoid 2 domain [IPR029315] (1)                                                                                                                                                                                                      |                           | C_ushii_01597_mRNA_10,1 | -                    |
| GF0041360 | 0                      | 1                | 0                 | Hypothetical protein (1)                                          |                                                                                                                                                                                                                                                                                                                                      |                                                                                                                                                                                                                                              |                           | C_ushii_01597_mRNA_1,1  | -                    |
| GF0041359 | 0                      | 1                | 0                 | Hypothetical protein (1)                                          |                                                                                                                                                                                                                                                                                                                                      |                                                                                                                                                                                                                                              |                           | C_ushii_01596_mRNA_5,1  | -                    |
| GF0041358 | 0                      | 1                | 0                 | Disease resistance protein RPS2 (1)                               | protein binding [GO:0005515 molecular_function] (1); ADP binding [GO:0043531 molecular_function] (1)                                                                                                                                                                                                                                 | NB-ARC [IPR02182] (1); Leucine-rich repeat [IPR01611] (1); P-loop containing nucleoside triphosphate hydrolase [IPR027471] (1); Leucine-rich repeat domain, L domain-like [IPR032675] (1)                                                    |                           | C_ushii_01595_mRNA_4,1  | -                    |
| GF0041357 | 0                      | 1                | 0                 | Hypothetical protein (1)                                          |                                                                                                                                                                                                                                                                                                                                      |                                                                                                                                                                                                                                              |                           | C_ushii_01595_mRNA_3,1  | -                    |
| GF0041356 | 0                      | 1                | 0                 | Hypothetical protein (1)                                          |                                                                                                                                                                                                                                                                                                                                      |                                                                                                                                                                                                                                              |                           | C_ushii_01595_mRNA_2,1  | -                    |
| GF0041355 | 0                      | 1                | 0                 | Flavonoid 3-monooxygenase (1)                                     | iron ion binding [GO:0005506 molecular_function] (1); heme binding [GO:002037 molecular_function] (1); oxidoreductase activity, acting on paired donors, with incorporation or reduction of molecular oxygen [GO:0016705 molecular_function] (1); oxidation-reduction process [GO:0005514 biological_process] (1)                    | Cytochrome P450 [IPR011220] (1)                                                                                                                                                                                                              |                           | C_ushii_01595_mRNA_1,1  | -                    |
| GF0041354 | 0                      | 1                | 0                 | Putative bifunctional amine oxidase (1)                           | oxidation-reduction process [GO:0005514 biological_process] (1); oxidoreductase activity [GO:0016091 molecular_function] (1)                                                                                                                                                                                                         | FAD/NAD(P)+ binding domain [IPR037523] (1)                                                                                                                                                                                                   |                           | C_ushii_01594_mRNA_7,1  | -                    |
| GF0041353 | 0                      | 1                | 0                 | Hypothetical protein (1)                                          |                                                                                                                                                                                                                                                                                                                                      | Alpha crystallin Hg20 domain [IPR002601] (1); HSP20-like chaperone [IPR008978] (1)                                                                                                                                                           |                           | C_ushii_01594_mRNA_5,1  | -                    |
| GF0041352 | 0                      | 1                | 0                 | Hypothetical protein (1)                                          |                                                                                                                                                                                                                                                                                                                                      |                                                                                                                                                                                                                                              |                           | C_ushii_01594_mRNA_3,1  | -                    |
| GF0041351 | 0                      | 1                | 0                 | Hypothetical protein (1)                                          |                                                                                                                                                                                                                                                                                                                                      |                                                                                                                                                                                                                                              |                           | C_ushii_01594_mRNA_2,1  | -                    |
| GF0041350 | 0                      | 1                | 0                 | ATCG04670 protein (1)                                             |                                                                                                                                                                                                                                                                                                                                      |                                                                                                                                                                                                                                              |                           | C_ushii_01594_mRNA_1,1  | -                    |
| GF0041349 | 0                      | 1                | 0                 | Hypothetical protein (1)                                          |                                                                                                                                                                                                                                                                                                                                      | Reverse transcriptase, RNA-dependent DNA polymerase [IPR013103] (1); AAA-type ATPase, N-terminal domain [IPR025753] (1)                                                                                                                      |                           | C_ushii_01593_mRNA_3,1  | -                    |
| GF0041348 | 0                      | 1                | 0                 | Hypothetical protein (1)                                          |                                                                                                                                                                                                                                                                                                                                      |                                                                                                                                                                                                                                              |                           | C_ushii_01592_mRNA_2,1  | -                    |
| GF0041347 | 0                      | 1                | 0                 | Hypothetical protein (1)                                          |                                                                                                                                                                                                                                                                                                                                      |                                                                                                                                                                                                                                              |                           | C_ushii_01591_mRNA_2,1  | -                    |
| GF0041346 | 0                      | 1                | 0                 | Hypothetical protein (1)                                          |                                                                                                                                                                                                                                                                                                                                      |                                                                                                                                                                                                                                              |                           | C_ushii_01591_mRNA_14,1 | -                    |
| GF0041345 | 0                      | 1                | 0                 | Hypothetical protein (1)                                          | cysteine-type peptidase activity [GO:0008234 molecular_function] (1); proteolysis [GO:0006508 biological_process] (1)                                                                                                                                                                                                                | Ulp1 protease family, C-terminal catalytic domain [IPR030653] (1)                                                                                                                                                                            |                           | C_ushii_01590_mRNA_4,1  | -                    |
| GF0041344 | 0                      | 1                | 0                 | Hypothetical protein (1)                                          |                                                                                                                                                                                                                                                                                                                                      |                                                                                                                                                                                                                                              |                           | C_ushii_01589_mRNA_2,1  | -                    |
| GF0041343 | 0                      | 1                | 0                 | Hypothetical protein (1)                                          |                                                                                                                                                                                                                                                                                                                                      |                                                                                                                                                                                                                                              |                           | C_ushii_01589_mRNA_1,1  | -                    |
| GF0041342 | 0                      | 1                | 0                 | Hypothetical protein (1)                                          |                                                                                                                                                                                                                                                                                                                                      | Pentapeptide repeat [IPR02885] (1)                                                                                                                                                                                                           |                           | C_ushii_01588_mRNA_2,1  | -                    |
| GF0041341 | 0                      | 1                | 0                 | Hypothetical protein (1)                                          |                                                                                                                                                                                                                                                                                                                                      |                                                                                                                                                                                                                                              |                           | C_ushii_01587_mRNA_3,1  | -                    |
| GF0041340 | 0                      | 1                | 0                 | Peptide chain release factor 1 (1)                                | translational termination [GO:0006415 biological_process] (1); translation release factor activity [GO:0003147 molecular_function] (1)                                                                                                                                                                                               | Peptide chain release factor class II [IPR000352] (1); Double-stranded RNA-binding domain [IPR014720] (1)                                                                                                                                    |                           | C_ushii_01587_mRNA_2,1  | -                    |
| GF0041339 | 0                      | 1                | 0                 | Hypothetical protein (1)                                          |                                                                                                                                                                                                                                                                                                                                      |                                                                                                                                                                                                                                              |                           | C_ushii_01587_mRNA_10,1 | -                    |
| GF0041338 | 0                      | 1                | 0                 | Hypothetical protein (1)                                          |                                                                                                                                                                                                                                                                                                                                      |                                                                                                                                                                                                                                              |                           | C_ushii_01586_mRNA_7,1  | -                    |
| GF0041337 | 0                      | 1                | 0                 | Hypothetical protein (1)                                          |                                                                                                                                                                                                                                                                                                                                      |                                                                                                                                                                                                                                              |                           | C_ushii_01586_mRNA_5,1  | -                    |
| GF0041336 | 0                      | 1                | 0                 | Hypothetical protein (1)                                          |                                                                                                                                                                                                                                                                                                                                      |                                                                                                                                                                                                                                              |                           | C_ushii_01586_mRNA_3,1  | -                    |
| GF0041335 | 0                      | 1                | 0                 | Hypothetical protein (1)                                          |                                                                                                                                                                                                                                                                                                                                      |                                                                                                                                                                                                                                              |                           | C_ushii_01586_mRNA_2,1  | -                    |
| GF0041334 | 0                      | 1                | 0                 | Hypothetical protein (1)                                          |                                                                                                                                                                                                                                                                                                                                      |                                                                                                                                                                                                                                              |                           | C_ushii_01585_mRNA_9,1  | -                    |
| GF0041333 | 0                      | 1                | 0                 | Hypothetical protein (1)                                          |                                                                                                                                                                                                                                                                                                                                      |                                                                                                                                                                                                                                              |                           | C_ushii_01585_mRNA_6,1  | -                    |
| GF0041332 | 0                      | 1                | 0                 | Nonexpressed of pathogenesis-related protein 1 (1)                |                                                                                                                                                                                                                                                                                                                                      | Regulatory protein NPR, central domain [IPR024228] (1); Aikysin repeat-containing domain [IPR020683] (1); NPR1/NM-like, C-terminal [IPR021094] (1)                                                                                           |                           | C_ushii_01584_mRNA_9,1  | -                    |
| GF0041331 | 0                      | 1                | 0                 | Hypothetical protein (1)                                          |                                                                                                                                                                                                                                                                                                                                      |                                                                                                                                                                                                                                              |                           | C_ushii_01584_mRNA_7,1  | -                    |
| GF0041330 | 0                      | 1                | 0                 | Hypothetical protein (1)                                          |                                                                                                                                                                                                                                                                                                                                      |                                                                                                                                                                                                                                              |                           | C_ushii_01584_mRNA_5,1  | -                    |
| GF0041329 | 0                      | 1                | 0                 | Hypothetical protein (1)                                          |                                                                                                                                                                                                                                                                                                                                      |                                                                                                                                                                                                                                              |                           | C_ushii_01584_mRNA_1,1  | -                    |
| GF0041328 | 0                      | 1                | 0                 | Hypothetical protein (1)                                          |                                                                                                                                                                                                                                                                                                                                      |                                                                                                                                                                                                                                              |                           | C_ushii_01583_mRNA_4,1  | -                    |
| GF0041327 | 0                      | 1                | 0                 | Hypothetical protein (1)                                          |                                                                                                                                                                                                                                                                                                                                      | Zinc finger, TTF-type [IPR006580] (1); Domain of unknown function DU4471 [IPR025390] (1)                                                                                                                                                     |                           | C_ushii_01583_mRNA_2,1  | -                    |
| GF0041326 | 0                      | 1                | 0                 | Hypothetical protein (1)                                          |                                                                                                                                                                                                                                                                                                                                      |                                                                                                                                                                                                                                              |                           | C_ushii_01583_mRNA_1,1  | -                    |
| GF0041325 | 0                      | 1                | 0                 | Hypothetical protein (1)                                          |                                                                                                                                                                                                                                                                                                                                      |                                                                                                                                                                                                                                              |                           | C_ushii_01582_mRNA_2,1  | -                    |
| GF0041324 | 0                      | 1                | 0                 | Hypothetical protein (1)                                          |                                                                                                                                                                                                                                                                                                                                      |                                                                                                                                                                                                                                              |                           | C_ushii_01581_mRNA_5,1  | -                    |
| GF0041323 | 0                      | 1                | 0                 | Hypothetical protein (1)                                          |                                                                                                                                                                                                                                                                                                                                      |                                                                                                                                                                                                                                              |                           | C_ushii_01581_mRNA_2,1  | -                    |
| GF0041322 | 0                      | 1                | 0                 | Amino acid binding protein, putative (1)                          |                                                                                                                                                                                                                                                                                                                                      |                                                                                                                                                                                                                                              |                           | C_ushii_01580_mRNA_7,1  | -                    |
| GF0041321 | 0                      | 1                | 0                 | Hypothetical protein (1)                                          | cysteine-type peptidase activity [GO:0008234 molecular_function] (1); proteolysis [GO:0006508 biological_process] (1)                                                                                                                                                                                                                | Ulp1 protease family, C-terminal catalytic domain [IPR030653] (1); Domain of unknown function DU47985 [IPR015410] (1)                                                                                                                        |                           | C_ushii_01580_mRNA_3,1  | -                    |
| GF0041320 | 0                      | 1                | 0                 | E3 ubiquitin-protein ligase RNF14 (1)                             | protein ubiquitination [GO:0016567 biological_process] (1); ubiquitin-protein transferase activity [GO:0004842 molecular_function] (1); metal ion binding [GO:0046872 molecular_function] (1); zinc ion binding [GO:0008270 molecular_function] (1); protein binding [GO:0005515 molecular_function] (1)                             | Zinc finger, RING-type [IPR01841] (1); Zinc finger, RING-type, conserved site [IPR017907] (1); E3 ubiquitin ligase RBR family [IPR013271] (1); Zinc finger, RING-FYVE-PHD-type [IPR013083] (1); Zinc finger, C2HC4 RING-type [IPR018957] (1) |                           | C_ushii_01580_mRNA_2,1  | -                    |
| GF0041319 | 0                      | 1                | 0                 | RING zinc finger protein, putative (1)                            | protein ubiquitination [GO:0016567 biological_process] (1); ubiquitin-protein transferase activity [GO:0004842 molecular_function] (1); protein binding [GO:0005515 molecular_function] (1); zinc ion binding [GO:0008270 molecular_function] (1)                                                                                    | Zinc finger, RING-type, conserved site [IPR017907] (1); E3 ubiquitin ligase RBR family [IPR013271] (1); Zinc finger, RING-type [IPR01841] (1); Zinc finger, RING-FYVE-PHD-type [IPR013083] (1)                                               |                           | C_ushii_01580_mRNA_1,1  | -                    |
| GF0041318 | 0                      | 1                | 0                 | Hypothetical protein (1)                                          |                                                                                                                                                                                                                                                                                                                                      |                                                                                                                                                                                                                                              |                           | C_ushii_01579_mRNA_7,1  | -                    |
| GF0041317 | 0                      | 1                | 0                 | Hypothetical protein (1)                                          |                                                                                                                                                                                                                                                                                                                                      |                                                                                                                                                                                                                                              |                           | C_ushii_01579_mRNA_1,1  | -                    |
| GF0041316 | 0                      | 1                | 0                 | TIR-NIRS-LRR type disease resistance protein (1)                  | signal transduction [GO:0007165 biological_process] (1); protein binding [GO:0005515 molecular_function] (1)                                                                                                                                                                                                                         | Toll/interleukin-1 receptor homology (TIR) domain [IPR001571] (1); P-loop containing nucleoside triphosphate hydrolase [IPR027471] (1)                                                                                                       |                           | C_ushii_01578_mRNA_4,1  | -                    |
| GF0041315 | 0                      | 1                | 0                 | Hypothetical protein (1)                                          | protein binding [GO:0005515 molecular_function] (1); signal transduction [GO:0007165 biological_process] (1)                                                                                                                                                                                                                         | Toll/interleukin-1 receptor homology (TIR) domain [IPR001571] (1)                                                                                                                                                                            |                           | C_ushii_01578_mRNA_3,1  | -                    |
| GF0041314 | 0                      | 1                | 0                 | Hypothetical protein (1)                                          | translation release factor activity [GO:0003147 molecular_function] (1); translational termination [GO:0006415 biological_process] (1)                                                                                                                                                                                               | Peptide chain release factor class II [IPR000352] (1); Alpha/Beta hydrolase fold [IPR029058] (1); Double-stranded RNA-binding domain [IPR014720] (1)                                                                                         |                           | C_ushii_01578_mRNA_2,1  | -                    |
| GF0041313 | 0                      | 1                | 0                 | Major pollen allergen Ory s 1, putative (1)                       | extracellular region [GO:0005576 cellular_component] (1)                                                                                                                                                                                                                                                                             | Expansin, cellulose-binding like domain [IPR007117] (1); Expansin/Loi pl [IPR007118] (1); RbA-like double-psi beta-sheet domain [IPR009009] (1); Expansin/pollen allergen, DPPB domain [IPR007112] (1)                                       |                           | C_ushii_01577_mRNA_3,1  | -                    |
| GF0041312 | 0                      | 1                | 0                 | G-type lectin S-receptor-like serine/threonine-protein kinase (1) | recognition of pollen [GO:0048544 biological_process] (1)                                                                                                                                                                                                                                                                            | S-lectin glycoprotein domain [IPR000858] (1); PAN-Vaple domain [IPR005691] (1); Bulb-type lectin domain [IPR001480] (1)                                                                                                                      |                           | C_ushii_01576_mRNA_8,1  | -                    |
| GF0041311 | 0                      | 1                | 0                 | Hypothetical protein (1)                                          |                                                                                                                                                                                                                                                                                                                                      |                                                                                                                                                                                                                                              |                           | C_ushii_01576_mRNA_7,1  | -                    |
| GF0041310 | 0                      | 1                | 0                 | Hypothetical protein (1)                                          | DNA binding [GO:0003677 molecular_function] (1); protein heterodimerization activity [GO:0046982 molecular_function] (1); nucleosome [GO:0000786 cellular_component] (1)                                                                                                                                                             | Histone fold [IPR009072] (1); Histone H3CENP-A [IPR000164] (1)                                                                                                                                                                               |                           | C_ushii_01576_mRNA_1,1  | -                    |
| GF0041309 | 0                      | 1                | 0                 | Hypothetical protein (1)                                          |                                                                                                                                                                                                                                                                                                                                      |                                                                                                                                                                                                                                              |                           | C_ushii_01575_mRNA_3,1  | -                    |
| GF0041308 | 0                      | 1                | 0                 | Hypothetical protein (1)                                          |                                                                                                                                                                                                                                                                                                                                      |                                                                                                                                                                                                                                              |                           | C_ushii_01573_mRNA_7,1  | -                    |
| GF0041307 | 0                      | 1                | 0                 | Similarity to non-TR retroelement reverse transcriptase (1)       |                                                                                                                                                                                                                                                                                                                                      | Reverse transcriptase, RNA-dependent DNA polymerase [IPR013103] (1)                                                                                                                                                                          |                           | C_ushii_01573_mRNA_4,1  | -                    |
| GF0041306 | 0                      | 1                | 0                 | Hypothetical protein (1)                                          |                                                                                                                                                                                                                                                                                                                                      | Leucine-rich repeat domain, L domain-like [IPR02675] (1)                                                                                                                                                                                     |                           | C_ushii_01572_mRNA_4,1  | -                    |
| GF0041305 | 0                      | 1                | 0                 | Hypothetical protein (1)                                          | ADP binding [GO:0043531 molecular_function] (1)                                                                                                                                                                                                                                                                                      | GPN-loop GTPase [IPR004130] (1); NB-ARC [IPR002183] (1); P-loop containing nucleoside triphosphate hydrolase [IPR027471] (1); Leucine-rich repeat domain, L domain-like [IPR02675] (1)                                                       |                           | C_ushii_01572_mRNA_3,1  | -                    |
| GF0041304 | 0                      | 1                | 0                 | Hypothetical protein (1)                                          |                                                                                                                                                                                                                                                                                                                                      |                                                                                                                                                                                                                                              |                           | C_ushii_01570_mRNA_9,1  | -                    |

| ID        | Num. in <i>C. crottensteini</i> | Num. in <i>C. anolis</i> | Num. in <i>P. trifidatus</i> | Note                                                                      | GO                                                                                                                                                                                                                                                                                | InterPro                                                                                                                                                                                                                                                                       | Members in <i>C. crottensteini</i> | Members in <i>C. anolis</i> | Members in <i>P. trifidatus</i> |
|-----------|---------------------------------|--------------------------|------------------------------|---------------------------------------------------------------------------|-----------------------------------------------------------------------------------------------------------------------------------------------------------------------------------------------------------------------------------------------------------------------------------|--------------------------------------------------------------------------------------------------------------------------------------------------------------------------------------------------------------------------------------------------------------------------------|------------------------------------|-----------------------------|---------------------------------|
| GF0041303 | 0                               | 1                        | 1                            | 0 Protein SRG1 (1)                                                        | nucleic acid binding [GO:0003676 molecular_function] (1); oxidoreductase activity [GO:0016991] (1); biological_process [GO:005114] (1); oxidoreductase activity [GO:0016991] (1)                                                                                                  | Oxoglutarate-iron-dependent dioxygenase [IPRO0123] (1); leucine-rich repeat domain [IPRO02744] (1); Non-haem dioxygenase N-terminal domain [IPRO02992] (1); Ribonuclease H-like domain [IPRO12337] (1)                                                                         | -                                  | C_unihub_01570_mRNA_2.1     | -                               |
| GF0041302 | 0                               | 1                        | 1                            | 0 Hypothetical protein (1)                                                | -                                                                                                                                                                                                                                                                                 | -                                                                                                                                                                                                                                                                              | -                                  | C_unihub_01569_mRNA_6.1     | -                               |
| GF0041301 | 0                               | 1                        | 1                            | 0 Hypothetical protein (1)                                                | -                                                                                                                                                                                                                                                                                 | -                                                                                                                                                                                                                                                                              | -                                  | C_unihub_01569_mRNA_4.1     | -                               |
| GF0041300 | 0                               | 1                        | 1                            | 0 Hypothetical protein (1)                                                | -                                                                                                                                                                                                                                                                                 | -                                                                                                                                                                                                                                                                              | -                                  | C_unihub_01568_mRNA_6.1     | -                               |
| GF0041299 | 0                               | 1                        | 1                            | 0 Hypothetical protein (1)                                                | -                                                                                                                                                                                                                                                                                 | -                                                                                                                                                                                                                                                                              | -                                  | C_unihub_01568_mRNA_4.1     | -                               |
| GF0041298 | 0                               | 1                        | 1                            | 0 Hypothetical protein (1)                                                | -                                                                                                                                                                                                                                                                                 | -                                                                                                                                                                                                                                                                              | -                                  | C_unihub_01568_mRNA_3.1     | -                               |
| GF0041297 | 0                               | 1                        | 1                            | 0 Hypothetical protein (1)                                                | -                                                                                                                                                                                                                                                                                 | -                                                                                                                                                                                                                                                                              | -                                  | C_unihub_01568_mRNA_2.1     | -                               |
| GF0041296 | 0                               | 1                        | 1                            | 0 Hypothetical protein (1)                                                | -                                                                                                                                                                                                                                                                                 | -                                                                                                                                                                                                                                                                              | -                                  | C_unihub_01568_mRNA_15.1    | -                               |
| GF0041295 | 0                               | 1                        | 1                            | 0 Hypothetical protein (1)                                                | -                                                                                                                                                                                                                                                                                 | -                                                                                                                                                                                                                                                                              | -                                  | C_unihub_01568_mRNA_14.1    | -                               |
| GF0041294 | 0                               | 1                        | 1                            | 0 Hypothetical protein (1)                                                | -                                                                                                                                                                                                                                                                                 | -                                                                                                                                                                                                                                                                              | -                                  | C_unihub_01568_mRNA_12.1    | -                               |
| GF0041293 | 0                               | 1                        | 1                            | 0 Hypothetical protein (1)                                                | -                                                                                                                                                                                                                                                                                 | -                                                                                                                                                                                                                                                                              | -                                  | C_unihub_01568_mRNA_11.1    | -                               |
| GF0041292 | 0                               | 1                        | 1                            | 0 Hypothetical protein (1)                                                | -                                                                                                                                                                                                                                                                                 | -                                                                                                                                                                                                                                                                              | -                                  | C_unihub_01568_mRNA_1.1     | -                               |
| GF0041291 | 0                               | 1                        | 1                            | 0 Hypothetical protein (1)                                                | -                                                                                                                                                                                                                                                                                 | -                                                                                                                                                                                                                                                                              | -                                  | C_unihub_01567_mRNA_8.1     | -                               |
| GF0041290 | 0                               | 1                        | 1                            | 0 Hypothetical protein (1)                                                | -                                                                                                                                                                                                                                                                                 | -                                                                                                                                                                                                                                                                              | -                                  | C_unihub_01567_mRNA_1.1     | -                               |
| GF0041289 | 0                               | 1                        | 1                            | 0 Hypothetical protein (1)                                                | -                                                                                                                                                                                                                                                                                 | -                                                                                                                                                                                                                                                                              | -                                  | C_unihub_01566_mRNA_8.1     | -                               |
| GF0041288 | 0                               | 1                        | 1                            | 0 Hypothetical protein (1)                                                | -                                                                                                                                                                                                                                                                                 | -                                                                                                                                                                                                                                                                              | -                                  | C_unihub_01566_mRNA_2.1     | -                               |
| GF0041287 | 0                               | 1                        | 1                            | 0 Hypothetical protein (1)                                                | -                                                                                                                                                                                                                                                                                 | -                                                                                                                                                                                                                                                                              | -                                  | C_unihub_01566_mRNA_3.1     | -                               |
| GF0041286 | 0                               | 1                        | 1                            | 0 Hypothetical protein (1)                                                | -                                                                                                                                                                                                                                                                                 | -                                                                                                                                                                                                                                                                              | -                                  | C_unihub_01564_mRNA_5.1     | -                               |
| GF0041285 | 0                               | 1                        | 1                            | 0 Hypothetical protein (1)                                                | -                                                                                                                                                                                                                                                                                 | -                                                                                                                                                                                                                                                                              | -                                  | C_unihub_01564_mRNA_4.1     | -                               |
| GF0041284 | 0                               | 1                        | 1                            | 0 Hypothetical protein (1)                                                | -                                                                                                                                                                                                                                                                                 | -                                                                                                                                                                                                                                                                              | -                                  | C_unihub_01564_mRNA_2.1     | -                               |
| GF0041283 | 0                               | 1                        | 1                            | 0 Hypothetical protein (1)                                                | -                                                                                                                                                                                                                                                                                 | -                                                                                                                                                                                                                                                                              | -                                  | C_unihub_01564_mRNA_1.1     | -                               |
| GF0041282 | 0                               | 1                        | 1                            | 0 Hypothetical protein (1)                                                | -                                                                                                                                                                                                                                                                                 | -                                                                                                                                                                                                                                                                              | -                                  | C_unihub_01563_mRNA_1.1     | -                               |
| GF0041281 | 0                               | 1                        | 1                            | 0 Hypothetical protein (1)                                                | -                                                                                                                                                                                                                                                                                 | -                                                                                                                                                                                                                                                                              | -                                  | C_unihub_01562_mRNA_1.1     | -                               |
| GF0041280 | 0                               | 1                        | 1                            | 0 Hypothetical protein (1)                                                | protein binding [GO:0005515 molecular_function] (1)                                                                                                                                                                                                                               | F-box domain [IPRO1810] (1)                                                                                                                                                                                                                                                    | -                                  | C_unihub_01561_mRNA_8.1     | -                               |
| GF0041279 | 0                               | 1                        | 1                            | 0 Hypothetical protein (1)                                                | -                                                                                                                                                                                                                                                                                 | -                                                                                                                                                                                                                                                                              | -                                  | C_unihub_01561_mRNA_7.1     | -                               |
| GF0041278 | 0                               | 1                        | 1                            | 0 Hypothetical protein (1)                                                | -                                                                                                                                                                                                                                                                                 | -                                                                                                                                                                                                                                                                              | -                                  | C_unihub_01561_mRNA_4.1     | -                               |
| GF0041277 | 0                               | 1                        | 1                            | 0 Protein phosphatase 1 regulatory subunit 7 (1)                          | protein binding [GO:0005515 molecular_function] (1)                                                                                                                                                                                                                               | Pectin lyase fold [IPRO12334] (1); Leucine-rich repeat [IPRO1611] (1); Leucine-rich repeat domain, L domain-like [IPRO12675] (1)                                                                                                                                               | -                                  | C_unihub_01561_mRNA_3.1     | -                               |
| GF0041276 | 0                               | 1                        | 1                            | 0 Hypothetical protein (1)                                                | -                                                                                                                                                                                                                                                                                 | -                                                                                                                                                                                                                                                                              | -                                  | C_unihub_01560_mRNA_7.1     | -                               |
| GF0041275 | 0                               | 1                        | 1                            | 0 Hypothetical protein (1)                                                | -                                                                                                                                                                                                                                                                                 | -                                                                                                                                                                                                                                                                              | -                                  | C_unihub_01560_mRNA_4.1     | -                               |
| GF0041274 | 0                               | 1                        | 1                            | 0 Hypothetical protein (1)                                                | -                                                                                                                                                                                                                                                                                 | -                                                                                                                                                                                                                                                                              | -                                  | C_unihub_01559_mRNA_3.1     | -                               |
| GF0041273 | 0                               | 1                        | 1                            | 0 Serine/threonine phosphatase family, 2C domain protein (1)              | catalytic activity [GO:0003824 molecular_function] (1); protein dephosphorylation [GO:0006470 biological_process] (1); cation binding [GO:0043169 molecular_function] (1); protein serine/threonine phosphatase activity [GO:0004722 molecular_function] (1)                      | PPM-type phosphatase, divalent cation binding [IPRO0027] (1); Protein phosphatase 2C family [IPRO15655] (1); PPM-type phosphatase domain [IPRO01822] (1)                                                                                                                       | -                                  | C_unihub_01559_mRNA_2.1     | -                               |
| GF0041272 | 0                               | 1                        | 1                            | 0 Hypothetical protein (1)                                                | -                                                                                                                                                                                                                                                                                 | -                                                                                                                                                                                                                                                                              | -                                  | C_unihub_01558_mRNA_4.1     | -                               |
| GF0041271 | 0                               | 1                        | 1                            | 0 Hypothetical protein (1)                                                | -                                                                                                                                                                                                                                                                                 | -                                                                                                                                                                                                                                                                              | -                                  | C_unihub_01558_mRNA_2.1     | -                               |
| GF0041270 | 0                               | 1                        | 1                            | 0 Hypothetical protein (1)                                                | -                                                                                                                                                                                                                                                                                 | -                                                                                                                                                                                                                                                                              | -                                  | C_unihub_01558_mRNA_1.1     | -                               |
| GF0041269 | 0                               | 1                        | 1                            | 0 Hypothetical protein (1)                                                | -                                                                                                                                                                                                                                                                                 | -                                                                                                                                                                                                                                                                              | -                                  | C_unihub_01557_mRNA_8.1     | -                               |
| GF0041268 | 0                               | 1                        | 1                            | 0 Hypothetical protein (1)                                                | -                                                                                                                                                                                                                                                                                 | -                                                                                                                                                                                                                                                                              | -                                  | C_unihub_01557_mRNA_6.1     | -                               |
| GF0041267 | 0                               | 1                        | 1                            | 0 Hypothetical protein (1)                                                | -                                                                                                                                                                                                                                                                                 | -                                                                                                                                                                                                                                                                              | -                                  | C_unihub_01557_mRNA_5.1     | -                               |
| GF0041266 | 0                               | 1                        | 1                            | 0 Hypothetical protein (1)                                                | -                                                                                                                                                                                                                                                                                 | -                                                                                                                                                                                                                                                                              | -                                  | C_unihub_01557_mRNA_3.1     | -                               |
| GF0041265 | 0                               | 1                        | 1                            | 0 Hypothetical protein (1)                                                | -                                                                                                                                                                                                                                                                                 | -                                                                                                                                                                                                                                                                              | -                                  | C_unihub_01556_mRNA_9.1     | -                               |
| GF0041264 | 0                               | 1                        | 1                            | 0 Hypothetical protein (1)                                                | -                                                                                                                                                                                                                                                                                 | -                                                                                                                                                                                                                                                                              | -                                  | C_unihub_01556_mRNA_8.1     | -                               |
| GF0041263 | 0                               | 1                        | 1                            | 0 Hypothetical protein (1)                                                | -                                                                                                                                                                                                                                                                                 | -                                                                                                                                                                                                                                                                              | -                                  | C_unihub_01556_mRNA_6.1     | -                               |
| GF0041262 | 0                               | 1                        | 1                            | 0 Hypothetical protein (1)                                                | protein binding [GO:0005515 molecular_function] (1)                                                                                                                                                                                                                               | BTB/POZ domain [IPRO06210] (1)                                                                                                                                                                                                                                                 | -                                  | C_unihub_01556_mRNA_3.1     | -                               |
| GF0041261 | 0                               | 1                        | 1                            | 0 Nonexpressed of pathogenesis-related protein 1 (1)                      | protein binding [GO:0005515 molecular_function] (1)                                                                                                                                                                                                                               | Regulatory protein NPR, central domain [IPRO24228] (1); SKP1/BTB/POZ domain [IPRO11333] (1); Aukynin repeat [IPRO010] (1); BTB/POZ domain [IPRO00210] (1); NPR1/NIM1-like, C-terminal [IPRO1094] (1); Aukynin repeat-containing domain [IPRO20683] (1)                         | -                                  | C_unihub_01556_mRNA_2.1     | -                               |
| GF0041260 | 0                               | 1                        | 1                            | 0 Nonexpressed of pathogenesis-related protein 1 (1)                      | protein binding [GO:0005515 molecular_function] (1)                                                                                                                                                                                                                               | SKP1/BTB/POZ domain [IPRO11333] (1); Regulatory protein NPR, central domain [IPRO24228] (1); Aukynin repeat [IPRO010] (1); Aukynin repeat-containing domain [IPRO20683] (1); NPR1/NIM1-like, C-terminal [IPRO1094] (1); BTB/POZ domain [IPRO00210] (1)                         | -                                  | C_unihub_01556_mRNA_10.1    | -                               |
| GF0041259 | 0                               | 1                        | 1                            | 0 Hypothetical protein (1)                                                | -                                                                                                                                                                                                                                                                                 | -                                                                                                                                                                                                                                                                              | -                                  | C_unihub_01556_mRNA_1.1     | -                               |
| GF0041258 | 0                               | 1                        | 1                            | 0 Hypothetical protein (1)                                                | -                                                                                                                                                                                                                                                                                 | -                                                                                                                                                                                                                                                                              | -                                  | C_unihub_01555_mRNA_7.1     | -                               |
| GF0041257 | 0                               | 1                        | 1                            | 0 Hypothetical protein (1)                                                | -                                                                                                                                                                                                                                                                                 | -                                                                                                                                                                                                                                                                              | -                                  | C_unihub_01554_mRNA_2.1     | -                               |
| GF0041256 | 0                               | 1                        | 1                            | 0 Hypothetical protein (1)                                                | -                                                                                                                                                                                                                                                                                 | -                                                                                                                                                                                                                                                                              | -                                  | C_unihub_01553_mRNA_6.1     | -                               |
| GF0041255 | 0                               | 1                        | 1                            | 0 LRR receptor like serine/threonine-protein kinase ERL1 (1)              | protein binding [GO:0005515 molecular_function] (1)                                                                                                                                                                                                                               | Leucine-rich repeat [IPRO01611] (1); Leucine-rich repeat domain, L domain-like [IPRO12675] (1)                                                                                                                                                                                 | -                                  | C_unihub_01553_mRNA_1.1     | -                               |
| GF0041254 | 0                               | 1                        | 1                            | 0 Hypothetical protein (1)                                                | -                                                                                                                                                                                                                                                                                 | -                                                                                                                                                                                                                                                                              | -                                  | C_unihub_01552_mRNA_2.1     | -                               |
| GF0041253 | 0                               | 1                        | 1                            | 0 Hypothetical protein (1)                                                | -                                                                                                                                                                                                                                                                                 | -                                                                                                                                                                                                                                                                              | -                                  | C_unihub_01551_mRNA_4.1     | -                               |
| GF0041252 | 0                               | 1                        | 1                            | 0 Hypothetical protein (1)                                                | -                                                                                                                                                                                                                                                                                 | -                                                                                                                                                                                                                                                                              | -                                  | C_unihub_01551_mRNA_3.1     | -                               |
| GF0041251 | 0                               | 1                        | 1                            | 0 LRR receptor like serine/threonine-protein kinase EFR (1)               | protein binding [GO:0005515 molecular_function] (1)                                                                                                                                                                                                                               | Endonuclease/exonuclease/phosphatase [IPRO0135] (1); Leucine-rich repeat-containing N-terminal, plant-type [IPRO13210] (1); Leucine-rich repeat [IPRO01611] (1); Leucine-rich repeat domain, L domain-like [IPRO12675] (1); Leucine-rich repeat, typical subsp [IPRO03591] (1) | -                                  | C_unihub_01550_mRNA_5.1     | -                               |
| GF0041250 | 0                               | 1                        | 1                            | 0 Embryonic abundant protein-like (1)                                     | metabolic process [GO:0008152 biological_process] (1); methyltransferase activity [GO:0008168 molecular_function] (1)                                                                                                                                                             | S-adenosyl-L-methionine-dependent methyltransferase [IPRO29063] (1); Methyltransferase type 31 [IPRO13216] (1)                                                                                                                                                                 | -                                  | C_unihub_01549_mRNA_2.1     | -                               |
| GF0041249 | 0                               | 1                        | 1                            | 0 Hypothetical protein (1)                                                | -                                                                                                                                                                                                                                                                                 | -                                                                                                                                                                                                                                                                              | -                                  | C_unihub_01549_mRNA_1.1     | -                               |
| GF0041248 | 0                               | 1                        | 1                            | 0 Hypothetical protein (1)                                                | -                                                                                                                                                                                                                                                                                 | -                                                                                                                                                                                                                                                                              | -                                  | C_unihub_01548_mRNA_8.1     | -                               |
| GF0041247 | 0                               | 1                        | 1                            | 0 Hypothetical protein (1)                                                | -                                                                                                                                                                                                                                                                                 | -                                                                                                                                                                                                                                                                              | -                                  | C_unihub_01548_mRNA_7.1     | -                               |
| GF0041246 | 0                               | 1                        | 1                            | 0 Leucine rich repeat containing protein, putative (1)                    | protein binding [GO:0005515 molecular_function] (1); protein phosphorylation [GO:0006468 biological_process] (1); protein kinase activity [GO:0004672 molecular_function] (1)                                                                                                     | Serine-threonine/tyrosine-protein kinase catalytic domain [IPRO01245] (1); Leucine-rich repeat [IPRO01611] (1); Protein kinase-like domain [IPRO11009] (1); Leucine-rich repeat domain, L domain-like [IPRO12675] (1)                                                          | -                                  | C_unihub_01548_mRNA_6.1     | -                               |
| GF0041245 | 0                               | 1                        | 1                            | 0 Hypothetical protein (1)                                                | -                                                                                                                                                                                                                                                                                 | -                                                                                                                                                                                                                                                                              | -                                  | C_unihub_01548_mRNA_5.1     | -                               |
| GF0041244 | 0                               | 1                        | 1                            | 0 Hypothetical protein (1)                                                | -                                                                                                                                                                                                                                                                                 | -                                                                                                                                                                                                                                                                              | -                                  | C_unihub_01548_mRNA_4.1     | -                               |
| GF0041243 | 0                               | 1                        | 1                            | 0 RNA-directed DNA polymerase (Reverse transcriptase), Ribonuclease H (1) | nucleic acid binding [GO:0003676 molecular_function] (1); protein kinase activity [GO:0004672 molecular_function] (1); protein phosphorylation [GO:0006468 biological_process] (1); ATP binding [GO:0005224 molecular_function] (1)                                               | Ribonuclease H-like domain [IPRO12337] (1); Protein kinase-like domain [IPRO11009] (1); Protein kinase domain [IPRO00719] (1); Serine/threonine-protein kinase, active site [IPRO08271] (1)                                                                                    | -                                  | C_unihub_01548_mRNA_3.1     | -                               |
| GF0041242 | 0                               | 1                        | 1                            | 0 Hypothetical protein (1)                                                | -                                                                                                                                                                                                                                                                                 | -                                                                                                                                                                                                                                                                              | -                                  | C_unihub_01548_mRNA_1.1     | -                               |
| GF0041241 | 0                               | 1                        | 1                            | 0 Hypothetical protein (1)                                                | -                                                                                                                                                                                                                                                                                 | -                                                                                                                                                                                                                                                                              | -                                  | C_unihub_01547_mRNA_6.1     | -                               |
| GF0041240 | 0                               | 1                        | 1                            | 0 Hypothetical protein (1)                                                | aspartic-type endopeptidase activity [GO:0004159 molecular_function] (1); proteolysis [GO:0006968 biological_process] (1)                                                                                                                                                         | Peptidase A2A, retrovirus, catalytic [IPRO01995] (1); Retropressin [IPRO18061] (1); Aspartic peptidase domain [IPRO21109] (1)                                                                                                                                                  | -                                  | C_unihub_01547_mRNA_5.1     | -                               |
| GF0041239 | 0                               | 1                        | 1                            | 0 Hypothetical protein (1)                                                | lipid binding [GO:0008289 molecular_function] (1); lipid transport [GO:0006689 biological_process] (1)                                                                                                                                                                            | Plant lipid transfer protein Par allergen [IPRO0525] (1); Helicoidal inhibitor/plant lipid transfer protein seed storage lectin domain [IPRO16140] (1)                                                                                                                         | -                                  | C_unihub_01547_mRNA_13.1    | -                               |
| GF0041238 | 0                               | 1                        | 1                            | 0 Hypothetical protein (1)                                                | -                                                                                                                                                                                                                                                                                 | -                                                                                                                                                                                                                                                                              | -                                  | C_unihub_01547_mRNA_12.1    | -                               |
| GF0041237 | 0                               | 1                        | 1                            | 0 Hypothetical protein (1)                                                | -                                                                                                                                                                                                                                                                                 | -                                                                                                                                                                                                                                                                              | -                                  | C_unihub_01546_mRNA_4.1     | -                               |
| GF0041236 | 0                               | 1                        | 1                            | 0 Hypothetical protein (1)                                                | -                                                                                                                                                                                                                                                                                 | -                                                                                                                                                                                                                                                                              | -                                  | C_unihub_01546_mRNA_3.1     | -                               |
| GF0041235 | 0                               | 1                        | 1                            | 0 Hypothetical protein (1)                                                | -                                                                                                                                                                                                                                                                                 | -                                                                                                                                                                                                                                                                              | -                                  | C_unihub_01545_mRNA_8.1     | -                               |
| GF0041234 | 0                               | 1                        | 1                            | 0 Hypothetical protein (1)                                                | ATP binding [GO:0005224 molecular_function] (1); microtubule binding [GO:0000166 molecular_function] (1); RNA annealing [GO:0009800] (1); Cysteine-RNA synthetase/miRNase [GO:0004818 biological_process] (1); aminoacyl-tRNA ligase activity [GO:0004812 molecular_function] (1) | Aminoacyl-tRNA synthetase, class 1a, anticodon-binding [IPRO09800] (1); Cysteine-RNA synthetase/miRNase [IPRO24909] (1)                                                                                                                                                        | -                                  | C_unihub_01545_mRNA_7.1     | -                               |
| GF0041233 | 0                               | 1                        | 1                            | 0 Hypothetical protein (1)                                                | -                                                                                                                                                                                                                                                                                 | -                                                                                                                                                                                                                                                                              | -                                  | C_unihub_01544_mRNA_6.1     | -                               |
| GF0041232 | 0                               | 1                        | 1                            | 0 Hypothetical protein (1)                                                | -                                                                                                                                                                                                                                                                                 | -                                                                                                                                                                                                                                                                              | -                                  | C_unihub_01544_mRNA_5.1     | -                               |
| GF0041231 | 0                               | 1                        | 1                            | 0 Hypothetical protein (1)                                                | -                                                                                                                                                                                                                                                                                 | -                                                                                                                                                                                                                                                                              | -                                  | C_unihub_01543_mRNA_3.1     | -                               |
| GF0041230 | 0                               | 1                        | 1                            | 0 Hypothetical protein (1)                                                | -                                                                                                                                                                                                                                                                                 | -                                                                                                                                                                                                                                                                              | -                                  | C_unihub_01543_mRNA_1.1     | -                               |
| GF0041229 | 0                               | 1                        | 1                            | 0 Hypothetical protein (1)                                                | RNA-DNA hybrid ribonuclease activity [GO:0004523 molecular_function] (1); nucleic acid binding [GO:0003676 molecular_function] (1)                                                                                                                                                | Retrotransposon gag domain [IPRO05162] (1); Ribonuclease H-like domain [IPRO12571] (1); Ribonuclease H domain [IPRO2156] (1)                                                                                                                                                   | -                                  | C_unihub_01542_mRNA_4.1     | -                               |
| GF0041228 | 0                               | 1                        | 1                            | 0 Putative non-LTR retroelement reverse transcriptase, related (1)        | -                                                                                                                                                                                                                                                                                 | -                                                                                                                                                                                                                                                                              | -                                  | C_unihub_01542_mRNA_1.1     | -                               |
| GF0041227 | 0                               | 1                        | 1                            | 0 Hypothetical protein (1)                                                | -                                                                                                                                                                                                                                                                                 | -                                                                                                                                                                                                                                                                              | -                                  | C_unihub_01541_mRNA_8.1     | -                               |
| GF0041226 | 0                               | 1                        | 1                            | 0 Hypothetical protein (1)                                                | -                                                                                                                                                                                                                                                                                 | -                                                                                                                                                                                                                                                                              | -                                  | C_unihub_01541_mRNA_6.1     | -                               |
| GF0041225 | 0                               | 1                        | 1                            | 0 Hypothetical protein (1)                                                | nucleic acid binding [GO:0003676 molecular_function] (1)                                                                                                                                                                                                                          | Ribonuclease H-like domain [IPRO12337] (1); Alpha/Beta hydrolase fold [IPRO29058] (1)                                                                                                                                                                                          | -                                  | C_unihub_01541_mRNA_5.1     | -                               |
| GF0041224 | 0                               | 1                        | 1                            | 0 Hypothetical protein (1)                                                | -                                                                                                                                                                                                                                                                                 | -                                                                                                                                                                                                                                                                              | -                                  | C_unihub_01541_mRNA_3.1     | -                               |
| GF0041223 | 0                               | 1                        | 1                            | 0 Disaccharide hydrolase family, putative (1)                             | hydrolase activity [GO:0016787 molecular_function] (1)                                                                                                                                                                                                                            | Alpha/Beta hydrolase fold [IPRO29058] (1); Disaccharide hydrolase [IPRO29225] (1)                                                                                                                                                                                              | -                                  | C_unihub_01541_mRNA_1.1     | -                               |
| GF0041222 | 0                               | 1                        | 1                            | 0 Cytokinin riboside 5'-monophosphate phosphoribidylase (1)               | -                                                                                                                                                                                                                                                                                 | -                                                                                                                                                                                                                                                                              | -                                  | C_unihub_01540_mRNA_8.1     | -                               |
| GF0041221 | 0                               | 1                        | 1                            | 0 Hypothetical protein (1)                                                | -                                                                                                                                                                                                                                                                                 | -                                                                                                                                                                                                                                                                              | -                                  | C_unihub_01540_mRNA_5.1     | -                               |

| ID        | Num. in C. crottensteini | Num. in C. nuda | Num. in P. putida | Note                                                                    | GO                                                                                                                                                                                                                                                                                                                                                                                                                                                            | InterPro                                                                                                                                                                                                                                                                                                                                                                                                                                                                                                                                            | Members in C. crottensteini | Members in C. nuda     | Members in P. putida |
|-----------|--------------------------|-----------------|-------------------|-------------------------------------------------------------------------|---------------------------------------------------------------------------------------------------------------------------------------------------------------------------------------------------------------------------------------------------------------------------------------------------------------------------------------------------------------------------------------------------------------------------------------------------------------|-----------------------------------------------------------------------------------------------------------------------------------------------------------------------------------------------------------------------------------------------------------------------------------------------------------------------------------------------------------------------------------------------------------------------------------------------------------------------------------------------------------------------------------------------------|-----------------------------|------------------------|----------------------|
| GF0041220 | 0                        | 1               | 0                 | Disease resistance family protein / LRR family protein, putative (1)    | protein binding [GO:0005515 molecular_function] (1)                                                                                                                                                                                                                                                                                                                                                                                                           | Leucine-rich repeat [IPR01611] (1); Leucine-rich repeat-containing N-terminal, plant-type [IPR013210] (1); Leucine-rich repeat, typical subtype [IPR003911] (1); Leucine-rich repeat domain, I domain-like [IPR032675] (1)                                                                                                                                                                                                                                                                                                                          |                             | C_uni96_01559_mRNA_6.1 | -                    |
| GF0041219 | 0                        | 1               | 0                 | Hypothetical protein (1)                                                | cellulose biosynthetic process [GO:003244 biological_process] (1); membrane [GO:0016029 cellular_component] (1); cellulose synthase (UDP-forming) activity [GO:0016760 molecular_function] (1)                                                                                                                                                                                                                                                                | Cellulose synthase [IPR005150] (1)                                                                                                                                                                                                                                                                                                                                                                                                                                                                                                                  |                             | C_uni96_01559_mRNA_5.1 | -                    |
| GF0041218 | 0                        | 1               | 0                 | Cellulose synthase-like protein H1 (1)                                  |                                                                                                                                                                                                                                                                                                                                                                                                                                                               |                                                                                                                                                                                                                                                                                                                                                                                                                                                                                                                                                     |                             | C_uni96_01559_mRNA_4.1 | -                    |
| GF0041217 | 0                        | 1               | 0                 | Hypothetical protein (1)                                                |                                                                                                                                                                                                                                                                                                                                                                                                                                                               |                                                                                                                                                                                                                                                                                                                                                                                                                                                                                                                                                     |                             | C_uni96_01559_mRNA_2.1 | -                    |
| GF0041216 | 0                        | 1               | 0                 | Ankyrin repeat protein (1)                                              | protein binding [GO:0005515 molecular_function] (1)                                                                                                                                                                                                                                                                                                                                                                                                           | Ankyrin repeat-containing domain [IPR020853] (1); Ankyrin repeat [IPR002110] (1)                                                                                                                                                                                                                                                                                                                                                                                                                                                                    |                             | C_uni96_01557_mRNA_9.1 | -                    |
| GF0041215 | 0                        | 1               | 0                 | Hypothetical protein (1)                                                |                                                                                                                                                                                                                                                                                                                                                                                                                                                               |                                                                                                                                                                                                                                                                                                                                                                                                                                                                                                                                                     |                             | C_uni96_01557_mRNA_7.1 | -                    |
| GF0041214 | 0                        | 1               | 0                 | Hypothetical protein (1)                                                |                                                                                                                                                                                                                                                                                                                                                                                                                                                               |                                                                                                                                                                                                                                                                                                                                                                                                                                                                                                                                                     |                             | C_uni96_01557_mRNA_4.1 | -                    |
| GF0041213 | 0                        | 1               | 0                 | Hypothetical protein (1)                                                |                                                                                                                                                                                                                                                                                                                                                                                                                                                               |                                                                                                                                                                                                                                                                                                                                                                                                                                                                                                                                                     |                             | C_uni96_01557_mRNA_3.1 | -                    |
| GF0041212 | 0                        | 1               | 0                 | Hypothetical protein (1)                                                |                                                                                                                                                                                                                                                                                                                                                                                                                                                               |                                                                                                                                                                                                                                                                                                                                                                                                                                                                                                                                                     |                             | C_uni96_01556_mRNA_1.1 | -                    |
| GF0041211 | 0                        | 1               | 0                 | Hypothetical protein (1)                                                | binding [GO:0005488 molecular_function] (1)                                                                                                                                                                                                                                                                                                                                                                                                                   | MIF4G-like domain [IPR016021] (1); Armadillo-type ARM [IPR016024] (1); Initiation factor eIF-4 gamma, MA3 [IPR003891] (1)                                                                                                                                                                                                                                                                                                                                                                                                                           |                             | C_uni96_01555_mRNA_5.1 | -                    |
| GF0041210 | 0                        | 1               | 0                 | Hypothetical protein (1)                                                |                                                                                                                                                                                                                                                                                                                                                                                                                                                               |                                                                                                                                                                                                                                                                                                                                                                                                                                                                                                                                                     |                             | C_uni96_01555_mRNA_4.1 | -                    |
| GF0041209 | 0                        | 1               | 0                 | 5-methyltetrahydropteroylglutamate-homocysteine S-methyltransferase (1) | methionine biosynthetic process [GO:0009086 biological_process] (1); zinc ion binding [GO:0008270 molecular_function] (1); cellular amino acid biosynthetic process [GO:0008652 biological_process] (1); S-methyltetrahydropteroylglutamate-homocysteine S-methyltransferase activity [GO:0000387 molecular_function] (1)                                                                                                                                     | Cobalamin-independent methionine synthase MetE, C-terminal/archaeal [IPR026293] (1); Cobalamin-independent methionine synthase Met, N-terminal [IPR013215] (1)                                                                                                                                                                                                                                                                                                                                                                                      |                             | C_uni96_01555_mRNA_2.1 | -                    |
| GF0041208 | 0                        | 1               | 0                 | Hypothetical protein (1)                                                |                                                                                                                                                                                                                                                                                                                                                                                                                                                               |                                                                                                                                                                                                                                                                                                                                                                                                                                                                                                                                                     |                             | C_uni96_01554_mRNA_9.1 | -                    |
| GF0041207 | 0                        | 1               | 0                 | Hypothetical protein (1)                                                |                                                                                                                                                                                                                                                                                                                                                                                                                                                               |                                                                                                                                                                                                                                                                                                                                                                                                                                                                                                                                                     |                             | C_uni96_01554_mRNA_8.1 | -                    |
| GF0041206 | 0                        | 1               | 0                 | Hypothetical protein (1)                                                |                                                                                                                                                                                                                                                                                                                                                                                                                                                               | Viral movement protein [IPR028919] (1)                                                                                                                                                                                                                                                                                                                                                                                                                                                                                                              |                             | C_uni96_01553_mRNA_9.1 | -                    |
| GF0041205 | 0                        | 1               | 0                 | Hypothetical protein (1)                                                |                                                                                                                                                                                                                                                                                                                                                                                                                                                               |                                                                                                                                                                                                                                                                                                                                                                                                                                                                                                                                                     |                             | C_uni96_01553_mRNA_8.1 | -                    |
| GF0041204 | 0                        | 1               | 0                 | Hypothetical protein (1)                                                |                                                                                                                                                                                                                                                                                                                                                                                                                                                               |                                                                                                                                                                                                                                                                                                                                                                                                                                                                                                                                                     |                             | C_uni96_01553_mRNA_5.1 | -                    |
| GF0041203 | 0                        | 1               | 0                 | Hypothetical protein (1)                                                |                                                                                                                                                                                                                                                                                                                                                                                                                                                               |                                                                                                                                                                                                                                                                                                                                                                                                                                                                                                                                                     |                             | C_uni96_01551_mRNA_8.1 | -                    |
| GF0041202 | 0                        | 1               | 0                 | Hypothetical protein (1)                                                |                                                                                                                                                                                                                                                                                                                                                                                                                                                               |                                                                                                                                                                                                                                                                                                                                                                                                                                                                                                                                                     |                             | C_uni96_01551_mRNA_7.1 | -                    |
| GF0041201 | 0                        | 1               | 0                 | Putative disease resistance gene NBS-LRR family protein (1)             | ADP binding [GO:0043531 molecular_function] (1)                                                                                                                                                                                                                                                                                                                                                                                                               | Leucine-rich repeat domain, I domain-like [IPR026275] (1); P-loop containing nucleoside triphosphate hydrolase [IPR027417] (1); NB-ARC [IPR002182] (1)                                                                                                                                                                                                                                                                                                                                                                                              |                             | C_uni96_01551_mRNA_6.1 | -                    |
| GF0041200 | 0                        | 1               | 0                 | Hypothetical protein (1)                                                |                                                                                                                                                                                                                                                                                                                                                                                                                                                               | Retromer-spanning gag domain [IPR005162] (1)                                                                                                                                                                                                                                                                                                                                                                                                                                                                                                        |                             | C_uni96_01551_mRNA_5.1 | -                    |
| GF0041199 | 0                        | 1               | 0                 | Hypothetical protein (1)                                                |                                                                                                                                                                                                                                                                                                                                                                                                                                                               | Reverse transcriptase domain [IPR004477] (1)                                                                                                                                                                                                                                                                                                                                                                                                                                                                                                        |                             | C_uni96_01551_mRNA_2.1 | -                    |
| GF0041198 | 0                        | 1               | 0                 | Hypothetical protein (1)                                                |                                                                                                                                                                                                                                                                                                                                                                                                                                                               |                                                                                                                                                                                                                                                                                                                                                                                                                                                                                                                                                     |                             | C_uni96_01550_mRNA_7.1 | -                    |
| GF0041197 | 0                        | 1               | 0                 | Hypothetical protein (1)                                                |                                                                                                                                                                                                                                                                                                                                                                                                                                                               |                                                                                                                                                                                                                                                                                                                                                                                                                                                                                                                                                     |                             | C_uni96_01550_mRNA_6.1 | -                    |
| GF0041196 | 0                        | 1               | 0                 | Hypothetical protein (1)                                                |                                                                                                                                                                                                                                                                                                                                                                                                                                                               |                                                                                                                                                                                                                                                                                                                                                                                                                                                                                                                                                     |                             | C_uni96_01550_mRNA_4.1 | -                    |
| GF0041195 | 0                        | 1               | 0                 | Hypothetical protein (1)                                                |                                                                                                                                                                                                                                                                                                                                                                                                                                                               | Aspartic peptidase domain [IPR021109] (1)                                                                                                                                                                                                                                                                                                                                                                                                                                                                                                           |                             | C_uni96_01550_mRNA_3.1 | -                    |
| GF0041194 | 0                        | 1               | 0                 | Hypothetical protein (1)                                                |                                                                                                                                                                                                                                                                                                                                                                                                                                                               |                                                                                                                                                                                                                                                                                                                                                                                                                                                                                                                                                     |                             | C_uni96_01550_mRNA_2.1 | -                    |
| GF0041193 | 0                        | 1               | 0                 | Putative tmdR family transposase-like (1)                               | zinc ion binding [GO:0008270 molecular_function] (1)                                                                                                                                                                                                                                                                                                                                                                                                          | Zinc finger, SWIM-type [IPR007527] (1); MULE transposase domain [IPR018289] (1); Zinc finger, PMZ-type [IPR006564] (1)                                                                                                                                                                                                                                                                                                                                                                                                                              |                             | C_uni96_01550_mRNA_1.1 | -                    |
| GF0041192 | 0                        | 1               | 0                 | Hypothetical protein (1)                                                |                                                                                                                                                                                                                                                                                                                                                                                                                                                               |                                                                                                                                                                                                                                                                                                                                                                                                                                                                                                                                                     |                             | C_uni96_01529_mRNA_4.1 | -                    |
| GF0041191 | 0                        | 1               | 0                 | Hypothetical protein (1)                                                |                                                                                                                                                                                                                                                                                                                                                                                                                                                               |                                                                                                                                                                                                                                                                                                                                                                                                                                                                                                                                                     |                             | C_uni96_01529_mRNA_3.1 | -                    |
| GF0041190 | 0                        | 1               | 0                 | Hypothetical protein (1)                                                |                                                                                                                                                                                                                                                                                                                                                                                                                                                               |                                                                                                                                                                                                                                                                                                                                                                                                                                                                                                                                                     |                             | C_uni96_01529_mRNA_1.1 | -                    |
| GF0041189 | 0                        | 1               | 0                 | Hypothetical protein (1)                                                | nucleic acid binding [GO:0003676 molecular_function] (1)                                                                                                                                                                                                                                                                                                                                                                                                      | Ribonuclease H-like domain [IPR012337] (1)                                                                                                                                                                                                                                                                                                                                                                                                                                                                                                          |                             | C_uni96_01527_mRNA_3.1 | -                    |
| GF0041188 | 0                        | 1               | 0                 | Hypothetical protein (1)                                                |                                                                                                                                                                                                                                                                                                                                                                                                                                                               |                                                                                                                                                                                                                                                                                                                                                                                                                                                                                                                                                     |                             | C_uni96_01527_mRNA_2.1 | -                    |
| GF0041187 | 0                        | 1               | 0                 | Hypothetical protein (1)                                                |                                                                                                                                                                                                                                                                                                                                                                                                                                                               |                                                                                                                                                                                                                                                                                                                                                                                                                                                                                                                                                     |                             | C_uni96_01526_mRNA_5.1 | -                    |
| GF0041186 | 0                        | 1               | 0                 | Hypothetical protein (1)                                                |                                                                                                                                                                                                                                                                                                                                                                                                                                                               |                                                                                                                                                                                                                                                                                                                                                                                                                                                                                                                                                     |                             | C_uni96_01526_mRNA_3.1 | -                    |
| GF0041185 | 0                        | 1               | 0                 | Hypothetical protein (1)                                                |                                                                                                                                                                                                                                                                                                                                                                                                                                                               |                                                                                                                                                                                                                                                                                                                                                                                                                                                                                                                                                     |                             | C_uni96_01526_mRNA_2.1 | -                    |
| GF0041184 | 0                        | 1               | 0                 | Hypothetical protein (1)                                                |                                                                                                                                                                                                                                                                                                                                                                                                                                                               |                                                                                                                                                                                                                                                                                                                                                                                                                                                                                                                                                     |                             | C_uni96_01524_mRNA_3.1 | -                    |
| GF0041183 | 0                        | 1               | 0                 | Hypothetical protein (1)                                                |                                                                                                                                                                                                                                                                                                                                                                                                                                                               | Retromer-spanning gag domain [IPR005162] (1)                                                                                                                                                                                                                                                                                                                                                                                                                                                                                                        |                             | C_uni96_01524_mRNA_2.1 | -                    |
| GF0041182 | 0                        | 1               | 0                 | Hypothetical protein (1)                                                |                                                                                                                                                                                                                                                                                                                                                                                                                                                               | LAG-family [IPR011100] (1)                                                                                                                                                                                                                                                                                                                                                                                                                                                                                                                          |                             | C_uni96_01524_mRNA_1.1 | -                    |
| GF0041181 | 0                        | 1               | 0                 | ATP-citrate synthase alpha chain protein 3 (1)                          |                                                                                                                                                                                                                                                                                                                                                                                                                                                               | Succinyl-CoA synthetase-like [IPR016102] (1); ATP-citrate synthase, citrate-binding domain [IPR032263] (1)                                                                                                                                                                                                                                                                                                                                                                                                                                          |                             | C_uni96_01523_mRNA_5.1 | -                    |
| GF0041180 | 0                        | 1               | 0                 | Hypothetical protein (1)                                                |                                                                                                                                                                                                                                                                                                                                                                                                                                                               |                                                                                                                                                                                                                                                                                                                                                                                                                                                                                                                                                     |                             | C_uni96_01523_mRNA_3.1 | -                    |
| GF0041179 | 0                        | 1               | 0                 | Hypothetical protein (1)                                                | protein phosphorylation [GO:0006468 biological_process] (1); protein kinase activity [GO:0004672 molecular_function] (1); ATP binding [GO:0005244 molecular_function] (1); hydrolase activity, hydrolyzing O-glycosyl compounds [GO:0004555 molecular_function] (1); chitinase activity [GO:0004568 molecular_function] (1); carbohydrate metabolic process [GO:0005975 biological_process] (1); chitin catabolic process [GO:0006032 biological_process] (1) | Protein kinase domain [IPR000719] (1); Chitinase II [IPR011583] (1); Glycoside hydrolase, catalytic domain [IPR013781] (1); Concanavalin A-like lectin/glycanase domain [IPR013320] (1); Glycoside hydrolase superfamily [IPR007852] (1); Protein kinase-like domain [IPR011009] (1); Serine/threonine dual specificity protein kinase catalytic domain [IPR002290] (1); Glycoside hydrolase family 18, catalytic domain [IPR001223] (1); Chitinase insertions domain [IPR029070] (1); Serine/threonine-protein kinase, active site [IPR008271] (1) |                             | C_uni96_01523_mRNA_1.1 | -                    |
| GF0041178 | 0                        | 1               | 0                 | Hypothetical protein (1)                                                | cohesin core heterodimer [GO:0008280 cellular_component] (1); chromatin binding [GO:0003682 molecular_function] (1); DNA repair [GO:0006281 biological_process] (1); mitotic sister chromatid cohesion [GO:0007864 biological_process] (1)                                                                                                                                                                                                                    | RecF/RecN/SMC, N-terminal [IPR003395] (1); P-loop containing nucleoside triphosphate hydrolase [IPR027417] (1); Structural maintenance of chromosomes protein 3 [IPR029685] (1)                                                                                                                                                                                                                                                                                                                                                                     |                             | C_uni96_01522_mRNA_6.1 | -                    |
| GF0041177 | 0                        | 1               | 0                 | Hypothetical protein (1)                                                |                                                                                                                                                                                                                                                                                                                                                                                                                                                               | Concanavalin A-like lectin/glycanase domain [IPR013320] (1)                                                                                                                                                                                                                                                                                                                                                                                                                                                                                         |                             | C_uni96_01522_mRNA_5.1 | -                    |
| GF0041176 | 0                        | 1               | 0                 | Putative RNA-dependent RNA polymerase 2 (1)                             | RNA-directed RNA polymerase activity [GO:0003968 molecular_function] (1)                                                                                                                                                                                                                                                                                                                                                                                      | RNA-dependent RNA polymerase, eukaryotic-type [IPR007855] (1)                                                                                                                                                                                                                                                                                                                                                                                                                                                                                       |                             | C_uni96_01521_mRNA_6.1 | -                    |
| GF0041175 | 0                        | 1               | 0                 | Ankyrin repeat family protein (1)                                       |                                                                                                                                                                                                                                                                                                                                                                                                                                                               | PGG domain [IPR026961] (1)                                                                                                                                                                                                                                                                                                                                                                                                                                                                                                                          |                             | C_uni96_01521_mRNA_2.1 | -                    |
| GF0041174 | 0                        | 1               | 0                 | Hypothetical protein (1)                                                |                                                                                                                                                                                                                                                                                                                                                                                                                                                               |                                                                                                                                                                                                                                                                                                                                                                                                                                                                                                                                                     |                             | C_uni96_01520_mRNA_6.1 | -                    |
| GF0041173 | 0                        | 1               | 0                 | Hypothetical protein (1)                                                |                                                                                                                                                                                                                                                                                                                                                                                                                                                               |                                                                                                                                                                                                                                                                                                                                                                                                                                                                                                                                                     |                             | C_uni96_01520_mRNA_2.1 | -                    |
| GF0041172 | 0                        | 1               | 0                 | Hypothetical protein (1)                                                |                                                                                                                                                                                                                                                                                                                                                                                                                                                               |                                                                                                                                                                                                                                                                                                                                                                                                                                                                                                                                                     |                             | C_uni96_01520_mRNA_1.1 | -                    |
| GF0041171 | 0                        | 1               | 0                 | Hypothetical protein (1)                                                | calcium ion binding [GO:0005509 molecular_function] (1); protein phosphorylation [GO:0006468 biological_process] (1); protein kinase activity [GO:0004672 molecular_function] (1); ATP binding [GO:0005244 molecular_function] (1)                                                                                                                                                                                                                            | EF-Hand 1, calcium-binding site [IPR018247] (1); Serine/threonine-protein kinase, active site [IPR000719] (1); Protein kinase, ATP binding site [IPR017411] (1); Serine/threonine dual specificity protein kinase, catalytic domain [IPR002290] (1); EF-Hand domain [IPR000348] (1); Protein kinase-like domain [IPR011009] (1); EF-hand domain pair [IPR011992] (1); Protein kinase domain [IPR000719] (1)                                                                                                                                         |                             | C_uni96_01519_mRNA_4.1 | -                    |
| GF0041170 | 0                        | 1               | 0                 | Hypothetical protein (1)                                                |                                                                                                                                                                                                                                                                                                                                                                                                                                                               | Gag-polypeptide of LTR copia-type [IPR029472] (1)                                                                                                                                                                                                                                                                                                                                                                                                                                                                                                   |                             | C_uni96_01518_mRNA_8.1 | -                    |
| GF0041169 | 0                        | 1               | 0                 | Polynucleotide transferase, Ribonuclease H 644 (1)                      |                                                                                                                                                                                                                                                                                                                                                                                                                                                               | Reverse transcriptase zinc-binding domain [IPR026961] (1)                                                                                                                                                                                                                                                                                                                                                                                                                                                                                           |                             | C_uni96_01517_mRNA_6.1 | -                    |
| GF0041168 | 0                        | 1               | 0                 | Hypothetical protein (1)                                                |                                                                                                                                                                                                                                                                                                                                                                                                                                                               |                                                                                                                                                                                                                                                                                                                                                                                                                                                                                                                                                     |                             | C_uni96_01517_mRNA_4.1 | -                    |
| GF0041167 | 0                        | 1               | 0                 | Hypothetical protein (1)                                                |                                                                                                                                                                                                                                                                                                                                                                                                                                                               | Endonuclease/exonuclease/phosphatase [IPR001351] (1)                                                                                                                                                                                                                                                                                                                                                                                                                                                                                                |                             | C_uni96_01517_mRNA_3.1 | -                    |
| GF0041166 | 0                        | 1               | 0                 | Hypothetical protein (1)                                                |                                                                                                                                                                                                                                                                                                                                                                                                                                                               |                                                                                                                                                                                                                                                                                                                                                                                                                                                                                                                                                     |                             | C_uni96_01517_mRNA_2.1 | -                    |
| GF0041165 | 0                        | 1               | 0                 | Hypothetical protein (1)                                                | protein binding [GO:0005515 molecular_function] (1)                                                                                                                                                                                                                                                                                                                                                                                                           | Leucine-rich repeat domain, I domain-like [IPR032675] (1); Leucine-rich repeat [IPR001611] (1)                                                                                                                                                                                                                                                                                                                                                                                                                                                      |                             | C_uni96_01517_mRNA_1.1 | -                    |
| GF0041164 | 0                        | 1               | 0                 | Hypothetical protein (1)                                                |                                                                                                                                                                                                                                                                                                                                                                                                                                                               |                                                                                                                                                                                                                                                                                                                                                                                                                                                                                                                                                     |                             | C_uni96_01516_mRNA_8.1 | -                    |
| GF0041163 | 0                        | 1               | 0                 | Hypothetical protein (1)                                                |                                                                                                                                                                                                                                                                                                                                                                                                                                                               |                                                                                                                                                                                                                                                                                                                                                                                                                                                                                                                                                     |                             | C_uni96_01516_mRNA_7.1 | -                    |
| GF0041162 | 0                        | 1               | 0                 | Hypothetical protein (1)                                                | base activity [GO:0016829 molecular_function] (1); terpene synthase activity [GO:0001033 molecular_function] (1); metabolic process [GO:0008152 biological_process] (1)                                                                                                                                                                                                                                                                                       | Terpene synthase, N-terminal domain [IPR001906] (1); Terpenoid cyclase/protein geranyltransferase alpha-tosyl [IPR008930] (1)                                                                                                                                                                                                                                                                                                                                                                                                                       |                             | C_uni96_01516_mRNA_5.1 | -                    |
| GF0041161 | 0                        | 1               | 0                 | Delta-cadinene synthase isozyme XC1 (1)                                 | magnesium ion binding [GO:0000287 molecular_function] (1); base activity [GO:0016829 molecular_function] (1); base activity [GO:0001033 molecular_function] (1); terpene synthase activity [GO:0001033 molecular_function] (1)                                                                                                                                                                                                                                | Terpene synthase, metal-binding domain [IPR005630] (1); Isoprenoid synthase domain [IPR008949] (1)                                                                                                                                                                                                                                                                                                                                                                                                                                                  |                             | C_uni96_01516_mRNA_4.1 | -                    |
| GF0041160 | 0                        | 1               | 0                 | Hypothetical protein (1)                                                | base activity [GO:0016829 molecular_function] (1); magnesium ion binding [GO:0000287 molecular_function] (1)                                                                                                                                                                                                                                                                                                                                                  | Terpene synthase, metal-binding domain [IPR005630] (1); Isoprenoid synthase domain [IPR008949] (1)                                                                                                                                                                                                                                                                                                                                                                                                                                                  |                             | C_uni96_01516_mRNA_3.1 | -                    |
| GF0041159 | 0                        | 1               | 0                 | Delta-cadinene synthase isozyme XC14 (1)                                | base activity [GO:0016829 molecular_function] (1); terpene synthase activity [GO:0001033 molecular_function] (1); metabolic process [GO:0008152 biological_process] (1)                                                                                                                                                                                                                                                                                       | Terpenoid cyclase/protein geranyltransferase alpha-tosyl [IPR008930] (1); Terpene synthase, N-terminal domain [IPR001906] (1)                                                                                                                                                                                                                                                                                                                                                                                                                       |                             | C_uni96_01516_mRNA_2.1 | -                    |
| GF0041158 | 0                        | 1               | 0                 | Hypothetical protein (1)                                                |                                                                                                                                                                                                                                                                                                                                                                                                                                                               | Pentapeptide repeat [IPR020285] (1)                                                                                                                                                                                                                                                                                                                                                                                                                                                                                                                 |                             | C_uni96_01515_mRNA_7.1 | -                    |
| GF0041157 | 0                        | 1               | 0                 | Phosphatidylinositol 4-kinase alpha 2 (1)                               | phosphatidylinositol-mediated signaling [GO:004815 biological_process] (1); phosphatidylinositol phosphorylation [GO:0046854 biological_process] (1); phosphotransferase activity, alcohol group as acceptor [GO:0010673 molecular_function] (1)                                                                                                                                                                                                              | Protein kinase-like domain [IPR011009] (1); Phosphatidylinositol 3-4-kinase, catalytic domain [IPR004033] (1); Phosphatidylinositol 3-4-kinase, conserved site [IPR018936] (1); Phosphatidylinositol kinase [IPR015433] (1)                                                                                                                                                                                                                                                                                                                         |                             | C_uni96_01515_mRNA_3.1 | -                    |
| GF0041156 | 0                        | 1               | 0                 | Hypothetical protein (1)                                                |                                                                                                                                                                                                                                                                                                                                                                                                                                                               |                                                                                                                                                                                                                                                                                                                                                                                                                                                                                                                                                     |                             | C_uni96_01515_mRNA_2.1 | -                    |
| GF0041155 | 0                        | 1               | 0                 | Hypothetical protein (1)                                                |                                                                                                                                                                                                                                                                                                                                                                                                                                                               |                                                                                                                                                                                                                                                                                                                                                                                                                                                                                                                                                     |                             | C_uni96_01515_mRNA_1.1 | -                    |

| ID        | Num. in C. eimeriae | Num. in C. canalis | Num. in P. putida | Note                                                       | GO                                                                                                                                                                                                                                                                                                                                                               | InterPro                                                                                                                                                                                                                                                                                                                                                                                                                                 | Members in C. eimeriae | Members in C. canalis   | Members in P. putida |
|-----------|---------------------|--------------------|-------------------|------------------------------------------------------------|------------------------------------------------------------------------------------------------------------------------------------------------------------------------------------------------------------------------------------------------------------------------------------------------------------------------------------------------------------------|------------------------------------------------------------------------------------------------------------------------------------------------------------------------------------------------------------------------------------------------------------------------------------------------------------------------------------------------------------------------------------------------------------------------------------------|------------------------|-------------------------|----------------------|
| GF0041154 | 0                   | 1                  | 1                 | 0 LysM type receptor kinase (1)                            | ATP binding [GO:0005524 molecular_function] (1); protein phosphorylation [GO:0006468 biological_process] (1); protein kinase activity [GO:0004672 molecular_function] (1)                                                                                                                                                                                        | Alkaline phosphatase D-related [IPR019861] (1); Metallo-dependent phosphatase-like [IPR029052] (1); Protein kinase domain [IPR000719] (1); Protein kinase-like domain [IPR01009] (1); Concavallin A-like lectin glucanase domain [IPR033230] (1)                                                                                                                                                                                         | -                      | C_uni98_01514_mRNA_4.1  | -                    |
| GF0041153 | 0                   | 1                  | 0                 | 0 Hypothetical protein (1)                                 | -                                                                                                                                                                                                                                                                                                                                                                | -                                                                                                                                                                                                                                                                                                                                                                                                                                        | -                      | C_uni98_01513_mRNA_6.1  | -                    |
| GF0041152 | 0                   | 1                  | 0                 | 0 Hypothetical protein (1)                                 | protein binding [GO:0005515 molecular_function] (1)                                                                                                                                                                                                                                                                                                              | Leucine-rich repeat [IPR010161] (1); Leucine-rich repeat domain, L domain-like [IPR025075] (1)                                                                                                                                                                                                                                                                                                                                           | -                      | C_uni98_01513_mRNA_5.1  | -                    |
| GF0041151 | 0                   | 1                  | 0                 | 0 Hypothetical protein (1)                                 | -                                                                                                                                                                                                                                                                                                                                                                | -                                                                                                                                                                                                                                                                                                                                                                                                                                        | -                      | C_uni98_01513_mRNA_2.1  | -                    |
| GF0041150 | 0                   | 1                  | 0                 | 0 Hypothetical protein (1)                                 | nucleic acid binding [GO:0003676 molecular_function] (1)                                                                                                                                                                                                                                                                                                         | Ribonuclease H-like domain [IPR012337] (1)                                                                                                                                                                                                                                                                                                                                                                                               | -                      | C_uni98_01513_mRNA_1.1  | -                    |
| GF0041149 | 0                   | 1                  | 0                 | 0 Hypothetical protein (1)                                 | -                                                                                                                                                                                                                                                                                                                                                                | -                                                                                                                                                                                                                                                                                                                                                                                                                                        | -                      | C_uni98_01512_mRNA_1.1  | -                    |
| GF0041148 | 0                   | 1                  | 0                 | 0 Hypothetical protein (1)                                 | -                                                                                                                                                                                                                                                                                                                                                                | Domain of unknown function DUF4283 [IPR025558] (4)                                                                                                                                                                                                                                                                                                                                                                                       | -                      | C_uni98_01511_mRNA_4.1  | -                    |
| GF0041147 | 0                   | 1                  | 0                 | 0 Hypothetical protein (1)                                 | -                                                                                                                                                                                                                                                                                                                                                                | -                                                                                                                                                                                                                                                                                                                                                                                                                                        | -                      | C_uni98_01511_mRNA_16.1 | -                    |
| GF0041146 | 0                   | 1                  | 0                 | 0 Putative non-4-TR retroelement reverse transcriptase (1) | nucleic acid binding [GO:0003676 molecular_function] (1)                                                                                                                                                                                                                                                                                                         | Reverse transcriptase domain [IPR000477] (1); Reverse transcriptase zinc-binding domain [IPR029669] (1); Ribonuclease H-like domain [IPR012337] (1)                                                                                                                                                                                                                                                                                      | -                      | C_uni98_01511_mRNA_13.1 | -                    |
| GF0041145 | 0                   | 1                  | 0                 | 0 Hypothetical protein (1)                                 | -                                                                                                                                                                                                                                                                                                                                                                | -                                                                                                                                                                                                                                                                                                                                                                                                                                        | -                      | C_uni98_01511_mRNA_12.1 | -                    |
| GF0041144 | 0                   | 1                  | 0                 | 0 Hypothetical protein (1)                                 | -                                                                                                                                                                                                                                                                                                                                                                | -                                                                                                                                                                                                                                                                                                                                                                                                                                        | -                      | C_uni98_01511_mRNA_11.1 | -                    |
| GF0041143 | 0                   | 1                  | 0                 | 0 Ankyrin repeat family protein, putative (1)              | protein binding [GO:0005515 molecular_function] (1)                                                                                                                                                                                                                                                                                                              | Ankyrin repeat-containing domain [IPR020683] (1); Ankyrin repeat [IPR021101] (1)                                                                                                                                                                                                                                                                                                                                                         | -                      | C_uni98_01510_mRNA_6.1  | -                    |
| GF0041142 | 0                   | 1                  | 0                 | 0 Anaphase-promoting complex subunit 6 (1)                 | protein binding [GO:0005515 molecular_function] (1)                                                                                                                                                                                                                                                                                                              | Tetrapeptide-like helical domain [IPR011990] (4)                                                                                                                                                                                                                                                                                                                                                                                         | -                      | C_uni98_01510_mRNA_4.1  | -                    |
| GF0041141 | 0                   | 1                  | 0                 | 0 Hypothetical protein (1)                                 | -                                                                                                                                                                                                                                                                                                                                                                | -                                                                                                                                                                                                                                                                                                                                                                                                                                        | -                      | C_uni98_01510_mRNA_3.1  | -                    |
| GF0041140 | 0                   | 1                  | 0                 | 0 Hypothetical protein (1)                                 | -                                                                                                                                                                                                                                                                                                                                                                | -                                                                                                                                                                                                                                                                                                                                                                                                                                        | -                      | C_uni98_01510_mRNA_2.1  | -                    |
| GF0041139 | 0                   | 1                  | 0                 | 0 Hypothetical protein (1)                                 | -                                                                                                                                                                                                                                                                                                                                                                | -                                                                                                                                                                                                                                                                                                                                                                                                                                        | -                      | C_uni98_01510_mRNA_1.1  | -                    |
| GF0041138 | 0                   | 1                  | 0                 | 0 Hypothetical protein (1)                                 | -                                                                                                                                                                                                                                                                                                                                                                | -                                                                                                                                                                                                                                                                                                                                                                                                                                        | -                      | C_uni98_01509_mRNA_3.1  | -                    |
| GF0041137 | 0                   | 1                  | 0                 | 0 Hypothetical protein (1)                                 | -                                                                                                                                                                                                                                                                                                                                                                | -                                                                                                                                                                                                                                                                                                                                                                                                                                        | -                      | C_uni98_01508_mRNA_5.1  | -                    |
| GF0041136 | 0                   | 1                  | 0                 | 0 Hypothetical protein (1)                                 | -                                                                                                                                                                                                                                                                                                                                                                | -                                                                                                                                                                                                                                                                                                                                                                                                                                        | -                      | C_uni98_01508_mRNA_4.1  | -                    |
| GF0041135 | 0                   | 1                  | 0                 | 0 Hypothetical protein (1)                                 | -                                                                                                                                                                                                                                                                                                                                                                | -                                                                                                                                                                                                                                                                                                                                                                                                                                        | -                      | C_uni98_01508_mRNA_2.1  | -                    |
| GF0041134 | 0                   | 1                  | 0                 | 0 Hypothetical protein (1)                                 | -                                                                                                                                                                                                                                                                                                                                                                | FAR1 DNA binding domain [IPR004330] (1)                                                                                                                                                                                                                                                                                                                                                                                                  | -                      | C_uni98_01508_mRNA_10.1 | -                    |
| GF0041133 | 0                   | 1                  | 0                 | 0 Hypothetical protein (1)                                 | -                                                                                                                                                                                                                                                                                                                                                                | Retransposon gap domain [IPR005162] (1)                                                                                                                                                                                                                                                                                                                                                                                                  | -                      | C_uni98_01508_mRNA_1.1  | -                    |
| GF0041132 | 0                   | 1                  | 0                 | 0 Embryonic abundant protein-like (1)                      | methyltransferase activity [GO:0008168 molecular_function] (1); metabolic process [GO:0008152 biological_process] (1)                                                                                                                                                                                                                                            | S-adenosyl-4-methylthio-dependent methyltransferase [IPR029663] (1); Methyltransferase type 11 [IPR013216] (1)                                                                                                                                                                                                                                                                                                                           | -                      | C_uni98_01507_mRNA_6.1  | -                    |
| GF0041131 | 0                   | 1                  | 0                 | 0 Hypothetical protein (1)                                 | -                                                                                                                                                                                                                                                                                                                                                                | -                                                                                                                                                                                                                                                                                                                                                                                                                                        | -                      | C_uni98_01507_mRNA_4.1  | -                    |
| GF0041130 | 0                   | 1                  | 0                 | 0 Hypothetical protein (1)                                 | -                                                                                                                                                                                                                                                                                                                                                                | -                                                                                                                                                                                                                                                                                                                                                                                                                                        | -                      | C_uni98_01507_mRNA_3.1  | -                    |
| GF0041129 | 0                   | 1                  | 0                 | 0 Hypothetical protein (1)                                 | -                                                                                                                                                                                                                                                                                                                                                                | -                                                                                                                                                                                                                                                                                                                                                                                                                                        | -                      | C_uni98_01506_mRNA_5.1  | -                    |
| GF0041128 | 0                   | 1                  | 0                 | 0 Hypothetical protein (1)                                 | -                                                                                                                                                                                                                                                                                                                                                                | High mobility group box domain [IPR009711] (1)                                                                                                                                                                                                                                                                                                                                                                                           | -                      | C_uni98_01505_mRNA_2.1  | -                    |
| GF0041127 | 0                   | 1                  | 0                 | 0 Hypothetical protein (1)                                 | regulation of transcription, DNA-templated [GO:0003555 biological_process] (1)                                                                                                                                                                                                                                                                                   | FH3/FAR1 family [IPR031052] (1)                                                                                                                                                                                                                                                                                                                                                                                                          | -                      | C_uni98_01505_mRNA_1.1  | -                    |
| GF0041126 | 0                   | 1                  | 0                 | 0 Hypothetical protein (1)                                 | RNA-directed RNA polymerase activity [GO:0003968 molecular_function] (1)                                                                                                                                                                                                                                                                                         | RNA-dependent RNA polymerase, eukaryotic-type [IPR007855] (1)                                                                                                                                                                                                                                                                                                                                                                            | -                      | C_uni98_01504_mRNA_2.1  | -                    |
| GF0041125 | 0                   | 1                  | 0                 | 0 Hypothetical protein (1)                                 | -                                                                                                                                                                                                                                                                                                                                                                | -                                                                                                                                                                                                                                                                                                                                                                                                                                        | -                      | C_uni98_01504_mRNA_1.1  | -                    |
| GF0041124 | 0                   | 1                  | 0                 | 0 Hypothetical protein (1)                                 | -                                                                                                                                                                                                                                                                                                                                                                | -                                                                                                                                                                                                                                                                                                                                                                                                                                        | -                      | C_uni98_01503_mRNA_8.1  | -                    |
| GF0041123 | 0                   | 1                  | 0                 | 0 Hypothetical protein (1)                                 | -                                                                                                                                                                                                                                                                                                                                                                | -                                                                                                                                                                                                                                                                                                                                                                                                                                        | -                      | C_uni98_01503_mRNA_5.1  | -                    |
| GF0041122 | 0                   | 1                  | 0                 | 0 Hypothetical protein (1)                                 | phosphotransferase activity, alcohol group as acceptor [GO:0016773 molecular_function] (1)                                                                                                                                                                                                                                                                       | Carbohydrate kinase P4b [IPR011611] (1); Carbohydrate kinase, P4b, conserved site [IPR021731] (1); Ribokase-like [IPR029056] (1)                                                                                                                                                                                                                                                                                                         | -                      | C_uni98_01503_mRNA_4.1  | -                    |
| GF0041121 | 0                   | 1                  | 0                 | 0 Hypothetical protein (1)                                 | -                                                                                                                                                                                                                                                                                                                                                                | -                                                                                                                                                                                                                                                                                                                                                                                                                                        | -                      | C_uni98_01503_mRNA_3.1  | -                    |
| GF0041120 | 0                   | 1                  | 0                 | 0 Hypothetical protein (1)                                 | -                                                                                                                                                                                                                                                                                                                                                                | -                                                                                                                                                                                                                                                                                                                                                                                                                                        | -                      | C_uni98_01503_mRNA_2.1  | -                    |
| GF0041119 | 0                   | 1                  | 0                 | 0 Hypothetical protein (1)                                 | -                                                                                                                                                                                                                                                                                                                                                                | -                                                                                                                                                                                                                                                                                                                                                                                                                                        | -                      | C_uni98_01502_mRNA_5.1  | -                    |
| GF0041118 | 0                   | 1                  | 0                 | 0 Cytosine protease inhibitor (1)                          | -                                                                                                                                                                                                                                                                                                                                                                | -                                                                                                                                                                                                                                                                                                                                                                                                                                        | -                      | C_uni98_01502_mRNA_1.1  | -                    |
| GF0041117 | 0                   | 1                  | 0                 | 0 Hypothetical protein (1)                                 | carbohydrate metabolic process [GO:0005979 biological_process] (1); zinc ion binding [GO:0008270 molecular_function] (1); polygalacturonase activity [GO:0004650 molecular_function] (1); nucleic acid binding [GO:0003676 molecular_function] (1)                                                                                                               | Photosynthesis system II assembly factor Yc5836/16-like domain [IPR028203] (1); Glycosyl hydrolase, family 28 [IPR000743] (1); Pectin lyase 6d [IPR012334] (1); Zinc finger, CCHC-type [IPR01878] (1); Pectin lyase fold/vulnulence factor [IPR011050] (1)                                                                                                                                                                               | -                      | C_uni98_01500_mRNA_4.1  | -                    |
| GF0041116 | 0                   | 1                  | 0                 | 0 Hypothetical protein (1)                                 | -                                                                                                                                                                                                                                                                                                                                                                | -                                                                                                                                                                                                                                                                                                                                                                                                                                        | -                      | C_uni98_01499_mRNA_4.1  | -                    |
| GF0041115 | 0                   | 1                  | 0                 | 0 Hypothetical protein (1)                                 | -                                                                                                                                                                                                                                                                                                                                                                | -                                                                                                                                                                                                                                                                                                                                                                                                                                        | -                      | C_uni98_01498_mRNA_9.1  | -                    |
| GF0041114 | 0                   | 1                  | 0                 | 0 Hypothetical protein (1)                                 | -                                                                                                                                                                                                                                                                                                                                                                | -                                                                                                                                                                                                                                                                                                                                                                                                                                        | -                      | C_uni98_01498_mRNA_8.1  | -                    |
| GF0041113 | 0                   | 1                  | 0                 | 0 Hypothetical protein (1)                                 | -                                                                                                                                                                                                                                                                                                                                                                | -                                                                                                                                                                                                                                                                                                                                                                                                                                        | -                      | C_uni98_01498_mRNA_7.1  | -                    |
| GF0041112 | 0                   | 1                  | 0                 | 0 Hypothetical protein (1)                                 | -                                                                                                                                                                                                                                                                                                                                                                | -                                                                                                                                                                                                                                                                                                                                                                                                                                        | -                      | C_uni98_01498_mRNA_6.1  | -                    |
| GF0041111 | 0                   | 1                  | 0                 | 0 Hypothetical protein (1)                                 | -                                                                                                                                                                                                                                                                                                                                                                | -                                                                                                                                                                                                                                                                                                                                                                                                                                        | -                      | C_uni98_01498_mRNA_5.1  | -                    |
| GF0041110 | 0                   | 1                  | 0                 | 0 Hypothetical protein (1)                                 | -                                                                                                                                                                                                                                                                                                                                                                | -                                                                                                                                                                                                                                                                                                                                                                                                                                        | -                      | C_uni98_01498_mRNA_10.1 | -                    |
| GF0041109 | 0                   | 1                  | 0                 | 0 Hypothetical protein (1)                                 | -                                                                                                                                                                                                                                                                                                                                                                | -                                                                                                                                                                                                                                                                                                                                                                                                                                        | -                      | C_uni98_01498_mRNA_1.1  | -                    |
| GF0041108 | 0                   | 1                  | 0                 | 0 Hypothetical protein (1)                                 | protein phosphorylation [GO:0006468 biological_process] (1); protein kinase activity [GO:0004672 molecular_function] (1); ATP binding [GO:0005524 molecular_function] (1)                                                                                                                                                                                        | Sarasin/threonine-protein kinase, active site [IPR002711] (1); Serine/threonine/tyrosine-specific protein kinase, catalytic domain [IPR002290] (1); LysM domain [IPR018252] (1); Protein kinase domain [IPR000719] (1); Protein kinase-like domain [IPR01009] (1)                                                                                                                                                                        | -                      | C_uni98_01497_mRNA_7.1  | -                    |
| GF0041107 | 0                   | 1                  | 0                 | 0 Hypothetical protein (1)                                 | membrane [GO:0016020 cellular_component] (1)                                                                                                                                                                                                                                                                                                                     | Calcium-dependent channel, 7TM region, pentameric phosphatase [IPR018641] (1); Calcium permeable stress-gated cation channel, L-terminal transmembrane domain [IPR025280] (1); Calcium-dependent channel, 7TM region, putative phosphatase [IPR030661] (1)                                                                                                                                                                               | -                      | C_uni98_01495_mRNA_8.1  | -                    |
| GF0041106 | 0                   | 1                  | 0                 | 0 Hyperosmolarity-gated Ca2+ permeable channel (1)         | membrane [GO:0016020 cellular_component] (1)                                                                                                                                                                                                                                                                                                                     | Calcium-dependent channel, 7TM region, putative phosphatase [IPR030661] (1); Leucine-rich repeat domain, L domain-like [IPR022675] (1)                                                                                                                                                                                                                                                                                                   | -                      | C_uni98_01495_mRNA_6.1  | -                    |
| GF0041105 | 0                   | 1                  | 0                 | 0 Hypothetical protein (1)                                 | -                                                                                                                                                                                                                                                                                                                                                                | -                                                                                                                                                                                                                                                                                                                                                                                                                                        | -                      | C_uni98_01494_mRNA_3.1  | -                    |
| GF0041104 | 0                   | 1                  | 0                 | 0 Hypothetical protein (1)                                 | -                                                                                                                                                                                                                                                                                                                                                                | -                                                                                                                                                                                                                                                                                                                                                                                                                                        | -                      | C_uni98_01494_mRNA_2.1  | -                    |
| GF0041103 | 0                   | 1                  | 0                 | 0 Hypothetical protein (1)                                 | transcription from RNA polymerase II promoter [GO:0006366 biological_process] (1); DNA-directed RNA polymerase activity [GO:0003899 molecular_function] (1); DNA binding [GO:0003677 molecular_function] (1); transcription, DNA-templated [GO:0006351 biological_process] (1); DNA-directed RNA polymerase II, core complex [GO:0005565 cellular_component] (1) | RNA polymerase Rpb1, domain 1 [IPR007000] (1); RNA polymerase Rpb1, domain 2 [IPR007081] (1); RNA polymerase Rpb1, domain 7 [IPR007073] (1); RNA polymerase II, heteropolymetric repeat, eukaryotic [IPR000684] (1)                                                                                                                                                                                                                      | -                      | C_uni98_01493_mRNA_9.1  | -                    |
| GF0041102 | 0                   | 1                  | 0                 | 0 Hypothetical protein (1)                                 | -                                                                                                                                                                                                                                                                                                                                                                | -                                                                                                                                                                                                                                                                                                                                                                                                                                        | -                      | C_uni98_01492_mRNA_6.1  | -                    |
| GF0041101 | 0                   | 1                  | 0                 | 0 Hypothetical protein (1)                                 | zinc ion binding [GO:0008270 molecular_function] (1); nucleic acid binding [GO:0003676 molecular_function] (1)                                                                                                                                                                                                                                                   | Zinc finger, CCHC-type [IPR01878] (1)                                                                                                                                                                                                                                                                                                                                                                                                    | -                      | C_uni98_01492_mRNA_2.1  | -                    |
| GF0041100 | 0                   | 1                  | 0                 | 0 Putative transcriptional regulator D3-1 (1)              | -                                                                                                                                                                                                                                                                                                                                                                | Class I glutamine amidotransferase-like [IPR029621] (1); D3-1 [IPR006287] (1); D3-1 Pfp [IPR002818] (1)                                                                                                                                                                                                                                                                                                                                  | -                      | C_uni98_01491_mRNA_7.1  | -                    |
| GF0041099 | 0                   | 1                  | 0                 | 0 Hypothetical protein (1)                                 | -                                                                                                                                                                                                                                                                                                                                                                | Class I glutamine amidotransferase-like [IPR029621] (1); D3-1 Pfp [IPR002818] (1)                                                                                                                                                                                                                                                                                                                                                        | -                      | C_uni98_01491_mRNA_6.1  | -                    |
| GF0041098 | 0                   | 1                  | 0                 | 0 Receptor like protein 33 (1)                             | protein binding [GO:0005515 molecular_function] (1)                                                                                                                                                                                                                                                                                                              | Leucine-rich repeat, typical subtype [IPR003911] (1); Leucine-rich repeat domain, L domain-like [IPR022675] (1); Leucine-rich repeat [IPR010161] (1); Leucine-rich repeat-containing N-terminal, plant-type [IPR013210] (1)                                                                                                                                                                                                              | -                      | C_uni98_01491_mRNA_5.1  | -                    |
| GF0041097 | 0                   | 1                  | 0                 | 0 Putative transcriptional regulator D3-1 (1)              | -                                                                                                                                                                                                                                                                                                                                                                | Class I glutamine amidotransferase-like [IPR029621] (1); D3-1 [IPR006287] (1); D3-1 Pfp [IPR002818] (1)                                                                                                                                                                                                                                                                                                                                  | -                      | C_uni98_01491_mRNA_10.1 | -                    |
| GF0041096 | 0                   | 1                  | 0                 | 0 Hypothetical protein (1)                                 | -                                                                                                                                                                                                                                                                                                                                                                | -                                                                                                                                                                                                                                                                                                                                                                                                                                        | -                      | C_uni98_01490_mRNA_4.1  | -                    |
| GF0041095 | 0                   | 1                  | 0                 | 0 Ubiquitin thioesterase OTU1 (1)                          | -                                                                                                                                                                                                                                                                                                                                                                | -                                                                                                                                                                                                                                                                                                                                                                                                                                        | -                      | C_uni98_01490_mRNA_3.1  | -                    |
| GF0041094 | 0                   | 1                  | 0                 | 0 Hypothetical protein (1)                                 | -                                                                                                                                                                                                                                                                                                                                                                | -                                                                                                                                                                                                                                                                                                                                                                                                                                        | -                      | C_uni98_01490_mRNA_2.1  | -                    |
| GF0041093 | 0                   | 1                  | 0                 | 0 Hypothetical protein (1)                                 | protein binding [GO:0005515 molecular_function] (1)                                                                                                                                                                                                                                                                                                              | TRAF-like [IPR008974] (1); MATH1/TRAF domain [IPR020883] (1); MATH1/TRAF domain [IPR020883] (1); TRAF-like [IPR008974] (1)                                                                                                                                                                                                                                                                                                               | -                      | C_uni98_01489_mRNA_3.1  | -                    |
| GF0041092 | 0                   | 1                  | 0                 | 0 Hypothetical protein (1)                                 | protein binding [GO:0005515 molecular_function] (1)                                                                                                                                                                                                                                                                                                              | -                                                                                                                                                                                                                                                                                                                                                                                                                                        | -                      | C_uni98_01489_mRNA_1.1  | -                    |
| GF0041091 | 0                   | 1                  | 0                 | 0 Hypothetical protein (1)                                 | catalytic activity [GO:0003824 molecular_function] (1)                                                                                                                                                                                                                                                                                                           | Pyridoxal phosphate-dependent transferase [IPR015424] (1); Pyridoxal phosphate-dependent transferase, major region, subdomain 1 [IPR015421] (1); Amidotransferase, class I/classII [IPR04839] (1); Pyridoxal phosphate-dependent transferase, major region, subdomain 1 [IPR015421] (1); Pyridoxal phosphate-dependent transferase [IPR015424] (1); Pyridoxal phosphate-dependent transferase, major region, subdomain 2 [IPR015422] (1) | -                      | C_uni98_01488_mRNA_8.1  | -                    |
| GF0041090 | 0                   | 1                  | 0                 | 0 Hypothetical protein (1)                                 | biosynthetic process [GO:0009058 biological_process] (1); catalytic activity [GO:0003824 molecular_function] (1); pyridoxal phosphate binding [GO:0030170 molecular_function] (1)                                                                                                                                                                                | Phosphoribosylglycylamide synthetase, ATP-grasp (A) domain [IPR020561] (1); ATP-grasp fold, subdomain 2 [IPR013611] (1); Tetrapeptide-like helical domain [IPR011990] (4)                                                                                                                                                                                                                                                                | -                      | C_uni98_01488_mRNA_7.1  | -                    |
| GF0041089 | 0                   | 1                  | 0                 | 0 Hypothetical protein (1)                                 | ATP binding [GO:0005524 molecular_function] (1)                                                                                                                                                                                                                                                                                                                  | -                                                                                                                                                                                                                                                                                                                                                                                                                                        | -                      | C_uni98_01488_mRNA_4.1  | -                    |
| GF0041088 | 0                   | 1                  | 0                 | 0 Hypothetical protein (1)                                 | protein binding [GO:0005515 molecular_function] (1)                                                                                                                                                                                                                                                                                                              | -                                                                                                                                                                                                                                                                                                                                                                                                                                        | -                      | C_uni98_01488_mRNA_3.1  | -                    |
| GF0041087 | 0                   | 1                  | 0                 | 0 Hypothetical protein (1)                                 | -                                                                                                                                                                                                                                                                                                                                                                | -                                                                                                                                                                                                                                                                                                                                                                                                                                        | -                      | C_uni98_01488_mRNA_1.1  | -                    |
| GF0041086 | 0                   | 1                  | 0                 | 0 Hypothetical protein (1)                                 | -                                                                                                                                                                                                                                                                                                                                                                | -                                                                                                                                                                                                                                                                                                                                                                                                                                        | -                      | C_uni98_01487_mRNA_8.1  | -                    |
| GF0041085 | 0                   | 1                  | 0                 | 0 Hypothetical protein (1)                                 | -                                                                                                                                                                                                                                                                                                                                                                | -                                                                                                                                                                                                                                                                                                                                                                                                                                        | -                      | C_uni98_01487_mRNA_7.1  | -                    |
| GF0041084 | 0                   | 1                  | 0                 | 0 Hypothetical protein (1)                                 | -                                                                                                                                                                                                                                                                                                                                                                | -                                                                                                                                                                                                                                                                                                                                                                                                                                        | -                      | C_uni98_01486_mRNA_8.1  | -                    |
| GF0041083 | 0                   | 1                  | 0                 | 0 Hypothetical protein (1)                                 | -                                                                                                                                                                                                                                                                                                                                                                | -                                                                                                                                                                                                                                                                                                                                                                                                                                        | -                      | C_uni98_01486_mRNA_7.1  | -                    |
| GF0041082 | 0                   | 1                  | 0                 | 0 Hypothetical protein (1)                                 | -                                                                                                                                                                                                                                                                                                                                                                | -                                                                                                                                                                                                                                                                                                                                                                                                                                        | -                      | C_uni98_01486_mRNA_4.1  | -                    |
| GF0041081 | 0                   | 1                  | 0                 | 0 Hypothetical protein (1)                                 | -                                                                                                                                                                                                                                                                                                                                                                | -                                                                                                                                                                                                                                                                                                                                                                                                                                        | -                      | C_uni98_01486_mRNA_3.1  | -                    |



| ID        | Num. in C. crottensteini | Num. in C. auris | Num. in P. putida | Name                                  | GO                                                                                                                                                                                                                                                                                                                 | InterPro                                                                                                                                                                               | Members in C. crottensteini                                                                  | Members in C. auris     | Members in P. putida |
|-----------|--------------------------|------------------|-------------------|---------------------------------------|--------------------------------------------------------------------------------------------------------------------------------------------------------------------------------------------------------------------------------------------------------------------------------------------------------------------|----------------------------------------------------------------------------------------------------------------------------------------------------------------------------------------|----------------------------------------------------------------------------------------------|-------------------------|----------------------|
| GF0041080 | 0                        | 1                | 0                 | Hypothetical protein (1)              | proteolysis [GO:0006508]<br>biological process (1); aspartic-type endopeptidase activity [GO:0004190 molecular_function] (1)                                                                                                                                                                                       | Peptidase A2A, retrovirus, catalytic [IPR001995] (1)                                                                                                                                   | -                                                                                            | C_ushii_01486_mRNA_14.1 | -                    |
| GF0041079 | 0                        | 1                | 0                 | Hypothetical protein (1)              | -                                                                                                                                                                                                                                                                                                                  | -                                                                                                                                                                                      | -                                                                                            | C_ushii_01486_mRNA_12.1 | -                    |
| GF0041078 | 0                        | 1                | 0                 | Hypothetical protein (1)              | zinc ion binding [GO:0008270 molecular_function] (1); nucleic acid binding [GO:0003676 molecular_function] (1)                                                                                                                                                                                                     | Zinc finger, CCHC-type [IPR001878] (1)                                                                                                                                                 | -                                                                                            | C_ushii_01486_mRNA_11.1 | -                    |
| GF0041077 | 0                        | 1                | 0                 | Hypothetical protein (1)              | -                                                                                                                                                                                                                                                                                                                  | Dual domain, conserved site [IPR019253] (1); Dual domain [IPR001621] (1); Class I glutamine amidotransferase-like [IPR029062] (4)                                                      | -                                                                                            | C_ushii_01485_mRNA_4.1  | -                    |
| GF0041076 | 0                        | 1                | 0                 | Hypothetical protein (1)              | -                                                                                                                                                                                                                                                                                                                  | -                                                                                                                                                                                      | -                                                                                            | C_ushii_01485_mRNA_3.1  | -                    |
| GF0041075 | 0                        | 1                | 0                 | Hypothetical protein (1)              | -                                                                                                                                                                                                                                                                                                                  | -                                                                                                                                                                                      | -                                                                                            | C_ushii_01484_mRNA_3.1  | -                    |
| GF0041074 | 0                        | 1                | 0                 | Hypothetical protein (1)              | -                                                                                                                                                                                                                                                                                                                  | -                                                                                                                                                                                      | -                                                                                            | C_ushii_01482_mRNA_7.1  | -                    |
| GF0041073 | 0                        | 1                | 0                 | Hypothetical protein (1)              | -                                                                                                                                                                                                                                                                                                                  | Vps3-like, N-terminal [IPR007234] (1)                                                                                                                                                  | -                                                                                            | C_ushii_01482_mRNA_6.1  | -                    |
| GF0041072 | 0                        | 1                | 0                 | Hypothetical protein (1)              | -                                                                                                                                                                                                                                                                                                                  | -                                                                                                                                                                                      | -                                                                                            | C_ushii_01482_mRNA_4.1  | -                    |
| GF0041071 | 0                        | 1                | 0                 | Hypothetical protein (1)              | -                                                                                                                                                                                                                                                                                                                  | -                                                                                                                                                                                      | -                                                                                            | C_ushii_01482_mRNA_2.1  | -                    |
| GF0041070 | 0                        | 1                | 0                 | Hypothetical protein (1)              | -                                                                                                                                                                                                                                                                                                                  | -                                                                                                                                                                                      | -                                                                                            | C_ushii_01481_mRNA_4.1  | -                    |
| GF0041069 | 0                        | 1                | 0                 | Hypothetical protein (1)              | -                                                                                                                                                                                                                                                                                                                  | -                                                                                                                                                                                      | -                                                                                            | C_ushii_01481_mRNA_3.1  | -                    |
| GF0041068 | 0                        | 1                | 0                 | Hypothetical protein (1)              | -                                                                                                                                                                                                                                                                                                                  | -                                                                                                                                                                                      | -                                                                                            | C_ushii_01480_mRNA_9.1  | -                    |
| GF0041067 | 0                        | 1                | 0                 | Hypothetical protein (1)              | NBS-LRR type disease resistance protein ADP binding [GO:0043531 molecular_function] (1)                                                                                                                                                                                                                            | NB-ARC [IPR002182] (1); P-loop containing nucleoside triphosphate hydrolase [IPR027417] (1)                                                                                            | -                                                                                            | C_ushii_01480_mRNA_8.1  | -                    |
| GF0041066 | 0                        | 1                | 0                 | Hypothetical protein (1)              | -                                                                                                                                                                                                                                                                                                                  | -                                                                                                                                                                                      | -                                                                                            | C_ushii_01480_mRNA_10.1 | -                    |
| GF0041065 | 0                        | 1                | 0                 | Hypothetical protein (1)              | 2-oxoisovalerate dehydrogenase subunit alpha, mitochondrial (1)                                                                                                                                                                                                                                                    | oxidoreductase activity, acting on the aldehyde or one group of donors, NAD(P)+ as acceptor [GO:0016624 molecular_function] (1); metabolic process [GO:0008152 biological_process] (1) | Dihydrogenase, E1 component [IPR01017] (1); Thiamin diphosphate-binding fold [IPR029061] (1) | C_ushii_01479_mRNA_5.1  | -                    |
| GF0041064 | 0                        | 1                | 0                 | Hypothetical protein (1)              | protein dimerization activity [GO:0046983 molecular_function] (1); nucleic acid binding [GO:0003676 molecular_function] (1)                                                                                                                                                                                        | Ribonuclease H-like domain [IPR012337] (1); HAT, C-terminal dimerization domain [IPR008906] (4)                                                                                        | -                                                                                            | C_ushii_01479_mRNA_4.1  | -                    |
| GF0041063 | 0                        | 1                | 0                 | Hypothetical protein (1)              | -                                                                                                                                                                                                                                                                                                                  | Retrotransposon gag domain [IPR005162] (4)                                                                                                                                             | -                                                                                            | C_ushii_01478_mRNA_8.1  | -                    |
| GF0041062 | 0                        | 1                | 0                 | Hypothetical protein (1)              | -                                                                                                                                                                                                                                                                                                                  | -                                                                                                                                                                                      | -                                                                                            | C_ushii_01478_mRNA_7.1  | -                    |
| GF0041061 | 0                        | 1                | 0                 | Hypothetical protein (1)              | -                                                                                                                                                                                                                                                                                                                  | Pentatricopeptide repeat [IPR002885] (1)                                                                                                                                               | -                                                                                            | C_ushii_01478_mRNA_4.1  | -                    |
| GF0041060 | 0                        | 1                | 0                 | Hypothetical protein (1)              | -                                                                                                                                                                                                                                                                                                                  | -                                                                                                                                                                                      | -                                                                                            | C_ushii_01478_mRNA_2.1  | -                    |
| GF0041059 | 0                        | 1                | 0                 | Hypothetical protein (1)              | Pentatricopeptide repeat (PPR) repeat protein (1)                                                                                                                                                                                                                                                                  | Pentatricopeptide repeat [IPR002885] (4)                                                                                                                                               | -                                                                                            | C_ushii_01478_mRNA_12.1 | -                    |
| GF0041058 | 0                        | 1                | 0                 | Hypothetical protein (1)              | Positive pentatricopeptide repeat-containing protein, mitochondrial (1)                                                                                                                                                                                                                                            | -                                                                                                                                                                                      | -                                                                                            | C_ushii_01478_mRNA_11.1 | -                    |
| GF0041057 | 0                        | 1                | 0                 | Hypothetical protein (1)              | -                                                                                                                                                                                                                                                                                                                  | Pentatricopeptide repeat [IPR002885] (4)                                                                                                                                               | -                                                                                            | C_ushii_01478_mRNA_10.1 | -                    |
| GF0041056 | 0                        | 1                | 0                 | Hypothetical protein (1)              | -                                                                                                                                                                                                                                                                                                                  | -                                                                                                                                                                                      | -                                                                                            | C_ushii_01478_mRNA_1.1  | -                    |
| GF0041055 | 0                        | 1                | 0                 | Hypothetical protein (1)              | -                                                                                                                                                                                                                                                                                                                  | LOG family [IPR013100] (1)                                                                                                                                                             | -                                                                                            | C_ushii_01477_mRNA_3.1  | -                    |
| GF0041054 | 0                        | 1                | 0                 | Hypothetical protein (1)              | -                                                                                                                                                                                                                                                                                                                  | -                                                                                                                                                                                      | -                                                                                            | C_ushii_01477_mRNA_2.1  | -                    |
| GF0041053 | 0                        | 1                | 0                 | Hypothetical protein (1)              | transcription, DNA-templated [GO:0006261 biological_process] (1); DNA binding [GO:0003677 molecular_function] (1); DNA-directed RNA polymerase activity [GO:0003899 molecular_function] (1)                                                                                                                        | DNA-directed RNA polymerase, phage-type [IPR029092] (1)                                                                                                                                | -                                                                                            | C_ushii_01476_mRNA_6.1  | -                    |
| GF0041052 | 0                        | 1                | 0                 | Hypothetical protein (1)              | -                                                                                                                                                                                                                                                                                                                  | -                                                                                                                                                                                      | -                                                                                            | C_ushii_01476_mRNA_5.1  | -                    |
| GF0041051 | 0                        | 1                | 0                 | Hypothetical protein (1)              | heme-copper terminal oxidase activity [GO:0015902 molecular_function] (1); methanase [GO:0016020 cellular_component] (1)                                                                                                                                                                                           | Cytochrome c oxidase subunit III domain [IPR000298] (1)                                                                                                                                | -                                                                                            | C_ushii_01476_mRNA_4.1  | -                    |
| GF0041050 | 0                        | 1                | 0                 | Hypothetical protein (1)              | -                                                                                                                                                                                                                                                                                                                  | -                                                                                                                                                                                      | -                                                                                            | C_ushii_01476_mRNA_2.1  | -                    |
| GF0041049 | 0                        | 1                | 0                 | Hypothetical protein (1)              | -                                                                                                                                                                                                                                                                                                                  | -                                                                                                                                                                                      | -                                                                                            | C_ushii_01476_mRNA_1.1  | -                    |
| GF0041048 | 0                        | 1                | 0                 | Hypothetical protein (1)              | -                                                                                                                                                                                                                                                                                                                  | -                                                                                                                                                                                      | -                                                                                            | C_ushii_01475_mRNA_8.1  | -                    |
| GF0041047 | 0                        | 1                | 0                 | Hypothetical protein (1)              | -                                                                                                                                                                                                                                                                                                                  | Prolamin-like domain [IPR008502] (1)                                                                                                                                                   | -                                                                                            | C_ushii_01475_mRNA_3.1  | -                    |
| GF0041046 | 0                        | 1                | 0                 | Hypothetical protein (1)              | Receptor like protein 27 (1)                                                                                                                                                                                                                                                                                       | Leucine-rich repeat domain, I domain-like [IPR012675] (1)                                                                                                                              | -                                                                                            | C_ushii_01475_mRNA_2.1  | -                    |
| GF0041045 | 0                        | 1                | 0                 | Hypothetical protein (1)              | -                                                                                                                                                                                                                                                                                                                  | -                                                                                                                                                                                      | -                                                                                            | C_ushii_01473_mRNA_8.1  | -                    |
| GF0041044 | 0                        | 1                | 0                 | Hypothetical protein (1)              | -                                                                                                                                                                                                                                                                                                                  | -                                                                                                                                                                                      | -                                                                                            | C_ushii_01473_mRNA_6.1  | -                    |
| GF0041043 | 0                        | 1                | 0                 | Hypothetical protein (1)              | -                                                                                                                                                                                                                                                                                                                  | -                                                                                                                                                                                      | -                                                                                            | C_ushii_01473_mRNA_5.1  | -                    |
| GF0041042 | 0                        | 1                | 0                 | Hypothetical protein (1)              | -                                                                                                                                                                                                                                                                                                                  | -                                                                                                                                                                                      | -                                                                                            | C_ushii_01473_mRNA_4.1  | -                    |
| GF0041041 | 0                        | 1                | 0                 | Hypothetical protein (1)              | -                                                                                                                                                                                                                                                                                                                  | Domain of unknown function DUF1985 [IPR015410] (1)                                                                                                                                     | -                                                                                            | C_ushii_01473_mRNA_2.1  | -                    |
| GF0041040 | 0                        | 1                | 0                 | Hypothetical protein (1)              | nucleoside-containing compound metabolic process [GO:0006139 biological_process] (1); 3'-5' exonuclease activity [GO:0008408 molecular_function] (1); nucleic acid binding [GO:0003676 molecular_function] (1)                                                                                                     | Ribonuclease H-like domain [IPR012337] (1); 3'-5' exonuclease domain [IPR002562] (1)                                                                                                   | -                                                                                            | C_ushii_01472_mRNA_7.1  | -                    |
| GF0041039 | 0                        | 1                | 0                 | HD subdomain, putative isoform 7 (1)  | -                                                                                                                                                                                                                                                                                                                  | PvuGppA phosphatase [IPR003695] (1)                                                                                                                                                    | -                                                                                            | C_ushii_01472_mRNA_6.1  | -                    |
| GF0041038 | 0                        | 1                | 0                 | Hypothetical protein (1)              | -                                                                                                                                                                                                                                                                                                                  | -                                                                                                                                                                                      | -                                                                                            | C_ushii_01472_mRNA_2.1  | -                    |
| GF0041037 | 0                        | 1                | 0                 | Hypothetical protein (1)              | -                                                                                                                                                                                                                                                                                                                  | -                                                                                                                                                                                      | -                                                                                            | C_ushii_01472_mRNA_1.1  | -                    |
| GF0041036 | 0                        | 1                | 0                 | Hypothetical protein (1)              | pseudouridine synthase activity [GO:0009092 molecular_function] (1); RNA modification [GO:0009451 biological_process] (1); RNA binding [GO:0003732 molecular_function] (1); pseudouridine synthase [GO:0001522 biological_process] (1)                                                                             | Pseudouridine synthase I, TruA [IPR001406] (1); Pseudouridine synthase I, TruA, C-terminal [IPR000995] (1)                                                                             | -                                                                                            | C_ushii_01471_mRNA_3.1  | -                    |
| GF0041035 | 0                        | 1                | 0                 | Hypothetical protein (1)              | -                                                                                                                                                                                                                                                                                                                  | -                                                                                                                                                                                      | -                                                                                            | C_ushii_01470_mRNA_4.1  | -                    |
| GF0041034 | 0                        | 1                | 0                 | Hypothetical protein (1)              | -                                                                                                                                                                                                                                                                                                                  | -                                                                                                                                                                                      | -                                                                                            | C_ushii_01469_mRNA_6.1  | -                    |
| GF0041033 | 0                        | 1                | 0                 | Cytochrome P450 family 71 protein (1) | iron ion binding [GO:0005506 molecular_function] (1); heme binding [GO:0002037 molecular_function] (1); oxidation-reduction process [GO:0005114 biological_process] (1); oxidoreductase activity, acting on paired donors, with incorporation or reduction of molecular oxygen [GO:0016765 molecular_function] (1) | Cytochrome P450 [IPR001128] (1)                                                                                                                                                        | -                                                                                            | C_ushii_01469_mRNA_5.1  | -                    |
| GF0041032 | 0                        | 1                | 0                 | Hypothetical protein (1)              | oxidation-reduction process [GO:0005114 biological_process] (1); oxidoreductase activity, acting on paired donors, with incorporation or reduction of molecular oxygen [GO:0016765 molecular_function] (1); heme binding [GO:0002037 molecular_function] (1); iron ion binding [GO:0005506 molecular_function] (1) | Cytochrome P450 [IPR001128] (1)                                                                                                                                                        | -                                                                                            | C_ushii_01469_mRNA_4.1  | -                    |
| GF0041031 | 0                        | 1                | 0                 | Hypothetical protein (1)              | -                                                                                                                                                                                                                                                                                                                  | -                                                                                                                                                                                      | -                                                                                            | C_ushii_01466_mRNA_6.1  | -                    |
| GF0041030 | 0                        | 1                | 0                 | Hypothetical protein (1)              | -                                                                                                                                                                                                                                                                                                                  | -                                                                                                                                                                                      | -                                                                                            | C_ushii_01466_mRNA_3.1  | -                    |
| GF0041029 | 0                        | 1                | 0                 | Hypothetical protein (1)              | -                                                                                                                                                                                                                                                                                                                  | -                                                                                                                                                                                      | -                                                                                            | C_ushii_01466_mRNA_2.1  | -                    |
| GF0041028 | 0                        | 1                | 0                 | Hypothetical protein (1)              | -                                                                                                                                                                                                                                                                                                                  | -                                                                                                                                                                                      | -                                                                                            | C_ushii_01466_mRNA_1.1  | -                    |
| GF0041027 | 0                        | 1                | 0                 | Hypothetical protein (1)              | -                                                                                                                                                                                                                                                                                                                  | -                                                                                                                                                                                      | -                                                                                            | C_ushii_01465_mRNA_3.1  | -                    |
| GF0041026 | 0                        | 1                | 0                 | Hypothetical protein (1)              | nucleic acid binding [GO:0003676 molecular_function] (1); zinc ion binding [GO:0005506 molecular_function] (1)                                                                                                                                                                                                     | Zinc finger, CCHC-type [IPR001878] (1)                                                                                                                                                 | -                                                                                            | C_ushii_01465_mRNA_2.1  | -                    |
| GF0041025 | 0                        | 1                | 0                 | Hypothetical protein (1)              | -                                                                                                                                                                                                                                                                                                                  | -                                                                                                                                                                                      | -                                                                                            | C_ushii_01465_mRNA_1.1  | -                    |
| GF0041024 | 0                        | 1                | 0                 | Hypothetical protein (1)              | -                                                                                                                                                                                                                                                                                                                  | -                                                                                                                                                                                      | -                                                                                            | C_ushii_01463_mRNA_8.1  | -                    |
| GF0041023 | 0                        | 1                | 0                 | Hypothetical protein (1)              | -                                                                                                                                                                                                                                                                                                                  | -                                                                                                                                                                                      | -                                                                                            | C_ushii_01463_mRNA_6.1  | -                    |
| GF0041022 | 0                        | 1                | 0                 | Hypothetical protein (1)              | -                                                                                                                                                                                                                                                                                                                  | -                                                                                                                                                                                      | -                                                                                            | C_ushii_01463_mRNA_5.1  | -                    |
| GF0041021 | 0                        | 1                | 0                 | Hypothetical protein (1)              | regulation of transcription, DNA-templated [GO:0006355 biological_process] (1); DNA binding [GO:0003677 molecular_function] (1)                                                                                                                                                                                    | NAC domain [IPR003441] (1)                                                                                                                                                             | -                                                                                            | C_ushii_01463_mRNA_12.1 | -                    |
| GF0041020 | 0                        | 1                | 0                 | Hypothetical protein (1)              | -                                                                                                                                                                                                                                                                                                                  | -                                                                                                                                                                                      | -                                                                                            | C_ushii_01463_mRNA_11.1 | -                    |
| GF0041019 | 0                        | 1                | 0                 | Hypothetical protein (1)              | -                                                                                                                                                                                                                                                                                                                  | -                                                                                                                                                                                      | -                                                                                            | C_ushii_01463_mRNA_1.1  | -                    |
| GF0041018 | 0                        | 1                | 0                 | Hypothetical protein (1)              | protein dimerization activity [GO:0046983 molecular_function] (1); nucleic acid binding [GO:0003676 molecular_function] (1)                                                                                                                                                                                        | Ribonuclease H-like domain [IPR012337] (1); HAT, C-terminal dimerization domain [IPR008906] (4)                                                                                        | -                                                                                            | C_ushii_01462_mRNA_9.1  | -                    |
| GF0041017 | 0                        | 1                | 0                 | Hypothetical protein (1)              | -                                                                                                                                                                                                                                                                                                                  | -                                                                                                                                                                                      | -                                                                                            | C_ushii_01462_mRNA_14.1 | -                    |
| GF0041016 | 0                        | 1                | 0                 | Hypothetical protein (1)              | -                                                                                                                                                                                                                                                                                                                  | -                                                                                                                                                                                      | -                                                                                            | C_ushii_01462_mRNA_13.1 | -                    |
| GF0041015 | 0                        | 1                | 0                 | Hypothetical protein (1)              | -                                                                                                                                                                                                                                                                                                                  | -                                                                                                                                                                                      | -                                                                                            | C_ushii_01462_mRNA_12.1 | -                    |
| GF0041014 | 0                        | 1                | 0                 | Hypothetical protein (1)              | -                                                                                                                                                                                                                                                                                                                  | -                                                                                                                                                                                      | -                                                                                            | C_ushii_01462_mRNA_11.1 | -                    |
| GF0041013 | 0                        | 1                | 0                 | Hypothetical protein (1)              | -                                                                                                                                                                                                                                                                                                                  | -                                                                                                                                                                                      | -                                                                                            | C_ushii_01462_mRNA_1.1  | -                    |
| GF0041012 | 0                        | 1                | 0                 | Hypothetical protein (1)              | -                                                                                                                                                                                                                                                                                                                  | -                                                                                                                                                                                      | -                                                                                            | C_ushii_01461_mRNA_8.1  | -                    |
| GF0041011 | 0                        | 1                | 0                 | Hypothetical protein (1)              | -                                                                                                                                                                                                                                                                                                                  | -                                                                                                                                                                                      | -                                                                                            | C_ushii_01461_mRNA_2.1  | -                    |
| GF0041010 | 0                        | 1                | 0                 | Protein YSSC1 (1)                     | protein binding [GO:0005515 molecular_function] (1)                                                                                                                                                                                                                                                                | WD40 repeat [IPR001680] (1); WD40-repeat-containing domain [IPR017986] (1); WD40/VYTN repeat-like-containing domain [IPR015943] (1)                                                    | -                                                                                            | C_ushii_01461_mRNA_1.1  | -                    |
| GF0041009 | 0                        | 1                | 0                 | Hypothetical protein (1)              | transcription factor activity, sequence-specific DNA binding [GO:0003700 molecular_function] (1); regulation of transcription, DNA-templated [GO:0006355 biological_process] (1); sequence-specific DNA binding [GO:0043565 molecular_function] (1)                                                                | Basic-leucine zipper domain [IPR004827] (1)                                                                                                                                            | -                                                                                            | C_ushii_01460_mRNA_7.1  | -                    |
| GF0041008 | 0                        | 1                | 0                 | Hypothetical protein (1)              | -                                                                                                                                                                                                                                                                                                                  | -                                                                                                                                                                                      | -                                                                                            | C_ushii_01460_mRNA_4.1  | -                    |
| GF0041007 | 0                        | 1                | 0                 | Hypothetical protein (1)              | -                                                                                                                                                                                                                                                                                                                  | -                                                                                                                                                                                      | -                                                                                            | C_ushii_01460_mRNA_3.1  | -                    |
| GF0041006 | 0                        | 1                | 0                 | Hypothetical protein (1)              | -                                                                                                                                                                                                                                                                                                                  | -                                                                                                                                                                                      | -                                                                                            | C_ushii_01460_mRNA_2.1  | -                    |
| GF0041005 | 0                        | 1                | 0                 | Hypothetical protein (1)              | -                                                                                                                                                                                                                                                                                                                  | -                                                                                                                                                                                      | -                                                                                            | C_ushii_01460_mRNA_1.1  | -                    |
| GF0041004 | 0                        | 1                | 0                 | Hypothetical protein (1)              | -                                                                                                                                                                                                                                                                                                                  | -                                                                                                                                                                                      | -                                                                                            | C_ushii_01459_mRNA_2.1  | -                    |
| GF0041003 | 0                        | 1                | 0                 | Hypothetical protein (1)              | DUF247 domain protein (1)                                                                                                                                                                                                                                                                                          | Leucine-rich repeat domain, I domain-like [IPR02675] (1)                                                                                                                               | -                                                                                            | C_ushii_01458_mRNA_9.1  | -                    |
| GF0041002 | 0                        | 1                | 0                 | Hypothetical protein (1)              | protein binding [GO:0005515 molecular_function] (1)                                                                                                                                                                                                                                                                | Protein of unknown function DUF247, plant [IPR004158] (1)<br>Askyrin repeat [IPR002110] (1); Askyrin repeat-containing domain [IPR020601] (1)                                          | -                                                                                            | C_ushii_01458_mRNA_1.1  | -                    |

| ID        | Num. in C. crottenstei | Num. in C. caudis | Num. in P. putida | Note                                                                         | GO                                                                                                                                                                                                                                                                                              | InterPro                                                                                                                                                                                                                                                                                                     | Members in C. crottenstei | Members in C. caudis    | Members in P. putida |
|-----------|------------------------|-------------------|-------------------|------------------------------------------------------------------------------|-------------------------------------------------------------------------------------------------------------------------------------------------------------------------------------------------------------------------------------------------------------------------------------------------|--------------------------------------------------------------------------------------------------------------------------------------------------------------------------------------------------------------------------------------------------------------------------------------------------------------|---------------------------|-------------------------|----------------------|
| GF0041001 | 0                      | 1                 | 1                 | 0 Sequiprene synthase (1)                                                    | sequiprene ion binding [GO:000287 molecular_function] (1); terpene synthase activity [GO:0010333 molecular_function] (1); lyase activity [GO:001629 molecular_function] (1); metabolic process [GO:0008152 biological_process] (1)                                                              | Terpene synthase, N-terminal domain [IPRO0196] (1); Terpene synthase-metal-binding domain [IPRO05630] (1); Terpenoid cyclase-protein [IPRO08930] (1); isoprenoid synthase domain [IPRO08949] (1)                                                                                                             | -                         | C_ushii_01457_mRNA_5.1  | -                    |
| GF0041000 | 0                      | 1                 | 0                 | 0 Hypothetical protein (1)                                                   | -                                                                                                                                                                                                                                                                                               | -                                                                                                                                                                                                                                                                                                            | -                         | C_ushii_01457_mRNA_4.1  | -                    |
| GF0040999 | 0                      | 1                 | 0                 | 0 Hypothetical protein (1)                                                   | -                                                                                                                                                                                                                                                                                               | -                                                                                                                                                                                                                                                                                                            | -                         | C_ushii_01456_mRNA_7.1  | -                    |
| GF0040998 | 0                      | 1                 | 0                 | 0 Hypothetical protein (1)                                                   | -                                                                                                                                                                                                                                                                                               | -                                                                                                                                                                                                                                                                                                            | -                         | C_ushii_01456_mRNA_2.1  | -                    |
| GF0040997 | 0                      | 1                 | 0                 | 0 Hypothetical protein (1)                                                   | -                                                                                                                                                                                                                                                                                               | -                                                                                                                                                                                                                                                                                                            | -                         | C_ushii_01455_mRNA_6.1  | -                    |
| GF0040996 | 0                      | 1                 | 0                 | 0 Hypothetical protein (1)                                                   | -                                                                                                                                                                                                                                                                                               | -                                                                                                                                                                                                                                                                                                            | -                         | C_ushii_01455_mRNA_5.1  | -                    |
| GF0040995 | 0                      | 1                 | 0                 | 0 Hypothetical protein (1)                                                   | -                                                                                                                                                                                                                                                                                               | -                                                                                                                                                                                                                                                                                                            | -                         | C_ushii_01455_mRNA_4.1  | -                    |
| GF0040994 | 0                      | 1                 | 0                 | 0 Hypothetical protein (1)                                                   | -                                                                                                                                                                                                                                                                                               | -                                                                                                                                                                                                                                                                                                            | -                         | C_ushii_01454_mRNA_4.1  | -                    |
| GF0040993 | 0                      | 1                 | 0                 | 0 Hypothetical protein (1)                                                   | -                                                                                                                                                                                                                                                                                               | -                                                                                                                                                                                                                                                                                                            | -                         | C_ushii_01454_mRNA_3.1  | -                    |
| GF0040992 | 0                      | 1                 | 0                 | 0 Hypothetical protein (1)                                                   | regulation of transcription, DNA-templated [GO:0006355 biological_process] (1); zinc ion binding [GO:0008270 molecular_function] (1)                                                                                                                                                            | Zinc finger, SWIM-type [IPRO07527] (1); Zinc finger, PAM2-type [IPRO06564] (1); FYF3/FARI family [IPRO11052] (1)                                                                                                                                                                                             | -                         | C_ushii_01453_mRNA_2.1  | -                    |
| GF0040991 | 0                      | 1                 | 0                 | 0 LRR receptor like serine/threonine-protein kinase FL52 (1)                 | protein binding [GO:0005515 molecular_function] (1)                                                                                                                                                                                                                                             | Leucine-rich repeat domain, I domain-like [IPRO32575] (1); Leucine-rich repeat, typical subtype [IPRO33591] (1); MULE transposase domain [IPRO18289] (1); Leucine-rich repeat [IPRO16111] (1); FARI DNA binding domain [IPRO4430] (1); Leucine-rich repeat-containing N-terminal, plant-type [IPRO13210] (1) | -                         | C_ushii_01453_mRNA_1.1  | -                    |
| GF0040990 | 0                      | 1                 | 0                 | 0 Protein SUPPRESSOR OF apr1-1, CONSTITUTIVE 1 (1)                           | -                                                                                                                                                                                                                                                                                               | Leucine-rich repeat domain, I domain-like [IPRO32675] (1)                                                                                                                                                                                                                                                    | -                         | C_ushii_01452_mRNA_6.1  | -                    |
| GF0040989 | 0                      | 1                 | 0                 | 0 Protein SUPPRESSOR OF apr1-1, CONSTITUTIVE 1 (1)                           | -                                                                                                                                                                                                                                                                                               | Leucine-rich repeat domain, I domain-like [IPRO32675] (1)                                                                                                                                                                                                                                                    | -                         | C_ushii_01452_mRNA_4.1  | -                    |
| GF0040988 | 0                      | 1                 | 0                 | 0 Hypothetical protein (1)                                                   | -                                                                                                                                                                                                                                                                                               | Leucine-rich repeat domain, I domain-like [IPRO32675] (1)                                                                                                                                                                                                                                                    | -                         | C_ushii_01451_mRNA_6.1  | -                    |
| GF0040987 | 0                      | 1                 | 0                 | 0 Hypothetical protein (1)                                                   | phosphotransferase activity, alcohol group as acceptor [GO:0016773 molecular_function] (1); carbohydrate metabolic process [GO:0000975 biological_process] (1)                                                                                                                                  | Carbohydrate kinase, FGGY, C-terminal [IPRO18485] (1)                                                                                                                                                                                                                                                        | -                         | C_ushii_01450_mRNA_8.1  | -                    |
| GF0040986 | 0                      | 1                 | 0                 | 0 Hypothetical protein (1)                                                   | phosphotransferase activity, alcohol group as acceptor [GO:0016773 molecular_function] (1); carbohydrate metabolic process [GO:0000975 biological_process] (1)                                                                                                                                  | Carbohydrate kinase, FGGY, conserved site [IPRO18483] (1)                                                                                                                                                                                                                                                    | -                         | C_ushii_01450_mRNA_6.1  | -                    |
| GF0040985 | 0                      | 1                 | 0                 | 0 Hypothetical protein (1)                                                   | protein binding [GO:0005515 molecular_function] (1)                                                                                                                                                                                                                                             | Leucine-rich repeat domain, I domain-like [IPRO32675] (1); Leucine-rich repeat [IPRO16111] (1)                                                                                                                                                                                                               | -                         | C_ushii_01450_mRNA_3.1  | -                    |
| GF0040984 | 0                      | 1                 | 0                 | 0 Hypothetical protein (1)                                                   | -                                                                                                                                                                                                                                                                                               | Histone deacetylase domain [IPRO23801] (1)                                                                                                                                                                                                                                                                   | -                         | C_ushii_01449_mRNA_3.1  | -                    |
| GF0040983 | 0                      | 1                 | 0                 | 0 Cytokinin riboside 5'-monophosphate phosphoribohydrolase (1)               | -                                                                                                                                                                                                                                                                                               | Cytokinin riboside 5'-monophosphate phosphoribohydrolase LOG [IPRO05269] (1); LOG family [IPRO31100] (1)                                                                                                                                                                                                     | -                         | C_ushii_01449_mRNA_1.1  | -                    |
| GF0040982 | 0                      | 1                 | 0                 | 0 Hypothetical protein (1)                                                   | -                                                                                                                                                                                                                                                                                               | -                                                                                                                                                                                                                                                                                                            | -                         | C_ushii_01448_mRNA_8.1  | -                    |
| GF0040981 | 0                      | 1                 | 0                 | 0 Hypothetical protein (1)                                                   | -                                                                                                                                                                                                                                                                                               | -                                                                                                                                                                                                                                                                                                            | -                         | C_ushii_01448_mRNA_7.1  | -                    |
| GF0040980 | 0                      | 1                 | 0                 | 0 Hypothetical protein (1)                                                   | -                                                                                                                                                                                                                                                                                               | -                                                                                                                                                                                                                                                                                                            | -                         | C_ushii_01448_mRNA_6.1  | -                    |
| GF0040979 | 0                      | 1                 | 0                 | 0 Hypothetical protein (1)                                                   | -                                                                                                                                                                                                                                                                                               | -                                                                                                                                                                                                                                                                                                            | -                         | C_ushii_01448_mRNA_4.1  | -                    |
| GF0040978 | 0                      | 1                 | 0                 | 0 Disease resistance protein (1)                                             | ADP binding [GO:0043531 molecular_function] (1)                                                                                                                                                                                                                                                 | Leucine-rich repeat domain, I domain-like [IPRO32675] (1); P-loop containing nucleoside triphosphate hydrolase [IPRO27417] (1); NB-ARC [IPRO02182] (1); AAV-ATPase domain [IPRO0359] (1)                                                                                                                     | -                         | C_ushii_01448_mRNA_1.1  | -                    |
| GF0040977 | 0                      | 1                 | 0                 | 0 Hypothetical protein (1)                                                   | nucleic acid binding [GO:0003676 molecular_function] (1)                                                                                                                                                                                                                                        | Ribonuclease H-like domain [IPRO12337] (1)                                                                                                                                                                                                                                                                   | -                         | C_ushii_01446_mRNA_6.1  | -                    |
| GF0040976 | 0                      | 1                 | 0                 | 0 Hypothetical protein (1)                                                   | -                                                                                                                                                                                                                                                                                               | -                                                                                                                                                                                                                                                                                                            | -                         | C_ushii_01446_mRNA_2.1  | -                    |
| GF0040975 | 0                      | 1                 | 0                 | 0 Hypothetical protein (1)                                                   | ADP binding [GO:0043531 molecular_function] (1)                                                                                                                                                                                                                                                 | P-loop containing nucleoside triphosphate hydrolase [IPRO27417] (1); NB-ARC [IPRO02182] (1); Domain of unknown function DUF1965 [IPRO15410] (1); Leucine-rich repeat domain, I domain-like [IPRO32675] (1)                                                                                                   | -                         | C_ushii_01445_mRNA_7.1  | -                    |
| GF0040974 | 0                      | 1                 | 0                 | 0 Pentatricopeptide repeat-containing family protein (1)                     | zinc ion binding [GO:0008270 molecular_function] (1); protein binding [GO:0005515 molecular_function] (1)                                                                                                                                                                                       | DYW domain [IPRO3267] (1); Pentatricopeptide repeat [IPRO22885] (1); Teratricopeptide-like helical domain [IPRO11990] (1)                                                                                                                                                                                    | -                         | C_ushii_01445_mRNA_4.1  | -                    |
| GF0040973 | 0                      | 1                 | 0                 | 0 Hypothetical protein (1)                                                   | -                                                                                                                                                                                                                                                                                               | -                                                                                                                                                                                                                                                                                                            | -                         | C_ushii_01445_mRNA_2.1  | -                    |
| GF0040972 | 0                      | 1                 | 0                 | 0 Hsu1 domain-containing protein (1)                                         | DNA damage checkpoint [GO:0000077 biological_process] (1); checkpoint clamp complex [GO:0030896 cellular_component] (1); DNA repair [GO:0006281 biological_process] (1)                                                                                                                         | Checkpoint protein Hsu1/Mec3 [IPRO07150] (1)                                                                                                                                                                                                                                                                 | -                         | C_ushii_01445_mRNA_10.1 | -                    |
| GF0040971 | 0                      | 1                 | 0                 | 0 Hypothetical protein (1)                                                   | -                                                                                                                                                                                                                                                                                               | -                                                                                                                                                                                                                                                                                                            | -                         | C_ushii_01445_mRNA_1.1  | -                    |
| GF0040970 | 0                      | 1                 | 0                 | 0 Hypothetical protein (1)                                                   | -                                                                                                                                                                                                                                                                                               | Retrotroposon gag domain [IPRO05162] (1)                                                                                                                                                                                                                                                                     | -                         | C_ushii_01444_mRNA_7.1  | -                    |
| GF0040969 | 0                      | 1                 | 0                 | 0 Truncated Ash2/1370 (1)                                                    | recognition of pollen [GO:0048544 biological_process] (1)                                                                                                                                                                                                                                       | Bulky-peptide domain [IPRO1480] (1); PAN/Apple domain [IPRO13609] (1); S-locus glycoprotein domain [IPRO00838] (1)                                                                                                                                                                                           | -                         | C_ushii_01444_mRNA_10.1 | -                    |
| GF0040968 | 0                      | 1                 | 0                 | 0 Hypothetical protein (1)                                                   | -                                                                                                                                                                                                                                                                                               | -                                                                                                                                                                                                                                                                                                            | -                         | C_ushii_01444_mRNA_1.1  | -                    |
| GF0040967 | 0                      | 1                 | 0                 | 0 Disease resistance protein (CC-NBS-LRR class) family protein (1)           | ADP binding [GO:0043531 molecular_function] (1)                                                                                                                                                                                                                                                 | P-loop containing nucleoside triphosphate hydrolase [IPRO27417] (1); AAV-ATPase domain [IPRO0359] (1); NB-ARC [IPRO02182] (1); Leucine-rich repeat domain, I domain-like [IPRO32675] (1)                                                                                                                     | -                         | C_ushii_01443_mRNA_8.1  | -                    |
| GF0040966 | 0                      | 1                 | 0                 | 0 Hypothetical protein (1)                                                   | -                                                                                                                                                                                                                                                                                               | -                                                                                                                                                                                                                                                                                                            | -                         | C_ushii_01443_mRNA_7.1  | -                    |
| GF0040965 | 0                      | 1                 | 0                 | 0 Hypothetical protein (1)                                                   | -                                                                                                                                                                                                                                                                                               | -                                                                                                                                                                                                                                                                                                            | -                         | C_ushii_01443_mRNA_4.1  | -                    |
| GF0040964 | 0                      | 1                 | 0                 | 0 Phosphoprotein phosphatase isoform 1 (1)                                   | oxidation-reduction process [GO:0055114 biological_process] (1); endonuclease activity [GO:0016991 molecular_function] (1); acyl-acyl-carrier-protein deacetylase activity [GO:0045300 molecular_function] (1); fatty acid metabolic process [GO:0006631 biological_process] (1)                | Ribonucleotide reductase-related [IPRO1248] (1); Ferritin-like superfamily [IPRO0970] (1); Fatty acid deacetylase, type 2 [IPRO05067] (1)                                                                                                                                                                    | -                         | C_ushii_01443_mRNA_2.1  | -                    |
| GF0040963 | 0                      | 1                 | 0                 | 0 Hypothetical protein (1)                                                   | -                                                                                                                                                                                                                                                                                               | -                                                                                                                                                                                                                                                                                                            | -                         | C_ushii_01442_mRNA_1.1  | -                    |
| GF0040962 | 0                      | 1                 | 0                 | 0 Hypothetical protein (1)                                                   | DNA integration [GO:0015074 biological_process] (1); nucleic acid binding [GO:0003676 molecular_function] (1)                                                                                                                                                                                   | Integrase, catalytic core [IPRO1184] (1); Ribonuclease H-like domain [IPRO12337] (1)                                                                                                                                                                                                                         | -                         | C_ushii_01441_mRNA_8.1  | -                    |
| GF0040961 | 0                      | 1                 | 0                 | 0 CTDNA clone/B013129118, full insert sequence (1)                           | -                                                                                                                                                                                                                                                                                               | -                                                                                                                                                                                                                                                                                                            | -                         | C_ushii_01441_mRNA_4.1  | -                    |
| GF0040960 | 0                      | 1                 | 0                 | 0 Hypothetical protein (1)                                                   | cysteine-type peptidase activity [GO:0008234 molecular_function] (1); proteolysis [GO:0006508 biological_process] (1)                                                                                                                                                                           | Ulp1 protease family, C-terminal catalytic domain [IPRO06453] (1)                                                                                                                                                                                                                                            | -                         | C_ushii_01441_mRNA_2.1  | -                    |
| GF0040959 | 0                      | 1                 | 0                 | 0 Hypothetical protein (1)                                                   | -                                                                                                                                                                                                                                                                                               | -                                                                                                                                                                                                                                                                                                            | -                         | C_ushii_01441_mRNA_1.1  | -                    |
| GF0040958 | 0                      | 1                 | 0                 | 0 UDP-glucosyltransferase 83A1 (1)                                           | metabolic process [GO:0008152 biological_process] (1); calcium ion binding [GO:0005509 molecular_function] (1); transferase activity, transferring benzoyl groups [GO:0016758 molecular_function] (1)                                                                                           | EF-Hand 1, calcium-binding site [IPRO12427] (1); EF-hand domain [IPRO0240] (1); UDP-glucosyltransferase [IPRO02213] (1)                                                                                                                                                                                      | -                         | C_ushii_01440_mRNA_9.1  | -                    |
| GF0040957 | 0                      | 1                 | 0                 | 0 Monosaccharide transport protein (1)                                       | -                                                                                                                                                                                                                                                                                               | -                                                                                                                                                                                                                                                                                                            | -                         | C_ushii_01440_mRNA_7.1  | -                    |
| GF0040956 | 0                      | 1                 | 0                 | 0 Monosaccharide transport protein (1)                                       | -                                                                                                                                                                                                                                                                                               | -                                                                                                                                                                                                                                                                                                            | -                         | C_ushii_01440_mRNA_12.1 | -                    |
| GF0040955 | 0                      | 1                 | 0                 | 0 Hypothetical protein (1)                                                   | -                                                                                                                                                                                                                                                                                               | -                                                                                                                                                                                                                                                                                                            | -                         | C_ushii_01440_mRNA_11.1 | -                    |
| GF0040954 | 0                      | 1                 | 0                 | 0 Hypothetical protein (1)                                                   | kinase activity [GO:0016301 molecular_function] (1); carbohydrate metabolic process [GO:0000975 biological_process] (1); metabolic process [GO:0008152 biological_process] (1); phosphoribokinase activity [GO:0000974 molecular_function] (1); ATP binding [GO:0005524 molecular_function] (1) | Phosphoribokinase/uridine kinase [IPRO06083] (1); P-loop containing nucleoside triphosphate hydrolase [IPRO27417] (1); Phosphoribokinase [IPRO06082] (1)                                                                                                                                                     | -                         | C_ushii_01440_mRNA_1.1  | -                    |
| GF0040953 | 0                      | 1                 | 0                 | 0 Disease resistance protein (1)                                             | -                                                                                                                                                                                                                                                                                               | Leucine-rich repeat domain, I domain-like [IPRO32675] (1)                                                                                                                                                                                                                                                    | -                         | C_ushii_01439_mRNA_4.1  | -                    |
| GF0040952 | 0                      | 1                 | 0                 | 0 Hypothetical protein (1)                                                   | -                                                                                                                                                                                                                                                                                               | -                                                                                                                                                                                                                                                                                                            | -                         | C_ushii_01439_mRNA_2.1  | -                    |
| GF0040951 | 0                      | 1                 | 0                 | 0 Disease resistance protein (1)                                             | ADP binding [GO:0043531 molecular_function] (1)                                                                                                                                                                                                                                                 | P-loop containing nucleoside triphosphate hydrolase [IPRO27417] (1); NB-ARC [IPRO02182] (1)                                                                                                                                                                                                                  | -                         | C_ushii_01439_mRNA_1.1  | -                    |
| GF0040950 | 0                      | 1                 | 0                 | 0 Hypothetical protein (1)                                                   | ADP binding [GO:0043531 molecular_function] (1)                                                                                                                                                                                                                                                 | NB-ARC [IPRO02182] (1); P-loop containing nucleoside triphosphate hydrolase [IPRO27417] (1)                                                                                                                                                                                                                  | -                         | C_ushii_01438_mRNA_9.1  | -                    |
| GF0040949 | 0                      | 1                 | 0                 | 0 Disease resistance protein (1)                                             | ADP binding [GO:0043531 molecular_function] (1)                                                                                                                                                                                                                                                 | P-loop containing nucleoside triphosphate hydrolase [IPRO27417] (1); NB-ARC [IPRO02182] (1); Leucine-rich repeat domain, I domain-like [IPRO32675] (1)                                                                                                                                                       | -                         | C_ushii_01438_mRNA_8.1  | -                    |
| GF0040948 | 0                      | 1                 | 0                 | 0 Hypothetical protein (1)                                                   | -                                                                                                                                                                                                                                                                                               | -                                                                                                                                                                                                                                                                                                            | -                         | C_ushii_01438_mRNA_5.1  | -                    |
| GF0040947 | 0                      | 1                 | 0                 | 0 Hypothetical protein (1)                                                   | -                                                                                                                                                                                                                                                                                               | -                                                                                                                                                                                                                                                                                                            | -                         | C_ushii_01438_mRNA_3.1  | -                    |
| GF0040946 | 0                      | 1                 | 0                 | 0 LRR and NB-ARC domains-containing disease resistance protein, positive (1) | -                                                                                                                                                                                                                                                                                               | Leucine-rich repeat domain, I domain-like [IPRO32675] (1)                                                                                                                                                                                                                                                    | -                         | C_ushii_01438_mRNA_2.1  | -                    |
| GF0040945 | 0                      | 1                 | 0                 | 0 Putative disease resistance protein RGA4 (1)                               | ADP binding [GO:0043531 molecular_function] (1)                                                                                                                                                                                                                                                 | P-loop containing nucleoside triphosphate hydrolase [IPRO27417] (1); NB-ARC [IPRO02182] (1)                                                                                                                                                                                                                  | -                         | C_ushii_01438_mRNA_11.1 | -                    |
| GF0040944 | 0                      | 1                 | 0                 | 0 Ras-like GTP-binding protein YPT1 (1)                                      | protein transport [GO:0015031 biological_process] (1); GTP binding [GO:0005235 molecular_function] (1); small GTPase mediated signal transduction [GO:0007264 biological_process] (1)                                                                                                           | P-loop containing nucleoside triphosphate hydrolase [IPRO27417] (1); Small GTPase superfamily, Rab type [IPRO0579] (1); Mitochondrial Rho-like [IPRO13684] (1)                                                                                                                                               | -                         | C_ushii_01438_mRNA_1.1  | -                    |
| GF0040943 | 0                      | 1                 | 0                 | 0 Hypothetical protein (1)                                                   | -                                                                                                                                                                                                                                                                                               | -                                                                                                                                                                                                                                                                                                            | -                         | C_ushii_01435_mRNA_6.1  | -                    |
| GF0040942 | 0                      | 1                 | 0                 | 0 Atpa (1)                                                                   | zinc ion binding [GO:0008270 molecular_function] (1)                                                                                                                                                                                                                                            | Zinc finger, PAM2-type [IPRO06564] (1); Zinc finger, SWIM-type [IPRO07527] (1)                                                                                                                                                                                                                               | -                         | C_ushii_01435_mRNA_3.1  | -                    |
| GF0040941 | 0                      | 1                 | 0                 | 0 Hypothetical protein (1)                                                   | -                                                                                                                                                                                                                                                                                               | -                                                                                                                                                                                                                                                                                                            | -                         | C_ushii_01435_mRNA_2.1  | -                    |
| GF0040940 | 0                      | 1                 | 0                 | 0 Hypothetical protein (1)                                                   | -                                                                                                                                                                                                                                                                                               | -                                                                                                                                                                                                                                                                                                            | -                         | C_ushii_01435_mRNA_1.1  | -                    |
| GF0040939 | 0                      | 1                 | 0                 | 0 Hypothetical protein (1)                                                   | -                                                                                                                                                                                                                                                                                               | -                                                                                                                                                                                                                                                                                                            | -                         | C_ushii_01432_mRNA_9.1  | -                    |
| GF0040938 | 0                      | 1                 | 0                 | 0 Hypothetical protein (1)                                                   | -                                                                                                                                                                                                                                                                                               | -                                                                                                                                                                                                                                                                                                            | -                         | C_ushii_01432_mRNA_7.1  | -                    |

| ID       | Num. in C. crottenstei | Num. in C. auris | Num. in P. putida | Note                                                     | GO                                                                                                                                                                                                                                                                                                                                                                                                             | InterPro                                                                                                                                                                                                                                    | Members in C. crottenstei | Members in C. auris     | Members in P. putida |
|----------|------------------------|------------------|-------------------|----------------------------------------------------------|----------------------------------------------------------------------------------------------------------------------------------------------------------------------------------------------------------------------------------------------------------------------------------------------------------------------------------------------------------------------------------------------------------------|---------------------------------------------------------------------------------------------------------------------------------------------------------------------------------------------------------------------------------------------|---------------------------|-------------------------|----------------------|
| GF004917 | 0                      | 1                | 0                 | Hypothetical protein (1)                                 |                                                                                                                                                                                                                                                                                                                                                                                                                |                                                                                                                                                                                                                                             |                           | C_ushii_01432_mRNA_4.1  |                      |
| GF004916 | 0                      | 1                | 0                 | Hypothetical protein (1)                                 |                                                                                                                                                                                                                                                                                                                                                                                                                |                                                                                                                                                                                                                                             |                           | C_ushii_01432_mRNA_2.1  |                      |
| GF004915 | 0                      | 1                | 0                 | Hypothetical protein (1)                                 |                                                                                                                                                                                                                                                                                                                                                                                                                |                                                                                                                                                                                                                                             |                           | C_ushii_01432_mRNA_15.1 |                      |
| GF004914 | 0                      | 1                | 0                 | Hypothetical protein (1)                                 |                                                                                                                                                                                                                                                                                                                                                                                                                |                                                                                                                                                                                                                                             |                           | C_ushii_01432_mRNA_14.1 |                      |
| GF004913 | 0                      | 1                | 0                 | Hypothetical protein (1)                                 |                                                                                                                                                                                                                                                                                                                                                                                                                |                                                                                                                                                                                                                                             |                           | C_ushii_01432_mRNA_13.1 |                      |
| GF004912 | 0                      | 1                | 0                 | Hypothetical protein (1)                                 |                                                                                                                                                                                                                                                                                                                                                                                                                |                                                                                                                                                                                                                                             |                           | C_ushii_01432_mRNA_12.1 |                      |
| GF004911 | 0                      | 1                | 0                 | Hypothetical protein (1)                                 |                                                                                                                                                                                                                                                                                                                                                                                                                |                                                                                                                                                                                                                                             |                           | C_ushii_01432_mRNA_1.1  |                      |
| GF004910 | 0                      | 1                | 0                 | Hypothetical protein (1)                                 |                                                                                                                                                                                                                                                                                                                                                                                                                |                                                                                                                                                                                                                                             |                           | C_ushii_01431_mRNA_9.1  |                      |
| GF004909 | 0                      | 1                | 0                 | Hypothetical protein (1)                                 |                                                                                                                                                                                                                                                                                                                                                                                                                |                                                                                                                                                                                                                                             |                           | C_ushii_01431_mRNA_6.1  |                      |
| GF004928 | 0                      | 1                | 0                 | Hypothetical protein (1)                                 | protein binding [GO:0005515 molecular_function] (1); Ankyrin repeat family protein (1)                                                                                                                                                                                                                                                                                                                         | Ankyrin repeat-containing domain [IPR020683] (1); Ankyrin repeat [IPR002110] (4)                                                                                                                                                            |                           | C_ushii_01431_mRNA_3.1  |                      |
| GF004927 | 0                      | 1                | 0                 | Hypothetical protein (1)                                 |                                                                                                                                                                                                                                                                                                                                                                                                                |                                                                                                                                                                                                                                             |                           | C_ushii_01429_mRNA_6.1  |                      |
| GF004926 | 0                      | 1                | 0                 | Hypothetical protein (1)                                 |                                                                                                                                                                                                                                                                                                                                                                                                                |                                                                                                                                                                                                                                             |                           | C_ushii_01428_mRNA_8.1  |                      |
| GF004925 | 0                      | 1                | 0                 | Cytokinin riboside 5'-monophosphate phosphohydrolase (1) |                                                                                                                                                                                                                                                                                                                                                                                                                |                                                                                                                                                                                                                                             |                           | C_ushii_01428_mRNA_1.1  |                      |
| GF004924 | 0                      | 1                | 0                 | Hypothetical protein (1)                                 |                                                                                                                                                                                                                                                                                                                                                                                                                |                                                                                                                                                                                                                                             |                           | C_ushii_01427_mRNA_4.1  |                      |
| GF004923 | 0                      | 1                | 0                 | Hypothetical protein (1)                                 | zinc ion binding [GO:0008270 molecular_function] (1); nucleic acid binding [GO:0000376 molecular_function] (1)                                                                                                                                                                                                                                                                                                 | Zinc finger, CCHC-type [IPR001878] (1)                                                                                                                                                                                                      |                           | C_ushii_01427_mRNA_3.1  |                      |
| GF004922 | 0                      | 1                | 0                 | Hypothetical protein (1)                                 |                                                                                                                                                                                                                                                                                                                                                                                                                |                                                                                                                                                                                                                                             |                           | C_ushii_01426_mRNA_7.1  |                      |
| GF004921 | 0                      | 1                | 0                 | Hypothetical protein (1)                                 |                                                                                                                                                                                                                                                                                                                                                                                                                |                                                                                                                                                                                                                                             |                           | C_ushii_01426_mRNA_3.1  |                      |
| GF004920 | 0                      | 1                | 0                 | Putative disease resistance protein (1)                  |                                                                                                                                                                                                                                                                                                                                                                                                                |                                                                                                                                                                                                                                             |                           | C_ushii_01426_mRNA_2.1  |                      |
| GF004919 | 0                      | 1                | 0                 | Hypothetical protein (1)                                 |                                                                                                                                                                                                                                                                                                                                                                                                                |                                                                                                                                                                                                                                             |                           | C_ushii_01426_mRNA_1.1  |                      |
| GF004918 | 0                      | 1                | 0                 | Hypothetical protein (1)                                 | guanyl nucleotide binding [GO:019001 molecular_function] (1); signal transducer activity [GO:0004871 molecular_function] (1); GTPase activity [GO:0003924 molecular_function] (1); G-protein beta gamma-subunit complex binding [GO:0010183 molecular_function] (1); signal transduction [GO:0007165 biological_process] (1); G-protein coupled receptor signaling pathway [GO:0007186 biological_process] (1) | NTP2-like domain [IPR023710] (1); Ulp1 protease family, C-terminal catalytic domain [IPR003653] (1)                                                                                                                                         |                           | C_ushii_01425_mRNA_3.1  |                      |
| GF004917 | 0                      | 1                | 0                 | Hypothetical protein (1)                                 |                                                                                                                                                                                                                                                                                                                                                                                                                |                                                                                                                                                                                                                                             |                           | C_ushii_01424_mRNA_3.1  |                      |
| GF004916 | 0                      | 1                | 0                 | Hypothetical protein (1)                                 |                                                                                                                                                                                                                                                                                                                                                                                                                |                                                                                                                                                                                                                                             |                           | C_ushii_01424_mRNA_2.1  |                      |
| GF004915 | 0                      | 1                | 0                 | Hypothetical protein (1)                                 |                                                                                                                                                                                                                                                                                                                                                                                                                |                                                                                                                                                                                                                                             |                           | C_ushii_01424_mRNA_1.1  |                      |
| GF004914 | 0                      | 1                | 0                 | Hypothetical protein (1)                                 |                                                                                                                                                                                                                                                                                                                                                                                                                |                                                                                                                                                                                                                                             |                           | C_ushii_01423_mRNA_1.1  |                      |
| GF004913 | 0                      | 1                | 0                 | Hypothetical protein (1)                                 |                                                                                                                                                                                                                                                                                                                                                                                                                |                                                                                                                                                                                                                                             |                           | C_ushii_01422_mRNA_7.1  |                      |
| GF004912 | 0                      | 1                | 0                 | Hypothetical protein (1)                                 |                                                                                                                                                                                                                                                                                                                                                                                                                |                                                                                                                                                                                                                                             |                           | C_ushii_01421_mRNA_5.1  |                      |
| GF004911 | 0                      | 1                | 0                 | Hypothetical protein (1)                                 |                                                                                                                                                                                                                                                                                                                                                                                                                |                                                                                                                                                                                                                                             |                           | C_ushii_01420_mRNA_6.1  |                      |
| GF004910 | 0                      | 1                | 0                 | Hypothetical protein (1)                                 |                                                                                                                                                                                                                                                                                                                                                                                                                |                                                                                                                                                                                                                                             |                           | C_ushii_01420_mRNA_4.1  |                      |
| GF004909 | 0                      | 1                | 0                 | Hypothetical protein (1)                                 |                                                                                                                                                                                                                                                                                                                                                                                                                |                                                                                                                                                                                                                                             |                           | C_ushii_01420_mRNA_3.1  |                      |
| GF004908 | 0                      | 1                | 0                 | Hypothetical protein (1)                                 |                                                                                                                                                                                                                                                                                                                                                                                                                |                                                                                                                                                                                                                                             |                           | C_ushii_01420_mRNA_2.1  |                      |
| GF004907 | 0                      | 1                | 0                 | Cytokinin riboside 5'-monophosphate phosphohydrolase (1) |                                                                                                                                                                                                                                                                                                                                                                                                                |                                                                                                                                                                                                                                             |                           | C_ushii_01420_mRNA_1.1  |                      |
| GF004906 | 0                      | 1                | 0                 | Hypothetical protein (1)                                 |                                                                                                                                                                                                                                                                                                                                                                                                                |                                                                                                                                                                                                                                             |                           | C_ushii_01419_mRNA_4.1  |                      |
| GF004905 | 0                      | 1                | 0                 | Hypothetical protein (1)                                 |                                                                                                                                                                                                                                                                                                                                                                                                                |                                                                                                                                                                                                                                             |                           | C_ushii_01418_mRNA_8.1  |                      |
| GF004904 | 0                      | 1                | 0                 | Aspartic proteinase-like protein 1 (1)                   | aspartic-type endopeptidase activity [GO:0004190 molecular_function] (1); proteolysis [GO:0006508 biological_process] (1)                                                                                                                                                                                                                                                                                      | Xylanase inhibitor, C-terminal [IPR023299] (1); Aspartic proteinase A1 family [IPR001461] (1); Aspartic peptidase domain [IPR021109] (1); Peptidase family A1 domain [IPR033121] (1)                                                        |                           | C_ushii_01418_mRNA_6.1  |                      |
| GF004903 | 0                      | 1                | 0                 | Hypothetical protein (1)                                 | protein dephosphorylation [GO:0006470 biological_process] (1); protein serine/threonine phosphatase activity [GO:0004722 molecular_function] (1)                                                                                                                                                                                                                                                               | Protein phosphatase 2C family [IPR015655] (4)                                                                                                                                                                                               |                           | C_ushii_01418_mRNA_11.1 |                      |
| GF004902 | 0                      | 1                | 0                 | Hypothetical protein (1)                                 | nucleic acid binding [GO:0003676 molecular_function] (1); zinc ion binding [GO:0008270 molecular_function] (1)                                                                                                                                                                                                                                                                                                 | Zinc finger, CCHC-type [IPR001878] (1)                                                                                                                                                                                                      |                           | C_ushii_01417_mRNA_3.1  |                      |
| GF004901 | 0                      | 1                | 0                 | Hypothetical protein (1)                                 | proteolysis [GO:0006508 biological_process] (1); metallopeptidase activity [GO:0004181 molecular_function] (1); zinc ion binding [GO:0008270 molecular_function] (1)                                                                                                                                                                                                                                           | Peptidase M14, carboxypeptidase A [IPR000834] (4)                                                                                                                                                                                           |                           | C_ushii_01416_mRNA_3.1  |                      |
| GF004900 | 0                      | 1                | 0                 | Hypothetical protein (1)                                 | membrane [GO:0016020 cellular_component] (1); potassium ion transmembrane transport [GO:0071805 biological_process] (1); potassium ion transmembrane transporter activity [GO:0015079 molecular_function] (1)                                                                                                                                                                                                  | Potassium transporter [IPR003855] (1)                                                                                                                                                                                                       |                           | C_ushii_01414_mRNA_9.1  |                      |
| GF004899 | 0                      | 1                | 0                 | Hypothetical protein (1)                                 |                                                                                                                                                                                                                                                                                                                                                                                                                |                                                                                                                                                                                                                                             |                           | C_ushii_01414_mRNA_5.1  |                      |
| GF004898 | 0                      | 1                | 0                 | Hypothetical protein (1)                                 |                                                                                                                                                                                                                                                                                                                                                                                                                |                                                                                                                                                                                                                                             |                           | C_ushii_01414_mRNA_4.1  |                      |
| GF004897 | 0                      | 1                | 0                 | Hypothetical protein (1)                                 |                                                                                                                                                                                                                                                                                                                                                                                                                |                                                                                                                                                                                                                                             |                           | C_ushii_01414_mRNA_1.1  |                      |
| GF004896 | 0                      | 1                | 0                 | DUF760 family protein (1)                                |                                                                                                                                                                                                                                                                                                                                                                                                                |                                                                                                                                                                                                                                             |                           | C_ushii_01413_mRNA_7.1  |                      |
| GF004895 | 0                      | 1                | 0                 | Hypothetical protein (1)                                 |                                                                                                                                                                                                                                                                                                                                                                                                                |                                                                                                                                                                                                                                             |                           | C_ushii_01413_mRNA_6.1  |                      |
| GF004894 | 0                      | 1                | 0                 | Hypothetical protein (1)                                 | oxidoreductase activity [GO:0016491 molecular_function] (1); oxidation-reduction process [GO:0055114 biological_process] (1)                                                                                                                                                                                                                                                                                   | FAD(NAD(P)) binding domain [IPR023753] (1)                                                                                                                                                                                                  |                           | C_ushii_01413_mRNA_4.1  |                      |
| GF004893 | 0                      | 1                | 0                 | Hypothetical protein (1)                                 |                                                                                                                                                                                                                                                                                                                                                                                                                |                                                                                                                                                                                                                                             |                           | C_ushii_01413_mRNA_3.1  |                      |
| GF004892 | 0                      | 1                | 0                 | Hypothetical protein (1)                                 |                                                                                                                                                                                                                                                                                                                                                                                                                |                                                                                                                                                                                                                                             |                           | C_ushii_01413_mRNA_1.1  |                      |
| GF004891 | 0                      | 1                | 0                 | Hypothetical protein (1)                                 |                                                                                                                                                                                                                                                                                                                                                                                                                |                                                                                                                                                                                                                                             |                           | C_ushii_01412_mRNA_7.1  |                      |
| GF004890 | 0                      | 1                | 0                 | Hypothetical protein (1)                                 |                                                                                                                                                                                                                                                                                                                                                                                                                |                                                                                                                                                                                                                                             |                           | C_ushii_01412_mRNA_6.1  |                      |
| GF004889 | 0                      | 1                | 0                 | Hypothetical protein (1)                                 |                                                                                                                                                                                                                                                                                                                                                                                                                |                                                                                                                                                                                                                                             |                           | C_ushii_01412_mRNA_5.1  |                      |
| GF004888 | 0                      | 1                | 0                 | Hypothetical protein (1)                                 |                                                                                                                                                                                                                                                                                                                                                                                                                |                                                                                                                                                                                                                                             |                           | C_ushii_01412_mRNA_4.1  |                      |
| GF004887 | 0                      | 1                | 0                 | Hypothetical protein (1)                                 |                                                                                                                                                                                                                                                                                                                                                                                                                |                                                                                                                                                                                                                                             |                           | C_ushii_01412_mRNA_10.1 |                      |
| GF004886 | 0                      | 1                | 0                 | Hypothetical protein (1)                                 |                                                                                                                                                                                                                                                                                                                                                                                                                |                                                                                                                                                                                                                                             |                           | C_ushii_01412_mRNA_1.1  |                      |
| GF004885 | 0                      | 1                | 0                 | Hypothetical protein (1)                                 |                                                                                                                                                                                                                                                                                                                                                                                                                |                                                                                                                                                                                                                                             |                           | C_ushii_01410_mRNA_7.1  |                      |
| GF004884 | 0                      | 1                | 0                 | Hypothetical protein (1)                                 |                                                                                                                                                                                                                                                                                                                                                                                                                |                                                                                                                                                                                                                                             |                           | C_ushii_01409_mRNA_7.1  |                      |
| GF004883 | 0                      | 1                | 0                 | Hypothetical protein (1)                                 |                                                                                                                                                                                                                                                                                                                                                                                                                |                                                                                                                                                                                                                                             |                           | C_ushii_01409_mRNA_5.1  |                      |
| GF004882 | 0                      | 1                | 0                 | Phosphoprotein phosphatase (1)                           |                                                                                                                                                                                                                                                                                                                                                                                                                |                                                                                                                                                                                                                                             |                           | C_ushii_01408_mRNA_8.1  |                      |
| GF004881 | 0                      | 1                | 0                 | Hypothetical protein (1)                                 |                                                                                                                                                                                                                                                                                                                                                                                                                |                                                                                                                                                                                                                                             |                           | C_ushii_01408_mRNA_7.1  |                      |
| GF004880 | 0                      | 1                | 0                 | Hypothetical protein (1)                                 |                                                                                                                                                                                                                                                                                                                                                                                                                |                                                                                                                                                                                                                                             |                           | C_ushii_01408_mRNA_6.1  |                      |
| GF004879 | 0                      | 1                | 0                 | Hypothetical protein (1)                                 | metabolic process [GO:0008132 biological_process] (1); transferase activity, transferring hexoyl groups [GO:0016758 molecular_function] (1)                                                                                                                                                                                                                                                                    | UDP-glucuronosyl/UDP-glucosyltransferase [IPR002213] (1)                                                                                                                                                                                    |                           | C_ushii_01408_mRNA_4.1  |                      |
| GF004878 | 0                      | 1                | 0                 | Hypothetical protein (1)                                 |                                                                                                                                                                                                                                                                                                                                                                                                                |                                                                                                                                                                                                                                             |                           | C_ushii_01407_mRNA_9.1  |                      |
| GF004877 | 0                      | 1                | 0                 | Hypothetical protein (1)                                 |                                                                                                                                                                                                                                                                                                                                                                                                                |                                                                                                                                                                                                                                             |                           | C_ushii_01407_mRNA_2.1  |                      |
| GF004876 | 0                      | 1                | 0                 | Hypothetical protein (1)                                 |                                                                                                                                                                                                                                                                                                                                                                                                                |                                                                                                                                                                                                                                             |                           | C_ushii_01407_mRNA_14.1 |                      |
| GF004875 | 0                      | 1                | 0                 | Hypothetical protein (1)                                 |                                                                                                                                                                                                                                                                                                                                                                                                                |                                                                                                                                                                                                                                             |                           | C_ushii_01407_mRNA_13.1 |                      |
| GF004874 | 0                      | 1                | 0                 | Hypothetical protein (1)                                 |                                                                                                                                                                                                                                                                                                                                                                                                                |                                                                                                                                                                                                                                             |                           | C_ushii_01407_mRNA_10.1 |                      |
| GF004873 | 0                      | 1                | 0                 | Hypothetical protein (1)                                 |                                                                                                                                                                                                                                                                                                                                                                                                                |                                                                                                                                                                                                                                             |                           | C_ushii_01407_mRNA_1.1  |                      |
| GF004872 | 0                      | 1                | 0                 | Hypothetical protein (1)                                 | carbohydrate metabolic process [GO:005975 biological_process] (1); polygalacturonase activity [GO:0004650 molecular_function] (1)                                                                                                                                                                                                                                                                              | Pectin lyase fold [IPR012334] (1); Pectin lyase fold/variable factor [IPR011050] (1); Glycoside hydrolase, family 28 [IPR007431] (1)                                                                                                        |                           | C_ushii_01406_mRNA_3.1  |                      |
| GF004871 | 0                      | 1                | 0                 | Hypothetical protein (1)                                 | polygalacturonase activity [GO:0004650 molecular_function] (1); carbohydrate metabolic process [GO:0005975 biological_process] (1)                                                                                                                                                                                                                                                                             | Pectin lyase fold/variable factor [IPR011050] (1); Pectin lyase fold [IPR012334] (1); Glycoside hydrolase, family 28 [IPR007431] (1)                                                                                                        |                           | C_ushii_01406_mRNA_2.1  |                      |
| GF004870 | 0                      | 1                | 0                 | Hypothetical protein (1)                                 | polygalacturonase activity [GO:0004650 molecular_function] (1); carbohydrate metabolic process [GO:0005975 biological_process] (1)                                                                                                                                                                                                                                                                             | Pectin lyase fold [IPR012334] (1); Pectin lyase fold/variable factor [IPR011050] (1); Glycoside hydrolase, family 28 [IPR007431] (1)                                                                                                        |                           | C_ushii_01406_mRNA_1.1  |                      |
| GF004869 | 0                      | 1                | 0                 | Hypothetical protein (1)                                 | carbohydrate metabolic process [GO:005975 biological_process] (1); polygalacturonase activity [GO:0004650 molecular_function] (1)                                                                                                                                                                                                                                                                              | Glycoside hydrolase, family 28 [IPR007431] (1); Pectin lyase fold/variable factor [IPR011050] (1); Pectin lyase fold [IPR012334] (1)                                                                                                        |                           | C_ushii_01405_mRNA_6.1  |                      |
| GF004868 | 0                      | 1                | 0                 | Polygalacturonase 7 (1)                                  |                                                                                                                                                                                                                                                                                                                                                                                                                |                                                                                                                                                                                                                                             |                           | C_ushii_01405_mRNA_1.1  |                      |
| GF004867 | 0                      | 1                | 0                 | Hypothetical protein (1)                                 |                                                                                                                                                                                                                                                                                                                                                                                                                |                                                                                                                                                                                                                                             |                           | C_ushii_01405_mRNA_12.1 |                      |
| GF004866 | 0                      | 1                | 0                 | Hypothetical protein (1)                                 |                                                                                                                                                                                                                                                                                                                                                                                                                |                                                                                                                                                                                                                                             |                           | C_ushii_01404_mRNA_8.1  |                      |
| GF004865 | 0                      | 1                | 0                 | Hypothetical protein (1)                                 |                                                                                                                                                                                                                                                                                                                                                                                                                |                                                                                                                                                                                                                                             |                           | C_ushii_01403_mRNA_3.1  |                      |
| GF004864 | 0                      | 1                | 0                 | Hypothetical protein (1)                                 |                                                                                                                                                                                                                                                                                                                                                                                                                |                                                                                                                                                                                                                                             |                           | C_ushii_01403_mRNA_2.1  |                      |
| GF004863 | 0                      | 1                | 0                 | Scopolipene synthase (1)                                 | metabolic process [GO:0008132 biological_process] (1); lyase activity [GO:0016829 molecular_function] (1); terpenoid synthase activity [GO:0010323 molecular_function] (1); magnesium ion binding [GO:0000287 molecular_function] (1)                                                                                                                                                                          | Imprenilid synthase domain [IPR008949] (1); Terpenoid cyclase/protein prenyltransferase alpha-alpha toroid [IPR008930] (1); Terpenoid synthase, N-terminal domain [IPR001906] (1); Terpenoid synthase, metal-binding domain [IPR006301] (1) |                           | C_ushii_01403_mRNA_1.1  |                      |
| GF004862 | 0                      | 1                | 0                 | Limonene synthase (1)                                    | magnesium ion binding [GO:0000287 molecular_function] (1); terpenoid synthase activity [GO:0010323 molecular_function] (1); lyase activity [GO:0016829 molecular_function] (1); metabolic process [GO:0008132 biological_process] (1)                                                                                                                                                                          | Terpenoid cyclase/protein prenyltransferase alpha-alpha toroid [IPR008930] (1); Terpenoid synthase, metal-binding domain [IPR006301] (1); Terpenoid synthase, N-terminal domain [IPR001906] (1); Imprenilid synthase domain [IPR008949] (1) |                           | C_ushii_01402_mRNA_2.1  |                      |

| ID       | Num. in <i>C. crotolariae</i> | Num. in <i>C. auris</i> | Num. in <i>P. putida</i> | Note                                                                                                                  | GO                                                                                                                                                                                                                                                                                                                                    | InterPro                                                                                                                                                                                                                                                       | Members in <i>C. crotolariae</i> | Members in <i>C. auris</i> | Members in <i>P. putida</i> |
|----------|-------------------------------|-------------------------|--------------------------|-----------------------------------------------------------------------------------------------------------------------|---------------------------------------------------------------------------------------------------------------------------------------------------------------------------------------------------------------------------------------------------------------------------------------------------------------------------------------|----------------------------------------------------------------------------------------------------------------------------------------------------------------------------------------------------------------------------------------------------------------|----------------------------------|----------------------------|-----------------------------|
| GF004861 | 0                             | 1                       | 0                        | Hypothetical protein (1)                                                                                              | terpene synthase activity [GO:0010333 molecular_function] (1); lyase activity [GO:0016293 molecular_function] (1); nucleotide process [GO:0008152 biological_process] (1)                                                                                                                                                             | Terpene synthase, N-terminal domain [IPR001960] (1); Terpenoid cyclase protein prenyltransferase alpha-alpha toad [IPR008930] (1)                                                                                                                              | -                                | C_ushii_01402_mRNA_1.1     | -                           |
| GF004860 | 0                             | 1                       | 0                        | RNA-directed DNA polymerase (Reverse transcriptase); Polymetastudy] transferase; Ribonuclease H fold-like protein (1) | RNA-DNA hybrid ribonuclease activity [GO:0004232 molecular_function] (1); nucleic acid binding [GO:0003676 molecular_function] (1)                                                                                                                                                                                                    | Ribonuclease H domain [IPR002156] (1); Reverse transcriptase zinc-binding domain [IPR026960] (1); Ribonuclease H-like domain [IPR02337] (1)                                                                                                                    | -                                | C_ushii_01401_mRNA_8.1     | -                           |
| GF004859 | 0                             | 1                       | 0                        | Hypothetical protein (1)                                                                                              |                                                                                                                                                                                                                                                                                                                                       | Lactacin repeat domain, L. domain-like [IPR02675] (1)                                                                                                                                                                                                          | -                                | C_ushii_01401_mRNA_7.1     | -                           |
| GF004858 | 0                             | 1                       | 0                        | Tetratricopeptide repeat (TPR)-containing protein-like (1)                                                            |                                                                                                                                                                                                                                                                                                                                       | Clustered mitochondria protein, N-terminal [IPR02975] (1)                                                                                                                                                                                                      | -                                | C_ushii_01401_mRNA_3.1     | -                           |
| GF004857 | 0                             | 1                       | 0                        | Hypothetical protein (1)                                                                                              | protein binding [GO:0005515 molecular_function] (1)                                                                                                                                                                                                                                                                                   | Tetratricopeptide-like helical domain [IPR011990] (1)                                                                                                                                                                                                          | -                                | C_ushii_01401_mRNA_1.1     | -                           |
| GF004856 | 0                             | 1                       | 0                        | Hypothetical protein (1)                                                                                              |                                                                                                                                                                                                                                                                                                                                       | -                                                                                                                                                                                                                                                              | -                                | C_ushii_01400_mRNA_6.1     | -                           |
| GF004855 | 0                             | 1                       | 0                        | Hypothetical protein (1)                                                                                              |                                                                                                                                                                                                                                                                                                                                       | -                                                                                                                                                                                                                                                              | -                                | C_ushii_01400_mRNA_5.1     | -                           |
| GF004854 | 0                             | 1                       | 0                        | Hypothetical protein (1)                                                                                              |                                                                                                                                                                                                                                                                                                                                       | -                                                                                                                                                                                                                                                              | -                                | C_ushii_01400_mRNA_1.1     | -                           |
| GF004853 | 0                             | 1                       | 0                        | Hypothetical protein (1)                                                                                              |                                                                                                                                                                                                                                                                                                                                       | -                                                                                                                                                                                                                                                              | -                                | C_ushii_01399_mRNA_7.1     | -                           |
| GF004852 | 0                             | 1                       | 0                        | Hypothetical protein (1)                                                                                              |                                                                                                                                                                                                                                                                                                                                       | -                                                                                                                                                                                                                                                              | -                                | C_ushii_01399_mRNA_3.1     | -                           |
| GF004851 | 0                             | 1                       | 0                        | Hypothetical protein (1)                                                                                              |                                                                                                                                                                                                                                                                                                                                       | -                                                                                                                                                                                                                                                              | -                                | C_ushii_01397_mRNA_9.1     | -                           |
| GF004850 | 0                             | 1                       | 0                        | Hypothetical protein (1)                                                                                              |                                                                                                                                                                                                                                                                                                                                       | -                                                                                                                                                                                                                                                              | -                                | C_ushii_01397_mRNA_1.1     | -                           |
| GF004849 | 0                             | 1                       | 0                        | Hypothetical protein (1)                                                                                              |                                                                                                                                                                                                                                                                                                                                       | -                                                                                                                                                                                                                                                              | -                                | C_ushii_01396_mRNA_9.1     | -                           |
| GF004848 | 0                             | 1                       | 0                        | Hypothetical protein (1)                                                                                              |                                                                                                                                                                                                                                                                                                                                       | -                                                                                                                                                                                                                                                              | -                                | C_ushii_01396_mRNA_8.1     | -                           |
| GF004847 | 0                             | 1                       | 0                        | Hypothetical protein (1)                                                                                              |                                                                                                                                                                                                                                                                                                                                       | -                                                                                                                                                                                                                                                              | -                                | C_ushii_01396_mRNA_6.1     | -                           |
| GF004846 | 0                             | 1                       | 0                        | Hypothetical protein (1)                                                                                              | protein kinase activity [GO:0004672 molecular_function] (1); protein phosphorylation [GO:0006468 biological_process] (1)                                                                                                                                                                                                              | Serine-threonine/tyrosine-protein kinase catalytic domain [IPR01265] (1); Protein kinase-like domain [IPR011099] (1)                                                                                                                                           | -                                | C_ushii_01396_mRNA_5.1     | -                           |
| GF004845 | 0                             | 1                       | 0                        | Hypothetical protein (1)                                                                                              |                                                                                                                                                                                                                                                                                                                                       | -                                                                                                                                                                                                                                                              | -                                | C_ushii_01396_mRNA_4.1     | -                           |
| GF004844 | 0                             | 1                       | 0                        | Hypothetical protein (1)                                                                                              |                                                                                                                                                                                                                                                                                                                                       | -                                                                                                                                                                                                                                                              | -                                | C_ushii_01396_mRNA_10.1    | -                           |
| GF004843 | 0                             | 1                       | 0                        | Hypothetical protein (1)                                                                                              | recognition of pollen [GO:0048544 biological_process] (1); protein serine/threonine kinase activity [GO:0004674 molecular_function] (1)                                                                                                                                                                                               | S-locus receptor kinase, C-terminal [IPR021620] (1); S-locus glycoprotein domain [IPR00688] (1); FAN/apple domain [IPR003609] (1); Protein kinase-like domain [IPR011099] (1)                                                                                  | -                                | C_ushii_01396_mRNA_1.1     | -                           |
| GF004842 | 0                             | 1                       | 0                        | Hypothetical protein (1)                                                                                              |                                                                                                                                                                                                                                                                                                                                       | -                                                                                                                                                                                                                                                              | -                                | C_ushii_01395_mRNA_3.1     | -                           |
| GF004841 | 0                             | 1                       | 0                        | Hypothetical protein (1)                                                                                              |                                                                                                                                                                                                                                                                                                                                       | -                                                                                                                                                                                                                                                              | -                                | C_ushii_01394_mRNA_7.1     | -                           |
| GF004840 | 0                             | 1                       | 0                        | Hypothetical protein (1)                                                                                              |                                                                                                                                                                                                                                                                                                                                       | -                                                                                                                                                                                                                                                              | -                                | C_ushii_01394_mRNA_6.1     | -                           |
| GF004839 | 0                             | 1                       | 0                        | Hypothetical protein (1)                                                                                              |                                                                                                                                                                                                                                                                                                                                       | -                                                                                                                                                                                                                                                              | -                                | C_ushii_01394_mRNA_2.1     | -                           |
| GF004838 | 0                             | 1                       | 0                        | Hypothetical protein (1)                                                                                              |                                                                                                                                                                                                                                                                                                                                       | -                                                                                                                                                                                                                                                              | -                                | C_ushii_01394_mRNA_1.1     | -                           |
| GF004837 | 0                             | 1                       | 0                        | Hypothetical protein (1)                                                                                              |                                                                                                                                                                                                                                                                                                                                       | -                                                                                                                                                                                                                                                              | -                                | C_ushii_01393_mRNA_6.1     | -                           |
| GF004836 | 0                             | 1                       | 0                        | Hypothetical protein (1)                                                                                              |                                                                                                                                                                                                                                                                                                                                       | -                                                                                                                                                                                                                                                              | -                                | C_ushii_01392_mRNA_8.1     | -                           |
| GF004835 | 0                             | 1                       | 0                        | Hypothetical protein (1)                                                                                              | ADP binding [GO:0043531 molecular_function] (1)                                                                                                                                                                                                                                                                                       | P-loop containing nucleoside triphosphate hydrolase [IPR027417] (1); NB-ARC [IPR002492] (1)                                                                                                                                                                    | -                                | C_ushii_01392_mRNA_4.1     | -                           |
| GF004834 | 0                             | 1                       | 0                        | Hypothetical protein (1)                                                                                              |                                                                                                                                                                                                                                                                                                                                       | -                                                                                                                                                                                                                                                              | -                                | C_ushii_01392_mRNA_2.1     | -                           |
| GF004833 | 0                             | 1                       | 0                        | Hypothetical protein (1)                                                                                              |                                                                                                                                                                                                                                                                                                                                       | -                                                                                                                                                                                                                                                              | -                                | C_ushii_01391_mRNA_4.1     | -                           |
| GF004832 | 0                             | 1                       | 0                        | Hypothetical protein (1)                                                                                              |                                                                                                                                                                                                                                                                                                                                       | -                                                                                                                                                                                                                                                              | -                                | C_ushii_01390_mRNA_3.1     | -                           |
| GF004831 | 0                             | 1                       | 0                        | Hypothetical protein (1)                                                                                              | zinc ion binding [GO:0008270 molecular_function] (1); nucleic acid binding [GO:0003676 molecular_function] (1)                                                                                                                                                                                                                        | Zinc finger, CCHC-type [IPR01878] (1)                                                                                                                                                                                                                          | -                                | C_ushii_01390_mRNA_1.1     | -                           |
| GF004830 | 0                             | 1                       | 0                        | Hypothetical protein (1)                                                                                              |                                                                                                                                                                                                                                                                                                                                       | -                                                                                                                                                                                                                                                              | -                                | C_ushii_01388_mRNA_5.1     | -                           |
| GF004829 | 0                             | 1                       | 0                        | Hypothetical protein (1)                                                                                              |                                                                                                                                                                                                                                                                                                                                       | -                                                                                                                                                                                                                                                              | -                                | C_ushii_01388_mRNA_3.1     | -                           |
| GF004828 | 0                             | 1                       | 0                        | Hypothetical protein (1)                                                                                              |                                                                                                                                                                                                                                                                                                                                       | -                                                                                                                                                                                                                                                              | -                                | C_ushii_01388_mRNA_2.1     | -                           |
| GF004827 | 0                             | 1                       | 0                        | Hypothetical protein (1)                                                                                              |                                                                                                                                                                                                                                                                                                                                       | -                                                                                                                                                                                                                                                              | -                                | C_ushii_01386_mRNA_1.1     | -                           |
| GF004826 | 0                             | 1                       | 0                        | Hypothetical protein (1)                                                                                              |                                                                                                                                                                                                                                                                                                                                       | -                                                                                                                                                                                                                                                              | -                                | C_ushii_01387_mRNA_4.1     | -                           |
| GF004825 | 0                             | 1                       | 0                        | Hypothetical protein (1)                                                                                              |                                                                                                                                                                                                                                                                                                                                       | Histone deacetylase domain [IPR023801] (1)                                                                                                                                                                                                                     | -                                | C_ushii_01387_mRNA_1.1     | -                           |
| GF004824 | 0                             | 1                       | 0                        | Hypothetical protein (1)                                                                                              |                                                                                                                                                                                                                                                                                                                                       | -                                                                                                                                                                                                                                                              | -                                | C_ushii_01386_mRNA_2.1     | -                           |
| GF004823 | 0                             | 1                       | 0                        | Hypothetical protein (1)                                                                                              |                                                                                                                                                                                                                                                                                                                                       | Reverse transcriptase domain [IPR000477] (1)                                                                                                                                                                                                                   | -                                | C_ushii_01385_mRNA_7.1     | -                           |
| GF004822 | 0                             | 1                       | 0                        | Hypothetical protein (1)                                                                                              |                                                                                                                                                                                                                                                                                                                                       | -                                                                                                                                                                                                                                                              | -                                | C_ushii_01385_mRNA_6.1     | -                           |
| GF004821 | 0                             | 1                       | 0                        | Hypothetical protein (1)                                                                                              | nucleotide binding [GO:0000166 molecular_function] (1)                                                                                                                                                                                                                                                                                | Domain of unknown function DUF4283 [IPR025558] (1); Nucleotide-binding alpha-beta plat domain [IPR012677] (1)                                                                                                                                                  | -                                | C_ushii_01385_mRNA_5.1     | -                           |
| GF004820 | 0                             | 1                       | 0                        | Hypothetical protein (1)                                                                                              |                                                                                                                                                                                                                                                                                                                                       | -                                                                                                                                                                                                                                                              | -                                | C_ushii_01385_mRNA_3.1     | -                           |
| GF004819 | 0                             | 1                       | 0                        | Hypothetical protein (1)                                                                                              |                                                                                                                                                                                                                                                                                                                                       | -                                                                                                                                                                                                                                                              | -                                | C_ushii_01384_mRNA_9.1     | -                           |
| GF004818 | 0                             | 1                       | 0                        | Hypothetical protein (1)                                                                                              |                                                                                                                                                                                                                                                                                                                                       | -                                                                                                                                                                                                                                                              | -                                | C_ushii_01384_mRNA_7.1     | -                           |
| GF004817 | 0                             | 1                       | 0                        | Hypothetical protein (1)                                                                                              |                                                                                                                                                                                                                                                                                                                                       | -                                                                                                                                                                                                                                                              | -                                | C_ushii_01384_mRNA_6.1     | -                           |
| GF004816 | 0                             | 1                       | 0                        | Hypothetical protein (1)                                                                                              |                                                                                                                                                                                                                                                                                                                                       | -                                                                                                                                                                                                                                                              | -                                | C_ushii_01384_mRNA_4.1     | -                           |
| GF004815 | 0                             | 1                       | 0                        | Hypothetical protein (1)                                                                                              |                                                                                                                                                                                                                                                                                                                                       | -                                                                                                                                                                                                                                                              | -                                | C_ushii_01384_mRNA_3.1     | -                           |
| GF004814 | 0                             | 1                       | 0                        | Hypothetical protein (1)                                                                                              |                                                                                                                                                                                                                                                                                                                                       | -                                                                                                                                                                                                                                                              | -                                | C_ushii_01384_mRNA_1.1     | -                           |
| GF004813 | 0                             | 1                       | 0                        | Hypothetical protein (1)                                                                                              |                                                                                                                                                                                                                                                                                                                                       | -                                                                                                                                                                                                                                                              | -                                | C_ushii_01383_mRNA_5.1     | -                           |
| GF004812 | 0                             | 1                       | 0                        | Truncated tyrosine decarboxylase (1)                                                                                  | carboxy-lyase activity [GO:0016831 molecular_function] (1); carboxylic acid metabolic process [GO:0003752 biological_process] (1); cellular amino acid metabolic process [GO:0006520 biological_process] (1); catalytic activity [GO:0003524 molecular_function] (1); pyridoxal phosphate binding [GO:0030170 molecular_function] (1) | Pyridoxal phosphate-dependent transferase, major region, subdomain 1 [IPR015421] (1); Pyridoxal phosphate-dependent decarboxylase [IPR02129] (1); Pyridoxal phosphate-dependent transferase [IPR015421] (1); Aspartate-L-lysine decarboxylase [IPR010977] (1)  | -                                | C_ushii_01382_mRNA_5.1     | -                           |
| GF004811 | 0                             | 1                       | 0                        | Hypothetical protein (1)                                                                                              |                                                                                                                                                                                                                                                                                                                                       | -                                                                                                                                                                                                                                                              | -                                | C_ushii_01382_mRNA_1.1     | -                           |
| GF004810 | 0                             | 1                       | 0                        | Hypothetical protein (1)                                                                                              |                                                                                                                                                                                                                                                                                                                                       | -                                                                                                                                                                                                                                                              | -                                | C_ushii_01381_mRNA_1.1     | -                           |
| GF004809 | 0                             | 1                       | 0                        | Nucleic acid binding / zinc ion binding protein (1)                                                                   | nucleic acid binding [GO:0003676 molecular_function] (1); zinc ion binding [GO:0008270 molecular_function] (1)                                                                                                                                                                                                                        | Domain of unknown function DUF4283 [IPR025558] (1); Zinc finger, CCHC-type [IPR01878] (1); Zinc knuckle CXXC/GAUGC [IPR028516] (1)                                                                                                                             | -                                | C_ushii_01380_mRNA_1.1     | -                           |
| GF004808 | 0                             | 1                       | 0                        | Putative non-LTR retroelement reverse transcriptase (1)                                                               |                                                                                                                                                                                                                                                                                                                                       | Reverse transcriptase domain [IPR000477] (1); Reverse transcriptase zinc-binding domain [IPR026960] (1); Domain of unknown function DUF4283 [IPR025558] (1)                                                                                                    | -                                | C_ushii_01379_mRNA_5.1     | -                           |
| GF004807 | 0                             | 1                       | 0                        | Hypothetical protein (1)                                                                                              |                                                                                                                                                                                                                                                                                                                                       | HAT-like domain [IPR023214] (1); FCP1 homology domain [IPR04274] (1)                                                                                                                                                                                           | -                                | C_ushii_01379_mRNA_3.1     | -                           |
| GF004806 | 0                             | 1                       | 0                        | Hypothetical protein (1)                                                                                              | zinc ion binding [GO:0008270 molecular_function] (1); nucleic acid binding [GO:0003676 molecular_function] (1)                                                                                                                                                                                                                        | Zinc finger, CCHC-type [IPR01878] (1)                                                                                                                                                                                                                          | -                                | C_ushii_01379_mRNA_2.1     | -                           |
| GF004805 | 0                             | 1                       | 0                        | Hypothetical protein (1)                                                                                              |                                                                                                                                                                                                                                                                                                                                       | -                                                                                                                                                                                                                                                              | -                                | C_ushii_01376_mRNA_6.1     | -                           |
| GF004804 | 0                             | 1                       | 0                        | Hypothetical protein (1)                                                                                              |                                                                                                                                                                                                                                                                                                                                       | -                                                                                                                                                                                                                                                              | -                                | C_ushii_01376_mRNA_4.1     | -                           |
| GF004803 | 0                             | 1                       | 0                        | Hypothetical protein (1)                                                                                              |                                                                                                                                                                                                                                                                                                                                       | -                                                                                                                                                                                                                                                              | -                                | C_ushii_01376_mRNA_1.1     | -                           |
| GF004802 | 0                             | 1                       | 0                        | Hypothetical protein (1)                                                                                              |                                                                                                                                                                                                                                                                                                                                       | -                                                                                                                                                                                                                                                              | -                                | C_ushii_01373_mRNA_1.1     | -                           |
| GF004801 | 0                             | 1                       | 0                        | Hypothetical protein (1)                                                                                              |                                                                                                                                                                                                                                                                                                                                       | -                                                                                                                                                                                                                                                              | -                                | C_ushii_01373_mRNA_6.1     | -                           |
| GF004800 | 0                             | 1                       | 0                        | Hypothetical protein (1)                                                                                              |                                                                                                                                                                                                                                                                                                                                       | -                                                                                                                                                                                                                                                              | -                                | C_ushii_01374_mRNA_3.1     | -                           |
| GF004799 | 0                             | 1                       | 0                        | Hypothetical protein (1)                                                                                              |                                                                                                                                                                                                                                                                                                                                       | -                                                                                                                                                                                                                                                              | -                                | C_ushii_01374_mRNA_1.1     | -                           |
| GF004798 | 0                             | 1                       | 0                        | Hypothetical protein (1)                                                                                              |                                                                                                                                                                                                                                                                                                                                       | -                                                                                                                                                                                                                                                              | -                                | C_ushii_01373_mRNA_5.1     | -                           |
| GF004797 | 0                             | 1                       | 0                        | Hypothetical protein (1)                                                                                              |                                                                                                                                                                                                                                                                                                                                       | -                                                                                                                                                                                                                                                              | -                                | C_ushii_01373_mRNA_1.1     | -                           |
| GF004796 | 0                             | 1                       | 0                        | Hypothetical protein (1)                                                                                              |                                                                                                                                                                                                                                                                                                                                       | -                                                                                                                                                                                                                                                              | -                                | C_ushii_01372_mRNA_7.1     | -                           |
| GF004795 | 0                             | 1                       | 0                        | Hypothetical protein (1)                                                                                              |                                                                                                                                                                                                                                                                                                                                       | -                                                                                                                                                                                                                                                              | -                                | C_ushii_01372_mRNA_4.1     | -                           |
| GF004794 | 0                             | 1                       | 0                        | Hypothetical protein (1)                                                                                              |                                                                                                                                                                                                                                                                                                                                       | -                                                                                                                                                                                                                                                              | -                                | C_ushii_01372_mRNA_3.1     | -                           |
| GF004793 | 0                             | 1                       | 0                        | Hypothetical protein (1)                                                                                              |                                                                                                                                                                                                                                                                                                                                       | -                                                                                                                                                                                                                                                              | -                                | C_ushii_01372_mRNA_1.1     | -                           |
| GF004792 | 0                             | 1                       | 0                        | Hypothetical protein (1)                                                                                              |                                                                                                                                                                                                                                                                                                                                       | -                                                                                                                                                                                                                                                              | -                                | C_ushii_01370_mRNA_8.1     | -                           |
| GF004791 | 0                             | 1                       | 0                        | Ubiquitin-conjugating enzyme E2 N (1)                                                                                 |                                                                                                                                                                                                                                                                                                                                       | Ubiquitin-conjugating enzyme/RWD-like [IPR01615] (1); Ubiquitin-conjugating enzyme, active site [IPR023131] (1); Ubiquitin-conjugating enzyme E2 [IPR006068] (1)                                                                                               | -                                | C_ushii_01369_mRNA_5.1     | -                           |
| GF004790 | 0                             | 1                       | 0                        | Hypothetical protein (1)                                                                                              |                                                                                                                                                                                                                                                                                                                                       | -                                                                                                                                                                                                                                                              | -                                | C_ushii_01368_mRNA_2.1     | -                           |
| GF004789 | 0                             | 1                       | 0                        | TAP42-like family protein, expressed (1)                                                                              | regulation of signal transduction [GO:0009866 biological_process] (1)                                                                                                                                                                                                                                                                 | TAP42-like protein [IPR07304] (1)                                                                                                                                                                                                                              | -                                | C_ushii_01368_mRNA_1.1     | -                           |
| GF004788 | 0                             | 1                       | 0                        | Hypothetical protein (1)                                                                                              |                                                                                                                                                                                                                                                                                                                                       | -                                                                                                                                                                                                                                                              | -                                | C_ushii_01367_mRNA_9.1     | -                           |
| GF004787 | 0                             | 1                       | 0                        | Hypothetical protein (1)                                                                                              | Ino80 complex [GO:0031011 cellular_component] (1)                                                                                                                                                                                                                                                                                     | Nuclear factor related to kappa-B-binding protein [IPR024867] (1)                                                                                                                                                                                              | -                                | C_ushii_01367_mRNA_6.1     | -                           |
| GF004786 | 0                             | 1                       | 0                        | Hypothetical protein (1)                                                                                              |                                                                                                                                                                                                                                                                                                                                       | -                                                                                                                                                                                                                                                              | -                                | C_ushii_01367_mRNA_5.1     | -                           |
| GF004785 | 0                             | 1                       | 0                        | Hypothetical protein (1)                                                                                              |                                                                                                                                                                                                                                                                                                                                       | Domain of unknown function DUF4283 [IPR025558] (1)                                                                                                                                                                                                             | -                                | C_ushii_01367_mRNA_3.1     | -                           |
| GF004784 | 0                             | 1                       | 0                        | IAT transposon superfamily (1)                                                                                        | zinc ion binding [GO:0008270 molecular_function] (1); protein dimerization activity [GO:0004983 molecular_function] (1); nucleic acid binding [GO:0003676 molecular_function] (1); oxidoreductase activity [GO:0016491 molecular_function] (1)                                                                                        | Domain of unknown function DUF659 [IPR007021] (1); Ribonuclease H-like domain [IPR02337] (1); Zinc finger, GZF-type [IPR010660] (1); IAT, C-terminal dimerization domain [IPR008060] (1)                                                                       | -                                | C_ushii_01367_mRNA_11.1    | -                           |
| GF004783 | 0                             | 1                       | 0                        | Type II peroxidoxin (1)                                                                                               |                                                                                                                                                                                                                                                                                                                                       | Redoxin [IPR01740] (1); Thioresonin-like fold [IPR012336] (1)                                                                                                                                                                                                  | -                                | C_ushii_01366_mRNA_5.1     | -                           |
| GF004782 | 0                             | 1                       | 0                        | ADP-ribosylation factor GTPase-activating protein AGD3 (1)                                                            | protein binding [GO:0005515 molecular_function] (1)                                                                                                                                                                                                                                                                                   | PH domain-like [IPR011995] (1); Peckstein homology domain [IPR01849] (1); Arkytin repeat-containing domain [IPR020683] (1); Arkytin homology (AH) domain/BAR domain [IPR027267] (1); Arkytin repeat [IPR02110] (1); Protein kinase-like domain [IPR011099] (1) | -                                | C_ushii_01366_mRNA_1.1     | -                           |
| GF004781 | 0                             | 1                       | 0                        | Hypothetical protein (1)                                                                                              |                                                                                                                                                                                                                                                                                                                                       | -                                                                                                                                                                                                                                                              | -                                | C_ushii_01365_mRNA_8.1     | -                           |
| GF004780 | 0                             | 1                       | 0                        | Nucleic acid binding protein, putative (1)                                                                            | nucleic acid binding [GO:0003676 molecular_function] (1)                                                                                                                                                                                                                                                                              | Ribonuclease H-like domain [IPR021237] (1)                                                                                                                                                                                                                     | -                                | C_ushii_01365_mRNA_7.1     | -                           |
| GF004779 | 0                             | 1                       | 0                        | Ribonuclease H protein, putative (1)                                                                                  |                                                                                                                                                                                                                                                                                                                                       | Reverse transcriptase zinc-binding domain [IPR026960] (1)                                                                                                                                                                                                      | -                                | C_ushii_01365_mRNA_6.1     | -                           |
| GF004778 | 0                             | 1                       | 0                        | Hypothetical protein (1)                                                                                              |                                                                                                                                                                                                                                                                                                                                       | -                                                                                                                                                                                                                                                              | -                                | C_ushii_01365_mRNA_5.1     | -                           |
| GF004777 | 0                             | 1                       | 0                        | Hypothetical protein (1)                                                                                              |                                                                                                                                                                                                                                                                                                                                       | -                                                                                                                                                                                                                                                              | -                                | C_ushii_01365_mRNA_1.1     | -                           |
| GF004776 | 0                             | 1                       | 0                        | Hypothetical protein (1)                                                                                              |                                                                                                                                                                                                                                                                                                                                       | Heat shock protein 70kD, peptide-binding domain [IPR029477] (1); Heat shock protein 70kD, C-terminal domain [IPR029048] (1); Heat shock protein 70 family [IPR013126] (1)                                                                                      | -                                | C_ushii_01364_mRNA_3.1     | -                           |

| ID        | Num. in C. crottensteini | Num. in C. auris | Num. in P. putida | Note                                                         | GO                                                                                                                                                                                                                                                                                                                                                                                    | InterPro                                                                                                                                                                                                                                                                                                                                                                                                       | Members in C. crottensteini | Members in C. auris     | Members in P. putida |
|-----------|--------------------------|------------------|-------------------|--------------------------------------------------------------|---------------------------------------------------------------------------------------------------------------------------------------------------------------------------------------------------------------------------------------------------------------------------------------------------------------------------------------------------------------------------------------|----------------------------------------------------------------------------------------------------------------------------------------------------------------------------------------------------------------------------------------------------------------------------------------------------------------------------------------------------------------------------------------------------------------|-----------------------------|-------------------------|----------------------|
| GF0040775 | 0                        | 1                | 0                 | Cytochrome P450 (1)                                          | heme binding [GO:002037 molecular_function] (1); iron ion binding [GO:005506 molecular_function] (1); oxidation-reduction process [GO:005514 biological_process] (1); cytochrome P450, conserved site [GO:0016705 molecular_function] (1)                                                                                                                                             | Cytochrome P450 [IPR01120] (1); Cytochrome P450, conserved site [IPR01792] (1)                                                                                                                                                                                                                                                                                                                                 | C_ushii_01364_mRNA_2.1      | -                       | -                    |
| GF0040774 | 0                        | 1                | 0                 | Hypothetical protein (1)                                     | oxidoreductase activity, acting on paired donors, with incorporation or reduction of molecular oxygen [GO:0016705 molecular_function] (1); oxidation-reduction process [GO:005514 biological_process] (1); iron ion binding [GO:005506 molecular_function] (1); heme binding [GO:002037 molecular_function] (1)                                                                       | Cytochrome P450, F-class, group I [IPR02401] (1); Cytochrome P450, conserved site [IPR01792] (1); Domain of unknown function DU1985 [IPR015410] (1); Cytochrome P450 [IPR01120] (1)                                                                                                                                                                                                                            | C_ushii_01363_mRNA_1.1      | -                       | -                    |
| GF0040773 | 0                        | 1                | 0                 | Hypothetical protein (1)                                     | -                                                                                                                                                                                                                                                                                                                                                                                     | -                                                                                                                                                                                                                                                                                                                                                                                                              | -                           | C_ushii_01360_mRNA_8.1  | -                    |
| GF0040772 | 0                        | 1                | 0                 | Putative RNA-directed DNA polymerase (1)                     | -                                                                                                                                                                                                                                                                                                                                                                                     | Reverse transcriptase zinc-binding domain [IPR026960] (1)                                                                                                                                                                                                                                                                                                                                                      | -                           | C_ushii_01360_mRNA_5.1  | -                    |
| GF0040771 | 0                        | 1                | 0                 | Hypothetical protein (1)                                     | -                                                                                                                                                                                                                                                                                                                                                                                     | -                                                                                                                                                                                                                                                                                                                                                                                                              | -                           | C_ushii_01360_mRNA_3.1  | -                    |
| GF0040770 | 0                        | 1                | 0                 | Hypothetical protein (1)                                     | -                                                                                                                                                                                                                                                                                                                                                                                     | -                                                                                                                                                                                                                                                                                                                                                                                                              | -                           | C_ushii_01360_mRNA_2.1  | -                    |
| GF0040769 | 0                        | 1                | 0                 | Hypothetical protein (1)                                     | -                                                                                                                                                                                                                                                                                                                                                                                     | -                                                                                                                                                                                                                                                                                                                                                                                                              | -                           | C_ushii_01360_mRNA_1.1  | -                    |
| GF0040768 | 0                        | 1                | 0                 | Hypothetical protein (1)                                     | -                                                                                                                                                                                                                                                                                                                                                                                     | -                                                                                                                                                                                                                                                                                                                                                                                                              | -                           | C_ushii_01359_mRNA_9.1  | -                    |
| GF0040767 | 0                        | 1                | 0                 | Hypothetical protein (1)                                     | ATPase activity [GO:0016887 molecular_function] (1); catalytic activity [GO:0003824 molecular_function] (1); trehalase metabolic process [GO:0005999 biological_process] (1); ATP binding [GO:0005224 molecular_function] (1); alpha,alpha-trehalase activity [GO:0004555 molecular_function] (1)                                                                                     | P-loop containing nucleoside triphosphate hydrolase [IPR023473] (1); AAA-ATPase domain [IPR003553] (1); ABC transporter-like [IPR003439] (1); ABC transporter, conserved site [IPR017871] (1); Six-hairpin glycoasidase-like [IPR009292] (1); Glycoside hydrolase, family 31, conserved site [IPR018232] (1); ABC-transporter extension domain [IPR012703] (1); Glycoside hydrolase, family 37 [IPR001661] (1) | C_ushii_01359_mRNA_8.1      | -                       |                      |
| GF0040766 | 0                        | 1                | 0                 | Carbon-nitrogen hydrolase family protein (1)                 | hydrolase activity, acting on carbon-nitrogen (but not peptide) bonds [GO:0016410 molecular_function] (1); NAD+ synthase (glutamine-hydrolyzing) activity [GO:0003952 molecular_function] (1); NAD biosynthetic process [GO:0009435 biological_process] (1); ATP binding [GO:0005224 molecular_function] (1); nitrogen compound metabolic process [GO:0006007 biological_process] (1) | NAD-GMP synthase [IPR022310] (1); Carbon-nitrogen hydrolase [IPR003010] (1); Rossmann-like alpha-beta-alpha sandwich fold [IPR014729] (1); NAD(+) synthetase [IPR03694] (1); Glutamine-dependent NAD(+) synthetase [IPR014445] (1)                                                                                                                                                                             | C_ushii_01359_mRNA_6.1      | -                       |                      |
| GF0040765 | 0                        | 1                | 0                 | Importin subunit beta-1 (1)                                  | Ran GTPase binding [GO:0008536 molecular_function] (1); protein transporter activity [GO:0008065 molecular_function] (1); intracellular protein transport [GO:0006886 biological_process] (1); binding [GO:0005488 molecular_function] (1); nucleocytoplasmic transport [GO:0006913 biological_process] (1)                                                                           | Armadillo-like helical [IPR011989] (1); Importin-beta, N-terminal domain [IPR001494] (1); Importin subunit beta-1, plant [IPR027401] (1); Armadillo-type fold [IPR016024] (1)                                                                                                                                                                                                                                  | C_ushii_01359_mRNA_4.1      | -                       |                      |
| GF0040764 | 0                        | 1                | 0                 | Short-chain dehydrogenase TIC 32 (1)                         | metabolic process [GO:0008152 biological_process] (1); oxidoreductase activity [GO:0016481 molecular_function] (1)                                                                                                                                                                                                                                                                    | Short-chain dehydrogenase/reductase SDR [IPR002190] (1); Glucosylated dehydrogenase [IPR023247] (1); NAD(P)-binding domain [IPR016040] (1)                                                                                                                                                                                                                                                                     | C_ushii_01359_mRNA_10.1     | -                       |                      |
| GF0040763 | 0                        | 1                | 0                 | Hypothetical protein (1)                                     | -                                                                                                                                                                                                                                                                                                                                                                                     | -                                                                                                                                                                                                                                                                                                                                                                                                              | -                           | C_ushii_01359_mRNA_1.1  | -                    |
| GF0040762 | 0                        | 1                | 0                 | Hypothetical protein (1)                                     | -                                                                                                                                                                                                                                                                                                                                                                                     | -                                                                                                                                                                                                                                                                                                                                                                                                              | -                           | C_ushii_01358_mRNA_4.1  | -                    |
| GF0040761 | 0                        | 1                | 0                 | Hypothetical protein (1)                                     | -                                                                                                                                                                                                                                                                                                                                                                                     | -                                                                                                                                                                                                                                                                                                                                                                                                              | -                           | C_ushii_01357_mRNA_8.1  | -                    |
| GF0040760 | 0                        | 1                | 0                 | Histone H3 (1)                                               | nucleosome [GO:0000786 cellular_component] (1); protein heterodimerization activity [GO:0046092 molecular_function] (1); DNA binding [GO:0003677 molecular_function] (1)                                                                                                                                                                                                              | Histone-fold [IPR009072] (1); Histone H3CENP-A [IPR001641] (1); Histone H2A-H2B-H3 [IPR007125] (1)                                                                                                                                                                                                                                                                                                             | C_ushii_01357_mRNA_6.1      | -                       |                      |
| GF0040759 | 0                        | 1                | 0                 | Hypothetical protein (1)                                     | -                                                                                                                                                                                                                                                                                                                                                                                     | Viral movement protein [IPR028919] (1)                                                                                                                                                                                                                                                                                                                                                                         | -                           | C_ushii_01357_mRNA_2.1  | -                    |
| GF0040758 | 0                        | 1                | 0                 | Hypothetical protein (1)                                     | endopeptidase inhibitor activity [GO:0004866 molecular_function] (1)                                                                                                                                                                                                                                                                                                                  | Proteinase inhibitor I3, Kunitz legume [IPR001661] (1); Kunitz inhibitor S11-like [IPR011065] (1)                                                                                                                                                                                                                                                                                                              | -                           | C_ushii_01357_mRNA_10.1 | -                    |
| GF0040757 | 0                        | 1                | 0                 | Hypothetical protein (1)                                     | nucleic acid binding [GO:0003676 molecular_function] (1)                                                                                                                                                                                                                                                                                                                              | Ribonuclease H-like domain [IPR012337] (1)                                                                                                                                                                                                                                                                                                                                                                     | -                           | C_ushii_01356_mRNA_3.1  | -                    |
| GF0040756 | 0                        | 1                | 0                 | Hypothetical protein (1)                                     | -                                                                                                                                                                                                                                                                                                                                                                                     | -                                                                                                                                                                                                                                                                                                                                                                                                              | -                           | C_ushii_01356_mRNA_2.1  | -                    |
| GF0040755 | 0                        | 1                | 0                 | Hypothetical protein (1)                                     | -                                                                                                                                                                                                                                                                                                                                                                                     | -                                                                                                                                                                                                                                                                                                                                                                                                              | -                           | C_ushii_01355_mRNA_4.1  | -                    |
| GF0040754 | 0                        | 1                | 0                 | Fascin-like AGP 15 family protein (1)                        | -                                                                                                                                                                                                                                                                                                                                                                                     | FAS1 domain [IPR007082] (1)                                                                                                                                                                                                                                                                                                                                                                                    | -                           | C_ushii_01354_mRNA_9.1  | -                    |
| GF0040753 | 0                        | 1                | 0                 | Syntaxin of plants protein (1)                               | protein binding [GO:0005515 molecular_function] (1); membrane [GO:0016020 cellular_component] (1); intracellular protein transport [GO:0006886 biological_process] (1); SNAP receptor activity [GO:0005484 molecular_function] (1)                                                                                                                                                    | Syntaxin/epsin/rapin, conserved site [IPR001214] (1); Target SNARE-1/evad-1 coil homology domain [IPR007072] (1)                                                                                                                                                                                                                                                                                               | C_ushii_01354_mRNA_4.1      | -                       |                      |
| GF0040752 | 0                        | 1                | 0                 | Hypothetical protein (1)                                     | -                                                                                                                                                                                                                                                                                                                                                                                     | -                                                                                                                                                                                                                                                                                                                                                                                                              | -                           | C_ushii_01354_mRNA_3.1  | -                    |
| GF0040751 | 0                        | 1                | 0                 | Ubiquitin thioesterase OTU1 (1)                              | -                                                                                                                                                                                                                                                                                                                                                                                     | -                                                                                                                                                                                                                                                                                                                                                                                                              | -                           | C_ushii_01352_mRNA_4.1  | -                    |
| GF0040750 | 0                        | 1                | 0                 | Hypothetical protein (1)                                     | -                                                                                                                                                                                                                                                                                                                                                                                     | -                                                                                                                                                                                                                                                                                                                                                                                                              | -                           | C_ushii_01351_mRNA_7.1  | -                    |
| GF0040749 | 0                        | 1                | 0                 | Hypothetical protein (1)                                     | -                                                                                                                                                                                                                                                                                                                                                                                     | -                                                                                                                                                                                                                                                                                                                                                                                                              | -                           | C_ushii_01351_mRNA_6.1  | -                    |
| GF0040748 | 0                        | 1                | 0                 | Hypothetical protein (1)                                     | -                                                                                                                                                                                                                                                                                                                                                                                     | -                                                                                                                                                                                                                                                                                                                                                                                                              | -                           | C_ushii_01351_mRNA_1.1  | -                    |
| GF0040747 | 0                        | 1                | 0                 | Glutathione S-transferase, amino-terminal domain protein (1) | protein binding [GO:0005515 molecular_function] (1)                                                                                                                                                                                                                                                                                                                                   | Glutathione S-transferase, N-terminal [IPR004045] (1); Glutathione S-transferase, C-terminal-like [IPR010987] (1); Thioesterase-like fold [IPR012336] (1)                                                                                                                                                                                                                                                      | -                           | C_ushii_01350_mRNA_8.1  | -                    |
| GF0040746 | 0                        | 1                | 0                 | Hypothetical protein (1)                                     | protein binding [GO:0005515 molecular_function] (1)                                                                                                                                                                                                                                                                                                                                   | Leucine-rich repeat [IPR001611] (1); Leucine-rich repeat domain, L domain-like [IPR02675] (1); Uncharacterized protein family F00234 [IPR001851] (1); Leucine-rich repeat domain, L domain-like [IPR02675] (1)                                                                                                                                                                                                 | -                           | C_ushii_01350_mRNA_6.1  | -                    |
| GF0040745 | 0                        | 1                | 0                 | Hypothetical protein (1)                                     | -                                                                                                                                                                                                                                                                                                                                                                                     | Domain of unknown function DUF239 [IPR004313] (1); Domain of unknown function DUF449 [IPR025211] (1)                                                                                                                                                                                                                                                                                                           | -                           | C_ushii_01350_mRNA_4.1  | -                    |
| GF0040744 | 0                        | 1                | 0                 | TRNA-splicing ligase RscB (1)                                | Protein of unknown function DUF247, plant [IPR004158] (1)                                                                                                                                                                                                                                                                                                                             | -                                                                                                                                                                                                                                                                                                                                                                                                              | -                           | C_ushii_01348_mRNA_10.1 | -                    |
| GF0040743 | 0                        | 1                | 0                 | Hypothetical protein (1)                                     | -                                                                                                                                                                                                                                                                                                                                                                                     | -                                                                                                                                                                                                                                                                                                                                                                                                              | -                           | C_ushii_01348_mRNA_1.1  | -                    |
| GF0040742 | 0                        | 1                | 0                 | Hypothetical protein (1)                                     | -                                                                                                                                                                                                                                                                                                                                                                                     | Leucine-rich repeat-containing N-terminal, plant-type [IPR013210] (1)                                                                                                                                                                                                                                                                                                                                          | -                           | C_ushii_01347_mRNA_1.1  | -                    |
| GF0040741 | 0                        | 1                | 0                 | Hypothetical protein (1)                                     | -                                                                                                                                                                                                                                                                                                                                                                                     | Viral movement protein [IPR028919] (1)                                                                                                                                                                                                                                                                                                                                                                         | -                           | C_ushii_01347_mRNA_6.1  | -                    |
| GF0040740 | 0                        | 1                | 0                 | Hypothetical protein (1)                                     | -                                                                                                                                                                                                                                                                                                                                                                                     | -                                                                                                                                                                                                                                                                                                                                                                                                              | -                           | C_ushii_01347_mRNA_5.1  | -                    |
| GF0040739 | 0                        | 1                | 0                 | Hypothetical protein (1)                                     | -                                                                                                                                                                                                                                                                                                                                                                                     | Viral movement protein [IPR028919] (1)                                                                                                                                                                                                                                                                                                                                                                         | -                           | C_ushii_01347_mRNA_3.1  | -                    |
| GF0040738 | 0                        | 1                | 0                 | Hypothetical protein (1)                                     | -                                                                                                                                                                                                                                                                                                                                                                                     | -                                                                                                                                                                                                                                                                                                                                                                                                              | -                           | C_ushii_01347_mRNA_1.1  | -                    |
| GF0040737 | 0                        | 1                | 0                 | Hypothetical protein (1)                                     | -                                                                                                                                                                                                                                                                                                                                                                                     | -                                                                                                                                                                                                                                                                                                                                                                                                              | -                           | C_ushii_01346_mRNA_1.1  | -                    |
| GF0040736 | 0                        | 1                | 0                 | Hypothetical protein (1)                                     | -                                                                                                                                                                                                                                                                                                                                                                                     | -                                                                                                                                                                                                                                                                                                                                                                                                              | -                           | C_ushii_01344_mRNA_9.1  | -                    |
| GF0040735 | 0                        | 1                | 0                 | Hypothetical protein (1)                                     | -                                                                                                                                                                                                                                                                                                                                                                                     | Zinc knuckle CXC4HX4C [IPR028560] (1); Domain of unknown function DUF4283 [IPR025558] (1)                                                                                                                                                                                                                                                                                                                      | -                           | C_ushii_01344_mRNA_2.1  | -                    |
| GF0040734 | 0                        | 1                | 0                 | Hypothetical protein (1)                                     | -                                                                                                                                                                                                                                                                                                                                                                                     | -                                                                                                                                                                                                                                                                                                                                                                                                              | -                           | C_ushii_01344_mRNA_13.1 | -                    |
| GF0040733 | 0                        | 1                | 0                 | Hypothetical protein (1)                                     | regulation of transcription, DNA-templated [GO:0006355 biological_process] (1)                                                                                                                                                                                                                                                                                                        | FHY3/FAR1 family [IPR011052] (1)                                                                                                                                                                                                                                                                                                                                                                               | -                           | C_ushii_01344_mRNA_11.1 | -                    |
| GF0040732 | 0                        | 1                | 0                 | Hypothetical protein (1)                                     | regulation of transcription, DNA-templated [GO:0006355 biological_process] (1)                                                                                                                                                                                                                                                                                                        | FHY3/FAR1 family [IPR011052] (1); FAR1 DNA binding domain [IPR004330] (1)                                                                                                                                                                                                                                                                                                                                      | -                           | C_ushii_01344_mRNA_10.1 | -                    |
| GF0040731 | 0                        | 1                | 0                 | Hypothetical protein (1)                                     | -                                                                                                                                                                                                                                                                                                                                                                                     | -                                                                                                                                                                                                                                                                                                                                                                                                              | -                           | C_ushii_01344_mRNA_1.1  | -                    |
| GF0040730 | 0                        | 1                | 0                 | Hypothetical protein (1)                                     | -                                                                                                                                                                                                                                                                                                                                                                                     | Viral movement protein [IPR028919] (1)                                                                                                                                                                                                                                                                                                                                                                         | -                           | C_ushii_01343_mRNA_9.1  | -                    |
| GF0040729 | 0                        | 1                | 0                 | Hypothetical protein (1)                                     | -                                                                                                                                                                                                                                                                                                                                                                                     | -                                                                                                                                                                                                                                                                                                                                                                                                              | -                           | C_ushii_01343_mRNA_7.1  | -                    |
| GF0040728 | 0                        | 1                | 0                 | Hypothetical protein (1)                                     | -                                                                                                                                                                                                                                                                                                                                                                                     | Viral movement protein [IPR028919] (1)                                                                                                                                                                                                                                                                                                                                                                         | -                           | C_ushii_01343_mRNA_14.1 | -                    |
| GF0040727 | 0                        | 1                | 0                 | Hypothetical protein (1)                                     | -                                                                                                                                                                                                                                                                                                                                                                                     | -                                                                                                                                                                                                                                                                                                                                                                                                              | -                           | C_ushii_01343_mRNA_12.1 | -                    |
| GF0040726 | 0                        | 1                | 0                 | Hypothetical protein (1)                                     | -                                                                                                                                                                                                                                                                                                                                                                                     | -                                                                                                                                                                                                                                                                                                                                                                                                              | -                           | C_ushii_01343_mRNA_10.1 | -                    |
| GF0040725 | 0                        | 1                | 0                 | Hypothetical protein (1)                                     | -                                                                                                                                                                                                                                                                                                                                                                                     | -                                                                                                                                                                                                                                                                                                                                                                                                              | -                           | C_ushii_01342_mRNA_9.1  | -                    |
| GF0040724 | 0                        | 1                | 0                 | Hypothetical protein (1)                                     | -                                                                                                                                                                                                                                                                                                                                                                                     | -                                                                                                                                                                                                                                                                                                                                                                                                              | -                           | C_ushii_01342_mRNA_8.1  | -                    |
| GF0040723 | 0                        | 1                | 0                 | Tether containing UBX domain for GLUT4, putative (1)         | -                                                                                                                                                                                                                                                                                                                                                                                     | -                                                                                                                                                                                                                                                                                                                                                                                                              | -                           | C_ushii_01342_mRNA_1.1  | -                    |
| GF0040722 | 0                        | 1                | 0                 | Hypothetical protein (1)                                     | -                                                                                                                                                                                                                                                                                                                                                                                     | -                                                                                                                                                                                                                                                                                                                                                                                                              | -                           | C_ushii_01341_mRNA_1.1  | -                    |
| GF0040721 | 0                        | 1                | 0                 | Hypothetical protein (1)                                     | -                                                                                                                                                                                                                                                                                                                                                                                     | -                                                                                                                                                                                                                                                                                                                                                                                                              | -                           | C_ushii_01340_mRNA_4.1  | -                    |
| GF0040720 | 0                        | 1                | 0                 | Hypothetical protein (1)                                     | -                                                                                                                                                                                                                                                                                                                                                                                     | -                                                                                                                                                                                                                                                                                                                                                                                                              | -                           | C_ushii_01340_mRNA_3.1  | -                    |
| GF0040719 | 0                        | 1                | 0                 | Hypothetical protein (1)                                     | -                                                                                                                                                                                                                                                                                                                                                                                     | -                                                                                                                                                                                                                                                                                                                                                                                                              | -                           | C_ushii_01340_mRNA_2.1  | -                    |
| GF0040718 | 0                        | 1                | 0                 | Hypothetical protein (1)                                     | -                                                                                                                                                                                                                                                                                                                                                                                     | -                                                                                                                                                                                                                                                                                                                                                                                                              | -                           | C_ushii_01340_mRNA_1.1  | -                    |
| GF0040717 | 0                        | 1                | 0                 | Hypothetical protein (1)                                     | nucleic acid binding [GO:0003676 molecular_function] (1); RNA binding [GO:0003723 molecular_function] (1); tlc base-pairing process [GO:0005484 biological_process] (1); tlc base-pairing process [GO:0006189 biological_process] (1)                                                                                                                                                 | K Homology domain [IPR004087] (1); Phosphoribosylamidoimidazole carboxylase Purf domain [IPR000031] (1); K Homology domain, type 1 [IPR004088] (1)                                                                                                                                                                                                                                                             | C_ushii_01339_mRNA_7.1      | -                       |                      |
| GF0040716 | 0                        | 1                | 0                 | Hypothetical protein (1)                                     | -                                                                                                                                                                                                                                                                                                                                                                                     | -                                                                                                                                                                                                                                                                                                                                                                                                              | -                           | C_ushii_01339_mRNA_6.1  | -                    |
| GF0040715 | 0                        | 1                | 0                 | Hypothetical protein (1)                                     | nucleic acid binding [GO:0003676 molecular_function] (1); DNA binding [GO:0003677 molecular_function] (1)                                                                                                                                                                                                                                                                             | Zinc finger, BED-type [IPR003650] (1); Ribonuclease H-like domain [IPR012337] (1)                                                                                                                                                                                                                                                                                                                              | -                           | C_ushii_01339_mRNA_5.1  | -                    |
| GF0040714 | 0                        | 1                | 0                 | Zinc knuckle family protein (1)                              | -                                                                                                                                                                                                                                                                                                                                                                                     | Zinc finger, CCHC-type [IPR001878] (1)                                                                                                                                                                                                                                                                                                                                                                         | -                           | C_ushii_01339_mRNA_4.1  | -                    |
| GF0040713 | 0                        | 1                | 0                 | Hypothetical protein (1)                                     | -                                                                                                                                                                                                                                                                                                                                                                                     | -                                                                                                                                                                                                                                                                                                                                                                                                              | -                           | C_ushii_01339_mRNA_2.1  | -                    |
| GF0040712 | 0                        | 1                | 0                 | Putative protease Do-like 14 (1)                             | serine-type endopeptidase activity [GO:0004352 molecular_function] (1); proteolysis [GO:0006008 biological_process] (1); protein binding [GO:0005515 molecular_function] (1)                                                                                                                                                                                                          | Peptidase S1, PA clan [IPR009003] (1); PDZ domain [IPR001478] (1); Peptidase S1C [IPR001940] (1)                                                                                                                                                                                                                                                                                                               | -                           | C_ushii_01339_mRNA_1.1  |                      |
| GF0040711 | 0                        | 1                | 0                 | Hypothetical protein (1)                                     | cysteine-type peptidase activity [GO:0008234 molecular_function] (1); proteolysis [GO:0006008 biological_process] (1)                                                                                                                                                                                                                                                                 | Ulp1 protease family, C-terminal catalytic domain [IPR003653] (1)                                                                                                                                                                                                                                                                                                                                              | -                           | C_ushii_01338_mRNA_7.1  | -                    |
| GF0040710 | 0                        | 1                | 0                 | Hypothetical protein (1)                                     | nucleic acid binding [GO:0003676 molecular_function] (1); zinc ion binding [GO:0008270 molecular_function] (1)                                                                                                                                                                                                                                                                        | Zinc finger, CCHC-type [IPR001878] (1)                                                                                                                                                                                                                                                                                                                                                                         | -                           | C_ushii_01338_mRNA_6.1  | -                    |
| GF0040709 | 0                        | 1                | 0                 | Hypothetical protein (1)                                     | -                                                                                                                                                                                                                                                                                                                                                                                     | -                                                                                                                                                                                                                                                                                                                                                                                                              | -                           | C_ushii_01338_mRNA_5.1  | -                    |

| ID       | Num. in C. crottensteii | Num. in C. auris | Num. in P. putidus | Name                                                       | GO                                                                                                                                                                                                                                                                                                                                                                                                                                                                                  | InterPro                                                                                                                                                                                                                                       | Members in C. crottensteii | Members in C. auris     | Members in P. putidus |
|----------|-------------------------|------------------|--------------------|------------------------------------------------------------|-------------------------------------------------------------------------------------------------------------------------------------------------------------------------------------------------------------------------------------------------------------------------------------------------------------------------------------------------------------------------------------------------------------------------------------------------------------------------------------|------------------------------------------------------------------------------------------------------------------------------------------------------------------------------------------------------------------------------------------------|----------------------------|-------------------------|-----------------------|
| GF004708 | 0                       | 1                | 0                  | Hypothetical protein (1)                                   | zinc ion binding [GO:0008270 molecular_function] (1); metal ion binding [GO:0003676 molecular_function] (1)                                                                                                                                                                                                                                                                                                                                                                         | Zinc finger, CCHC-type [IPR001878] (1); Reverse transcriptase domain [IPR00477] (1)                                                                                                                                                            | -                          | C_ushii_01338_mRNA_2,1  | -                     |
| GF004707 | 0                       | 1                | 0                  | Hypothetical protein (1)                                   | zinc ion binding [GO:0008270 molecular_function] (1); metal ion binding [GO:0003676 molecular_function] (1)                                                                                                                                                                                                                                                                                                                                                                         | Zinc finger, CCHC-type [IPR001878] (1); Reverse transcriptase domain [IPR00477] (1)                                                                                                                                                            | -                          | C_ushii_01338_mRNA_1,1  | -                     |
| GF004706 | 0                       | 1                | 0                  | Hypothetical protein (1)                                   | DNA binding [GO:0003677 molecular_function] (1)                                                                                                                                                                                                                                                                                                                                                                                                                                     | DNA-binding pseudobarrel domain [IPR015300] (1); B3 DNA binding domain [IPR00340] (1); Protein of unknown function DUF1313 [IPR009741] (4)                                                                                                     | -                          | C_ushii_01337_mRNA_1,1  | -                     |
| GF004705 | 0                       | 1                | 0                  | Hypothetical protein (1)                                   |                                                                                                                                                                                                                                                                                                                                                                                                                                                                                     | Reverse transcriptase domain [IPR00477] (4)                                                                                                                                                                                                    | -                          | C_ushii_01336_mRNA_5,1  | -                     |
| GF004704 | 0                       | 1                | 0                  | Hypothetical protein (1)                                   |                                                                                                                                                                                                                                                                                                                                                                                                                                                                                     | Reverse transcriptase domain [IPR00477] (4)                                                                                                                                                                                                    | -                          | C_ushii_01336_mRNA_2,1  | -                     |
| GF004703 | 0                       | 1                | 0                  | Hypothetical protein (1)                                   |                                                                                                                                                                                                                                                                                                                                                                                                                                                                                     | Reverse transcriptase domain [IPR00477] (4)                                                                                                                                                                                                    | -                          | C_ushii_01336_mRNA_10,1 | -                     |
| GF004702 | 0                       | 1                | 0                  | Hypothetical protein (1)                                   |                                                                                                                                                                                                                                                                                                                                                                                                                                                                                     | Pre-mRNA-splicing factor 19 [IPR013915] (1)                                                                                                                                                                                                    | -                          | C_ushii_01335_mRNA_3,1  | -                     |
| GF004701 | 0                       | 1                | 0                  | Hypothetical protein (1)                                   | catalytic activity [GO:0003824 molecular_function] (1)                                                                                                                                                                                                                                                                                                                                                                                                                              | PF1B repeat [IPR001330] (1); Topoisomerase cytosine-protein phosphotransferase alpha-tosoid [IPR008930] (1)                                                                                                                                    | -                          | C_ushii_01335_mRNA_1,1  | -                     |
| GF004700 | 0                       | 1                | 0                  | Hypothetical protein (1)                                   |                                                                                                                                                                                                                                                                                                                                                                                                                                                                                     |                                                                                                                                                                                                                                                | -                          | C_ushii_01334_mRNA_2,1  | -                     |
| GF004699 | 0                       | 1                | 0                  | Hypothetical protein (1)                                   |                                                                                                                                                                                                                                                                                                                                                                                                                                                                                     |                                                                                                                                                                                                                                                | -                          | C_ushii_01332_mRNA_7,1  | -                     |
| GF004698 | 0                       | 1                | 0                  | Hypothetical protein (1)                                   |                                                                                                                                                                                                                                                                                                                                                                                                                                                                                     |                                                                                                                                                                                                                                                | -                          | C_ushii_01333_mRNA_5,1  | -                     |
| GF004697 | 0                       | 1                | 0                  | Hypothetical protein (1)                                   |                                                                                                                                                                                                                                                                                                                                                                                                                                                                                     |                                                                                                                                                                                                                                                | -                          | C_ushii_01333_mRNA_3,1  | -                     |
| GF004696 | 0                       | 1                | 0                  | Hypothetical protein (1)                                   |                                                                                                                                                                                                                                                                                                                                                                                                                                                                                     |                                                                                                                                                                                                                                                | -                          | C_ushii_01333_mRNA_2,1  | -                     |
| GF004695 | 0                       | 1                | 0                  | Hypothetical protein (1)                                   |                                                                                                                                                                                                                                                                                                                                                                                                                                                                                     |                                                                                                                                                                                                                                                | -                          | C_ushii_01333_mRNA_1,1  | -                     |
| GF004694 | 0                       | 1                | 0                  | Hypothetical protein (1)                                   |                                                                                                                                                                                                                                                                                                                                                                                                                                                                                     |                                                                                                                                                                                                                                                | -                          | C_ushii_01332_mRNA_9,1  | -                     |
| GF004693 | 0                       | 1                | 0                  | Hypothetical protein (1)                                   |                                                                                                                                                                                                                                                                                                                                                                                                                                                                                     |                                                                                                                                                                                                                                                | -                          | C_ushii_01332_mRNA_8,1  | -                     |
| GF004692 | 0                       | 1                | 0                  | Hypothetical protein (1)                                   |                                                                                                                                                                                                                                                                                                                                                                                                                                                                                     |                                                                                                                                                                                                                                                | -                          | C_ushii_01332_mRNA_7,1  | -                     |
| GF004691 | 0                       | 1                | 0                  | Hypothetical protein (1)                                   |                                                                                                                                                                                                                                                                                                                                                                                                                                                                                     |                                                                                                                                                                                                                                                | -                          | C_ushii_01332_mRNA_6,1  | -                     |
| GF004690 | 0                       | 1                | 0                  | Hypothetical protein (1)                                   |                                                                                                                                                                                                                                                                                                                                                                                                                                                                                     |                                                                                                                                                                                                                                                | -                          | C_ushii_01331_mRNA_7,1  | -                     |
| GF004689 | 0                       | 1                | 0                  | Hypothetical protein (1)                                   |                                                                                                                                                                                                                                                                                                                                                                                                                                                                                     |                                                                                                                                                                                                                                                | -                          | C_ushii_01331_mRNA_1,1  | -                     |
| GF004688 | 0                       | 1                | 0                  | Hypothetical protein (1)                                   |                                                                                                                                                                                                                                                                                                                                                                                                                                                                                     |                                                                                                                                                                                                                                                | -                          | C_ushii_01330_mRNA_6,1  | -                     |
| GF004687 | 0                       | 1                | 0                  | Hypothetical protein (1)                                   |                                                                                                                                                                                                                                                                                                                                                                                                                                                                                     | Domain unknown function DUF295 [IPR005174] (1)                                                                                                                                                                                                 | -                          | C_ushii_01329_mRNA_1,1  | -                     |
| GF004686 | 0                       | 1                | 0                  | Hypothetical protein (1)                                   | oxidation-reduction process [GO:005514 biological_process] (1); metal ion binding [GO:0046872 molecular_function] (1); superoxide metabolic process [GO:000601 biological_process] (1)                                                                                                                                                                                                                                                                                              | Superoxide dismutase, copper/zinc binding domain [IPR001424] (1)                                                                                                                                                                               | -                          | C_ushii_01327_mRNA_4,1  | -                     |
| GF004685 | 0                       | 1                | 0                  | Hypothetical protein (1)                                   |                                                                                                                                                                                                                                                                                                                                                                                                                                                                                     |                                                                                                                                                                                                                                                | -                          | C_ushii_01327_mRNA_3,1  | -                     |
| GF004684 | 0                       | 1                | 0                  | Hypothetical protein (1)                                   |                                                                                                                                                                                                                                                                                                                                                                                                                                                                                     |                                                                                                                                                                                                                                                | -                          | C_ushii_01327_mRNA_1,1  | -                     |
| GF004683 | 0                       | 1                | 0                  | Hypothetical protein (1)                                   | cysteine-type peptidase activity [GO:0008234 molecular_function] (1); proteolysis [GO:0006508 biological_process] (1)                                                                                                                                                                                                                                                                                                                                                               | Ulp1 protease family, C-terminal catalytic domain [IPR003453] (1)                                                                                                                                                                              | -                          | C_ushii_01326_mRNA_5,1  | -                     |
| GF004682 | 0                       | 1                | 0                  | Hypothetical protein (1)                                   |                                                                                                                                                                                                                                                                                                                                                                                                                                                                                     |                                                                                                                                                                                                                                                | -                          | C_ushii_01326_mRNA_4,1  | -                     |
| GF004681 | 0                       | 1                | 0                  | Hypothetical protein (1)                                   |                                                                                                                                                                                                                                                                                                                                                                                                                                                                                     |                                                                                                                                                                                                                                                | -                          | C_ushii_01326_mRNA_2,1  | -                     |
| GF004680 | 0                       | 1                | 0                  | Hypothetical protein (1)                                   |                                                                                                                                                                                                                                                                                                                                                                                                                                                                                     | EERI/EHBP1 N-terminal domain [IPR019448] (1)                                                                                                                                                                                                   | -                          | C_ushii_01325_mRNA_9,1  | -                     |
| GF004679 | 0                       | 1                | 0                  | Putative mtdR family transposase-like (1)                  | zinc ion binding [GO:0008270 molecular_function] (1); metal ion binding [GO:0003676 molecular_function] (1)                                                                                                                                                                                                                                                                                                                                                                         | MULE transposase domain [IPR018209] (1); Zinc finger, DMZ-type [IPR008564] (1); Zinc finger, SWIM-type [IPR007527] (1); Zinc finger, CCHC-type [IPR001878] (1)                                                                                 | -                          | C_ushii_01325_mRNA_2,1  | -                     |
| GF004678 | 0                       | 1                | 0                  | Hypothetical protein (1)                                   | heme binding [GO:0020037 molecular_function] (1); response to oxidative stress [GO:0006979 biological_process] (1); peroxidase activity [GO:0004601 molecular_function] (1); oxidation-reduction process [GO:005514 biological_process] (1)                                                                                                                                                                                                                                         | Hem peroxidase, plant/fungal/bacterial [IPR020161] (1); Plant peroxidase [IPR008023] (1); Hem peroxidase [IPR010255] (1)                                                                                                                       | -                          | C_ushii_01324_mRNA_1,1  | -                     |
| GF004677 | 0                       | 1                | 0                  | Hypothetical protein (1)                                   |                                                                                                                                                                                                                                                                                                                                                                                                                                                                                     |                                                                                                                                                                                                                                                | -                          | C_ushii_01323_mRNA_8,1  | -                     |
| GF004676 | 0                       | 1                | 0                  | Hypothetical protein (1)                                   |                                                                                                                                                                                                                                                                                                                                                                                                                                                                                     | Domain of unknown function DUF4005 [IPR025064] (1); Gag polyprotein of LTR copia-type [IPR029472] (1)                                                                                                                                          | -                          | C_ushii_01323_mRNA_7,1  | -                     |
| GF004675 | 0                       | 1                | 0                  | Hypothetical protein (1)                                   |                                                                                                                                                                                                                                                                                                                                                                                                                                                                                     |                                                                                                                                                                                                                                                | -                          | C_ushii_01323_mRNA_6,1  | -                     |
| GF004674 | 0                       | 1                | 0                  | Hypothetical protein (1)                                   |                                                                                                                                                                                                                                                                                                                                                                                                                                                                                     |                                                                                                                                                                                                                                                | -                          | C_ushii_01323_mRNA_5,1  | -                     |
| GF004673 | 0                       | 1                | 0                  | Hypothetical protein (1)                                   | metal ion binding [GO:0003676 molecular_function] (1)                                                                                                                                                                                                                                                                                                                                                                                                                               | Ribonuclease H-like domain [IPR012337] (1)                                                                                                                                                                                                     | -                          | C_ushii_01323_mRNA_10,1 | -                     |
| GF004672 | 0                       | 1                | 0                  | Hypothetical protein (1)                                   |                                                                                                                                                                                                                                                                                                                                                                                                                                                                                     |                                                                                                                                                                                                                                                | -                          | C_ushii_01322_mRNA_8,1  | -                     |
| GF004671 | 0                       | 1                | 0                  | Hypothetical protein (1)                                   |                                                                                                                                                                                                                                                                                                                                                                                                                                                                                     |                                                                                                                                                                                                                                                | -                          | C_ushii_01322_mRNA_5,1  | -                     |
| GF004670 | 0                       | 1                | 0                  | Hypothetical protein (1)                                   |                                                                                                                                                                                                                                                                                                                                                                                                                                                                                     | Retron/insertion gag domain [IPR005162] (1)                                                                                                                                                                                                    | -                          | C_ushii_01322_mRNA_3,1  | -                     |
| GF004669 | 0                       | 1                | 0                  | Peroxidase 4 (1)                                           | oxidation-reduction process [GO:005514 biological_process] (1); peroxidase activity [GO:0004601 molecular_function] (1); response to oxidative stress [GO:0006979 biological_process] (1); heme binding [GO:0020037 molecular_function] (1); aspartic-type endopeptidase activity [GO:0004190 molecular_function] (1); zinc ion binding [GO:0008270 molecular_function] (1); proteolysis [GO:0006508 biological_process] (1); metal ion binding [GO:0003676 molecular_function] (1) | Hem peroxidase [IPR010255] (1); Peroxidase, active site [IPR019794] (1); Plant peroxidase [IPR008023] (1); Hem peroxidase, plant/fungal/bacterial [IPR020161] (1)                                                                              | -                          | C_ushii_01322_mRNA_1,1  | -                     |
| GF004668 | 0                       | 1                | 0                  | Hypothetical protein (1)                                   | zinc ion binding [GO:0008270 molecular_function] (1); proteolysis [GO:0006508 biological_process] (1); metal ion binding [GO:0003676 molecular_function] (1)                                                                                                                                                                                                                                                                                                                        | Zinc finger, CCHC-type [IPR001878] (1); Viral movement protein [IPR028919] (1); Aspartic peptidase, active site [IPR001960] (1)                                                                                                                | -                          | C_ushii_01321_mRNA_5,1  | -                     |
| GF004667 | 0                       | 1                | 0                  | Hypothetical protein (1)                                   |                                                                                                                                                                                                                                                                                                                                                                                                                                                                                     |                                                                                                                                                                                                                                                | -                          | C_ushii_01321_mRNA_4,1  | -                     |
| GF004666 | 0                       | 1                | 0                  | Desiccation-induced IVOC superfamily protein (1)           |                                                                                                                                                                                                                                                                                                                                                                                                                                                                                     | Glyoxalase/Bleomycin resistance protein/Dihydroxyphenyl dioxygenase [IPR029068] (1); Glyoxalase-like domain [IPR025870] (4)                                                                                                                    | -                          | C_ushii_01320_mRNA_9,1  | -                     |
| GF004665 | 0                       | 1                | 0                  | Hypothetical protein (1)                                   |                                                                                                                                                                                                                                                                                                                                                                                                                                                                                     |                                                                                                                                                                                                                                                | -                          | C_ushii_01320_mRNA_8,1  | -                     |
| GF004664 | 0                       | 1                | 0                  | Pathogenesis-related thumatin family protein (1)           |                                                                                                                                                                                                                                                                                                                                                                                                                                                                                     | Thaumatin [IPR001938] (1)                                                                                                                                                                                                                      | -                          | C_ushii_01320_mRNA_5,1  | -                     |
| GF004663 | 0                       | 1                | 0                  | Hypothetical protein (1)                                   |                                                                                                                                                                                                                                                                                                                                                                                                                                                                                     |                                                                                                                                                                                                                                                | -                          | C_ushii_01320_mRNA_13,1 | -                     |
| GF004662 | 0                       | 1                | 0                  | Heat shock protein 70 (1)                                  |                                                                                                                                                                                                                                                                                                                                                                                                                                                                                     | Heat shock protein 70kD, C-terminal domain [IPR029048] (1); Heat shock protein 70 family [IPR013120] (1); Heat shock protein 70 conserved site [IPR018181] (4); Heat shock protein 70kD, repeat-binding domain [IPR029047] (1)                 | -                          | C_ushii_01320_mRNA_1,1  | -                     |
| GF004661 | 0                       | 1                | 0                  | Hypothetical protein (1)                                   |                                                                                                                                                                                                                                                                                                                                                                                                                                                                                     |                                                                                                                                                                                                                                                | -                          | C_ushii_01319_mRNA_8,1  | -                     |
| GF004660 | 0                       | 1                | 0                  | Hypothetical protein (1)                                   |                                                                                                                                                                                                                                                                                                                                                                                                                                                                                     |                                                                                                                                                                                                                                                | -                          | C_ushii_01319_mRNA_6,1  | -                     |
| GF004659 | 0                       | 1                | 0                  | Disease resistance protein (1)                             | ADP binding [GO:0043531 molecular_function] (1)                                                                                                                                                                                                                                                                                                                                                                                                                                     | NB-ARC [IPR02182] (1); P-loop containing nucleoside triphosphate hydrolase [IPR027417] (4)                                                                                                                                                     | -                          | C_ushii_01319_mRNA_1,1  | -                     |
| GF004658 | 0                       | 1                | 0                  | Disease resistance family protein / LRR family protein (1) | protein binding [GO:0005515 molecular_function] (1)                                                                                                                                                                                                                                                                                                                                                                                                                                 | Leucine-rich repeat domain, L domain-like [IPR02675] (1); Leucine-rich repeat-containing N-terminal, plant-type [IPR012310] (1); Leucine-rich repeat [IPR01611] (1)                                                                            | -                          | C_ushii_01318_mRNA_13,1 | -                     |
| GF004657 | 0                       | 1                | 0                  | Hypothetical protein (1)                                   |                                                                                                                                                                                                                                                                                                                                                                                                                                                                                     |                                                                                                                                                                                                                                                | -                          | C_ushii_01317_mRNA_3,1  | -                     |
| GF004656 | 0                       | 1                | 0                  | Hypothetical protein (1)                                   |                                                                                                                                                                                                                                                                                                                                                                                                                                                                                     |                                                                                                                                                                                                                                                | -                          | C_ushii_01316_mRNA_1,1  | -                     |
| GF004655 | 0                       | 1                | 0                  | ABA 8'-hydroxylase (1)                                     | oxidation-reduction process [GO:005514 biological_process] (1); oxidoreductase activity, acting on paired donors, with incorporation or reduction of molecular oxygen [GO:0016705 molecular_function] (1); iron ion binding [GO:0005506 molecular_function] (1); heme binding [GO:0020037 molecular_function] (1)                                                                                                                                                                   | Cytochrome P450 [IPR001128] (1); Cytochrome P450, F-like, group I [IPR002401] (1); Cytochrome P450, conserved site [IPR017972] (1)                                                                                                             | -                          | C_ushii_01315_mRNA_5,1  | -                     |
| GF004654 | 0                       | 1                | 0                  | Protein CYP804 (1)                                         | protein binding [GO:0005515 molecular_function] (1)                                                                                                                                                                                                                                                                                                                                                                                                                                 | Vacuolar import/degredation, Vsl27-related [IPR013863] (1); WD40/YVTN repeat-like containing domain [IPR015943] (1)                                                                                                                            | -                          | C_ushii_01315_mRNA_1,1  | -                     |
| GF004653 | 0                       | 1                | 0                  | Hypothetical protein (1)                                   |                                                                                                                                                                                                                                                                                                                                                                                                                                                                                     |                                                                                                                                                                                                                                                | -                          | C_ushii_01314_mRNA_4,1  | -                     |
| GF004652 | 0                       | 1                | 0                  | Hypothetical protein (1)                                   |                                                                                                                                                                                                                                                                                                                                                                                                                                                                                     |                                                                                                                                                                                                                                                | -                          | C_ushii_01313_mRNA_9,1  | -                     |
| GF004651 | 0                       | 1                | 0                  | Hypothetical protein (1)                                   |                                                                                                                                                                                                                                                                                                                                                                                                                                                                                     |                                                                                                                                                                                                                                                | -                          | C_ushii_01313_mRNA_8,1  | -                     |
| GF004650 | 0                       | 1                | 0                  | Hypothetical protein (1)                                   |                                                                                                                                                                                                                                                                                                                                                                                                                                                                                     |                                                                                                                                                                                                                                                | -                          | C_ushii_01313_mRNA_6,1  | -                     |
| GF004649 | 0                       | 1                | 0                  | Hypothetical protein (1)                                   |                                                                                                                                                                                                                                                                                                                                                                                                                                                                                     |                                                                                                                                                                                                                                                | -                          | C_ushii_01313_mRNA_4,1  | -                     |
| GF004648 | 0                       | 1                | 0                  | Hypothetical protein (1)                                   |                                                                                                                                                                                                                                                                                                                                                                                                                                                                                     |                                                                                                                                                                                                                                                | -                          | C_ushii_01313_mRNA_10,1 | -                     |
| GF004647 | 0                       | 1                | 0                  | Hypothetical protein (1)                                   | microtubule motor activity [GO:0003777 molecular_function] (1); microtubule-based movement [GO:0007018 biological_process] (1); protein binding [GO:0005515 molecular_function] (1); microtubule binding [GO:0098017 molecular_function] (1); ATP binding [GO:0005524 molecular_function] (1)                                                                                                                                                                                       | P-loop containing nucleoside triphosphate hydrolase [IPR027417] (1); Calponin homology domain [IPR00175] (1); Kinesin motor domain [IPR001752] (1); Kinesin motor domain, conserved site [IPR019821] (1); Kinesin-like protein [IPR027640] (1) | -                          | C_ushii_01313_mRNA_1,1  | -                     |
| GF004646 | 0                       | 1                | 0                  | Hypothetical protein (1)                                   |                                                                                                                                                                                                                                                                                                                                                                                                                                                                                     |                                                                                                                                                                                                                                                | -                          | C_ushii_01311_mRNA_1,1  | -                     |
| GF004645 | 0                       | 1                | 0                  | Hypothetical protein (1)                                   | membrane [GO:0016020 cellular_component] (1); acetylglucosaminyltransferase activity [GO:0008375 molecular_function] (1)                                                                                                                                                                                                                                                                                                                                                            | Glycosyl transferase, family 14 [IPR003406] (1)                                                                                                                                                                                                | -                          | C_ushii_01310_mRNA_8,1  | -                     |
| GF004644 | 0                       | 1                | 0                  | Hypothetical protein (1)                                   |                                                                                                                                                                                                                                                                                                                                                                                                                                                                                     | LOG family [IPR031100] (1)                                                                                                                                                                                                                     | -                          | C_ushii_01310_mRNA_4,1  | -                     |
| GF004643 | 0                       | 1                | 0                  | Hypothetical protein (1)                                   |                                                                                                                                                                                                                                                                                                                                                                                                                                                                                     | Reverse transcriptase, RNA-dependent DNA polymerase [IPR013103] (1)                                                                                                                                                                            | -                          | C_ushii_01310_mRNA_2,1  | -                     |
| GF004642 | 0                       | 1                | 0                  | Hypothetical protein (1)                                   |                                                                                                                                                                                                                                                                                                                                                                                                                                                                                     |                                                                                                                                                                                                                                                | -                          | C_ushii_01310_mRNA_1,1  | -                     |
| GF004641 | 0                       | 1                | 0                  | Hypothetical protein (1)                                   |                                                                                                                                                                                                                                                                                                                                                                                                                                                                                     |                                                                                                                                                                                                                                                | -                          | C_ushii_01309_mRNA_7,1  | -                     |
| GF004640 | 0                       | 1                | 0                  | Hypothetical protein (1)                                   | FAD binding [GO:0071949 molecular_function] (1)                                                                                                                                                                                                                                                                                                                                                                                                                                     | FAD-binding domain [IPR002938] (1)                                                                                                                                                                                                             | -                          | C_ushii_01309_mRNA_3,1  | -                     |
| GF004639 | 0                       | 1                | 0                  | Hypothetical protein (1)                                   |                                                                                                                                                                                                                                                                                                                                                                                                                                                                                     |                                                                                                                                                                                                                                                | -                          | C_ushii_01309_mRNA_2,1  | -                     |
| GF004638 | 0                       | 1                | 0                  | Hypothetical protein (1)                                   | transmembrane transport [GO:0055085 biological_process] (1); metal ion transmembrane transport activity [GO:0046873 molecular_function] (1); metal ion transport [GO:0030001 biological_process] (1); membrane [GO:0016020 cellular_component] (1)                                                                                                                                                                                                                                  | Zinc/iron permease [IPR003689] (1)                                                                                                                                                                                                             | -                          | C_ushii_01309_mRNA_1,1  | -                     |
| GF004637 | 0                       | 1                | 0                  | Hypothetical protein (1)                                   |                                                                                                                                                                                                                                                                                                                                                                                                                                                                                     |                                                                                                                                                                                                                                                | -                          | C_ushii_01308_mRNA_7,1  | -                     |

| ID        | Num. in C. crottenstei | Num. in C. auris | Num. in P. putida | Note                                                    | GO                                                                                                                                                                                                                                                                                                                                                                                                    | InterPro                                                                                                                                                                                                                                                                                          | Members in C. crottenstei | Members in C. auris     | Members in P. putida |
|-----------|------------------------|------------------|-------------------|---------------------------------------------------------|-------------------------------------------------------------------------------------------------------------------------------------------------------------------------------------------------------------------------------------------------------------------------------------------------------------------------------------------------------------------------------------------------------|---------------------------------------------------------------------------------------------------------------------------------------------------------------------------------------------------------------------------------------------------------------------------------------------------|---------------------------|-------------------------|----------------------|
| GF0040636 | 0                      | 1                | 0                 | Hypothetical protein (1)                                | hydrolase activity [GO:0016787]<br>molecular_function (1); protein<br>dimerization activity [GO:0046983]<br>molecular_function (1); nucleic acid<br>binding [GO:0003676]<br>molecular_function (1)                                                                                                                                                                                                    | Ribonuclease H-like domain [IPR012337]<br>(1); HAT, C-terminal dimerization domain<br>[IPR009860] (1); NUDIX hydrolase<br>domain [IPR000086] (1); NUDIX<br>hydrolase domain-like [IPR015797] (1)                                                                                                  | -                         | C_ushii_01308_mRNA_5,1  | -                    |
| GF0040635 | 0                      | 1                | 0                 | Hypothetical protein (1)                                | nucleic acid binding [GO:0003676]<br>molecular_function (1); RNA binding<br>[GO:0003723 molecular_function (1)                                                                                                                                                                                                                                                                                        | K Homology domain [IPR004087] (1); K<br>Homology domain, type 1 [IPR004088]<br>(1)                                                                                                                                                                                                                | -                         | C_ushii_01308_mRNA_10,1 | -                    |
| GF0040634 | 0                      | 1                | 0                 | Hypothetical protein (1)                                | -                                                                                                                                                                                                                                                                                                                                                                                                     | -                                                                                                                                                                                                                                                                                                 | -                         | C_ushii_01308_mRNA_1,1  | -                    |
| GF0040633 | 0                      | 1                | 0                 | Hypothetical protein (1)                                | -                                                                                                                                                                                                                                                                                                                                                                                                     | -                                                                                                                                                                                                                                                                                                 | -                         | C_ushii_01307_mRNA_5,1  | -                    |
| GF0040632 | 0                      | 1                | 0                 | Hypothetical protein (1)                                | -                                                                                                                                                                                                                                                                                                                                                                                                     | -                                                                                                                                                                                                                                                                                                 | -                         | C_ushii_01306_mRNA_9,1  | -                    |
| GF0040631 | 0                      | 1                | 0                 | Hypothetical protein (1)                                | -                                                                                                                                                                                                                                                                                                                                                                                                     | -                                                                                                                                                                                                                                                                                                 | -                         | C_ushii_01306_mRNA_5,1  | -                    |
| GF0040630 | 0                      | 1                | 0                 | Hypothetical protein (1)                                | -                                                                                                                                                                                                                                                                                                                                                                                                     | -                                                                                                                                                                                                                                                                                                 | -                         | C_ushii_01306_mRNA_4,1  | -                    |
| GF0040629 | 0                      | 1                | 0                 | Hypothetical protein (1)                                | -                                                                                                                                                                                                                                                                                                                                                                                                     | -                                                                                                                                                                                                                                                                                                 | -                         | C_ushii_01306_mRNA_1,1  | -                    |
| GF0040628 | 0                      | 1                | 0                 | Hypothetical protein (1)                                | serine-type peptidase activity<br>[GO:0002020 molecular_function (1)];<br>proteolysis [GO:0006508<br>biological_process (1)                                                                                                                                                                                                                                                                           | Peptidase S28 [IPR008758] (1)                                                                                                                                                                                                                                                                     | -                         | C_ushii_01305_mRNA_5,1  | -                    |
| GF0040627 | 0                      | 1                | 0                 | Hypothetical protein (1)                                | -                                                                                                                                                                                                                                                                                                                                                                                                     | -                                                                                                                                                                                                                                                                                                 | -                         | C_ushii_01304_mRNA_4,1  | -                    |
| GF0040626 | 0                      | 1                | 0                 | Hypothetical protein (1)                                | -                                                                                                                                                                                                                                                                                                                                                                                                     | -                                                                                                                                                                                                                                                                                                 | -                         | C_ushii_01304_mRNA_2,1  | -                    |
| GF0040625 | 0                      | 1                | 0                 | Hypothetical protein (1)                                | -                                                                                                                                                                                                                                                                                                                                                                                                     | -                                                                                                                                                                                                                                                                                                 | -                         | C_ushii_01304_mRNA_1,1  | -                    |
| GF0040624 | 0                      | 1                | 0                 | ATIG5750 protein (1)                                    | heme binding [GO:0020037<br>molecular_function (1)]; iron ion binding<br>[GO:0005506 molecular_function (1)];<br>oxidation-reduction process [GO:0055114<br>biological_process (1)]; oxidoreductase<br>activity, acting on paired donors, with<br>incorporation or reduction of molecular<br>oxygen [GO:0016765<br>molecular_function (1)                                                             | Cytochrome P450 [IPR01128] (1);<br>Cytochrome P450, E-class, group I<br>[IPR024011] (1)                                                                                                                                                                                                           | -                         | C_ushii_01303_mRNA_8,1  | -                    |
| GF0040623 | 0                      | 1                | 0                 | Hypothetical protein (1)                                | oxidoreductase activity, acting on paired<br>donors, with incorporation or reduction of<br>molecular oxygen [GO:0016765<br>molecular_function (1)]; oxidation-<br>reduction process [GO:0055114<br>biological_process (1)]; heme binding<br>[GO:0020037 molecular_function (1)];<br>iron ion binding [GO:0005506<br>molecular_function (1)                                                            | Cytochrome P450 [IPR01128] (1)                                                                                                                                                                                                                                                                    | -                         | C_ushii_01303_mRNA_7,1  | -                    |
| GF0040622 | 0                      | 1                | 0                 | Hypothetical protein (1)                                | oxidoreductase activity, acting on paired<br>donors, with incorporation or reduction of<br>molecular oxygen [GO:0016765<br>molecular_function (1)]; oxidation-<br>reduction process [GO:0055114<br>biological_process (1)]; iron ion binding<br>[GO:0005506 molecular_function (1)];<br>heme binding [GO:0020037<br>molecular_function (1)                                                            | Cytochrome P450 [IPR01128] (1)                                                                                                                                                                                                                                                                    | -                         | C_ushii_01303_mRNA_5,1  | -                    |
| GF0040621 | 0                      | 1                | 0                 | Hypothetical protein (1)                                | oxidoreductase activity, acting on paired<br>donors, with incorporation or reduction of<br>molecular oxygen [GO:0016765<br>molecular_function (1)]; oxidation-<br>reduction process [GO:0055114<br>biological_process (1)]; iron ion binding<br>[GO:0005506 molecular_function (1)];<br>heme binding [GO:0020037<br>molecular_function (1)                                                            | Cytochrome P450 [IPR01128] (1)                                                                                                                                                                                                                                                                    | -                         | C_ushii_01303_mRNA_4,1  | -                    |
| GF0040620 | 0                      | 1                | 0                 | Hypothetical protein (1)                                | oxidoreductase activity, acting on paired<br>donors, with incorporation or reduction of<br>molecular oxygen [GO:0016765<br>molecular_function (1)]; heme binding<br>[GO:0020037 molecular_function (1)];<br>iron ion binding [GO:0005506<br>molecular_function (1)                                                                                                                                    | Cytochrome P450 [IPR01128] (1);<br>Cytochrome P450, conserved site<br>[IPR017922] (1)                                                                                                                                                                                                             | -                         | C_ushii_01303_mRNA_3,1  | -                    |
| GF0040619 | 0                      | 1                | 0                 | Hypothetical protein (1)                                | -                                                                                                                                                                                                                                                                                                                                                                                                     | -                                                                                                                                                                                                                                                                                                 | -                         | C_ushii_01303_mRNA_11,3 | -                    |
| GF0040618 | 0                      | 1                | 0                 | Hypothetical protein (1)                                | -                                                                                                                                                                                                                                                                                                                                                                                                     | -                                                                                                                                                                                                                                                                                                 | -                         | C_ushii_01303_mRNA_10,1 | -                    |
| GF0040617 | 0                      | 1                | 0                 | Hypothetical protein (1)                                | -                                                                                                                                                                                                                                                                                                                                                                                                     | -                                                                                                                                                                                                                                                                                                 | -                         | C_ushii_01302_mRNA_7,1  | -                    |
| GF0040616 | 0                      | 1                | 0                 | Hypothetical protein (1)                                | -                                                                                                                                                                                                                                                                                                                                                                                                     | -                                                                                                                                                                                                                                                                                                 | -                         | C_ushii_01302_mRNA_4,1  | -                    |
| GF0040615 | 0                      | 1                | 0                 | Hypothetical protein (1)                                | -                                                                                                                                                                                                                                                                                                                                                                                                     | -                                                                                                                                                                                                                                                                                                 | -                         | C_ushii_01302_mRNA_11,3 | -                    |
| GF0040614 | 0                      | 1                | 0                 | Hypothetical protein (1)                                | -                                                                                                                                                                                                                                                                                                                                                                                                     | -                                                                                                                                                                                                                                                                                                 | -                         | C_ushii_01301_mRNA_5,1  | -                    |
| GF0040613 | 0                      | 1                | 0                 | Hypothetical protein (1)                                | -                                                                                                                                                                                                                                                                                                                                                                                                     | -                                                                                                                                                                                                                                                                                                 | -                         | C_ushii_01301_mRNA_4,1  | -                    |
| GF0040612 | 0                      | 1                | 0                 | Hypothetical protein (1)                                | -                                                                                                                                                                                                                                                                                                                                                                                                     | -                                                                                                                                                                                                                                                                                                 | -                         | C_ushii_01301_mRNA_3,1  | -                    |
| GF0040611 | 0                      | 1                | 0                 | Hypothetical protein (1)                                | -                                                                                                                                                                                                                                                                                                                                                                                                     | -                                                                                                                                                                                                                                                                                                 | -                         | C_ushii_01301_mRNA_1,1  | -                    |
| GF0040610 | 0                      | 1                | 0                 | Hypothetical protein (1)                                | -                                                                                                                                                                                                                                                                                                                                                                                                     | -                                                                                                                                                                                                                                                                                                 | -                         | C_ushii_01300_mRNA_6,1  | -                    |
| GF0040609 | 0                      | 1                | 0                 | Hypothetical protein (1)                                | nucleic acid binding [GO:0003676]<br>molecular_function (1); zinc ion binding<br>[GO:0008270 molecular_function (1)                                                                                                                                                                                                                                                                                   | Zinc finger, CCHC-type [IPR018178] (1)                                                                                                                                                                                                                                                            | -                         | C_ushii_01300_mRNA_1,1  | -                    |
| GF0040608 | 0                      | 1                | 0                 | Hypothetical protein (1)                                | -                                                                                                                                                                                                                                                                                                                                                                                                     | -                                                                                                                                                                                                                                                                                                 | -                         | C_ushii_01299_mRNA_5,1  | -                    |
| GF0040607 | 0                      | 1                | 0                 | Hypothetical protein (1)                                | -                                                                                                                                                                                                                                                                                                                                                                                                     | -                                                                                                                                                                                                                                                                                                 | -                         | C_ushii_01299_mRNA_13,3 | -                    |
| GF0040606 | 0                      | 1                | 0                 | Monosaccharide transport protein (1)                    | -                                                                                                                                                                                                                                                                                                                                                                                                     | -                                                                                                                                                                                                                                                                                                 | -                         | C_ushii_01299_mRNA_12,3 | -                    |
| GF0040605 | 0                      | 1                | 0                 | Hypothetical protein (1)                                | -                                                                                                                                                                                                                                                                                                                                                                                                     | -                                                                                                                                                                                                                                                                                                 | -                         | C_ushii_01298_mRNA_9,1  | -                    |
| GF0040604 | 0                      | 1                | 0                 | RnaeH protein (1)                                       | nucleic acid binding [GO:0003676]<br>molecular_function (1)                                                                                                                                                                                                                                                                                                                                           | Ribonuclease H-like domain [IPR012337]<br>(1)                                                                                                                                                                                                                                                     | -                         | C_ushii_01298_mRNA_11,3 | -                    |
| GF0040603 | 0                      | 1                | 0                 | ATP-dependent RNA helicase (1)                          | nucleic acid binding [GO:0003676]<br>molecular_function (1); ATP binding<br>[GO:0005524 molecular_function (1)                                                                                                                                                                                                                                                                                        | Helicase superfamily 1/2, ATP-binding<br>domain [IPR014001] (1); RNA helixase,<br>DEAD-box type, Q motif [IPR014014]<br>(1); P-loop containing nucleoside<br>triphosphate hydrolase [IPR023177] (1);<br>DEAD-DEAH box helicase domain<br>[IPR011548] (1); Helicase, C-terminal<br>[IPR001690] (1) | -                         | C_ushii_01298_mRNA_1,1  | -                    |
| GF0040602 | 0                      | 1                | 0                 | Hypothetical protein (1)                                | -                                                                                                                                                                                                                                                                                                                                                                                                     | -                                                                                                                                                                                                                                                                                                 | -                         | C_ushii_01296_mRNA_7,1  | -                    |
| GF0040601 | 0                      | 1                | 0                 | Hypothetical protein (1)                                | -                                                                                                                                                                                                                                                                                                                                                                                                     | -                                                                                                                                                                                                                                                                                                 | -                         | C_ushii_01296_mRNA_5,1  | -                    |
| GF0040600 | 0                      | 1                | 0                 | Hypothetical protein (1)                                | -                                                                                                                                                                                                                                                                                                                                                                                                     | -                                                                                                                                                                                                                                                                                                 | -                         | C_ushii_01296_mRNA_4,1  | -                    |
| GF0040599 | 0                      | 1                | 0                 | Hypothetical protein (1)                                | -                                                                                                                                                                                                                                                                                                                                                                                                     | -                                                                                                                                                                                                                                                                                                 | -                         | C_ushii_01296_mRNA_1,1  | -                    |
| GF0040598 | 0                      | 1                | 0                 | Hypothetical protein (1)                                | -                                                                                                                                                                                                                                                                                                                                                                                                     | -                                                                                                                                                                                                                                                                                                 | -                         | C_ushii_01295_mRNA_8,1  | -                    |
| GF0040597 | 0                      | 1                | 0                 | Hypothetical protein (1)                                | -                                                                                                                                                                                                                                                                                                                                                                                                     | -                                                                                                                                                                                                                                                                                                 | -                         | C_ushii_01295_mRNA_7,1  | -                    |
| GF0040596 | 0                      | 1                | 0                 | Hypothetical protein (1)                                | -                                                                                                                                                                                                                                                                                                                                                                                                     | -                                                                                                                                                                                                                                                                                                 | -                         | C_ushii_01294_mRNA_3,1  | -                    |
| GF0040595 | 0                      | 1                | 0                 | Hypothetical protein (1)                                | -                                                                                                                                                                                                                                                                                                                                                                                                     | -                                                                                                                                                                                                                                                                                                 | -                         | C_ushii_01293_mRNA_5,1  | -                    |
| GF0040594 | 0                      | 1                | 0                 | Hypothetical protein (1)                                | -                                                                                                                                                                                                                                                                                                                                                                                                     | -                                                                                                                                                                                                                                                                                                 | -                         | C_ushii_01293_mRNA_4,1  | -                    |
| GF0040593 | 0                      | 1                | 0                 | Hypothetical protein (1)                                | -                                                                                                                                                                                                                                                                                                                                                                                                     | -                                                                                                                                                                                                                                                                                                 | -                         | C_ushii_01293_mRNA_3,1  | -                    |
| GF0040592 | 0                      | 1                | 0                 | Hypothetical protein (1)                                | -                                                                                                                                                                                                                                                                                                                                                                                                     | -                                                                                                                                                                                                                                                                                                 | -                         | C_ushii_01293_mRNA_10,1 | -                    |
| GF0040591 | 0                      | 1                | 0                 | Hypothetical protein (1)                                | -                                                                                                                                                                                                                                                                                                                                                                                                     | -                                                                                                                                                                                                                                                                                                 | -                         | C_ushii_01292_mRNA_4,1  | -                    |
| GF0040590 | 0                      | 1                | 0                 | LRR and NB-ARC domain disease<br>resistance protein (1) | ADP binding [GO:0048351<br>molecular_function (1)                                                                                                                                                                                                                                                                                                                                                     | Leucine-rich repeat domain, L domain-<br>like [IPR025731] (1); NB-ARC<br>[IPR02182] (1); P-loop containing<br>nucleoside triphosphate hydrolase<br>[IPR027417] (1)                                                                                                                                | -                         | C_ushii_01292_mRNA_3,1  | -                    |
| GF0040589 | 0                      | 1                | 0                 | Hypothetical protein (1)                                | -                                                                                                                                                                                                                                                                                                                                                                                                     | -                                                                                                                                                                                                                                                                                                 | -                         | C_ushii_01290_mRNA_4,1  | -                    |
| GF0040588 | 0                      | 1                | 0                 | Hypothetical protein (1)                                | -                                                                                                                                                                                                                                                                                                                                                                                                     | -                                                                                                                                                                                                                                                                                                 | -                         | C_ushii_01288_mRNA_3,1  | -                    |
| GF0040587 | 0                      | 1                | 0                 | Hypothetical protein (1)                                | -                                                                                                                                                                                                                                                                                                                                                                                                     | -                                                                                                                                                                                                                                                                                                 | -                         | C_ushii_01287_mRNA_7,1  | -                    |
| GF0040586 | 0                      | 1                | 0                 | Hypothetical protein (1)                                | -                                                                                                                                                                                                                                                                                                                                                                                                     | -                                                                                                                                                                                                                                                                                                 | -                         | C_ushii_01287_mRNA_5,1  | -                    |
| GF0040585 | 0                      | 1                | 0                 | Hypothetical protein (1)                                | -                                                                                                                                                                                                                                                                                                                                                                                                     | -                                                                                                                                                                                                                                                                                                 | -                         | C_ushii_01287_mRNA_3,1  | -                    |
| GF0040584 | 0                      | 1                | 0                 | Hypothetical protein (1)                                | heme binding [GO:0020037<br>molecular_function (1)]; protein binding<br>[GO:0005514 molecular_function (1)];<br>iron ion binding [GO:0005506<br>molecular_function (1)]; oxidation-<br>reduction process [GO:0055114<br>biological_process (1)]; oxidoreductase<br>activity, acting on paired donors, with<br>incorporation or reduction of molecular<br>oxygen [GO:0016765<br>molecular_function (1) | Cytochrome P450, E-class, group I<br>[IPR024011] (1); Cytochrome P450,<br>conserved site [IPR017922] (1); F-box<br>domain [IPR001410] (1); Leucine-rich<br>repeat domain, L domain-like<br>[IPR025731] (1); Cytochrome P450<br>[IPR01128] (1)                                                     | -                         | C_ushii_01287_mRNA_2,1  | -                    |
| GF0040583 | 0                      | 1                | 0                 | Hypothetical protein (1)                                | -                                                                                                                                                                                                                                                                                                                                                                                                     | -                                                                                                                                                                                                                                                                                                 | -                         | C_ushii_01286_mRNA_6,1  | -                    |
| GF0040582 | 0                      | 1                | 0                 | Hypothetical protein (1)                                | -                                                                                                                                                                                                                                                                                                                                                                                                     | -                                                                                                                                                                                                                                                                                                 | -                         | C_ushii_01286_mRNA_3,1  | -                    |
| GF0040581 | 0                      | 1                | 0                 | Hypothetical protein (1)                                | -                                                                                                                                                                                                                                                                                                                                                                                                     | -                                                                                                                                                                                                                                                                                                 | -                         | C_ushii_01285_mRNA_7,1  | -                    |
| GF0040580 | 0                      | 1                | 0                 | Hypothetical protein (1)                                | -                                                                                                                                                                                                                                                                                                                                                                                                     | -                                                                                                                                                                                                                                                                                                 | -                         | C_ushii_01284_mRNA_4,1  | -                    |
| GF0040579 | 0                      | 1                | 0                 | Hypothetical protein (1)                                | -                                                                                                                                                                                                                                                                                                                                                                                                     | -                                                                                                                                                                                                                                                                                                 | -                         | C_ushii_01284_mRNA_3,1  | -                    |
| GF0040578 | 0                      | 1                | 0                 | Hypothetical protein (1)                                | protein transport [GO:0015031<br>biological_process (1)]; GTP binding<br>[GO:0005524 molecular_function (1)];<br>small GTPase mediated signal<br>transduction [GO:0007264<br>biological_process (1)                                                                                                                                                                                                   | Small GTPase superfamily [IPR001306]<br>(1); P-loop containing nucleoside<br>triphosphate hydrolase [IPR027417] (1);<br>Small GTPase superfamily, Rab-type<br>[IPR03579] (1)                                                                                                                      | -                         | C_ushii_01284_mRNA_17,1 | -                    |
| GF0040577 | 0                      | 1                | 0                 | Hypothetical protein (1)                                | -                                                                                                                                                                                                                                                                                                                                                                                                     | -                                                                                                                                                                                                                                                                                                 | -                         | C_ushii_01284_mRNA_1,1  | -                    |
| GF0040576 | 0                      | 1                | 0                 | Hypothetical protein (1)                                | -                                                                                                                                                                                                                                                                                                                                                                                                     | -                                                                                                                                                                                                                                                                                                 | -                         | C_ushii_01283_mRNA_3,1  | -                    |
| GF0040575 | 0                      | 1                | 0                 | Hypothetical protein (1)                                | phosphatidylinositol 4-phosphatase/5-phosphatase<br>[GO:004656 biological_process (1)];<br>protein binding [GO:0005515<br>molecular_function (1)                                                                                                                                                                                                                                                      | Inositol polyphosphate-related<br>phosphatase [IPR000300] (1); PIP2-like<br>[IPR008862] (1); WD40/VEN repeat-<br>like-containing domain [IPR015941] (1);<br>WD40 repeat-containing domain<br>[IPR017981] (1);<br>Endonuclease/exonuclease/phosphatase<br>[IPR05135] (1)                           | -                         | C_ushii_01283_mRNA_10,1 | -                    |
| GF0040574 | 0                      | 1                | 0                 | Hypothetical protein (1)                                | -                                                                                                                                                                                                                                                                                                                                                                                                     | -                                                                                                                                                                                                                                                                                                 | -                         | C_ushii_01282_mRNA_7,1  | -                    |
| GF0040573 | 0                      | 1                | 0                 | Hypothetical protein (1)                                | -                                                                                                                                                                                                                                                                                                                                                                                                     | -                                                                                                                                                                                                                                                                                                 | -                         | C_ushii_01282_mRNA_6,1  | -                    |
| GF0040572 | 0                      | 1                | 0                 | Hypothetical protein (1)                                | protein ubiquitination [GO:0016567<br>biological_process (1)]; ubiquitin-protein<br>transferase activity [GO:0004842<br>molecular_function (1)                                                                                                                                                                                                                                                        | E3 ubiquitin ligase RBR family<br>[IPR031127] (1)                                                                                                                                                                                                                                                 | -                         | C_ushii_01282_mRNA_4,1  | -                    |
| GF0040571 | 0                      | 1                | 0                 | Hypothetical protein (1)                                | ubiquitin-protein transferase activity<br>[GO:0004842 molecular_function (1)];<br>protein ubiquitination [GO:0016567<br>biological_process (1)                                                                                                                                                                                                                                                        | UBR domain [IPR02867] (1); E3<br>ubiquitin ligase RBR family [IPR031127]<br>(1)                                                                                                                                                                                                                   | -                         | C_ushii_01282_mRNA_3,1  | -                    |
| GF0040570 | 0                      | 1                | 0                 | Hypothetical protein (1)                                | -                                                                                                                                                                                                                                                                                                                                                                                                     | -                                                                                                                                                                                                                                                                                                 | -                         | C_ushii_01282_mRNA_11,1 | -                    |
| GF0040569 | 0                      | 1                | 0                 | Hypothetical protein (1)                                | -                                                                                                                                                                                                                                                                                                                                                                                                     | -                                                                                                                                                                                                                                                                                                 | -                         | C_ushii_01281_mRNA_5,1  | -                    |
| GF0040568 | 0                      | 1                | 0                 | Hypothetical protein (1)                                | -                                                                                                                                                                                                                                                                                                                                                                                                     | -                                                                                                                                                                                                                                                                                                 | -                         | C_ushii_01280_mRNA_7,1  | -                    |

| ID       | Num. in <i>C. crottensteini</i> | Num. in <i>C. caudata</i> | Num. in <i>P. trifidatus</i> | Note                                                                     | GO                                                                                                                                                                                                                                                                                     | InterPro                                                                                                                                                                                                                                                                                                                                                                                                                                                                                                                                                               | Members in <i>C. crottensteini</i> | Members in <i>C. caudata</i> | Members in <i>P. trifidatus</i> |
|----------|---------------------------------|---------------------------|------------------------------|--------------------------------------------------------------------------|----------------------------------------------------------------------------------------------------------------------------------------------------------------------------------------------------------------------------------------------------------------------------------------|------------------------------------------------------------------------------------------------------------------------------------------------------------------------------------------------------------------------------------------------------------------------------------------------------------------------------------------------------------------------------------------------------------------------------------------------------------------------------------------------------------------------------------------------------------------------|------------------------------------|------------------------------|---------------------------------|
| GF004567 | 0                               | 1                         | 1                            | 0 Hypothetical protein (1)                                               |                                                                                                                                                                                                                                                                                        |                                                                                                                                                                                                                                                                                                                                                                                                                                                                                                                                                                        |                                    | C_ushii_01280_mRNA_2,1       | -                               |
| GF004566 | 0                               | 1                         | 1                            | 0 Hypothetical protein (1)                                               |                                                                                                                                                                                                                                                                                        | Glyoxalase II/cysteine resistance protein-Dihydroxyphenyl dioxygenase [IPR029068] (4)                                                                                                                                                                                                                                                                                                                                                                                                                                                                                  |                                    | C_ushii_01280_mRNA_1,1       | -                               |
| GF004565 | 0                               | 1                         | 1                            | 0 Hypothetical protein (1)                                               |                                                                                                                                                                                                                                                                                        |                                                                                                                                                                                                                                                                                                                                                                                                                                                                                                                                                                        |                                    | C_ushii_01278_mRNA_8,1       | -                               |
| GF004564 | 0                               | 1                         | 1                            | 0 Hypothetical protein (1)                                               |                                                                                                                                                                                                                                                                                        |                                                                                                                                                                                                                                                                                                                                                                                                                                                                                                                                                                        |                                    | C_ushii_01278_mRNA_7,1       | -                               |
| GF004563 | 0                               | 1                         | 1                            | 0 Hypothetical protein (1)                                               |                                                                                                                                                                                                                                                                                        |                                                                                                                                                                                                                                                                                                                                                                                                                                                                                                                                                                        |                                    | C_ushii_01278_mRNA_6,1       | -                               |
| GF004562 | 0                               | 1                         | 1                            | 0 Hypothetical protein (1)                                               |                                                                                                                                                                                                                                                                                        |                                                                                                                                                                                                                                                                                                                                                                                                                                                                                                                                                                        |                                    | C_ushii_01278_mRNA_5,1       | -                               |
| GF004561 | 0                               | 1                         | 1                            | 0 Hypothetical protein (1)                                               |                                                                                                                                                                                                                                                                                        |                                                                                                                                                                                                                                                                                                                                                                                                                                                                                                                                                                        |                                    | C_ushii_01278_mRNA_4,1       | -                               |
| GF004560 | 0                               | 1                         | 1                            | 0 Hypothetical protein (1)                                               |                                                                                                                                                                                                                                                                                        |                                                                                                                                                                                                                                                                                                                                                                                                                                                                                                                                                                        |                                    | C_ushii_01278_mRNA_2,1       | -                               |
| GF004559 | 0                               | 1                         | 1                            | 0 Hypothetical protein (1)                                               |                                                                                                                                                                                                                                                                                        |                                                                                                                                                                                                                                                                                                                                                                                                                                                                                                                                                                        |                                    | C_ushii_01278_mRNA_14,1      | -                               |
| GF004558 | 0                               | 1                         | 1                            | 0 Hypothetical protein (1)                                               |                                                                                                                                                                                                                                                                                        |                                                                                                                                                                                                                                                                                                                                                                                                                                                                                                                                                                        |                                    | C_ushii_01278_mRNA_12,1      | -                               |
| GF004557 | 0                               | 1                         | 1                            | 0 Hypothetical protein (1)                                               |                                                                                                                                                                                                                                                                                        |                                                                                                                                                                                                                                                                                                                                                                                                                                                                                                                                                                        |                                    | C_ushii_01278_mRNA_11,1      | -                               |
| GF004556 | 0                               | 1                         | 1                            | 0 Hypothetical protein (1)                                               |                                                                                                                                                                                                                                                                                        |                                                                                                                                                                                                                                                                                                                                                                                                                                                                                                                                                                        |                                    | C_ushii_01278_mRNA_10,1      | -                               |
| GF004555 | 0                               | 1                         | 1                            | 0 Hypothetical protein (1)                                               | DNA binding [GO:0003677]                                                                                                                                                                                                                                                               | hAT-like transposase, RNase-H fold [IPR025525] (1)                                                                                                                                                                                                                                                                                                                                                                                                                                                                                                                     |                                    | C_ushii_01277_mRNA_4,1       | -                               |
| GF004554 | 0                               | 1                         | 1                            | 0 Hypothetical protein (1)                                               |                                                                                                                                                                                                                                                                                        |                                                                                                                                                                                                                                                                                                                                                                                                                                                                                                                                                                        |                                    | C_ushii_01277_mRNA_3,1       | -                               |
| GF004553 | 0                               | 1                         | 1                            | 0 Hypothetical protein (1)                                               |                                                                                                                                                                                                                                                                                        |                                                                                                                                                                                                                                                                                                                                                                                                                                                                                                                                                                        |                                    | C_ushii_01276_mRNA_9,1       | -                               |
| GF004552 | 0                               | 1                         | 1                            | 0 Hypothetical protein (1)                                               |                                                                                                                                                                                                                                                                                        |                                                                                                                                                                                                                                                                                                                                                                                                                                                                                                                                                                        |                                    | C_ushii_01276_mRNA_6,1       | -                               |
| GF004551 | 0                               | 1                         | 1                            | 0 Hypothetical protein (1)                                               |                                                                                                                                                                                                                                                                                        |                                                                                                                                                                                                                                                                                                                                                                                                                                                                                                                                                                        |                                    | C_ushii_01276_mRNA_5,1       | -                               |
| GF004550 | 0                               | 1                         | 1                            | 0 Hypothetical protein (1)                                               |                                                                                                                                                                                                                                                                                        |                                                                                                                                                                                                                                                                                                                                                                                                                                                                                                                                                                        |                                    | C_ushii_01276_mRNA_15,1      | -                               |
| GF004549 | 0                               | 1                         | 1                            | 0 Hypothetical protein (1)                                               |                                                                                                                                                                                                                                                                                        |                                                                                                                                                                                                                                                                                                                                                                                                                                                                                                                                                                        |                                    | C_ushii_01275_mRNA_2,1       | -                               |
| GF004548 | 0                               | 1                         | 1                            | 0 Hypothetical protein (1)                                               |                                                                                                                                                                                                                                                                                        | Domain of unknown function DUF1985 [IPR015410] (4)                                                                                                                                                                                                                                                                                                                                                                                                                                                                                                                     |                                    | C_ushii_01274_mRNA_5,1       | -                               |
| GF004547 | 0                               | 1                         | 1                            | 0 Hypothetical protein (1)                                               |                                                                                                                                                                                                                                                                                        |                                                                                                                                                                                                                                                                                                                                                                                                                                                                                                                                                                        |                                    | C_ushii_01274_mRNA_3,1       | -                               |
| GF004546 | 0                               | 1                         | 1                            | 0 Catelic acid 3-O-methyltransferase (1)                                 | methyltransferase activity [GO:0008168 molecular_function] (1); O-methyltransferase family 2 [IPR010777] (1); Plant methyltransferase dimerization [IPR012967] (1); O-methyltransferase COMT-type [IPR016461] (1); S-adenosyl-L-methionine-dependent methyltransferase [IPR029063] (1) | Winged helix-turn-helix DNA-binding domain [IPR015991] (1); O-methyltransferase family 2 [IPR010777] (1); Plant methyltransferase dimerization [IPR012967] (1); O-methyltransferase COMT-type [IPR016461] (1); S-adenosyl-L-methionine-dependent methyltransferase [IPR029063] (1)                                                                                                                                                                                                                                                                                     |                                    | C_ushii_01273_mRNA_4,1       | -                               |
| GF004545 | 0                               | 1                         | 1                            | 0 Lectin (1)                                                             | carbohydrate binding [GO:0030246 molecular_function] (1)                                                                                                                                                                                                                               | Concanavalin A-like lectin/glycanase domain [IPR013320] (1); Lectin [IPR015863] (1); Legume lectin domain [IPR012201] (1)                                                                                                                                                                                                                                                                                                                                                                                                                                              |                                    | C_ushii_01272_mRNA_3,1       | -                               |
| GF004544 | 0                               | 1                         | 1                            | 0 Hypothetical protein (1)                                               | carbohydrate binding [GO:0030246 molecular_function] (1)                                                                                                                                                                                                                               | Concanavalin A-like lectin/glycanase domain [IPR013320] (1); Legume lectin domain [IPR012201] (1)                                                                                                                                                                                                                                                                                                                                                                                                                                                                      |                                    | C_ushii_01272_mRNA_2,1       | -                               |
| GF004543 | 0                               | 1                         | 1                            | 0 Hypothetical protein (1)                                               |                                                                                                                                                                                                                                                                                        |                                                                                                                                                                                                                                                                                                                                                                                                                                                                                                                                                                        |                                    | C_ushii_01271_mRNA_4,1       | -                               |
| GF004542 | 0                               | 1                         | 1                            | 0 Hypothetical protein (1)                                               |                                                                                                                                                                                                                                                                                        |                                                                                                                                                                                                                                                                                                                                                                                                                                                                                                                                                                        |                                    | C_ushii_01271_mRNA_3,1       | -                               |
| GF004541 | 0                               | 1                         | 1                            | 0 Hypothetical protein (1)                                               |                                                                                                                                                                                                                                                                                        |                                                                                                                                                                                                                                                                                                                                                                                                                                                                                                                                                                        |                                    | C_ushii_01271_mRNA_1,1       | -                               |
| GF004540 | 0                               | 1                         | 1                            | 0 Hypothetical protein (1)                                               | transmembrane transport [GO:0055985 biological_process] (1); solute proton antiporter activity [GO:0015299 molecular_function] (1); cation transport [GO:0006112 biological_process] (1); integral component of membrane [GO:0016021 cellular_component] (1)                           | Cation/H <sup>+</sup> exchanger [IPR006153] (1)                                                                                                                                                                                                                                                                                                                                                                                                                                                                                                                        |                                    | C_ushii_01270_mRNA_6,1       | -                               |
| GF004539 | 0                               | 1                         | 1                            | 0 Hypothetical protein (1)                                               |                                                                                                                                                                                                                                                                                        |                                                                                                                                                                                                                                                                                                                                                                                                                                                                                                                                                                        |                                    | C_ushii_01269_mRNA_2,1       | -                               |
| GF004538 | 0                               | 1                         | 1                            | 0 Leucine-rich repeat protein kinase family protein, putative (1)        | ATP binding [GO:0005524 molecular_function] (1); protein kinase activity [GO:0004672 molecular_function] (1); protein phosphorylation [GO:0006468 biological_process] (1); protein binding [GO:0005515 molecular_function] (1)                                                         | Serine/threonine/tyrosine protein kinase, catalytic domain [IPR002290] (1); Leucine-rich repeat-containing N-terminal, plant-type [IPR013210] (1); Serine/threonine-protein kinase, active site [IPR008271] (1); Protein kinase, ATP binding site [IPR017441] (1); Leucine-rich repeat [IPR016111] (1); Protein kinase domain [IPR000719] (1); Concanavalin A-like lectin/glycanase domain [IPR013320] (1); Protein kinase-like domain [IPR011099] (1); Leucine-rich repeat domain, L domain-like [IPR032675] (1); Leucine-rich repeat, typical subtype [IPR03591] (1) |                                    | C_ushii_01268_mRNA_6,1       | -                               |
| GF004537 | 0                               | 1                         | 1                            | 0 Hypothetical protein (1)                                               |                                                                                                                                                                                                                                                                                        |                                                                                                                                                                                                                                                                                                                                                                                                                                                                                                                                                                        |                                    | C_ushii_01268_mRNA_4,1       | -                               |
| GF004536 | 0                               | 1                         | 1                            | 0 Hypothetical protein (1)                                               | DNA binding [GO:0003677 molecular_function] (1); nucleic acid binding [GO:0003676 molecular_function] (1)                                                                                                                                                                              | Ribonuclease H-like domain [IPR012337] (1); hAT-like transposase, RNase-H fold [IPR025525] (1)                                                                                                                                                                                                                                                                                                                                                                                                                                                                         |                                    | C_ushii_01268_mRNA_2,1       | -                               |
| GF004535 | 0                               | 1                         | 1                            | 0 Hypothetical protein (1)                                               |                                                                                                                                                                                                                                                                                        |                                                                                                                                                                                                                                                                                                                                                                                                                                                                                                                                                                        |                                    | C_ushii_01267_mRNA_7,1       | -                               |
| GF004534 | 0                               | 1                         | 1                            | 0 Hypothetical protein (1)                                               |                                                                                                                                                                                                                                                                                        |                                                                                                                                                                                                                                                                                                                                                                                                                                                                                                                                                                        |                                    | C_ushii_01267_mRNA_5,1       | -                               |
| GF004533 | 0                               | 1                         | 1                            | 0 Hypothetical protein (1)                                               |                                                                                                                                                                                                                                                                                        |                                                                                                                                                                                                                                                                                                                                                                                                                                                                                                                                                                        |                                    | C_ushii_01266_mRNA_4,1       | -                               |
| GF004532 | 0                               | 1                         | 1                            | 0 Hypothetical protein (1)                                               |                                                                                                                                                                                                                                                                                        |                                                                                                                                                                                                                                                                                                                                                                                                                                                                                                                                                                        |                                    | C_ushii_01266_mRNA_2,1       | -                               |
| GF004531 | 0                               | 1                         | 1                            | 0 Hypothetical protein (1)                                               |                                                                                                                                                                                                                                                                                        |                                                                                                                                                                                                                                                                                                                                                                                                                                                                                                                                                                        |                                    | C_ushii_01266_mRNA_1,1       | -                               |
| GF004530 | 0                               | 1                         | 1                            | 0 Disease resistance family protein / LRR family protein, putative (1)   | protein binding [GO:0005515 molecular_function] (1)                                                                                                                                                                                                                                    | Leucine-rich repeat domain, L domain-like [IPR032675] (1); Leucine-rich repeat, typical subtype [IPR03591] (1); Leucine-rich repeat [IPR016111] (1)                                                                                                                                                                                                                                                                                                                                                                                                                    |                                    | C_ushii_01265_mRNA_9,1       | -                               |
| GF004529 | 0                               | 1                         | 1                            | 0 Hypothetical protein (1)                                               | protein binding [GO:0005515 molecular_function] (1); nucleic acid binding [GO:0003676 molecular_function] (1); protein dimerization activity [GO:0046983 molecular_function] (1)                                                                                                       | HAT, C-terminal dimerization domain [IPR008061] (1); Leucine-rich repeat [IPR016111] (1); Ribonuclease H-like domain [IPR012337] (1); Leucine-rich repeat domain, L domain-like [IPR032675] (1); Leucine-rich repeat 4 [IPR025875] (1)                                                                                                                                                                                                                                                                                                                                 |                                    | C_ushii_01265_mRNA_3,1       | -                               |
| GF004528 | 0                               | 1                         | 1                            | 0 Hypothetical protein (1)                                               |                                                                                                                                                                                                                                                                                        |                                                                                                                                                                                                                                                                                                                                                                                                                                                                                                                                                                        |                                    | C_ushii_01265_mRNA_14,1      | -                               |
| GF004527 | 0                               | 1                         | 1                            | 0 Hypothetical protein (1)                                               | protein binding [GO:0005515 molecular_function] (1)                                                                                                                                                                                                                                    | Leucine-rich repeat [IPR016111] (1); Leucine-rich repeat domain, L domain-like [IPR032675] (1); Leucine-rich repeat, typical subtype [IPR03591] (1)                                                                                                                                                                                                                                                                                                                                                                                                                    |                                    | C_ushii_01265_mRNA_10,1      | -                               |
| GF004526 | 0                               | 1                         | 1                            | 0 Hypothetical protein (1)                                               |                                                                                                                                                                                                                                                                                        |                                                                                                                                                                                                                                                                                                                                                                                                                                                                                                                                                                        |                                    | C_ushii_01264_mRNA_9,1       | -                               |
| GF004525 | 0                               | 1                         | 1                            | 0 Hypothetical protein (1)                                               |                                                                                                                                                                                                                                                                                        |                                                                                                                                                                                                                                                                                                                                                                                                                                                                                                                                                                        |                                    | C_ushii_01264_mRNA_8,1       | -                               |
| GF004524 | 0                               | 1                         | 1                            | 0 Hypothetical protein (1)                                               |                                                                                                                                                                                                                                                                                        |                                                                                                                                                                                                                                                                                                                                                                                                                                                                                                                                                                        |                                    | C_ushii_01264_mRNA_7,1       | -                               |
| GF004523 | 0                               | 1                         | 1                            | 0 Hypothetical protein (1)                                               |                                                                                                                                                                                                                                                                                        |                                                                                                                                                                                                                                                                                                                                                                                                                                                                                                                                                                        |                                    | C_ushii_01264_mRNA_10,1      | -                               |
| GF004522 | 0                               | 1                         | 1                            | 0 Hypothetical protein (1)                                               |                                                                                                                                                                                                                                                                                        |                                                                                                                                                                                                                                                                                                                                                                                                                                                                                                                                                                        |                                    | C_ushii_01263_mRNA_7,1       | -                               |
| GF004521 | 0                               | 1                         | 1                            | 0 Hypothetical protein (1)                                               | GTPase activity [GO:0003924 molecular_function] (1); cytoplasm [GO:0005737 cellular_component] (1); integral component of membrane [GO:0016021 cellular_component] (1); GTP binding [GO:0005525 molecular_function] (1)                                                                | Tubulin/Fu2, GTPase domain [IPR030801] (1); Cell division protein Fus2, conserved site [IPR020805] (1); Nop59p (TM95F) [IPR004240] (1)                                                                                                                                                                                                                                                                                                                                                                                                                                 |                                    | C_ushii_01263_mRNA_4,1       | -                               |
| GF004520 | 0                               | 1                         | 1                            | 0 Hypothetical protein (1)                                               |                                                                                                                                                                                                                                                                                        |                                                                                                                                                                                                                                                                                                                                                                                                                                                                                                                                                                        |                                    | C_ushii_01263_mRNA_1,1       | -                               |
| GF004519 | 0                               | 1                         | 1                            | 0 Pentatricopeptide repeat (PPR) repeat protein (1)                      |                                                                                                                                                                                                                                                                                        |                                                                                                                                                                                                                                                                                                                                                                                                                                                                                                                                                                        |                                    | C_ushii_01262_mRNA_9,1       | -                               |
| GF004518 | 0                               | 1                         | 1                            | 0 Hypothetical protein (1)                                               |                                                                                                                                                                                                                                                                                        |                                                                                                                                                                                                                                                                                                                                                                                                                                                                                                                                                                        |                                    | C_ushii_01262_mRNA_7,1       | -                               |
| GF004517 | 0                               | 1                         | 1                            | 0 Pentatricopeptide repeat (PPR) repeat protein (1)                      | protein binding [GO:0005515 molecular_function] (1)                                                                                                                                                                                                                                    | Pentatricopeptide repeat [IPR02885] (1); Pentatricopeptide repeat [IPR02885] (1); Tetraatricopeptide-like helical domain [IPR011900] (1)                                                                                                                                                                                                                                                                                                                                                                                                                               |                                    | C_ushii_01262_mRNA_6,1       | -                               |
| GF004516 | 0                               | 1                         | 1                            | 0 Hypothetical protein (1)                                               |                                                                                                                                                                                                                                                                                        |                                                                                                                                                                                                                                                                                                                                                                                                                                                                                                                                                                        |                                    | C_ushii_01262_mRNA_3,1       | -                               |
| GF004515 | 0                               | 1                         | 1                            | 0 Tetraatricopeptide repeat (TPR)-like superfamily protein, putative (1) |                                                                                                                                                                                                                                                                                        |                                                                                                                                                                                                                                                                                                                                                                                                                                                                                                                                                                        |                                    | C_ushii_01262_mRNA_2,1       | -                               |
| GF004514 | 0                               | 1                         | 1                            | 0 Hypothetical protein (1)                                               |                                                                                                                                                                                                                                                                                        |                                                                                                                                                                                                                                                                                                                                                                                                                                                                                                                                                                        |                                    | C_ushii_01261_mRNA_1,1       | -                               |
| GF004513 | 0                               | 1                         | 1                            | 0 Hypothetical protein (1)                                               |                                                                                                                                                                                                                                                                                        |                                                                                                                                                                                                                                                                                                                                                                                                                                                                                                                                                                        |                                    | C_ushii_01260_mRNA_7,1       | -                               |
| GF004512 | 0                               | 1                         | 1                            | 0 Hypothetical protein (1)                                               |                                                                                                                                                                                                                                                                                        |                                                                                                                                                                                                                                                                                                                                                                                                                                                                                                                                                                        |                                    | C_ushii_01260_mRNA_5,1       | -                               |
| GF004511 | 0                               | 1                         | 1                            | 0 Hypothetical protein (1)                                               |                                                                                                                                                                                                                                                                                        |                                                                                                                                                                                                                                                                                                                                                                                                                                                                                                                                                                        |                                    | C_ushii_01260_mRNA_3,1       | -                               |
| GF004510 | 0                               | 1                         | 1                            | 0 Hypothetical protein (1)                                               | BLOC-1 complex [GO:0031083 cellular_component] (1); intracellular protein transport [GO:0006886 biological_process] (1)                                                                                                                                                                | Snupin [IPR017240] (1); Snupin/Palindromin [IPR028119] (1)                                                                                                                                                                                                                                                                                                                                                                                                                                                                                                             |                                    | C_ushii_01259_mRNA_8,1       | -                               |
| GF004509 | 0                               | 1                         | 1                            | 0 Hypothetical protein (1)                                               |                                                                                                                                                                                                                                                                                        |                                                                                                                                                                                                                                                                                                                                                                                                                                                                                                                                                                        |                                    | C_ushii_01259_mRNA_7,1       | -                               |
| GF004508 | 0                               | 1                         | 1                            | 0 Hypothetical protein (1)                                               |                                                                                                                                                                                                                                                                                        |                                                                                                                                                                                                                                                                                                                                                                                                                                                                                                                                                                        |                                    | C_ushii_01259_mRNA_6,1       | -                               |
| GF004507 | 0                               | 1                         | 1                            | 0 Hypothetical protein (1)                                               | nucleic acid binding [GO:0003676 molecular_function] (1)                                                                                                                                                                                                                               | Ribonuclease H-like domain [IPR012337] (1)                                                                                                                                                                                                                                                                                                                                                                                                                                                                                                                             |                                    | C_ushii_01259_mRNA_3,1       | -                               |
| GF004506 | 0                               | 1                         | 1                            | 0 Hypothetical protein (1)                                               |                                                                                                                                                                                                                                                                                        |                                                                                                                                                                                                                                                                                                                                                                                                                                                                                                                                                                        |                                    | C_ushii_01259_mRNA_12,1      | -                               |
| GF004505 | 0                               | 1                         | 1                            | 0 Flavonone 3-dioxygenase (1)                                            | oxidation-reduction process [GO:0055114 biological_process] (1); oxidoreductase activity [GO:0016491 molecular_function] (1)                                                                                                                                                           | Oxoglutarate-iron-dependent dioxygenase [IPR005123] (1); Isopenicillin N synthase-like [IPR027443] (1)                                                                                                                                                                                                                                                                                                                                                                                                                                                                 |                                    | C_ushii_01259_mRNA_1,1       | -                               |
| GF004504 | 0                               | 1                         | 1                            | 0 Hypothetical protein (1)                                               |                                                                                                                                                                                                                                                                                        |                                                                                                                                                                                                                                                                                                                                                                                                                                                                                                                                                                        |                                    | C_ushii_01258_mRNA_7,1       | -                               |
| GF004503 | 0                               | 1                         | 1                            | 0 Hypothetical protein (1)                                               |                                                                                                                                                                                                                                                                                        |                                                                                                                                                                                                                                                                                                                                                                                                                                                                                                                                                                        |                                    | C_ushii_01258_mRNA_3,1       | -                               |
| GF004502 | 0                               | 1                         | 1                            | 0 Hypothetical protein (1)                                               |                                                                                                                                                                                                                                                                                        | Gag-polypeptide of LTR copia-type [IPR02472] (4)                                                                                                                                                                                                                                                                                                                                                                                                                                                                                                                       |                                    | C_ushii_01258_mRNA_13,1      | -                               |
| GF004501 | 0                               | 1                         | 1                            | 0 Hypothetical protein (1)                                               |                                                                                                                                                                                                                                                                                        | Winged helix-turn-helix DNA-binding domain [IPR015991] (1); Leucine-rich repeat domain, L domain-like [IPR032675] (1)                                                                                                                                                                                                                                                                                                                                                                                                                                                  |                                    | C_ushii_01258_mRNA_11,1      | -                               |
| GF004500 | 0                               | 1                         | 1                            | 0 Hypothetical protein (1)                                               |                                                                                                                                                                                                                                                                                        |                                                                                                                                                                                                                                                                                                                                                                                                                                                                                                                                                                        |                                    | C_ushii_01258_mRNA_10,1      | -                               |
| GF004499 | 0                               | 1                         | 1                            | 0 Hypothetical protein (1)                                               |                                                                                                                                                                                                                                                                                        |                                                                                                                                                                                                                                                                                                                                                                                                                                                                                                                                                                        |                                    | C_ushii_01257_mRNA_9,1       | -                               |
| GF004498 | 0                               | 1                         | 1                            | 0 Thiazole biosynthetic enzyme (1)                                       | oxidoreductase activity [GO:0016491 molecular_function] (1); oxidation-reduction process [GO:0055114 biological_process] (1)                                                                                                                                                           | Thiazole biosynthetic enzyme, ThiA family [IPR02922] (1); FAD/NAD(P)-binding domain [IPR023753] (1)                                                                                                                                                                                                                                                                                                                                                                                                                                                                    |                                    | C_ushii_01257_mRNA_1,1       | -                               |
| GF004497 | 0                               | 1                         | 1                            | 0 Hypothetical protein (1)                                               |                                                                                                                                                                                                                                                                                        |                                                                                                                                                                                                                                                                                                                                                                                                                                                                                                                                                                        |                                    | C_ushii_01256_mRNA_7,1       | -                               |
| GF004496 | 0                               | 1                         | 1                            | 0 Hypothetical protein (1)                                               |                                                                                                                                                                                                                                                                                        |                                                                                                                                                                                                                                                                                                                                                                                                                                                                                                                                                                        |                                    | C_ushii_01256_mRNA_6,1       | -                               |
| GF004495 | 0                               | 1                         | 1                            | 0 Hypothetical protein (1)                                               |                                                                                                                                                                                                                                                                                        |                                                                                                                                                                                                                                                                                                                                                                                                                                                                                                                                                                        |                                    | C_ushii_01256_mRNA_5,1       | -                               |
| GF004494 | 0                               | 1                         | 1                            | 0 Hypothetical protein (1)                                               |                                                                                                                                                                                                                                                                                        |                                                                                                                                                                                                                                                                                                                                                                                                                                                                                                                                                                        |                                    | C_ushii_01256_mRNA_4,1       | -                               |
| GF004493 | 0                               | 1                         | 1                            | 0 Cysteine-rich RLK (Receptor-like kinase) protein (1)                   | ATP binding [GO:0005524 molecular_function] (1); protein phosphorylation [GO:0006468 biological_process] (1); protein kinase activity [GO:0004672 molecular_function] (1); protein serine/threonine kinase activity [GO:0004674 molecular_function] (1)                                | Bull-type lectin domain [IPR001480] (1); Serine/threonine/tyrosine-protein kinase catalytic domain [IPR012451] (1); Serine/threonine/tyrosine-protein kinase, catalytic domain [IPR002290] (1); Serine/threonine-protein kinase, active site [IPR008271] (1); S-locus receptor kinase, C-terminal [IPR012820] (1); Protein kinase-like domain [IPR011099] (1); Protein kinase domain [IPR000719] (1)                                                                                                                                                                   |                                    | C_ushii_01256_mRNA_2,1       | -                               |
| GF004492 | 0                               | 1                         | 1                            | 0 Hypothetical protein (1)                                               |                                                                                                                                                                                                                                                                                        |                                                                                                                                                                                                                                                                                                                                                                                                                                                                                                                                                                        |                                    | C_ushii_01255_mRNA_5,1       | -                               |
| GF004491 | 0                               | 1                         | 1                            | 0 Hypothetical protein (1)                                               |                                                                                                                                                                                                                                                                                        |                                                                                                                                                                                                                                                                                                                                                                                                                                                                                                                                                                        |                                    | C_ushii_01255_mRNA_4,1       | -                               |



| ID       | Num. in <i>C. crottensteini</i> | Num. in <i>C. arabidis</i> | Num. in <i>P. trifidatus</i> | Note                                                                          | GO                                                                                                                                                                                                                                                                                                                          | InterPro                                                                                                                                                                                                                                                                                                                 | Members in <i>C. crottensteini</i> | Members in <i>C. arabidis</i> | Members in <i>P. trifidatus</i> |
|----------|---------------------------------|----------------------------|------------------------------|-------------------------------------------------------------------------------|-----------------------------------------------------------------------------------------------------------------------------------------------------------------------------------------------------------------------------------------------------------------------------------------------------------------------------|--------------------------------------------------------------------------------------------------------------------------------------------------------------------------------------------------------------------------------------------------------------------------------------------------------------------------|------------------------------------|-------------------------------|---------------------------------|
| GF000490 | 0                               | 1                          | 0                            | Hypothetical protein (1)                                                      | nucleic acid binding [GO:0003676 molecular_function] (1); biosynthetic process [GO:0009058 biological_process] (1); catalytic activity [GO:0003824 molecular_function] (1); pyridoxal phosphate binding [GO:0030170 molecular_function] (1); zinc ion binding [GO:0000270 molecular_function] (1)                           | Pyridoxal phosphate-dependent transaminase [IPRO1542] (1); Zinc finger, C2HC-type [IPRO01978] (1); Pyridoxal phosphate-dependent transaminase, major region, subdomain 1 [IPRO1542] (1); Zinc finger, SWIM-type [IPRO07527] (1); Zinc finger, PBM-type [IPRO06564] (1); Aminotransferase, class I class1 [IPRO04839] (1) | -                                  | C_ushii_01254_mRNA_6.1        | -                               |
| GF000489 | 0                               | 1                          | 0                            | 22.0 kDa class IV heat shock protein (1)                                      |                                                                                                                                                                                                                                                                                                                             | Small heat shock protein HSP20 [IPRO1107] (1); Alpha crystallin Hsp20 domain [IPRO20688] (1); HSP20-like chaperone [IPRO08975] (1)                                                                                                                                                                                       | -                                  | C_ushii_01254_mRNA_4.1        | -                               |
| GF000488 | 0                               | 1                          | 0                            | Hypothetical protein (1)                                                      |                                                                                                                                                                                                                                                                                                                             |                                                                                                                                                                                                                                                                                                                          | -                                  | C_ushii_01254_mRNA_1.1        | -                               |
| GF000487 | 0                               | 1                          | 0                            | Hypothetical protein (1)                                                      |                                                                                                                                                                                                                                                                                                                             |                                                                                                                                                                                                                                                                                                                          | -                                  | C_ushii_01253_mRNA_5.1        | -                               |
| GF000486 | 0                               | 1                          | 0                            | Hypothetical protein (1)                                                      |                                                                                                                                                                                                                                                                                                                             |                                                                                                                                                                                                                                                                                                                          | -                                  | C_ushii_01253_mRNA_4.1        | -                               |
| GF000485 | 0                               | 1                          | 0                            | Hypothetical protein (1)                                                      |                                                                                                                                                                                                                                                                                                                             |                                                                                                                                                                                                                                                                                                                          | -                                  | C_ushii_01251_mRNA_9.1        | -                               |
| GF000484 | 0                               | 1                          | 0                            | Hypothetical protein (1)                                                      |                                                                                                                                                                                                                                                                                                                             |                                                                                                                                                                                                                                                                                                                          | -                                  | C_ushii_01251_mRNA_6.1        | -                               |
| GF000483 | 0                               | 1                          | 0                            | Hypothetical protein (1)                                                      |                                                                                                                                                                                                                                                                                                                             |                                                                                                                                                                                                                                                                                                                          | -                                  | C_ushii_01251_mRNA_3.1        | -                               |
| GF000482 | 0                               | 1                          | 0                            | Hypothetical protein (1)                                                      |                                                                                                                                                                                                                                                                                                                             |                                                                                                                                                                                                                                                                                                                          | -                                  | C_ushii_01251_mRNA_2.1        | -                               |
| GF000481 | 0                               | 1                          | 0                            | Hypothetical protein (1)                                                      |                                                                                                                                                                                                                                                                                                                             |                                                                                                                                                                                                                                                                                                                          | -                                  | C_ushii_01251_mRNA_10.1       | -                               |
| GF000480 | 0                               | 1                          | 0                            | Hypothetical protein (1)                                                      |                                                                                                                                                                                                                                                                                                                             |                                                                                                                                                                                                                                                                                                                          | -                                  | C_ushii_01251_mRNA_1.1        | -                               |
| GF000479 | 0                               | 1                          | 0                            | Hypothetical protein (1)                                                      |                                                                                                                                                                                                                                                                                                                             |                                                                                                                                                                                                                                                                                                                          | -                                  | C_ushii_01250_mRNA_9.1        | -                               |
| GF000478 | 0                               | 1                          | 0                            | Hypothetical protein (1)                                                      |                                                                                                                                                                                                                                                                                                                             |                                                                                                                                                                                                                                                                                                                          | -                                  | C_ushii_01250_mRNA_6.1        | -                               |
| GF000477 | 0                               | 1                          | 0                            | Hypothetical protein (1)                                                      |                                                                                                                                                                                                                                                                                                                             |                                                                                                                                                                                                                                                                                                                          | -                                  | C_ushii_01250_mRNA_11.1       | -                               |
| GF000476 | 0                               | 1                          | 0                            | U4/U6 small nuclear PRP4-like protein (1)                                     | RNA splicing [GO:0003830 biological_process] (1)                                                                                                                                                                                                                                                                            | Splicing factor motif [IPRO03648] (1); Pre-mRNA processing factor 4 (PRP4)-like [IPRO1990] (1); U4/U6 small nuclear ribonucleoprotein Prp4 [IPRO27106] (1)                                                                                                                                                               | -                                  | C_ushii_01249_mRNA_8.1        | -                               |
| GF000475 | 0                               | 1                          | 0                            | Hypothetical protein (1)                                                      |                                                                                                                                                                                                                                                                                                                             |                                                                                                                                                                                                                                                                                                                          | -                                  | C_ushii_01249_mRNA_3.1        | -                               |
| GF000474 | 0                               | 1                          | 0                            | Hypothetical protein (1)                                                      |                                                                                                                                                                                                                                                                                                                             |                                                                                                                                                                                                                                                                                                                          | -                                  | C_ushii_01249_mRNA_1.1        | -                               |
| GF000473 | 0                               | 1                          | 0                            | ER-derived vesicles protein ERV14 (1)                                         | regulation of transcription, DNA-templated [GO:0006355 biological_process] (1); core TFIIH complex [GO:0000439 cellular_component] (1); membrane [GO:0016020 cellular_component] (1); intracellular signal transduction [GO:0035556 biological_process] (1); nucleotide-excision repair [GO:0006289 biological_process] (1) | Curtainase [IPRO03377] (1); TFIIH subunit TTD.A.TS [IPRO09406] (1)                                                                                                                                                                                                                                                       | -                                  | C_ushii_01248_mRNA_4.1        | -                               |
| GF000472 | 0                               | 1                          | 0                            | Hypothetical protein (1)                                                      |                                                                                                                                                                                                                                                                                                                             |                                                                                                                                                                                                                                                                                                                          | -                                  | C_ushii_01247_mRNA_4.1        | -                               |
| GF000471 | 0                               | 1                          | 0                            | Hypothetical protein (1)                                                      |                                                                                                                                                                                                                                                                                                                             |                                                                                                                                                                                                                                                                                                                          | -                                  | C_ushii_01247_mRNA_12.1       | -                               |
| GF000470 | 0                               | 1                          | 0                            | U4/U6 small nuclear ribonucleoprotein PRP4-like protein (1)                   | protein binding [GO:0005515 molecular_function] (1)                                                                                                                                                                                                                                                                         | U4/U6 small nuclear ribonucleoprotein Prp4 [IPRO27106] (1); G-protein beta WD40 repeat [IPRO04072] (1); WD40 YVFN repeat-like containing domain [IPRO19543] (1); WD40 repeat, conserved site [IPRO19755] (1); WD40 repeat [IPRO01680] (1); WD40 repeat-containing domain [IPRO17986] (1)                                 | -                                  | C_ushii_01247_mRNA_1.1        | -                               |
| GF000469 | 0                               | 1                          | 0                            | Hypothetical protein (1)                                                      |                                                                                                                                                                                                                                                                                                                             |                                                                                                                                                                                                                                                                                                                          | -                                  | C_ushii_01246_mRNA_3.1        | -                               |
| GF000468 | 0                               | 1                          | 0                            | Hypothetical protein (1)                                                      | proteolysis [GO:0006508 biological_process] (1); aspartic-type endopeptidase activity [GO:0004190 molecular_function] (1)                                                                                                                                                                                                   | Peptidase A2A, retrovirus, catalytic [IPRO01995] (1)                                                                                                                                                                                                                                                                     | -                                  | C_ushii_01245_mRNA_8.1        | -                               |
| GF000467 | 0                               | 1                          | 0                            | Hypothetical protein (1)                                                      |                                                                                                                                                                                                                                                                                                                             |                                                                                                                                                                                                                                                                                                                          | -                                  | C_ushii_01245_mRNA_7.1        | -                               |
| GF000466 | 0                               | 1                          | 0                            | Hypothetical protein (1)                                                      |                                                                                                                                                                                                                                                                                                                             |                                                                                                                                                                                                                                                                                                                          | -                                  | C_ushii_01245_mRNA_5.1        | -                               |
| GF000465 | 0                               | 1                          | 0                            | Hypothetical protein (1)                                                      |                                                                                                                                                                                                                                                                                                                             |                                                                                                                                                                                                                                                                                                                          | -                                  | C_ushii_01245_mRNA_3.1        | -                               |
| GF000464 | 0                               | 1                          | 0                            | Hypothetical protein (1)                                                      |                                                                                                                                                                                                                                                                                                                             |                                                                                                                                                                                                                                                                                                                          | -                                  | C_ushii_01245_mRNA_14.1       | -                               |
| GF000463 | 0                               | 1                          | 0                            | Hypothetical protein (1)                                                      |                                                                                                                                                                                                                                                                                                                             |                                                                                                                                                                                                                                                                                                                          | -                                  | C_ushii_01245_mRNA_13.1       | -                               |
| GF000462 | 0                               | 1                          | 0                            | Hypothetical protein (1)                                                      |                                                                                                                                                                                                                                                                                                                             |                                                                                                                                                                                                                                                                                                                          | -                                  | C_ushii_01245_mRNA_12.1       | -                               |
| GF000461 | 0                               | 1                          | 0                            | Hypothetical protein (1)                                                      |                                                                                                                                                                                                                                                                                                                             |                                                                                                                                                                                                                                                                                                                          | -                                  | C_ushii_01245_mRNA_1.1        | -                               |
| GF000460 | 0                               | 1                          | 0                            | Hypothetical protein (1)                                                      |                                                                                                                                                                                                                                                                                                                             |                                                                                                                                                                                                                                                                                                                          | -                                  | C_ushii_01244_mRNA_2.1        | -                               |
| GF000459 | 0                               | 1                          | 0                            | Aadysin repair protein (1)                                                    |                                                                                                                                                                                                                                                                                                                             | PGS domain [IPRO26961] (1)                                                                                                                                                                                                                                                                                               | -                                  | C_ushii_01242_mRNA_11.1       | -                               |
| GF000458 | 0                               | 1                          | 0                            | Hypothetical protein (1)                                                      |                                                                                                                                                                                                                                                                                                                             |                                                                                                                                                                                                                                                                                                                          | -                                  | C_ushii_01241_mRNA_3.1        | -                               |
| GF000457 | 0                               | 1                          | 0                            | Hypothetical protein (1)                                                      | protein binding [GO:0005515 molecular_function] (1); zinc ion binding [GO:0000270 molecular_function] (1)                                                                                                                                                                                                                   | Zinc finger, RING-FYVE/PHD-type [IPRO13082] (1); Zinc finger, RING-type [IPRO18413] (1); Zinc finger, RING-type, conserved site [IPRO17907] (1)                                                                                                                                                                          | -                                  | C_ushii_01241_mRNA_2.1        | -                               |
| GF000456 | 0                               | 1                          | 0                            | SPX domain gene 1, putative (1)                                               | cellular response to phosphate starvation [GO:0016036 biological_process] (1)                                                                                                                                                                                                                                               | SPX domain-containing protein [IPRO1142] (1); SPX domain [IPRO04311] (1)                                                                                                                                                                                                                                                 | -                                  | C_ushii_01240_mRNA_9.1        | -                               |
| GF000455 | 0                               | 1                          | 0                            | Hypothetical protein (1)                                                      | nucleic acid binding [GO:0003676 molecular_function] (1)                                                                                                                                                                                                                                                                    | Ribonuclease H-like domain [IPRO12327] (1); Domain of unknown function DU4283 [IPRO25558] (1)                                                                                                                                                                                                                            | -                                  | C_ushii_01240_mRNA_5.1        | -                               |
| GF000454 | 0                               | 1                          | 0                            | Hypothetical protein (1)                                                      |                                                                                                                                                                                                                                                                                                                             |                                                                                                                                                                                                                                                                                                                          | -                                  | C_ushii_01240_mRNA_3.1        | -                               |
| GF000453 | 0                               | 1                          | 0                            | Hypothetical protein (1)                                                      |                                                                                                                                                                                                                                                                                                                             |                                                                                                                                                                                                                                                                                                                          | -                                  | C_ushii_01240_mRNA_1.1        | -                               |
| GF000452 | 0                               | 1                          | 0                            | Hypothetical protein (1)                                                      |                                                                                                                                                                                                                                                                                                                             |                                                                                                                                                                                                                                                                                                                          | -                                  | C_ushii_01238_mRNA_3.1        | -                               |
| GF000451 | 0                               | 1                          | 0                            | Hypothetical protein (1)                                                      |                                                                                                                                                                                                                                                                                                                             |                                                                                                                                                                                                                                                                                                                          | -                                  | C_ushii_01237_mRNA_4.1        | -                               |
| GF000450 | 0                               | 1                          | 0                            | Hypothetical protein (1)                                                      |                                                                                                                                                                                                                                                                                                                             |                                                                                                                                                                                                                                                                                                                          | -                                  | C_ushii_01237_mRNA_11.1       | -                               |
| GF000449 | 0                               | 1                          | 0                            | Hypothetical protein (1)                                                      |                                                                                                                                                                                                                                                                                                                             |                                                                                                                                                                                                                                                                                                                          | -                                  | C_ushii_01236_mRNA_6.1        | -                               |
| GF000448 | 0                               | 1                          | 0                            | Hypothetical protein (1)                                                      | ADP binding [GO:0043511 molecular_function] (1); protein binding [GO:0005515 molecular_function] (1)                                                                                                                                                                                                                        | NB-ARC [IPRO02182] (1); Leucine-rich repeat [IPRO01611] (1); P-loop containing nucleoside triphosphate hydrolase [IPRO23471] (1); Leucine-rich repeat domain, L domain-like [IPRO32675] (1)                                                                                                                              | -                                  | C_ushii_01236_mRNA_4.1        | -                               |
| GF000447 | 0                               | 1                          | 0                            | Hypothetical protein (1)                                                      | phosphoric ester hydrolase activity [GO:0042578 molecular_function] (1)                                                                                                                                                                                                                                                     | SAC domain [IPRO02013] (1)                                                                                                                                                                                                                                                                                               | -                                  | C_ushii_01236_mRNA_3.1        | -                               |
| GF000446 | 0                               | 1                          | 0                            | Hypothetical protein (1)                                                      |                                                                                                                                                                                                                                                                                                                             |                                                                                                                                                                                                                                                                                                                          | -                                  | C_ushii_01236_mRNA_1.1        | -                               |
| GF000445 | 0                               | 1                          | 0                            | Hypothetical protein (1)                                                      |                                                                                                                                                                                                                                                                                                                             |                                                                                                                                                                                                                                                                                                                          | -                                  | C_ushii_01235_mRNA_1.1        | -                               |
| GF000444 | 0                               | 1                          | 0                            | Hypothetical protein (1)                                                      |                                                                                                                                                                                                                                                                                                                             |                                                                                                                                                                                                                                                                                                                          | -                                  | C_ushii_01234_mRNA_4.1        | -                               |
| GF000443 | 0                               | 1                          | 0                            | Hypothetical protein (1)                                                      |                                                                                                                                                                                                                                                                                                                             |                                                                                                                                                                                                                                                                                                                          | -                                  | C_ushii_01234_mRNA_3.1        | -                               |
| GF000442 | 0                               | 1                          | 0                            | Hypothetical protein (1)                                                      |                                                                                                                                                                                                                                                                                                                             |                                                                                                                                                                                                                                                                                                                          | -                                  | C_ushii_01234_mRNA_2.1        | -                               |
| GF000441 | 0                               | 1                          | 0                            | Hypothetical protein (1)                                                      |                                                                                                                                                                                                                                                                                                                             |                                                                                                                                                                                                                                                                                                                          | -                                  | C_ushii_01233_mRNA_7.1        | -                               |
| GF000440 | 0                               | 1                          | 0                            | Hypothetical protein (1)                                                      | signal transduction [GO:0007165 biological_process] (1); protein binding [GO:0005515 molecular_function] (1)                                                                                                                                                                                                                | Toll/interleukin-1 receptor homology (TIR) domain [IPRO00157] (1)                                                                                                                                                                                                                                                        | -                                  | C_ushii_01233_mRNA_6.1        | -                               |
| GF000439 | 0                               | 1                          | 0                            | Hypothetical protein (1)                                                      |                                                                                                                                                                                                                                                                                                                             |                                                                                                                                                                                                                                                                                                                          | -                                  | C_ushii_01233_mRNA_5.1        | -                               |
| GF000438 | 0                               | 1                          | 0                            | Putative WRKY transcription factor 19-like protein (1)                        |                                                                                                                                                                                                                                                                                                                             | Leucine-rich repeat domain, L domain-like [IPRO32675] (1)                                                                                                                                                                                                                                                                | -                                  | C_ushii_01233_mRNA_1.1        | -                               |
| GF000437 | 0                               | 1                          | 0                            | Hypothetical protein (1)                                                      |                                                                                                                                                                                                                                                                                                                             |                                                                                                                                                                                                                                                                                                                          | -                                  | C_ushii_01231_mRNA_8.1        | -                               |
| GF000436 | 0                               | 1                          | 0                            | Hypothetical protein (1)                                                      | nucleic acid binding [GO:0003676 molecular_function] (1)                                                                                                                                                                                                                                                                    | Ribonuclease H-like domain [IPRO12327] (1); Domain of unknown function DU4283 [IPRO25558] (1)                                                                                                                                                                                                                            | -                                  | C_ushii_01231_mRNA_7.1        | -                               |
| GF000435 | 0                               | 1                          | 0                            | Hypothetical protein (1)                                                      |                                                                                                                                                                                                                                                                                                                             |                                                                                                                                                                                                                                                                                                                          | -                                  | C_ushii_01231_mRNA_6.1        | -                               |
| GF000434 | 0                               | 1                          | 0                            | Hypothetical protein (1)                                                      | iron ion binding [GO:0005506 molecular_function] (1); heme binding [GO:0020037 molecular_function] (1); oxidation-reduction process [GO:005114 biological_process] (1); oxidoreductase activity, acting on paired donors, with incorporation or reduction of molecular oxygen [GO:0016705 molecular_function] (1)           | Cytochrome P450 [IPRO01128] (1)                                                                                                                                                                                                                                                                                          | -                                  | C_ushii_01231_mRNA_5.1        | -                               |
| GF000433 | 0                               | 1                          | 0                            | Cytochrome P450 (1)                                                           | oxidoreductase activity, acting on paired donors, with incorporation or reduction of molecular oxygen [GO:0016705 molecular_function] (1); oxidation-reduction process [GO:005114 biological_process] (1); heme binding [GO:0020037 molecular_function] (1); iron ion binding [GO:0005506 molecular_function] (1)           | Cytochrome P450, E-class, group I [IPRO02401] (1); Cytochrome P450, conserved site [IPRO17972] (1); Cytochrome P450 [IPRO01128] (1)                                                                                                                                                                                      | -                                  | C_ushii_01231_mRNA_3.1        | -                               |
| GF000432 | 0                               | 1                          | 0                            | Hypothetical protein (1)                                                      |                                                                                                                                                                                                                                                                                                                             |                                                                                                                                                                                                                                                                                                                          | -                                  | C_ushii_01231_mRNA_13.1       | -                               |
| GF000431 | 0                               | 1                          | 0                            | Hypothetical protein (1)                                                      |                                                                                                                                                                                                                                                                                                                             |                                                                                                                                                                                                                                                                                                                          | -                                  | C_ushii_01231_mRNA_10.1       | -                               |
| GF000430 | 0                               | 1                          | 0                            | Hypothetical protein (1)                                                      |                                                                                                                                                                                                                                                                                                                             |                                                                                                                                                                                                                                                                                                                          | -                                  | C_ushii_01230_mRNA_7.1        | -                               |
| GF000429 | 0                               | 1                          | 0                            | Hypothetical protein (1)                                                      |                                                                                                                                                                                                                                                                                                                             |                                                                                                                                                                                                                                                                                                                          | -                                  | C_ushii_01230_mRNA_6.1        | -                               |
| GF000428 | 0                               | 1                          | 0                            | Two-component response regulator ARR22 (1)                                    | phosphorelay signal transduction system [GO:0000160 biological_process] (1)                                                                                                                                                                                                                                                 | Signal transduction response regulator, receiver domain [IPRO01789] (1); CheY-like superfamily [IPRO11000] (1)                                                                                                                                                                                                           | -                                  | C_ushii_01230_mRNA_2.1        | -                               |
| GF000427 | 0                               | 1                          | 0                            | Glutathione S-transferase tau 7, putative (1)                                 |                                                                                                                                                                                                                                                                                                                             | Glutathione S-transferase, C-terminal-like [IPRO10987] (1); Glutathione S-transferase, C-terminal [IPRO04046] (1)                                                                                                                                                                                                        | -                                  | C_ushii_01228_mRNA_11.1       | -                               |
| GF000426 | 0                               | 1                          | 0                            | Phytochrome interacting factor 1 (1)                                          |                                                                                                                                                                                                                                                                                                                             |                                                                                                                                                                                                                                                                                                                          | -                                  | C_ushii_01228_mRNA_1.1        | -                               |
| GF000425 | 0                               | 1                          | 0                            | Microtubule associated protein, MAP65/ASE1 family protein (1)                 | cytokinesis [GO:0000910 biological_process] (1); microtubule binding [GO:0000017 molecular_function] (1); microtubule cytoskeleton organization [GO:0000226 biological_process] (1)                                                                                                                                         | Microtubule-associated protein, MAP65/ASE1/PRC1 [IPRO07145] (1)                                                                                                                                                                                                                                                          | -                                  | C_ushii_01227_mRNA_9.1        | -                               |
| GF000424 | 0                               | 1                          | 0                            | Tetranucleotide repeat (TPR)-like superfamily protein, putative isoform 3 (1) | nucleus [GO:0005634 cellular_component] (1); cell cycle [GO:0007049 biological_process] (1); protein binding [GO:0005515 molecular_function] (1)                                                                                                                                                                            | Penetrating peptide repeat [IPRO02885] (1); Tetranucleotide-like helical domain [IPRO11990] (1); Cdk-activating kinase assembly factor MAT1/TB3 [IPRO04575] (1)                                                                                                                                                          | -                                  | C_ushii_01226_mRNA_6.1        | -                               |
| GF000423 | 0                               | 1                          | 0                            | DNA-directed RNA polymerase (1)                                               | transcription, DNA-templated [GO:0006351 biological_process] (1); DNA-directed RNA polymerase activity [GO:0003899 molecular_function] (1); DNA binding [GO:0003677 molecular_function] (1)                                                                                                                                 | DNA-directed RNA polymerase, helix hairpin domain [IPRO04075] (1); DNA-directed RNA polymerase, phage-type [IPRO02092] (1)                                                                                                                                                                                               | -                                  | C_ushii_01226_mRNA_4.1        | -                               |
| GF000422 | 0                               | 1                          | 0                            | Hypothetical protein (1)                                                      | integral component of membrane [GO:0016021 cellular_component] (1); zinc ion binding [GO:0000270 molecular_function] (1)                                                                                                                                                                                                    | Notouapain (TM98) [IPRO04240] (1); DW domain [IPRO03867] (1)                                                                                                                                                                                                                                                             | -                                  | C_ushii_01226_mRNA_3.1        | -                               |
| GF000421 | 0                               | 1                          | 0                            | Hypothetical protein (1)                                                      |                                                                                                                                                                                                                                                                                                                             | LysM domain [IPRO14392] (1)                                                                                                                                                                                                                                                                                              | -                                  | C_ushii_01225_mRNA_1.1        | -                               |
| GF000420 | 0                               | 1                          | 0                            | Integrase (1)                                                                 |                                                                                                                                                                                                                                                                                                                             | GAG-pro-integrase domain [IPRO25724] (1)                                                                                                                                                                                                                                                                                 | -                                  | C_ushii_01224_mRNA_6.1        | -                               |

| ID       | Num. in <i>C. crotolariae</i> | Num. in <i>C. arbutus</i> | Num. in <i>P. trifolium</i> | Gene                                                            | GO                                                                                                                                                                                                                                                                                                                                                                                                              | InterPro                                                                                                                                                                                                                                                                                                                                                    | Members in <i>C. crotolariae</i> | Members in <i>C. arbutus</i> | Members in <i>P. trifolium</i> |
|----------|-------------------------------|---------------------------|-----------------------------|-----------------------------------------------------------------|-----------------------------------------------------------------------------------------------------------------------------------------------------------------------------------------------------------------------------------------------------------------------------------------------------------------------------------------------------------------------------------------------------------------|-------------------------------------------------------------------------------------------------------------------------------------------------------------------------------------------------------------------------------------------------------------------------------------------------------------------------------------------------------------|----------------------------------|------------------------------|--------------------------------|
| GF004019 | 0                             | 1                         | 0                           | Hypothetical protein (1)                                        |                                                                                                                                                                                                                                                                                                                                                                                                                 | Sucrose-phosphate synthase [IPR000380]                                                                                                                                                                                                                                                                                                                      |                                  | C_uni01224_mRNA_3,1          | -                              |
| GF004018 | 0                             | 1                         | 0                           | Hypothetical protein (1)                                        |                                                                                                                                                                                                                                                                                                                                                                                                                 | (1); HA2-like domain [IPR023241] (1)                                                                                                                                                                                                                                                                                                                        |                                  | C_uni01223_mRNA_5,1          | -                              |
| GF004017 | 0                             | 1                         | 0                           | Hypothetical protein (1)                                        |                                                                                                                                                                                                                                                                                                                                                                                                                 |                                                                                                                                                                                                                                                                                                                                                             |                                  | C_uni01223_mRNA_2,1          | -                              |
| GF004016 | 0                             | 1                         | 0                           | Hypothetical protein (1)                                        |                                                                                                                                                                                                                                                                                                                                                                                                                 |                                                                                                                                                                                                                                                                                                                                                             |                                  | C_uni01222_mRNA_8,1          | -                              |
| GF004015 | 0                             | 1                         | 0                           | Hypothetical protein (1)                                        | oxidoreductase activity [GO:0016491 molecular_function] (1); metabolic process [GO:0008152 biological_process] (1)                                                                                                                                                                                                                                                                                              | Short-chain dehydrogenase/reductase SDR [IPR001981] (1); Glucosylated dehydrogenase [IPR023471] (1); NAD(P)-binding domain [IPR016040] (1)                                                                                                                                                                                                                  |                                  | C_uni01221_mRNA_8,1          | -                              |
| GF004014 | 0                             | 1                         | 0                           | Hypothetical protein (1)                                        |                                                                                                                                                                                                                                                                                                                                                                                                                 |                                                                                                                                                                                                                                                                                                                                                             |                                  | C_uni01221_mRNA_1,1          | -                              |
| GF004013 | 0                             | 1                         | 0                           | Hypothetical protein (1)                                        |                                                                                                                                                                                                                                                                                                                                                                                                                 |                                                                                                                                                                                                                                                                                                                                                             |                                  | C_uni01220_mRNA_2,1          | -                              |
| GF004012 | 0                             | 1                         | 0                           | Hypothetical protein (1)                                        |                                                                                                                                                                                                                                                                                                                                                                                                                 |                                                                                                                                                                                                                                                                                                                                                             |                                  | C_uni01219_mRNA_5,1          | -                              |
| GF004011 | 0                             | 1                         | 0                           | Hypothetical protein (1)                                        |                                                                                                                                                                                                                                                                                                                                                                                                                 |                                                                                                                                                                                                                                                                                                                                                             |                                  | C_uni01219_mRNA_4,1          | -                              |
| GF004010 | 0                             | 1                         | 0                           | Hypothetical protein (1)                                        |                                                                                                                                                                                                                                                                                                                                                                                                                 |                                                                                                                                                                                                                                                                                                                                                             |                                  | C_uni01219_mRNA_2,1          | -                              |
| GF004009 | 0                             | 1                         | 0                           | Hypothetical protein (1)                                        |                                                                                                                                                                                                                                                                                                                                                                                                                 |                                                                                                                                                                                                                                                                                                                                                             |                                  | C_uni01219_mRNA_11,1         | -                              |
| GF004008 | 0                             | 1                         | 0                           | Hypothetical protein (1)                                        |                                                                                                                                                                                                                                                                                                                                                                                                                 | Plant organellar RNA recognition domain [IPR021099] (1)                                                                                                                                                                                                                                                                                                     |                                  | C_uni01218_mRNA_9,1          | -                              |
| GF004007 | 0                             | 1                         | 0                           | Hypothetical protein (1)                                        |                                                                                                                                                                                                                                                                                                                                                                                                                 |                                                                                                                                                                                                                                                                                                                                                             |                                  | C_uni01218_mRNA_7,1          | -                              |
| GF004006 | 0                             | 1                         | 0                           | ATP-dependent zinc metalloprotease FTSH 2, chloroplast (1)      | heme binding [GO:002037 molecular_function] (1); response to oxidative stress [GO:0006979 biological_process] (1); metalloendopeptidase activity [GO:0004222 molecular_function] (1); peptidase activity [GO:0004601 molecular_function] (1); proteolysis [GO:0006508 biological_process] (1); oxidation-reduction process [GO:0055114 biological_process] (1); ATP binding [GO:0005524 molecular_function] (1) | ATPase, AAA-type, conserved site [IPR009601] (1); Haem peroxidase [IPR010255] (1); Peptidase M41 [IPR000642] (1); AAA-ATPase domain [IPR001931] (1); Plant peroxidase [IPR000821] (1); Haem peroxidase, plant/fungal/bacterial [IPR020216] (1); P-loop containing nucleoside triphosphate hydrolase [IPR027417] (1); ATPase, AAA-type, core [IPR003959] (1) |                                  | C_uni01218_mRNA_4,1          | -                              |
| GF004005 | 0                             | 1                         | 0                           | Hypothetical protein (1)                                        |                                                                                                                                                                                                                                                                                                                                                                                                                 | Domain of unknown function DUF4283 [IPR025588] (1)                                                                                                                                                                                                                                                                                                          |                                  | C_uni01218_mRNA_12,1         | -                              |
| GF004004 | 0                             | 1                         | 0                           | Hypothetical protein (1)                                        |                                                                                                                                                                                                                                                                                                                                                                                                                 |                                                                                                                                                                                                                                                                                                                                                             |                                  | C_uni01218_mRNA_1,1          | -                              |
| GF004003 | 0                             | 1                         | 0                           | Hypothetical protein (1)                                        |                                                                                                                                                                                                                                                                                                                                                                                                                 |                                                                                                                                                                                                                                                                                                                                                             |                                  | C_uni01217_mRNA_9,1          | -                              |
| GF004002 | 0                             | 1                         | 0                           | Hypothetical protein (1)                                        |                                                                                                                                                                                                                                                                                                                                                                                                                 |                                                                                                                                                                                                                                                                                                                                                             |                                  | C_uni01217_mRNA_4,1          | -                              |
| GF004001 | 0                             | 1                         | 0                           | Hypothetical protein (1)                                        | nucleic acid binding [GO:0003676 molecular_function] (1); zinc ion binding [GO:0000870 molecular_function] (1)                                                                                                                                                                                                                                                                                                  | Zinc finger, CCHC-type [IPR001878] (1)                                                                                                                                                                                                                                                                                                                      |                                  | C_uni01217_mRNA_2,1          | -                              |
| GF004000 | 0                             | 1                         | 0                           | Cytokinin riboside 5'-monophosphate phosphoribohydrolase (1)    |                                                                                                                                                                                                                                                                                                                                                                                                                 | LOG family [IPR031100] (1)                                                                                                                                                                                                                                                                                                                                  |                                  | C_uni01216_mRNA_8,1          | -                              |
| GF004009 | 0                             | 1                         | 0                           | Hypothetical protein (1)                                        |                                                                                                                                                                                                                                                                                                                                                                                                                 | Retransposon gag domain [IPR005162] (1)                                                                                                                                                                                                                                                                                                                     |                                  | C_uni01216_mRNA_6,1          | -                              |
| GF004008 | 0                             | 1                         | 0                           | Hypothetical protein (1)                                        |                                                                                                                                                                                                                                                                                                                                                                                                                 |                                                                                                                                                                                                                                                                                                                                                             |                                  | C_uni01216_mRNA_2,1          | -                              |
| GF004007 | 0                             | 1                         | 0                           | Hypothetical protein (1)                                        |                                                                                                                                                                                                                                                                                                                                                                                                                 |                                                                                                                                                                                                                                                                                                                                                             |                                  | C_uni01216_mRNA_11,1         | -                              |
| GF004006 | 0                             | 1                         | 0                           | Hypothetical protein (1)                                        |                                                                                                                                                                                                                                                                                                                                                                                                                 |                                                                                                                                                                                                                                                                                                                                                             |                                  | C_uni01216_mRNA_10,1         | -                              |
| GF004005 | 0                             | 1                         | 0                           | Hypothetical protein (1)                                        |                                                                                                                                                                                                                                                                                                                                                                                                                 |                                                                                                                                                                                                                                                                                                                                                             |                                  | C_uni01215_mRNA_9,1          | -                              |
| GF004004 | 0                             | 1                         | 0                           | Hypothetical protein (1)                                        |                                                                                                                                                                                                                                                                                                                                                                                                                 |                                                                                                                                                                                                                                                                                                                                                             |                                  | C_uni01215_mRNA_5,1          | -                              |
| GF004003 | 0                             | 1                         | 0                           | Hypothetical protein (1)                                        |                                                                                                                                                                                                                                                                                                                                                                                                                 |                                                                                                                                                                                                                                                                                                                                                             |                                  | C_uni01215_mRNA_4,1          | -                              |
| GF004002 | 0                             | 1                         | 0                           | Hypothetical protein (1)                                        |                                                                                                                                                                                                                                                                                                                                                                                                                 |                                                                                                                                                                                                                                                                                                                                                             |                                  | C_uni01215_mRNA_3,1          | -                              |
| GF004001 | 0                             | 1                         | 0                           | Hypothetical protein (1)                                        |                                                                                                                                                                                                                                                                                                                                                                                                                 |                                                                                                                                                                                                                                                                                                                                                             |                                  | C_uni01215_mRNA_2,1          | -                              |
| GF004000 | 0                             | 1                         | 0                           | Hypothetical protein (1)                                        |                                                                                                                                                                                                                                                                                                                                                                                                                 |                                                                                                                                                                                                                                                                                                                                                             |                                  | C_uni01215_mRNA_10,1         | -                              |
| GF004009 | 0                             | 1                         | 0                           | Hypothetical protein (1)                                        |                                                                                                                                                                                                                                                                                                                                                                                                                 | Chloramphenicol acetyltransferase-like domain [IPR023213] (1)                                                                                                                                                                                                                                                                                               |                                  | C_uni01214_mRNA_6,1          | -                              |
| GF004008 | 0                             | 1                         | 0                           | Hypothetical protein (1)                                        | cysteine biosynthetic process from serine [GO:0006335 biological_process] (1); serine O-acetyltransferase activity [GO:0009001 molecular_function] (1); cytoplasm [GO:0005737 cellular_component] (1)                                                                                                                                                                                                           | Serine acetyltransferase, N-terminal [IPR010493] (1)                                                                                                                                                                                                                                                                                                        |                                  | C_uni01214_mRNA_5,1          | -                              |
| GF004007 | 0                             | 1                         | 0                           | Hypothetical protein (1)                                        |                                                                                                                                                                                                                                                                                                                                                                                                                 |                                                                                                                                                                                                                                                                                                                                                             |                                  | C_uni01214_mRNA_4,1          | -                              |
| GF004006 | 0                             | 1                         | 0                           | Hypothetical protein (1)                                        |                                                                                                                                                                                                                                                                                                                                                                                                                 |                                                                                                                                                                                                                                                                                                                                                             |                                  | C_uni01214_mRNA_1,1          | -                              |
| GF004005 | 0                             | 1                         | 0                           | Late embryogenesis abundant (LEA)                               |                                                                                                                                                                                                                                                                                                                                                                                                                 |                                                                                                                                                                                                                                                                                                                                                             |                                  | C_uni01213_mRNA_8,1          | -                              |
| GF004004 | 0                             | 1                         | 0                           | hydroxyproline-rich glycoprotein family, putative isoform 1 (1) |                                                                                                                                                                                                                                                                                                                                                                                                                 |                                                                                                                                                                                                                                                                                                                                                             |                                  | C_uni01213_mRNA_4,1          | -                              |
| GF004003 | 0                             | 1                         | 0                           | Hypothetical protein (1)                                        |                                                                                                                                                                                                                                                                                                                                                                                                                 |                                                                                                                                                                                                                                                                                                                                                             |                                  | C_uni01213_mRNA_3,1          | -                              |
| GF004002 | 0                             | 1                         | 0                           | Hypothetical protein (1)                                        |                                                                                                                                                                                                                                                                                                                                                                                                                 |                                                                                                                                                                                                                                                                                                                                                             |                                  | C_uni01212_mRNA_8,1          | -                              |
| GF004001 | 0                             | 1                         | 0                           | Hypothetical protein (1)                                        |                                                                                                                                                                                                                                                                                                                                                                                                                 |                                                                                                                                                                                                                                                                                                                                                             |                                  | C_uni01212_mRNA_13,1         | -                              |
| GF004000 | 0                             | 1                         | 0                           | Peroxisomal membrane carrier protein (1)                        |                                                                                                                                                                                                                                                                                                                                                                                                                 | Mitochondrial substrate/solute carrier [IPR018108] (1); Mitochondrial carrier domain [IPR023395] (1)                                                                                                                                                                                                                                                        |                                  | C_uni01212_mRNA_10,1         | -                              |
| GF004009 | 0                             | 1                         | 0                           | Hypothetical protein (1)                                        |                                                                                                                                                                                                                                                                                                                                                                                                                 |                                                                                                                                                                                                                                                                                                                                                             |                                  | C_uni01212_mRNA_1,1          | -                              |
| GF004008 | 0                             | 1                         | 0                           | Hypothetical protein (1)                                        | binding [GO:0005488 molecular_function] (1)                                                                                                                                                                                                                                                                                                                                                                     | Me25-like [IPR013878] (1); Armadillo-like helical [IPR011989] (1); Armadillo-type fold [IPR016024] (1)                                                                                                                                                                                                                                                      |                                  | C_uni01211_mRNA_7,1          | -                              |
| GF004007 | 0                             | 1                         | 0                           | Hypothetical protein (1)                                        | diacylglycerol O-acyltransferase activity [GO:0004144 molecular_function] (1); structural constituent of ribosome [GO:0003735 molecular_function] (1); intracellular [GO:0009622 cellular_component] (1); translation [GO:0006412 biological_process] (1); ribosome [GO:0005840 cellular_component] (1)                                                                                                         | O-acyltransferase WSD1, C-terminal [IPR009721] (1)                                                                                                                                                                                                                                                                                                          |                                  | C_uni01211_mRNA_6,1          | -                              |
| GF004006 | 0                             | 1                         | 0                           | Hypothetical protein (1)                                        |                                                                                                                                                                                                                                                                                                                                                                                                                 | Ribosomal protein L14 [IPR002784] (1)                                                                                                                                                                                                                                                                                                                       |                                  | C_uni01210_mRNA_7,1          | -                              |
| GF004005 | 0                             | 1                         | 0                           | Hypothetical protein (1)                                        |                                                                                                                                                                                                                                                                                                                                                                                                                 | Translation protein SH3-like domain [IPR008911] (1); Ribosomal protein L2 domain 2 [IPR014722] (1)                                                                                                                                                                                                                                                          |                                  | C_uni01210_mRNA_6,1          | -                              |
| GF004004 | 0                             | 1                         | 0                           | Hypothetical protein (1)                                        |                                                                                                                                                                                                                                                                                                                                                                                                                 |                                                                                                                                                                                                                                                                                                                                                             |                                  | C_uni01210_mRNA_5,1          | -                              |
| GF004003 | 0                             | 1                         | 0                           | Hypothetical protein (1)                                        |                                                                                                                                                                                                                                                                                                                                                                                                                 |                                                                                                                                                                                                                                                                                                                                                             |                                  | C_uni01209_mRNA_7,1          | -                              |
| GF004002 | 0                             | 1                         | 0                           | Cytochrome P450 family protein (1)                              | oxidation-reduction process [GO:0055114 biological_process] (1); oxidoreductase activity, acting on paired donors, with incorporation or reduction of molecular oxygen [GO:0016705 molecular_function] (1); heme binding [GO:0020037 molecular_function] (1); iron ion binding [GO:0005506 molecular_function] (1)                                                                                              | Cytochrome P450 [IPR011281] (1); Cytochrome P450, E-class, group I [IPR002401] (1)                                                                                                                                                                                                                                                                          |                                  | C_uni01209_mRNA_6,1          | -                              |
| GF004001 | 0                             | 1                         | 0                           | Cytokinin riboside 5'-monophosphate phosphoribohydrolase (1)    |                                                                                                                                                                                                                                                                                                                                                                                                                 | Cytokinin riboside 5'-monophosphate phosphoribohydrolase LOG [IPR005269] (1); LOG family [IPR031100] (1)                                                                                                                                                                                                                                                    |                                  | C_uni01209_mRNA_10,1         | -                              |
| GF004000 | 0                             | 1                         | 0                           | Hypothetical protein (1)                                        |                                                                                                                                                                                                                                                                                                                                                                                                                 |                                                                                                                                                                                                                                                                                                                                                             |                                  | C_uni01208_mRNA_7,1          | -                              |
| GF004009 | 0                             | 1                         | 0                           | Lectin (1)                                                      | carbohydrate binding [GO:0030246 molecular_function] (1)                                                                                                                                                                                                                                                                                                                                                        | Legume lectin domain [IPR001220] (1); Concavamin A-like lectin/galactinase domain [IPR013320] (1); Lectin [IPR016363] (1); Legume lectin, alpha chain, conserved site [IPR009851] (1)                                                                                                                                                                       |                                  | C_uni01208_mRNA_2,1          | -                              |
| GF004008 | 0                             | 1                         | 0                           | Hypothetical protein (1)                                        | small GTPase mediated signal transduction [GO:0007264 biological_process] (1); GTP binding [GO:0005525 molecular_function] (1)                                                                                                                                                                                                                                                                                  | P-loop containing nucleoside triphosphate hydrolase [IPR027417] (1); Small GTPase superfamily [IPR001806] (1)                                                                                                                                                                                                                                               |                                  | C_uni01207_mRNA_6,1          | -                              |
| GF004007 | 0                             | 1                         | 0                           | Hypothetical protein (1)                                        | small GTPase mediated signal transduction [GO:0007264 biological_process] (1); GTP binding [GO:0005525 molecular_function] (1)                                                                                                                                                                                                                                                                                  | Small GTPase superfamily [IPR001806] (1); P-loop containing nucleoside triphosphate hydrolase [IPR027417] (1)                                                                                                                                                                                                                                               |                                  | C_uni01207_mRNA_4,1          | -                              |
| GF004006 | 0                             | 1                         | 0                           | Hypothetical protein (1)                                        |                                                                                                                                                                                                                                                                                                                                                                                                                 |                                                                                                                                                                                                                                                                                                                                                             |                                  | C_uni01206_mRNA_3,1          | -                              |
| GF004005 | 0                             | 1                         | 0                           | Hypothetical protein (1)                                        | methyltransferase activity [GO:0008168 molecular_function] (1)                                                                                                                                                                                                                                                                                                                                                  | S-adenosyl-4-methanone-dependent methyltransferase [IPR029063] (1); SAM dependent carbon methyltransferase [IPR005299] (1)                                                                                                                                                                                                                                  |                                  | C_uni01205_mRNA_5,1          | -                              |
| GF004004 | 0                             | 1                         | 0                           | Hypothetical protein (1)                                        |                                                                                                                                                                                                                                                                                                                                                                                                                 | Lectin-rich repeat domain, L domain-like [IPR023075] (1)                                                                                                                                                                                                                                                                                                    |                                  | C_uni01205_mRNA_1,1          | -                              |
| GF004003 | 0                             | 1                         | 0                           | Hypothetical protein (1)                                        |                                                                                                                                                                                                                                                                                                                                                                                                                 | Peptide repeat [IPR028851] (1)                                                                                                                                                                                                                                                                                                                              |                                  | C_uni01204_mRNA_2,1          | -                              |
| GF004002 | 0                             | 1                         | 0                           | Hypothetical protein (1)                                        | DNA-directed RNA polymerase activity [GO:0003999 molecular_function] (1); DNA binding [GO:0003677 molecular_function] (1); polysaccharide binding [GO:0003027 molecular_function] (1); transcription, DNA-templated [GO:0006351 biological_process] (1)                                                                                                                                                         | RNA polymerase Rpb1, domain 5 [IPR007811] (1); Protein kinase-like domain [IPR011099] (1); Wall-associated receptor kinase, galacturonan-binding domain [IPR023287] (1)                                                                                                                                                                                     |                                  | C_uni01203_mRNA_9,1          | -                              |
| GF004001 | 0                             | 1                         | 0                           | Hypothetical protein (1)                                        | DNA binding [GO:0003677 molecular_function] (1)                                                                                                                                                                                                                                                                                                                                                                 | hAT-like transposase, RNase-H fold [IPR025525] (1)                                                                                                                                                                                                                                                                                                          |                                  | C_uni01203_mRNA_8,1          | -                              |
| GF004000 | 0                             | 1                         | 0                           | LRR receptor-like kinase family protein (1)                     |                                                                                                                                                                                                                                                                                                                                                                                                                 | Lectin-rich repeat domain, L domain-like [IPR023075] (1)                                                                                                                                                                                                                                                                                                    |                                  | C_uni01203_mRNA_7,1          | -                              |
| GF004009 | 0                             | 1                         | 0                           | Hypothetical protein (1)                                        | nucleic acid binding [GO:0003676 molecular_function] (1); DNA integration [GO:0015074 biological_process] (1)                                                                                                                                                                                                                                                                                                   | Lectin-rich repeat domain, L domain-like [IPR023075] (1); Ribonuclease H-like domain [IPR023371] (1); Integrase, catalytic core [IPR001584] (1)                                                                                                                                                                                                             |                                  | C_uni01203_mRNA_2,1          | -                              |
| GF004008 | 0                             | 1                         | 0                           | Hypothetical protein (1)                                        | cysteine-type peptidase activity [GO:0008234 molecular_function] (1); proteolysis [GO:0006508 biological_process] (1)                                                                                                                                                                                                                                                                                           | Ulp1 protease family, C-terminal catalytic domain [IPR003653] (1); Probable proteolysin [GO:0006508 biological_process] (1)                                                                                                                                                                                                                                 |                                  | C_uni01201_mRNA_3,1          | -                              |
| GF004007 | 0                             | 1                         | 0                           | Hypothetical protein (1)                                        | pectinesterase activity [GO:0003099 molecular_function] (1); cell wall modification [GO:0004245 biological_process] (1); cell wall [GO:0005818 cellular_component] (1)                                                                                                                                                                                                                                          | Pectinesterase, catalytic [IPR000070] (1); Pectin lyase fold [IPR012341] (1)                                                                                                                                                                                                                                                                                |                                  | C_uni01201_mRNA_1,1          | -                              |
| GF004006 | 0                             | 1                         | 0                           | Hypothetical protein (1)                                        |                                                                                                                                                                                                                                                                                                                                                                                                                 | Myosubulin family [IPR030564] (1); Myosubulin-like phosphatase domain [IPR010569] (1); Protein-cysteine phosphatase-like [IPR029021] (1)                                                                                                                                                                                                                    |                                  | C_uni01199_mRNA_5,1          | -                              |
| GF004005 | 0                             | 1                         | 0                           | Hypothetical protein (1)                                        |                                                                                                                                                                                                                                                                                                                                                                                                                 |                                                                                                                                                                                                                                                                                                                                                             |                                  | C_uni01199_mRNA_4,1          | -                              |
| GF004004 | 0                             | 1                         | 0                           | Hypothetical protein (1)                                        |                                                                                                                                                                                                                                                                                                                                                                                                                 |                                                                                                                                                                                                                                                                                                                                                             |                                  | C_uni01199_mRNA_2,1          | -                              |
| GF004003 | 0                             | 1                         | 0                           | Hypothetical protein (1)                                        |                                                                                                                                                                                                                                                                                                                                                                                                                 |                                                                                                                                                                                                                                                                                                                                                             |                                  | C_uni01199_mRNA_12,1         | -                              |
| GF004002 | 0                             | 1                         | 0                           | Hypothetical protein (1)                                        |                                                                                                                                                                                                                                                                                                                                                                                                                 |                                                                                                                                                                                                                                                                                                                                                             |                                  | C_uni01198_mRNA_9,1          | -                              |
| GF004001 | 0                             | 1                         | 0                           | Hypothetical protein (1)                                        |                                                                                                                                                                                                                                                                                                                                                                                                                 |                                                                                                                                                                                                                                                                                                                                                             |                                  | C_uni01198_mRNA_6,1          | -                              |
| GF004000 | 0                             | 1                         | 0                           | Hypothetical protein (1)                                        |                                                                                                                                                                                                                                                                                                                                                                                                                 |                                                                                                                                                                                                                                                                                                                                                             |                                  | C_uni01198_mRNA_4,1          | -                              |
| GF004009 | 0                             | 1                         | 0                           | Hypothetical protein (1)                                        |                                                                                                                                                                                                                                                                                                                                                                                                                 |                                                                                                                                                                                                                                                                                                                                                             |                                  | C_uni01198_mRNA_3,1          | -                              |
| GF004008 | 0                             | 1                         | 0                           | Hypothetical protein (1)                                        | protein binding [GO:0005515 molecular_function] (1)                                                                                                                                                                                                                                                                                                                                                             | TRAF-like [IPR008974] (1); MATH/TRAF domain [IPR002083] (1)                                                                                                                                                                                                                                                                                                 |                                  | C_uni01197_mRNA_9,1          | -                              |

| ID        | Num. in C. crotolariae | Num. in C. canalis | Num. in P. trifidatus | Note | GO                                                                   | InterPro                                                                                                                                                                                                                                                                                                                                                                                                                                                                                                                                   | Members in C. crotolariae                                                                                                                                                                                                                                                                                                                           | Members in C. canalis  | Members in P. trifidatus |
|-----------|------------------------|--------------------|-----------------------|------|----------------------------------------------------------------------|--------------------------------------------------------------------------------------------------------------------------------------------------------------------------------------------------------------------------------------------------------------------------------------------------------------------------------------------------------------------------------------------------------------------------------------------------------------------------------------------------------------------------------------------|-----------------------------------------------------------------------------------------------------------------------------------------------------------------------------------------------------------------------------------------------------------------------------------------------------------------------------------------------------|------------------------|--------------------------|
| GF0040346 | 0                      | 1                  | 0                     | 0    | Ubiquitin carboxyl-terminal hydrolase 12 (1)                         | protein binding [GO:0005515 molecular_function] (1)                                                                                                                                                                                                                                                                                                                                                                                                                                                                                        | MATH/TRAF domain [IPR020283] (1); TRAF-like [IPR08974] (1)                                                                                                                                                                                                                                                                                          | C_ush19_0197_mRNA_8.1  | -                        |
| GF0040345 | 0                      | 1                  | 0                     | 0    | Hypothetical protein (1)                                             | -                                                                                                                                                                                                                                                                                                                                                                                                                                                                                                                                          | -                                                                                                                                                                                                                                                                                                                                                   | C_ush19_0197_mRNA_6.1  | -                        |
| GF0040344 | 0                      | 1                  | 0                     | 0    | Ubiquitin carboxyl-terminal hydrolase 13 (1)                         | protein binding [GO:0005515 molecular_function] (1)                                                                                                                                                                                                                                                                                                                                                                                                                                                                                        | MATH/TRAF domain [IPR020283] (1); TRAF-like [IPR08974] (1)                                                                                                                                                                                                                                                                                          | C_ush19_0197_mRNA_10.1 | -                        |
| GF0040343 | 0                      | 1                  | 0                     | 0    | Hypothetical protein (1)                                             | -                                                                                                                                                                                                                                                                                                                                                                                                                                                                                                                                          | -                                                                                                                                                                                                                                                                                                                                                   | C_ush19_0196_mRNA_14.1 | -                        |
| GF0040342 | 0                      | 1                  | 0                     | 0    | Hypothetical protein (1)                                             | -                                                                                                                                                                                                                                                                                                                                                                                                                                                                                                                                          | -                                                                                                                                                                                                                                                                                                                                                   | C_ush19_0196_mRNA_12.1 | -                        |
| GF0040341 | 0                      | 1                  | 0                     | 0    | Hypothetical protein (1)                                             | -                                                                                                                                                                                                                                                                                                                                                                                                                                                                                                                                          | -                                                                                                                                                                                                                                                                                                                                                   | C_ush19_0195_mRNA_9.1  | -                        |
| GF0040340 | 0                      | 1                  | 0                     | 0    | Hypothetical protein (1)                                             | zinc ion binding [GO:0008270 molecular_function] (1); nucleic acid binding [GO:0003676 molecular_function] (1)                                                                                                                                                                                                                                                                                                                                                                                                                             | Zinc finger, U1-type [IPR003604] (1)                                                                                                                                                                                                                                                                                                                | C_ush19_0195_mRNA_2.1  | -                        |
| GF0040339 | 0                      | 1                  | 0                     | 0    | Translation initiation factor IF-3 (1)                               | translation initiation factor activity [GO:0003743 molecular_function] (1); translational initiation [GO:0006413 biological_process] (1)                                                                                                                                                                                                                                                                                                                                                                                                   | Translation initiation factor 3 [IPR001288] (1); Translation initiation factor 3, C-terminal [IPR019815] (1)                                                                                                                                                                                                                                        | C_ush19_0195_mRNA_14.1 | -                        |
| GF0040338 | 0                      | 1                  | 0                     | 0    | Translation initiation factor IF-3 (1)                               | translation initiation factor activity [GO:0003743 molecular_function] (1); translational initiation [GO:0006413 biological_process] (1)                                                                                                                                                                                                                                                                                                                                                                                                   | Translation initiation factor 3 [IPR001288] (1); Translation initiation factor 3, N-terminal [IPR019814] (1)                                                                                                                                                                                                                                        | C_ush19_0195_mRNA_13.1 | -                        |
| GF0040337 | 0                      | 1                  | 0                     | 0    | Hypothetical protein (1)                                             | -                                                                                                                                                                                                                                                                                                                                                                                                                                                                                                                                          | -                                                                                                                                                                                                                                                                                                                                                   | C_ush19_0195_mRNA_12.1 | -                        |
| GF0040336 | 0                      | 1                  | 0                     | 0    | Hypothetical protein (1)                                             | -                                                                                                                                                                                                                                                                                                                                                                                                                                                                                                                                          | -                                                                                                                                                                                                                                                                                                                                                   | C_ush19_0194_mRNA_9.1  | -                        |
| GF0040335 | 0                      | 1                  | 0                     | 0    | Hypothetical protein (1)                                             | Retransposon protein, putative, Ty1-copia subclass (1)                                                                                                                                                                                                                                                                                                                                                                                                                                                                                     | -                                                                                                                                                                                                                                                                                                                                                   | C_ush19_0194_mRNA_6.1  | -                        |
| GF0040334 | 0                      | 1                  | 0                     | 0    | Hypothetical protein (1)                                             | -                                                                                                                                                                                                                                                                                                                                                                                                                                                                                                                                          | -                                                                                                                                                                                                                                                                                                                                                   | C_ush19_0194_mRNA_5.1  | -                        |
| GF0040333 | 0                      | 1                  | 0                     | 0    | Hypothetical protein (1)                                             | -                                                                                                                                                                                                                                                                                                                                                                                                                                                                                                                                          | -                                                                                                                                                                                                                                                                                                                                                   | C_ush19_0194_mRNA_3.1  | -                        |
| GF0040332 | 0                      | 1                  | 0                     | 0    | Hypothetical protein (1)                                             | -                                                                                                                                                                                                                                                                                                                                                                                                                                                                                                                                          | -                                                                                                                                                                                                                                                                                                                                                   | C_ush19_0194_mRNA_1.1  | -                        |
| GF0040331 | 0                      | 1                  | 0                     | 0    | Hypothetical protein (1)                                             | -                                                                                                                                                                                                                                                                                                                                                                                                                                                                                                                                          | -                                                                                                                                                                                                                                                                                                                                                   | C_ush19_0193_mRNA_5.1  | -                        |
| GF0040330 | 0                      | 1                  | 0                     | 0    | Naringenin-chalcone synthase (1)                                     | metabolic process [GO:0008152 biological_process] (1); catalytic activity [GO:0003224 molecular_function] (1); biosynthetic process [GO:0009058 biological_process] (1); transfrase activity, transferring acyl groups [GO:0016746 molecular_function] (1)                                                                                                                                                                                                                                                                                 | Chalcone/sitbene synthase, N-terminal [IPR01099] (1); Chalcone/sitbene synthase, C-terminal [IPR012328] (1); Thiolase-like [IPR01609] (1); Chalcone/sitbene synthase, active site [IPR018088] (1)                                                                                                                                                   | C_ush19_0193_mRNA_1.1  | -                        |
| GF0040329 | 0                      | 1                  | 0                     | 0    | Hypothetical protein (1)                                             | -                                                                                                                                                                                                                                                                                                                                                                                                                                                                                                                                          | -                                                                                                                                                                                                                                                                                                                                                   | C_ush19_0192_mRNA_5.1  | -                        |
| GF0040328 | 0                      | 1                  | 0                     | 0    | Hypothetical protein (1)                                             | -                                                                                                                                                                                                                                                                                                                                                                                                                                                                                                                                          | -                                                                                                                                                                                                                                                                                                                                                   | C_ush19_0191_mRNA_9.1  | -                        |
| GF0040327 | 0                      | 1                  | 0                     | 0    | Lysosomal beta glucosidase (1)                                       | carbohydrate metabolic process [GO:0005979 biological_process] (1); hydrolase activity, hydrolyzing O-glycosyl compounds [GO:0004555 molecular_function] (1)                                                                                                                                                                                                                                                                                                                                                                               | Glycoside hydrolase, family 3, N-terminal [IPR01764] (1); Glycoside hydrolase family 3, C-terminal domain [IPR02772] (1); Glycoside hydrolase family 3 [IPR026892] (1); Glycoside hydrolase superfamily [IPR017853] (1)                                                                                                                             | C_ush19_0191_mRNA_10.1 | -                        |
| GF0040326 | 0                      | 1                  | 0                     | 0    | Hypothetical protein (1)                                             | -                                                                                                                                                                                                                                                                                                                                                                                                                                                                                                                                          | -                                                                                                                                                                                                                                                                                                                                                   | C_ush19_0189_mRNA_9.1  | -                        |
| GF0040325 | 0                      | 1                  | 0                     | 0    | Hypothetical protein (1)                                             | -                                                                                                                                                                                                                                                                                                                                                                                                                                                                                                                                          | -                                                                                                                                                                                                                                                                                                                                                   | C_ush19_0189_mRNA_8.1  | -                        |
| GF0040324 | 0                      | 1                  | 0                     | 0    | Hypothetical protein (1)                                             | -                                                                                                                                                                                                                                                                                                                                                                                                                                                                                                                                          | -                                                                                                                                                                                                                                                                                                                                                   | C_ush19_0189_mRNA_11.1 | -                        |
| GF0040323 | 0                      | 1                  | 0                     | 0    | Hypothetical protein (1)                                             | -                                                                                                                                                                                                                                                                                                                                                                                                                                                                                                                                          | -                                                                                                                                                                                                                                                                                                                                                   | C_ush19_0189_mRNA_10.1 | -                        |
| GF0040322 | 0                      | 1                  | 0                     | 0    | Hypothetical protein (1)                                             | -                                                                                                                                                                                                                                                                                                                                                                                                                                                                                                                                          | -                                                                                                                                                                                                                                                                                                                                                   | C_ush19_0188_mRNA_7.1  | -                        |
| GF0040321 | 0                      | 1                  | 0                     | 0    | Hypothetical protein (1)                                             | -                                                                                                                                                                                                                                                                                                                                                                                                                                                                                                                                          | -                                                                                                                                                                                                                                                                                                                                                   | C_ush19_0187_mRNA_8.1  | -                        |
| GF0040320 | 0                      | 1                  | 0                     | 0    | TPR and ankyrin repeat-containing 1 (1)                              | hydrolase activity [GO:0016787 molecular_function] (1); ATP binding [GO:0005524 molecular_function] (1)                                                                                                                                                                                                                                                                                                                                                                                                                                    | UvrD-like DNA helicase, C-terminal [IPR014017] (1); P-loop containing nucleoside triphosphate hydrolase [IPR027417] (1)                                                                                                                                                                                                                             | C_ush19_0187_mRNA_7.1  | -                        |
| GF0040319 | 0                      | 1                  | 0                     | 0    | Hypothetical protein (1)                                             | -                                                                                                                                                                                                                                                                                                                                                                                                                                                                                                                                          | -                                                                                                                                                                                                                                                                                                                                                   | C_ush19_0187_mRNA_6.1  | -                        |
| GF0040318 | 0                      | 1                  | 0                     | 0    | Hypothetical protein (1)                                             | -                                                                                                                                                                                                                                                                                                                                                                                                                                                                                                                                          | -                                                                                                                                                                                                                                                                                                                                                   | C_ush19_0187_mRNA_5.1  | -                        |
| GF0040317 | 0                      | 1                  | 0                     | 0    | Hypothetical protein (1)                                             | -                                                                                                                                                                                                                                                                                                                                                                                                                                                                                                                                          | -                                                                                                                                                                                                                                                                                                                                                   | C_ush19_0187_mRNA_4.1  | -                        |
| GF0040316 | 0                      | 1                  | 0                     | 0    | Hypothetical protein (1)                                             | ATP binding [GO:0005524 molecular_function] (1)                                                                                                                                                                                                                                                                                                                                                                                                                                                                                            | P-loop containing nucleoside triphosphate hydrolase [IPR027417] (1); UvrD-like Helicase, ATP-binding domain [IPR014016] (1)                                                                                                                                                                                                                         | C_ush19_0187_mRNA_2.1  | -                        |
| GF0040315 | 0                      | 1                  | 0                     | 0    | Hypothetical protein (1)                                             | -                                                                                                                                                                                                                                                                                                                                                                                                                                                                                                                                          | -                                                                                                                                                                                                                                                                                                                                                   | C_ush19_0186_mRNA_9.1  | -                        |
| GF0040314 | 0                      | 1                  | 0                     | 0    | Transposon-like element Lys2.0 DNA (1)                               | regulation of transcription, DNA-templated [GO:0006355 biological_process] (1); zinc ion binding [GO:0008270 molecular_function] (1); nucleic acid binding [GO:0003676 molecular_function] (1)                                                                                                                                                                                                                                                                                                                                             | Zinc finger, CCHC-type [IPR001878] (1); FYVE/FAR1 family [IPR011052] (1); Zinc finger, SWIM-type [IPR007527] (1); Zinc finger, PMZ-type [IPR006564] (1)                                                                                                                                                                                             | C_ush19_0186_mRNA_2.1  | -                        |
| GF0040313 | 0                      | 1                  | 0                     | 0    | Hypothetical protein (1)                                             | -                                                                                                                                                                                                                                                                                                                                                                                                                                                                                                                                          | -                                                                                                                                                                                                                                                                                                                                                   | C_ush19_0185_mRNA_8.1  | -                        |
| GF0040312 | 0                      | 1                  | 0                     | 0    | Verrucium wilt resistance-like protein (1)                           | protein binding [GO:0005515 molecular_function] (1)                                                                                                                                                                                                                                                                                                                                                                                                                                                                                        | Leucine-rich repeat domain, I domain-like [IPR020375] (1); Leucine-rich repeat, typical subtype [IPR00359] (1); Leucine-rich repeat-containing N-terminal, plant-type [IPR013210] (1); Leucine-rich repeat [IPR001611] (1)                                                                                                                          | C_ush19_0185_mRNA_4.1  | -                        |
| GF0040311 | 0                      | 1                  | 0                     | 0    | Hypothetical protein (1)                                             | -                                                                                                                                                                                                                                                                                                                                                                                                                                                                                                                                          | -                                                                                                                                                                                                                                                                                                                                                   | C_ush19_0185_mRNA_3.1  | -                        |
| GF0040310 | 0                      | 1                  | 0                     | 0    | Hypothetical protein (1)                                             | -                                                                                                                                                                                                                                                                                                                                                                                                                                                                                                                                          | -                                                                                                                                                                                                                                                                                                                                                   | C_ush19_0184_mRNA_6.1  | -                        |
| GF0040309 | 0                      | 1                  | 0                     | 0    | Hypothetical protein (1)                                             | -                                                                                                                                                                                                                                                                                                                                                                                                                                                                                                                                          | -                                                                                                                                                                                                                                                                                                                                                   | C_ush19_0183_mRNA_9.1  | -                        |
| GF0040308 | 0                      | 1                  | 0                     | 0    | Hypothetical protein (1)                                             | -                                                                                                                                                                                                                                                                                                                                                                                                                                                                                                                                          | -                                                                                                                                                                                                                                                                                                                                                   | C_ush19_0183_mRNA_6.1  | -                        |
| GF0040307 | 0                      | 1                  | 0                     | 0    | Hypothetical protein (1)                                             | -                                                                                                                                                                                                                                                                                                                                                                                                                                                                                                                                          | -                                                                                                                                                                                                                                                                                                                                                   | C_ush19_0182_mRNA_8.1  | -                        |
| GF0040306 | 0                      | 1                  | 0                     | 0    | Hypothetical protein (1)                                             | -                                                                                                                                                                                                                                                                                                                                                                                                                                                                                                                                          | -                                                                                                                                                                                                                                                                                                                                                   | C_ush19_0182_mRNA_5.1  | -                        |
| GF0040305 | 0                      | 1                  | 0                     | 0    | Hypothetical protein (1)                                             | zinc ion binding [GO:0008270 molecular_function] (1); aspartic-type endopeptidase activity [GO:0004190 molecular_function] (1); nucleic acid binding [GO:0003676 molecular_function] (1); proteolysis [GO:0006958 biological_process] (1); protein phosphorylation [GO:0006468 biological_process] (1); protein kinase activity [GO:0004672 molecular_function] (1); ATP binding [GO:0005524 molecular_function] (1); polysaccharide binding [GO:00030247 molecular_function] (1)                                                          | Peptidase A2A, retrovirus, catalytic [IPR001995] (1); Zinc finger, CCHC-type [IPR001878] (1)                                                                                                                                                                                                                                                        | C_ush19_0182_mRNA_10.1 | -                        |
| GF0040304 | 0                      | 1                  | 0                     | 0    | Hypothetical protein (1)                                             | -                                                                                                                                                                                                                                                                                                                                                                                                                                                                                                                                          | -                                                                                                                                                                                                                                                                                                                                                   | C_ush19_0180_mRNA_8.1  | -                        |
| GF0040303 | 0                      | 1                  | 0                     | 0    | Hypothetical protein (1)                                             | -                                                                                                                                                                                                                                                                                                                                                                                                                                                                                                                                          | -                                                                                                                                                                                                                                                                                                                                                   | C_ush19_0180_mRNA_6.1  | -                        |
| GF0040302 | 0                      | 1                  | 0                     | 0    | Monosaccharide transport protein (1)                                 | -                                                                                                                                                                                                                                                                                                                                                                                                                                                                                                                                          | -                                                                                                                                                                                                                                                                                                                                                   | C_ush19_0180_mRNA_4.1  | -                        |
| GF0040301 | 0                      | 1                  | 0                     | 0    | Hypothetical protein (1)                                             | polysaccharide binding [GO:00030247 molecular_function] (1)                                                                                                                                                                                                                                                                                                                                                                                                                                                                                | Wall-associated receptor kinase, galacturonan-binding domain [IPR025287] (1)                                                                                                                                                                                                                                                                        | C_ush19_0180_mRNA_1.1  | -                        |
| GF0040300 | 0                      | 1                  | 0                     | 0    | Hypothetical protein (1)                                             | -                                                                                                                                                                                                                                                                                                                                                                                                                                                                                                                                          | -                                                                                                                                                                                                                                                                                                                                                   | C_ush19_0179_mRNA_8.1  | -                        |
| GF0040299 | 0                      | 1                  | 0                     | 0    | Hypothetical protein (1)                                             | -                                                                                                                                                                                                                                                                                                                                                                                                                                                                                                                                          | -                                                                                                                                                                                                                                                                                                                                                   | C_ush19_0179_mRNA_5.1  | -                        |
| GF0040298 | 0                      | 1                  | 0                     | 0    | Hypothetical protein (1)                                             | -                                                                                                                                                                                                                                                                                                                                                                                                                                                                                                                                          | -                                                                                                                                                                                                                                                                                                                                                   | C_ush19_0179_mRNA_2.1  | -                        |
| GF0040297 | 0                      | 1                  | 0                     | 0    | Hypothetical protein (1)                                             | -                                                                                                                                                                                                                                                                                                                                                                                                                                                                                                                                          | -                                                                                                                                                                                                                                                                                                                                                   | C_ush19_0178_mRNA_7.1  | -                        |
| GF0040296 | 0                      | 1                  | 0                     | 0    | Disease resistance family protein / LRR family protein, putative (1) | protein binding [GO:0005515 molecular_function] (1)                                                                                                                                                                                                                                                                                                                                                                                                                                                                                        | Leucine-rich repeat domain, I domain-like [IPR020375] (1); Leucine-rich repeat [IPR001611] (1)                                                                                                                                                                                                                                                      | C_ush19_0178_mRNA_5.1  | -                        |
| GF0040295 | 0                      | 1                  | 0                     | 0    | Hypothetical protein (1)                                             | -                                                                                                                                                                                                                                                                                                                                                                                                                                                                                                                                          | -                                                                                                                                                                                                                                                                                                                                                   | C_ush19_0178_mRNA_2.1  | -                        |
| GF0040294 | 0                      | 1                  | 0                     | 0    | Hypothetical protein (1)                                             | -                                                                                                                                                                                                                                                                                                                                                                                                                                                                                                                                          | -                                                                                                                                                                                                                                                                                                                                                   | C_ush19_0178_mRNA_1.1  | -                        |
| GF0040293 | 0                      | 1                  | 0                     | 0    | Hypothetical protein (1)                                             | -                                                                                                                                                                                                                                                                                                                                                                                                                                                                                                                                          | -                                                                                                                                                                                                                                                                                                                                                   | C_ush19_0177_mRNA_9.1  | -                        |
| GF0040292 | 0                      | 1                  | 0                     | 0    | Hypothetical protein (1)                                             | -                                                                                                                                                                                                                                                                                                                                                                                                                                                                                                                                          | -                                                                                                                                                                                                                                                                                                                                                   | C_ush19_0177_mRNA_4.1  | -                        |
| GF0040291 | 0                      | 1                  | 0                     | 0    | Hypothetical protein (1)                                             | -                                                                                                                                                                                                                                                                                                                                                                                                                                                                                                                                          | -                                                                                                                                                                                                                                                                                                                                                   | C_ush19_0177_mRNA_3.1  | -                        |
| GF0040290 | 0                      | 1                  | 0                     | 0    | Cyclic nucleotide-gated ion channel 1 (1)                            | -                                                                                                                                                                                                                                                                                                                                                                                                                                                                                                                                          | -                                                                                                                                                                                                                                                                                                                                                   | C_ush19_0177_mRNA_2.1  | -                        |
| GF0040289 | 0                      | 1                  | 0                     | 0    | Hypothetical protein (1)                                             | protein binding [GO:0005515 molecular_function] (1)                                                                                                                                                                                                                                                                                                                                                                                                                                                                                        | WD40 repeat [IPR001680] (1); WD40 repeat-containing domain [IPR017996] (1); WD40/VFTN repeat-like-containing domain [IPR015943] (1)                                                                                                                                                                                                                 | C_ush19_0175_mRNA_2.1  | -                        |
| GF0040288 | 0                      | 1                  | 0                     | 0    | Hypothetical protein (1)                                             | G-protein-coupled receptor signaling pathway [GO:0007186 biological_process] (1); G-protein beta-gamma-subunit complex binding [GO:0031683 molecular_function] (1); GTPase activity [GO:0003924 molecular_function] (1); pump/nucleotide binding [GO:0019001 molecular_function] (1); signal transducer activity [GO:0004871 molecular_function] (1)                                                                                                                                                                                       | Guanine nucleotide binding protein (G-protein), alpha subunit [IPR001019] (1); Zinc finger, FYVE/PHD-type [IPR011011] (1)                                                                                                                                                                                                                           | C_ush19_0175_mRNA_1.1  | -                        |
| GF0040287 | 0                      | 1                  | 0                     | 0    | Ras-related protein RABD1 (1)                                        | intracellular [GO:0009622 cellular_component] (1); GTP binding [GO:0005525 molecular_function] (1); intracellular protein transport [GO:0006886 biological_process] (1); signal transduction [GO:0007165 biological_process] (1); membrane [GO:0016020 cellular_component] (1); small GTPase mediated signal transduction [GO:0007264 biological_process] (1); nucleocytoplasmic transport [GO:0006913 biological_process] (1); protein transport [GO:0015031 biological_process] (1); GTPase activity [GO:0003924 molecular_function] (1) | Small GTPase superfamily, Ras type [IPR02849] (1); Ras GTPase [IPR02041] (1); Small GTPase superfamily, Rab type [IPR00579] (1); Small GTP-binding protein domain [IPR005225] (1); Small GTPase superfamily, Rho type [IPR00578] (1); Small GTPase superfamily [IPR001806] (1); P-loop containing nucleoside triphosphate hydrolase [IPR027417] (1) | C_ush19_0174_mRNA_8.1  | -                        |
| GF0040286 | 0                      | 1                  | 0                     | 0    | Hypothetical protein (1)                                             | -                                                                                                                                                                                                                                                                                                                                                                                                                                                                                                                                          | -                                                                                                                                                                                                                                                                                                                                                   | C_ush19_0174_mRNA_5.1  | -                        |
| GF0040285 | 0                      | 1                  | 0                     | 0    | Hypothetical protein (1)                                             | -                                                                                                                                                                                                                                                                                                                                                                                                                                                                                                                                          | -                                                                                                                                                                                                                                                                                                                                                   | C_ush19_0174_mRNA_2.1  | -                        |
| GF0040284 | 0                      | 1                  | 0                     | 0    | Hypothetical protein (1)                                             | -                                                                                                                                                                                                                                                                                                                                                                                                                                                                                                                                          | -                                                                                                                                                                                                                                                                                                                                                   | C_ush19_0174_mRNA_1.1  | -                        |
| GF0040283 | 0                      | 1                  | 0                     | 0    | Putative alcohol dehydrogenase (1)                                   | oxidoreductase activity [GO:0016491 molecular_function] (1); oxidation-reduction process [GO:0055114 biological_process] (1); zinc ion binding [GO:0008270 molecular_function] (1)                                                                                                                                                                                                                                                                                                                                                         | NAD(P)-binding domain [IPR016040] (1); Oxidase-like [IPR011032] (1); Alcohol dehydrogenase, C-terminal [IPR013149] (1); Alcohol dehydrogenase superfamily, zinc-type [IPR020285] (1)                                                                                                                                                                | C_ush19_0173_mRNA_6.1  | -                        |
| GF0040282 | 0                      | 1                  | 0                     | 0    | Hypothetical protein (1)                                             | oxidation-reduction process [GO:0055114 biological_process] (1); oxidoreductase activity [GO:0016491 molecular_function] (1); zinc ion binding [GO:0008270 molecular_function] (1)                                                                                                                                                                                                                                                                                                                                                         | NAD(P)-binding domain [IPR016040] (1); Alcohol dehydrogenase superfamily, zinc-type [IPR020285] (1)                                                                                                                                                                                                                                                 | C_ush19_0173_mRNA_4.1  | -                        |

| ID        | Num. in C. crottenstei | Num. in C. auris | Num. in P. putida | Note                                      | GO                                                                                                                                                                                                                                                                                                            | InterPro                                                                                                                                                                                                                                                                                | Members in C. crottenstei | Members in C. auris     | Members in P. putida |
|-----------|------------------------|------------------|-------------------|-------------------------------------------|---------------------------------------------------------------------------------------------------------------------------------------------------------------------------------------------------------------------------------------------------------------------------------------------------------------|-----------------------------------------------------------------------------------------------------------------------------------------------------------------------------------------------------------------------------------------------------------------------------------------|---------------------------|-------------------------|----------------------|
| GF0040281 | 0                      | 1                | 0                 | Hypothetical protein (1)                  | protein kinase activity [GO:0004672 molecular_function] (1); protein phosphorylation [GO:0006468 biological_process] (1); ATP binding [GO:000524 molecular_function] (1)                                                                                                                                      | Protein kinase domain [IPR00719] (1); Protein kinase-like domain [IPR011099] (1); Protein kinase, ATP binding site [IPR017411] (1)                                                                                                                                                      | -                         | C_ushii_01172_mRNA_1.1  | -                    |
| GF0040280 | 0                      | 1                | 0                 | C2H2 type zinc finger protein (1)         | nucleic acid binding [GO:0003676 molecular_function] (1); metal ion binding [GO:004672 molecular_function] (1)                                                                                                                                                                                                | Zinc finger, C2H2-like [IPR015880] (1); Zinc finger C2H2-type integrase DNA-binding domain [IPR013083] (1); Zinc finger, C2H2 [IPR007087] (1); NVN domain, linkin-b1-type [IPR021139] (1)                                                                                               | -                         | C_ushii_01172_mRNA_5.1  | -                    |
| GF0040279 | 0                      | 1                | 0                 | Hypothetical protein (1)                  | -                                                                                                                                                                                                                                                                                                             | -                                                                                                                                                                                                                                                                                       | -                         | C_ushii_01172_mRNA_4.1  | -                    |
| GF0040278 | 0                      | 1                | 0                 | Disease resistance RPS2-like protein (1)  | -                                                                                                                                                                                                                                                                                                             | Leucine-rich repeat domain, L domain-like [IPR02575] (1)                                                                                                                                                                                                                                | -                         | C_ushii_01172_mRNA_3.1  | -                    |
| GF0040277 | 0                      | 1                | 0                 | Hypothetical protein (1)                  | ribosome [GO:0005840 cellular_component] (1); structural constituent of ribosome [GO:0003735 molecular_function] (1); translation [GO:0006412 biological_process] (1)                                                                                                                                         | Ribosomal protein L14 domain [IPR023571] (1); Ribosomal protein L14bL23c [IPR000218] (1)                                                                                                                                                                                                | -                         | C_ushii_01172_mRNA_2.1  | -                    |
| GF0040276 | 0                      | 1                | 0                 | Hypothetical protein (1)                  | -                                                                                                                                                                                                                                                                                                             | -                                                                                                                                                                                                                                                                                       | -                         | C_ushii_01172_mRNA_11.1 | -                    |
| GF0040275 | 0                      | 1                | 0                 | C2H2 type zinc finger protein (1)         | -                                                                                                                                                                                                                                                                                                             | -                                                                                                                                                                                                                                                                                       | -                         | C_ushii_01172_mRNA_10.1 | -                    |
| GF0040274 | 0                      | 1                | 0                 | Hypothetical protein (1)                  | pectinesterase activity [GO:0003599 molecular_function] (1); cell wall modification [GO:0004254 biological_process] (1); cell wall [GO:0005618 cellular_component] (1)                                                                                                                                        | Pectinesterase, catalytic [IPR000070] (1); Pectin lyase fold [IPR012354] (1); HotDog domain [IPR029099] (1); Gag-polypeptide of LTR copia-type [IPR029472] (1); Pectin lyase fold/valence factor [IPR011059] (1)                                                                        | -                         | C_ushii_01171_mRNA_6.1  | -                    |
| GF0040273 | 0                      | 1                | 0                 | Hypothetical protein (1)                  | -                                                                                                                                                                                                                                                                                                             | -                                                                                                                                                                                                                                                                                       | -                         | C_ushii_01171_mRNA_3.1  | -                    |
| GF0040272 | 0                      | 1                | 0                 | Hypothetical protein (1)                  | -                                                                                                                                                                                                                                                                                                             | -                                                                                                                                                                                                                                                                                       | -                         | C_ushii_01171_mRNA_2.1  | -                    |
| GF0040271 | 0                      | 1                | 0                 | Hypothetical protein (1)                  | regulation of transcription, DNA-templated [GO:0006355 biological_process] (1)                                                                                                                                                                                                                                | FHV3/AR1 family [IPR01052] (1)                                                                                                                                                                                                                                                          | -                         | C_ushii_01171_mRNA_1.1  | -                    |
| GF0040270 | 0                      | 1                | 0                 | Cytochrome P450 93A3 (1)                  | heme binding [GO:0002037 molecular_function] (1); iron ion binding [GO:0005506 molecular_function] (1); oxidoreduction process [GO:0005114 biological_process] (1); oxidoreductase activity, acting on paired donors, with incorporation or reduction of molecular oxygen [GO:0016705 molecular_function] (1) | Cytochrome P450 [IPR01128] (1); Cytochrome P450, E-class, group I [IPR020401] (1); Cytochrome P450, conserved site [IPR017922] (1)                                                                                                                                                      | -                         | C_ushii_01170_mRNA_5.1  | -                    |
| GF0040269 | 0                      | 1                | 0                 | Hypothetical protein (1)                  | -                                                                                                                                                                                                                                                                                                             | Endonuclease/exonuclease/phosphatase [IPR005153] (1); Leucine-rich repeat 3 [IPR01715] (1)                                                                                                                                                                                              | -                         | C_ushii_01170_mRNA_4.1  | -                    |
| GF0040268 | 0                      | 1                | 0                 | Hypothetical protein (1)                  | -                                                                                                                                                                                                                                                                                                             | -                                                                                                                                                                                                                                                                                       | -                         | C_ushii_01169_mRNA_7.1  | -                    |
| GF0040267 | 0                      | 1                | 0                 | Hypothetical protein (1)                  | protein binding [GO:0005515 molecular_function] (1)                                                                                                                                                                                                                                                           | Thioredoxin-like fold [IPR012336] (1); Glutathione S-transferase, N-terminal [IPR004945] (1)                                                                                                                                                                                            | -                         | C_ushii_01169_mRNA_5.1  | -                    |
| GF0040266 | 0                      | 1                | 0                 | Hypothetical protein (1)                  | -                                                                                                                                                                                                                                                                                                             | -                                                                                                                                                                                                                                                                                       | -                         | C_ushii_01169_mRNA_1.1  | -                    |
| GF0040265 | 0                      | 1                | 0                 | Hypothetical protein (1)                  | -                                                                                                                                                                                                                                                                                                             | -                                                                                                                                                                                                                                                                                       | -                         | C_ushii_01168_mRNA_9.1  | -                    |
| GF0040264 | 0                      | 1                | 0                 | Hypothetical protein (1)                  | -                                                                                                                                                                                                                                                                                                             | -                                                                                                                                                                                                                                                                                       | -                         | C_ushii_01168_mRNA_8.1  | -                    |
| GF0040263 | 0                      | 1                | 0                 | Hypothetical protein (1)                  | -                                                                                                                                                                                                                                                                                                             | -                                                                                                                                                                                                                                                                                       | -                         | C_ushii_01168_mRNA_7.1  | -                    |
| GF0040262 | 0                      | 1                | 0                 | Hypothetical protein (1)                  | -                                                                                                                                                                                                                                                                                                             | -                                                                                                                                                                                                                                                                                       | -                         | C_ushii_01168_mRNA_6.1  | -                    |
| GF0040261 | 0                      | 1                | 0                 | Hypothetical protein (1)                  | -                                                                                                                                                                                                                                                                                                             | -                                                                                                                                                                                                                                                                                       | -                         | C_ushii_01168_mRNA_5.1  | -                    |
| GF0040260 | 0                      | 1                | 0                 | Hypothetical protein (1)                  | -                                                                                                                                                                                                                                                                                                             | -                                                                                                                                                                                                                                                                                       | -                         | C_ushii_01168_mRNA_3.1  | -                    |
| GF0040259 | 0                      | 1                | 0                 | Hypothetical protein (1)                  | -                                                                                                                                                                                                                                                                                                             | -                                                                                                                                                                                                                                                                                       | -                         | C_ushii_01168_mRNA_2.1  | -                    |
| GF0040258 | 0                      | 1                | 0                 | Probable pectinesterase 56 (1)            | pectinesterase activity [GO:0003599 molecular_function] (1); cell wall [GO:0005618 cellular_component] (1); cell wall modification [GO:0004254 biological_process] (1)                                                                                                                                        | Pectinesterase, Arg active site [IPR033131] (1); Pectinesterase, catalytic [IPR000070] (1); Pectin lyase fold [IPR012354] (1); Pectin lyase fold/valence factor [IPR011059] (1)                                                                                                         | -                         | C_ushii_01168_mRNA_14.1 | -                    |
| GF0040257 | 0                      | 1                | 0                 | Hypothetical protein (1)                  | -                                                                                                                                                                                                                                                                                                             | -                                                                                                                                                                                                                                                                                       | -                         | C_ushii_01168_mRNA_13.1 | -                    |
| GF0040256 | 0                      | 1                | 0                 | Hypothetical protein (1)                  | protein phosphorylation [GO:0006468 biological_process] (1); protein kinase activity [GO:0004672 molecular_function] (1); ATP binding [GO:000524 molecular_function] (1)                                                                                                                                      | Serine/threonine-protein kinase, active site [IPR007171] (1); Retroransposon gag domain [IPR005162] (1); Serine/threonine-specific protein kinase, catalytic domain [IPR002290] (1); Protein kinase domain [IPR000719] (1); Protein kinase-like domain [IPR011099] (1)                  | -                         | C_ushii_01168_mRNA_10.1 | -                    |
| GF0040255 | 0                      | 1                | 0                 | Hypothetical protein (1)                  | nucleic acid binding [GO:0003676 molecular_function] (1); zinc ion binding [GO:0005270 molecular_function] (1)                                                                                                                                                                                                | Zinc finger, CCHC-type [IPR018178] (1)                                                                                                                                                                                                                                                  | -                         | C_ushii_01168_mRNA_1.1  | -                    |
| GF0040254 | 0                      | 1                | 0                 | Hypothetical protein (1)                  | -                                                                                                                                                                                                                                                                                                             | -                                                                                                                                                                                                                                                                                       | -                         | C_ushii_01167_mRNA_8.1  | -                    |
| GF0040253 | 0                      | 1                | 0                 | Hypothetical protein (1)                  | -                                                                                                                                                                                                                                                                                                             | -                                                                                                                                                                                                                                                                                       | -                         | C_ushii_01167_mRNA_2.1  | -                    |
| GF0040252 | 0                      | 1                | 0                 | Hypothetical protein (1)                  | -                                                                                                                                                                                                                                                                                                             | -                                                                                                                                                                                                                                                                                       | -                         | C_ushii_01167_mRNA_12.1 | -                    |
| GF0040251 | 0                      | 1                | 0                 | Hypothetical protein (1)                  | -                                                                                                                                                                                                                                                                                                             | PUA-like domain [IPR015947] (1)                                                                                                                                                                                                                                                         | -                         | C_ushii_01167_mRNA_1.1  | -                    |
| GF0040250 | 0                      | 1                | 0                 | Hypothetical protein (1)                  | -                                                                                                                                                                                                                                                                                                             | Transposon, En-Spm-like [IPR004242] (1)                                                                                                                                                                                                                                                 | -                         | C_ushii_01166_mRNA_6.1  | -                    |
| GF0040249 | 0                      | 1                | 0                 | Putative mtdR family transposase-like (1) | zinc ion binding [GO:0008270 molecular_function] (1)                                                                                                                                                                                                                                                          | Transposase, MDR, plant [IPR004332] (1); MLE transposase domain [IPR012399] (1); Zinc finger, PBMZ-type [IPR005644] (1); Zinc finger, SWIM-type [IPR007527] (1)                                                                                                                         | -                         | C_ushii_01166_mRNA_2.1  | -                    |
| GF0040248 | 0                      | 1                | 0                 | Hypothetical protein (1)                  | -                                                                                                                                                                                                                                                                                                             | -                                                                                                                                                                                                                                                                                       | -                         | C_ushii_01166_mRNA_1.1  | -                    |
| GF0040247 | 0                      | 1                | 0                 | Hypothetical protein (1)                  | -                                                                                                                                                                                                                                                                                                             | -                                                                                                                                                                                                                                                                                       | -                         | C_ushii_01165_mRNA_3.1  | -                    |
| GF0040246 | 0                      | 1                | 0                 | Hypothetical protein (1)                  | nucleic acid binding [GO:0003676 molecular_function] (1); nucleotide binding [GO:0000166 molecular_function] (1); regulation of transcription, DNA-templated [GO:0006355 biological_process] (1); transcription factor activity, sequence-specific, DNA binding [GO:0003700 molecular_function] (1)           | Nucleotide-binding alpha-beta plait domain [IPR026777] (1); Transcription factor, K-box [IPR002487] (1)                                                                                                                                                                                 | -                         | C_ushii_01164_mRNA_9.1  | -                    |
| GF0040245 | 0                      | 1                | 0                 | Hypothetical protein (1)                  | -                                                                                                                                                                                                                                                                                                             | Retroransposon gag domain [IPR005162] (1)                                                                                                                                                                                                                                               | -                         | C_ushii_01164_mRNA_7.1  | -                    |
| GF0040244 | 0                      | 1                | 0                 | Hypothetical protein (1)                  | -                                                                                                                                                                                                                                                                                                             | -                                                                                                                                                                                                                                                                                       | -                         | C_ushii_01164_mRNA_6.1  | -                    |
| GF0040243 | 0                      | 1                | 0                 | Hypothetical protein (1)                  | -                                                                                                                                                                                                                                                                                                             | -                                                                                                                                                                                                                                                                                       | -                         | C_ushii_01164_mRNA_5.1  | -                    |
| GF0040242 | 0                      | 1                | 0                 | Hypothetical protein (1)                  | -                                                                                                                                                                                                                                                                                                             | -                                                                                                                                                                                                                                                                                       | -                         | C_ushii_01164_mRNA_15.1 | -                    |
| GF0040241 | 0                      | 1                | 0                 | Hypothetical protein (1)                  | -                                                                                                                                                                                                                                                                                                             | -                                                                                                                                                                                                                                                                                       | -                         | C_ushii_01164_mRNA_14.1 | -                    |
| GF0040240 | 0                      | 1                | 0                 | Protein AIG1 (1)                          | GTP binding [GO:0005525 molecular_function] (1)                                                                                                                                                                                                                                                               | P-loop containing nucleoside triphosphate hydrolase [IPR027471] (1); AGC1-type guanine nucleotide-binding (G) domain [IPR006703] (1)                                                                                                                                                    | -                         | C_ushii_01164_mRNA_13.1 | -                    |
| GF0040239 | 0                      | 1                | 0                 | AGC1 domain-containing protein (1)        | GTP binding [GO:0005525 molecular_function] (1)                                                                                                                                                                                                                                                               | AGC1-type guanine nucleotide-binding (G) domain [IPR006703] (1); P-loop containing nucleoside triphosphate hydrolase [IPR027471] (1)                                                                                                                                                    | -                         | C_ushii_01164_mRNA_11.1 | -                    |
| GF0040238 | 0                      | 1                | 0                 | Hypothetical protein (1)                  | -                                                                                                                                                                                                                                                                                                             | Leucine-rich repeat domain, L domain-like [IPR02575] (1)                                                                                                                                                                                                                                | -                         | C_ushii_01163_mRNA_9.1  | -                    |
| GF0040237 | 0                      | 1                | 0                 | Hypothetical protein (1)                  | nucleic acid binding [GO:0003676 molecular_function] (1)                                                                                                                                                                                                                                                      | Ribonuclease H-like domain [IPR012337] (1)                                                                                                                                                                                                                                              | -                         | C_ushii_01163_mRNA_6.1  | -                    |
| GF0040236 | 0                      | 1                | 0                 | Hypothetical protein (1)                  | NADP binding [GO:0005661 molecular_function] (1); glucose-6-phosphate dehydrogenase activity [GO:0004345 molecular_function] (1); oxidoreduction process [GO:0005114 biological_process] (1); glucose metabolic process [GO:0006006 biological_process] (1)                                                   | Glucose-6-phosphate dehydrogenase, NAD-binding [IPR025751] (1); Glucose-6-phosphate dehydrogenase [IPR001282] (1); NAD(P)-binding domain [IPR010400] (1); Glucose-6-phosphate dehydrogenase, C-terminal [IPR028751] (1)                                                                 | -                         | C_ushii_01163_mRNA_4.1  | -                    |
| GF0040235 | 0                      | 1                | 0                 | Receptor like protein 33 (1)              | protein binding [GO:0005515 molecular_function] (1)                                                                                                                                                                                                                                                           | Leucine-rich repeat domain, L domain-like [IPR02575] (1); Leucine-rich repeat, typical subtype [IPR03591] (1); Leucine-rich repeat [IPR01611] (1)                                                                                                                                       | -                         | C_ushii_01163_mRNA_3.1  | -                    |
| GF0040234 | 0                      | 1                | 0                 | Hypothetical protein (1)                  | glucose metabolic process [GO:0006006 biological_process] (1); oxidoreduction process [GO:0005114 biological_process] (1); glucose-6-phosphate dehydrogenase activity [GO:0004345 molecular_function] (1); NADP binding [GO:0005661 molecular_function] (1)                                                   | Glucose-6-phosphate dehydrogenase, active site [IPR019796] (1); Glucose-6-phosphate dehydrogenase, NAD-binding [IPR025741] (1); Glucose-6-phosphate dehydrogenase [IPR001282] (1); Glucose-6-phosphate dehydrogenase, C-terminal [IPR028751] (1); NAD(P)-binding domain [IPR010400] (1) | -                         | C_ushii_01163_mRNA_2.1  | -                    |
| GF0040233 | 0                      | 1                | 0                 | Leucine-rich repeat, plant specific (1)   | protein binding [GO:0005515 molecular_function] (1)                                                                                                                                                                                                                                                           | Leucine-rich repeat-containing N-terminal, plant-type [IPR013210] (1); Leucine-rich repeat, typical subtype [IPR03591] (1); Leucine-rich repeat domain, L domain-like [IPR02575] (1)                                                                                                    | -                         | C_ushii_01163_mRNA_10.1 | -                    |
| GF0040232 | 0                      | 1                | 0                 | Hypothetical protein (1)                  | -                                                                                                                                                                                                                                                                                                             | Leucine-rich repeat-containing N-terminal, plant-type [IPR013210] (1)                                                                                                                                                                                                                   | -                         | C_ushii_01163_mRNA_1.1  | -                    |
| GF0040231 | 0                      | 1                | 0                 | 40S ribosomal protein S2-2 (1)            | translation [GO:0006412 biological_process] (1); structural constituent of ribosome [GO:0003735 molecular_function] (1); ribosome [GO:0005840 cellular_component] (1)                                                                                                                                         | Ribosomal protein S5 [IPR000851] (1); Ribosomal protein S5 domain 2-type 04R [IPR020568] (1); Ribosomal protein S5, C-terminal [IPR005241] (1); Ribosomal protein S5 domain 2-type fold, subgroup [IPR014721] (1)                                                                       | -                         | C_ushii_01162_mRNA_9.1  | -                    |
| GF0040230 | 0                      | 1                | 0                 | Hypothetical protein (1)                  | -                                                                                                                                                                                                                                                                                                             | Papillipase, S8, subtilisin-related [IPR015500] (1)                                                                                                                                                                                                                                     | -                         | C_ushii_01162_mRNA_5.1  | -                    |
| GF0040229 | 0                      | 1                | 0                 | Hypothetical protein (1)                  | -                                                                                                                                                                                                                                                                                                             | -                                                                                                                                                                                                                                                                                       | -                         | C_ushii_01162_mRNA_3.1  | -                    |
| GF0040228 | 0                      | 1                | 0                 | Hypothetical protein (1)                  | -                                                                                                                                                                                                                                                                                                             | -                                                                                                                                                                                                                                                                                       | -                         | C_ushii_01162_mRNA_14.1 | -                    |
| GF0040227 | 0                      | 1                | 0                 | Hypothetical protein (1)                  | -                                                                                                                                                                                                                                                                                                             | -                                                                                                                                                                                                                                                                                       | -                         | C_ushii_01162_mRNA_13.1 | -                    |
| GF0040226 | 0                      | 1                | 0                 | Hypothetical protein (1)                  | -                                                                                                                                                                                                                                                                                                             | -                                                                                                                                                                                                                                                                                       | -                         | C_ushii_01162_mRNA_12.1 | -                    |
| GF0040225 | 0                      | 1                | 0                 | Hypothetical protein (1)                  | -                                                                                                                                                                                                                                                                                                             | -                                                                                                                                                                                                                                                                                       | -                         | C_ushii_01162_mRNA_10.1 | -                    |
| GF0040224 | 0                      | 1                | 0                 | mature R (1)                              | mRNA processing [GO:0006397 biological_process] (1)                                                                                                                                                                                                                                                           | Domain X [IPR024937] (1)                                                                                                                                                                                                                                                                | -                         | C_ushii_01161_mRNA_4.1  | -                    |
| GF0040223 | 0                      | 1                | 0                 | Hypothetical protein (1)                  | -                                                                                                                                                                                                                                                                                                             | -                                                                                                                                                                                                                                                                                       | -                         | C_ushii_01161_mRNA_3.1  | -                    |
| GF0040222 | 0                      | 1                | 0                 | Hypothetical protein (1)                  | -                                                                                                                                                                                                                                                                                                             | -                                                                                                                                                                                                                                                                                       | -                         | C_ushii_01161_mRNA_1.1  | -                    |
| GF0040221 | 0                      | 1                | 0                 | Hypothetical protein (1)                  | -                                                                                                                                                                                                                                                                                                             | -                                                                                                                                                                                                                                                                                       | -                         | C_ushii_01160_mRNA_14.1 | -                    |
| GF0040220 | 0                      | 1                | 0                 | SCO1 protein (1)                          | -                                                                                                                                                                                                                                                                                                             | Thioredoxin-like fold [IPR012336] (1); Copper-chaperone SCO1/ScfC [IPR003782] (1)                                                                                                                                                                                                       | -                         | C_ushii_01159_mRNA_9.1  | -                    |
| GF0040219 | 0                      | 1                | 0                 | Hypothetical protein (1)                  | zinc ion binding [GO:0008270 molecular_function] (1)                                                                                                                                                                                                                                                          | Zinc finger, GRF-type [IPR010666] (1)                                                                                                                                                                                                                                                   | -                         | C_ushii_01159_mRNA_4.1  | -                    |
| GF0040218 | 0                      | 1                | 0                 | Hypothetical protein (1)                  | -                                                                                                                                                                                                                                                                                                             | Reverse transcriptase domain [IPR00477] (1); Reverse transcriptase zinc-binding domain [IPR029669] (1)                                                                                                                                                                                  | -                         | C_ushii_01159_mRNA_3.1  | -                    |

| ID        | Num. in C. crottenstei | Num. in C. auris | Num. in P. putida | Note                                                                        | GO                                                                                                                                                                                                                                                                                                                                                                                                                                | InterPro                                                                                                                                                                                                                                                                                                                                                                                                                                                                                                      | Members in C. crottenstei | Members in C. auris     | Members in P. putida |
|-----------|------------------------|------------------|-------------------|-----------------------------------------------------------------------------|-----------------------------------------------------------------------------------------------------------------------------------------------------------------------------------------------------------------------------------------------------------------------------------------------------------------------------------------------------------------------------------------------------------------------------------|---------------------------------------------------------------------------------------------------------------------------------------------------------------------------------------------------------------------------------------------------------------------------------------------------------------------------------------------------------------------------------------------------------------------------------------------------------------------------------------------------------------|---------------------------|-------------------------|----------------------|
| GF0040217 | 0                      | 1                | 0                 | Hypothetical protein (1)                                                    | transmembrane transport [GO:005085 biological_process] (1); integral component of membrane [GO:0016021 cellular_component] (1)                                                                                                                                                                                                                                                                                                    | Major facilitator superfamily [IPR011701] (1); Major facilitator superfamily domain [IPR020461] (1)                                                                                                                                                                                                                                                                                                                                                                                                           | -                         | C_umbii_01159_mRNA_15,1 | -                    |
| GF0040216 | 0                      | 1                | 0                 | Monosaccharide transport protein (1)                                        | -                                                                                                                                                                                                                                                                                                                                                                                                                                 | -                                                                                                                                                                                                                                                                                                                                                                                                                                                                                                             | -                         | C_umbii_01159_mRNA_14,1 | -                    |
| GF0040215 | 0                      | 1                | 0                 | Hypothetical protein (1)                                                    | -                                                                                                                                                                                                                                                                                                                                                                                                                                 | -                                                                                                                                                                                                                                                                                                                                                                                                                                                                                                             | -                         | C_umbii_01159_mRNA_13,1 | -                    |
| GF0040214 | 0                      | 1                | 0                 | Succinate dehydrogenase [ubiquinone] iron-sulfur subunit, mitochondrial (1) | oxidation-reduction process [GO:005511 biological_process] (1); oxidoreductase activity [GO:001699] (1); 2 iron, 2 sulfur cluster binding [GO:001537 molecular_function] (1); electron carrier activity [GO:0009055 molecular_function] (1); tricarboxylic acid cycle [GO:0006099 biological_process] (1); non-sulfur cluster binding [GO:001536 molecular_function] (1)                                                          | 4Fe-4S ferredoxin-type, iron-sulfur binding domain [IPR017896] (1); Succinate dehydrogenase fumarate reductase N-terminal [IPR025192] (1); 2Fe-2S ferredoxin, iron-sulfur binding site [IPR006958] (1); Beta-grasp domain [IPR012675] (1); 4Fe-4S ferredoxin, non-sulfur-binding, conserved site [IPR017900] (1); 2Fe-2S ferredoxin-type iron-sulfur binding domain [IPR010041] (1); Alpha-helical ferredoxin [IPR009001] (1); Succinate dehydrogenase/fumarate reductase iron-sulfur protein [IPR004491] (1) | -                         | C_umbii_01159_mRNA_10,1 | -                    |
| GF0040213 | 0                      | 1                | 0                 | Hypothetical protein (1)                                                    | -                                                                                                                                                                                                                                                                                                                                                                                                                                 | -                                                                                                                                                                                                                                                                                                                                                                                                                                                                                                             | -                         | C_umbii_01159_mRNA_1,1  | -                    |
| GF0040212 | 0                      | 1                | 0                 | Hypothetical protein (1)                                                    | -                                                                                                                                                                                                                                                                                                                                                                                                                                 | -                                                                                                                                                                                                                                                                                                                                                                                                                                                                                                             | -                         | C_umbii_01158_mRNA_9,1  | -                    |
| GF0040211 | 0                      | 1                | 0                 | Hypothetical protein (1)                                                    | -                                                                                                                                                                                                                                                                                                                                                                                                                                 | -                                                                                                                                                                                                                                                                                                                                                                                                                                                                                                             | -                         | C_umbii_01158_mRNA_8,1  | -                    |
| GF0040210 | 0                      | 1                | 0                 | Hypothetical protein (1)                                                    | RNA-DNA hybrid ribonuclease activity [GO:004253 molecular_function] (1); nucleic acid binding [GO:0003676 molecular_function] (1)                                                                                                                                                                                                                                                                                                 | Aspartic peptidase domain [IPR021199] (1); Ribonuclease H domain [IPR002156] (1); Ribonuclease H-like domain [IPR012337] (1)                                                                                                                                                                                                                                                                                                                                                                                  | -                         | C_umbii_01158_mRNA_7,1  | -                    |
| GF0040209 | 0                      | 1                | 0                 | Hypothetical protein (1)                                                    | -                                                                                                                                                                                                                                                                                                                                                                                                                                 | -                                                                                                                                                                                                                                                                                                                                                                                                                                                                                                             | -                         | C_umbii_01158_mRNA_6,1  | -                    |
| GF0040208 | 0                      | 1                | 0                 | Hypothetical protein (1)                                                    | -                                                                                                                                                                                                                                                                                                                                                                                                                                 | -                                                                                                                                                                                                                                                                                                                                                                                                                                                                                                             | -                         | C_umbii_01158_mRNA_5,1  | -                    |
| GF0040207 | 0                      | 1                | 0                 | Hypothetical protein (1)                                                    | -                                                                                                                                                                                                                                                                                                                                                                                                                                 | -                                                                                                                                                                                                                                                                                                                                                                                                                                                                                                             | -                         | C_umbii_01158_mRNA_14,1 | -                    |
| GF0040206 | 0                      | 1                | 0                 | Hypothetical protein (1)                                                    | -                                                                                                                                                                                                                                                                                                                                                                                                                                 | -                                                                                                                                                                                                                                                                                                                                                                                                                                                                                                             | -                         | C_umbii_01158_mRNA_12,1 | -                    |
| GF0040205 | 0                      | 1                | 0                 | Hypothetical protein (1)                                                    | -                                                                                                                                                                                                                                                                                                                                                                                                                                 | -                                                                                                                                                                                                                                                                                                                                                                                                                                                                                                             | -                         | C_umbii_01158_mRNA_10,1 | -                    |
| GF0040204 | 0                      | 1                | 0                 | Hypothetical protein (1)                                                    | DNA binding [GO:0003677 molecular_function] (1); protein dimerization activity [GO:0046983 molecular_function] (1)                                                                                                                                                                                                                                                                                                                | DnaJ domain [IPR01623] (1)                                                                                                                                                                                                                                                                                                                                                                                                                                                                                    | -                         | C_umbii_01156_mRNA_9,1  | -                    |
| GF0040203 | 0                      | 1                | 0                 | MADS-box transcription factor family protein (1)                            | protein dimerization activity [GO:0046983 molecular_function] (1); DNA binding [GO:0003677 molecular_function] (1)                                                                                                                                                                                                                                                                                                                | Transcription factor, MADS-box [IPR002100] (1)                                                                                                                                                                                                                                                                                                                                                                                                                                                                | -                         | C_umbii_01156_mRNA_8,1  | -                    |
| GF0040202 | 0                      | 1                | 0                 | Hypothetical protein (1)                                                    | -                                                                                                                                                                                                                                                                                                                                                                                                                                 | -                                                                                                                                                                                                                                                                                                                                                                                                                                                                                                             | -                         | C_umbii_01156_mRNA_7,1  | -                    |
| GF0040201 | 0                      | 1                | 0                 | Hypothetical protein (1)                                                    | -                                                                                                                                                                                                                                                                                                                                                                                                                                 | -                                                                                                                                                                                                                                                                                                                                                                                                                                                                                                             | -                         | C_umbii_01156_mRNA_6,1  | -                    |
| GF0040200 | 0                      | 1                | 0                 | Hypothetical protein (1)                                                    | -                                                                                                                                                                                                                                                                                                                                                                                                                                 | -                                                                                                                                                                                                                                                                                                                                                                                                                                                                                                             | -                         | C_umbii_01156_mRNA_5,1  | -                    |
| GF0040199 | 0                      | 1                | 0                 | Hypothetical protein (1)                                                    | calcium ion binding [GO:0005509 molecular_function] (1)                                                                                                                                                                                                                                                                                                                                                                           | EF-hand domain [IPR02048] (1)                                                                                                                                                                                                                                                                                                                                                                                                                                                                                 | -                         | C_umbii_01156_mRNA_2,1  | -                    |
| GF0040198 | 0                      | 1                | 0                 | Hypothetical protein (1)                                                    | nucleic acid binding [GO:0003676 molecular_function] (1); RNA-DNA hybrid ribonuclease activity [GO:0004523 molecular_function] (1)                                                                                                                                                                                                                                                                                                | Ribonuclease H-like domain [IPR012337] (1); Reverse transcriptase zinc-binding domain [IPR02060] (1); Ribonuclease H domain [IPR002156] (1)                                                                                                                                                                                                                                                                                                                                                                   | -                         | C_umbii_01156_mRNA_11,1 | -                    |
| GF0040197 | 0                      | 1                | 0                 | Hypothetical protein (1)                                                    | -                                                                                                                                                                                                                                                                                                                                                                                                                                 | -                                                                                                                                                                                                                                                                                                                                                                                                                                                                                                             | -                         | C_umbii_01156_mRNA_1,1  | -                    |
| GF0040196 | 0                      | 1                | 0                 | Hypothetical protein (1)                                                    | -                                                                                                                                                                                                                                                                                                                                                                                                                                 | -                                                                                                                                                                                                                                                                                                                                                                                                                                                                                                             | -                         | C_umbii_01155_mRNA_8,1  | -                    |
| GF0040195 | 0                      | 1                | 0                 | Hypothetical protein (1)                                                    | calmodulin binding [GO:0005516 molecular_function] (1); response to stress [GO:0006959 biological_process] (1)                                                                                                                                                                                                                                                                                                                    | Wall-associated receptor kinase, C-terminal [IPR012471] (1)                                                                                                                                                                                                                                                                                                                                                                                                                                                   | -                         | C_umbii_01155_mRNA_7,1  | -                    |
| GF0040194 | 0                      | 1                | 0                 | Hypothetical protein (1)                                                    | -                                                                                                                                                                                                                                                                                                                                                                                                                                 | -                                                                                                                                                                                                                                                                                                                                                                                                                                                                                                             | -                         | C_umbii_01155_mRNA_1,1  | -                    |
| GF0040193 | 0                      | 1                | 0                 | Hypothetical protein (1)                                                    | -                                                                                                                                                                                                                                                                                                                                                                                                                                 | -                                                                                                                                                                                                                                                                                                                                                                                                                                                                                                             | -                         | C_umbii_01154_mRNA_8,1  | -                    |
| GF0040192 | 0                      | 1                | 0                 | Hypothetical protein (1)                                                    | -                                                                                                                                                                                                                                                                                                                                                                                                                                 | -                                                                                                                                                                                                                                                                                                                                                                                                                                                                                                             | -                         | C_umbii_01154_mRNA_7,1  | -                    |
| GF0040191 | 0                      | 1                | 0                 | Hypothetical protein (1)                                                    | -                                                                                                                                                                                                                                                                                                                                                                                                                                 | -                                                                                                                                                                                                                                                                                                                                                                                                                                                                                                             | -                         | C_umbii_01154_mRNA_5,1  | -                    |
| GF0040190 | 0                      | 1                | 0                 | Hypothetical protein (1)                                                    | -                                                                                                                                                                                                                                                                                                                                                                                                                                 | -                                                                                                                                                                                                                                                                                                                                                                                                                                                                                                             | -                         | C_umbii_01154_mRNA_2,1  | -                    |
| GF0040189 | 0                      | 1                | 0                 | γ-Cytohlimin ribazole 5'-monophosphate ribosyltransferase (1)               | -                                                                                                                                                                                                                                                                                                                                                                                                                                 | LOG family [IPR031100] (1)                                                                                                                                                                                                                                                                                                                                                                                                                                                                                    | -                         | C_umbii_01154_mRNA_12,1 | -                    |
| GF0040188 | 0                      | 1                | 0                 | Hypothetical protein (1)                                                    | -                                                                                                                                                                                                                                                                                                                                                                                                                                 | -                                                                                                                                                                                                                                                                                                                                                                                                                                                                                                             | -                         | C_umbii_01153_mRNA_6,1  | -                    |
| GF0040187 | 0                      | 1                | 0                 | Hypothetical protein (1)                                                    | -                                                                                                                                                                                                                                                                                                                                                                                                                                 | -                                                                                                                                                                                                                                                                                                                                                                                                                                                                                                             | -                         | C_umbii_01153_mRNA_2,1  | -                    |
| GF0040186 | 0                      | 1                | 0                 | Hypothetical protein (1)                                                    | -                                                                                                                                                                                                                                                                                                                                                                                                                                 | -                                                                                                                                                                                                                                                                                                                                                                                                                                                                                                             | -                         | C_umbii_01153_mRNA_12,1 | -                    |
| GF0040185 | 0                      | 1                | 0                 | LRR receptor-like kinase family protein (1)                                 | protein binding [GO:0005515 molecular_function] (1)                                                                                                                                                                                                                                                                                                                                                                               | Protein kinase-like domain [IPR011009] (1); Leucine-rich repeat domain, L-domain-like [IPR02075] (1); Leucine-rich repeat [IPR01611] (1)                                                                                                                                                                                                                                                                                                                                                                      | -                         | C_umbii_01153_mRNA_10,1 | -                    |
| GF0040184 | 0                      | 1                | 0                 | Hypothetical protein (1)                                                    | -                                                                                                                                                                                                                                                                                                                                                                                                                                 | -                                                                                                                                                                                                                                                                                                                                                                                                                                                                                                             | -                         | C_umbii_01153_mRNA_1,1  | -                    |
| GF0040183 | 0                      | 1                | 0                 | Hypothetical protein (1)                                                    | protein folding [GO:0006457 biological_process] (1)                                                                                                                                                                                                                                                                                                                                                                               | FKBP-type peptidyl-prolyl cis-trans isomerase domain [IPR01179] (1); Peptidyl-prolyl cis-trans isomerase, FKBP-type [IPR023566] (1)                                                                                                                                                                                                                                                                                                                                                                           | -                         | C_umbii_01152_mRNA_8,1  | -                    |
| GF0040182 | 0                      | 1                | 0                 | Hypothetical protein (1)                                                    | protein binding [GO:0005515 molecular_function] (1)                                                                                                                                                                                                                                                                                                                                                                               | Bromodomain [IPR01487] (1); Ubiquitin domain [IPR00026] (1); Transcription initiation factor TFIID subunit 1, domain of unknown function [IPR02295] (1); Ubiquitin-related domain [IPR00701] (1)                                                                                                                                                                                                                                                                                                              | -                         | C_umbii_01152_mRNA_4,1  | -                    |
| GF0040181 | 0                      | 1                | 0                 | Hypothetical protein (1)                                                    | -                                                                                                                                                                                                                                                                                                                                                                                                                                 | TAF11-230 TBP-binding [IPR009067] (1)                                                                                                                                                                                                                                                                                                                                                                                                                                                                         | -                         | C_umbii_01152_mRNA_3,1  | -                    |
| GF0040180 | 0                      | 1                | 0                 | Hypothetical protein (1)                                                    | -                                                                                                                                                                                                                                                                                                                                                                                                                                 | -                                                                                                                                                                                                                                                                                                                                                                                                                                                                                                             | -                         | C_umbii_01152_mRNA_1,1  | -                    |
| GF0040179 | 0                      | 1                | 0                 | Hypothetical protein (1)                                                    | protein dimerization activity [GO:0046983 molecular_function] (1)                                                                                                                                                                                                                                                                                                                                                                 | HAT, C-terminal dimerization domain [IPR008906] (1)                                                                                                                                                                                                                                                                                                                                                                                                                                                           | -                         | C_umbii_01151_mRNA_8,1  | -                    |
| GF0040178 | 0                      | 1                | 0                 | Hypothetical protein (1)                                                    | -                                                                                                                                                                                                                                                                                                                                                                                                                                 | -                                                                                                                                                                                                                                                                                                                                                                                                                                                                                                             | -                         | C_umbii_01151_mRNA_4,1  | -                    |
| GF0040177 | 0                      | 1                | 0                 | Hypothetical protein (1)                                                    | -                                                                                                                                                                                                                                                                                                                                                                                                                                 | -                                                                                                                                                                                                                                                                                                                                                                                                                                                                                                             | -                         | C_umbii_01150_mRNA_9,1  | -                    |
| GF0040176 | 0                      | 1                | 0                 | Hypothetical protein (1)                                                    | -                                                                                                                                                                                                                                                                                                                                                                                                                                 | -                                                                                                                                                                                                                                                                                                                                                                                                                                                                                                             | -                         | C_umbii_01150_mRNA_7,1  | -                    |
| GF0040175 | 0                      | 1                | 0                 | Phosphoprotein phosphatase (1)                                              | -                                                                                                                                                                                                                                                                                                                                                                                                                                 | Leucine-rich repeat domain, L domain-like [IPR012675] (1)                                                                                                                                                                                                                                                                                                                                                                                                                                                     | -                         | C_umbii_01150_mRNA_3,1  | -                    |
| GF0040174 | 0                      | 1                | 0                 | Hypothetical protein (1)                                                    | ATP binding [GO:0005524 molecular_function] (1); protein kinase activity [GO:0004672 molecular_function] (1); protein phosphorylation [GO:0006468 biological_process] (1)                                                                                                                                                                                                                                                         | Protein kinase domain [IPR000719] (1); Protein kinase-like domain [IPR011009] (1)                                                                                                                                                                                                                                                                                                                                                                                                                             | -                         | C_umbii_01150_mRNA_11,1 | -                    |
| GF0040173 | 0                      | 1                | 0                 | Hypothetical protein (1)                                                    | -                                                                                                                                                                                                                                                                                                                                                                                                                                 | Retroransposon gag domain [IPR00162] (1)                                                                                                                                                                                                                                                                                                                                                                                                                                                                      | -                         | C_umbii_01150_mRNA_10,1 | -                    |
| GF0040172 | 0                      | 1                | 0                 | Hypothetical protein (1)                                                    | carbohydrate metabolic process [GO:0005975 biological_process] (1); polygalacturonase activity [GO:0004050 molecular_function] (1)                                                                                                                                                                                                                                                                                                | Glycoside hydrolase, family 28 [IPR00742] (1); Pectin lyase fold/variable fold [IPR011050] (1); Pectin lyase fold [IPR012334] (1)                                                                                                                                                                                                                                                                                                                                                                             | -                         | C_umbii_01149_mRNA_8,1  | -                    |
| GF0040171 | 0                      | 1                | 0                 | Hypothetical protein (1)                                                    | metabolic process [GO:0008182 biological_process] (1); transferase activity, transferring hexosyl groups [GO:0016758 molecular_function] (1)                                                                                                                                                                                                                                                                                      | GENS complex [IPR021151] (1); UDP-glycosyltransferase [IPR002123] (1)                                                                                                                                                                                                                                                                                                                                                                                                                                         | -                         | C_umbii_01149_mRNA_7,1  | -                    |
| GF0040170 | 0                      | 1                | 0                 | Hypothetical protein (1)                                                    | -                                                                                                                                                                                                                                                                                                                                                                                                                                 | -                                                                                                                                                                                                                                                                                                                                                                                                                                                                                                             | -                         | C_umbii_01148_mRNA_8,1  | -                    |
| GF0040169 | 0                      | 1                | 0                 | Hypothetical protein (1)                                                    | -                                                                                                                                                                                                                                                                                                                                                                                                                                 | -                                                                                                                                                                                                                                                                                                                                                                                                                                                                                                             | -                         | C_umbii_01147_mRNA_9,1  | -                    |
| GF0040168 | 0                      | 1                | 0                 | Monosaccharide transport protein (1)                                        | -                                                                                                                                                                                                                                                                                                                                                                                                                                 | -                                                                                                                                                                                                                                                                                                                                                                                                                                                                                                             | -                         | C_umbii_01147_mRNA_5,1  | -                    |
| GF0040167 | 0                      | 1                | 0                 | Hypothetical protein (1)                                                    | ATP binding [GO:0005524 molecular_function] (1); protein kinase activity [GO:0004672 molecular_function] (1); protein phosphorylation [GO:0006468 biological_process] (1)                                                                                                                                                                                                                                                         | Serine-threonine/tyrosine-protein kinase catalytic domain [IPR01245] (1); Protein kinase domain [IPR000719] (1); Protein kinase-like domain [IPR011009] (1)                                                                                                                                                                                                                                                                                                                                                   | -                         | C_umbii_01147_mRNA_4,1  | -                    |
| GF0040166 | 0                      | 1                | 0                 | Hypothetical protein (1)                                                    | ATP binding [GO:0005524 molecular_function] (1); protein kinase activity [GO:0004672 molecular_function] (1); protein phosphorylation [GO:0006468 biological_process] (1)                                                                                                                                                                                                                                                         | Serine-threonine/tyrosine-protein kinase catalytic domain [IPR01245] (1); Concavulin A-like lectin/glucanase domain [IPR01320] (1); Protein kinase-like domain [IPR011009] (1); Protein kinase domain [IPR000719] (1)                                                                                                                                                                                                                                                                                         | -                         | C_umbii_01147_mRNA_3,1  | -                    |
| GF0040165 | 0                      | 1                | 0                 | Hypothetical protein (1)                                                    | -                                                                                                                                                                                                                                                                                                                                                                                                                                 | -                                                                                                                                                                                                                                                                                                                                                                                                                                                                                                             | -                         | C_umbii_01147_mRNA_12,1 | -                    |
| GF0040164 | 0                      | 1                | 0                 | Flavoprotein whA (1)                                                        | negative regulation of transcription, DNA-templated [GO:0045892 biological_process] (1); oxidoreductase activity [GO:001699] (1); FMN binding [GO:0010181 molecular_function] (1)                                                                                                                                                                                                                                                 | Flavodoxin/nitric oxide synthase [IPR008254] (1); Flavoprotein WhA [IPR010089] (1); Flavoprotein-like domain [IPR020609] (1); NADPH-dependent FMN reductase-like [IPR005025] (1)                                                                                                                                                                                                                                                                                                                              | -                         | C_umbii_01146_mRNA_8,1  | -                    |
| GF0040163 | 0                      | 1                | 0                 | Hypothetical protein (1)                                                    | protein binding [GO:0005515 molecular_function] (1)                                                                                                                                                                                                                                                                                                                                                                               | WD40-YVTY repeat-like containing domain [IPR015943] (1); WD40 repeat, conserved site [IPR01975] (1); WD40-repeat-containing domain [IPR017896] (1); WD40 repeat [IPR001680] (1)                                                                                                                                                                                                                                                                                                                               | -                         | C_umbii_01146_mRNA_15,1 | -                    |
| GF0040162 | 0                      | 1                | 0                 | Mutator-like transposase (1)                                                | -                                                                                                                                                                                                                                                                                                                                                                                                                                 | Transposase, MudR, plant [IPR004332] (1); MLE/E transposase domain [IPR018289] (1)                                                                                                                                                                                                                                                                                                                                                                                                                            | -                         | C_umbii_01146_mRNA_1,1  | -                    |
| GF0040161 | 0                      | 1                | 0                 | Hypothetical protein (1)                                                    | proteolysis [GO:0006508 biological_process] (1); aspartic-type endopeptidase activity [GO:004190 molecular_function] (1)                                                                                                                                                                                                                                                                                                          | Aspartic peptidase domain [IPR021199] (1); Peptidase, AZA, retroviral, catalytic [IPR001995] (1); Reverse transcriptase domain [IPR000077] (1); Retropepsins [IPR018061] (1)                                                                                                                                                                                                                                                                                                                                  | -                         | C_umbii_01145_mRNA_8,1  | -                    |
| GF0040160 | 0                      | 1                | 0                 | Hypothetical protein (1)                                                    | zinc ion binding [GO:0008270 molecular_function] (1); nucleic acid binding [GO:0003676 molecular_function] (1)                                                                                                                                                                                                                                                                                                                    | Zinc finger, CCHC-type [IPR01878] (1)                                                                                                                                                                                                                                                                                                                                                                                                                                                                         | -                         | C_umbii_01145_mRNA_5,1  | -                    |
| GF0040159 | 0                      | 1                | 0                 | Hypothetical protein (1)                                                    | -                                                                                                                                                                                                                                                                                                                                                                                                                                 | -                                                                                                                                                                                                                                                                                                                                                                                                                                                                                                             | -                         | C_umbii_01145_mRNA_4,1  | -                    |
| GF0040158 | 0                      | 1                | 0                 | Hypothetical protein (1)                                                    | -                                                                                                                                                                                                                                                                                                                                                                                                                                 | -                                                                                                                                                                                                                                                                                                                                                                                                                                                                                                             | -                         | C_umbii_01145_mRNA_3,1  | -                    |
| GF0040157 | 0                      | 1                | 0                 | Hypothetical protein (1)                                                    | -                                                                                                                                                                                                                                                                                                                                                                                                                                 | -                                                                                                                                                                                                                                                                                                                                                                                                                                                                                                             | -                         | C_umbii_01145_mRNA_2,1  | -                    |
| GF0040156 | 0                      | 1                | 0                 | Hypothetical protein (1)                                                    | -                                                                                                                                                                                                                                                                                                                                                                                                                                 | -                                                                                                                                                                                                                                                                                                                                                                                                                                                                                                             | -                         | C_umbii_01145_mRNA_12,1 | -                    |
| GF0040155 | 0                      | 1                | 0                 | Hypothetical protein (1)                                                    | -                                                                                                                                                                                                                                                                                                                                                                                                                                 | -                                                                                                                                                                                                                                                                                                                                                                                                                                                                                                             | -                         | C_umbii_01145_mRNA_10,1 | -                    |
| GF0040154 | 0                      | 1                | 0                 | Heavy metal P-type ATPase (1)                                               | integral component of membrane [GO:0016021 cellular_component] (1); cation transport [GO:0006812 biological_process] (1); metal ion binding [GO:0046072 molecular_function] (1); metal ion transport [GO:0030001 biological_process] (1); nucleotide binding [GO:0000166 molecular_function] (1); cation-transporting ATPase activity [GO:0019829 molecular_function] (1); copper ion binding [GO:0005507 molecular_function] (1) | Heavy-metal-associated, conserved site [IPR017869] (1); Heavy metal-associated domain, HMA [IPR006121] (1); Heavy metal-associated domain, copper-associated [IPR006121] (1); P-type ATPase domain [IPR023141] (1); P-type ATPase, A domain [IPR00120] (1); P-type ATPase, cytoplasmic domain [IPR023299] (1); P-type ATPase [IPR001573] (1); P-type ATPase subfamily 1B [IPR027256] (1); P-type ATPase, phosphorylation site [IPR018301] (1)                                                                 | -                         | C_umbii_01144_mRNA_6,1  | -                    |



| ID       | Num. in C. crottenstei | Num. in C. auris | Num. in P. putida | Note                                                               | GO                                                                                                                                                                                                                                                                                                                | InterPro                                                                                                                                                                                                                                                                      | Members in C. crottenstei | Members in C. auris     | Members in P. putida |
|----------|------------------------|------------------|-------------------|--------------------------------------------------------------------|-------------------------------------------------------------------------------------------------------------------------------------------------------------------------------------------------------------------------------------------------------------------------------------------------------------------|-------------------------------------------------------------------------------------------------------------------------------------------------------------------------------------------------------------------------------------------------------------------------------|---------------------------|-------------------------|----------------------|
| GF004082 | 0                      | 1                | 1                 | 0 L-ascorbate peroxidase 1, cytosolic (1)                          | peroxidase activity [GO:0004601 molecular_function] (1); oxidation-reduction process [GO:005114 biological_process] (1); response to oxidative stress [GO:0006979 biological_process] (1); heme binding [GO:0020637 molecular_function] (1)                                                                       | Hem peroxidase, plant/fungal/bacterial [IPRO2016] (1); Peroxidases heme-binding site [IPRO19793] (1); Plant ascorbate peroxidase [IPRO2257] (1); Hem peroxidase [IPRO10255] (1)                                                                                               |                           | C_ushii_01124_mRNA_1.1  | -                    |
| GF004081 | 0                      | 1                | 0                 | 0 Hypothetical protein (1)                                         |                                                                                                                                                                                                                                                                                                                   |                                                                                                                                                                                                                                                                               |                           | C_ushii_01123_mRNA_9.1  | -                    |
| GF004080 | 0                      | 1                | 0                 | 0 Hypothetical protein (1)                                         |                                                                                                                                                                                                                                                                                                                   |                                                                                                                                                                                                                                                                               |                           | C_ushii_01123_mRNA_6.1  | -                    |
| GF004079 | 0                      | 1                | 0                 | 0 Hypothetical protein (1)                                         |                                                                                                                                                                                                                                                                                                                   | Protein kinase-like domain [IPRO11009] (1)                                                                                                                                                                                                                                    |                           | C_ushii_01123_mRNA_5.1  | -                    |
| GF004078 | 0                      | 1                | 0                 | 0 Hypothetical protein (1)                                         |                                                                                                                                                                                                                                                                                                                   |                                                                                                                                                                                                                                                                               |                           | C_ushii_01123_mRNA_3.1  | -                    |
| GF004077 | 0                      | 1                | 0                 | 0 Hypothetical protein (1)                                         | nucleic acid binding [GO:0003676 molecular_function] (1)                                                                                                                                                                                                                                                          | Ribonuclease H-like domain [IPRO12337] (1)                                                                                                                                                                                                                                    |                           | C_ushii_01123_mRNA_2.1  | -                    |
| GF004076 | 0                      | 1                | 0                 | 0 Hypothetical protein (1)                                         | magnesium ion binding [GO:0000287 molecular_function] (1); terpene synthase activity [GO:0010333 molecular_function] (1); lyase activity [GO:0016829 molecular_function] (1)                                                                                                                                      | Isoprenoid synthase domain [IPRO08949] (1); Terpene synthase, metal-binding domain [IPRO06530] (1)                                                                                                                                                                            |                           | C_ushii_01122_mRNA_9.1  | -                    |
| GF004075 | 0                      | 1                | 0                 | 0 Hypothetical protein (1)                                         |                                                                                                                                                                                                                                                                                                                   |                                                                                                                                                                                                                                                                               |                           | C_ushii_01122_mRNA_4.1  | -                    |
| GF004074 | 0                      | 1                | 0                 | 0 Hypothetical protein (1)                                         |                                                                                                                                                                                                                                                                                                                   |                                                                                                                                                                                                                                                                               |                           | C_ushii_01122_mRNA_3.1  | -                    |
| GF004073 | 0                      | 1                | 0                 | 0 Hypothetical protein (1)                                         | ATP-dependent DNA helicase activity [GO:0004003 molecular_function] (1); nucleus [GO:0005634 cellular_component] (1); nucleotide-excision repair [GO:0006289 biological_process] (1); core TFIIH complex [GO:0004439 cellular_component] (1)                                                                      | Transcription factor TFIIH subunit p52/782 [IPRO4598] (1)                                                                                                                                                                                                                     |                           | C_ushii_01122_mRNA_12.1 | -                    |
| GF004072 | 0                      | 1                | 0                 | 0 Hypothetical protein (1)                                         |                                                                                                                                                                                                                                                                                                                   |                                                                                                                                                                                                                                                                               |                           | C_ushii_01122_mRNA_1.1  | -                    |
| GF004071 | 0                      | 1                | 0                 | 0 Hypothetical protein (1)                                         |                                                                                                                                                                                                                                                                                                                   |                                                                                                                                                                                                                                                                               |                           | C_ushii_01121_mRNA_6.1  | -                    |
| GF004070 | 0                      | 1                | 0                 | 0 Hypothetical protein (1)                                         |                                                                                                                                                                                                                                                                                                                   | Domain of unknown function DUF1985 [IPRO15410] (4)                                                                                                                                                                                                                            |                           | C_ushii_01121_mRNA_4.1  | -                    |
| GF004069 | 0                      | 1                | 0                 | 0 Hypothetical protein (1)                                         | ferrous iron binding [GO:0008198 molecular_function] (1); oxidoreductase activity [GO:0001604 molecular_function] (1); cellular aromatic compound metabolic process [GO:0006725 biological_process] (1)                                                                                                           | Ribosomal RNA-processing protein 14.5uracil loop protein 6, C-terminal domain [IPRO29190] (1); Estradiol ring-closure dioxygenase, class III enzyme, subunit B [IPRO04183] (1)                                                                                                |                           | C_ushii_01120_mRNA_4.1  | -                    |
| GF004068 | 0                      | 1                | 0                 | 0 Cytokinin riboside 5'-monophosphate phosphoribidylylase (1)      |                                                                                                                                                                                                                                                                                                                   | LOG family [IPRO31100] (1); Cytokinin riboside 5'-monophosphate phosphoribidylylase LOG [IPRO05269] (1)                                                                                                                                                                       |                           | C_ushii_01119_mRNA_9.1  | -                    |
| GF004067 | 0                      | 1                | 0                 | 0 Hypothetical protein (1)                                         |                                                                                                                                                                                                                                                                                                                   | LOG family [IPRO31100] (1)                                                                                                                                                                                                                                                    |                           | C_ushii_01119_mRNA_8.1  | -                    |
| GF004066 | 0                      | 1                | 0                 | 0 Hypothetical protein (1)                                         |                                                                                                                                                                                                                                                                                                                   | Leucine-rich repeat domain, I domain-like [IPRO2675] (1)                                                                                                                                                                                                                      |                           | C_ushii_01119_mRNA_6.1  | -                    |
| GF004065 | 0                      | 1                | 0                 | 0 Phosphoprotein phosphatase (1)                                   |                                                                                                                                                                                                                                                                                                                   |                                                                                                                                                                                                                                                                               |                           | C_ushii_01119_mRNA_2.1  | -                    |
| GF004064 | 0                      | 1                | 0                 | 0 Hypothetical protein (1)                                         |                                                                                                                                                                                                                                                                                                                   |                                                                                                                                                                                                                                                                               |                           | C_ushii_01118_mRNA_9.1  | -                    |
| GF004063 | 0                      | 1                | 0                 | 0 Hypothetical protein (1)                                         |                                                                                                                                                                                                                                                                                                                   |                                                                                                                                                                                                                                                                               |                           | C_ushii_01118_mRNA_4.1  | -                    |
| GF004062 | 0                      | 1                | 0                 | 0 Hypothetical protein (1)                                         |                                                                                                                                                                                                                                                                                                                   |                                                                                                                                                                                                                                                                               |                           | C_ushii_01117_mRNA_4.1  | -                    |
| GF004061 | 0                      | 1                | 0                 | 0 Hypothetical protein (1)                                         |                                                                                                                                                                                                                                                                                                                   |                                                                                                                                                                                                                                                                               |                           | C_ushii_01116_mRNA_1.1  | -                    |
| GF004060 | 0                      | 1                | 0                 | 0 Hypothetical protein (1)                                         |                                                                                                                                                                                                                                                                                                                   | LOG family [IPRO31100] (1)                                                                                                                                                                                                                                                    |                           | C_ushii_01115_mRNA_5.1  | -                    |
| GF004059 | 0                      | 1                | 0                 | 0 Hypothetical protein (1)                                         |                                                                                                                                                                                                                                                                                                                   |                                                                                                                                                                                                                                                                               |                           | C_ushii_01114_mRNA_9.1  | -                    |
| GF004058 | 0                      | 1                | 0                 | 0 Hypothetical protein (1)                                         |                                                                                                                                                                                                                                                                                                                   |                                                                                                                                                                                                                                                                               |                           | C_ushii_01114_mRNA_8.1  | -                    |
| GF004057 | 0                      | 1                | 0                 | 0 Hypothetical protein (1)                                         |                                                                                                                                                                                                                                                                                                                   |                                                                                                                                                                                                                                                                               |                           | C_ushii_01114_mRNA_5.1  | -                    |
| GF004056 | 0                      | 1                | 0                 | 0 Hypothetical protein (1)                                         |                                                                                                                                                                                                                                                                                                                   |                                                                                                                                                                                                                                                                               |                           | C_ushii_01114_mRNA_3.1  | -                    |
| GF004055 | 0                      | 1                | 0                 | 0 Hypothetical protein (1)                                         |                                                                                                                                                                                                                                                                                                                   |                                                                                                                                                                                                                                                                               |                           | C_ushii_01114_mRNA_13.1 | -                    |
| GF004054 | 0                      | 1                | 0                 | 0 Hypothetical protein (1)                                         |                                                                                                                                                                                                                                                                                                                   |                                                                                                                                                                                                                                                                               |                           | C_ushii_01114_mRNA_12.1 | -                    |
| GF004053 | 0                      | 1                | 0                 | 0 Hypothetical protein (1)                                         |                                                                                                                                                                                                                                                                                                                   | Retrontransposon gag domain [IPRO05162] (1)                                                                                                                                                                                                                                   |                           | C_ushii_01113_mRNA_7.1  | -                    |
| GF004052 | 0                      | 1                | 0                 | 0 Hypothetical protein (1)                                         |                                                                                                                                                                                                                                                                                                                   |                                                                                                                                                                                                                                                                               |                           | C_ushii_01113_mRNA_2.1  | -                    |
| GF004051 | 0                      | 1                | 0                 | 0 Hypothetical protein (1)                                         |                                                                                                                                                                                                                                                                                                                   |                                                                                                                                                                                                                                                                               |                           | C_ushii_01113_mRNA_17.1 | -                    |
| GF004050 | 0                      | 1                | 0                 | 0 Hypothetical protein (1)                                         | oxidation-reduction process [GO:005114 biological_process] (1); oxidoreductase activity [GO:0016491 molecular_function] (1); FAD binding [GO:0071949 molecular_function] (1)                                                                                                                                      | FAD/NAD(P) <sup>+</sup> binding domain [IPRO23753] (1); FAD-binding domain [IPRO02938] (4)                                                                                                                                                                                    |                           | C_ushii_01113_mRNA_15.1 | -                    |
| GF004049 | 0                      | 1                | 0                 | 0 Monooxygenase family protein (1)                                 | oxidation-reduction process [GO:005114 biological_process] (1); oxidoreductase activity [GO:0016491 molecular_function] (1)                                                                                                                                                                                       | FAD/NAD(P) <sup>+</sup> binding domain [IPRO23753] (1)                                                                                                                                                                                                                        |                           | C_ushii_01113_mRNA_14.1 | -                    |
| GF004048 | 0                      | 1                | 0                 | 0 FacO (1)                                                         | FAD binding [GO:0071949 molecular_function] (1); oxidation-reduction process [GO:005114 biological_process] (1); oxidoreductase activity [GO:0016491 molecular_function] (1)                                                                                                                                      | FAD-binding domain [IPRO02938] (1); FAD/NAD(P) <sup>+</sup> binding domain [IPRO23753] (1)                                                                                                                                                                                    |                           | C_ushii_01113_mRNA_13.1 | -                    |
| GF004047 | 0                      | 1                | 0                 | 0 Hypothetical protein (1)                                         | carbohydrate binding [GO:0030246 molecular_function] (1); carbohydrate metabolic process [GO:0005975 biological_process] (1); catalytic activity [GO:0003824 molecular_function] (1); hydrolase activity, hydrolyzing O-glycosyl compounds [GO:0004555 molecular_function] (1)                                    | Glycoside hydrolase family 31, N-terminal domain [IPRO2587] (1); Glycoside hydrolase superfamily [IPRO17853] (1); Galactose mutarotase-like domain [IPRO11013] (1); Glycosyl hydrolases family 31, active site [IPRO30458] (1); Glycoside hydrolase family 31 [IPRO00322] (1) |                           | C_ushii_01112_mRNA_9.1  | -                    |
| GF004046 | 0                      | 1                | 0                 | 0 Pentatricopeptide repeat-containing family protein (1)           | protein binding [GO:0005515 molecular_function] (1)                                                                                                                                                                                                                                                               | Pentatricopeptide repeat [IPRO02885] (1); Tetraatricopeptide-like helical domain [IPRO11990] (1)                                                                                                                                                                              |                           | C_ushii_01112_mRNA_8.1  | -                    |
| GF004045 | 0                      | 1                | 0                 | 0 Hypothetical protein (1)                                         | oxidation-reduction process [GO:005114 biological_process] (1); oxidoreductase activity, acting on paired donors, with incorporation or reduction of molecular oxygen [GO:0016706 molecular_function] (1); iron ion binding [GO:0005506 molecular_function] (1); heme binding [GO:0020037 molecular_function] (1) | Cytochrome P450, E-class, group I [IPRO02401] (1); Cytochrome P450 [IPRO01128] (1)                                                                                                                                                                                            |                           | C_ushii_01111_mRNA_3.1  | -                    |
| GF004044 | 0                      | 1                | 0                 | 0 Hypothetical protein (1)                                         |                                                                                                                                                                                                                                                                                                                   |                                                                                                                                                                                                                                                                               |                           | C_ushii_01111_mRNA_14.1 | -                    |
| GF004043 | 0                      | 1                | 0                 | 0 Hypothetical protein (1)                                         | ecocytosis [GO:0006887 biological_process] (1); ecocyst [GO:0000145 cellular_component] (1)                                                                                                                                                                                                                       | Cullin repeat-like-containing domain [IPRO16159] (1); Ecocyst complex protein Eoc70 [IPRO04140] (1)                                                                                                                                                                           |                           | C_ushii_01111_mRNA_12.1 | -                    |
| GF004042 | 0                      | 1                | 0                 | 0 Hypothetical protein (1)                                         | transferase activity, transferring acyl groups other than amino-acyl groups [GO:0016747 molecular_function] (1)                                                                                                                                                                                                   | Transferase [IPRO03400] (1); Chloramphenicol acetyltransferase-like domain [IPRO23213] (1)                                                                                                                                                                                    |                           | C_ushii_01110_mRNA_9.1  | -                    |
| GF004041 | 0                      | 1                | 0                 | 0 Hypothetical protein (1)                                         |                                                                                                                                                                                                                                                                                                                   |                                                                                                                                                                                                                                                                               |                           | C_ushii_01109_mRNA_9.1  | -                    |
| GF004040 | 0                      | 1                | 0                 | 0 Hypothetical protein (1)                                         |                                                                                                                                                                                                                                                                                                                   |                                                                                                                                                                                                                                                                               |                           | C_ushii_01109_mRNA_6.1  | -                    |
| GF004039 | 0                      | 1                | 0                 | 0 Hypothetical protein (1)                                         |                                                                                                                                                                                                                                                                                                                   |                                                                                                                                                                                                                                                                               |                           | C_ushii_01109_mRNA_10.1 | -                    |
| GF004038 | 0                      | 1                | 0                 | 0 Hypothetical protein (1)                                         |                                                                                                                                                                                                                                                                                                                   |                                                                                                                                                                                                                                                                               |                           | C_ushii_01108_mRNA_8.1  | -                    |
| GF004037 | 0                      | 1                | 0                 | 0 Hypothetical protein (1)                                         |                                                                                                                                                                                                                                                                                                                   |                                                                                                                                                                                                                                                                               |                           | C_ushii_01108_mRNA_7.1  | -                    |
| GF004036 | 0                      | 1                | 0                 | 0 Hypothetical protein (1)                                         |                                                                                                                                                                                                                                                                                                                   |                                                                                                                                                                                                                                                                               |                           | C_ushii_01108_mRNA_3.1  | -                    |
| GF004035 | 0                      | 1                | 0                 | 0 Hypothetical protein (1)                                         |                                                                                                                                                                                                                                                                                                                   |                                                                                                                                                                                                                                                                               |                           | C_ushii_01108_mRNA_2.1  | -                    |
| GF004034 | 0                      | 1                | 0                 | 0 Epoxide hydrolase 3 (1)                                          |                                                                                                                                                                                                                                                                                                                   | Alpha/Beta hydrolase fold [IPRO29058] (1)                                                                                                                                                                                                                                     |                           | C_ushii_01107_mRNA_9.1  | -                    |
| GF004033 | 0                      | 1                | 0                 | 0 Epoxide hydrolase 2 (1)                                          | catalytic activity [GO:0003824 molecular_function] (1)                                                                                                                                                                                                                                                            | Gangliosylpeptide of LTR copia-type [IPRO29472] (1); Epoxide hydrolase-like [IPRO06059] (1); Alpha/Beta hydrolase fold-1 [IPRO00053] (1); Alpha/Beta hydrolase fold [IPRO29058] (1)                                                                                           |                           | C_ushii_01107_mRNA_8.1  | -                    |
| GF004032 | 0                      | 1                | 0                 | 0 Hypothetical protein (1)                                         |                                                                                                                                                                                                                                                                                                                   |                                                                                                                                                                                                                                                                               |                           | C_ushii_01107_mRNA_7.1  | -                    |
| GF004031 | 0                      | 1                | 0                 | 0 Hypothetical protein (1)                                         |                                                                                                                                                                                                                                                                                                                   |                                                                                                                                                                                                                                                                               |                           | C_ushii_01107_mRNA_17.1 | -                    |
| GF004030 | 0                      | 1                | 0                 | 0 Epoxide hydrolase 2 (1)                                          | catalytic activity [GO:0003824 molecular_function] (1)                                                                                                                                                                                                                                                            | Alpha/Beta hydrolase fold [IPRO29058] (1); Alpha/Beta hydrolase fold-1 [IPRO00073] (1); Epoxide hydrolase-like [IPRO06059] (1)                                                                                                                                                |                           | C_ushii_01107_mRNA_12.1 | -                    |
| GF004029 | 0                      | 1                | 0                 | 0 Hypothetical protein (1)                                         |                                                                                                                                                                                                                                                                                                                   | Isopenicillin N synthase-like [IPRO27443] (1)                                                                                                                                                                                                                                 |                           | C_ushii_01106_mRNA_9.1  | -                    |
| GF004028 | 0                      | 1                | 0                 | 0 Hypothetical protein (1)                                         |                                                                                                                                                                                                                                                                                                                   |                                                                                                                                                                                                                                                                               |                           | C_ushii_01106_mRNA_6.1  | -                    |
| GF004027 | 0                      | 1                | 0                 | 0 Hypothetical protein (1)                                         |                                                                                                                                                                                                                                                                                                                   |                                                                                                                                                                                                                                                                               |                           | C_ushii_01106_mRNA_5.1  | -                    |
| GF004026 | 0                      | 1                | 0                 | 0 Hypothetical protein (1)                                         |                                                                                                                                                                                                                                                                                                                   |                                                                                                                                                                                                                                                                               |                           | C_ushii_01106_mRNA_3.1  | -                    |
| GF004025 | 0                      | 1                | 0                 | 0 Hypothetical protein (1)                                         |                                                                                                                                                                                                                                                                                                                   |                                                                                                                                                                                                                                                                               |                           | C_ushii_01106_mRNA_2.1  | -                    |
| GF004024 | 0                      | 1                | 0                 | 0 Protein kinase protein with tetraatricopeptide repeat domain (1) | protein phosphorylation [GO:0006468 biological_process] (1); protein kinase activity [GO:0004672 molecular_function] (1); ATP binding [GO:0005524 molecular_function] (1); protein binding [GO:0005515 molecular_function] (1)                                                                                    | Protein kinase-like domain [IPRO11009] (1); Protein kinase domain [IPRO00719] (1); Serine-threonine/tyrosine-protein kinase catalytic domain [IPRO1245] (1); Tetraatricopeptide-like helical domain [IPRO11990] (1)                                                           |                           | C_ushii_01105_mRNA_4.1  | -                    |
| GF004023 | 0                      | 1                | 0                 | 0 Glutathione peroxidase (1)                                       | glutathione peroxidase activity [GO:0004602 molecular_function] (1); response to oxidative stress [GO:0006979 biological_process] (1); oxidation-reduction process [GO:005114 biological_process] (1)                                                                                                             | Glutathione peroxidase [IPRO08889] (1); Thioredoxin-like fold [IPRO12336] (1)                                                                                                                                                                                                 |                           | C_ushii_01105_mRNA_1.1  | -                    |
| GF004022 | 0                      | 1                | 0                 | 0 Hypothetical protein (1)                                         |                                                                                                                                                                                                                                                                                                                   | Reverse transcriptase domain [IPRO00477] (4)                                                                                                                                                                                                                                  |                           | C_ushii_01104_mRNA_5.1  | -                    |
| GF004021 | 0                      | 1                | 0                 | 0 Hypothetical protein (1)                                         |                                                                                                                                                                                                                                                                                                                   |                                                                                                                                                                                                                                                                               |                           | C_ushii_01104_mRNA_4.1  | -                    |
| GF004020 | 0                      | 1                | 0                 | 0 Hypothetical protein (1)                                         |                                                                                                                                                                                                                                                                                                                   |                                                                                                                                                                                                                                                                               |                           | C_ushii_01104_mRNA_1.1  | -                    |
| GF004019 | 0                      | 1                | 0                 | 0 Hypothetical protein (1)                                         |                                                                                                                                                                                                                                                                                                                   |                                                                                                                                                                                                                                                                               |                           | C_ushii_01103_mRNA_10.1 | -                    |
| GF004018 | 0                      | 1                | 0                 | 0 Hypothetical protein (1)                                         |                                                                                                                                                                                                                                                                                                                   |                                                                                                                                                                                                                                                                               |                           | C_ushii_01103_mRNA_1.1  | -                    |
| GF004017 | 0                      | 1                | 0                 | 0 Hypothetical protein (1)                                         | nucleic acid binding [GO:0003676 molecular_function] (1); protein dimerization activity [GO:0046983 molecular_function] (1)                                                                                                                                                                                       | HAT, C-terminal dimerisation domain [IPRO09090] (1); Ribonuclease H-like domain [IPRO12337] (1)                                                                                                                                                                               |                           | C_ushii_01102_mRNA_8.1  | -                    |
| GF004016 | 0                      | 1                | 0                 | 0 LRR receptor-like kinase family protein (1)                      | protein binding [GO:0005515 molecular_function] (1)                                                                                                                                                                                                                                                               | Leucine-rich repeat domain, I domain-like [IPRO2675] (1); Leucine-rich repeat [IPRO01611] (1); Leucine-rich repeat-containing N-terminal, plant-type [IPRO13210] (4)                                                                                                          |                           | C_ushii_01102_mRNA_6.1  | -                    |
| GF004015 | 0                      | 1                | 0                 | 0 Hypothetical protein (1)                                         |                                                                                                                                                                                                                                                                                                                   |                                                                                                                                                                                                                                                                               |                           | C_ushii_01102_mRNA_3.1  | -                    |
| GF004014 | 0                      | 1                | 0                 | 0 Hypothetical protein (1)                                         |                                                                                                                                                                                                                                                                                                                   |                                                                                                                                                                                                                                                                               |                           | C_ushii_01102_mRNA_1.1  | -                    |

| ID       | Num. in C. crottenstei | Num. in C. auris | Num. in P. putida | Note                                                                    | GO                                                                                                                                                                                                                                                                                                                | InterPro                                                                                                                                                                                                                                                      | Members in C. crottenstei | Members in C. auris     | Members in P. putida |
|----------|------------------------|------------------|-------------------|-------------------------------------------------------------------------|-------------------------------------------------------------------------------------------------------------------------------------------------------------------------------------------------------------------------------------------------------------------------------------------------------------------|---------------------------------------------------------------------------------------------------------------------------------------------------------------------------------------------------------------------------------------------------------------|---------------------------|-------------------------|----------------------|
| GF004013 | 0                      | 1                | 0                 | Hypothetical protein (1)                                                | FMN binding [GO:010181 molecular_function] (1); oxidation-reduction process [GO:005514 biological_process] (1); oxidoreductase activity [GO:010499 molecular_function] (1); catalytic activity [GO:0003624 molecular_function] (1)                                                                                | Aldolase-type TIM barrel [IPRO13785] (1); NADH flavin monooxidoreductase/NADH oxidase, N-terminal [IPRO1155] (1)                                                                                                                                              | -                         | C_ushii_01101_mRNA_5.1  | -                    |
| GF004012 | 0                      | 1                | 0                 | Hypothetical protein (1)                                                | -                                                                                                                                                                                                                                                                                                                 | -                                                                                                                                                                                                                                                             | -                         | C_ushii_01100_mRNA_9.1  | -                    |
| GF004011 | 0                      | 1                | 0                 | Hypothetical protein (1)                                                | -                                                                                                                                                                                                                                                                                                                 | -                                                                                                                                                                                                                                                             | -                         | C_ushii_01100_mRNA_8.1  | -                    |
| GF004010 | 0                      | 1                | 0                 | Hypothetical protein (1)                                                | -                                                                                                                                                                                                                                                                                                                 | -                                                                                                                                                                                                                                                             | -                         | C_ushii_01100_mRNA_7.1  | -                    |
| GF004009 | 0                      | 1                | 0                 | Hypothetical protein (1)                                                | -                                                                                                                                                                                                                                                                                                                 | -                                                                                                                                                                                                                                                             | -                         | C_ushii_01100_mRNA_5.1  | -                    |
| GF004008 | 0                      | 1                | 0                 | Hypothetical protein (1)                                                | nucleic acid binding [GO:0003676 molecular_function] (1); proteolysis [GO:0006508 biological_process] (1); zinc ion binding [GO:0008270 molecular_function] (1); aspartic-type endopeptidase activity [GO:0004190 molecular_function] (1)                                                                         | Aspartic peptidase domain [IPRO21109] (1); Zinc finger, CCH-type [IPRO18178] (1); Retroposin [IPRO18061] (1); Peptidase A2A, retrovirus, catalytic [IPRO19951] (1)                                                                                            | -                         | C_ushii_01100_mRNA_4.1  | -                    |
| GF004007 | 0                      | 1                | 0                 | Hypothetical protein (1)                                                | -                                                                                                                                                                                                                                                                                                                 | -                                                                                                                                                                                                                                                             | -                         | C_ushii_01100_mRNA_26.1 | -                    |
| GF004006 | 0                      | 1                | 0                 | Hypothetical protein (1)                                                | -                                                                                                                                                                                                                                                                                                                 | -                                                                                                                                                                                                                                                             | -                         | C_ushii_01100_mRNA_24.1 | -                    |
| GF004005 | 0                      | 1                | 0                 | NAD-dependent dihydropyrimidine dehydrogenase subunit TrpA (1)          | oxidation-reduction process [GO:005514 biological_process] (1); cytoplasm [GO:0005737 cellular_component] (1); catalytic activity [GO:0003624 molecular_function] (1); oxidoreductase activity, acting on the CH-CH group of donors [GO:0016627 molecular_function] (1)                                           | Dihydropyridine dehydrogenase domain [IPRO05720] (1); Aldolase-type TIM barrel [IPRO13785] (1)                                                                                                                                                                | -                         | C_ushii_01100_mRNA_23.1 | -                    |
| GF004004 | 0                      | 1                | 0                 | Hypothetical protein (1)                                                | -                                                                                                                                                                                                                                                                                                                 | -                                                                                                                                                                                                                                                             | -                         | C_ushii_01100_mRNA_20.1 | -                    |
| GF004003 | 0                      | 1                | 0                 | Hypothetical protein (1)                                                | -                                                                                                                                                                                                                                                                                                                 | -                                                                                                                                                                                                                                                             | -                         | C_ushii_01100_mRNA_19.1 | -                    |
| GF004002 | 0                      | 1                | 0                 | Hypothetical protein (1)                                                | -                                                                                                                                                                                                                                                                                                                 | -                                                                                                                                                                                                                                                             | -                         | C_ushii_01100_mRNA_1.1  | -                    |
| GF004001 | 0                      | 1                | 0                 | Hypothetical protein (1)                                                | zinc ion binding [GO:0008270 molecular_function] (1)                                                                                                                                                                                                                                                              | Zinc finger, SWIM-type [IPRO7527] (1); Zinc finger, PBM-type [IPRO06564] (1)                                                                                                                                                                                  | -                         | C_ushii_01099_mRNA_9.1  | -                    |
| GF004000 | 0                      | 1                | 0                 | Hypothetical protein (1)                                                | -                                                                                                                                                                                                                                                                                                                 | -                                                                                                                                                                                                                                                             | -                         | C_ushii_01099_mRNA_3.1  | -                    |
| GF003999 | 0                      | 1                | 0                 | Hypothetical protein (1)                                                | -                                                                                                                                                                                                                                                                                                                 | -                                                                                                                                                                                                                                                             | -                         | C_ushii_01098_mRNA_7.1  | -                    |
| GF003998 | 0                      | 1                | 0                 | Hypothetical protein (1)                                                | -                                                                                                                                                                                                                                                                                                                 | -                                                                                                                                                                                                                                                             | -                         | C_ushii_01098_mRNA_6.1  | -                    |
| GF003997 | 0                      | 1                | 0                 | Phytoalkaline receptor (1)                                              | -                                                                                                                                                                                                                                                                                                                 | Leucine-rich repeat domain, L domain-like [IPRO23575] (1); Leucine-rich repeat-containing N-terminal plant-type [IPRO13210] (1)                                                                                                                               | -                         | C_ushii_01097_mRNA_9.1  | -                    |
| GF003996 | 0                      | 1                | 0                 | COBw domain-containing protein 1 (1)                                    | -                                                                                                                                                                                                                                                                                                                 | P-loop containing nucleoside triphosphate hydrolase [IPRO27471] (1); CoBw/HyB/UroG domain [IPRO03495] (1); Cobalamin (vitamin B12) biosynthesis CoBw-like, C-terminal [IPRO14291] (1)                                                                         | -                         | C_ushii_01097_mRNA_5.1  | -                    |
| GF003995 | 0                      | 1                | 0                 | Hypothetical protein (1)                                                | -                                                                                                                                                                                                                                                                                                                 | -                                                                                                                                                                                                                                                             | -                         | C_ushii_01097_mRNA_2.1  | -                    |
| GF003994 | 0                      | 1                | 0                 | Hypothetical protein (1)                                                | -                                                                                                                                                                                                                                                                                                                 | -                                                                                                                                                                                                                                                             | -                         | C_ushii_01097_mRNA_12.1 | -                    |
| GF003993 | 0                      | 1                | 0                 | S box F-box protein with the low alkalic sequence polymorphism 1-S2 (1) | protein binding [GO:0005515 molecular_function] (1)                                                                                                                                                                                                                                                               | F-box associated domain, type 1 [IPRO05271] (1); F-box domain [IPRO18101] (1); F-box associated interaction domain [IPRO17451] (1); Galactose oxidase-like, beta-propeller [IPRO11043] (1)                                                                    | -                         | C_ushii_01097_mRNA_11.1 | -                    |
| GF003992 | 0                      | 1                | 0                 | Hypothetical protein (1)                                                | cysteine-type peptidase activity [GO:0003624 molecular_function] (1); proteolysis [GO:0006508 biological_process] (1)                                                                                                                                                                                             | Upl1 protease family, C-terminal catalytic domain [IPRO03653] (1); High mobility group box domain [IPRO09071] (1)                                                                                                                                             | -                         | C_ushii_01097_mRNA_1.1  | -                    |
| GF003991 | 0                      | 1                | 0                 | Hypothetical protein (1)                                                | -                                                                                                                                                                                                                                                                                                                 | -                                                                                                                                                                                                                                                             | -                         | C_ushii_01096_mRNA_9.1  | -                    |
| GF003990 | 0                      | 1                | 0                 | Hypothetical protein (1)                                                | -                                                                                                                                                                                                                                                                                                                 | -                                                                                                                                                                                                                                                             | -                         | C_ushii_01096_mRNA_4.1  | -                    |
| GF003989 | 0                      | 1                | 0                 | Hypothetical protein (1)                                                | -                                                                                                                                                                                                                                                                                                                 | -                                                                                                                                                                                                                                                             | -                         | C_ushii_01096_mRNA_3.1  | -                    |
| GF003988 | 0                      | 1                | 0                 | Hypothetical protein (1)                                                | -                                                                                                                                                                                                                                                                                                                 | -                                                                                                                                                                                                                                                             | -                         | C_ushii_01096_mRNA_2.1  | -                    |
| GF003987 | 0                      | 1                | 0                 | Limonene synthase (1)                                                   | metabolic process [GO:0008152 biological_process] (1); lyase activity [GO:0016229 molecular_function] (1); terpene synthase activity [GO:0010333 molecular_function] (1)                                                                                                                                          | Isoprenoid synthase domain [IPRO08949] (1); Terpenoid cyclase/terpene prenyltransferase alpha-alpha toroid [IPRO08930] (1); Terpene synthase, N-terminal domain [IPRO10960] (1)                                                                               | -                         | C_ushii_01095_mRNA_9.1  | -                    |
| GF003986 | 0                      | 1                | 0                 | Hypothetical protein (1)                                                | -                                                                                                                                                                                                                                                                                                                 | -                                                                                                                                                                                                                                                             | -                         | C_ushii_01095_mRNA_5.1  | -                    |
| GF003985 | 0                      | 1                | 0                 | MADS9 protein (1)                                                       | protein dimerization activity [GO:0046993 molecular_function] (1); DNA binding [GO:0003677 molecular_function] (1)                                                                                                                                                                                                | Retrosynposium gap domain [IPRO05162] (1); Transcription factor, MADS-box [IPRO21101] (1)                                                                                                                                                                     | -                         | C_ushii_01095_mRNA_4.1  | -                    |
| GF003984 | 0                      | 1                | 0                 | Hypothetical protein (1)                                                | -                                                                                                                                                                                                                                                                                                                 | -                                                                                                                                                                                                                                                             | -                         | C_ushii_01095_mRNA_1.1  | -                    |
| GF003983 | 0                      | 1                | 0                 | Hypothetical protein (1)                                                | -                                                                                                                                                                                                                                                                                                                 | -                                                                                                                                                                                                                                                             | -                         | C_ushii_01094_mRNA_5.1  | -                    |
| GF003982 | 0                      | 1                | 0                 | Hypothetical protein (1)                                                | -                                                                                                                                                                                                                                                                                                                 | -                                                                                                                                                                                                                                                             | -                         | C_ushii_01094_mRNA_4.1  | -                    |
| GF003981 | 0                      | 1                | 0                 | Hypothetical protein (1)                                                | -                                                                                                                                                                                                                                                                                                                 | Aspartic peptidase domain [IPRO21109] (1)                                                                                                                                                                                                                     | -                         | C_ushii_01094_mRNA_2.1  | -                    |
| GF003980 | 0                      | 1                | 0                 | Hypothetical protein (1)                                                | -                                                                                                                                                                                                                                                                                                                 | -                                                                                                                                                                                                                                                             | -                         | C_ushii_01094_mRNA_12.1 | -                    |
| GF003979 | 0                      | 1                | 0                 | Hypothetical protein (1)                                                | -                                                                                                                                                                                                                                                                                                                 | -                                                                                                                                                                                                                                                             | -                         | C_ushii_01093_mRNA_7.1  | -                    |
| GF003978 | 0                      | 1                | 0                 | Putative methyltransferase PMT20 (1)                                    | methyltransferase activity [GO:0008168 molecular_function] (1)                                                                                                                                                                                                                                                    | S-adenosyl-L-methionine-dependent methyltransferase [IPRO20261] (1); Putative S-adenosyl-L-methionine-dependent methyltransferase [IPRO04159] (1)                                                                                                             | -                         | C_ushii_01093_mRNA_5.1  | -                    |
| GF003977 | 0                      | 1                | 0                 | Hypothetical protein (1)                                                | ADP binding [GO:004351 molecular_function] (1)                                                                                                                                                                                                                                                                    | P-loop containing nucleoside triphosphate hydrolase [IPRO27471] (1); NB-ARC [IPRO21025] (1); Leucine-rich repeat domain, L domain-like [IPRO23575] (1)                                                                                                        | -                         | C_ushii_01093_mRNA_2.1  | -                    |
| GF003976 | 0                      | 1                | 0                 | Hypothetical protein (1)                                                | -                                                                                                                                                                                                                                                                                                                 | -                                                                                                                                                                                                                                                             | -                         | C_ushii_01092_mRNA_9.1  | -                    |
| GF003975 | 0                      | 1                | 0                 | Hypothetical protein (1)                                                | -                                                                                                                                                                                                                                                                                                                 | -                                                                                                                                                                                                                                                             | -                         | C_ushii_01092_mRNA_8.1  | -                    |
| GF003974 | 0                      | 1                | 0                 | Hypothetical protein (1)                                                | -                                                                                                                                                                                                                                                                                                                 | -                                                                                                                                                                                                                                                             | -                         | C_ushii_01091_mRNA_6.1  | -                    |
| GF003973 | 0                      | 1                | 0                 | Hypothetical protein (1)                                                | -                                                                                                                                                                                                                                                                                                                 | -                                                                                                                                                                                                                                                             | -                         | C_ushii_01091_mRNA_1.1  | -                    |
| GF003972 | 0                      | 1                | 0                 | Hypothetical protein (1)                                                | magnesium ion binding [GO:0000287 molecular_function] (1); lyase activity [GO:0016229 molecular_function] (1); terpene synthase activity [GO:0010333 molecular_function] (1)                                                                                                                                      | Terpene synthase, metal-binding domain [IPRO05630] (1); Isoprenoid synthase domain [IPRO08949] (1)                                                                                                                                                            | -                         | C_ushii_01090_mRNA_4.1  | -                    |
| GF003971 | 0                      | 1                | 0                 | Hypothetical protein (1)                                                | -                                                                                                                                                                                                                                                                                                                 | -                                                                                                                                                                                                                                                             | -                         | C_ushii_01089_mRNA_8.1  | -                    |
| GF003970 | 0                      | 1                | 0                 | Hypothetical protein (1)                                                | transporter activity [GO:0005215 molecular_function] (1); transport [GO:0006010 biological_process] (1); membrane [GO:0016020 cellular_component] (1)                                                                                                                                                             | Proton-dependent oligopeptide transporter family [IPRO01091] (1)                                                                                                                                                                                              | -                         | C_ushii_01089_mRNA_7.1  | -                    |
| GF003969 | 0                      | 1                | 0                 | Non-LTR retrotransposon reverse transcriptase-like (1)                  | -                                                                                                                                                                                                                                                                                                                 | Domain of unknown function DUF4283 [IPRO25558] (1); Reverse transcriptase zinc-binding domain [IPRO25996] (1)                                                                                                                                                 | -                         | C_ushii_01088_mRNA_11.1 | -                    |
| GF003968 | 0                      | 1                | 0                 | Hypothetical protein (1)                                                | -                                                                                                                                                                                                                                                                                                                 | -                                                                                                                                                                                                                                                             | -                         | C_ushii_01087_mRNA_6.1  | -                    |
| GF003967 | 0                      | 1                | 0                 | Ctp protease ATP binding subunit (1)                                    | ATP binding [GO:0005524 molecular_function] (1)                                                                                                                                                                                                                                                                   | CtpA/B family [IPRO1270] (1); Ctp ATPase, C-terminal [IPRO19489] (1); ATPase, AAA-type, core [IPRO03959] (1); CtpA/B conserved site 1 [IPRO18368] (1); P-loop containing nucleoside triphosphate hydrolase [IPRO27471] (1); AAA-ATPase domain [IPRO03993] (1) | -                         | C_ushii_01086_mRNA_4.1  | -                    |
| GF003966 | 0                      | 1                | 0                 | Hypothetical protein (1)                                                | -                                                                                                                                                                                                                                                                                                                 | -                                                                                                                                                                                                                                                             | -                         | C_ushii_01086_mRNA_3.1  | -                    |
| GF003965 | 0                      | 1                | 0                 | Hypothetical protein (1)                                                | nucleic acid binding [GO:0003676 molecular_function] (1)                                                                                                                                                                                                                                                          | Ribonuclease H-like domain [IPRO12337] (1)                                                                                                                                                                                                                    | -                         | C_ushii_01086_mRNA_11.1 | -                    |
| GF003964 | 0                      | 1                | 0                 | Hypothetical protein (1)                                                | -                                                                                                                                                                                                                                                                                                                 | -                                                                                                                                                                                                                                                             | -                         | C_ushii_01085_mRNA_11.1 | -                    |
| GF003963 | 0                      | 1                | 0                 | Hypothetical protein (1)                                                | -                                                                                                                                                                                                                                                                                                                 | -                                                                                                                                                                                                                                                             | -                         | C_ushii_01085_mRNA_1.1  | -                    |
| GF003962 | 0                      | 1                | 0                 | Hypothetical protein (1)                                                | -                                                                                                                                                                                                                                                                                                                 | -                                                                                                                                                                                                                                                             | -                         | C_ushii_01084_mRNA_9.1  | -                    |
| GF003961 | 0                      | 1                | 0                 | Hypothetical protein (1)                                                | -                                                                                                                                                                                                                                                                                                                 | -                                                                                                                                                                                                                                                             | -                         | C_ushii_01084_mRNA_12.1 | -                    |
| GF003960 | 0                      | 1                | 0                 | LRR and NB-ARC domain disease resistance protein (1)                    | -                                                                                                                                                                                                                                                                                                                 | Leucine-rich repeat domain, L domain-like [IPRO23575] (1); Leucine-rich repeat domain, L domain-like [IPRO23575] (1)                                                                                                                                          | -                         | C_ushii_01084_mRNA_11.1 | -                    |
| GF003959 | 0                      | 1                | 0                 | Hypothetical protein (1)                                                | -                                                                                                                                                                                                                                                                                                                 | Winged helix-turn-helix DNA-binding domain [IPRO15991] (1); RNA-binding protein Lupan La [IPRO06630] (1)                                                                                                                                                      | -                         | C_ushii_01084_mRNA_1.1  | -                    |
| GF003958 | 0                      | 1                | 0                 | Hypothetical protein (1)                                                | -                                                                                                                                                                                                                                                                                                                 | Domain of unknown function DUF4218 [IPRO25452] (1)                                                                                                                                                                                                            | -                         | C_ushii_01083_mRNA_8.1  | -                    |
| GF003957 | 0                      | 1                | 0                 | Hypothetical protein (1)                                                | -                                                                                                                                                                                                                                                                                                                 | -                                                                                                                                                                                                                                                             | -                         | C_ushii_01083_mRNA_7.1  | -                    |
| GF003956 | 0                      | 1                | 0                 | Terpene synthase 21, putative isoform (1)                               | lyase activity [GO:0016229 molecular_function] (1); terpene synthase activity [GO:0010333 molecular_function] (1); magnesium ion binding [GO:0000287 molecular_function] (1)                                                                                                                                      | Terpene synthase, metal-binding domain [IPRO05630] (1); Isoprenoid synthase domain [IPRO08949] (1)                                                                                                                                                            | -                         | C_ushii_01083_mRNA_1.1  | -                    |
| GF003955 | 0                      | 1                | 0                 | Hypothetical protein (1)                                                | -                                                                                                                                                                                                                                                                                                                 | -                                                                                                                                                                                                                                                             | -                         | C_ushii_01082_mRNA_8.1  | -                    |
| GF003954 | 0                      | 1                | 0                 | Hypothetical protein (1)                                                | carbohydrate metabolic process [GO:0005975 biological_process] (1)                                                                                                                                                                                                                                                | Glycoside hydrolase, catalytic domain [IPRO13781] (1)                                                                                                                                                                                                         | -                         | C_ushii_01082_mRNA_2.1  | -                    |
| GF003953 | 0                      | 1                | 0                 | Hypothetical protein (1)                                                | -                                                                                                                                                                                                                                                                                                                 | -                                                                                                                                                                                                                                                             | -                         | C_ushii_01082_mRNA_1.1  | -                    |
| GF003952 | 0                      | 1                | 0                 | Hypothetical protein (1)                                                | -                                                                                                                                                                                                                                                                                                                 | MULE transposase domain [IPRO18289] (1)                                                                                                                                                                                                                       | -                         | C_ushii_01081_mRNA_4.1  | -                    |
| GF003951 | 0                      | 1                | 0                 | Germinol 10-hydroxylase-like protein (1)                                | heme binding [GO:0020037 molecular_function] (1); iron ion binding [GO:0005506 molecular_function] (1); oxidation-reduction process [GO:005514 biological_process] (1); oxidoreductase activity, acting on paired donors, with incorporation or reduction of molecular oxygen [GO:0016705 molecular_function] (1) | Cytochrome P450, E-class, group I [IPRO22401] (1); Cytochrome P450, conserved site [IPRO17922] (1); Cytochrome P450 [IPRO01126] (1)                                                                                                                           | -                         | C_ushii_01081_mRNA_3.1  | -                    |
| GF003950 | 0                      | 1                | 0                 | Hypothetical protein (1)                                                | -                                                                                                                                                                                                                                                                                                                 | -                                                                                                                                                                                                                                                             | -                         | C_ushii_01081_mRNA_2.1  | -                    |
| GF003949 | 0                      | 1                | 0                 | Cytosolic thioester S-aminophosphate phosphohydrolyase (1)              | -                                                                                                                                                                                                                                                                                                                 | CheY-like superfamily [IPRO11006] (1); Signal transduction response regulator, receiver domain [IPRO01789] (1)                                                                                                                                                | -                         | C_ushii_01081_mRNA_10.1 | -                    |
| GF003948 | 0                      | 1                | 0                 | Hypothetical protein (1)                                                | phosphorelay signal transduction system [GO:0000160 biological_process] (1)                                                                                                                                                                                                                                       | -                                                                                                                                                                                                                                                             | -                         | C_ushii_01080_mRNA_9.1  | -                    |
| GF003947 | 0                      | 1                | 0                 | Vesicle transport v-SNARE 13 (1)                                        | vesicle-mediated transport [GO:0016192 biological_process] (1); intracellular protein transport [GO:0006886 biological_process] (1); membrane [GO:0016020 cellular_component] (1)                                                                                                                                 | v-SNARE [IPRO10989] (1); Vesicle transport v-SNARE, N-terminal [IPRO07705] (1)                                                                                                                                                                                | -                         | C_ushii_01080_mRNA_7.2  | -                    |
| GF003946 | 0                      | 1                | 0                 | Hypothetical protein (1)                                                | -                                                                                                                                                                                                                                                                                                                 | -                                                                                                                                                                                                                                                             | -                         | C_ushii_01079_mRNA_10.1 | -                    |



| ID       | Num. in <i>C. crottensteini</i> | Num. in <i>C. auris</i> | Num. in <i>P. putida</i> | Note                                                                 | GO                                                                                                                                                                                                                                                                                                                                                                                                                  | InterPro                                                                                                                                                                                                                                                                                                                                           | Members in <i>C. crottensteini</i> | Members in <i>C. auris</i> | Members in <i>P. putida</i> |
|----------|---------------------------------|-------------------------|--------------------------|----------------------------------------------------------------------|---------------------------------------------------------------------------------------------------------------------------------------------------------------------------------------------------------------------------------------------------------------------------------------------------------------------------------------------------------------------------------------------------------------------|----------------------------------------------------------------------------------------------------------------------------------------------------------------------------------------------------------------------------------------------------------------------------------------------------------------------------------------------------|------------------------------------|----------------------------|-----------------------------|
| GF003945 | 0                               | 1                       | 0                        | Hypothetical protein (1)                                             | protein binding [GO:0005515 molecular_function] (1)                                                                                                                                                                                                                                                                                                                                                                 | Tetrapeptide-like helical domain [IPR011990] (1); EF-hand domain pair [IPR011992] (1); Tetrapeptide repeat-containing domain [IPR013026] (1)                                                                                                                                                                                                       | -                                  | C_uni_h1_01079_mRNA_1.1    | -                           |
| GF003944 | 0                               | 1                       | 0                        | Curculin-like (Mannose-binding) lectin family protein (1)            | ATP binding [GO:0005524 molecular_function] (1); protein phosphorylation [GO:0006468 biological_process] (1); protein kinase activity [GO:0004672 molecular_function] (1)                                                                                                                                                                                                                                           | Bull-type lectin domain [IPR001480] (1); PAN/Apple domain [IPR003699] (1); Protein kinase-like domain [IPR011099] (1); Protein kinase domain [IPR000719] (1)                                                                                                                                                                                       | -                                  | C_uni_h1_01078_mRNA_7.1    | -                           |
| GF003943 | 0                               | 1                       | 0                        | Hypothetical protein (1)                                             | protein transport [GO:0015031 biological_process] (1)                                                                                                                                                                                                                                                                                                                                                               | Vacuolar protein sorting-associated protein-1c1 [IPR009061] (1)                                                                                                                                                                                                                                                                                    | -                                  | C_uni_h1_01078_mRNA_12.1   | -                           |
| GF003942 | 0                               | 1                       | 0                        | Hypothetical protein (1)                                             |                                                                                                                                                                                                                                                                                                                                                                                                                     | Concanavalin A-like lectin/glycanase domain [IPR013320] (1); Protein kinase-like domain [IPR011099] (1)                                                                                                                                                                                                                                            | -                                  | C_uni_h1_01078_mRNA_10.1   | -                           |
| GF003941 | 0                               | 1                       | 0                        | Hypothetical protein (1)                                             |                                                                                                                                                                                                                                                                                                                                                                                                                     | Concanavalin A-like lectin/glycanase domain [IPR013320] (1); Protein kinase-like domain [IPR011099] (1)                                                                                                                                                                                                                                            | -                                  | C_uni_h1_01077_mRNA_8.1    | -                           |
| GF003940 | 0                               | 1                       | 0                        | Hypothetical protein (1)                                             | ATP binding [GO:0005524 molecular_function] (1); microtubule motor activity [GO:0003777 molecular_function] (1); microtubule-based movement [GO:0007018 biological_process] (1); protein binding [GO:0005515 molecular_function] (1); microtubule binding [GO:0008017 molecular_function] (1)                                                                                                                       | P-loop containing nucleoside triphosphate hydrolase [IPR027417] (1); Caposin homolog domain [IPR001751] (1); Kinase-like protein [IPR027640] (1); Mitochondrial carrier domain [IPR023395] (1); Kinasin motor domain [IPR001752] (1); Kinasin motor domain, conserved site [IPR019821] (1); Mitochondrial substrate/solute carrier [IPR018108] (1) | -                                  | C_uni_h1_01077_mRNA_5.1    | -                           |
| GF003939 | 0                               | 1                       | 0                        | Hypothetical protein (1)                                             | ligase activity [GO:0016874 molecular_function] (1); biosynthetic process [GO:0009958 biological_process] (1); ATP binding [GO:0005524 molecular_function] (1)                                                                                                                                                                                                                                                      | Mur ligase, central [IPR013221] (1); Mur ligase, C-terminal [IPR004101] (1)                                                                                                                                                                                                                                                                        | -                                  | C_uni_h1_01077_mRNA_12.1   | -                           |
| GF003938 | 0                               | 1                       | 0                        | Hypothetical protein (1)                                             |                                                                                                                                                                                                                                                                                                                                                                                                                     |                                                                                                                                                                                                                                                                                                                                                    | -                                  | C_uni_h1_01077_mRNA_3.1    | -                           |
| GF003937 | 0                               | 1                       | 0                        | Hypothetical protein (1)                                             |                                                                                                                                                                                                                                                                                                                                                                                                                     |                                                                                                                                                                                                                                                                                                                                                    | -                                  | C_uni_h1_01076_mRNA_3.1    | -                           |
| GF003936 | 0                               | 1                       | 0                        | Hypothetical protein (1)                                             | apoptosis [GO:0048046 cellular_component] (1); cellular glucan metabolic process [GO:0006073 biological_process] (1); xyloglucan xyloglycosyl transferase activity [GO:0016762 molecular_function] (1); hydrolase activity, hydrolyzing O-glycosyl compounds [GO:0004553 molecular_function] (1); cell wall [GO:0005618 cellular_component] (1); carbohydrate metabolic process [GO:0005975 biological_process] (1) | Xyloglucan endo-1,4-xyloglycosylase, C-terminal [IPR010713] (1); Nucleotide-diphosphate-sugar transferase [IPR009699] (1); Glycoside hydrolase family 16 [IPR009757] (1); Concanavalin A-like lectin/glycanase domain [IPR013320] (1); Glycoside hydrolase, family 16, active site [IPR008263] (1)                                                 | -                                  | C_uni_h1_01075_mRNA_7.1    | -                           |
| GF003935 | 0                               | 1                       | 0                        | Putative AMP-dependent synthetase and ligase superfamily protein (1) | metabolic process [GO:0008152 biological_process] (1); catalytic activity [GO:0003824 molecular_function] (1)                                                                                                                                                                                                                                                                                                       | AMP-binding enzyme C-terminal domain [IPR025103]; AMP-dependent synthetase/ligase [IPR008073] (1)                                                                                                                                                                                                                                                  | -                                  | C_uni_h1_01075_mRNA_16.1   | -                           |
| GF003934 | 0                               | 1                       | 0                        | Nicotinamide synthase (1)                                            | nicotinamide synthase activity [GO:0003810 molecular_function] (1); carbohydrate metabolic process [GO:0005975 biological_process] (1)                                                                                                                                                                                                                                                                              | Nicotinamide synthase [IPR004298] (1)                                                                                                                                                                                                                                                                                                              | -                                  | C_uni_h1_01075_mRNA_13.1   | -                           |
| GF003933 | 0                               | 1                       | 0                        | Putative xyloglucan endo-1,4-xyloglycosylase/hydrolase protein (1)   | oxidation-reduction process [GO:0055114 biological_process] (1); endooxidoreductase activity [GO:0016491 molecular_function] (1)                                                                                                                                                                                                                                                                                    | Concanavalin A-like lectin/glycanase domain [IPR013320] (1); Glycoside hydrolase, family 16, active site [IPR008263] (1); Glycoside hydrolase family 16 [IPR009757] (1)                                                                                                                                                                            | -                                  | C_uni_h1_01075_mRNA_1.1    | -                           |
| GF003932 | 0                               | 1                       | 0                        | Gibberellin 2-oxidase 2 (1)                                          | oxidation-reduction process [GO:0055114 biological_process] (1); endooxidoreductase activity [GO:0016491 molecular_function] (1)                                                                                                                                                                                                                                                                                    | Non-haem divoxygenase N-terminal domain [IPR029992] (1); Isopectin N synthase-like [IPR007443] (1); Oxoammonium-iron-dependent divoxygenase [IPR005123] (1)                                                                                                                                                                                        | -                                  | C_uni_h1_01074_mRNA_8.1    | -                           |
| GF003931 | 0                               | 1                       | 0                        | CWC16 protein (1)                                                    | nucleic acid binding [GO:0003676 molecular_function] (1); protein dimerization activity [GO:0046983 molecular_function] (1)                                                                                                                                                                                                                                                                                         | CWC16 protein [IPR007590] (1)                                                                                                                                                                                                                                                                                                                      | -                                  | C_uni_h1_01074_mRNA_4.1    | -                           |
| GF003930 | 0                               | 1                       | 0                        | Hypothetical protein (1)                                             |                                                                                                                                                                                                                                                                                                                                                                                                                     | HAT, C-terminal dimerization domain [IPR009090] (1); Ribonuclease H-like domain [IPR012337] (1)                                                                                                                                                                                                                                                    | -                                  | C_uni_h1_01073_mRNA_4.1    | -                           |
| GF003929 | 0                               | 1                       | 0                        | Hypothetical protein (1)                                             |                                                                                                                                                                                                                                                                                                                                                                                                                     | MULE transposase domain [IPR018289] (1)                                                                                                                                                                                                                                                                                                            | -                                  | C_uni_h1_01073_mRNA_3.1    | -                           |
| GF003928 | 0                               | 1                       | 0                        | Hypothetical protein (1)                                             |                                                                                                                                                                                                                                                                                                                                                                                                                     |                                                                                                                                                                                                                                                                                                                                                    | -                                  | C_uni_h1_01072_mRNA_7.1    | -                           |
| GF003927 | 0                               | 1                       | 0                        | Hypothetical protein (1)                                             |                                                                                                                                                                                                                                                                                                                                                                                                                     |                                                                                                                                                                                                                                                                                                                                                    | -                                  | C_uni_h1_01072_mRNA_6.1    | -                           |
| GF003926 | 0                               | 1                       | 0                        | Hypothetical protein (1)                                             |                                                                                                                                                                                                                                                                                                                                                                                                                     |                                                                                                                                                                                                                                                                                                                                                    | -                                  | C_uni_h1_01072_mRNA_3.1    | -                           |
| GF003925 | 0                               | 1                       | 0                        | Hypothetical protein (1)                                             |                                                                                                                                                                                                                                                                                                                                                                                                                     |                                                                                                                                                                                                                                                                                                                                                    | -                                  | C_uni_h1_01072_mRNA_10.1   | -                           |
| GF003924 | 0                               | 1                       | 0                        | Cytochrome P450 71B20 (1)                                            | oxidation-reduction process [GO:0055114 biological_process] (1); oxidoreductase activity, acting on paired donors, with incorporation or reduction of molecular oxygen [GO:0016765 molecular_function] (1); iron ion binding [GO:0005506 molecular_function] (1); heme binding [GO:0002007 molecular_function] (1)                                                                                                  | Cytochrome P450, conserved site [IPR019721] (1); Cytochrome P450 [IPR01128] (1)                                                                                                                                                                                                                                                                    | -                                  | C_uni_h1_01071_mRNA_8.1    | -                           |
| GF003923 | 0                               | 1                       | 0                        | Hypothetical protein (1)                                             | oxidoreductase activity, acting on paired donors, with incorporation or reduction of molecular oxygen [GO:0016765 molecular_function] (1); oxidation-reduction process [GO:0055114 biological_process] (1); heme binding [GO:0002007 molecular_function] (1); iron ion binding [GO:0005506 molecular_function] (1)                                                                                                  | Cytochrome P450 [IPR01128] (1)                                                                                                                                                                                                                                                                                                                     | -                                  | C_uni_h1_01071_mRNA_6.1    | -                           |
| GF003922 | 0                               | 1                       | 0                        | Hypothetical protein (1)                                             |                                                                                                                                                                                                                                                                                                                                                                                                                     | Gag-polypeptide of LTR copia-type [IPR029472] (1)                                                                                                                                                                                                                                                                                                  | -                                  | C_uni_h1_01071_mRNA_5.1    | -                           |
| GF003921 | 0                               | 1                       | 0                        | Hypothetical protein (1)                                             |                                                                                                                                                                                                                                                                                                                                                                                                                     |                                                                                                                                                                                                                                                                                                                                                    | -                                  | C_uni_h1_01071_mRNA_4.1    | -                           |
| GF003920 | 0                               | 1                       | 0                        | Hypothetical protein (1)                                             |                                                                                                                                                                                                                                                                                                                                                                                                                     |                                                                                                                                                                                                                                                                                                                                                    | -                                  | C_uni_h1_01071_mRNA_2.1    | -                           |
| GF003919 | 0                               | 1                       | 0                        | Hypothetical protein (1)                                             |                                                                                                                                                                                                                                                                                                                                                                                                                     |                                                                                                                                                                                                                                                                                                                                                    | -                                  | C_uni_h1_01071_mRNA_1.1    | -                           |
| GF003918 | 0                               | 1                       | 0                        | Putative AMP-dependent synthetase and ligase superfamily protein (1) | catalytic activity [GO:0003824 molecular_function] (1); metabolic process [GO:0008152 biological_process] (1)                                                                                                                                                                                                                                                                                                       | AMP-dependent synthetase/ligase [IPR008073] (1)                                                                                                                                                                                                                                                                                                    | -                                  | C_uni_h1_01070_mRNA_3.1    | -                           |
| GF003917 | 0                               | 1                       | 0                        | Hypothetical protein (1)                                             | GTase activity [GO:0003924 molecular_function] (1); GTP binding [GO:0005525 molecular_function] (1)                                                                                                                                                                                                                                                                                                                 | P-loop containing nucleoside triphosphate hydrolase [IPR027417] (1); Dynamis-type guanine nucleotide-binding (G) domain [IPR030381] (1); Dynamis, GTase region, conserved site [IPR019742] (1); Dynamis superfamily [IPR022812] (1); Dynamis, GTase domain [IPR001401] (1)                                                                         | -                                  | C_uni_h1_01070_mRNA_12.1   | -                           |
| GF003916 | 0                               | 1                       | 0                        | Hypothetical protein (1)                                             |                                                                                                                                                                                                                                                                                                                                                                                                                     | Leucine-rich repeat domain, I domain-like [IPR012675] (1)                                                                                                                                                                                                                                                                                          | -                                  | C_uni_h1_01070_mRNA_1.1    | -                           |
| GF003915 | 0                               | 1                       | 0                        | Hypothetical protein (1)                                             |                                                                                                                                                                                                                                                                                                                                                                                                                     |                                                                                                                                                                                                                                                                                                                                                    | -                                  | C_uni_h1_01069_mRNA_1.1    | -                           |
| GF003914 | 0                               | 1                       | 0                        | Histone demethylase UTY (1)                                          |                                                                                                                                                                                                                                                                                                                                                                                                                     |                                                                                                                                                                                                                                                                                                                                                    | -                                  | C_uni_h1_01067_mRNA_9.1    | -                           |
| GF003913 | 0                               | 1                       | 0                        | Hypothetical protein (1)                                             | zinc ion binding [GO:0008270 molecular_function] (1); oxidation-reduction process [GO:0055114 biological_process] (1); oxidoreductase activity [GO:0016491 molecular_function] (1)                                                                                                                                                                                                                                  | NAD(P)-binding domain [IPR016040] (1); Alcohol dehydrogenase superfamily, zinc-type [IPR003083] (1)                                                                                                                                                                                                                                                | -                                  | C_uni_h1_01067_mRNA_3.1    | -                           |
| GF003912 | 0                               | 1                       | 0                        | Hypothetical protein (1)                                             | zinc ion binding [GO:0008270 molecular_function] (1); oxidoreductase activity [GO:0016491 molecular_function] (1); oxidation-reduction process [GO:0055114 biological_process] (1)                                                                                                                                                                                                                                  | Alcohol dehydrogenase, zinc-type, conserved site [IPR002328] (1); Alcohol dehydrogenase, N-terminal [IPR013154] (1); Alcohol dehydrogenase superfamily, zinc-type [IPR003083] (1); GroES-like [IPR011052] (1)                                                                                                                                      | -                                  | C_uni_h1_01067_mRNA_2.1    | -                           |
| GF003911 | 0                               | 1                       | 0                        | NAC domain-containing protein 42 (1)                                 | regulation of transcription, DNA-templated [GO:0006355 biological_process] (1); DNA binding [GO:0003677 molecular_function] (1)                                                                                                                                                                                                                                                                                     | NAC domain [IPR003441] (1)                                                                                                                                                                                                                                                                                                                         | -                                  | C_uni_h1_01067_mRNA_12.1   | -                           |
| GF003910 | 0                               | 1                       | 0                        | Hypothetical protein (1)                                             |                                                                                                                                                                                                                                                                                                                                                                                                                     |                                                                                                                                                                                                                                                                                                                                                    | -                                  | C_uni_h1_01067_mRNA_11.1   | -                           |
| GF003909 | 0                               | 1                       | 0                        | Hypothetical protein (1)                                             |                                                                                                                                                                                                                                                                                                                                                                                                                     |                                                                                                                                                                                                                                                                                                                                                    | -                                  | C_uni_h1_01067_mRNA_10.1   | -                           |
| GF003908 | 0                               | 1                       | 0                        | Two-component response regulator ARR14 (1)                           | DNA binding [GO:0003677 molecular_function] (1)                                                                                                                                                                                                                                                                                                                                                                     | Myl domain [IPR017930] (1); Helicase domain-like [IPR009097] (1); SANT/Myl domain [IPR010621] (1); Myb domain, plants [IPR066447] (1)                                                                                                                                                                                                              | -                                  | C_uni_h1_01066_mRNA_15.1   | -                           |
| GF003907 | 0                               | 1                       | 0                        | Hypothetical protein (1)                                             |                                                                                                                                                                                                                                                                                                                                                                                                                     | Autophagy-related protein 1010 [IPR012451] (1)                                                                                                                                                                                                                                                                                                     | -                                  | C_uni_h1_01066_mRNA_1.1    | -                           |
| GF003906 | 0                               | 1                       | 0                        | Hypothetical protein (1)                                             | metabolic process [GO:0008152 biological_process] (1); transferase activity, transferring hexoyl groups [GO:0016758 molecular_function] (1)                                                                                                                                                                                                                                                                         | UDP-glucuronosyl/UDP-glucosyltransferase [IPR002213] (1)                                                                                                                                                                                                                                                                                           | -                                  | C_uni_h1_01065_mRNA_9.1    | -                           |
| GF003905 | 0                               | 1                       | 0                        | Hypothetical protein (1)                                             |                                                                                                                                                                                                                                                                                                                                                                                                                     |                                                                                                                                                                                                                                                                                                                                                    | -                                  | C_uni_h1_01065_mRNA_2.1    | -                           |
| GF003904 | 0                               | 1                       | 0                        | UDP-glycosyltransferase 83A1 (1)                                     | transferase activity, transferring hexoyl groups [GO:0016758 molecular_function] (1); metabolic process [GO:0008152 biological_process] (1)                                                                                                                                                                                                                                                                         | UDP-glucuronosyl/UDP-glucosyltransferase [IPR002213] (1)                                                                                                                                                                                                                                                                                           | -                                  | C_uni_h1_01065_mRNA_11.1   | -                           |
| GF003903 | 0                               | 1                       | 0                        | Hypothetical protein (1)                                             |                                                                                                                                                                                                                                                                                                                                                                                                                     |                                                                                                                                                                                                                                                                                                                                                    | -                                  | C_uni_h1_01064_mRNA_1.1    | -                           |
| GF003902 | 0                               | 1                       | 0                        | Hypothetical protein (1)                                             | protein kinase activity [GO:0004672 molecular_function] (1); protein phosphorylation [GO:0006468 biological_process] (1)                                                                                                                                                                                                                                                                                            | Serine-threonine/tyrosine-protein kinase catalytic domain [IPR001451] (1); Protein kinase-like domain [IPR011099] (1)                                                                                                                                                                                                                              | -                                  | C_uni_h1_01063_mRNA_4.1    | -                           |
| GF003901 | 0                               | 1                       | 0                        | Hypothetical protein (1)                                             |                                                                                                                                                                                                                                                                                                                                                                                                                     |                                                                                                                                                                                                                                                                                                                                                    | -                                  | C_uni_h1_01063_mRNA_3.1    | -                           |
| GF003900 | 0                               | 1                       | 0                        | Hypothetical protein (1)                                             |                                                                                                                                                                                                                                                                                                                                                                                                                     | Leucine-rich repeat domain, I domain-like [IPR012675] (1)                                                                                                                                                                                                                                                                                          | -                                  | C_uni_h1_01062_mRNA_3.1    | -                           |
| GF003899 | 0                               | 1                       | 0                        | Hypothetical protein (1)                                             |                                                                                                                                                                                                                                                                                                                                                                                                                     |                                                                                                                                                                                                                                                                                                                                                    | -                                  | C_uni_h1_01062_mRNA_2.1    | -                           |
| GF003898 | 0                               | 1                       | 0                        | Hypothetical protein (1)                                             |                                                                                                                                                                                                                                                                                                                                                                                                                     |                                                                                                                                                                                                                                                                                                                                                    | -                                  | C_uni_h1_01061_mRNA_9.1    | -                           |
| GF003897 | 0                               | 1                       | 0                        | Hypothetical protein (1)                                             |                                                                                                                                                                                                                                                                                                                                                                                                                     |                                                                                                                                                                                                                                                                                                                                                    | -                                  | C_uni_h1_01061_mRNA_8.1    | -                           |
| GF003896 | 0                               | 1                       | 0                        | Disease resistance protein (1)                                       | ADP binding [GO:0042531 molecular_function] (1)                                                                                                                                                                                                                                                                                                                                                                     | NB-ABC [IPR012152] (1); P-loop containing nucleoside triphosphate hydrolase [IPR027417] (1); Leucine-rich repeat domain, I domain-like [IPR012675] (1)                                                                                                                                                                                             | -                                  | C_uni_h1_01061_mRNA_5.1    | -                           |

| ID       | Num. in <i>C. crotolariae</i> | Num. in <i>C. canalis</i> | Num. in <i>P. trifidatus</i> | Note                                                        | GO                                                                                                                                                                                                                                                                                                                 | InterPro                                                                                                                                                                                                                                                                                                                                           | Members in <i>C. crotolariae</i> | Members in <i>C. canalis</i> | Members in <i>P. trifidatus</i> |
|----------|-------------------------------|---------------------------|------------------------------|-------------------------------------------------------------|--------------------------------------------------------------------------------------------------------------------------------------------------------------------------------------------------------------------------------------------------------------------------------------------------------------------|----------------------------------------------------------------------------------------------------------------------------------------------------------------------------------------------------------------------------------------------------------------------------------------------------------------------------------------------------|----------------------------------|------------------------------|---------------------------------|
| GF003895 | 0                             | 1                         | 0                            | Hypothetical protein (1)                                    | ATP binding [GO:0005524 molecular_function] (1); nucleotide binding [GO:0000166 molecular_function] (1); cytoplasm [GO:0005737 cellular_component] (1); serine-sRNA ligase activity [GO:0004826 molecular_function] (1); serine-sRNA aminoacylation [GO:000434 biological_process] (1)                             | Serine-sRNA ligase, type I [IPRO02317] (1)                                                                                                                                                                                                                                                                                                         |                                  | C_umshii_01061_mRNA_2.1      | -                               |
| GF003894 | 0                             | 1                         | 0                            | Hexosyltransferase (1)                                      | transferase activity, transferring glycosyl groups [GO:0101675 molecular_function] (1)                                                                                                                                                                                                                             | Nucleotide-diphosphate-sugar transferase [IPRO29044] (1); Glycosyl transferase, family 8 [IPRO02495] (1)                                                                                                                                                                                                                                           |                                  | C_umshii_01061_mRNA_16.3     | -                               |
| GF003893 | 0                             | 1                         | 0                            | Hypothetical protein (1)                                    |                                                                                                                                                                                                                                                                                                                    |                                                                                                                                                                                                                                                                                                                                                    |                                  | C_umshii_01061_mRNA_13.3     | -                               |
| GF003892 | 0                             | 1                         | 0                            | Hypothetical protein (1)                                    |                                                                                                                                                                                                                                                                                                                    |                                                                                                                                                                                                                                                                                                                                                    |                                  | C_umshii_01061_mRNA_12.3     | -                               |
| GF003891 | 0                             | 1                         | 0                            | Hypothetical protein (1)                                    |                                                                                                                                                                                                                                                                                                                    |                                                                                                                                                                                                                                                                                                                                                    |                                  | C_umshii_01061_mRNA_11.3     | -                               |
| GF003890 | 0                             | 1                         | 0                            | Hypothetical protein (1)                                    |                                                                                                                                                                                                                                                                                                                    |                                                                                                                                                                                                                                                                                                                                                    |                                  | C_umshii_01061_mRNA_1.1      | -                               |
| GF003889 | 0                             | 1                         | 0                            | LRR receptor-like serine/threonine-protein kinase EFR (1)   | protein binding [GO:0005515 molecular_function] (1)                                                                                                                                                                                                                                                                | Leucine-rich repeat [IPRO01611] (1); Leucine-rich repeat-containing N-terminal, plant-type [IPRO13210] (1); Leucine-rich repeat domain, L domain-like [IPRO26751] (1); Leucine-rich repeat, typical subtype [IPRO03591] (1)                                                                                                                        |                                  | C_umshii_01060_mRNA_6.1      | -                               |
| GF003888 | 0                             | 1                         | 0                            | Hypothetical protein (1)                                    |                                                                                                                                                                                                                                                                                                                    |                                                                                                                                                                                                                                                                                                                                                    |                                  | C_umshii_01060_mRNA_3.1      | -                               |
| GF003887 | 0                             | 1                         | 0                            | Hypothetical protein (1)                                    |                                                                                                                                                                                                                                                                                                                    |                                                                                                                                                                                                                                                                                                                                                    |                                  | C_umshii_01060_mRNA_2.1      | -                               |
| GF003886 | 0                             | 1                         | 0                            | Hypothetical protein (1)                                    |                                                                                                                                                                                                                                                                                                                    |                                                                                                                                                                                                                                                                                                                                                    |                                  | C_umshii_01059_mRNA_4.1      | -                               |
| GF003885 | 0                             | 1                         | 0                            | Putative ribonuclease H protein At1g5750 (1)                | nucleic acid binding [GO:0003676 molecular_function] (1)                                                                                                                                                                                                                                                           | Gcp-like domain [IPRO00905] (1); Ribonuclease H-like domain [IPRO12337] (1); Reverse transcriptase zinc-binding domain [IPRO26960] (1)                                                                                                                                                                                                             |                                  | C_umshii_01058_mRNA_9.1      | -                               |
| GF003884 | 0                             | 1                         | 0                            | Hypothetical protein (1)                                    |                                                                                                                                                                                                                                                                                                                    |                                                                                                                                                                                                                                                                                                                                                    |                                  | C_umshii_01058_mRNA_7.1      | -                               |
| GF003883 | 0                             | 1                         | 0                            | LRR receptor-like kinase family protein (1)                 | protein binding [GO:0005515 molecular_function] (1)                                                                                                                                                                                                                                                                | Leucine-rich repeat domain, L domain-like [IPRO26751] (1); Leucine-rich repeat [IPRO01611] (1); Leucine-rich repeat-containing N-terminal, plant-type [IPRO13210] (1)                                                                                                                                                                              |                                  | C_umshii_01057_mRNA_7.1      | -                               |
| GF003882 | 0                             | 1                         | 0                            | Hypothetical protein (1)                                    |                                                                                                                                                                                                                                                                                                                    |                                                                                                                                                                                                                                                                                                                                                    |                                  | C_umshii_01057_mRNA_5.1      | -                               |
| GF003881 | 0                             | 1                         | 0                            | Hypothetical protein (1)                                    |                                                                                                                                                                                                                                                                                                                    |                                                                                                                                                                                                                                                                                                                                                    |                                  | C_umshii_01057_mRNA_4.1      | -                               |
| GF003880 | 0                             | 1                         | 0                            | LRR receptor-like kinase (1)                                | protein binding [GO:0005515 molecular_function] (1)                                                                                                                                                                                                                                                                | Leucine-rich repeat, typical subtype [IPRO03591] (1); Leucine-rich repeat domain, L domain-like [IPRO26751] (1); Leucine-rich repeat [IPRO01611] (1); Leucine-rich repeat-containing N-terminal, plant-type [IPRO13210] (1)                                                                                                                        |                                  | C_umshii_01057_mRNA_3.1      | -                               |
| GF003879 | 0                             | 1                         | 0                            | Hypothetical protein (1)                                    |                                                                                                                                                                                                                                                                                                                    |                                                                                                                                                                                                                                                                                                                                                    |                                  | C_umshii_01057_mRNA_2.1      | -                               |
| GF003878 | 0                             | 1                         | 0                            | Hypothetical protein (1)                                    |                                                                                                                                                                                                                                                                                                                    |                                                                                                                                                                                                                                                                                                                                                    |                                  | C_umshii_01057_mRNA_1.1      | -                               |
| GF003877 | 0                             | 1                         | 0                            | Hypothetical protein (1)                                    |                                                                                                                                                                                                                                                                                                                    |                                                                                                                                                                                                                                                                                                                                                    |                                  | C_umshii_01056_mRNA_11.3     | -                               |
| GF003876 | 0                             | 1                         | 0                            | Hypothetical protein (1)                                    |                                                                                                                                                                                                                                                                                                                    |                                                                                                                                                                                                                                                                                                                                                    |                                  | C_umshii_01055_mRNA_2.1      | -                               |
| GF003875 | 0                             | 1                         | 0                            | Hypothetical protein (1)                                    |                                                                                                                                                                                                                                                                                                                    |                                                                                                                                                                                                                                                                                                                                                    |                                  | C_umshii_01055_mRNA_1.1      | -                               |
| GF003874 | 0                             | 1                         | 0                            | Hypothetical protein (1)                                    |                                                                                                                                                                                                                                                                                                                    |                                                                                                                                                                                                                                                                                                                                                    |                                  | C_umshii_01054_mRNA_6.1      | -                               |
| GF003873 | 0                             | 1                         | 0                            | Hypothetical protein (1)                                    |                                                                                                                                                                                                                                                                                                                    |                                                                                                                                                                                                                                                                                                                                                    |                                  | C_umshii_01054_mRNA_5.1      | -                               |
| GF003872 | 0                             | 1                         | 0                            | Hypothetical protein (1)                                    |                                                                                                                                                                                                                                                                                                                    |                                                                                                                                                                                                                                                                                                                                                    |                                  | C_umshii_01054_mRNA_4.1      | -                               |
| GF003871 | 0                             | 1                         | 0                            | Hypothetical protein (1)                                    |                                                                                                                                                                                                                                                                                                                    |                                                                                                                                                                                                                                                                                                                                                    |                                  | C_umshii_01054_mRNA_2.1      | -                               |
| GF003870 | 0                             | 1                         | 0                            | Hypothetical protein (1)                                    |                                                                                                                                                                                                                                                                                                                    |                                                                                                                                                                                                                                                                                                                                                    |                                  | C_umshii_01054_mRNA_1.1      | -                               |
| GF003869 | 0                             | 1                         | 0                            | Hypothetical protein (1)                                    |                                                                                                                                                                                                                                                                                                                    |                                                                                                                                                                                                                                                                                                                                                    |                                  | C_umshii_01053_mRNA_7.1      | -                               |
| GF003868 | 0                             | 1                         | 0                            | Hypothetical protein (1)                                    |                                                                                                                                                                                                                                                                                                                    |                                                                                                                                                                                                                                                                                                                                                    |                                  | C_umshii_01053_mRNA_5.1      | -                               |
| GF003867 | 0                             | 1                         | 0                            | Hypothetical protein (1)                                    |                                                                                                                                                                                                                                                                                                                    |                                                                                                                                                                                                                                                                                                                                                    |                                  | C_umshii_01053_mRNA_4.1      | -                               |
| GF003866 | 0                             | 1                         | 0                            | Hypothetical protein (1)                                    |                                                                                                                                                                                                                                                                                                                    |                                                                                                                                                                                                                                                                                                                                                    |                                  | C_umshii_01053_mRNA_13.1     | -                               |
| GF003865 | 0                             | 1                         | 0                            | Hypothetical protein (1)                                    |                                                                                                                                                                                                                                                                                                                    |                                                                                                                                                                                                                                                                                                                                                    |                                  | C_umshii_01052_mRNA_9.1      | -                               |
| GF003864 | 0                             | 1                         | 0                            | Hypothetical protein (1)                                    |                                                                                                                                                                                                                                                                                                                    |                                                                                                                                                                                                                                                                                                                                                    |                                  | C_umshii_01052_mRNA_8.1      | -                               |
| GF003863 | 0                             | 1                         | 0                            | Hypothetical protein (1)                                    |                                                                                                                                                                                                                                                                                                                    |                                                                                                                                                                                                                                                                                                                                                    |                                  | C_umshii_01052_mRNA_3.1      | -                               |
| GF003862 | 0                             | 1                         | 0                            | Hypothetical protein (1)                                    |                                                                                                                                                                                                                                                                                                                    |                                                                                                                                                                                                                                                                                                                                                    |                                  | C_umshii_01052_mRNA_10.1     | -                               |
| GF003861 | 0                             | 1                         | 0                            | Hypothetical protein (1)                                    |                                                                                                                                                                                                                                                                                                                    |                                                                                                                                                                                                                                                                                                                                                    |                                  | C_umshii_01052_mRNA_1.1      | -                               |
| GF003860 | 0                             | 1                         | 0                            | Tryptophan synthase alpha chain (1)                         | metabolic process [GO:0008152 biological_process] (1); catalytic activity [GO:0003824 molecular_function] (1); tryptophan synthase activity [GO:0004834 molecular_function] (1); tryptophan metabolic process [GO:0006568 biological_process] (1)                                                                  | Tryptophan synthase, alpha chain [IPRO02028] (1); Alkalase-type TIM barrel [IPRO13785] (1); Ribulose-phosphate binding barrel [IPRO11060] (1)                                                                                                                                                                                                      |                                  | C_umshii_01051_mRNA_6.1      | -                               |
| GF003859 | 0                             | 1                         | 0                            | Hexosyltransferase (1)                                      | transferase activity, transferring glycosyl groups [GO:0101675 molecular_function] (1)                                                                                                                                                                                                                             | Glycosyl transferase, family 8 [IPRO02495] (1); Nucleotide-diphosphate-sugar transferase [IPRO29044] (1)                                                                                                                                                                                                                                           |                                  | C_umshii_01050_mRNA_7.1      | -                               |
| GF003858 | 0                             | 1                         | 0                            | Hypothetical protein (1)                                    |                                                                                                                                                                                                                                                                                                                    |                                                                                                                                                                                                                                                                                                                                                    |                                  | C_umshii_01048_mRNA_4.1      | -                               |
| GF003857 | 0                             | 1                         | 0                            | Phosphotyrosyl/tyrosinase-like cyclase (1)                  |                                                                                                                                                                                                                                                                                                                    | ALK synthase-related protein, C-terminal domain [IPRO10918] (1)                                                                                                                                                                                                                                                                                    |                                  | C_umshii_01048_mRNA_13.1     | -                               |
| GF003856 | 0                             | 1                         | 0                            | Hypothetical protein (1)                                    |                                                                                                                                                                                                                                                                                                                    |                                                                                                                                                                                                                                                                                                                                                    |                                  | C_umshii_01047_mRNA_7.1      | -                               |
| GF003855 | 0                             | 1                         | 0                            | Flavonol 3',5'-hydroxylase (1)                              | oxidoreductase activity, acting on paired donors, with incorporation or reduction of molecular oxygen [GO:0016795 molecular_function] (1); oxidation-reduction process [GO:0055114 biological_process] (1); iron ion binding [GO:0005506 molecular_function] (1); heme binding [GO:0020037 molecular_function] (1) | Cytochrome P450, C-class, group I [IPRO02401] (1); Cytochrome P450, conserved site [IPRO17972] (1); Cytochrome P450 [IPRO01128] (1)                                                                                                                                                                                                                |                                  | C_umshii_01047_mRNA_4.1      | -                               |
| GF003854 | 0                             | 1                         | 0                            | Hypothetical protein (1)                                    |                                                                                                                                                                                                                                                                                                                    |                                                                                                                                                                                                                                                                                                                                                    |                                  | C_umshii_01047_mRNA_1.1      | -                               |
| GF003853 | 0                             | 1                         | 0                            | Hypothetical protein (1)                                    |                                                                                                                                                                                                                                                                                                                    |                                                                                                                                                                                                                                                                                                                                                    |                                  | C_umshii_01046_mRNA_7.1      | -                               |
| GF003852 | 0                             | 1                         | 0                            | Hypothetical protein (1)                                    |                                                                                                                                                                                                                                                                                                                    |                                                                                                                                                                                                                                                                                                                                                    |                                  | C_umshii_01046_mRNA_1.1      | -                               |
| GF003851 | 0                             | 1                         | 0                            | Hypothetical protein (1)                                    |                                                                                                                                                                                                                                                                                                                    |                                                                                                                                                                                                                                                                                                                                                    |                                  | C_umshii_01045_mRNA_9.1      | -                               |
| GF003850 | 0                             | 1                         | 0                            | Hypothetical protein (1)                                    |                                                                                                                                                                                                                                                                                                                    |                                                                                                                                                                                                                                                                                                                                                    |                                  | C_umshii_01045_mRNA_8.1      | -                               |
| GF003849 | 0                             | 1                         | 0                            | Hypothetical protein (1)                                    |                                                                                                                                                                                                                                                                                                                    |                                                                                                                                                                                                                                                                                                                                                    |                                  | C_umshii_01045_mRNA_4.1      | -                               |
| GF003848 | 0                             | 1                         | 0                            | Hypothetical protein (1)                                    |                                                                                                                                                                                                                                                                                                                    |                                                                                                                                                                                                                                                                                                                                                    |                                  | C_umshii_01045_mRNA_3.1      | -                               |
| GF003847 | 0                             | 1                         | 0                            | Epidermis-specific secreted glycoprotein EPI1, putative (1) |                                                                                                                                                                                                                                                                                                                    | Bull-type lectin domain [IPRO01480] (1)                                                                                                                                                                                                                                                                                                            |                                  | C_umshii_01045_mRNA_15.1     | -                               |
| GF003846 | 0                             | 1                         | 0                            | Epidermis-specific secreted EPI-like glycoprotein (1)       | recognition of pollen [GO:004544 biological_process] (1)                                                                                                                                                                                                                                                           | PAN-apple domain [IPRO03609] (1); S-locus glycoprotein domain [IPRO00838] (1)                                                                                                                                                                                                                                                                      |                                  | C_umshii_01045_mRNA_14.1     | -                               |
| GF003845 | 0                             | 1                         | 0                            | Hypothetical protein (1)                                    |                                                                                                                                                                                                                                                                                                                    |                                                                                                                                                                                                                                                                                                                                                    |                                  | C_umshii_01045_mRNA_1.1      | -                               |
| GF003844 | 0                             | 1                         | 0                            | Hypothetical protein (1)                                    |                                                                                                                                                                                                                                                                                                                    |                                                                                                                                                                                                                                                                                                                                                    |                                  | C_umshii_01044_mRNA_13.3     | -                               |
| GF003843 | 0                             | 1                         | 0                            | Hypothetical protein (1)                                    |                                                                                                                                                                                                                                                                                                                    |                                                                                                                                                                                                                                                                                                                                                    |                                  | C_umshii_01044_mRNA_12.3     | -                               |
| GF003842 | 0                             | 1                         | 0                            | Putative disease resistance protein Cf-2.1 (1)              | protein binding [GO:0005515 molecular_function] (1)                                                                                                                                                                                                                                                                | Leucine-rich repeat [IPRO01611] (1); Leucine-rich repeat-containing N-terminal, plant-type [IPRO13210] (1); Leucine-rich repeat domain, L domain-like [IPRO26751] (1); Leucine-rich repeat, typical subtype [IPRO03591] (1)                                                                                                                        |                                  | C_umshii_01043_mRNA_2.1      | -                               |
| GF003841 | 0                             | 1                         | 0                            | LRR receptor-like kinase (1)                                | protein binding [GO:0005515 molecular_function] (1); protein phosphorylation [GO:0006468 biological_process] (1); protein kinase activity [GO:0006712 molecular_function] (1)                                                                                                                                      | Leucine-rich repeat [IPRO01611] (1); Serine/threonine/tyrosine-protein kinase catalytic domain [IPRO01245] (1); Leucine-rich repeat-containing N-terminal, plant-type [IPRO13210] (1); Protein kinase-like domain [IPRO11009] (1); Leucine-rich repeat domain, L domain-like [IPRO26751] (1); Leucine-rich repeat, typical subtype [IPRO03591] (1) |                                  | C_umshii_01043_mRNA_1.1      | -                               |
| GF003840 | 0                             | 1                         | 0                            | Hypothetical protein (1)                                    |                                                                                                                                                                                                                                                                                                                    |                                                                                                                                                                                                                                                                                                                                                    |                                  | C_umshii_01042_mRNA_4.1      | -                               |
| GF003839 | 0                             | 1                         | 0                            | Hypothetical protein (1)                                    |                                                                                                                                                                                                                                                                                                                    |                                                                                                                                                                                                                                                                                                                                                    |                                  | C_umshii_01042_mRNA_2.1      | -                               |
| GF003838 | 0                             | 1                         | 0                            | Hypothetical protein (1)                                    |                                                                                                                                                                                                                                                                                                                    |                                                                                                                                                                                                                                                                                                                                                    |                                  | C_umshii_01042_mRNA_1.1      | -                               |
| GF003837 | 0                             | 1                         | 0                            | Hypothetical protein (1)                                    |                                                                                                                                                                                                                                                                                                                    |                                                                                                                                                                                                                                                                                                                                                    |                                  | C_umshii_01041_mRNA_6.1      | -                               |
| GF003836 | 0                             | 1                         | 0                            | Hypothetical protein (1)                                    |                                                                                                                                                                                                                                                                                                                    |                                                                                                                                                                                                                                                                                                                                                    |                                  | C_umshii_01041_mRNA_14.3     | -                               |
| GF003835 | 0                             | 1                         | 0                            | Hypothetical protein (1)                                    |                                                                                                                                                                                                                                                                                                                    |                                                                                                                                                                                                                                                                                                                                                    |                                  | C_umshii_01041_mRNA_13.3     | -                               |
| GF003834 | 0                             | 1                         | 0                            | Hypothetical protein (1)                                    | oxidation-reduction process [GO:0055114 biological_process] (1); oxidoreductase activity [GO:0016497 molecular_function] (1); copper ion binding [GO:0005507 molecular_function] (1)                                                                                                                               | Mulhopper oxidase, copper-binding site [IPRO02551] (1); Mulhopper oxidases, conserved site [IPRO31381] (1); Mulhopper oxidase, type-2 [IPRO11706] (1); Cupredoxin [IPRO08972] (1)                                                                                                                                                                  |                                  | C_umshii_01041_mRNA_12.1     | -                               |
| GF003833 | 0                             | 1                         | 0                            | Hypothetical protein (1)                                    | oxidation-reduction process [GO:0055114 biological_process] (1); oxidoreductase activity [GO:0016497 molecular_function] (1)                                                                                                                                                                                       | Mulhopper oxidase, type 1 [IPRO01117] (1); Cupredoxin [IPRO08972] (1)                                                                                                                                                                                                                                                                              |                                  | C_umshii_01041_mRNA_11.1     | -                               |
| GF003832 | 0                             | 1                         | 0                            | Hypothetical protein (1)                                    | aspartic-type endopeptidase activity [GO:0004190 molecular_function] (1); proteolysis [GO:0006508 biological_process] (1)                                                                                                                                                                                          | Agariculin peptidase, active site [IPRO01969] (1)                                                                                                                                                                                                                                                                                                  |                                  | C_umshii_01040_mRNA_9.1      | -                               |
| GF003831 | 0                             | 1                         | 0                            | Hypothetical protein (1)                                    |                                                                                                                                                                                                                                                                                                                    |                                                                                                                                                                                                                                                                                                                                                    |                                  | C_umshii_01040_mRNA_7.1      | -                               |
| GF003830 | 0                             | 1                         | 0                            | Early nodulin-like protein 3 (1)                            | electron carrier activity [GO:0009055 molecular_function] (1)                                                                                                                                                                                                                                                      | Cupredoxin [IPRO08972] (1); Phytoeytin domain [IPRO03245] (1)                                                                                                                                                                                                                                                                                      |                                  | C_umshii_01040_mRNA_5.1      | -                               |
| GF003829 | 0                             | 1                         | 0                            | Hypothetical protein (1)                                    |                                                                                                                                                                                                                                                                                                                    |                                                                                                                                                                                                                                                                                                                                                    |                                  | C_umshii_01040_mRNA_4.1      | -                               |
| GF003828 | 0                             | 1                         | 0                            | Hypothetical protein (1)                                    |                                                                                                                                                                                                                                                                                                                    |                                                                                                                                                                                                                                                                                                                                                    |                                  | C_umshii_01040_mRNA_3.1      | -                               |
| GF003827 | 0                             | 1                         | 0                            | Hypothetical protein (1)                                    |                                                                                                                                                                                                                                                                                                                    |                                                                                                                                                                                                                                                                                                                                                    |                                  | C_umshii_01040_mRNA_2.1      | -                               |
| GF003826 | 0                             | 1                         | 0                            | Hypothetical protein (1)                                    |                                                                                                                                                                                                                                                                                                                    |                                                                                                                                                                                                                                                                                                                                                    |                                  | C_umshii_01040_mRNA_1.1      | -                               |
| GF003825 | 0                             | 1                         | 0                            | Hypothetical protein (1)                                    |                                                                                                                                                                                                                                                                                                                    |                                                                                                                                                                                                                                                                                                                                                    |                                  | C_umshii_01039_mRNA_5.1      | -                               |
| GF003824 | 0                             | 1                         | 0                            | Hypothetical protein (1)                                    |                                                                                                                                                                                                                                                                                                                    |                                                                                                                                                                                                                                                                                                                                                    |                                  | C_umshii_01039_mRNA_4.1      | -                               |
| GF003823 | 0                             | 1                         | 0                            | Hypothetical protein (1)                                    | carbohydrate metabolic process [GO:0005975 biological_process] (1)                                                                                                                                                                                                                                                 | Glycoside hydrolase, catalytic domain [IPRO13781] (1)                                                                                                                                                                                                                                                                                              |                                  | C_umshii_01039_mRNA_3.1      | -                               |
| GF003822 | 0                             | 1                         | 0                            | Hypothetical protein (1)                                    |                                                                                                                                                                                                                                                                                                                    |                                                                                                                                                                                                                                                                                                                                                    |                                  | C_umshii_01038_mRNA_2.1      | -                               |

| ID        | Num. in C. crotolariae | Num. in C. caudata | Num. in P. trifolium | Note                                                              | GO                                                                                                                                                                                                                                                                                                                 | InterPro                                                                                                                                                                                                                                                                            | Members in C. crotolariae | Members in C. caudata   | Members in P. trifolium |
|-----------|------------------------|--------------------|----------------------|-------------------------------------------------------------------|--------------------------------------------------------------------------------------------------------------------------------------------------------------------------------------------------------------------------------------------------------------------------------------------------------------------|-------------------------------------------------------------------------------------------------------------------------------------------------------------------------------------------------------------------------------------------------------------------------------------|---------------------------|-------------------------|-------------------------|
| GF0039821 | 0                      | 1                  | 1                    | Putative ATP-dependent RNA helicase DEX36 (1)                     | helicase activity [GO:0004386 molecular_function] (1)                                                                                                                                                                                                                                                              | P-loop containing nucleoside triphosphate hydrolase [IPRO27471] (1); Domain of unknown function DUF1665 [IPRO11709] (1); Helicase-associated domain [IPRO27562] (1); Double-stranded RNA-binding domain [IPRO14720] (1)                                                             | -                         | C_ushii_01038_mRNA_1.1  | -                       |
| GF0039820 | 0                      | 1                  | 1                    | NBS-LRR type disease resistance protein (1)                       | -                                                                                                                                                                                                                                                                                                                  | -                                                                                                                                                                                                                                                                                   | -                         | C_ushii_01037_mRNA_7.1  | -                       |
| GF0039819 | 0                      | 1                  | 1                    | DUF247 domain protein (1)                                         | -                                                                                                                                                                                                                                                                                                                  | Protein of unknown function DUF247; plant [IPRO04156] (1)                                                                                                                                                                                                                           | -                         | C_ushii_01037_mRNA_6.1  | -                       |
| GF0039818 | 0                      | 1                  | 1                    | Hypothetical protein (1)                                          | -                                                                                                                                                                                                                                                                                                                  | -                                                                                                                                                                                                                                                                                   | -                         | C_ushii_01037_mRNA_3.1  | -                       |
| GF0039817 | 0                      | 1                  | 1                    | CC-NBS-LRR disease resistance protein (1)                         | ADP binding [GO:0044351 molecular_function] (1)                                                                                                                                                                                                                                                                    | NB-ARC [IPRO02182] (1); P-loop containing nucleoside triphosphate hydrolase [IPRO27471] (1)                                                                                                                                                                                         | -                         | C_ushii_01037_mRNA_1.1  | -                       |
| GF0039816 | 0                      | 1                  | 1                    | Hypothetical protein (1)                                          | -                                                                                                                                                                                                                                                                                                                  | Leucine-rich repeat domain, L domain-like [IPRO26751] (1)                                                                                                                                                                                                                           | -                         | C_ushii_01036_mRNA_2.1  | -                       |
| GF0039815 | 0                      | 1                  | 1                    | Hypothetical protein (1)                                          | -                                                                                                                                                                                                                                                                                                                  | -                                                                                                                                                                                                                                                                                   | -                         | C_ushii_01036_mRNA_12.1 | -                       |
| GF0039814 | 0                      | 1                  | 1                    | Hypothetical protein (1)                                          | nucleic acid binding [GO:0003676 molecular_function] (1)                                                                                                                                                                                                                                                           | Ribonuclease H-like domain [IPRO12337] (1)                                                                                                                                                                                                                                          | -                         | C_ushii_01035_mRNA_3.1  | -                       |
| GF0039813 | 0                      | 1                  | 1                    | Hypothetical protein (1)                                          | -                                                                                                                                                                                                                                                                                                                  | -                                                                                                                                                                                                                                                                                   | -                         | C_ushii_01035_mRNA_2.1  | -                       |
| GF0039812 | 0                      | 1                  | 1                    | Caffeic acid 3-O-methyltransferase (1)                            | methyltransferase activity [GO:0008168 molecular_function] (1); protein dimerization activity [GO:0046983 molecular_function] (1); O-methyltransferase activity [GO:0008171 molecular_function] (1)                                                                                                                | S-adenosyl-L-methionine-dependent methyltransferase [IPRO29603] (1); Plant methyltransferase dimerization [IPRO12967] (1); O-methyltransferase CDMT-type [IPRO16661] (1); Winged helix-turn-helix DNA-binding domain [IPRO11991] (1); O-methyltransferase, family 2 [IPRO10771] (1) | -                         | C_ushii_01034_mRNA_9.1  | -                       |
| GF0039811 | 0                      | 1                  | 1                    | Cytochrome P450 83B1 (1)                                          | heme binding [GO:0020037 molecular_function] (1); iron ion binding [GO:0005506 molecular_function] (1); oxidoreductase activity, acting on paired donors, with incorporation or reduction of molecular oxygen [GO:0016765 molecular_function] (1); oxidation-reduction process [GO:0055114 biological_process] (1) | Cytochrome P450, E-class, group I [IPRO28010] (1); Cytochrome P450, conserved site [IPRO17922] (1); Cytochrome P450 [IPRO01128] (1)                                                                                                                                                 | -                         | C_ushii_01034_mRNA_7.1  | -                       |
| GF0039810 | 0                      | 1                  | 1                    | Hypothetical protein (1)                                          | O-methyltransferase activity [GO:0008171 molecular_function] (1)                                                                                                                                                                                                                                                   | O-methyltransferase, family 2 [IPRO10771] (1); Winged helix-turn-helix DNA-binding domain [IPRO11991] (1); S-adenosyl-L-methionine-dependent methyltransferase [IPRO29603] (1)                                                                                                      | -                         | C_ushii_01034_mRNA_3.1  | -                       |
| GF0039809 | 0                      | 1                  | 1                    | Hypothetical protein (1)                                          | -                                                                                                                                                                                                                                                                                                                  | -                                                                                                                                                                                                                                                                                   | -                         | C_ushii_01034_mRNA_15.1 | -                       |
| GF0039808 | 0                      | 1                  | 1                    | CAL1 autoinducer sensor kinase/phosphatase cpsQ1 (1)              | oxidation-reduction process [GO:0055114 biological_process] (1); oxidoreductase activity, acting on paired donors, with incorporation or reduction of molecular oxygen [GO:0016765 molecular_function] (1); heme binding [GO:0020037 molecular_function] (1); iron ion binding [GO:0005506 molecular_function] (1) | Harbinger transposase-derived nuclease domain [IPRO27906] (1); Myb/SANT-like domain [IPRO24752] (1)                                                                                                                                                                                 | -                         | C_ushii_01034_mRNA_13.1 | -                       |
| GF0039807 | 0                      | 1                  | 1                    | Cytochrome P450 83B1 (1)                                          | oxidation-reduction process [GO:0055114 biological_process] (1); oxidoreductase activity, acting on paired donors, with incorporation or reduction of molecular oxygen [GO:0016765 molecular_function] (1); heme binding [GO:0020037 molecular_function] (1); iron ion binding [GO:0005506 molecular_function] (1) | Cytochrome P450, E-class, group I [IPRO28010] (1); Cytochrome P450 [IPRO01128] (1)                                                                                                                                                                                                  | -                         | C_ushii_01034_mRNA_12.1 | -                       |
| GF0039806 | 0                      | 1                  | 1                    | Caffeic acid 3-O-methyltransferase (1)                            | protein dimerization activity [GO:0046983 molecular_function] (1)                                                                                                                                                                                                                                                  | Plant methyltransferase dimerization [IPRO12967] (1); Winged helix-turn-helix DNA-binding domain [IPRO11991] (1)                                                                                                                                                                    | -                         | C_ushii_01034_mRNA_11.1 | -                       |
| GF0039805 | 0                      | 1                  | 1                    | Hypothetical protein (1)                                          | -                                                                                                                                                                                                                                                                                                                  | -                                                                                                                                                                                                                                                                                   | -                         | C_ushii_01033_mRNA_3.1  | -                       |
| GF0039804 | 0                      | 1                  | 1                    | Hypothetical protein (1)                                          | -                                                                                                                                                                                                                                                                                                                  | -                                                                                                                                                                                                                                                                                   | -                         | C_ushii_01033_mRNA_2.1  | -                       |
| GF0039803 | 0                      | 1                  | 1                    | Hypothetical protein (1)                                          | -                                                                                                                                                                                                                                                                                                                  | -                                                                                                                                                                                                                                                                                   | -                         | C_ushii_01032_mRNA_9.1  | -                       |
| GF0039802 | 0                      | 1                  | 1                    | Hypothetical protein (1)                                          | response to oxidative stress [GO:0006979 biological_process] (1); heme binding [GO:0020037 molecular_function] (1); oxidation-reduction process [GO:0055114 biological_process] (1); peroxidase activity [GO:0004601 molecular_function] (1)                                                                       | Haem peroxidase [IPRO10255] (1); Haem peroxidase, plant/fungal/bacterial [IPRO2010] (1); Peroxidase, active site [IPRO17948] (1); Plant peroxidase [IPRO08821] (1)                                                                                                                  | -                         | C_ushii_01032_mRNA_2.1  | -                       |
| GF0039801 | 0                      | 1                  | 1                    | Hypothetical protein (1)                                          | oxidation-reduction process [GO:0055114 biological_process] (1); peroxidase activity [GO:0004601 molecular_function] (1); response to oxidative stress [GO:0006979 biological_process] (1); heme binding [GO:0020037 molecular_function] (1)                                                                       | Haem peroxidase, plant/fungal/bacterial [IPRO2010] (1); Plant peroxidase [IPRO08821] (1); Peroxidase heme ligand binding site [IPRO19793] (1); biological process [GO:0008152 biological_process] (1); Haem peroxidase [IPRO10255] (1)                                              | -                         | C_ushii_01032_mRNA_1.1  | -                       |
| GF0039800 | 0                      | 1                  | 1                    | Hypothetical protein (1)                                          | -                                                                                                                                                                                                                                                                                                                  | -                                                                                                                                                                                                                                                                                   | -                         | C_ushii_01031_mRNA_5.1  | -                       |
| GF0039799 | 0                      | 1                  | 1                    | Hypothetical protein (1)                                          | -                                                                                                                                                                                                                                                                                                                  | -                                                                                                                                                                                                                                                                                   | -                         | C_ushii_01030_mRNA_7.1  | -                       |
| GF0039798 | 0                      | 1                  | 1                    | Hypothetical protein (1)                                          | -                                                                                                                                                                                                                                                                                                                  | -                                                                                                                                                                                                                                                                                   | -                         | C_ushii_01029_mRNA_15.1 | -                       |
| GF0039797 | 0                      | 1                  | 1                    | Hypothetical protein (1)                                          | -                                                                                                                                                                                                                                                                                                                  | -                                                                                                                                                                                                                                                                                   | -                         | C_ushii_01029_mRNA_11.1 | -                       |
| GF0039796 | 0                      | 1                  | 1                    | Hypothetical protein (1)                                          | -                                                                                                                                                                                                                                                                                                                  | -                                                                                                                                                                                                                                                                                   | -                         | C_ushii_01029_mRNA_9.1  | -                       |
| GF0039795 | 0                      | 1                  | 1                    | Hypothetical protein (1)                                          | -                                                                                                                                                                                                                                                                                                                  | -                                                                                                                                                                                                                                                                                   | -                         | C_ushii_01029_mRNA_6.1  | -                       |
| GF0039794 | 0                      | 1                  | 1                    | Hypothetical protein (1)                                          | -                                                                                                                                                                                                                                                                                                                  | -                                                                                                                                                                                                                                                                                   | -                         | C_ushii_01029_mRNA_5.1  | -                       |
| GF0039793 | 0                      | 1                  | 1                    | Hypothetical protein (1)                                          | proteolysis [GO:0006508 biological_process] (1); aspartic-type endopeptidase activity [GO:0004190 molecular_function] (1)                                                                                                                                                                                          | Peptidase A2A, retrovirus, catalytic [IPRO19951] (1)                                                                                                                                                                                                                                | -                         | C_ushii_01029_mRNA_3.1  | -                       |
| GF0039792 | 0                      | 1                  | 1                    | Hypothetical protein (1)                                          | -                                                                                                                                                                                                                                                                                                                  | -                                                                                                                                                                                                                                                                                   | -                         | C_ushii_01029_mRNA_2.1  | -                       |
| GF0039791 | 0                      | 1                  | 1                    | Hypothetical protein (1)                                          | -                                                                                                                                                                                                                                                                                                                  | -                                                                                                                                                                                                                                                                                   | -                         | C_ushii_01029_mRNA_15.1 | -                       |
| GF0039790 | 0                      | 1                  | 1                    | Hypothetical protein (1)                                          | -                                                                                                                                                                                                                                                                                                                  | Reverse transcriptase domain [IPRO04771] (1)                                                                                                                                                                                                                                        | -                         | C_ushii_01029_mRNA_12.1 | -                       |
| GF0039789 | 0                      | 1                  | 1                    | Hypothetical protein (1)                                          | -                                                                                                                                                                                                                                                                                                                  | -                                                                                                                                                                                                                                                                                   | -                         | C_ushii_01029_mRNA_11.1 | -                       |
| GF0039788 | 0                      | 1                  | 1                    | Hypothetical protein (1)                                          | -                                                                                                                                                                                                                                                                                                                  | -                                                                                                                                                                                                                                                                                   | -                         | C_ushii_01029_mRNA_10.1 | -                       |
| GF0039787 | 0                      | 1                  | 1                    | Hypothetical protein (1)                                          | -                                                                                                                                                                                                                                                                                                                  | -                                                                                                                                                                                                                                                                                   | -                         | C_ushii_01028_mRNA_9.1  | -                       |
| GF0039786 | 0                      | 1                  | 1                    | Hypothetical protein (1)                                          | -                                                                                                                                                                                                                                                                                                                  | -                                                                                                                                                                                                                                                                                   | -                         | C_ushii_01028_mRNA_11.1 | -                       |
| GF0039785 | 0                      | 1                  | 1                    | Hypothetical protein (1)                                          | -                                                                                                                                                                                                                                                                                                                  | -                                                                                                                                                                                                                                                                                   | -                         | C_ushii_01028_mRNA_10.1 | -                       |
| GF0039784 | 0                      | 1                  | 1                    | Hypothetical protein (1)                                          | -                                                                                                                                                                                                                                                                                                                  | -                                                                                                                                                                                                                                                                                   | -                         | C_ushii_01027_mRNA_10.1 | -                       |
| GF0039783 | 0                      | 1                  | 1                    | Hypothetical protein (1)                                          | -                                                                                                                                                                                                                                                                                                                  | -                                                                                                                                                                                                                                                                                   | -                         | C_ushii_01026_mRNA_7.1  | -                       |
| GF0039782 | 0                      | 1                  | 1                    | UDP-glycosyltransferase 73C7 (1)                                  | metabolic process [GO:0008152 biological_process] (1); transferase activity, transferring hexosyl groups [GO:0016758 molecular_function] (1)                                                                                                                                                                       | UDP-glucuronosyl/UDP-glycosyltransferase [IPRO02213] (1)                                                                                                                                                                                                                            | -                         | C_ushii_01026_mRNA_3.1  | -                       |
| GF0039781 | 0                      | 1                  | 1                    | Hypothetical protein (1)                                          | nucleic acid binding [GO:0003676 molecular_function] (1); zinc ion binding [GO:0008270 molecular_function] (1)                                                                                                                                                                                                     | Zinc finger, CCHC-type [IPRO01878] (1)                                                                                                                                                                                                                                              | -                         | C_ushii_01026_mRNA_2.1  | -                       |
| GF0039780 | 0                      | 1                  | 1                    | Cytokinin riboside 5'-monophosphate phosphoribosyltransferase (1) | protein dimerization activity [GO:0046983 molecular_function] (1); nucleic acid binding [GO:0003676 molecular_function] (1)                                                                                                                                                                                        | LOG family [IPRO31100] (1)                                                                                                                                                                                                                                                          | -                         | C_ushii_01026_mRNA_1.1  | -                       |
| GF0039779 | 0                      | 1                  | 1                    | Hypothetical protein (1)                                          | nucleic acid binding [GO:0003676 molecular_function] (1)                                                                                                                                                                                                                                                           | Ribonuclease H-like domain [IPRO12337] (1); HAT, C-terminal dimerization domain [IPRO09060] (1)                                                                                                                                                                                     | -                         | C_ushii_01025_mRNA_6.1  | -                       |
| GF0039778 | 0                      | 1                  | 1                    | HAT family dimerization domain containing protein (1)             | nucleic acid binding [GO:0003676 molecular_function] (1); DNA binding [GO:0003677 molecular_function] (1)                                                                                                                                                                                                          | Zinc finger, BED-type [IPRO03656] (1); HAT-like transposase, RNase-H fold [IPRO25252] (1); Ribonuclease H-like domain [IPRO12337] (1)                                                                                                                                               | -                         | C_ushii_01025_mRNA_5.1  | -                       |
| GF0039777 | 0                      | 1                  | 1                    | Hypothetical protein (1)                                          | -                                                                                                                                                                                                                                                                                                                  | -                                                                                                                                                                                                                                                                                   | -                         | C_ushii_01025_mRNA_3.1  | -                       |
| GF0039776 | 0                      | 1                  | 1                    | Hypothetical protein (1)                                          | -                                                                                                                                                                                                                                                                                                                  | -                                                                                                                                                                                                                                                                                   | -                         | C_ushii_01025_mRNA_2.1  | -                       |
| GF0039775 | 0                      | 1                  | 1                    | AP2-like ethylene-responsive transcription factor BEM2 (1)        | DNA binding [GO:0009677 molecular_function] (1); multicellular organismal development [GO:0007215 biological_process] (1); regulation of transcription, DNA-templated [GO:0006355 biological_process] (1); transcription factor activity, sequence-specific DNA binding [GO:0003700 molecular_function] (1)        | AP2-like ethylene-responsive transcription factor [IPRO61112] (1); AP2/ERF domain [IPRO01471] (1); DNA-binding domain [IPRO10171] (1)                                                                                                                                               | -                         | C_ushii_01025_mRNA_14.1 | -                       |
| GF0039774 | 0                      | 1                  | 1                    | Hypothetical protein (1)                                          | -                                                                                                                                                                                                                                                                                                                  | -                                                                                                                                                                                                                                                                                   | -                         | C_ushii_01024_mRNA_9.1  | -                       |
| GF0039773 | 0                      | 1                  | 1                    | Hypothetical protein (1)                                          | -                                                                                                                                                                                                                                                                                                                  | -                                                                                                                                                                                                                                                                                   | -                         | C_ushii_01024_mRNA_8.1  | -                       |
| GF0039772 | 0                      | 1                  | 1                    | Hypothetical protein (1)                                          | -                                                                                                                                                                                                                                                                                                                  | -                                                                                                                                                                                                                                                                                   | -                         | C_ushii_01024_mRNA_7.1  | -                       |
| GF0039771 | 0                      | 1                  | 1                    | Hypothetical protein (1)                                          | -                                                                                                                                                                                                                                                                                                                  | -                                                                                                                                                                                                                                                                                   | -                         | C_ushii_01024_mRNA_5.1  | -                       |
| GF0039770 | 0                      | 1                  | 1                    | Hypothetical protein (1)                                          | -                                                                                                                                                                                                                                                                                                                  | -                                                                                                                                                                                                                                                                                   | -                         | C_ushii_01024_mRNA_3.1  | -                       |
| GF0039769 | 0                      | 1                  | 1                    | Hypothetical protein (1)                                          | -                                                                                                                                                                                                                                                                                                                  | -                                                                                                                                                                                                                                                                                   | -                         | C_ushii_01024_mRNA_2.1  | -                       |
| GF0039768 | 0                      | 1                  | 1                    | Hypothetical protein (1)                                          | -                                                                                                                                                                                                                                                                                                                  | -                                                                                                                                                                                                                                                                                   | -                         | C_ushii_01024_mRNA_18.1 | -                       |
| GF0039767 | 0                      | 1                  | 1                    | Hypothetical protein (1)                                          | -                                                                                                                                                                                                                                                                                                                  | -                                                                                                                                                                                                                                                                                   | -                         | C_ushii_01024_mRNA_17.1 | -                       |
| GF0039766 | 0                      | 1                  | 1                    | Hypothetical protein (1)                                          | -                                                                                                                                                                                                                                                                                                                  | -                                                                                                                                                                                                                                                                                   | -                         | C_ushii_01024_mRNA_1.1  | -                       |
| GF0039765 | 0                      | 1                  | 1                    | Hypothetical protein (1)                                          | -                                                                                                                                                                                                                                                                                                                  | -                                                                                                                                                                                                                                                                                   | -                         | C_ushii_01023_mRNA_8.1  | -                       |
| GF0039764 | 0                      | 1                  | 1                    | Hypothetical protein (1)                                          | -                                                                                                                                                                                                                                                                                                                  | Domain of unknown function DUF4218 [IPRO25423] (1); Transposon, EriSpm-like [IPRO04242] (1)                                                                                                                                                                                         | -                         | C_ushii_01022_mRNA_14.1 | -                       |
| GF0039763 | 0                      | 1                  | 1                    | Hypothetical protein (1)                                          | -                                                                                                                                                                                                                                                                                                                  | -                                                                                                                                                                                                                                                                                   | -                         | C_ushii_01022_mRNA_13.1 | -                       |
| GF0039762 | 0                      | 1                  | 1                    | Hypothetical protein (1)                                          | -                                                                                                                                                                                                                                                                                                                  | LOG family [IPRO31100] (1)                                                                                                                                                                                                                                                          | -                         | C_ushii_01022_mRNA_12.1 | -                       |
| GF0039761 | 0                      | 1                  | 1                    | Hypothetical protein (1)                                          | -                                                                                                                                                                                                                                                                                                                  | -                                                                                                                                                                                                                                                                                   | -                         | C_ushii_01021_mRNA_5.1  | -                       |
| GF0039760 | 0                      | 1                  | 1                    | Cytokinin riboside 5'-monophosphate phosphoribosyltransferase (1) | -                                                                                                                                                                                                                                                                                                                  | -                                                                                                                                                                                                                                                                                   | -                         | C_ushii_01021_mRNA_4.1  | -                       |
| GF0039759 | 0                      | 1                  | 1                    | Hypothetical protein (1)                                          | -                                                                                                                                                                                                                                                                                                                  | -                                                                                                                                                                                                                                                                                   | -                         | C_ushii_01020_mRNA_7.1  | -                       |
| GF0039758 | 0                      | 1                  | 1                    | Hypothetical protein (1)                                          | -                                                                                                                                                                                                                                                                                                                  | -                                                                                                                                                                                                                                                                                   | -                         | C_ushii_01020_mRNA_4.1  | -                       |
| GF0039757 | 0                      | 1                  | 1                    | Hypothetical protein (1)                                          | -                                                                                                                                                                                                                                                                                                                  | -                                                                                                                                                                                                                                                                                   | -                         | C_ushii_01019_mRNA_6.1  | -                       |
| GF0039756 | 0                      | 1                  | 1                    | Hypothetical protein (1)                                          | -                                                                                                                                                                                                                                                                                                                  | -                                                                                                                                                                                                                                                                                   | -                         | C_ushii_01019_mRNA_5.1  | -                       |
| GF0039755 | 0                      | 1                  | 1                    | Hypothetical protein (1)                                          | -                                                                                                                                                                                                                                                                                                                  | -                                                                                                                                                                                                                                                                                   | -                         | C_ushii_01019_mRNA_2.1  | -                       |
| GF0039754 | 0                      | 1                  | 1                    | Hypothetical protein (1)                                          | -                                                                                                                                                                                                                                                                                                                  | -                                                                                                                                                                                                                                                                                   | -                         | C_ushii_01019_mRNA_14.1 | -                       |
| GF0039753 | 0                      | 1                  | 1                    | Hypothetical protein (1)                                          | -                                                                                                                                                                                                                                                                                                                  | -                                                                                                                                                                                                                                                                                   | -                         | C_ushii_01019_mRNA_13.1 | -                       |
| GF0039752 | 0                      | 1                  | 1                    | Hypothetical protein (1)                                          | -                                                                                                                                                                                                                                                                                                                  | -                                                                                                                                                                                                                                                                                   | -                         | C_ushii_01019_mRNA_12.1 | -                       |
| GF0039751 | 0                      | 1                  | 1                    | Hypothetical protein (1)                                          | -                                                                                                                                                                                                                                                                                                                  | Chromo domain-like [IPRO16197] (1); Chromo domain [IPRO23780] (1)                                                                                                                                                                                                                   | -                         | C_ushii_01019_mRNA_11.1 | -                       |
| GF0039750 | 0                      | 1                  | 1                    | Hypothetical protein (1)                                          | -                                                                                                                                                                                                                                                                                                                  | -                                                                                                                                                                                                                                                                                   | -                         | C_ushii_01019_mRNA_1.1  | -                       |
| GF0039749 | 0                      | 1                  | 1                    | Hypothetical protein (1)                                          | -                                                                                                                                                                                                                                                                                                                  | -                                                                                                                                                                                                                                                                                   | -                         | C_ushii_01018_mRNA_9.1  | -                       |
| GF0039748 | 0                      | 1                  | 1                    | Hypothetical protein (1)                                          | -                                                                                                                                                                                                                                                                                                                  | -                                                                                                                                                                                                                                                                                   | -                         | C_ushii_01018_mRNA_10.1 | -                       |
| GF0039747 | 0                      | 1                  | 1                    | Polymethyltransferase, Ribonuclease H 646 (1)                     | nucleic acid binding [GO:0003676 molecular_function] (1)                                                                                                                                                                                                                                                           | Reverse transcriptase zinc-binding domain [IPRO26960] (1); Ribonuclease H-like domain [IPRO12337] (1)                                                                                                                                                                               | -                         | C_ushii_01018_mRNA_1.1  | -                       |
| GF0039746 | 0                      | 1                  | 1                    | Hypothetical protein (1)                                          | -                                                                                                                                                                                                                                                                                                                  | -                                                                                                                                                                                                                                                                                   | -                         | C_ushii_01017_mRNA_7.1  | -                       |

| ID        | Num. in C. crottenstei | Num. in C. auris | Num. in P. putida | Note                                                              | GO                                                                                                                                                                                                                                                                                                                                                                                                                                                                     | InterPro                                                                                                                                                                                                                                                                                                                                                                                                                                                                                                                                                                                  | Members in C. crottenstei | Members in C. auris     | Members in P. putida |
|-----------|------------------------|------------------|-------------------|-------------------------------------------------------------------|------------------------------------------------------------------------------------------------------------------------------------------------------------------------------------------------------------------------------------------------------------------------------------------------------------------------------------------------------------------------------------------------------------------------------------------------------------------------|-------------------------------------------------------------------------------------------------------------------------------------------------------------------------------------------------------------------------------------------------------------------------------------------------------------------------------------------------------------------------------------------------------------------------------------------------------------------------------------------------------------------------------------------------------------------------------------------|---------------------------|-------------------------|----------------------|
| GF0039745 | 0                      | 1                | 0                 | Hypothetical protein (1)                                          | DNA integration [GO:0015674 biological process] (1); nucleic acid binding [GO:0003676 molecular_function] (1)                                                                                                                                                                                                                                                                                                                                                          | Integrase, catalytic core [IPRO1184] (1); Ribonuclease H-like domain [IPRO12337] (1)                                                                                                                                                                                                                                                                                                                                                                                                                                                                                                      | -                         | C_uni96_01017_mRNA_2,1  | -                    |
| GF0039744 | 0                      | 1                | 0                 | Hypothetical protein (1)                                          | -                                                                                                                                                                                                                                                                                                                                                                                                                                                                      | Viral movement protein [IPRO28919] (1)                                                                                                                                                                                                                                                                                                                                                                                                                                                                                                                                                    | -                         | C_uni96_01017_mRNA_13,3 | -                    |
| GF0039743 | 0                      | 1                | 0                 | Hypothetical protein (1)                                          | -                                                                                                                                                                                                                                                                                                                                                                                                                                                                      | -                                                                                                                                                                                                                                                                                                                                                                                                                                                                                                                                                                                         | -                         | C_uni96_01017_mRNA_12,1 | -                    |
| GF0039742 | 0                      | 1                | 0                 | Hypothetical protein (1)                                          | -                                                                                                                                                                                                                                                                                                                                                                                                                                                                      | -                                                                                                                                                                                                                                                                                                                                                                                                                                                                                                                                                                                         | -                         | C_uni96_01017_mRNA_11,1 | -                    |
| GF0039741 | 0                      | 1                | 0                 | Hypothetical protein (1)                                          | -                                                                                                                                                                                                                                                                                                                                                                                                                                                                      | -                                                                                                                                                                                                                                                                                                                                                                                                                                                                                                                                                                                         | -                         | C_uni96_01017_mRNA_10,1 | -                    |
| GF0039740 | 0                      | 1                | 0                 | Hypothetical protein (1)                                          | -                                                                                                                                                                                                                                                                                                                                                                                                                                                                      | -                                                                                                                                                                                                                                                                                                                                                                                                                                                                                                                                                                                         | -                         | C_uni96_01017_mRNA_1,1  | -                    |
| GF0039739 | 0                      | 1                | 0                 | Hypothetical protein (1)                                          | transcription, DNA-templated [GO:006351 biological_process] (1); DNA-directed RNA polymerase activity [GO:0003899 molecular_function] (1); DNA binding [GO:0003677 molecular_function] (1)                                                                                                                                                                                                                                                                             | RNA polymerase, alpha subunit, C-terminal [IPRO11260] (1)                                                                                                                                                                                                                                                                                                                                                                                                                                                                                                                                 | -                         | C_uni96_01016_mRNA_7,1  | -                    |
| GF0039738 | 0                      | 1                | 0                 | DNA-directed RNA polymerase, alpha subunit (1)                    | transcription, DNA-templated [GO:006351 biological_process] (1); DNA-directed RNA polymerase activity [GO:0003899 molecular_function] (1); protein dimerization activity [GO:0046983 molecular_function] (1); ribosome [GO:0005540 cellular_component] (1); translation [GO:0006412 biological_process] (1); intracellular [GO:0005622 cellular_component] (1); structural constituent of ribosome [GO:0003735 molecular_function] (1)                                 | DNA-directed RNA polymerase, RBP11-like dimerization domain [IPRO09025] (1); DNA-directed RNA polymerase, insert domain [IPRO11262] (1); DNA-directed RNA polymerase, RpoA/D/RpoB-type [IPRO11263] (1)                                                                                                                                                                                                                                                                                                                                                                                    | -                         | C_uni96_01016_mRNA_4,1  | -                    |
| GF0039737 | 0                      | 1                | 0                 | 30S ribosomal protein S11, chloroplast (1)                        | transcription, DNA-templated [GO:006351 biological_process] (1); intracellular [GO:0005622 cellular_component] (1); structural constituent of ribosome [GO:0003735 molecular_function] (1)                                                                                                                                                                                                                                                                             | Ribosomal S11, conserved site [IPRO18102] (1); Ribosomal protein S11 [IPRO19171] (1); Ribosomal protein S11, bacterial-type [IPRO19981] (1)                                                                                                                                                                                                                                                                                                                                                                                                                                               | -                         | C_uni96_01016_mRNA_3,1  | -                    |
| GF0039736 | 0                      | 1                | 0                 | DNA-directed RNA polymerase, alpha subunit (1)                    | transcription, DNA-templated [GO:006351 biological_process] (1); protein dimerization activity [GO:0046983 molecular_function] (1); DNA-directed RNA polymerase activity [GO:0003899 molecular_function] (1)                                                                                                                                                                                                                                                           | DNA-directed RNA polymerase, RBP11-like dimerization domain [IPRO09025] (1); DNA-directed RNA polymerase, RpoA/D/RpoB-type [IPRO11263] (1); DNA-directed RNA polymerase, insert domain [IPRO11262] (1)                                                                                                                                                                                                                                                                                                                                                                                    | -                         | C_uni96_01016_mRNA_2,1  | -                    |
| GF0039735 | 0                      | 1                | 0                 | Hypothetical protein (1)                                          | -                                                                                                                                                                                                                                                                                                                                                                                                                                                                      | Heat shock protein 70kD, peptide-binding domain [IPRO29047] (1); Heat shock protein 70 family [IPRO13126] (1); Heat shock protein 70 conserved site [IPRO18181] (1); Heat shock protein 70kD, C-terminal domain [IPRO29048] (1)                                                                                                                                                                                                                                                                                                                                                           | -                         | C_uni96_01015_mRNA_9,1  | -                    |
| GF0039734 | 0                      | 1                | 0                 | Heat shock protein 70 (1)                                         | -                                                                                                                                                                                                                                                                                                                                                                                                                                                                      | -                                                                                                                                                                                                                                                                                                                                                                                                                                                                                                                                                                                         | -                         | C_uni96_01015_mRNA_8,1  | -                    |
| GF0039733 | 0                      | 1                | 0                 | Hypothetical protein (1)                                          | -                                                                                                                                                                                                                                                                                                                                                                                                                                                                      | -                                                                                                                                                                                                                                                                                                                                                                                                                                                                                                                                                                                         | -                         | C_uni96_01015_mRNA_7,1  | -                    |
| GF0039732 | 0                      | 1                | 0                 | Probable retrocorker pol polyprotein, putative (1)                | -                                                                                                                                                                                                                                                                                                                                                                                                                                                                      | -                                                                                                                                                                                                                                                                                                                                                                                                                                                                                                                                                                                         | -                         | C_uni96_01015_mRNA_6,1  | -                    |
| GF0039731 | 0                      | 1                | 0                 | Hypothetical protein (1)                                          | iron ion binding [GO:0005506 molecular_function] (1); heme binding [GO:0020037 molecular_function] (1); oxidation-reduction process [GO:0005514 biological_process] (1); oxidoreductase activity, acting on paired donors, with incorporation or reduction of molecular oxygen [GO:0016785 molecular_function] (1)                                                                                                                                                     | Cytochrome P450, E-class, group I [IPRO02401] (1); Cytochrome P450 [IPRO01128] (1)                                                                                                                                                                                                                                                                                                                                                                                                                                                                                                        | -                         | C_uni96_01015_mRNA_5,1  | -                    |
| GF0039730 | 0                      | 1                | 0                 | Hypothetical protein (1)                                          | -                                                                                                                                                                                                                                                                                                                                                                                                                                                                      | Pentapeptide repeat [IPRO02885] (1)                                                                                                                                                                                                                                                                                                                                                                                                                                                                                                                                                       | -                         | C_uni96_01015_mRNA_2,1  | -                    |
| GF0039729 | 0                      | 1                | 0                 | Hypothetical protein (1)                                          | -                                                                                                                                                                                                                                                                                                                                                                                                                                                                      | Archdiopsis retrotransposon Orf1 [IPRO04321] (1)                                                                                                                                                                                                                                                                                                                                                                                                                                                                                                                                          | -                         | C_uni96_01015_mRNA_10,1 | -                    |
| GF0039728 | 0                      | 1                | 0                 | LRR receptor-like kinase family protein (1)                       | protein binding [GO:0005515 molecular_function] (1)                                                                                                                                                                                                                                                                                                                                                                                                                    | Retrotransposon gag domain [IPRO05162] (1); Leucine-rich repeat domain [IPRO10111] (1); Protein kinase-like domain [IPRO11009] (1); Leucine-rich repeat domain, L domain-like [IPRO02975] (1); Leucine-rich repeat, typical subtype [IPRO03591] (1)                                                                                                                                                                                                                                                                                                                                       | -                         | C_uni96_01015_mRNA_1,1  | -                    |
| GF0039727 | 0                      | 1                | 0                 | Hypothetical protein (1)                                          | -                                                                                                                                                                                                                                                                                                                                                                                                                                                                      | Thioredoxin-like fold [IPRO12356] (1)                                                                                                                                                                                                                                                                                                                                                                                                                                                                                                                                                     | -                         | C_uni96_01014_mRNA_8,1  | -                    |
| GF0039726 | 0                      | 1                | 0                 | Hypothetical protein (1)                                          | -                                                                                                                                                                                                                                                                                                                                                                                                                                                                      | -                                                                                                                                                                                                                                                                                                                                                                                                                                                                                                                                                                                         | -                         | C_uni96_01014_mRNA_2,1  | -                    |
| GF0039725 | 0                      | 1                | 0                 | Hypothetical protein (1)                                          | zinc ion binding [GO:0008270 molecular_function] (1); nucleic acid binding [GO:0003676 molecular_function] (1)                                                                                                                                                                                                                                                                                                                                                         | Zinc finger, CCHC-type [IPRO1878] (1); Domain of unknown function DUF1985 [IPRO15410] (1)                                                                                                                                                                                                                                                                                                                                                                                                                                                                                                 | -                         | C_uni96_01014_mRNA_14,1 | -                    |
| GF0039724 | 0                      | 1                | 0                 | Hypothetical protein (1)                                          | -                                                                                                                                                                                                                                                                                                                                                                                                                                                                      | -                                                                                                                                                                                                                                                                                                                                                                                                                                                                                                                                                                                         | -                         | C_uni96_01014_mRNA_1,1  | -                    |
| GF0039723 | 0                      | 1                | 0                 | Hypothetical protein (1)                                          | -                                                                                                                                                                                                                                                                                                                                                                                                                                                                      | -                                                                                                                                                                                                                                                                                                                                                                                                                                                                                                                                                                                         | -                         | C_uni96_01013_mRNA_8,1  | -                    |
| GF0039722 | 0                      | 1                | 0                 | Hypothetical protein (1)                                          | -                                                                                                                                                                                                                                                                                                                                                                                                                                                                      | NAD(P) <sup>+</sup> binding domain [IPRO11604] (1); NsrA-like domain [IPRO08030] (1)                                                                                                                                                                                                                                                                                                                                                                                                                                                                                                      | -                         | C_uni96_01013_mRNA_4,1  | -                    |
| GF0039721 | 0                      | 1                | 0                 | 60S ribosomal protein L14 (1)                                     | ribosome [GO:0005540 cellular_component] (1); translation [GO:0006412 biological_process] (1); intracellular [GO:0005622 cellular_component] (1); structural constituent of ribosome [GO:0003735 molecular_function] (1)                                                                                                                                                                                                                                               | Ribosomal protein L2 domain 2 [IPRO14722] (1); Ribosomal protein L14 [IPRO02784] (1); Translational protein SH3-like domain [IPRO08991] (1)                                                                                                                                                                                                                                                                                                                                                                                                                                               | -                         | C_uni96_01013_mRNA_3,1  | -                    |
| GF0039720 | 0                      | 1                | 0                 | Hypothetical protein (1)                                          | -                                                                                                                                                                                                                                                                                                                                                                                                                                                                      | -                                                                                                                                                                                                                                                                                                                                                                                                                                                                                                                                                                                         | -                         | C_uni96_01013_mRNA_11,1 | -                    |
| GF0039719 | 0                      | 1                | 0                 | Hypothetical protein (1)                                          | -                                                                                                                                                                                                                                                                                                                                                                                                                                                                      | -                                                                                                                                                                                                                                                                                                                                                                                                                                                                                                                                                                                         | -                         | C_uni96_01010_mRNA_9,1  | -                    |
| GF0039718 | 0                      | 1                | 0                 | Hypothetical protein (1)                                          | -                                                                                                                                                                                                                                                                                                                                                                                                                                                                      | -                                                                                                                                                                                                                                                                                                                                                                                                                                                                                                                                                                                         | -                         | C_uni96_01010_mRNA_8,1  | -                    |
| GF0039717 | 0                      | 1                | 0                 | Hypothetical protein (1)                                          | -                                                                                                                                                                                                                                                                                                                                                                                                                                                                      | -                                                                                                                                                                                                                                                                                                                                                                                                                                                                                                                                                                                         | -                         | C_uni96_01010_mRNA_7,1  | -                    |
| GF0039716 | 0                      | 1                | 0                 | Hypothetical protein (1)                                          | -                                                                                                                                                                                                                                                                                                                                                                                                                                                                      | -                                                                                                                                                                                                                                                                                                                                                                                                                                                                                                                                                                                         | -                         | C_uni96_01010_mRNA_6,1  | -                    |
| GF0039715 | 0                      | 1                | 0                 | Hypothetical protein (1)                                          | -                                                                                                                                                                                                                                                                                                                                                                                                                                                                      | -                                                                                                                                                                                                                                                                                                                                                                                                                                                                                                                                                                                         | -                         | C_uni96_01010_mRNA_5,1  | -                    |
| GF0039714 | 0                      | 1                | 0                 | Hypothetical protein (1)                                          | -                                                                                                                                                                                                                                                                                                                                                                                                                                                                      | -                                                                                                                                                                                                                                                                                                                                                                                                                                                                                                                                                                                         | -                         | C_uni96_01010_mRNA_4,1  | -                    |
| GF0039713 | 0                      | 1                | 0                 | Hypothetical protein (1)                                          | -                                                                                                                                                                                                                                                                                                                                                                                                                                                                      | -                                                                                                                                                                                                                                                                                                                                                                                                                                                                                                                                                                                         | -                         | C_uni96_01010_mRNA_3,1  | -                    |
| GF0039712 | 0                      | 1                | 0                 | Hypothetical protein (1)                                          | -                                                                                                                                                                                                                                                                                                                                                                                                                                                                      | -                                                                                                                                                                                                                                                                                                                                                                                                                                                                                                                                                                                         | -                         | C_uni96_01010_mRNA_2,1  | -                    |
| GF0039711 | 0                      | 1                | 0                 | Hypothetical protein (1)                                          | secondary active sulfate transmembrane transporter activity [GO:0008271 molecular_function] (1); sulfate transport [GO:0008272 biological_process] (1); integral component of membrane [GO:0016021 cellular_component] (1); membrane [GO:0016020 cellular_component] (1); sulfate transmembrane transporter activity [GO:0015116 molecular_function] (1); transmembrane transport [GO:0055085 biological_process] (1); chloroplast [GO:0009507 cellular_component] (1) | STAS domain [IPRO02645] (1); Sulphate anion transporter, conserved site [IPRO18045] (1); SL26A/SuP transporter domain [IPRO11547] (1); Harburger transposase-derived nuclease domain [IPRO07800] (1); Sulfate transporter 3.1/3.2 [IPRO3031] (1); SL26A/SuP transporter [IPRO01902] (1)                                                                                                                                                                                                                                                                                                   | -                         | C_uni96_01010_mRNA_11,1 | -                    |
| GF0039710 | 0                      | 1                | 0                 | Hypothetical protein (1)                                          | -                                                                                                                                                                                                                                                                                                                                                                                                                                                                      | -                                                                                                                                                                                                                                                                                                                                                                                                                                                                                                                                                                                         | -                         | C_uni96_01010_mRNA_10,1 | -                    |
| GF0039709 | 0                      | 1                | 0                 | Nematode resistance-like protein (1)                              | signal transduction [GO:0007165 biological_process] (1); ATP binding [GO:0043531 molecular_function] (1); GTP binding [GO:0005525 molecular_function] (1); protein binding [GO:0005215 molecular_function] (1); GTPase activity [GO:0003924 molecular_function] (1)                                                                                                                                                                                                    | Toll/interleukin-1 receptor homology (TR) domain [IPRO01571] (1); Dynamitin GTPase effector [IPRO01101] (1); Leucine-rich repeat, typical subtype [IPRO05911] (1); Leucine-rich repeat domain, L domain-like [IPRO02975] (1); Winged helix-turn-helix DNA-binding domain [IPRO11991] (1); PH domain-like [IPRO11991] (1); P-loop containing nucleoside triphosphate hydrolase [IPRO27417] (1); GTPase effector domain [IPRO20850] (1); Leucine-rich repeat [IPRO10111] (1); Pleckstrin homology domain [IPRO01489] (1); Drosophila central domain [IPRO00375] (1); NB-ARC [IPRO02182] (1) | -                         | C_uni96_01010_mRNA_1,1  | -                    |
| GF0039708 | 0                      | 1                | 0                 | Orotate phosphoribosyltransferase, putative (1)                   | nucleoside metabolic process [GO:0009116 biological_process] (1); orotate phosphoribosyltransferase activity [GO:0004888 molecular_function] (1); pyrimidine nucleoside biosynthetic process [GO:0006221 biological_process] (1)                                                                                                                                                                                                                                       | Orotate phosphoribosyltransferase transference domain [IPRO04467] (1); Phosphoribosyltransferase domain [IPRO00836] (1); Phosphoribosyltransferase-like [IPRO09071] (1)                                                                                                                                                                                                                                                                                                                                                                                                                   | -                         | C_uni96_01009_mRNA_8,1  | -                    |
| GF0039707 | 0                      | 1                | 0                 | Hypothetical protein (1)                                          | -                                                                                                                                                                                                                                                                                                                                                                                                                                                                      | Retrotransposon gag domain [IPRO05162] (1)                                                                                                                                                                                                                                                                                                                                                                                                                                                                                                                                                | -                         | C_uni96_01009_mRNA_5,1  | -                    |
| GF0039706 | 0                      | 1                | 0                 | Hypothetical protein (1)                                          | -                                                                                                                                                                                                                                                                                                                                                                                                                                                                      | -                                                                                                                                                                                                                                                                                                                                                                                                                                                                                                                                                                                         | -                         | C_uni96_01009_mRNA_10,1 | -                    |
| GF0039705 | 0                      | 1                | 0                 | Hypothetical protein (1)                                          | -                                                                                                                                                                                                                                                                                                                                                                                                                                                                      | -                                                                                                                                                                                                                                                                                                                                                                                                                                                                                                                                                                                         | -                         | C_uni96_01007_mRNA_9,1  | -                    |
| GF0039704 | 0                      | 1                | 0                 | Hypothetical protein (1)                                          | -                                                                                                                                                                                                                                                                                                                                                                                                                                                                      | -                                                                                                                                                                                                                                                                                                                                                                                                                                                                                                                                                                                         | -                         | C_uni96_01007_mRNA_8,1  | -                    |
| GF0039703 | 0                      | 1                | 0                 | BURP domain-containing protein (1)                                | -                                                                                                                                                                                                                                                                                                                                                                                                                                                                      | BURP domain [IPRO04873] (1)                                                                                                                                                                                                                                                                                                                                                                                                                                                                                                                                                               | -                         | C_uni96_01007_mRNA_6,1  | -                    |
| GF0039702 | 0                      | 1                | 0                 | BURP domain-containing protein (1)                                | -                                                                                                                                                                                                                                                                                                                                                                                                                                                                      | BURP domain [IPRO04873] (1)                                                                                                                                                                                                                                                                                                                                                                                                                                                                                                                                                               | -                         | C_uni96_01007_mRNA_2,1  | -                    |
| GF0039701 | 0                      | 1                | 0                 | Hypothetical protein (1)                                          | oxidoreductase activity [GO:0016491 molecular_function] (1); oxidation-reduction process [GO:0005514 biological_process] (1); zinc ion binding [GO:0008270 molecular_function] (1)                                                                                                                                                                                                                                                                                     | NAD(P) <sup>+</sup> binding domain [IPRO11604] (1); GroES-like [IPRO11032] (1); Protein of unknown function DUF377 [IPRO07749] (1); Alcohol dehydrogenase, N-terminal [IPRO13154] (1); Alcohol dehydrogenase, zinc-type, conserved site [IPRO02328] (1)                                                                                                                                                                                                                                                                                                                                   | -                         | C_uni96_01006_mRNA_6,1  | -                    |
| GF0039700 | 0                      | 1                | 0                 | Hypothetical protein (1)                                          | -                                                                                                                                                                                                                                                                                                                                                                                                                                                                      | -                                                                                                                                                                                                                                                                                                                                                                                                                                                                                                                                                                                         | -                         | C_uni96_01006_mRNA_1,1  | -                    |
| GF0039699 | 0                      | 1                | 0                 | Hypothetical protein (1)                                          | nucleic acid binding [GO:0003676 molecular_function] (1); zinc ion binding [GO:0008270 molecular_function] (1)                                                                                                                                                                                                                                                                                                                                                         | Zinc finger, CCHC-type [IPRO1878] (1); Zinc knuckle/CXC4/4N/C [IPRO25836] (1)                                                                                                                                                                                                                                                                                                                                                                                                                                                                                                             | -                         | C_uni96_01005_mRNA_9,1  | -                    |
| GF0039698 | 0                      | 1                | 0                 | Hypothetical protein (1)                                          | -                                                                                                                                                                                                                                                                                                                                                                                                                                                                      | Domain of unknown function DUF4283 [IPRO25588] (1)                                                                                                                                                                                                                                                                                                                                                                                                                                                                                                                                        | -                         | C_uni96_01005_mRNA_5,1  | -                    |
| GF0039697 | 0                      | 1                | 0                 | Hemaphysin (1)                                                    | -                                                                                                                                                                                                                                                                                                                                                                                                                                                                      | Endonuclease/exonuclease/phosphatase [IPRO05135] (1)                                                                                                                                                                                                                                                                                                                                                                                                                                                                                                                                      | -                         | C_uni96_01005_mRNA_4,1  | -                    |
| GF0039696 | 0                      | 1                | 0                 | Hypothetical protein (1)                                          | -                                                                                                                                                                                                                                                                                                                                                                                                                                                                      | -                                                                                                                                                                                                                                                                                                                                                                                                                                                                                                                                                                                         | -                         | C_uni96_01005_mRNA_2,1  | -                    |
| GF0039695 | 0                      | 1                | 0                 | Hypothetical protein (1)                                          | -                                                                                                                                                                                                                                                                                                                                                                                                                                                                      | -                                                                                                                                                                                                                                                                                                                                                                                                                                                                                                                                                                                         | -                         | C_uni96_01005_mRNA_12,1 | -                    |
| GF0039694 | 0                      | 1                | 0                 | Hypothetical protein (1)                                          | protein kinase activity [GO:0004672 molecular_function] (1); protein phosphorylation [GO:0006468 biological_process] (1); ATP binding [GO:0005214 molecular_function] (1)                                                                                                                                                                                                                                                                                              | Protein kinase domain [IPRO00719] (1); Protein kinase-like domain [IPRO11009] (1)                                                                                                                                                                                                                                                                                                                                                                                                                                                                                                         | -                         | C_uni96_01004_mRNA_8,1  | -                    |
| GF0039693 | 0                      | 1                | 0                 | Diphospho-CoA kinase family isoform (1)                           | ATP binding [GO:0005214 molecular_function] (1); coenzyme A biosynthetic process [GO:0015937 biological_process] (1); diphospho-CoA kinase activity [GO:0004140 molecular_function] (1)                                                                                                                                                                                                                                                                                | Diphospho-CoA kinase [IPRO01977] (1); P-loop containing nucleoside triphosphate-hydrolyase [IPRO27417] (1)                                                                                                                                                                                                                                                                                                                                                                                                                                                                                | -                         | C_uni96_01004_mRNA_2,1  | -                    |
| GF0039692 | 0                      | 1                | 0                 | Hypothetical protein (1)                                          | -                                                                                                                                                                                                                                                                                                                                                                                                                                                                      | -                                                                                                                                                                                                                                                                                                                                                                                                                                                                                                                                                                                         | -                         | C_uni96_01004_mRNA_1,1  | -                    |
| GF0039691 | 0                      | 1                | 0                 | Hypothetical protein (1)                                          | -                                                                                                                                                                                                                                                                                                                                                                                                                                                                      | -                                                                                                                                                                                                                                                                                                                                                                                                                                                                                                                                                                                         | -                         | C_uni96_01003_mRNA_13,1 | -                    |
| GF0039690 | 0                      | 1                | 0                 | Cytokinin riboside 5'-monophosphate phosphoribosyltransferase (1) | -                                                                                                                                                                                                                                                                                                                                                                                                                                                                      | Cytokinin riboside 5'-monophosphate phosphoribosyltransferase LDC [IPRO05269] (1); LOC family [IPRO01100] (1)                                                                                                                                                                                                                                                                                                                                                                                                                                                                             | -                         | C_uni96_01003_mRNA_11,1 | -                    |







| ID        | Num. in C. crottenstei | Num. in C. auris | Num. in P. putida | Note                                                           | GO                                                                                                                                                                                                                                                                                                      | InterPro                                                                                                                                                                                                                                                                                                                                                                        | Members in C. crottenstei | Members in C. auris     | Members in P. putida |
|-----------|------------------------|------------------|-------------------|----------------------------------------------------------------|---------------------------------------------------------------------------------------------------------------------------------------------------------------------------------------------------------------------------------------------------------------------------------------------------------|---------------------------------------------------------------------------------------------------------------------------------------------------------------------------------------------------------------------------------------------------------------------------------------------------------------------------------------------------------------------------------|---------------------------|-------------------------|----------------------|
| GF0039449 | 0                      | 1                | 1                 | 0 Hypothetical protein (1)                                     |                                                                                                                                                                                                                                                                                                         |                                                                                                                                                                                                                                                                                                                                                                                 |                           | C_unihh_00956_mRNA_20.1 |                      |
| GF0039448 | 0                      | 1                | 1                 | 0 Hypothetical protein (1)                                     |                                                                                                                                                                                                                                                                                                         |                                                                                                                                                                                                                                                                                                                                                                                 |                           | C_unihh_00956_mRNA_11.1 |                      |
| GF0039447 | 0                      | 1                | 1                 | 0 Hypothetical protein (1)                                     |                                                                                                                                                                                                                                                                                                         | Domain of unknown function DUF4283 [IPR025588] (1)                                                                                                                                                                                                                                                                                                                              |                           | C_unihh_00956_mRNA_10.1 |                      |
| GF0039446 | 0                      | 1                | 1                 | 0 Hypothetical protein (1)                                     | fatty-acyl-CoA binding [GO:0000062 molecular_function] (1)                                                                                                                                                                                                                                              | FERM-acyl-CoA-binding protein, 3-helical bundle [IPR014352] (1); Acyl-CoA-binding protein, ACBP [IPR000582] (1)                                                                                                                                                                                                                                                                 |                           | C_unihh_00955_mRNA_9.1  |                      |
| GF0039445 | 0                      | 1                | 1                 | 0 Calcium-binding EF-hand family protein (1)                   | calcium ion binding [GO:0005509 molecular_function] (1); fatty-acyl-CoA binding [GO:0000062 molecular_function] (1); protein binding [GO:0005515 molecular_function] (1)                                                                                                                                | EF-hand domain [IPR020848] (1); Askyrin repeat-containing domain [IPR020683] (1); EF-Hand 1, calcium-binding site [IPR026571] (1); EF-hand domain pair [IPR011992] (1); FERM-acyl-CoA-binding protein, 3-helical bundle [IPR014352] (1); Acyl-CoA-binding protein, ACBP [IPR000582] (1); Ankyrin repeat [IPR002110] (1)                                                         |                           | C_unihh_00955_mRNA_8.1  |                      |
| GF0039444 | 0                      | 1                | 1                 | 0 Hypothetical protein (1)                                     |                                                                                                                                                                                                                                                                                                         |                                                                                                                                                                                                                                                                                                                                                                                 |                           | C_unihh_00955_mRNA_7.1  |                      |
| GF0039443 | 0                      | 1                | 1                 | 0 Acyl-CoA binding protein 2 isoform 3 (1)                     | fatty-acyl-CoA binding [GO:0000062 molecular_function] (1)                                                                                                                                                                                                                                              | FERM-acyl-CoA-binding protein, 3-helical bundle [IPR014352] (1); Acyl-CoA-binding protein, ACBP [IPR000582] (1)                                                                                                                                                                                                                                                                 |                           | C_unihh_00955_mRNA_10.1 |                      |
| GF0039442 | 0                      | 1                | 1                 | 0 Hypothetical protein (1)                                     |                                                                                                                                                                                                                                                                                                         | Domain of unknown function DUF2431 [IPR019446] (1)                                                                                                                                                                                                                                                                                                                              |                           | C_unihh_00954_mRNA_8.1  |                      |
| GF0039441 | 0                      | 1                | 1                 | 0 Hypothetical protein (1)                                     |                                                                                                                                                                                                                                                                                                         |                                                                                                                                                                                                                                                                                                                                                                                 |                           | C_unihh_00954_mRNA_7.1  |                      |
| GF0039440 | 0                      | 1                | 1                 | 0 Hypothetical protein (1)                                     |                                                                                                                                                                                                                                                                                                         | Aspartic peptidase domain [IPR021109] (1); Leucine-rich repeat domain, I domain-like [IPR026751] (1)                                                                                                                                                                                                                                                                            |                           | C_unihh_00954_mRNA_4.1  |                      |
| GF0039439 | 0                      | 1                | 1                 | 0 Hypothetical protein (1)                                     |                                                                                                                                                                                                                                                                                                         |                                                                                                                                                                                                                                                                                                                                                                                 |                           | C_unihh_00954_mRNA_17.1 |                      |
| GF0039438 | 0                      | 1                | 1                 | 0 Hypothetical protein (1)                                     | adenylohomocysteinase activity [GO:0040113 molecular_function] (1); one-carbon metabolic process [GO:0006730 biological_process] (1)                                                                                                                                                                    | Adenylohomocysteinase [IPR000043] (1); S-adenosyl-L-homocysteinase hydrolase, NAD-binding domain [IPR015878] (1)                                                                                                                                                                                                                                                                |                           | C_unihh_00954_mRNA_16.1 |                      |
| GF0039437 | 0                      | 1                | 1                 | 0 Hypothetical protein (1)                                     |                                                                                                                                                                                                                                                                                                         |                                                                                                                                                                                                                                                                                                                                                                                 |                           | C_unihh_00954_mRNA_15.1 |                      |
| GF0039436 | 0                      | 1                | 1                 | 0 Ribonuclease H-like superfamily protein (1)                  |                                                                                                                                                                                                                                                                                                         | Reverse transcriptase zinc-binding domain [IPR026960] (1)                                                                                                                                                                                                                                                                                                                       |                           | C_unihh_00954_mRNA_14.1 |                      |
| GF0039435 | 0                      | 1                | 1                 | 0 Hypothetical protein (1)                                     |                                                                                                                                                                                                                                                                                                         | Leucine-rich repeat domain, I domain-like [IPR026751] (1); Leucine-rich repeat, typical subtype [IPR03591] (1); Leucine-rich repeat 1 [IPR011731] (1); Toll-interleukin-1 receptor biology (TIR) domain [IPR000157] (1); NB-ARC [IPR000182] (1); Leucine-rich repeat [IPR01611] (1); P-loop containing nucleoside triphosphate hydrolase [IPR027417] (1)                        |                           | C_unihh_00952_mRNA_5.1  |                      |
| GF0039433 | 0                      | 1                | 1                 | 0 Hypothetical protein (1)                                     |                                                                                                                                                                                                                                                                                                         |                                                                                                                                                                                                                                                                                                                                                                                 |                           | C_unihh_00951_mRNA_8.1  |                      |
| GF0039432 | 0                      | 1                | 1                 | 0 Hypothetical protein (1)                                     |                                                                                                                                                                                                                                                                                                         |                                                                                                                                                                                                                                                                                                                                                                                 |                           | C_unihh_00951_mRNA_3.1  |                      |
| GF0039431 | 0                      | 1                | 1                 | 0 Hypothetical protein (1)                                     | proteolysis [GO:0006508 biological_process] (1); cytosolic-type peptidase activity [GO:0008234 molecular_function] (1)                                                                                                                                                                                  | Ulp1 protease family, C-terminal catalytic domain [IPR004542] (1)                                                                                                                                                                                                                                                                                                               |                           | C_unihh_00950_mRNA_7.1  |                      |
| GF0039430 | 0                      | 1                | 1                 | 0 Hypothetical protein (1)                                     |                                                                                                                                                                                                                                                                                                         |                                                                                                                                                                                                                                                                                                                                                                                 |                           | C_unihh_00950_mRNA_2.1  |                      |
| GF0039429 | 0                      | 1                | 1                 | 0 Hypothetical protein (1)                                     |                                                                                                                                                                                                                                                                                                         |                                                                                                                                                                                                                                                                                                                                                                                 |                           | C_unihh_00929_mRNA_7.1  |                      |
| GF0039428 | 0                      | 1                | 1                 | 0 Hypothetical protein (1)                                     |                                                                                                                                                                                                                                                                                                         |                                                                                                                                                                                                                                                                                                                                                                                 |                           | C_unihh_00928_mRNA_8.1  |                      |
| GF0039427 | 0                      | 1                | 1                 | 0 Hypothetical protein (1)                                     |                                                                                                                                                                                                                                                                                                         | Endonuclease/exonuclease/phosphatase [IPR005135] (1)                                                                                                                                                                                                                                                                                                                            |                           | C_unihh_00928_mRNA_7.1  |                      |
| GF0039426 | 0                      | 1                | 1                 | 0 Hypothetical protein (1)                                     |                                                                                                                                                                                                                                                                                                         |                                                                                                                                                                                                                                                                                                                                                                                 |                           | C_unihh_00928_mRNA_4.1  |                      |
| GF0039425 | 0                      | 1                | 1                 | 0 CDNA clone 001-130-G10, full insert sequence (1)             |                                                                                                                                                                                                                                                                                                         | Retroviral gagpart protein [IPR013242] (1)                                                                                                                                                                                                                                                                                                                                      |                           | C_unihh_00928_mRNA_3.1  |                      |
| GF0039424 | 0                      | 1                | 1                 | 0 Hypothetical protein (1)                                     |                                                                                                                                                                                                                                                                                                         |                                                                                                                                                                                                                                                                                                                                                                                 |                           | C_unihh_00928_mRNA_2.1  |                      |
| GF0039423 | 0                      | 1                | 1                 | 0 Hypothetical protein (1)                                     |                                                                                                                                                                                                                                                                                                         |                                                                                                                                                                                                                                                                                                                                                                                 |                           | C_unihh_00928_mRNA_12.1 |                      |
| GF0039422 | 0                      | 1                | 1                 | 0 Hypothetical protein (1)                                     |                                                                                                                                                                                                                                                                                                         |                                                                                                                                                                                                                                                                                                                                                                                 |                           | C_unihh_00928_mRNA_1.1  |                      |
| GF0039421 | 0                      | 1                | 1                 | 0 CC-NBS-LRR disease resistance protein (1)                    | ADP binding [GO:0043531 molecular_function] (1)                                                                                                                                                                                                                                                         | NB-ARC [IPR02182] (1); P-loop containing nucleoside triphosphate hydrolase [IPR027417] (1)                                                                                                                                                                                                                                                                                      |                           | C_unihh_00927_mRNA_9.1  |                      |
| GF0039420 | 0                      | 1                | 1                 | 0 Hypothetical protein (1)                                     | nucleic acid binding [GO:0003676 molecular_function] (1)                                                                                                                                                                                                                                                | Ribonuclease H-like domain [IPR012337] (1); Retrotransposon gag domain [IPR005162] (1)                                                                                                                                                                                                                                                                                          |                           | C_unihh_00927_mRNA_5.1  |                      |
| GF0039419 | 0                      | 1                | 1                 | 0 Xylohexan endorhamnosylase/hydrolase protein (1)             | hydrolyase activity, hydrolyzing O-glycosyl compounds [GO:0004555 molecular_function] (1); carbohydrate metabolic process [GO:0005975 biological_process] (1)                                                                                                                                           | Concanavalin A-like lectin/ghanosase domain [IPR03320] (1); Glycoside hydrolase family 16 [IPR000757] (1)                                                                                                                                                                                                                                                                       |                           | C_unihh_00927_mRNA_2.1  |                      |
| GF0039418 | 0                      | 1                | 1                 | 0 Hypothetical protein (1)                                     |                                                                                                                                                                                                                                                                                                         |                                                                                                                                                                                                                                                                                                                                                                                 |                           | C_unihh_00927_mRNA_16.1 |                      |
| GF0039417 | 0                      | 1                | 1                 | 0 Hypothetical protein (1)                                     |                                                                                                                                                                                                                                                                                                         | Leucine-rich repeat domain, I domain-like [IPR026751] (1)                                                                                                                                                                                                                                                                                                                       |                           | C_unihh_00927_mRNA_13.1 |                      |
| GF0039416 | 0                      | 1                | 1                 | 0 Disease resistance RPS5-like protein (1)                     | ADP binding [GO:0043531 molecular_function] (1)                                                                                                                                                                                                                                                         | NB-ARC [IPR02182] (1); P-loop containing nucleoside triphosphate hydrolase [IPR027417] (1)                                                                                                                                                                                                                                                                                      |                           | C_unihh_00927_mRNA_12.1 |                      |
| GF0039415 | 0                      | 1                | 1                 | 0 Putative disease resistance gene NBS-LRR family protein (1)  | ADP binding [GO:0043531 molecular_function] (1)                                                                                                                                                                                                                                                         | P-loop containing nucleoside triphosphate hydrolase [IPR027417] (1); NB-ARC [IPR02182] (1); Leucine-rich repeat domain, I domain-like [IPR026751] (1)                                                                                                                                                                                                                           |                           | C_unihh_00927_mRNA_11.1 |                      |
| GF0039414 | 0                      | 1                | 1                 | 0 Disease resistance protein RPS5 (1)                          | ADP binding [GO:0043531 molecular_function] (1)                                                                                                                                                                                                                                                         | NB-ARC [IPR02182] (1); P-loop containing nucleoside triphosphate hydrolase [IPR027417] (1)                                                                                                                                                                                                                                                                                      |                           | C_unihh_00927_mRNA_10.1 |                      |
| GF0039413 | 0                      | 1                | 1                 | 0 Hypothetical protein (1)                                     |                                                                                                                                                                                                                                                                                                         |                                                                                                                                                                                                                                                                                                                                                                                 |                           | C_unihh_00926_mRNA_6.1  |                      |
| GF0039412 | 0                      | 1                | 1                 | 0 Hypothetical protein (1)                                     | chlorophyll binding [GO:0016168 molecular_function] (1); photosystem [GO:0009521 cellular_component] (1); photosynthesis, light reaction [GO:0019884 biological_process] (1); membrane [GO:0016020 cellular_component] (1); photosynthetic electron transport chain [GO:0009767 biological_process] (1) | Photosystem antenna protein-like [IPR009922] (1)                                                                                                                                                                                                                                                                                                                                |                           | C_unihh_00926_mRNA_2.1  |                      |
| GF0039411 | 0                      | 1                | 1                 | 0 Hypothetical protein (1)                                     |                                                                                                                                                                                                                                                                                                         |                                                                                                                                                                                                                                                                                                                                                                                 |                           | C_unihh_00924_mRNA_8.1  |                      |
| GF0039410 | 0                      | 1                | 1                 | 0 Disease resistance protein (1)                               | ADP binding [GO:0043531 molecular_function] (1)                                                                                                                                                                                                                                                         | Leucine-rich repeat domain, I domain-like [IPR026751] (1); P-loop containing nucleoside triphosphate hydrolase [IPR027417] (1); NB-ARC [IPR02182] (1)                                                                                                                                                                                                                           |                           | C_unihh_00924_mRNA_18.1 |                      |
| GF0039409 | 0                      | 1                | 1                 | 0 Disease resistance protein (1)                               | ADP binding [GO:0043531 molecular_function] (1)                                                                                                                                                                                                                                                         | NB-ARC [IPR02182] (1); P-loop containing nucleoside triphosphate hydrolase [IPR027417] (1)                                                                                                                                                                                                                                                                                      |                           | C_unihh_00924_mRNA_15.1 |                      |
| GF0039408 | 0                      | 1                | 1                 | 0 Hypothetical protein (1)                                     |                                                                                                                                                                                                                                                                                                         |                                                                                                                                                                                                                                                                                                                                                                                 |                           | C_unihh_00924_mRNA_14.1 |                      |
| GF0039407 | 0                      | 1                | 1                 | 0 Hypothetical protein (1)                                     |                                                                                                                                                                                                                                                                                                         |                                                                                                                                                                                                                                                                                                                                                                                 |                           | C_unihh_00924_mRNA_11.1 |                      |
| GF0039406 | 0                      | 1                | 1                 | 0 Hypothetical protein (1)                                     | protein binding [GO:0005515 molecular_function] (1)                                                                                                                                                                                                                                                     | Leucine-rich repeat domain, I domain-like [IPR026751] (1); Leucine-rich repeat [IPR01611] (1)                                                                                                                                                                                                                                                                                   |                           | C_unihh_00924_mRNA_10.1 |                      |
| GF0039405 | 0                      | 1                | 1                 | 0 Exosome complex exonuclease rps45, relative (1)              | exosome (RNase complex) [GO:000178 cellular_component] (1); RNA processing [GO:0006396 biological_process] (1)                                                                                                                                                                                          | Exosome complex component RRP45 [IPR033103] (1); PNase/PNase-PH domain [IPR027408] (1); Exoribonuclease, phosphorolytic domain 1 [IPR012471] (1); Ribosomal protein S8 domain 2-type fold [IPR025568] (1); Exoribonuclease, phosphorolytic domain 2 [IPR015847] (1)                                                                                                             |                           | C_unihh_00923_mRNA_6.1  |                      |
| GF0039404 | 0                      | 1                | 1                 | 0 Hypothetical protein (1)                                     | ATP binding [GO:0005524 molecular_function] (1); protein phosphorylation [GO:0006468 biological_process] (1); protein kinase activity [GO:0004672 molecular_function] (1)                                                                                                                               | Protein kinase-like domain [IPR011009] (1); Protein kinase domain [IPR007079] (1); Protein kinase, ATP binding site [IPR017441] (1); Serine/threonine/dual specificity protein kinase, catalytic domain [IPR002290] (1)                                                                                                                                                         |                           | C_unihh_00923_mRNA_4.1  |                      |
| GF0039403 | 0                      | 1                | 1                 | 0 Subtilase family protein (1)                                 | proteolysis [GO:0006508 biological_process] (1); serine-type endopeptidase activity [GO:0004252 molecular_function] (1)                                                                                                                                                                                 | Peptidase S8, subtilisin, Ser-active site [IPR023828] (1); Peptidase S8/S53 domain [IPR000299] (1); Peptidase S8, subtilisin-related [IPR015500] (1)                                                                                                                                                                                                                            |                           | C_unihh_00923_mRNA_15.1 |                      |
| GF0039402 | 0                      | 1                | 1                 | 0 Hypothetical protein (1)                                     | nucleic acid binding [GO:0003676 molecular_function] (1)                                                                                                                                                                                                                                                | Ribonuclease H-like domain [IPR012337] (1)                                                                                                                                                                                                                                                                                                                                      |                           | C_unihh_00922_mRNA_5.1  |                      |
| GF0039401 | 0                      | 1                | 1                 | 0 Hypothetical protein (1)                                     |                                                                                                                                                                                                                                                                                                         |                                                                                                                                                                                                                                                                                                                                                                                 |                           | C_unihh_00922_mRNA_11.1 |                      |
| GF0039400 | 0                      | 1                | 1                 | 0 Hypothetical protein (1)                                     | RNA binding [GO:0003677 molecular_function] (1); nucleic acid binding [GO:0003676 molecular_function] (1); protein dimerization activity [GO:0046983 molecular_function] (1)                                                                                                                            | HAT, C-terminal dimerization domain [IPR008906] (1); Ribonuclease H-like domain [IPR012337] (1); Zinc finger, BED-type [IPR001656] (1)                                                                                                                                                                                                                                          |                           | C_unihh_00921_mRNA_7.1  |                      |
| GF0039399 | 0                      | 1                | 1                 | 0 Hypothetical protein (1)                                     |                                                                                                                                                                                                                                                                                                         |                                                                                                                                                                                                                                                                                                                                                                                 |                           | C_unihh_00920_mRNA_7.1  |                      |
| GF0039398 | 0                      | 1                | 1                 | 0 Hypothetical protein (1)                                     |                                                                                                                                                                                                                                                                                                         |                                                                                                                                                                                                                                                                                                                                                                                 |                           | C_unihh_00920_mRNA_5.1  |                      |
| GF0039397 | 0                      | 1                | 1                 | 0 Hypothetical protein (1)                                     |                                                                                                                                                                                                                                                                                                         |                                                                                                                                                                                                                                                                                                                                                                                 |                           | C_unihh_00919_mRNA_7.1  |                      |
| GF0039396 | 0                      | 1                | 1                 | 0 Hypothetical protein (1)                                     |                                                                                                                                                                                                                                                                                                         |                                                                                                                                                                                                                                                                                                                                                                                 |                           | C_unihh_00919_mRNA_6.1  |                      |
| GF0039395 | 0                      | 1                | 1                 | 0 Similarity to non-LTR retroelement reverse transcriptase (1) | nucleic acid binding [GO:0003676 molecular_function] (1)                                                                                                                                                                                                                                                | Reverse transcriptase zinc-binding domain [IPR026960] (1); Ribonuclease H-like domain [IPR012337] (1)                                                                                                                                                                                                                                                                           |                           | C_unihh_00918_mRNA_4.1  |                      |
| GF0039394 | 0                      | 1                | 1                 | 0 Arginine 2-monooxygenase (1)                                 | spermidine biosynthetic process [GO:0008295 biological_process] (1); arginine catabolic process [GO:0004527 biological_process] (1); arginine decarboxylase activity [GO:0008792 molecular_function] (1); catabolic activity [GO:0003824 molecular_function] (1)                                        | PLP-binding barrel [IPR029066] (1); Orn-DAP-Arg decarboxylase-2, N-terminal [IPR026444] (1); Ornithine-DAP-Arg decarboxylase [IPR000183] (1); Arginine decarboxylase [IPR029851] (1); Orn-DAP-Arg decarboxylase 2, pyridoxal-phosphate binding site [IPR022653] (1)                                                                                                             |                           | C_unihh_00918_mRNA_3.1  |                      |
| GF0039393 | 0                      | 1                | 1                 | 0 Arginine 2-monooxygenase (1)                                 | arginine decarboxylase activity [GO:0008792 molecular_function] (1); arginine catabolic process [GO:0004527 biological_process] (1); catalytic activity [GO:0003824 molecular_function] (1); spermidine biosynthetic process [GO:0008295 biological_process] (1)                                        | PLP-binding barrel [IPR029066] (1); Orn-DAP-Arg decarboxylase 2, C-terminal [IPR026443] (1); Orn-DAP-Arg decarboxylase 2, conserved site [IPR026217] (1); Alanine racemase/group IV decarboxylase, C-terminal [IPR009006] (1); Orn-DAP-Arg decarboxylase 2, N-terminal [IPR026444] (1); Ornithine-DAP-Arg decarboxylase [IPR000183] (1); Arginine decarboxylase [IPR029851] (1) |                           | C_unihh_00918_mRNA_14.1 |                      |
| GF0039392 | 0                      | 1                | 1                 | 0 Hypothetical protein (1)                                     |                                                                                                                                                                                                                                                                                                         |                                                                                                                                                                                                                                                                                                                                                                                 |                           | C_unihh_00918_mRNA_14.1 |                      |



| ID       | Num. in <i>C. crottensteini</i> | Num. in <i>C. caudata</i> | Num. in <i>P. trifidatus</i> | Note                                                         | GO                                                                                                                                                                                                                                                                                                                                                                                                                                                       | InterPro                                                                                                                                                                                                                                                                                                                                                                                                                                                                                                 | Members in <i>C. crottensteini</i> | Members in <i>C. caudata</i> | Members in <i>P. trifidatus</i> |
|----------|---------------------------------|---------------------------|------------------------------|--------------------------------------------------------------|----------------------------------------------------------------------------------------------------------------------------------------------------------------------------------------------------------------------------------------------------------------------------------------------------------------------------------------------------------------------------------------------------------------------------------------------------------|----------------------------------------------------------------------------------------------------------------------------------------------------------------------------------------------------------------------------------------------------------------------------------------------------------------------------------------------------------------------------------------------------------------------------------------------------------------------------------------------------------|------------------------------------|------------------------------|---------------------------------|
| GF003991 | 0                               | 1                         | 1                            | 0 LRR receptor-like kinase family protein (1)                | protein binding [GO:005515 molecular_function] (1)                                                                                                                                                                                                                                                                                                                                                                                                       | Leucine-rich repeat [IPR01611] (1); Leucine-rich repeat-containing N-terminal, plant-type [IPR013210] (1); Leucine-rich repeat, typical subtype [IPR00591] (1); Protein kinase-like domain [IPR01009] (1); Leucine-rich repeat domain, L domain-like [IPR032675] (1)                                                                                                                                                                                                                                     |                                    | C_unihit_00918_mRNA_13.1     | -                               |
| GF003990 | 0                               | 1                         | 1                            | 0 Hypothetical protein (1)                                   | transferase activity, transferring hexosyl groups [GO:001678 molecular_function] (1); metabolic process [GO:000152 biological_process] (1)                                                                                                                                                                                                                                                                                                               | UDP-glucuronoyl/UDP-glucosyltransferase [IPR002131] (1)                                                                                                                                                                                                                                                                                                                                                                                                                                                  |                                    | C_unihit_00917_mRNA_7.1      | -                               |
| GF003989 | 0                               | 1                         | 1                            | 0 Pre-miRNA-splicing factor ATP-dependent RNA helicase (1)   | ATP binding [GO:000524 molecular_function] (1); nucleic acid binding [GO:000376 molecular_function] (1); helicase activity [GO:004386 molecular_function] (1); ATP-dependent helicase activity [GO:0008026 molecular_function] (1)                                                                                                                                                                                                                       | P-loop containing nucleoside triphosphate hydrolase [IPR027417] (1); Helicase superfamily 12; ATP-binding domain [IPR014001] (1); DNA/RNA helicase, ATP-dependent, DEAD-box type, conserved site [IPR002661] (1); Helicase-associated domain [IPR007502] (1); Domain of unknown function DUF1605 [IPR011709] (1); Helicase, C-terminal [IPR001650] (1)                                                                                                                                                   |                                    | C_unihit_00917_mRNA_14.1     | -                               |
| GF003988 | 0                               | 1                         | 1                            | 0 Hypothetical protein (1)                                   | polysaccharide biosynthetic process [GO:000271 biological_process] (1); oxidoreductase activity [GO:001690 molecular_function] (1); oxidation-reduction process [GO:005514 biological_process] (1); NAD binding [GO:0051287 molecular_function] (1); oxidoreductase activity, acting on the CH-OH group of donors, NAD or NADP as acceptor [GO:0016616 molecular_function] (1); UDP-glucose 6-dehydrogenase activity [GO:0003979 molecular_function] (1) | UDP-glucose-GDP-mannose dehydrogenase, disimination [IPR014026] (1); UDP-glucose-GDP-mannose dehydrogenase, N-terminal [IPR001732] (1); NADOP-binding domain [IPR016400] (1); UDP-glucose 6-dehydrogenase, bacterial type [IPR028357] (1); UDP-glucose-GDP-mannose dehydrogenase, C-terminal [IPR014027] (1); 6-phosphogluconate dehydrogenase C-terminal domain-like [IPR009271] (1); 6-phosphogluconate dehydrogenase, domain 2 [IPR013328] (1); UDP-glucose-GDP-mannose dehydrogenase [IPR017476] (1) |                                    | C_unihit_00917_mRNA_13.1     | -                               |
| GF003987 | 0                               | 1                         | 1                            | 0 Hypothetical protein (1)                                   |                                                                                                                                                                                                                                                                                                                                                                                                                                                          |                                                                                                                                                                                                                                                                                                                                                                                                                                                                                                          |                                    | C_unihit_00916_mRNA_6.1      | -                               |
| GF003986 | 0                               | 1                         | 1                            | 0 Hypothetical protein (1)                                   |                                                                                                                                                                                                                                                                                                                                                                                                                                                          |                                                                                                                                                                                                                                                                                                                                                                                                                                                                                                          |                                    | C_unihit_00916_mRNA_5.1      | -                               |
| GF003985 | 0                               | 1                         | 1                            | 0 Hypothetical protein (1)                                   |                                                                                                                                                                                                                                                                                                                                                                                                                                                          |                                                                                                                                                                                                                                                                                                                                                                                                                                                                                                          |                                    | C_unihit_00916_mRNA_12.1     | -                               |
| GF003984 | 0                               | 1                         | 1                            | 0 Hypothetical protein (1)                                   |                                                                                                                                                                                                                                                                                                                                                                                                                                                          |                                                                                                                                                                                                                                                                                                                                                                                                                                                                                                          |                                    | C_unihit_00916_mRNA_11.1     | -                               |
| GF003983 | 0                               | 1                         | 1                            | 0 Hypothetical protein (1)                                   |                                                                                                                                                                                                                                                                                                                                                                                                                                                          |                                                                                                                                                                                                                                                                                                                                                                                                                                                                                                          |                                    | C_unihit_00915_mRNA_9.1      | -                               |
| GF003982 | 0                               | 1                         | 1                            | 0 Hypothetical protein (1)                                   |                                                                                                                                                                                                                                                                                                                                                                                                                                                          |                                                                                                                                                                                                                                                                                                                                                                                                                                                                                                          |                                    | C_unihit_00915_mRNA_8.1      | -                               |
| GF003981 | 0                               | 1                         | 1                            | 0 Hypothetical protein (1)                                   |                                                                                                                                                                                                                                                                                                                                                                                                                                                          |                                                                                                                                                                                                                                                                                                                                                                                                                                                                                                          |                                    | C_unihit_00915_mRNA_7.1      | -                               |
| GF003980 | 0                               | 1                         | 1                            | 0 Hypothetical protein (1)                                   |                                                                                                                                                                                                                                                                                                                                                                                                                                                          |                                                                                                                                                                                                                                                                                                                                                                                                                                                                                                          |                                    | C_unihit_00915_mRNA_6.1      | -                               |
| GF003979 | 0                               | 1                         | 1                            | 0 Hypothetical protein (1)                                   |                                                                                                                                                                                                                                                                                                                                                                                                                                                          |                                                                                                                                                                                                                                                                                                                                                                                                                                                                                                          |                                    | C_unihit_00915_mRNA_5.1      | -                               |
| GF003978 | 0                               | 1                         | 1                            | 0 Hypothetical protein (1)                                   |                                                                                                                                                                                                                                                                                                                                                                                                                                                          |                                                                                                                                                                                                                                                                                                                                                                                                                                                                                                          |                                    | C_unihit_00915_mRNA_4.1      | -                               |
| GF003977 | 0                               | 1                         | 1                            | 0 Hypothetical protein (1)                                   |                                                                                                                                                                                                                                                                                                                                                                                                                                                          |                                                                                                                                                                                                                                                                                                                                                                                                                                                                                                          |                                    | C_unihit_00915_mRNA_3.1      | -                               |
| GF003976 | 0                               | 1                         | 1                            | 0 Hypothetical protein (1)                                   |                                                                                                                                                                                                                                                                                                                                                                                                                                                          |                                                                                                                                                                                                                                                                                                                                                                                                                                                                                                          |                                    | C_unihit_00915_mRNA_2.1      | -                               |
| GF003975 | 0                               | 1                         | 1                            | 0 Hypothetical protein (1)                                   |                                                                                                                                                                                                                                                                                                                                                                                                                                                          |                                                                                                                                                                                                                                                                                                                                                                                                                                                                                                          |                                    | C_unihit_00915_mRNA_13.1     | -                               |
| GF003974 | 0                               | 1                         | 1                            | 0 Hypothetical protein (1)                                   |                                                                                                                                                                                                                                                                                                                                                                                                                                                          |                                                                                                                                                                                                                                                                                                                                                                                                                                                                                                          |                                    | C_unihit_00915_mRNA_12.1     | -                               |
| GF003973 | 0                               | 1                         | 1                            | 0 Hypothetical protein (1)                                   |                                                                                                                                                                                                                                                                                                                                                                                                                                                          |                                                                                                                                                                                                                                                                                                                                                                                                                                                                                                          |                                    | C_unihit_00915_mRNA_11.1     | -                               |
| GF003972 | 0                               | 1                         | 1                            | 0 Hypothetical protein (1)                                   |                                                                                                                                                                                                                                                                                                                                                                                                                                                          |                                                                                                                                                                                                                                                                                                                                                                                                                                                                                                          |                                    | C_unihit_00915_mRNA_10.1     | -                               |
| GF003971 | 0                               | 1                         | 1                            | 0 Hypothetical protein (1)                                   |                                                                                                                                                                                                                                                                                                                                                                                                                                                          |                                                                                                                                                                                                                                                                                                                                                                                                                                                                                                          |                                    | C_unihit_00914_mRNA_7.1      | -                               |
| GF003970 | 0                               | 1                         | 1                            | 0 Hypothetical protein (1)                                   |                                                                                                                                                                                                                                                                                                                                                                                                                                                          |                                                                                                                                                                                                                                                                                                                                                                                                                                                                                                          |                                    | C_unihit_00914_mRNA_4.1      | -                               |
| GF003969 | 0                               | 1                         | 1                            | 0 Hypothetical protein (1)                                   |                                                                                                                                                                                                                                                                                                                                                                                                                                                          |                                                                                                                                                                                                                                                                                                                                                                                                                                                                                                          |                                    | C_unihit_00914_mRNA_13.1     | -                               |
| GF003968 | 0                               | 1                         | 1                            | 0 Hypothetical protein (1)                                   |                                                                                                                                                                                                                                                                                                                                                                                                                                                          |                                                                                                                                                                                                                                                                                                                                                                                                                                                                                                          |                                    | C_unihit_00914_mRNA_12.1     | -                               |
| GF003967 | 0                               | 1                         | 1                            | 0 Hypothetical protein (1)                                   |                                                                                                                                                                                                                                                                                                                                                                                                                                                          |                                                                                                                                                                                                                                                                                                                                                                                                                                                                                                          |                                    | C_unihit_00914_mRNA_11.1     | -                               |
| GF003966 | 0                               | 1                         | 1                            | 0 Hypothetical protein (1)                                   |                                                                                                                                                                                                                                                                                                                                                                                                                                                          |                                                                                                                                                                                                                                                                                                                                                                                                                                                                                                          |                                    | C_unihit_00913_mRNA_7.1      | -                               |
| GF003965 | 0                               | 1                         | 1                            | 0 Hypothetical protein (1)                                   |                                                                                                                                                                                                                                                                                                                                                                                                                                                          |                                                                                                                                                                                                                                                                                                                                                                                                                                                                                                          |                                    | C_unihit_00913_mRNA_3.1      | -                               |
| GF003964 | 0                               | 1                         | 1                            | 0 Hypothetical protein (1)                                   |                                                                                                                                                                                                                                                                                                                                                                                                                                                          |                                                                                                                                                                                                                                                                                                                                                                                                                                                                                                          |                                    | C_unihit_00912_mRNA_7.1      | -                               |
| GF003963 | 0                               | 1                         | 1                            | 0 Hypothetical protein (1)                                   |                                                                                                                                                                                                                                                                                                                                                                                                                                                          |                                                                                                                                                                                                                                                                                                                                                                                                                                                                                                          |                                    | C_unihit_00912_mRNA_16.1     | -                               |
| GF003962 | 0                               | 1                         | 1                            | 0 Hypothetical protein (1)                                   |                                                                                                                                                                                                                                                                                                                                                                                                                                                          |                                                                                                                                                                                                                                                                                                                                                                                                                                                                                                          |                                    | C_unihit_00912_mRNA_14.1     | -                               |
| GF003961 | 0                               | 1                         | 1                            | 0 Hypothetical protein (1)                                   |                                                                                                                                                                                                                                                                                                                                                                                                                                                          |                                                                                                                                                                                                                                                                                                                                                                                                                                                                                                          |                                    | C_unihit_00912_mRNA_12.1     | -                               |
| GF003960 | 0                               | 1                         | 1                            | 0 Hypothetical protein (1)                                   |                                                                                                                                                                                                                                                                                                                                                                                                                                                          |                                                                                                                                                                                                                                                                                                                                                                                                                                                                                                          |                                    | C_unihit_00912_mRNA_11.1     | -                               |
| GF003959 | 0                               | 1                         | 1                            | 0 Hypothetical protein (1)                                   |                                                                                                                                                                                                                                                                                                                                                                                                                                                          |                                                                                                                                                                                                                                                                                                                                                                                                                                                                                                          |                                    | C_unihit_00911_mRNA_9.1      | -                               |
| GF003958 | 0                               | 1                         | 1                            | 0 Hypothetical protein (1)                                   |                                                                                                                                                                                                                                                                                                                                                                                                                                                          |                                                                                                                                                                                                                                                                                                                                                                                                                                                                                                          |                                    | C_unihit_00911_mRNA_8.1      | -                               |
| GF003957 | 0                               | 1                         | 1                            | 0 Disease resistance family protein / LRR family protein (1) | protein binding [GO:005515 molecular_function] (1)                                                                                                                                                                                                                                                                                                                                                                                                       | Leucine-rich repeat [IPR01611] (1); Leucine-rich repeat domain, L domain-like [IPR02675] (1); Leucine-rich repeat, typical subtype [IPR00591] (1); Leucine-rich repeat domain, L domain-like [IPR032675] (1); Leucine-rich repeat [IPR01611] (1); Leucine-rich repeat-containing N-terminal, plant-type [IPR013210] (1)                                                                                                                                                                                  |                                    | C_unihit_00911_mRNA_6.1      | -                               |
| GF003956 | 0                               | 1                         | 1                            | 0 Leucine-rich repeat receptor-like protein kinase PX11 (1)  | protein binding [GO:005515 molecular_function] (1)                                                                                                                                                                                                                                                                                                                                                                                                       | Leucine-rich repeat [IPR01611] (1); Leucine-rich repeat domain, L domain-like [IPR032675] (1); Leucine-rich repeat [IPR01611] (1); Leucine-rich repeat-containing N-terminal, plant-type [IPR013210] (1)                                                                                                                                                                                                                                                                                                 |                                    | C_unihit_00911_mRNA_5.1      | -                               |
| GF003955 | 0                               | 1                         | 1                            | 0 Hypothetical protein (1)                                   |                                                                                                                                                                                                                                                                                                                                                                                                                                                          |                                                                                                                                                                                                                                                                                                                                                                                                                                                                                                          |                                    | C_unihit_00911_mRNA_11.1     | -                               |
| GF003954 | 0                               | 1                         | 1                            | 0 Hypothetical protein (1)                                   |                                                                                                                                                                                                                                                                                                                                                                                                                                                          |                                                                                                                                                                                                                                                                                                                                                                                                                                                                                                          |                                    | C_unihit_00911_mRNA_10.1     | -                               |
| GF003953 | 0                               | 1                         | 1                            | 0 Hypothetical protein (1)                                   |                                                                                                                                                                                                                                                                                                                                                                                                                                                          |                                                                                                                                                                                                                                                                                                                                                                                                                                                                                                          |                                    | C_unihit_00910_mRNA_2.1      | -                               |
| GF003952 | 0                               | 1                         | 1                            | 0 Hypothetical protein (1)                                   | nucleic acid binding [GO:000376 molecular_function] (1); zinc ion binding [GO:0008270 molecular_function] (1)                                                                                                                                                                                                                                                                                                                                            | Zinc finger, CCHC-type [IPR001878] (1)                                                                                                                                                                                                                                                                                                                                                                                                                                                                   |                                    | C_unihit_00910_mRNA_13.1     | -                               |
| GF003951 | 0                               | 1                         | 1                            | 0 Hypothetical protein (1)                                   |                                                                                                                                                                                                                                                                                                                                                                                                                                                          |                                                                                                                                                                                                                                                                                                                                                                                                                                                                                                          |                                    | C_unihit_00910_mRNA_12.1     | -                               |
| GF003950 | 0                               | 1                         | 1                            | 0 Hypothetical protein (1)                                   |                                                                                                                                                                                                                                                                                                                                                                                                                                                          |                                                                                                                                                                                                                                                                                                                                                                                                                                                                                                          |                                    | C_unihit_00910_mRNA_11.1     | -                               |
| GF003949 | 0                               | 1                         | 1                            | 0 Hypothetical protein (1)                                   |                                                                                                                                                                                                                                                                                                                                                                                                                                                          |                                                                                                                                                                                                                                                                                                                                                                                                                                                                                                          |                                    | C_unihit_00909_mRNA_6.1      | -                               |
| GF003948 | 0                               | 1                         | 1                            | 0 Hypothetical protein (1)                                   | cysteine-type peptidase activity [GO:0008234 molecular_function] (1); proteolysis [GO:0006508 biological_process] (1)                                                                                                                                                                                                                                                                                                                                    | Ulp1 protease family, C-terminal catalytic domain [IPR006453] (1)                                                                                                                                                                                                                                                                                                                                                                                                                                        |                                    | C_unihit_00909_mRNA_4.1      | -                               |
| GF003947 | 0                               | 1                         | 1                            | 0 Hypothetical protein (1)                                   |                                                                                                                                                                                                                                                                                                                                                                                                                                                          |                                                                                                                                                                                                                                                                                                                                                                                                                                                                                                          |                                    | C_unihit_00909_mRNA_3.1      | -                               |
| GF003946 | 0                               | 1                         | 1                            | 0 Hypothetical protein (1)                                   |                                                                                                                                                                                                                                                                                                                                                                                                                                                          |                                                                                                                                                                                                                                                                                                                                                                                                                                                                                                          |                                    | C_unihit_00906_mRNA_3.1      | -                               |
| GF003945 | 0                               | 1                         | 1                            | 0 Hypothetical protein (1)                                   |                                                                                                                                                                                                                                                                                                                                                                                                                                                          |                                                                                                                                                                                                                                                                                                                                                                                                                                                                                                          |                                    | C_unihit_00907_mRNA_2.1      | -                               |
| GF003944 | 0                               | 1                         | 1                            | 0 Hypothetical protein (1)                                   |                                                                                                                                                                                                                                                                                                                                                                                                                                                          |                                                                                                                                                                                                                                                                                                                                                                                                                                                                                                          |                                    | C_unihit_00907_mRNA_10.1     | -                               |
| GF003943 | 0                               | 1                         | 1                            | 0 Hypothetical protein (1)                                   | biosynthetic process [GO:0009058 biological_process] (1); catalytic activity [GO:0003824 molecular_function] (1); pyridoxal phosphate binding [GO:0030170 molecular_function] (1)                                                                                                                                                                                                                                                                        | Pyridoxal phosphate-dependent transaminase [IPR015421] (1); Pyridoxal phosphate-dependent transaminase, major region, subdomain 2 [IPR015422] (1); Pyridoxal phosphate-dependent transaminase, major region, subdomain 1 [IPR015421] (1); Aminotransferase, class I, class I [IPR004639] (1)                                                                                                                                                                                                             |                                    | C_unihit_00907_mRNA_1.1      | -                               |
| GF003942 | 0                               | 1                         | 1                            | 0 Hypothetical protein (1)                                   |                                                                                                                                                                                                                                                                                                                                                                                                                                                          |                                                                                                                                                                                                                                                                                                                                                                                                                                                                                                          |                                    | C_unihit_00906_mRNA_8.1      | -                               |
| GF003941 | 0                               | 1                         | 1                            | 0 Hypothetical protein (1)                                   |                                                                                                                                                                                                                                                                                                                                                                                                                                                          |                                                                                                                                                                                                                                                                                                                                                                                                                                                                                                          |                                    | C_unihit_00906_mRNA_5.1      | -                               |
| GF003940 | 0                               | 1                         | 1                            | 0 RNA polymerase II subunit 5-mediated protein like (1)      |                                                                                                                                                                                                                                                                                                                                                                                                                                                          | Domain of unknown function DUF4216 [IPR025121] (1); Prefoldin-like [IPR04127] (1); Prefoldin [IPR009053] (1)                                                                                                                                                                                                                                                                                                                                                                                             |                                    | C_unihit_00906_mRNA_4.1      | -                               |
| GF003939 | 0                               | 1                         | 1                            | 0 Hypothetical protein (1)                                   |                                                                                                                                                                                                                                                                                                                                                                                                                                                          |                                                                                                                                                                                                                                                                                                                                                                                                                                                                                                          |                                    | C_unihit_00906_mRNA_1.1      | -                               |
| GF003938 | 0                               | 1                         | 1                            | 0 Hypothetical protein (1)                                   |                                                                                                                                                                                                                                                                                                                                                                                                                                                          |                                                                                                                                                                                                                                                                                                                                                                                                                                                                                                          |                                    | C_unihit_00905_mRNA_8.1      | -                               |
| GF003937 | 0                               | 1                         | 1                            | 0 Hypothetical protein (1)                                   |                                                                                                                                                                                                                                                                                                                                                                                                                                                          |                                                                                                                                                                                                                                                                                                                                                                                                                                                                                                          |                                    | C_unihit_00905_mRNA_7.1      | -                               |
| GF003936 | 0                               | 1                         | 1                            | 0 Hypothetical protein (1)                                   |                                                                                                                                                                                                                                                                                                                                                                                                                                                          |                                                                                                                                                                                                                                                                                                                                                                                                                                                                                                          |                                    | C_unihit_00905_mRNA_4.1      | -                               |
| GF003935 | 0                               | 1                         | 1                            | 0 Hypothetical protein (1)                                   |                                                                                                                                                                                                                                                                                                                                                                                                                                                          |                                                                                                                                                                                                                                                                                                                                                                                                                                                                                                          |                                    | C_unihit_00905_mRNA_2.1      | -                               |
| GF003934 | 0                               | 1                         | 1                            | 0 Hypothetical protein (1)                                   |                                                                                                                                                                                                                                                                                                                                                                                                                                                          |                                                                                                                                                                                                                                                                                                                                                                                                                                                                                                          |                                    | C_unihit_00905_mRNA_14.1     | -                               |
| GF003933 | 0                               | 1                         | 1                            | 0 Hypothetical protein (1)                                   |                                                                                                                                                                                                                                                                                                                                                                                                                                                          |                                                                                                                                                                                                                                                                                                                                                                                                                                                                                                          |                                    | C_unihit_00905_mRNA_13.1     | -                               |
| GF003932 | 0                               | 1                         | 1                            | 0 Hypothetical protein (1)                                   |                                                                                                                                                                                                                                                                                                                                                                                                                                                          |                                                                                                                                                                                                                                                                                                                                                                                                                                                                                                          |                                    | C_unihit_00905_mRNA_12.1     | -                               |
| GF003931 | 0                               | 1                         | 1                            | 0 Putative mDR family transposase-like (1)                   | zinc ion binding [GO:0008270 molecular_function] (1)                                                                                                                                                                                                                                                                                                                                                                                                     | Zinc finger, PAM2-type [IPR006564] (1); MULE transposase domain [IPR018289] (1); Zinc finger, SWIM-type [IPR007527] (1)                                                                                                                                                                                                                                                                                                                                                                                  |                                    | C_unihit_00904_mRNA_7.1      | -                               |
| GF003930 | 0                               | 1                         | 1                            | 0 Hypothetical protein (1)                                   | ADP binding [GO:0043531 molecular_function] (1)                                                                                                                                                                                                                                                                                                                                                                                                          | P-loop containing nucleoside triphosphate hydrolase [IPR027417] (1); Ntr-ABC [IPR002182] (1); Leucine-rich repeat domain, L domain-like [IPR032675] (1)                                                                                                                                                                                                                                                                                                                                                  |                                    | C_unihit_00904_mRNA_6.1      | -                               |
| GF003929 | 0                               | 1                         | 1                            | 0 Hypothetical protein (1)                                   |                                                                                                                                                                                                                                                                                                                                                                                                                                                          |                                                                                                                                                                                                                                                                                                                                                                                                                                                                                                          |                                    | C_unihit_00904_mRNA_3.1      | -                               |
| GF003928 | 0                               | 1                         | 1                            | 0 Hypothetical protein (1)                                   |                                                                                                                                                                                                                                                                                                                                                                                                                                                          |                                                                                                                                                                                                                                                                                                                                                                                                                                                                                                          |                                    | C_unihit_00904_mRNA_15.1     | -                               |
| GF003927 | 0                               | 1                         | 1                            | 0 Hypothetical protein (1)                                   |                                                                                                                                                                                                                                                                                                                                                                                                                                                          |                                                                                                                                                                                                                                                                                                                                                                                                                                                                                                          |                                    | C_unihit_00904_mRNA_1.1      | -                               |
| GF003926 | 0                               | 1                         | 1                            | 0 Hypothetical protein (1)                                   |                                                                                                                                                                                                                                                                                                                                                                                                                                                          |                                                                                                                                                                                                                                                                                                                                                                                                                                                                                                          |                                    | C_unihit_00903_mRNA_9.1      | -                               |
| GF003925 | 0                               | 1                         | 1                            | 0 Hypothetical protein (1)                                   |                                                                                                                                                                                                                                                                                                                                                                                                                                                          |                                                                                                                                                                                                                                                                                                                                                                                                                                                                                                          |                                    | C_unihit_00903_mRNA_8.1      | -                               |
| GF003924 | 0                               | 1                         | 1                            | 0 Hypothetical protein (1)                                   |                                                                                                                                                                                                                                                                                                                                                                                                                                                          |                                                                                                                                                                                                                                                                                                                                                                                                                                                                                                          |                                    | C_unihit_00903_mRNA_4.1      | -                               |
| GF003923 | 0                               | 1                         | 1                            | 0 Hypothetical protein (1)                                   |                                                                                                                                                                                                                                                                                                                                                                                                                                                          |                                                                                                                                                                                                                                                                                                                                                                                                                                                                                                          |                                    | C_unihit_00903_mRNA_3.1      | -                               |
| GF003922 | 0                               | 1                         | 1                            | 0 Hypothetical protein (1)                                   |                                                                                                                                                                                                                                                                                                                                                                                                                                                          |                                                                                                                                                                                                                                                                                                                                                                                                                                                                                                          |                                    | C_unihit_00903_mRNA_2.1      | -                               |
| GF003921 | 0                               | 1                         | 1                            | 0 Hypothetical protein (1)                                   |                                                                                                                                                                                                                                                                                                                                                                                                                                                          |                                                                                                                                                                                                                                                                                                                                                                                                                                                                                                          |                                    | C_unihit_00902_mRNA_8.1      | -                               |
| GF003920 | 0                               | 1                         | 1                            | 0 Hypothetical protein (1)                                   | zinc ion binding [GO:0008270 molecular_function] (1); transcription, DNA-templated [GO:0006351 biological_process] (1); nucleus [GO:0005634 cellular_component] (1)                                                                                                                                                                                                                                                                                      | Transcription elongation factor S-III [IPR017890] (1); Transcription elongation factor S-II, central domain [IPR003618] (1)                                                                                                                                                                                                                                                                                                                                                                              |                                    | C_unihit_00902_mRNA_7.1      | -                               |
| GF003919 | 0                               | 1                         | 1                            | 0 Hypothetical protein (1)                                   |                                                                                                                                                                                                                                                                                                                                                                                                                                                          |                                                                                                                                                                                                                                                                                                                                                                                                                                                                                                          |                                    | C_unihit_00902_mRNA_2.1      | -                               |
| GF003918 | 0                               | 1                         | 1                            | 0 Hypothetical protein (1)                                   |                                                                                                                                                                                                                                                                                                                                                                                                                                                          |                                                                                                                                                                                                                                                                                                                                                                                                                                                                                                          |                                    | C_unihit_00902_mRNA_12.1     | -                               |
| GF003917 | 0                               | 1                         | 1                            | 0 Hypothetical protein (1)                                   |                                                                                                                                                                                                                                                                                                                                                                                                                                                          |                                                                                                                                                                                                                                                                                                                                                                                                                                                                                                          |                                    | C_unihit_00901_mRNA_5.1      | -                               |
| GF003916 | 0                               | 1                         | 1                            | 0 Hypothetical protein (1)                                   | regulation of transcription, DNA-templated [GO:0006355 biological_process] (1)                                                                                                                                                                                                                                                                                                                                                                           | FHY3/FAR1 family [IPR031052] (1)                                                                                                                                                                                                                                                                                                                                                                                                                                                                         |                                    | C_unihit_00901_mRNA_4.1      | -                               |
| GF003915 | 0                               | 1                         | 1                            | 0 Hypothetical protein (1)                                   | ATPase activity [GO:0016887 molecular_function] (1); ATP binding [GO:000524 molecular_function] (1)                                                                                                                                                                                                                                                                                                                                                      | Asion-translocating ATPase-like domain [IPR025723] (1); P-loop containing nucleoside triphosphate hydrolase [IPR027417] (1); Anion-coupled ATPase, AnxA/GET3 [IPR016300] (1)                                                                                                                                                                                                                                                                                                                             |                                    | C_unihit_00900_mRNA_5.1      | -                               |
| GF003914 | 0                               | 1                         | 1                            | 0 Hypothetical protein (1)                                   | zinc ion binding [GO:0008270 molecular_function] (1); nucleic acid binding [GO:000376 molecular_function] (1)                                                                                                                                                                                                                                                                                                                                            | Zinc finger, U1-type [IPR003604] (1)                                                                                                                                                                                                                                                                                                                                                                                                                                                                     |                                    | C_unihit_00900_mRNA_18.1     | -                               |
| GF003913 | 0                               | 1                         | 1                            | 0 Hypothetical protein (1)                                   |                                                                                                                                                                                                                                                                                                                                                                                                                                                          |                                                                                                                                                                                                                                                                                                                                                                                                                                                                                                          |                                    | C_unihit_00900_mRNA_14.1     | -                               |
| GF003912 | 0                               | 1                         | 1                            | 0 Hypothetical protein (1)                                   |                                                                                                                                                                                                                                                                                                                                                                                                                                                          |                                                                                                                                                                                                                                                                                                                                                                                                                                                                                                          |                                    | C_unihit_00900_mRNA_12.1     | -                               |

| ID        | Num. in <i>C. crotchi</i> | Num. in <i>C. auris</i> | Num. in <i>P. putida</i> | Note                                                                                                              | GO                                                                                                                                                                                                                                                                                                                          | InterPro                                                                                                                                                                                                                                                                                                                                                                                                                    | Members in <i>C. crotchi</i> | Members in <i>C. auris</i> | Members in <i>P. putida</i> |
|-----------|---------------------------|-------------------------|--------------------------|-------------------------------------------------------------------------------------------------------------------|-----------------------------------------------------------------------------------------------------------------------------------------------------------------------------------------------------------------------------------------------------------------------------------------------------------------------------|-----------------------------------------------------------------------------------------------------------------------------------------------------------------------------------------------------------------------------------------------------------------------------------------------------------------------------------------------------------------------------------------------------------------------------|------------------------------|----------------------------|-----------------------------|
| GF0039311 | 0                         | 1                       | 0                        | Hypothetical protein (1)                                                                                          |                                                                                                                                                                                                                                                                                                                             |                                                                                                                                                                                                                                                                                                                                                                                                                             |                              | C_uni98_00900_mRNA_11.1    | -                           |
| GF0039310 | 0                         | 1                       | 0                        | Hypothetical protein (1)                                                                                          |                                                                                                                                                                                                                                                                                                                             |                                                                                                                                                                                                                                                                                                                                                                                                                             |                              | C_uni98_00900_mRNA_10.1    | -                           |
| GF0039309 | 0                         | 1                       | 0                        | Hypothetical protein (1)                                                                                          |                                                                                                                                                                                                                                                                                                                             |                                                                                                                                                                                                                                                                                                                                                                                                                             |                              | C_uni98_00899_mRNA_2.1     | -                           |
| GF0039308 | 0                         | 1                       | 0                        | Hypothetical protein (1)                                                                                          |                                                                                                                                                                                                                                                                                                                             |                                                                                                                                                                                                                                                                                                                                                                                                                             |                              | C_uni98_00899_mRNA_16.1    | -                           |
| GF0039307 | 0                         | 1                       | 0                        | Truncated cellulose synthase catalytic subunit (1)                                                                | cellulose biosynthetic process [GO:003234 biological_process] (1); membrane [GO:004620 cellular_component] (1); cellulose synthase (UDP-forming) activity [GO:0016760 molecular_function] (1)                                                                                                                               | Cellulose synthase [IPRO05150] (1); Nucleoside-diphosphate-sugar transferases [IPRO29044] (1); Zinc finger, RING/FYVE/PHD-type [IPRO13083] (1)                                                                                                                                                                                                                                                                              |                              | C_uni98_00898_mRNA_6.1     | -                           |
| GF0039306 | 0                         | 1                       | 0                        | Protein COBRA (1)                                                                                                 | cell growth [GO:0016499 biological_process] (1); anchored component of membrane [GO:0031225 cellular_component] (1); cellulose microfibril organization [GO:0010215 biological_process] (1)                                                                                                                                 | COBRA, plant [IPRO06918] (1)                                                                                                                                                                                                                                                                                                                                                                                                |                              | C_uni98_00898_mRNA_5.1     | -                           |
| GF0039305 | 0                         | 1                       | 0                        | Hypothetical protein (1)                                                                                          | vesicle-mediated transport [GO:0016192 biological_process] (1); membrane [GO:0016020 cellular_component] (1)                                                                                                                                                                                                                | t-SNARE [IPRO10989] (1)                                                                                                                                                                                                                                                                                                                                                                                                     |                              | C_uni98_00898_mRNA_4.1     | -                           |
| GF0039304 | 0                         | 1                       | 0                        | Hypothetical protein (1)                                                                                          |                                                                                                                                                                                                                                                                                                                             | Dual domain, conserved site [IPRO18253] (1); Dual domain [IPRO01625] (1)                                                                                                                                                                                                                                                                                                                                                    |                              | C_uni98_00898_mRNA_1.1     | -                           |
| GF0039303 | 0                         | 1                       | 0                        | Putative SWI5NF-related matrix-associated actin-dependent regulator of chemotaxis subfamily A member 3-like 2 (1) | ATP binding [GO:0005524 molecular_function] (1); protein binding [GO:0005515 molecular_function] (1); zinc ion binding [GO:0008270 molecular_function] (1)                                                                                                                                                                  | SNE2-related, N-terminal domain [IPRO03380] (1); Zinc finger, RING-FYVE/PHD-type [IPRO13083] (1); Helicase, C-terminal [IPRO01650] (1); P-loop containing nucleoside triphosphate hydrolase [IPRO27417] (1); Zinc finger, RING-type, conserved site [IPRO17907] (1); Protein of unknown function DUF3128 [IPRO1475] (1); Helicase superfamily 1, ATP-binding domain [IPRO14001] (1); Zinc finger, RING-type [IPRO01841] (1) |                              | C_uni98_00897_mRNA_2.1     | -                           |
| GF0039302 | 0                         | 1                       | 0                        | Hypothetical protein (1)                                                                                          |                                                                                                                                                                                                                                                                                                                             |                                                                                                                                                                                                                                                                                                                                                                                                                             |                              | C_uni98_00896_mRNA_7.1     | -                           |
| GF0039301 | 0                         | 1                       | 0                        | Hypothetical protein (1)                                                                                          |                                                                                                                                                                                                                                                                                                                             |                                                                                                                                                                                                                                                                                                                                                                                                                             |                              | C_uni98_00896_mRNA_3.1     | -                           |
| GF0039300 | 0                         | 1                       | 0                        | Ulp1 peptidase-like (1)                                                                                           |                                                                                                                                                                                                                                                                                                                             | Domain of unknown function DUF1985 [IPRO15410] (1)                                                                                                                                                                                                                                                                                                                                                                          |                              | C_uni98_00895_mRNA_8.1     | -                           |
| GF0039299 | 0                         | 1                       | 0                        | Hypothetical protein (1)                                                                                          |                                                                                                                                                                                                                                                                                                                             |                                                                                                                                                                                                                                                                                                                                                                                                                             |                              | C_uni98_00895_mRNA_6.1     | -                           |
| GF0039298 | 0                         | 1                       | 0                        | Hypothetical protein (1)                                                                                          |                                                                                                                                                                                                                                                                                                                             |                                                                                                                                                                                                                                                                                                                                                                                                                             |                              | C_uni98_00894_mRNA_9.1     | -                           |
| GF0039297 | 0                         | 1                       | 0                        | Hypothetical protein (1)                                                                                          |                                                                                                                                                                                                                                                                                                                             |                                                                                                                                                                                                                                                                                                                                                                                                                             |                              | C_uni98_00893_mRNA_7.1     | -                           |
| GF0039296 | 0                         | 1                       | 0                        | Hypothetical protein (1)                                                                                          |                                                                                                                                                                                                                                                                                                                             |                                                                                                                                                                                                                                                                                                                                                                                                                             |                              | C_uni98_00893_mRNA_6.1     | -                           |
| GF0039295 | 0                         | 1                       | 0                        | Putative mtdR family transposase-like (1)                                                                         |                                                                                                                                                                                                                                                                                                                             | MULE transposase domain [IPRO18289] (1)                                                                                                                                                                                                                                                                                                                                                                                     |                              | C_uni98_00893_mRNA_2.1     | -                           |
| GF0039294 | 0                         | 1                       | 0                        | Hypothetical protein (1)                                                                                          |                                                                                                                                                                                                                                                                                                                             | GroE5-like [IPRO11032] (1)                                                                                                                                                                                                                                                                                                                                                                                                  |                              | C_uni98_00893_mRNA_14.1    | -                           |
| GF0039293 | 0                         | 1                       | 0                        | Hypothetical protein (1)                                                                                          | metal ion binding [GO:0046872 molecular_function] (1); metal cation binding [GO:0003676 molecular_function] (1)                                                                                                                                                                                                             | Zinc finger, CH2 [IPRO07087] (1); Zinc finger, CH2-type/arginine-DNA-binding domain [IPRO13087] (1); Zinc finger, CH2-like [IPRO15880] (1)                                                                                                                                                                                                                                                                                  |                              | C_uni98_00892_mRNA_9.1     | -                           |
| GF0039292 | 0                         | 1                       | 0                        | Leucine-rich repeat transmembrane protein kinase (1)                                                              | protein binding [GO:0005515 molecular_function] (1)                                                                                                                                                                                                                                                                         | Leucine-rich repeat domain, L domain-like [IPRO2675] (1); Leucine-rich repeat, typical subtype [IPRO0591] (1); Leucine-rich repeat [IPRO01611] (1)                                                                                                                                                                                                                                                                          |                              | C_uni98_00892_mRNA_2.1     | -                           |
| GF0039291 | 0                         | 1                       | 0                        | Hypothetical protein (1)                                                                                          |                                                                                                                                                                                                                                                                                                                             |                                                                                                                                                                                                                                                                                                                                                                                                                             |                              | C_uni98_00891_mRNA_7.1     | -                           |
| GF0039290 | 0                         | 1                       | 0                        | E3 ubiquitin-protein ligase CHEFR (1)                                                                             | protein binding [GO:0005515 molecular_function] (1); zinc ion binding [GO:0008270 molecular_function] (1)                                                                                                                                                                                                                   | Zinc finger, RING-type [IPRO01841] (1); Zinc finger, RING-FYVE/PHD-type [IPRO13083] (1)                                                                                                                                                                                                                                                                                                                                     |                              | C_uni98_00891_mRNA_5.1     | -                           |
| GF0039289 | 0                         | 1                       | 0                        | TMV resistance N (1)                                                                                              |                                                                                                                                                                                                                                                                                                                             | Leucine-rich repeat domain, L domain-like [IPRO2675] (1)                                                                                                                                                                                                                                                                                                                                                                    |                              | C_uni98_00891_mRNA_13.1    | -                           |
| GF0039288 | 0                         | 1                       | 0                        | Hypothetical protein (1)                                                                                          | ATP binding [GO:0005524 molecular_function] (1); protein kinase activity [GO:0004672 molecular_function] (1); protein phosphorylation [GO:0006468 biological_process] (1)                                                                                                                                                   | Protein kinase, ATP binding site [IPRO17411] (1); Serine/threonine-protein kinase, active site [IPRO0571] (1); Serine/threonine/dual specificity protein kinase, catalytic domain [IPRO02290] (1); Protein kinase domain [IPRO00719] (1); Protein kinase-like domain [IPRO11009] (1)                                                                                                                                        |                              | C_uni98_00891_mRNA_1.1     | -                           |
| GF0039287 | 0                         | 1                       | 0                        | Hypothetical protein (1)                                                                                          |                                                                                                                                                                                                                                                                                                                             |                                                                                                                                                                                                                                                                                                                                                                                                                             |                              | C_uni98_00890_mRNA_7.1     | -                           |
| GF0039286 | 0                         | 1                       | 0                        | Hypothetical protein (1)                                                                                          |                                                                                                                                                                                                                                                                                                                             |                                                                                                                                                                                                                                                                                                                                                                                                                             |                              | C_uni98_00890_mRNA_3.1     | -                           |
| GF0039285 | 0                         | 1                       | 0                        | Hypothetical protein (1)                                                                                          |                                                                                                                                                                                                                                                                                                                             |                                                                                                                                                                                                                                                                                                                                                                                                                             |                              | C_uni98_00890_mRNA_19.1    | -                           |
| GF0039284 | 0                         | 1                       | 0                        | Hypothetical protein (1)                                                                                          |                                                                                                                                                                                                                                                                                                                             | Domain of unknown function DUF4219 [IPRO2514] (1)                                                                                                                                                                                                                                                                                                                                                                           |                              | C_uni98_00890_mRNA_18.1    | -                           |
| GF0039283 | 0                         | 1                       | 0                        | Hypothetical protein (1)                                                                                          |                                                                                                                                                                                                                                                                                                                             | Viral movement protein [IPRO28919] (1)                                                                                                                                                                                                                                                                                                                                                                                      |                              | C_uni98_00890_mRNA_15.1    | -                           |
| GF0039282 | 0                         | 1                       | 0                        | Hypothetical protein (1)                                                                                          |                                                                                                                                                                                                                                                                                                                             |                                                                                                                                                                                                                                                                                                                                                                                                                             |                              | C_uni98_00890_mRNA_14.1    | -                           |
| GF0039281 | 0                         | 1                       | 0                        | Hypothetical protein (1)                                                                                          |                                                                                                                                                                                                                                                                                                                             | Ribosomal protein L5 domain [IPRO2303] (1); Ribosomal protein L5, N-terminal [IPRO031310] (1)                                                                                                                                                                                                                                                                                                                               |                              | C_uni98_00889_mRNA_1.1     | -                           |
| GF0039280 | 0                         | 1                       | 0                        | Hypothetical protein (1)                                                                                          | amino acid transmembrane transporter activity [GO:0045171 molecular_function] (1); amino acid transmembrane transport [GO:0003333 biological_process] (1); membrane [GO:0016020 cellular_component] (1)                                                                                                                     | Amino acid/polyamine transporter I [IPRO02293] (1)                                                                                                                                                                                                                                                                                                                                                                          |                              | C_uni98_00888_mRNA_7.1     | -                           |
| GF0039279 | 0                         | 1                       | 0                        | Hypothetical protein (1)                                                                                          | protein binding [GO:0005515 molecular_function] (1)                                                                                                                                                                                                                                                                         | Leucine-rich repeat domain, L domain-like [IPRO2675] (1); Leucine-rich repeat, typical subtype [IPRO0591] (1); Leucine-rich repeat [IPRO01611] (1)                                                                                                                                                                                                                                                                          |                              | C_uni98_00888_mRNA_5.1     | -                           |
| GF0039278 | 0                         | 1                       | 0                        | Hypothetical protein (1)                                                                                          |                                                                                                                                                                                                                                                                                                                             |                                                                                                                                                                                                                                                                                                                                                                                                                             |                              | C_uni98_00888_mRNA_2.1     | -                           |
| GF0039277 | 0                         | 1                       | 0                        | Hypothetical protein (1)                                                                                          |                                                                                                                                                                                                                                                                                                                             |                                                                                                                                                                                                                                                                                                                                                                                                                             |                              | C_uni98_00888_mRNA_11.1    | -                           |
| GF0039276 | 0                         | 1                       | 0                        | Legumin (1)                                                                                                       | peptidase activity [GO:0008233 molecular_function] (1); proteolysis [GO:0006508 biological_process] (1)                                                                                                                                                                                                                     | Peptidase C13, legumin [IPRO01096] (1)                                                                                                                                                                                                                                                                                                                                                                                      |                              | C_uni98_00888_mRNA_1.1     | -                           |
| GF0039275 | 0                         | 1                       | 0                        | Neutral invertase like protein (1)                                                                                | catalytic activity [GO:0003824 molecular_function] (1); glycopeptide alpha-N-acetylglucosaminidase activity [GO:0039226 molecular_function] (1)                                                                                                                                                                             | Six-hairpin glycosidase-like [IPRO08928] (1); Glycoxy hydrolase family 100 [IPRO24746] (1)                                                                                                                                                                                                                                                                                                                                  |                              | C_uni98_00887_mRNA_7.1     | -                           |
| GF0039274 | 0                         | 1                       | 0                        | Hypothetical protein (1)                                                                                          | catalytic activity [GO:0003824 molecular_function] (1); glycopeptide alpha-N-acetylglucosaminidase activity [GO:0039226 molecular_function] (1)                                                                                                                                                                             | Six-hairpin glycosidase-like [IPRO08928] (1); Glycoxy hydrolase family 100 [IPRO24746] (1)                                                                                                                                                                                                                                                                                                                                  |                              | C_uni98_00887_mRNA_6.1     | -                           |
| GF0039273 | 0                         | 1                       | 0                        | Hypothetical protein (1)                                                                                          |                                                                                                                                                                                                                                                                                                                             |                                                                                                                                                                                                                                                                                                                                                                                                                             |                              | C_uni98_00887_mRNA_2.1     | -                           |
| GF0039272 | 0                         | 1                       | 0                        | Hypothetical protein (1)                                                                                          |                                                                                                                                                                                                                                                                                                                             |                                                                                                                                                                                                                                                                                                                                                                                                                             |                              | C_uni98_00886_mRNA_2.1     | -                           |
| GF0039271 | 0                         | 1                       | 0                        | Hypothetical protein (1)                                                                                          |                                                                                                                                                                                                                                                                                                                             |                                                                                                                                                                                                                                                                                                                                                                                                                             |                              | C_uni98_00886_mRNA_1.1     | -                           |
| GF0039270 | 0                         | 1                       | 0                        | Monomeric transport protein (1)                                                                                   |                                                                                                                                                                                                                                                                                                                             |                                                                                                                                                                                                                                                                                                                                                                                                                             |                              | C_uni98_00885_mRNA_3.1     | -                           |
| GF0039269 | 0                         | 1                       | 0                        | RNA-directed DNA polymerase (Reverse transcriptase) (1)                                                           | nucleic acid binding [GO:0003676 molecular_function] (1)                                                                                                                                                                                                                                                                    | Reverse transcriptase domain [IPRO04477] (1); Ribonuclease H-like domain [IPRO23271] (1)                                                                                                                                                                                                                                                                                                                                    |                              | C_uni98_00885_mRNA_13.1    | -                           |
| GF0039268 | 0                         | 1                       | 0                        | Hypothetical protein (1)                                                                                          |                                                                                                                                                                                                                                                                                                                             | Domain of unknown function DUF4283 [IPRO25588] (1)                                                                                                                                                                                                                                                                                                                                                                          |                              | C_uni98_00885_mRNA_12.1    | -                           |
| GF0039267 | 0                         | 1                       | 0                        | Hypothetical protein (1)                                                                                          |                                                                                                                                                                                                                                                                                                                             |                                                                                                                                                                                                                                                                                                                                                                                                                             |                              | C_uni98_00885_mRNA_11.1    | -                           |
| GF0039266 | 0                         | 1                       | 0                        | Hypothetical protein (1)                                                                                          | ADP binding [GO:0044531 molecular_function] (1)                                                                                                                                                                                                                                                                             | P-loop containing nucleoside triphosphate hydrolase [IPRO27417] (1); NB-ARC [IPRO02182] (1)                                                                                                                                                                                                                                                                                                                                 |                              | C_uni98_00884_mRNA_7.1     | -                           |
| GF0039265 | 0                         | 1                       | 0                        | Hypothetical protein (1)                                                                                          |                                                                                                                                                                                                                                                                                                                             |                                                                                                                                                                                                                                                                                                                                                                                                                             |                              | C_uni98_00884_mRNA_6.1     | -                           |
| GF0039264 | 0                         | 1                       | 0                        | Hypothetical protein (1)                                                                                          |                                                                                                                                                                                                                                                                                                                             |                                                                                                                                                                                                                                                                                                                                                                                                                             |                              | C_uni98_00884_mRNA_5.1     | -                           |
| GF0039263 | 0                         | 1                       | 0                        | Hypothetical protein (1)                                                                                          | ADP binding [GO:0044531 molecular_function] (1)                                                                                                                                                                                                                                                                             | P-loop containing nucleoside triphosphate hydrolase [IPRO27417] (1); AAA+ ATPase domain [IPRO05953] (1); NB-ARC [IPRO02182] (1); Leucine-rich repeat domain, L domain-like [IPRO2675] (1)                                                                                                                                                                                                                                   |                              | C_uni98_00884_mRNA_3.1     | -                           |
| GF0039262 | 0                         | 1                       | 0                        | Hypothetical protein (1)                                                                                          | ADP binding [GO:0044531 molecular_function] (1)                                                                                                                                                                                                                                                                             | AAA+ ATPase domain [IPRO05953] (1); NB-ARC [IPRO02182] (1); P-loop containing nucleoside triphosphate hydrolase [IPRO27417] (1); Leucine-rich repeat domain, L domain-like [IPRO2675] (1)                                                                                                                                                                                                                                   |                              | C_uni98_00884_mRNA_1.1     | -                           |
| GF0039261 | 0                         | 1                       | 0                        | Hypothetical protein (1)                                                                                          |                                                                                                                                                                                                                                                                                                                             |                                                                                                                                                                                                                                                                                                                                                                                                                             |                              | C_uni98_00883_mRNA_9.1     | -                           |
| GF0039260 | 0                         | 1                       | 0                        | Hypothetical protein (1)                                                                                          |                                                                                                                                                                                                                                                                                                                             |                                                                                                                                                                                                                                                                                                                                                                                                                             |                              | C_uni98_00883_mRNA_8.1     | -                           |
| GF0039259 | 0                         | 1                       | 0                        | Hypothetical protein (1)                                                                                          |                                                                                                                                                                                                                                                                                                                             |                                                                                                                                                                                                                                                                                                                                                                                                                             |                              | C_uni98_00883_mRNA_7.1     | -                           |
| GF0039258 | 0                         | 1                       | 0                        | Hypothetical protein (1)                                                                                          |                                                                                                                                                                                                                                                                                                                             |                                                                                                                                                                                                                                                                                                                                                                                                                             |                              | C_uni98_00883_mRNA_6.1     | -                           |
| GF0039257 | 0                         | 1                       | 0                        | Hypothetical protein (1)                                                                                          |                                                                                                                                                                                                                                                                                                                             | Protein argonome, N-terminal [IPRO32474] (1)                                                                                                                                                                                                                                                                                                                                                                                |                              | C_uni98_00883_mRNA_12.1    | -                           |
| GF0039256 | 0                         | 1                       | 0                        | Hypothetical protein (1)                                                                                          |                                                                                                                                                                                                                                                                                                                             |                                                                                                                                                                                                                                                                                                                                                                                                                             |                              | C_uni98_00883_mRNA_11.1    | -                           |
| GF0039255 | 0                         | 1                       | 0                        | Hypothetical protein (1)                                                                                          |                                                                                                                                                                                                                                                                                                                             |                                                                                                                                                                                                                                                                                                                                                                                                                             |                              | C_uni98_00883_mRNA_10.1    | -                           |
| GF0039254 | 0                         | 1                       | 0                        | Hypothetical protein (1)                                                                                          |                                                                                                                                                                                                                                                                                                                             |                                                                                                                                                                                                                                                                                                                                                                                                                             |                              | C_uni98_00882_mRNA_8.1     | -                           |
| GF0039253 | 0                         | 1                       | 0                        | Hypothetical protein (1)                                                                                          |                                                                                                                                                                                                                                                                                                                             |                                                                                                                                                                                                                                                                                                                                                                                                                             |                              | C_uni98_00882_mRNA_12.1    | -                           |
| GF0039252 | 0                         | 1                       | 0                        | Hypothetical protein (1)                                                                                          |                                                                                                                                                                                                                                                                                                                             |                                                                                                                                                                                                                                                                                                                                                                                                                             |                              | C_uni98_00882_mRNA_1.1     | -                           |
| GF0039251 | 0                         | 1                       | 0                        | Hypothetical protein (1)                                                                                          |                                                                                                                                                                                                                                                                                                                             |                                                                                                                                                                                                                                                                                                                                                                                                                             |                              | C_uni98_00881_mRNA_9.1     | -                           |
| GF0039250 | 0                         | 1                       | 0                        | Hypothetical protein (1)                                                                                          |                                                                                                                                                                                                                                                                                                                             |                                                                                                                                                                                                                                                                                                                                                                                                                             |                              | C_uni98_00881_mRNA_8.1     | -                           |
| GF0039249 | 0                         | 1                       | 0                        | Hypothetical protein (1)                                                                                          |                                                                                                                                                                                                                                                                                                                             | Leucine-rich repeat domain, L domain-like [IPRO2675] (1)                                                                                                                                                                                                                                                                                                                                                                    |                              | C_uni98_00881_mRNA_4.1     | -                           |
| GF0039248 | 0                         | 1                       | 0                        | Hypothetical protein (1)                                                                                          |                                                                                                                                                                                                                                                                                                                             |                                                                                                                                                                                                                                                                                                                                                                                                                             |                              | C_uni98_00881_mRNA_2.1     | -                           |
| GF0039247 | 0                         | 1                       | 0                        | Hypothetical protein (1)                                                                                          |                                                                                                                                                                                                                                                                                                                             |                                                                                                                                                                                                                                                                                                                                                                                                                             |                              | C_uni98_00880_mRNA_5.1     | -                           |
| GF0039246 | 0                         | 1                       | 0                        | Hypothetical protein (1)                                                                                          |                                                                                                                                                                                                                                                                                                                             |                                                                                                                                                                                                                                                                                                                                                                                                                             |                              | C_uni98_00880_mRNA_11.1    | -                           |
| GF0039245 | 0                         | 1                       | 0                        | Retrotransposon protein, putative, Ty3-gypsy subclass, expressed (1)                                              |                                                                                                                                                                                                                                                                                                                             | Aspartic peptidase domain [IPRO21109] (1)                                                                                                                                                                                                                                                                                                                                                                                   |                              | C_uni98_00880_mRNA_10.1    | -                           |
| GF0039244 | 0                         | 1                       | 0                        | Hypothetical protein (1)                                                                                          | GPI anchor transamidase complex [GO:0042765 cellular_component] (1); GPI anchor transamidase activity [GO:0003923 molecular_function] (1); attachment of GPI anchor to protein [GO:0010355 biological_process] (1); peptidase activity [GO:0008233 molecular_function] (1); proteolysis [GO:0006508 biological_process] (1) | Peptidase C13, legumin [IPRO01096] (1); GPI-anchor transamidase [IPRO26361] (1)                                                                                                                                                                                                                                                                                                                                             |                              | C_uni98_00879_mRNA_9.1     | -                           |
| GF0039243 | 0                         | 1                       | 0                        | Putative receptor-like protein kinase RLK1 (1)                                                                    | protein binding [GO:0005515 molecular_function] (1)                                                                                                                                                                                                                                                                         | Leucine-rich repeat domain, L domain-like [IPRO2675] (1); Malacin [IPRO1720] (1); Leucine-rich repeat [IPRO01611] (1)                                                                                                                                                                                                                                                                                                       |                              | C_uni98_00879_mRNA_8.1     | -                           |
| GF0039242 | 0                         | 1                       | 0                        | Hypothetical protein (1)                                                                                          |                                                                                                                                                                                                                                                                                                                             | Arabidopsis retrotransposon Or1 [IPRO04312] (1)                                                                                                                                                                                                                                                                                                                                                                             |                              | C_uni98_00879_mRNA_7.1     | -                           |
| GF0039241 | 0                         | 1                       | 0                        | Hypothetical protein (1)                                                                                          |                                                                                                                                                                                                                                                                                                                             |                                                                                                                                                                                                                                                                                                                                                                                                                             |                              | C_uni98_00879_mRNA_12.1    | -                           |
| GF0039240 | 0                         | 1                       | 0                        | Hypothetical protein (1)                                                                                          |                                                                                                                                                                                                                                                                                                                             |                                                                                                                                                                                                                                                                                                                                                                                                                             |                              | C_uni98_00879_mRNA_1.1     | -                           |
| GF0039239 | 0                         | 1                       | 0                        | Hypothetical protein (1)                                                                                          |                                                                                                                                                                                                                                                                                                                             |                                                                                                                                                                                                                                                                                                                                                                                                                             |                              | C_uni98_00878_mRNA_7.1     | -                           |

| ID        | Num. in C. crotchiensis | Num. in C. auris | Num. in P. putida | Name                                                        | GO                                                                                                                                                 | InterPro                                                                                                                                                                                                                                                                 | Members in C. crotchiensis | Members in C. auris     | Members in P. putida |
|-----------|-------------------------|------------------|-------------------|-------------------------------------------------------------|----------------------------------------------------------------------------------------------------------------------------------------------------|--------------------------------------------------------------------------------------------------------------------------------------------------------------------------------------------------------------------------------------------------------------------------|----------------------------|-------------------------|----------------------|
| GF0039238 | 0                       | 1                | 0                 | Hypothetical protein (1)                                    |                                                                                                                                                    |                                                                                                                                                                                                                                                                          |                            | C_uni98_00878_mRNA_5.1  |                      |
| GF0039237 | 0                       | 1                | 0                 | Hypothetical protein (1)                                    |                                                                                                                                                    |                                                                                                                                                                                                                                                                          |                            | C_uni98_00878_mRNA_4.1  |                      |
| GF0039236 | 0                       | 1                | 0                 | Hypothetical protein (1)                                    |                                                                                                                                                    |                                                                                                                                                                                                                                                                          |                            | C_uni98_00878_mRNA_3.1  |                      |
| GF0039235 | 0                       | 1                | 0                 | Hypothetical protein (1)                                    | DNA integration [GO:0015074 biological process] (1); nucleic acid binding [GO:0003676 molecular_function] (1)                                      | Aspartic peptidase domain [IPR021109] (1); Ribonuclease H-like domain [IPR013317] (1); Integrase, catalytic core [IPR001584] (1)                                                                                                                                         |                            | C_uni98_00878_mRNA_12.1 |                      |
| GF0039234 | 0                       | 1                | 0                 | Monosaccharide transporter protein (1)                      |                                                                                                                                                    |                                                                                                                                                                                                                                                                          |                            | C_uni98_00878_mRNA_10.1 |                      |
| GF0039233 | 0                       | 1                | 0                 | ABC transporter G family member 40 (1)                      | ATP binding [GO:0005524 molecular_function] (1); ATPase activity [GO:0004887 molecular_function] (1); membrane [GO:0016020 cellular_component] (1) | ABC-2 type transporter [IPR013525] (1); ABC transporter-like [IPR003439] (1); AAA- ATPase domain [IPR003593] (1); P-loop containing nucleoside triphosphate hydrolase [IPR027417] (1)                                                                                    |                            | C_uni98_00877_mRNA_8.1  |                      |
| GF0039232 | 0                       | 1                | 0                 | Pleiotropic drug resistance 1 (1)                           | ATPase activity [GO:0004887 molecular_function] (1); ATP binding [GO:0005524 molecular_function] (1)                                               | P-loop containing nucleoside triphosphate hydrolase [IPR027417] (1); AAA-ATPase domain [IPR003593] (1); ABC transporter-like [IPR003439] (1)                                                                                                                             |                            | C_uni98_00877_mRNA_6.1  |                      |
| GF0039231 | 0                       | 1                | 0                 | Hypothetical protein (1)                                    |                                                                                                                                                    |                                                                                                                                                                                                                                                                          |                            | C_uni98_00877_mRNA_4.1  |                      |
| GF0039230 | 0                       | 1                | 0                 | Hypothetical protein (1)                                    |                                                                                                                                                    |                                                                                                                                                                                                                                                                          |                            | C_uni98_00877_mRNA_18.1 |                      |
| GF0039229 | 0                       | 1                | 0                 | Hypothetical protein (1)                                    |                                                                                                                                                    |                                                                                                                                                                                                                                                                          |                            | C_uni98_00877_mRNA_14.1 |                      |
| GF0039228 | 0                       | 1                | 0                 | Hypothetical protein (1)                                    | ADP binding [GO:0042531 molecular_function] (1)                                                                                                    | P-loop containing nucleoside triphosphate hydrolase [IPR027417] (1); NB-ARC [IPR002182] (1); Leucine-rich repeat domain, I domain-like [IPR026755] (1)                                                                                                                   |                            | C_uni98_00877_mRNA_12.1 |                      |
| GF0039227 | 0                       | 1                | 0                 | Hypothetical protein (1)                                    |                                                                                                                                                    |                                                                                                                                                                                                                                                                          |                            | C_uni98_00877_mRNA_11.1 |                      |
| GF0039226 | 0                       | 1                | 0                 | Hypothetical protein (1)                                    |                                                                                                                                                    |                                                                                                                                                                                                                                                                          |                            | C_uni98_00876_mRNA_8.1  |                      |
| GF0039225 | 0                       | 1                | 0                 | Hypothetical protein (1)                                    |                                                                                                                                                    |                                                                                                                                                                                                                                                                          |                            | C_uni98_00876_mRNA_7.1  |                      |
| GF0039224 | 0                       | 1                | 0                 | Hypothetical protein (1)                                    |                                                                                                                                                    |                                                                                                                                                                                                                                                                          |                            | C_uni98_00876_mRNA_5.1  |                      |
| GF0039223 | 0                       | 1                | 0                 | ABC transporter G family member 16 (1)                      | membrane [GO:0016020 cellular_component] (1)                                                                                                       | ABC-2 type transporter [IPR013525] (1)                                                                                                                                                                                                                                   |                            | C_uni98_00876_mRNA_4.1  |                      |
| GF0039222 | 0                       | 1                | 0                 | Hypothetical protein (1)                                    | zinc ion binding [GO:0008270 molecular_function] (1)                                                                                               | Zinc finger, GRF-type [IPR010666] (1)                                                                                                                                                                                                                                    |                            | C_uni98_00876_mRNA_3.1  |                      |
| GF0039221 | 0                       | 1                | 0                 | Hypothetical protein (1)                                    |                                                                                                                                                    |                                                                                                                                                                                                                                                                          |                            | C_uni98_00876_mRNA_10.1 |                      |
| GF0039220 | 0                       | 1                | 0                 | Hypothetical protein (1)                                    |                                                                                                                                                    |                                                                                                                                                                                                                                                                          |                            | C_uni98_00876_mRNA_1.1  |                      |
| GF0039219 | 0                       | 1                | 0                 | Caffeic acid O-methyltransferase (1)                        | O-methyltransferase activity [GO:0008171 molecular_function] (1); methyltransferase activity [GO:0008168 molecular_function] (1)                   | S-adenosyl-L-methionine-dependent methyltransferase [IPR029063] (1); O-methyltransferase COMET-type [IPR016461] (1); MULE nupurposome domain [IPR018289] (1); C-methyltransferase, family 2 [IPR001077] (1)                                                              |                            | C_uni98_00875_mRNA_3.2  |                      |
| GF0039218 | 0                       | 1                | 0                 | Hypothetical protein (1)                                    |                                                                                                                                                    |                                                                                                                                                                                                                                                                          |                            | C_uni98_00875_mRNA_10.1 |                      |
| GF0039217 | 0                       | 1                | 0                 | Hypothetical protein (1)                                    |                                                                                                                                                    |                                                                                                                                                                                                                                                                          |                            | C_uni98_00875_mRNA_1.1  |                      |
| GF0039216 | 0                       | 1                | 0                 | Hypothetical protein (1)                                    |                                                                                                                                                    |                                                                                                                                                                                                                                                                          |                            | C_uni98_00874_mRNA_1.1  |                      |
| GF0039215 | 0                       | 1                | 0                 | Retrotransposon protein, putative, Ty1-copia subclass (1)   | zinc ion binding [GO:0008270 molecular_function] (1); nucleic acid binding [GO:0003676 molecular_function] (1)                                     | Zinc finger, CCHC-type [IPR001878] (1)                                                                                                                                                                                                                                   |                            | C_uni98_00873_mRNA_9.1  |                      |
| GF0039214 | 0                       | 1                | 0                 | Disease resistance protein RPS2, putative (1)               | ADP binding [GO:0042531 molecular_function] (1)                                                                                                    | Leucine-rich repeat domain, I domain-like [IPR026755] (1); NB-ARC [IPR002182] (1); P-loop containing nucleoside triphosphate hydrolase [IPR027417] (1)                                                                                                                   |                            | C_uni98_00873_mRNA_7.1  |                      |
| GF0039213 | 0                       | 1                | 0                 | Hypothetical protein (1)                                    |                                                                                                                                                    |                                                                                                                                                                                                                                                                          |                            | C_uni98_00873_mRNA_6.1  |                      |
| GF0039212 | 0                       | 1                | 0                 | Disease resistance protein RPS2 (1)                         |                                                                                                                                                    | Leucine-rich repeat domain, I domain-like [IPR026755] (1)                                                                                                                                                                                                                |                            | C_uni98_00873_mRNA_4.1  |                      |
| GF0039211 | 0                       | 1                | 0                 | Hypothetical protein (1)                                    |                                                                                                                                                    |                                                                                                                                                                                                                                                                          |                            | C_uni98_00873_mRNA_12.1 |                      |
| GF0039210 | 0                       | 1                | 0                 | Hypothetical protein (1)                                    |                                                                                                                                                    |                                                                                                                                                                                                                                                                          |                            | C_uni98_00873_mRNA_11.1 |                      |
| GF0039209 | 0                       | 1                | 0                 | Hypothetical protein (1)                                    |                                                                                                                                                    |                                                                                                                                                                                                                                                                          |                            | C_uni98_00873_mRNA_10.1 |                      |
| GF0039208 | 0                       | 1                | 0                 | Hypothetical protein (1)                                    |                                                                                                                                                    | Phosphotransferase-like [IPR029057] (1)                                                                                                                                                                                                                                  |                            | C_uni98_00873_mRNA_1.1  |                      |
| GF0039207 | 0                       | 1                | 0                 | Hypothetical protein (1)                                    | nucleic acid binding [GO:0003676 molecular_function] (1); protein dimerization activity [GO:0046983 molecular_function] (1)                        | Ribonuclease H-like domain [IPR012337] (1); HAT, C-terminal dimerization domain [IPR009063] (1)                                                                                                                                                                          |                            | C_uni98_00872_mRNA_9.1  |                      |
| GF0039206 | 0                       | 1                | 0                 | Terpene cyclase/mutase family member (1)                    |                                                                                                                                                    | Terpenoid cyclase/protein prenyltransferase alpha-alpha toroid [IPR008930] (1); Squalene cyclase, N-terminal [IPR026971] (1)                                                                                                                                             |                            | C_uni98_00872_mRNA_8.1  |                      |
| GF0039205 | 0                       | 1                | 0                 | Terpene cyclase/mutase family member (1)                    | intramolecular transferase activity [GO:0016866 molecular_function] (1)                                                                            | Terpenoid cyclase/protein prenyltransferase alpha-alpha toroid [IPR008930] (1); Squalene cyclase, C-terminal [IPR026969] (1); Squalene cyclase, N-terminal [IPR026971] (1); Squalene cyclase [IPR018333] (1)                                                             |                            | C_uni98_00872_mRNA_6.1  |                      |
| GF0039204 | 0                       | 1                | 0                 | Hypothetical protein (1)                                    |                                                                                                                                                    |                                                                                                                                                                                                                                                                          |                            | C_uni98_00871_mRNA_7.1  |                      |
| GF0039203 | 0                       | 1                | 0                 | Hypothetical protein (1)                                    |                                                                                                                                                    |                                                                                                                                                                                                                                                                          |                            | C_uni98_00871_mRNA_6.1  |                      |
| GF0039202 | 0                       | 1                | 0                 | Hypothetical protein (1)                                    |                                                                                                                                                    | Viral movement protein [IPR028919] (1)                                                                                                                                                                                                                                   |                            | C_uni98_00871_mRNA_35.1 |                      |
| GF0039201 | 0                       | 1                | 0                 | Hypothetical protein (1)                                    |                                                                                                                                                    |                                                                                                                                                                                                                                                                          |                            | C_uni98_00871_mRNA_34.1 |                      |
| GF0039200 | 0                       | 1                | 0                 | Hypothetical protein (1)                                    |                                                                                                                                                    | Viral movement protein [IPR028919] (1)                                                                                                                                                                                                                                   |                            | C_uni98_00871_mRNA_31.1 |                      |
| GF0039199 | 0                       | 1                | 0                 | Hypothetical protein (1)                                    |                                                                                                                                                    |                                                                                                                                                                                                                                                                          |                            | C_uni98_00871_mRNA_30.1 |                      |
| GF0039198 | 0                       | 1                | 0                 | Hypothetical protein (1)                                    |                                                                                                                                                    |                                                                                                                                                                                                                                                                          |                            | C_uni98_00871_mRNA_26.1 |                      |
| GF0039197 | 0                       | 1                | 0                 | Hypothetical protein (1)                                    |                                                                                                                                                    | Viral movement protein [IPR028919] (1)                                                                                                                                                                                                                                   |                            | C_uni98_00871_mRNA_20.1 |                      |
| GF0039196 | 0                       | 1                | 0                 | Hypothetical protein (1)                                    |                                                                                                                                                    |                                                                                                                                                                                                                                                                          |                            | C_uni98_00871_mRNA_2.1  |                      |
| GF0039195 | 0                       | 1                | 0                 | Hypothetical protein (1)                                    |                                                                                                                                                    |                                                                                                                                                                                                                                                                          |                            | C_uni98_00871_mRNA_18.1 |                      |
| GF0039194 | 0                       | 1                | 0                 | Hypothetical protein (1)                                    |                                                                                                                                                    | Viral movement protein [IPR028919] (1)                                                                                                                                                                                                                                   |                            | C_uni98_00871_mRNA_17.1 |                      |
| GF0039193 | 0                       | 1                | 0                 | Hypothetical protein (1)                                    |                                                                                                                                                    |                                                                                                                                                                                                                                                                          |                            | C_uni98_00871_mRNA_16.1 |                      |
| GF0039192 | 0                       | 1                | 0                 | Hypothetical protein (1)                                    |                                                                                                                                                    |                                                                                                                                                                                                                                                                          |                            | C_uni98_00871_mRNA_14.1 |                      |
| GF0039191 | 0                       | 1                | 0                 | Hypothetical protein (1)                                    |                                                                                                                                                    |                                                                                                                                                                                                                                                                          |                            | C_uni98_00871_mRNA_12.1 |                      |
| GF0039190 | 0                       | 1                | 0                 | Hypothetical protein (1)                                    |                                                                                                                                                    |                                                                                                                                                                                                                                                                          |                            | C_uni98_00871_mRNA_1.1  |                      |
| GF0039189 | 0                       | 1                | 0                 | Germin-like protein subfamily 1 member 7 (1)                | manganese ion binding [GO:0030145 molecular_function] (1); nutrient reservoir activity [GO:0045755 molecular_function] (1)                         | Cupin 1 [IPR006045] (1); Germin, manganese binding site [IPR019780] (1); Germin [IPR010129] (1); RanG-like jelly roll fold [IPR014710] (1); RanG-like cupin domain [IPR011051] (1)                                                                                       |                            | C_uni98_00870_mRNA_6.1  |                      |
| GF0039188 | 0                       | 1                | 0                 | Hypothetical protein (1)                                    |                                                                                                                                                    |                                                                                                                                                                                                                                                                          |                            | C_uni98_00870_mRNA_5.1  |                      |
| GF0039187 | 0                       | 1                | 0                 | Hypothetical protein (1)                                    |                                                                                                                                                    |                                                                                                                                                                                                                                                                          |                            | C_uni98_00870_mRNA_14.1 |                      |
| GF0039186 | 0                       | 1                | 0                 | Hypothetical protein (1)                                    |                                                                                                                                                    |                                                                                                                                                                                                                                                                          |                            | C_uni98_00869_mRNA_8.1  |                      |
| GF0039185 | 0                       | 1                | 0                 | Hypothetical protein (1)                                    | nucleic acid binding [GO:0003676 molecular_function] (1)                                                                                           | Ribonuclease H-like domain [IPR012337] (1)                                                                                                                                                                                                                               |                            | C_uni98_00869_mRNA_16.1 |                      |
| GF0039184 | 0                       | 1                | 0                 | Putative ATP-dependent helicase HRQ1 (1)                    | ATP binding [GO:0005524 molecular_function] (1); nucleic acid binding [GO:0003676 molecular_function] (1)                                          | DEAD/DEAH-box helicase, putative [IPR018973] (1); Helicase, C-terminal [IPR001650] (1); Helicase superfamily 1.2, ATP-binding domain [IPR014001] (1); DEAD/DEAH box helicase domain [IPR011545] (1); P-loop containing nucleoside triphosphate hydrolase [IPR027417] (1) |                            | C_uni98_00869_mRNA_15.1 |                      |
| GF0039183 | 0                       | 1                | 0                 | Phospholipase A1-gamma1, chloroplastic (1)                  | lipid metabolic process [GO:0006629 biological_process] (1)                                                                                        | Fungal lipase-like domain [IPR002921] (1); Alpha/Beta hydrolase fold [IPR029058] (1)                                                                                                                                                                                     |                            | C_uni98_00869_mRNA_1.1  |                      |
| GF0039182 | 0                       | 1                | 0                 | Hypothetical protein (1)                                    |                                                                                                                                                    |                                                                                                                                                                                                                                                                          |                            | C_uni98_00868_mRNA_7.1  |                      |
| GF0039181 | 0                       | 1                | 0                 | Misciculin (1)                                              | endopeptidase inhibitor activity [GO:0004866 molecular_function] (1)                                                                               | Proteinase inhibitor I3, Kunitz legume [IPR021601] (1); Kunitz inhibitor ST1-like [IPR011065] (1)                                                                                                                                                                        |                            | C_uni98_00868_mRNA_5.1  |                      |
| GF0039180 | 0                       | 1                | 0                 | Hypothetical protein (1)                                    |                                                                                                                                                    |                                                                                                                                                                                                                                                                          |                            | C_uni98_00867_mRNA_9.1  |                      |
| GF0039179 | 0                       | 1                | 0                 | Hypothetical protein (1)                                    | nucleic acid binding [GO:0003676 molecular_function] (1); DNA integration [GO:0015074 biological_process] (1)                                      | Integrase, catalytic core [IPR001584] (1); Ribonuclease H-like domain [IPR012337] (1)                                                                                                                                                                                    |                            | C_uni98_00867_mRNA_18.1 |                      |
| GF0039178 | 0                       | 1                | 0                 | Hypothetical protein (1)                                    |                                                                                                                                                    |                                                                                                                                                                                                                                                                          |                            | C_uni98_00867_mRNA_10.1 |                      |
| GF0039177 | 0                       | 1                | 0                 | Hypothetical protein (1)                                    |                                                                                                                                                    |                                                                                                                                                                                                                                                                          |                            | C_uni98_00866_mRNA_14.1 |                      |
| GF0039176 | 0                       | 1                | 0                 | Hypothetical protein (1)                                    |                                                                                                                                                    |                                                                                                                                                                                                                                                                          |                            | C_uni98_00866_mRNA_13.1 |                      |
| GF0039175 | 0                       | 1                | 0                 | UDP-glycoyltransferase 73C5 (1)                             | metabolic process [GO:0008152 biological_process] (1); transferase activity, transferring hexoyl groups [GO:0016758 molecular_function] (1)        | UDP-glycoyltransferase/UDP-glycoyltransferase [IPR002213] (1)                                                                                                                                                                                                            |                            | C_uni98_00866_mRNA_12.1 |                      |
| GF0039174 | 0                       | 1                | 0                 | Hypothetical protein (1)                                    | transferase activity, transferring hexoyl groups [GO:0016758 molecular_function] (1); metabolic process [GO:0008152 biological_process] (1)        | UDP-glycoyltransferase/UDP-glycoyltransferase [IPR002213] (1)                                                                                                                                                                                                            |                            | C_uni98_00866_mRNA_11.1 |                      |
| GF0039173 | 0                       | 1                | 0                 | Hypothetical protein (1)                                    |                                                                                                                                                    |                                                                                                                                                                                                                                                                          |                            | C_uni98_00865_mRNA_3.1  |                      |
| GF0039172 | 0                       | 1                | 0                 | Hypothetical protein (1)                                    | zinc ion binding [GO:0008270 molecular_function] (1); nucleic acid binding [GO:0003676 molecular_function] (1)                                     | Zinc finger, CCHC-type [IPR001878] (1)                                                                                                                                                                                                                                   |                            | C_uni98_00864_mRNA_5.1  |                      |
| GF0039171 | 0                       | 1                | 0                 | Hypothetical protein (1)                                    |                                                                                                                                                    |                                                                                                                                                                                                                                                                          |                            | C_uni98_00864_mRNA_4.1  |                      |
| GF0039170 | 0                       | 1                | 0                 | Hypothetical protein (1)                                    |                                                                                                                                                    | Viral movement protein [IPR028919] (1)                                                                                                                                                                                                                                   |                            | C_uni98_00864_mRNA_3.1  |                      |
| GF0039169 | 0                       | 1                | 0                 | Hypothetical protein (1)                                    |                                                                                                                                                    |                                                                                                                                                                                                                                                                          |                            | C_uni98_00864_mRNA_2.1  |                      |
| GF0039168 | 0                       | 1                | 0                 | SNF7 family protein isoform 1 (1)                           | vesicular transport [GO:0007034 biological_process] (1)                                                                                            | Snf7 family [IPR005024] (1)                                                                                                                                                                                                                                              |                            | C_uni98_00864_mRNA_16.1 |                      |
| GF0039167 | 0                       | 1                | 0                 | Hypothetical protein (1)                                    |                                                                                                                                                    |                                                                                                                                                                                                                                                                          |                            | C_uni98_00864_mRNA_12.1 |                      |
| GF0039166 | 0                       | 1                | 0                 | Hypothetical protein (1)                                    |                                                                                                                                                    |                                                                                                                                                                                                                                                                          |                            | C_uni98_00864_mRNA_1.1  |                      |
| GF0039165 | 0                       | 1                | 0                 | Hypothetical protein (1)                                    | proteolysis [GO:0006508 biological_process] (1); aspartic-type endopeptidase activity [GO:0004190 molecular_function] (1)                          | Aspartic peptidase, active site [IPR001969] (1); Aspartic peptidase domain [IPR021091] (1)                                                                                                                                                                               |                            | C_uni98_00863_mRNA_8.1  |                      |
| GF0039164 | 0                       | 1                | 0                 | Putative leucine-rich repeat disease resistance protein (1) | protein binding [GO:0005515 molecular_function] (1)                                                                                                | Leucine-rich repeat domain, I domain-like [IPR026755] (1); Leucine-rich repeat, typical subtype [IPR003591] (1); Leucine-rich repeat [IPR001611] (1)                                                                                                                     |                            | C_uni98_00863_mRNA_7.1  |                      |
| GF0039163 | 0                       | 1                | 0                 | Hypothetical protein (1)                                    |                                                                                                                                                    |                                                                                                                                                                                                                                                                          |                            | C_uni98_00863_mRNA_6.1  |                      |
| GF0039162 | 0                       | 1                | 0                 | Hypothetical protein (1)                                    |                                                                                                                                                    | Endonuclease/exonuclease/phosphatase [IPR005135] (1)                                                                                                                                                                                                                     |                            | C_uni98_00863_mRNA_22.1 |                      |
| GF0039161 | 0                       | 1                | 0                 | Hypothetical protein (1)                                    |                                                                                                                                                    |                                                                                                                                                                                                                                                                          |                            | C_uni98_00863_mRNA_21.1 |                      |
| GF0039160 | 0                       | 1                | 0                 | Hypothetical protein (1)                                    | protein binding [GO:0005515 molecular_function] (1)                                                                                                | Leucine-rich repeat [IPR001611] (1); Leucine-rich repeat domain, I domain-like [IPR026755] (1)                                                                                                                                                                           |                            | C_uni98_00863_mRNA_2.1  |                      |
| GF0039159 | 0                       | 1                | 0                 | Maturase R (1)                                              | mRNA processing [GO:0006397 biological_process] (1)                                                                                                | Domain X [IPR024937] (1)                                                                                                                                                                                                                                                 |                            | C_uni98_00863_mRNA_19.1 |                      |
| GF0039158 | 0                       | 1                | 0                 | Hypothetical protein (1)                                    |                                                                                                                                                    |                                                                                                                                                                                                                                                                          |                            | C_uni98_00863_mRNA_18.1 |                      |

| ID        | Num. in C. crottensteini | Num. in C. caudis | Num. in P. putida | Note                                                      | GO                                                                                                                                                                                                                                                                                                                 | InterPro                                                                                                                                                                                                                                                                                 | Members in C. crottensteini | Members in C. caudis     | Members in P. putida |
|-----------|--------------------------|-------------------|-------------------|-----------------------------------------------------------|--------------------------------------------------------------------------------------------------------------------------------------------------------------------------------------------------------------------------------------------------------------------------------------------------------------------|------------------------------------------------------------------------------------------------------------------------------------------------------------------------------------------------------------------------------------------------------------------------------------------|-----------------------------|--------------------------|----------------------|
| GF0039157 | 0                        | 1                 | 0                 | Hypothetical leucine rich repeat protein (5)              | protein binding [GO:0005515 molecular_function] (1)                                                                                                                                                                                                                                                                | Leucine-rich repeat domain, 1 domain-like [IPRO22675] (1); Leucine-rich repeat [IPRO1611] (1)                                                                                                                                                                                            | -                           | C_umshii_00863_mRNA_10,1 | -                    |
| GF0039156 | 0                        | 1                 | 0                 | Leucine-rich repeat disease resistance protein-like (1)   | protein binding [GO:0005515 molecular_function] (1)                                                                                                                                                                                                                                                                | Leucine-rich repeat-containing N-terminal, plant-type [IPRO1310] (1); Leucine-rich repeat [IPRO1611] (1); Leucine-rich repeat, typical subtype [IPRO3591] (1); Leucine-rich repeat domain, 1 domain-like [IPRO22675] (1)                                                                 | -                           | C_umshii_00863_mRNA_3,1  | -                    |
| GF0039155 | 0                        | 1                 | 0                 | Hypothetical protein (1)                                  | -                                                                                                                                                                                                                                                                                                                  | -                                                                                                                                                                                                                                                                                        | -                           | C_umshii_00862_mRNA_7,1  | -                    |
| GF0039154 | 0                        | 1                 | 0                 | Hypothetical protein (1)                                  | -                                                                                                                                                                                                                                                                                                                  | -                                                                                                                                                                                                                                                                                        | -                           | C_umshii_00862_mRNA_3,1  | -                    |
| GF0039153 | 0                        | 1                 | 0                 | Hypothetical protein (1)                                  | -                                                                                                                                                                                                                                                                                                                  | -                                                                                                                                                                                                                                                                                        | -                           | C_umshii_00862_mRNA_2,1  | -                    |
| GF0039152 | 0                        | 1                 | 0                 | Hypothetical protein (1)                                  | -                                                                                                                                                                                                                                                                                                                  | Aspartic peptidase domain [IPRO21109] (1)                                                                                                                                                                                                                                                | -                           | C_umshii_00862_mRNA_10,3 | -                    |
| GF0039151 | 0                        | 1                 | 0                 | Hypothetical protein (1)                                  | protein binding [GO:0005515 molecular_function] (1)                                                                                                                                                                                                                                                                | Tetranortriptide-like helical domain [IPRO11990] (1)                                                                                                                                                                                                                                     | -                           | C_umshii_00861_mRNA_5,1  | -                    |
| GF0039150 | 0                        | 1                 | 0                 | Hypothetical protein (1)                                  | -                                                                                                                                                                                                                                                                                                                  | -                                                                                                                                                                                                                                                                                        | -                           | C_umshii_00861_mRNA_11,1 | -                    |
| GF0039149 | 0                        | 1                 | 0                 | Hypothetical protein (1)                                  | -                                                                                                                                                                                                                                                                                                                  | -                                                                                                                                                                                                                                                                                        | -                           | C_umshii_00861_mRNA_10,1 | -                    |
| GF0039148 | 0                        | 1                 | 0                 | Hypothetical protein (1)                                  | -                                                                                                                                                                                                                                                                                                                  | -                                                                                                                                                                                                                                                                                        | -                           | C_umshii_00860_mRNA_3,1  | -                    |
| GF0039147 | 0                        | 1                 | 0                 | Hypothetical protein (1)                                  | -                                                                                                                                                                                                                                                                                                                  | -                                                                                                                                                                                                                                                                                        | -                           | C_umshii_00859_mRNA_6,1  | -                    |
| GF0039146 | 0                        | 1                 | 0                 | Hypothetical protein (1)                                  | -                                                                                                                                                                                                                                                                                                                  | -                                                                                                                                                                                                                                                                                        | -                           | C_umshii_00859_mRNA_5,1  | -                    |
| GF0039145 | 0                        | 1                 | 0                 | Hypothetical protein (1)                                  | -                                                                                                                                                                                                                                                                                                                  | -                                                                                                                                                                                                                                                                                        | -                           | C_umshii_00859_mRNA_3,1  | -                    |
| GF0039144 | 0                        | 1                 | 0                 | Monosaccharide transport protein (1)                      | -                                                                                                                                                                                                                                                                                                                  | -                                                                                                                                                                                                                                                                                        | -                           | C_umshii_00859_mRNA_15,1 | -                    |
| GF0039143 | 0                        | 1                 | 0                 | Hypothetical protein (1)                                  | -                                                                                                                                                                                                                                                                                                                  | -                                                                                                                                                                                                                                                                                        | -                           | C_umshii_00859_mRNA_12,1 | -                    |
| GF0039142 | 0                        | 1                 | 0                 | Hypothetical protein (1)                                  | -                                                                                                                                                                                                                                                                                                                  | -                                                                                                                                                                                                                                                                                        | -                           | C_umshii_00858_mRNA_9,1  | -                    |
| GF0039141 | 0                        | 1                 | 0                 | Hypothetical protein (1)                                  | protein kinase activity [GO:0004672 molecular_function] (1); protein phosphorylation [GO:0006468 biological_process] (1); ATP binding [GO:0005524 molecular_function] (1)                                                                                                                                          | Protein kinase domain [IPRO00719] (1); Protein kinase-like domain [IPRO11009] (1)                                                                                                                                                                                                        | -                           | C_umshii_00858_mRNA_14,1 | -                    |
| GF0039140 | 0                        | 1                 | 0                 | Hypothetical protein (1)                                  | -                                                                                                                                                                                                                                                                                                                  | -                                                                                                                                                                                                                                                                                        | -                           | C_umshii_00858_mRNA_12,3 | -                    |
| GF0039139 | 0                        | 1                 | 0                 | Hypothetical protein (1)                                  | -                                                                                                                                                                                                                                                                                                                  | Protein of unknown function DJP966 [IPRO10369] (1)                                                                                                                                                                                                                                       | -                           | C_umshii_00858_mRNA_1,1  | -                    |
| GF0039138 | 0                        | 1                 | 0                 | Hypothetical protein (1)                                  | hydro-lyase activity [GO:0016836 molecular_function] (1)                                                                                                                                                                                                                                                           | Enoyl-CoA hydratase/isomerase, HbYL-CoA-H type [IPRO32259] (1); Cup/ovonase-like domain [IPRO29645] (1)                                                                                                                                                                                  | -                           | C_umshii_00857_mRNA_3,1  | -                    |
| GF0039137 | 0                        | 1                 | 0                 | Hypothetical protein (1)                                  | -                                                                                                                                                                                                                                                                                                                  | -                                                                                                                                                                                                                                                                                        | -                           | C_umshii_00857_mRNA_13,1 | -                    |
| GF0039136 | 0                        | 1                 | 0                 | Hypothetical protein (1)                                  | -                                                                                                                                                                                                                                                                                                                  | -                                                                                                                                                                                                                                                                                        | -                           | C_umshii_00856_mRNA_7,1  | -                    |
| GF0039135 | 0                        | 1                 | 0                 | Hypothetical protein (1)                                  | -                                                                                                                                                                                                                                                                                                                  | -                                                                                                                                                                                                                                                                                        | -                           | C_umshii_00856_mRNA_6,1  | -                    |
| GF0039134 | 0                        | 1                 | 0                 | Hypothetical protein (1)                                  | -                                                                                                                                                                                                                                                                                                                  | -                                                                                                                                                                                                                                                                                        | -                           | C_umshii_00856_mRNA_5,1  | -                    |
| GF0039133 | 0                        | 1                 | 0                 | Monoglyceride lipase (1)                                  | -                                                                                                                                                                                                                                                                                                                  | Scrine aminopeptidase, S33 [IPRO22742] (1); Alpha/Beta hydrolase fold [IPRO29188] (1)                                                                                                                                                                                                    | -                           | C_umshii_00856_mRNA_4,1  | -                    |
| GF0039132 | 0                        | 1                 | 0                 | Hypothetical protein (1)                                  | -                                                                                                                                                                                                                                                                                                                  | -                                                                                                                                                                                                                                                                                        | -                           | C_umshii_00856_mRNA_13,1 | -                    |
| GF0039131 | 0                        | 1                 | 0                 | Hypothetical protein (1)                                  | -                                                                                                                                                                                                                                                                                                                  | -                                                                                                                                                                                                                                                                                        | -                           | C_umshii_00856_mRNA_11,1 | -                    |
| GF0039130 | 0                        | 1                 | 0                 | Hypothetical protein (1)                                  | -                                                                                                                                                                                                                                                                                                                  | -                                                                                                                                                                                                                                                                                        | -                           | C_umshii_00856_mRNA_1,1  | -                    |
| GF0039129 | 0                        | 1                 | 0                 | Ribulose biphosphate carboxylase small chain (1)          | -                                                                                                                                                                                                                                                                                                                  | Ribulose biphosphate carboxylase, small chain [IPRO3469] (1); Ribulose biphosphate carboxylase small chain domain [IPRO00894] (1)                                                                                                                                                        | -                           | C_umshii_00855_mRNA_6,1  | -                    |
| GF0039128 | 0                        | 1                 | 0                 | Hypothetical protein (1)                                  | -                                                                                                                                                                                                                                                                                                                  | -                                                                                                                                                                                                                                                                                        | -                           | C_umshii_00855_mRNA_4,1  | -                    |
| GF0039127 | 0                        | 1                 | 0                 | Cytochrome P450 protein (1)                               | iron ion binding [GO:0005506 molecular_function] (1); heme binding [GO:0020307 molecular_function] (1); oxidoreductase activity, acting on paired donors, with incorporation or reduction of molecular oxygen [GO:0016705 molecular_function] (1); oxidation-reduction process [GO:0005514 biological_process] (1) | Zinc finger, RING-FYVE/PHD-type [IPRO13083] (1); Zinc finger, RING-type [IPRO1841] (1)                                                                                                                                                                                                   | -                           | C_umshii_00854_mRNA_4,1  | -                    |
| GF0039126 | 0                        | 1                 | 0                 | E3 ubiquitin-protein ligase RHAZA (1)                     | protein binding [GO:0005515 molecular_function] (1); zinc ion binding [GO:0008270 molecular_function] (1)                                                                                                                                                                                                          | Zinc finger, RING-FYVE/PHD-type [IPRO13083] (1); Zinc finger, RING-type [IPRO1841] (1)                                                                                                                                                                                                   | -                           | C_umshii_00854_mRNA_17,1 | -                    |
| GF0039125 | 0                        | 1                 | 0                 | Hypothetical protein (1)                                  | -                                                                                                                                                                                                                                                                                                                  | -                                                                                                                                                                                                                                                                                        | -                           | C_umshii_00854_mRNA_14,1 | -                    |
| GF0039124 | 0                        | 1                 | 0                 | Hypothetical protein (1)                                  | metalloendopeptidase activity [GO:0004222 molecular_function] (1); proteolysis [GO:0006508 biological_process] (1); metalloproteinase activity [GO:0008237 molecular_function] (1)                                                                                                                                 | Peptidase M3AM3H [IPRO01507] (1); Metalloproteinase, catalytic domain [IPRO24079] (1)                                                                                                                                                                                                    | -                           | C_umshii_00853_mRNA_2,1  | -                    |
| GF0039123 | 0                        | 1                 | 0                 | Hypothetical protein (1)                                  | -                                                                                                                                                                                                                                                                                                                  | -                                                                                                                                                                                                                                                                                        | -                           | C_umshii_00853_mRNA_12,1 | -                    |
| GF0039122 | 0                        | 1                 | 0                 | Hypothetical protein (1)                                  | -                                                                                                                                                                                                                                                                                                                  | -                                                                                                                                                                                                                                                                                        | -                           | C_umshii_00852_mRNA_6,1  | -                    |
| GF0039121 | 0                        | 1                 | 0                 | Hypothetical protein (1)                                  | -                                                                                                                                                                                                                                                                                                                  | Retroransposon gag domain [IPRO05162] (1)                                                                                                                                                                                                                                                | -                           | C_umshii_00852_mRNA_5,1  | -                    |
| GF0039120 | 0                        | 1                 | 0                 | Putative retrotransposon pol polyprotein (1)              | -                                                                                                                                                                                                                                                                                                                  | -                                                                                                                                                                                                                                                                                        | -                           | C_umshii_00852_mRNA_4,1  | -                    |
| GF0039119 | 0                        | 1                 | 0                 | Hypothetical protein (1)                                  | -                                                                                                                                                                                                                                                                                                                  | -                                                                                                                                                                                                                                                                                        | -                           | C_umshii_00852_mRNA_24,1 | -                    |
| GF0039118 | 0                        | 1                 | 0                 | Hypothetical protein (1)                                  | ADP binding [GO:0043531 molecular_function] (1)                                                                                                                                                                                                                                                                    | NB-ARC [IPRO02182] (1); P-loop containing nucleoside triphosphate hydrolase [IPRO27417] (1); Leucine-rich repeat domain, 1 domain-like [IPRO22675] (1)                                                                                                                                   | -                           | C_umshii_00852_mRNA_20,1 | -                    |
| GF0039117 | 0                        | 1                 | 0                 | Disease resistance protein (1)                            | ADP binding [GO:0043531 molecular_function] (1)                                                                                                                                                                                                                                                                    | P-loop containing nucleoside triphosphate hydrolase [IPRO27417] (1); NB-ARC [IPRO02182] (1)                                                                                                                                                                                              | -                           | C_umshii_00852_mRNA_18,1 | -                    |
| GF0039116 | 0                        | 1                 | 0                 | Hypothetical protein (1)                                  | -                                                                                                                                                                                                                                                                                                                  | -                                                                                                                                                                                                                                                                                        | -                           | C_umshii_00852_mRNA_16,1 | -                    |
| GF0039115 | 0                        | 1                 | 0                 | Hypothetical protein (1)                                  | -                                                                                                                                                                                                                                                                                                                  | -                                                                                                                                                                                                                                                                                        | -                           | C_umshii_00852_mRNA_15,1 | -                    |
| GF0039114 | 0                        | 1                 | 0                 | CDNA clone002-110-H12, full insert sequence (1)           | nucleic acid binding [GO:0003676 molecular_function] (1)                                                                                                                                                                                                                                                           | Ribonuclease H-like domain [IPRO12337] (1)                                                                                                                                                                                                                                               | -                           | C_umshii_00851_mRNA_7,1  | -                    |
| GF0039113 | 0                        | 1                 | 0                 | Hypothetical protein (1)                                  | -                                                                                                                                                                                                                                                                                                                  | -                                                                                                                                                                                                                                                                                        | -                           | C_umshii_00851_mRNA_6,1  | -                    |
| GF0039112 | 0                        | 1                 | 0                 | Retrotransposon protein, putative, Ty1-copia subclass (1) | -                                                                                                                                                                                                                                                                                                                  | Retroransposon protein, putative, Ty1-copia subclass (1)                                                                                                                                                                                                                                 | -                           | C_umshii_00851_mRNA_4,1  | -                    |
| GF0039111 | 0                        | 1                 | 0                 | Hypothetical protein (1)                                  | nucleic acid binding [GO:0003676 molecular_function] (1); zinc ion binding [GO:0008270 molecular_function] (1)                                                                                                                                                                                                     | Zinc finger, CCHC-type [IPRO01878] (1)                                                                                                                                                                                                                                                   | -                           | C_umshii_00851_mRNA_3,1  | -                    |
| GF0039110 | 0                        | 1                 | 0                 | Alpha,alpha-trehalase (1)                                 | catalytic activity [GO:0003824 molecular_function] (1); trehalase metabolic process [GO:0006999 biological_process] (1); alpha,alpha-trehalase activity [GO:0004555 molecular_function] (1)                                                                                                                        | Glycoside hydrolase, family 37, conserved site [IPRO12322] (1); Six-hairpin glycosylase-like [IPRO08028] (1); Glycoside hydrolase, family 37 [IPRO01661] (1)                                                                                                                             | -                           | C_umshii_00850_mRNA_3,1  | -                    |
| GF0039109 | 0                        | 1                 | 0                 | MFS transporter (1)                                       | major facilitator superfamily transporter activity [GO:0015098 molecular_function] (1); integral component of membrane [GO:0016021 cellular_component] (1); myofibrin ion transport [GO:0015049 biological_process] (1)                                                                                            | Major facilitator superfamily domain [IPRO2846] (1); Myofibrin-ion transporter [IPRO08509] (1)                                                                                                                                                                                           | -                           | C_umshii_00850_mRNA_19,1 | -                    |
| GF0039108 | 0                        | 1                 | 0                 | Hypothetical protein (1)                                  | protein binding [GO:0005515 molecular_function] (1)                                                                                                                                                                                                                                                                | Ubiquitin-related domain [IPRO29071] (1); UBX-like domain [IPRO10121] (1)                                                                                                                                                                                                                | -                           | C_umshii_00850_mRNA_12,1 | -                    |
| GF0039107 | 0                        | 1                 | 0                 | Hypothetical protein (1)                                  | -                                                                                                                                                                                                                                                                                                                  | Domain of unknown function DJF1605 [IPRO11709] (1)                                                                                                                                                                                                                                       | -                           | C_umshii_00850_mRNA_1,1  | -                    |
| GF0039106 | 0                        | 1                 | 0                 | Hypothetical protein (1)                                  | oxidoreductase activity, acting on paired donors, with incorporation or reduction of molecular oxygen [GO:0016705 molecular_function] (1); oxidation-reduction process [GO:0005514 biological_process] (1); heme binding [GO:0008270 molecular_function] (1); iron ion binding [GO:0005506 molecular_function] (1) | Cytochrome P450 [IPRO1128] (1)                                                                                                                                                                                                                                                           | -                           | C_umshii_00849_mRNA_6,1  | -                    |
| GF0039105 | 0                        | 1                 | 0                 | Hypothetical protein (1)                                  | -                                                                                                                                                                                                                                                                                                                  | -                                                                                                                                                                                                                                                                                        | -                           | C_umshii_00849_mRNA_20,1 | -                    |
| GF0039104 | 0                        | 1                 | 0                 | Hypothetical protein (1)                                  | protein kinase activity [GO:0004672 molecular_function] (1); protein phosphorylation [GO:0006468 biological_process] (1); ATP binding [GO:0005524 molecular_function] (1)                                                                                                                                          | Protein kinase domain [IPRO00719] (1); Protein kinase-like domain [IPRO11009] (1)                                                                                                                                                                                                        | -                           | C_umshii_00849_mRNA_16,1 | -                    |
| GF0039103 | 0                        | 1                 | 0                 | Hypothetical protein (1)                                  | iron ion binding [GO:0005506 molecular_function] (1); heme binding [GO:0020307 molecular_function] (1); oxidoreductase activity, acting on paired donors, with incorporation or reduction of molecular oxygen [GO:0016705 molecular_function] (1)                                                                  | Cytochrome P450 [IPRO1128] (1)                                                                                                                                                                                                                                                           | -                           | C_umshii_00849_mRNA_1,1  | -                    |
| GF0039102 | 0                        | 1                 | 0                 | Hypothetical protein (1)                                  | integral component of membrane [GO:0016021 cellular_component] (1); nucleotide binding [GO:0001666 molecular_function] (1)                                                                                                                                                                                         | P-type ATPase, transmembrane domain [IPRO23298] (1); P-type ATPase, cytoplasmic domain N [IPRO22399] (1); P-type ATPase [IPRO01757] (1); HAD-like domain [IPRO23214] (1)                                                                                                                 | -                           | C_umshii_00848_mRNA_8,1  | -                    |
| GF0039101 | 0                        | 1                 | 0                 | Hypothetical protein (1)                                  | -                                                                                                                                                                                                                                                                                                                  | -                                                                                                                                                                                                                                                                                        | -                           | C_umshii_00848_mRNA_2,1  | -                    |
| GF0039100 | 0                        | 1                 | 0                 | UDP-glucose protein transglucosylase (1)                  | intramolecular transference activity [GO:0016866 molecular_function] (1); cellular biosynthetic process [GO:0032544 biological_process] (1)                                                                                                                                                                        | Reversibly glycosylated polypeptide family [IPRO04901] (1)                                                                                                                                                                                                                               | -                           | C_umshii_00847_mRNA_12,1 | -                    |
| GF0039099 | 0                        | 1                 | 0                 | Hypothetical protein (1)                                  | -                                                                                                                                                                                                                                                                                                                  | -                                                                                                                                                                                                                                                                                        | -                           | C_umshii_00847_mRNA_1,1  | -                    |
| GF0039098 | 0                        | 1                 | 0                 | Hypothetical protein (1)                                  | transmembrane transport [GO:0055085 biological_process] (1)                                                                                                                                                                                                                                                        | Oligopeptide transporter, OPT superfamily [IPRO04813] (1)                                                                                                                                                                                                                                | -                           | C_umshii_00846_mRNA_15,1 | -                    |
| GF0039097 | 0                        | 1                 | 0                 | Endoglycanase (1)                                         | carbohydrate metabolic process [GO:0005975 biological_process] (1); catalytic activity [GO:0003824 molecular_function] (1); hydrolase activity, hydrolyzing O-glycosyl compounds [GO:0004555 molecular_function] (1)                                                                                               | Six-hairpin glycosylase [IPRO12341] (1); Six-hairpin glycosylase-like [IPRO08028] (1); Glycosyl hydrolases family 9, Asp/Glu-active sites [IPRO3126] (1); Glycoside hydrolase family 9 [IPRO01701] (1)                                                                                   | -                           | C_umshii_00845_mRNA_13,1 | -                    |
| GF0039096 | 0                        | 1                 | 0                 | Hypothetical protein (1)                                  | pyridoxal phosphate binding [GO:0030170 molecular_function] (1); catalytic activity [GO:0003824 molecular_function] (1); biosynthetic process [GO:0009058 biological_process] (1)                                                                                                                                  | Pyridoxal phosphate-dependent transiferase, major region, subdomain 1 [IPRO15421] (1); Alpha erythrin/Hsp20 domain [IPRO02068] (1); HSP20-like chaperone [IPRO0879] (1); Aminotransferase, class I, class II [IPRO08439] (1); Pyridoxal phosphate-dependent transiferase [IPRO15424] (1) | -                           | C_umshii_00844_mRNA_9,1  | -                    |
| GF0039095 | 0                        | 1                 | 0                 | Hypothetical protein (1)                                  | -                                                                                                                                                                                                                                                                                                                  | -                                                                                                                                                                                                                                                                                        | -                           | C_umshii_00844_mRNA_4,1  | -                    |
| GF0039094 | 0                        | 1                 | 0                 | Hypothetical protein (1)                                  | -                                                                                                                                                                                                                                                                                                                  | -                                                                                                                                                                                                                                                                                        | -                           | C_umshii_00844_mRNA_3,1  | -                    |
| GF0039093 | 0                        | 1                 | 0                 | Hypothetical protein (1)                                  | -                                                                                                                                                                                                                                                                                                                  | -                                                                                                                                                                                                                                                                                        | -                           | C_umshii_00844_mRNA_16,1 | -                    |

| ID       | Num. in C. crottensteii | Num. in C. auris | Num. in P. putida | Note                                                                  | GO                                                                                                                                                                                                                                                                                                                                                                                                                                                                                                    | InterPro                                                                                                                                                                                                                                                                                                                                                                                                                                                                                                    | Members in C. crottensteii | Members in C. auris    | Members in P. putida |
|----------|-------------------------|------------------|-------------------|-----------------------------------------------------------------------|-------------------------------------------------------------------------------------------------------------------------------------------------------------------------------------------------------------------------------------------------------------------------------------------------------------------------------------------------------------------------------------------------------------------------------------------------------------------------------------------------------|-------------------------------------------------------------------------------------------------------------------------------------------------------------------------------------------------------------------------------------------------------------------------------------------------------------------------------------------------------------------------------------------------------------------------------------------------------------------------------------------------------------|----------------------------|------------------------|----------------------|
| GF003992 | 0                       | 1                | 0                 | Hypothetical protein (1)                                              |                                                                                                                                                                                                                                                                                                                                                                                                                                                                                                       |                                                                                                                                                                                                                                                                                                                                                                                                                                                                                                             |                            | C_ushii_0844_mRNA_14.1 |                      |
| GF003991 | 0                       | 1                | 0                 | Hypothetical protein (1)                                              | nucleic acid binding [GO:0003676]<br>molecular_function (1)                                                                                                                                                                                                                                                                                                                                                                                                                                           | Ribonuclease H-like domain [IPR012337] (1);<br>Endonuclease/exonuclease/phosphatase [IPR005135] (1)                                                                                                                                                                                                                                                                                                                                                                                                         |                            | C_ushii_0844_mRNA_13.1 |                      |
| GF003990 | 0                       | 1                | 0                 | Phosphopyruvate hydratase (1)                                         | magnesium ion binding [GO:0002347]<br>molecular_function (1); phosphopyruvate hydratase activity [GO:0004634]<br>molecular_function (1); glycolytic process [GO:0006966]<br>biological_process (1); phosphopyruvate hydratase complex [GO:0000015]<br>cellular_component (1)                                                                                                                                                                                                                          | Enolase, conserved site [IPR020809] (1);<br>Enolase [IPR000941] (1); Enolase C-terminal domain-like [IPR029005] (1);<br>Enolase, C-terminal [IPR020810] (1)                                                                                                                                                                                                                                                                                                                                                 |                            | C_ushii_0843_mRNA_14.3 |                      |
| GF003989 | 0                       | 1                | 0                 | Hypothetical protein (1)                                              | protein binding [GO:0005515]<br>molecular_function (1)                                                                                                                                                                                                                                                                                                                                                                                                                                                | PAZ domain [IPR003100] (1); Argonaut, glycine-rich domain [IPR024375] (1);<br>Protein argonaut, N-terminal [IPR024743] (1)                                                                                                                                                                                                                                                                                                                                                                                  |                            | C_ushii_0841_mRNA_6.1  |                      |
| GF003988 | 0                       | 1                | 0                 | Hypothetical protein (1)                                              |                                                                                                                                                                                                                                                                                                                                                                                                                                                                                                       |                                                                                                                                                                                                                                                                                                                                                                                                                                                                                                             |                            | C_ushii_0841_mRNA_10.1 |                      |
| GF003987 | 0                       | 1                | 0                 | Hypothetical protein (1)                                              |                                                                                                                                                                                                                                                                                                                                                                                                                                                                                                       |                                                                                                                                                                                                                                                                                                                                                                                                                                                                                                             |                            | C_ushii_0841_mRNA_1.1  |                      |
| GF003986 | 0                       | 1                | 0                 | Hypothetical protein (1)                                              |                                                                                                                                                                                                                                                                                                                                                                                                                                                                                                       |                                                                                                                                                                                                                                                                                                                                                                                                                                                                                                             |                            | C_ushii_0840_mRNA_6.1  |                      |
| GF003985 | 0                       | 1                | 0                 | Hypothetical protein (1)                                              |                                                                                                                                                                                                                                                                                                                                                                                                                                                                                                       |                                                                                                                                                                                                                                                                                                                                                                                                                                                                                                             |                            | C_ushii_0840_mRNA_5.1  |                      |
| GF003984 | 0                       | 1                | 0                 | Hypothetical protein (1)                                              |                                                                                                                                                                                                                                                                                                                                                                                                                                                                                                       |                                                                                                                                                                                                                                                                                                                                                                                                                                                                                                             |                            | C_ushii_0840_mRNA_4.1  |                      |
| GF003983 | 0                       | 1                | 0                 | Hypothetical protein (1)                                              | nucleic acid binding [GO:0003676]<br>molecular_function (1)                                                                                                                                                                                                                                                                                                                                                                                                                                           | Ribonuclease H-like domain [IPR012337] (1)                                                                                                                                                                                                                                                                                                                                                                                                                                                                  |                            | C_ushii_0840_mRNA_2.1  |                      |
| GF003982 | 0                       | 1                | 0                 | Hypothetical protein (1)                                              |                                                                                                                                                                                                                                                                                                                                                                                                                                                                                                       |                                                                                                                                                                                                                                                                                                                                                                                                                                                                                                             |                            | C_ushii_0839_mRNA_9.1  |                      |
| GF003981 | 0                       | 1                | 0                 | Hypothetical protein (1)                                              |                                                                                                                                                                                                                                                                                                                                                                                                                                                                                                       |                                                                                                                                                                                                                                                                                                                                                                                                                                                                                                             |                            | C_ushii_0839_mRNA_7.1  |                      |
| GF003980 | 0                       | 1                | 0                 | Hypothetical protein (1)                                              |                                                                                                                                                                                                                                                                                                                                                                                                                                                                                                       | Endonuclease/exonuclease/phosphatase [IPR005135] (1);<br>Rab-GTPase/TBC domain [IPR000195] (1)                                                                                                                                                                                                                                                                                                                                                                                                              |                            | C_ushii_0839_mRNA_3.1  |                      |
| GF003979 | 0                       | 1                | 0                 | Hypothetical protein (1)                                              |                                                                                                                                                                                                                                                                                                                                                                                                                                                                                                       |                                                                                                                                                                                                                                                                                                                                                                                                                                                                                                             |                            | C_ushii_0839_mRNA_14.1 |                      |
| GF003978 | 0                       | 1                | 0                 | Hypothetical protein (1)                                              |                                                                                                                                                                                                                                                                                                                                                                                                                                                                                                       | Rant-stimulus gap domain [IPR005162] (1)                                                                                                                                                                                                                                                                                                                                                                                                                                                                    |                            | C_ushii_0839_mRNA_11.1 |                      |
| GF003977 | 0                       | 1                | 0                 | Hypothetical protein (1)                                              |                                                                                                                                                                                                                                                                                                                                                                                                                                                                                                       |                                                                                                                                                                                                                                                                                                                                                                                                                                                                                                             |                            | C_ushii_0839_mRNA_10.1 |                      |
| GF003976 | 0                       | 1                | 0                 | Disease resistance protein (TIR-NBS-LRR class) (1)                    | signal transduction [GO:0007165]<br>biological_process (1); ATP binding [GO:0043531]<br>molecular_function (1); protein binding [GO:0005515]<br>molecular_function (1)<br>iron ion binding [GO:0005506]<br>molecular_function (1); heme binding [GO:0002037]<br>molecular_function (1); oxidoreductase activity, acting on paired donors, with incorporation or reduction of molecular oxygen [GO:0016765]<br>molecular_function (1); oxidant-reduction process [GO:005114]<br>biological_process (1) | Toll-interleukin-1 receptor homology (TIR) domain [IPR018171] (1); P-loop containing nucleoside triphosphate hydrolase [IPR027417] (1); NB-ARC [IPR001821] (1)                                                                                                                                                                                                                                                                                                                                              |                            | C_ushii_0839_mRNA_1.1  |                      |
| GF003975 | 0                       | 1                | 0                 | Cytochrome P450 7B3A3 (1)                                             |                                                                                                                                                                                                                                                                                                                                                                                                                                                                                                       | Cytochrome P450, C-class, group I [IPR020401] (1); Cytochrome P450, conserved site [IPR017972] (1);<br>Cytochrome P450 [IPR001120] (1)                                                                                                                                                                                                                                                                                                                                                                      |                            | C_ushii_0838_mRNA_12.1 |                      |
| GF003974 | 0                       | 1                | 0                 | Hypothetical protein (1)                                              |                                                                                                                                                                                                                                                                                                                                                                                                                                                                                                       |                                                                                                                                                                                                                                                                                                                                                                                                                                                                                                             |                            | C_ushii_0837_mRNA_5.1  |                      |
| GF003973 | 0                       | 1                | 0                 | Hypothetical protein (1)                                              | nucleic acid binding [GO:0003676]<br>molecular_function (1)                                                                                                                                                                                                                                                                                                                                                                                                                                           | Ribonuclease H-like domain [IPR012337] (1)                                                                                                                                                                                                                                                                                                                                                                                                                                                                  |                            | C_ushii_0836_mRNA_9.1  |                      |
| GF003972 | 0                       | 1                | 0                 | Hypothetical protein (1)                                              |                                                                                                                                                                                                                                                                                                                                                                                                                                                                                                       |                                                                                                                                                                                                                                                                                                                                                                                                                                                                                                             |                            | C_ushii_0836_mRNA_4.1  |                      |
| GF003971 | 0                       | 1                | 0                 | LRR receptor-like serine/threonine-protein kinase (CSO) (1)           | protein binding [GO:0005515]<br>molecular_function (1)                                                                                                                                                                                                                                                                                                                                                                                                                                                | Leucine-rich repeat [IPR016111] (1);<br>Peptidase M28 [IPR007863] (1); Leucine-rich repeat domain, L domain-like [IPR026751] (1); Leucine-rich repeat, typical subtype [IPR003591] (1)                                                                                                                                                                                                                                                                                                                      |                            | C_ushii_0836_mRNA_12.1 |                      |
| GF003970 | 0                       | 1                | 0                 | Gamma-glutamyl hydrolase 2 (1)                                        | glutamine metabolic process [GO:0006541]<br>biological_process (1); omega peptidase activity [GO:0006242]<br>molecular_function (1); hydrolase activity [GO:0016787]<br>molecular_function (1); catalytic activity [GO:0003824]<br>molecular_function (1)                                                                                                                                                                                                                                             | Class I glutamine amidotransferase-like [IPR029623] (1); Peptidase C26 [IPR011697] (1); Peptidase C26, gamma-glutamyl hydrolase [IPR015277] (1)                                                                                                                                                                                                                                                                                                                                                             |                            | C_ushii_0836_mRNA_1.1  |                      |
| GF003969 | 0                       | 1                | 0                 | MADS-box transcription factor family protein (1)                      | DNA binding [GO:0003677]<br>molecular_function (1); protein dimerization activity [GO:0046983]<br>molecular_function (1)<br>racemase and epimerase activity, acting on carbohydrates and derivatives [GO:0016857]<br>molecular_function (1); metabolic process [GO:0008152]<br>biological_process (1); catalytic activity [GO:0003824]<br>molecular_function (1); carbohydrate metabolic process [GO:0005975]<br>biological_process (1)                                                               | Transcription factor, MADS-box [IPR002100] (1)                                                                                                                                                                                                                                                                                                                                                                                                                                                              |                            | C_ushii_0835_mRNA_3.1  |                      |
| GF003968 | 0                       | 1                | 0                 | Hypothetical protein (1)                                              |                                                                                                                                                                                                                                                                                                                                                                                                                                                                                                       | Alcohol-type TIM barrel [IPR013785] (1); Ribulose-phosphate binding barrel [IPR011660] (1); Ribulose-phosphate 3-epimerase-like [IPR000056] (1)                                                                                                                                                                                                                                                                                                                                                             |                            | C_ushii_0835_mRNA_10.1 |                      |
| GF003967 | 0                       | 1                | 0                 | Hypothetical protein (1)                                              |                                                                                                                                                                                                                                                                                                                                                                                                                                                                                                       |                                                                                                                                                                                                                                                                                                                                                                                                                                                                                                             |                            | C_ushii_0834_mRNA_4.1  |                      |
| GF003966 | 0                       | 1                | 0                 | Pentatricopeptide repeat-containing protein, chloroplast (1)          |                                                                                                                                                                                                                                                                                                                                                                                                                                                                                                       | Pentatricopeptide repeat [IPR028855] (1)                                                                                                                                                                                                                                                                                                                                                                                                                                                                    |                            | C_ushii_0834_mRNA_2.1  |                      |
| GF003965 | 0                       | 1                | 0                 | Hypothetical protein (1)                                              |                                                                                                                                                                                                                                                                                                                                                                                                                                                                                                       |                                                                                                                                                                                                                                                                                                                                                                                                                                                                                                             |                            | C_ushii_0832_mRNA_4.1  |                      |
| GF003964 | 0                       | 1                | 0                 | Zinc finger protein ZAT11 (1)                                         | metal ion binding [GO:0046872]<br>molecular_function (1)                                                                                                                                                                                                                                                                                                                                                                                                                                              | Zinc finger, C2H2 [IPR007087] (1); Zinc finger, C2H2-like [IPR015880] (1)                                                                                                                                                                                                                                                                                                                                                                                                                                   |                            | C_ushii_0832_mRNA_22.1 |                      |
| GF003963 | 0                       | 1                | 0                 | Hypothetical protein (1)                                              |                                                                                                                                                                                                                                                                                                                                                                                                                                                                                                       |                                                                                                                                                                                                                                                                                                                                                                                                                                                                                                             |                            | C_ushii_0831_mRNA_7.1  |                      |
| GF003962 | 0                       | 1                | 0                 | Progesterone 5-beta-reductase (1)                                     |                                                                                                                                                                                                                                                                                                                                                                                                                                                                                                       | NAD(P)-binding domain [IPR016400] (1)                                                                                                                                                                                                                                                                                                                                                                                                                                                                       |                            | C_ushii_0831_mRNA_4.1  |                      |
| GF003961 | 0                       | 1                | 0                 | Hypothetical protein (1)                                              |                                                                                                                                                                                                                                                                                                                                                                                                                                                                                                       |                                                                                                                                                                                                                                                                                                                                                                                                                                                                                                             |                            | C_ushii_0831_mRNA_14.1 |                      |
| GF003960 | 0                       | 1                | 0                 | BURP domain-containing protein (1)                                    |                                                                                                                                                                                                                                                                                                                                                                                                                                                                                                       | BURP domain [IPR004873] (1)                                                                                                                                                                                                                                                                                                                                                                                                                                                                                 |                            | C_ushii_0831_mRNA_13.1 |                      |
| GF003959 | 0                       | 1                | 0                 | Putative leucine-rich repeat disease resistance protein (1)           | protein binding [GO:0005515]<br>molecular_function (1)                                                                                                                                                                                                                                                                                                                                                                                                                                                | Leucine-rich repeat, typical subtype [IPR003591] (1);<br>Leucine-rich repeat domain, L domain-like [IPR016111] (1);<br>Transposon, En3pm-like [IPR004242] (1)                                                                                                                                                                                                                                                                                                                                               |                            | C_ushii_0830_mRNA_9.1  |                      |
| GF003958 | 0                       | 1                | 0                 | Transposase family top2, putative (1)                                 |                                                                                                                                                                                                                                                                                                                                                                                                                                                                                                       |                                                                                                                                                                                                                                                                                                                                                                                                                                                                                                             |                            | C_ushii_0830_mRNA_8.1  |                      |
| GF003957 | 0                       | 1                | 0                 | Hypothetical protein (1)                                              |                                                                                                                                                                                                                                                                                                                                                                                                                                                                                                       |                                                                                                                                                                                                                                                                                                                                                                                                                                                                                                             |                            | C_ushii_0830_mRNA_6.1  |                      |
| GF003956 | 0                       | 1                | 0                 | Hypothetical protein (1)                                              |                                                                                                                                                                                                                                                                                                                                                                                                                                                                                                       |                                                                                                                                                                                                                                                                                                                                                                                                                                                                                                             |                            | C_ushii_0830_mRNA_4.1  |                      |
| GF003955 | 0                       | 1                | 0                 | Hypothetical protein (1)                                              |                                                                                                                                                                                                                                                                                                                                                                                                                                                                                                       |                                                                                                                                                                                                                                                                                                                                                                                                                                                                                                             |                            | C_ushii_0830_mRNA_20.1 |                      |
| GF003954 | 0                       | 1                | 0                 | Truncated verticillium with resistance-like protein (1)               | protein binding [GO:0005515]<br>molecular_function (1)                                                                                                                                                                                                                                                                                                                                                                                                                                                | Leucine-rich repeat [IPR016111] (1);<br>Leucine-rich repeat domain, L domain-like [IPR026751] (1)                                                                                                                                                                                                                                                                                                                                                                                                           |                            | C_ushii_0830_mRNA_2.1  |                      |
| GF003953 | 0                       | 1                | 0                 | Hypothetical protein (1)                                              |                                                                                                                                                                                                                                                                                                                                                                                                                                                                                                       |                                                                                                                                                                                                                                                                                                                                                                                                                                                                                                             |                            | C_ushii_0830_mRNA_16.1 |                      |
| GF003952 | 0                       | 1                | 0                 | Nascent polypeptide-associated complex subunit alpha-like protein (1) |                                                                                                                                                                                                                                                                                                                                                                                                                                                                                                       | Nascent polypeptide associated complex NAC domain [IPR027151] (1); Nascent polypeptide-associated complex subunit alpha [IPR016641] (1)                                                                                                                                                                                                                                                                                                                                                                     |                            | C_ushii_0830_mRNA_13.1 |                      |
| GF003951 | 0                       | 1                | 0                 | Hypothetical protein (1)                                              |                                                                                                                                                                                                                                                                                                                                                                                                                                                                                                       |                                                                                                                                                                                                                                                                                                                                                                                                                                                                                                             |                            | C_ushii_0830_mRNA_10.1 |                      |
| GF003950 | 0                       | 1                | 0                 | Hypothetical protein (1)                                              |                                                                                                                                                                                                                                                                                                                                                                                                                                                                                                       |                                                                                                                                                                                                                                                                                                                                                                                                                                                                                                             |                            | C_ushii_0829_mRNA_8.1  |                      |
| GF003949 | 0                       | 1                | 0                 | Caffeic acid 3-O-methyltransferase (1)                                | O-methyltransferase activity [GO:0008171]<br>molecular_function (1); methyltransferase activity [GO:0008168]<br>molecular_function (1)                                                                                                                                                                                                                                                                                                                                                                | S-adenosyl-L-methionine-dependent methyltransferase [IPR029063] (1); O-methyltransferase COMT-type [IPR016461] (1); O-methyltransferase, family 2 [IPR010771] (1)                                                                                                                                                                                                                                                                                                                                           |                            | C_ushii_0829_mRNA_7.1  |                      |
| GF003948 | 0                       | 1                | 0                 | Caffeic acid 3-O-methyltransferase (1)                                | protein dimerization activity [GO:0046983]<br>molecular_function (1); O-methyltransferase activity [GO:0008171]<br>molecular_function (1); methyltransferase activity [GO:0008168]<br>molecular_function (1)                                                                                                                                                                                                                                                                                          | S-adenosyl-L-methionine-dependent methyltransferase [IPR029063] (1); O-methyltransferase, family 2 [IPR010771] (1); Winged helix-helix-DNA-binding domain [IPR015991] (1); Plant methyltransferase dimerization [IPR012967] (1); O-methyltransferase COMT-type [IPR016461] (1);<br>S-adenosyl-L-methionine-dependent methyltransferase [IPR029063] (1); Winged helix-helix-DNA-binding domain [IPR015991] (1); O-methyltransferase, family 2 [IPR010771] (1); O-methyltransferase COMT-type [IPR016461] (1) |                            | C_ushii_0829_mRNA_6.1  |                      |
| GF003947 | 0                       | 1                | 0                 | Tricin 3',4',5'-O-trimethyltransferase (1)                            | O-methyltransferase activity [GO:0008171]<br>molecular_function (1); methyltransferase activity [GO:0008168]<br>molecular_function (1)                                                                                                                                                                                                                                                                                                                                                                | S-adenosyl-L-methionine-dependent methyltransferase [IPR029063] (1); Winged helix-helix-DNA-binding domain [IPR015991] (1); O-methyltransferase, family 2 [IPR010771] (1); O-methyltransferase COMT-type [IPR016461] (1)                                                                                                                                                                                                                                                                                    |                            | C_ushii_0829_mRNA_4.1  |                      |
| GF003946 | 0                       | 1                | 0                 | Hypothetical protein (1)                                              |                                                                                                                                                                                                                                                                                                                                                                                                                                                                                                       |                                                                                                                                                                                                                                                                                                                                                                                                                                                                                                             |                            | C_ushii_0829_mRNA_3.1  |                      |
| GF003945 | 0                       | 1                | 0                 | Hypothetical protein (1)                                              |                                                                                                                                                                                                                                                                                                                                                                                                                                                                                                       |                                                                                                                                                                                                                                                                                                                                                                                                                                                                                                             |                            | C_ushii_0829_mRNA_10.1 |                      |
| GF003944 | 0                       | 1                | 0                 | Hypothetical protein (1)                                              |                                                                                                                                                                                                                                                                                                                                                                                                                                                                                                       |                                                                                                                                                                                                                                                                                                                                                                                                                                                                                                             |                            | C_ushii_0828_mRNA_2.1  |                      |
| GF003943 | 0                       | 1                | 0                 | Hypothetical protein (1)                                              |                                                                                                                                                                                                                                                                                                                                                                                                                                                                                                       |                                                                                                                                                                                                                                                                                                                                                                                                                                                                                                             |                            | C_ushii_0828_mRNA_14.1 |                      |
| GF003942 | 0                       | 1                | 0                 | Hypothetical protein (1)                                              |                                                                                                                                                                                                                                                                                                                                                                                                                                                                                                       |                                                                                                                                                                                                                                                                                                                                                                                                                                                                                                             |                            | C_ushii_0827_mRNA_15.1 |                      |
| GF003941 | 0                       | 1                | 0                 | Hypothetical protein (1)                                              |                                                                                                                                                                                                                                                                                                                                                                                                                                                                                                       |                                                                                                                                                                                                                                                                                                                                                                                                                                                                                                             |                            | C_ushii_0826_mRNA_7.1  |                      |
| GF003940 | 0                       | 1                | 0                 | Hypothetical protein (1)                                              |                                                                                                                                                                                                                                                                                                                                                                                                                                                                                                       |                                                                                                                                                                                                                                                                                                                                                                                                                                                                                                             |                            | C_ushii_0826_mRNA_6.1  |                      |
| GF003939 | 0                       | 1                | 0                 | Hypothetical protein (1)                                              | polysaccharide binding [GO:0030247]<br>molecular_function (1)                                                                                                                                                                                                                                                                                                                                                                                                                                         | Wall-associated receptor kinase, galacturonate-binding domain [IPR025287] (1); EGF-like, conserved site [IPR013022] (1)<br>Retroviral aspartyl protease [IPR013242] (1)                                                                                                                                                                                                                                                                                                                                     |                            | C_ushii_0826_mRNA_5.1  |                      |
| GF003938 | 0                       | 1                | 0                 | Hypothetical protein (1)                                              |                                                                                                                                                                                                                                                                                                                                                                                                                                                                                                       |                                                                                                                                                                                                                                                                                                                                                                                                                                                                                                             |                            | C_ushii_0826_mRNA_2.1  |                      |
| GF003937 | 0                       | 1                | 0                 | Cytosine-rich BLK 34, putative isoform 1 (1)                          | chain catabolic process [GO:0006032]<br>biological_process (1); hydrolase activity, hydrolyzing O-glycosyl compounds [GO:0004553]<br>molecular_function (1); carbohydrate metabolic process [GO:0005975]<br>biological_process (1); chitinase activity [GO:0004866]<br>molecular_function (1)                                                                                                                                                                                                         | Concanavalin A-like lectin/glycanase domain [IPR013220] (1); Glycoside hydrolase, catalytic domain [IPR013781] (1); Glycoside hydrolase superfamily [IPR017853] (1); Chitinase II [IPR011583] (1); Glycoside hydrolase family 18, catalytic domain [IPR001223] (1)                                                                                                                                                                                                                                          |                            | C_ushii_0826_mRNA_19.1 |                      |
| GF003936 | 0                       | 1                | 0                 | Hypothetical protein (1)                                              | carbohydrate metabolic process [GO:0005975]<br>biological_process (1); hydrolase activity, hydrolyzing O-glycosyl compounds [GO:0004553]<br>molecular_function (1)                                                                                                                                                                                                                                                                                                                                    | Glycoside hydrolase superfamily [IPR017853] (1); Glycoside hydrolase, catalytic domain [IPR013781] (1); Glycoside hydrolase family 18, catalytic domain [IPR001223] (1)                                                                                                                                                                                                                                                                                                                                     |                            | C_ushii_0826_mRNA_17.1 |                      |
| GF003935 | 0                       | 1                | 0                 | Hypothetical protein (1)                                              |                                                                                                                                                                                                                                                                                                                                                                                                                                                                                                       |                                                                                                                                                                                                                                                                                                                                                                                                                                                                                                             |                            | C_ushii_0826_mRNA_14.1 |                      |
| GF003934 | 0                       | 1                | 0                 | Hypothetical protein (1)                                              | lipid metabolic process [GO:0006629]<br>biological_process (1); hydrolase activity, acting on ester bonds [GO:0016788]<br>molecular_function (1); lipase activity [GO:0016298]<br>molecular_function (1)                                                                                                                                                                                                                                                                                              | SGNH hydrolase-type esterase domain [IPR013830] (1); GDSL lipase/esterase [IPR001087] (1); Lipase, GDSL, active site [IPR008263] (1)                                                                                                                                                                                                                                                                                                                                                                        |                            | C_ushii_0826_mRNA_12.1 |                      |
| GF003933 | 0                       | 1                | 0                 | Hypothetical protein (1)                                              |                                                                                                                                                                                                                                                                                                                                                                                                                                                                                                       |                                                                                                                                                                                                                                                                                                                                                                                                                                                                                                             |                            | C_ushii_0826_mRNA_1.1  |                      |
| GF003932 | 0                       | 1                | 0                 | Hypothetical protein (1)                                              |                                                                                                                                                                                                                                                                                                                                                                                                                                                                                                       |                                                                                                                                                                                                                                                                                                                                                                                                                                                                                                             |                            | C_ushii_0825_mRNA_3.1  |                      |
| GF003931 | 0                       | 1                | 0                 | Hypothetical protein (1)                                              |                                                                                                                                                                                                                                                                                                                                                                                                                                                                                                       |                                                                                                                                                                                                                                                                                                                                                                                                                                                                                                             |                            | C_ushii_0825_mRNA_2.1  |                      |
| GF003930 | 0                       | 1                | 0                 | Hypothetical protein (1)                                              |                                                                                                                                                                                                                                                                                                                                                                                                                                                                                                       |                                                                                                                                                                                                                                                                                                                                                                                                                                                                                                             |                            | C_ushii_0825_mRNA_15.1 |                      |
| GF003929 | 0                       | 1                | 0                 | Hypothetical protein (1)                                              |                                                                                                                                                                                                                                                                                                                                                                                                                                                                                                       |                                                                                                                                                                                                                                                                                                                                                                                                                                                                                                             |                            | C_ushii_0824_mRNA_8.1  |                      |
| GF003928 | 0                       | 1                | 0                 | Hypothetical protein (1)                                              | integral component of membrane [GO:0016021]<br>cellular_component (1); prenyltransferase activity [GO:0004659]<br>molecular_function (1)                                                                                                                                                                                                                                                                                                                                                              | USA prenyltransferase family [IPR000371] (1)                                                                                                                                                                                                                                                                                                                                                                                                                                                                |                            | C_ushii_0824_mRNA_8.1  |                      |

| ID        | Num. in C. crottenstei | Num. in C. auris | Num. in P. putida | Note                                                                            | GO                                                                                                                                                                                                                                                                                                                                                                        | InterPro                                                                                                                                                                                                                                                                                                                     | Members in C. crottenstei | Members in C. auris      | Members in P. putida |
|-----------|------------------------|------------------|-------------------|---------------------------------------------------------------------------------|---------------------------------------------------------------------------------------------------------------------------------------------------------------------------------------------------------------------------------------------------------------------------------------------------------------------------------------------------------------------------|------------------------------------------------------------------------------------------------------------------------------------------------------------------------------------------------------------------------------------------------------------------------------------------------------------------------------|---------------------------|--------------------------|----------------------|
| GF0039027 | 0                      | 1                | 0                 | Hypothetical protein (1)                                                        |                                                                                                                                                                                                                                                                                                                                                                           | Domain of unknown function DUF1985 [IPR015410] (1)                                                                                                                                                                                                                                                                           | -                         | C_unihir_00824_mRNA_1.1  | -                    |
| GF0039026 | 0                      | 1                | 0                 | Hypothetical protein (1)                                                        |                                                                                                                                                                                                                                                                                                                                                                           | -                                                                                                                                                                                                                                                                                                                            | -                         | C_unihir_00823_mRNA_9.1  | -                    |
| GF0039025 | 0                      | 1                | 0                 | Hypothetical protein (1)                                                        |                                                                                                                                                                                                                                                                                                                                                                           | -                                                                                                                                                                                                                                                                                                                            | -                         | C_unihir_00823_mRNA_8.1  | -                    |
| GF0039024 | 0                      | 1                | 0                 | Hypothetical protein (1)                                                        |                                                                                                                                                                                                                                                                                                                                                                           | -                                                                                                                                                                                                                                                                                                                            | -                         | C_unihir_00823_mRNA_2.1  | -                    |
| GF0039023 | 0                      | 1                | 0                 | Hypothetical protein (1)                                                        |                                                                                                                                                                                                                                                                                                                                                                           | -                                                                                                                                                                                                                                                                                                                            | -                         | C_unihir_00823_mRNA_13.1 | -                    |
| GF0039022 | 0                      | 1                | 0                 | Hypothetical protein (1)                                                        |                                                                                                                                                                                                                                                                                                                                                                           | -                                                                                                                                                                                                                                                                                                                            | -                         | C_unihir_00823_mRNA_12.1 | -                    |
| GF0039021 | 0                      | 1                | 0                 | Systemin receptor SR160, putative (1)                                           | protein phosphorylation [GO:0006468 biological_process] (1); protein kinase activity [GO:0004672 molecular_function] (1); ATP binding [GO:0005524 molecular_function] (1)                                                                                                                                                                                                 | Serine/threonine/tyrosine protein kinase catalytic domain [IPR001245] (1); Protein kinase domain [IPR000719] (1); Protein kinase-like domain [IPR011099] (1)                                                                                                                                                                 | -                         | C_unihir_00822_mRNA_9.1  | -                    |
| GF0039020 | 0                      | 1                | 0                 | Monoaccharide transport protein (1)                                             |                                                                                                                                                                                                                                                                                                                                                                           | -                                                                                                                                                                                                                                                                                                                            | -                         | C_unihir_00822_mRNA_14.1 | -                    |
| GF0039019 | 0                      | 1                | 0                 | Hypothetical protein (1)                                                        |                                                                                                                                                                                                                                                                                                                                                                           | -                                                                                                                                                                                                                                                                                                                            | -                         | C_unihir_00821_mRNA_9.1  | -                    |
| GF0039018 | 0                      | 1                | 0                 | Hypothetical protein (1)                                                        |                                                                                                                                                                                                                                                                                                                                                                           | -                                                                                                                                                                                                                                                                                                                            | -                         | C_unihir_00821_mRNA_7.1  | -                    |
| GF0039017 | 0                      | 1                | 0                 | Hypothetical protein (1)                                                        | protein binding [GO:0005515 molecular_function] (1)                                                                                                                                                                                                                                                                                                                       | Tetrapeptide-like helical domain [IPR011900] (1); Tetrapeptide repeat [IPR019734] (1); Tetrapeptide repeat-containing domain [IPR013026] (1)                                                                                                                                                                                 | -                         | C_unihir_00821_mRNA_2.1  | -                    |
| GF0039016 | 0                      | 1                | 0                 | Hypothetical protein (1)                                                        |                                                                                                                                                                                                                                                                                                                                                                           | -                                                                                                                                                                                                                                                                                                                            | -                         | C_unihir_00821_mRNA_16.1 | -                    |
| GF0039015 | 0                      | 1                | 0                 | Hypothetical protein (1)                                                        |                                                                                                                                                                                                                                                                                                                                                                           | -                                                                                                                                                                                                                                                                                                                            | -                         | C_unihir_00821_mRNA_15.1 | -                    |
| GF0039014 | 0                      | 1                | 0                 | Hypothetical protein (1)                                                        |                                                                                                                                                                                                                                                                                                                                                                           | -                                                                                                                                                                                                                                                                                                                            | -                         | C_unihir_00821_mRNA_14.1 | -                    |
| GF0039013 | 0                      | 1                | 0                 | Hypothetical protein (1)                                                        |                                                                                                                                                                                                                                                                                                                                                                           | -                                                                                                                                                                                                                                                                                                                            | -                         | C_unihir_00821_mRNA_1.1  | -                    |
| GF0039012 | 0                      | 1                | 0                 | TBC1 domain family member 15 (1)                                                |                                                                                                                                                                                                                                                                                                                                                                           | Rab-GTPase-TBC domain [IPR000195] (1)                                                                                                                                                                                                                                                                                        | -                         | C_unihir_00820_mRNA_14.1 | -                    |
| GF0039011 | 0                      | 1                | 0                 | 60S ribosomal protein L14 (1)                                                   | ribosome [GO:0005540 cellular_component] (1); translation [GO:0006412 biological_process] (1); intracellular [GO:0009652 cellular_component] (1); structural constituent of ribosome [GO:0003735 molecular_function] (1)                                                                                                                                                  | Ribosomal protein L14 [IPR002784] (1)                                                                                                                                                                                                                                                                                        | -                         | C_unihir_00820_mRNA_13.1 | -                    |
| GF0039010 | 0                      | 1                | 0                 | Hypothetical protein (1)                                                        |                                                                                                                                                                                                                                                                                                                                                                           | Leucine-rich repeat domain, I domain-like [IPR026275] (1)                                                                                                                                                                                                                                                                    | -                         | C_unihir_00819_mRNA_5.1  | -                    |
| GF0039009 | 0                      | 1                | 0                 | Transposase tap2 (1)                                                            |                                                                                                                                                                                                                                                                                                                                                                           | Transposon, En-Spm-like [IPR004242] (1)                                                                                                                                                                                                                                                                                      | -                         | C_unihir_00819_mRNA_1.1  | -                    |
| GF0039008 | 0                      | 1                | 0                 | Disease resistance protein RPS2 (1)                                             | protein binding [GO:0005515 molecular_function] (1)                                                                                                                                                                                                                                                                                                                       | Leucine-rich repeat domain, I domain-like [IPR026275] (1)                                                                                                                                                                                                                                                                    | -                         | C_unihir_00818_mRNA_9.1  | -                    |
| GF0039007 | 0                      | 1                | 0                 | Hypothetical protein (1)                                                        |                                                                                                                                                                                                                                                                                                                                                                           | -                                                                                                                                                                                                                                                                                                                            | -                         | C_unihir_00818_mRNA_7.1  | -                    |
| GF0039006 | 0                      | 1                | 0                 | Hypothetical protein (1)                                                        |                                                                                                                                                                                                                                                                                                                                                                           | -                                                                                                                                                                                                                                                                                                                            | -                         | C_unihir_00818_mRNA_5.1  | -                    |
| GF0039005 | 0                      | 1                | 0                 | Hypothetical protein (1)                                                        |                                                                                                                                                                                                                                                                                                                                                                           | -                                                                                                                                                                                                                                                                                                                            | -                         | C_unihir_00818_mRNA_4.1  | -                    |
| GF0039004 | 0                      | 1                | 0                 | Hypothetical protein (1)                                                        | metabolic process [GO:0008152 biological_process] (1); hydrolase activity [GO:0003877 molecular_function] (1)                                                                                                                                                                                                                                                             | Alpha/beta hydrolase fold [IPR029058] (1); Alpha/beta hydrolase fold-3 [IPR013094] (1)                                                                                                                                                                                                                                       | -                         | C_unihir_00818_mRNA_3.1  | -                    |
| GF0039003 | 0                      | 1                | 0                 | Hypothetical protein (1)                                                        | zinc ion binding [GO:0008270 molecular_function] (1); nucleic acid binding [GO:0003676 molecular_function] (1)                                                                                                                                                                                                                                                            | Zinc finger, CCHC-type [IPR001878] (1)                                                                                                                                                                                                                                                                                       | -                         | C_unihir_00818_mRNA_10.1 | -                    |
| GF0039002 | 0                      | 1                | 0                 | Hypothetical protein (1)                                                        |                                                                                                                                                                                                                                                                                                                                                                           | -                                                                                                                                                                                                                                                                                                                            | -                         | C_unihir_00818_mRNA_1.1  | -                    |
| GF0039001 | 0                      | 1                | 0                 | Flavin containing monooxygenase YUCCA10-like protein (1)                        | N,N-dimethylamine monooxygenase activity [GO:0004899 molecular_function] (1); NADP binding [GO:0050661 molecular_function] (1); oxidoreductase activity [GO:0016491 molecular_function] (1); oxidation-reduction process [GO:0055114 biological_process] (1); flavin adenine dinucleotide binding [GO:0050660 molecular_function] (1)                                     | Flavin monooxygenase FMO [IPR009660] (1); FAD/NADP-binding domain [IPR023753] (1); Flavin monooxygenase-like [IPR029946] (1)                                                                                                                                                                                                 | -                         | C_unihir_00817_mRNA_6.1  | -                    |
| GF0039000 | 0                      | 1                | 0                 | Hypothetical protein (1)                                                        |                                                                                                                                                                                                                                                                                                                                                                           | -                                                                                                                                                                                                                                                                                                                            | -                         | C_unihir_00817_mRNA_12.1 | -                    |
| GF0038999 | 0                      | 1                | 0                 | Hypothetical protein (1)                                                        |                                                                                                                                                                                                                                                                                                                                                                           | -                                                                                                                                                                                                                                                                                                                            | -                         | C_unihir_00817_mRNA_1.1  | -                    |
| GF0038998 | 0                      | 1                | 0                 | Hypothetical protein (1)                                                        |                                                                                                                                                                                                                                                                                                                                                                           | Viral movement protein [IPR028919] (1)                                                                                                                                                                                                                                                                                       | -                         | C_unihir_00816_mRNA_9.1  | -                    |
| GF0038997 | 0                      | 1                | 0                 | Hypothetical protein (1)                                                        |                                                                                                                                                                                                                                                                                                                                                                           | -                                                                                                                                                                                                                                                                                                                            | -                         | C_unihir_00816_mRNA_8.1  | -                    |
| GF0038996 | 0                      | 1                | 0                 | Hypothetical protein (1)                                                        |                                                                                                                                                                                                                                                                                                                                                                           | -                                                                                                                                                                                                                                                                                                                            | -                         | C_unihir_00816_mRNA_7.1  | -                    |
| GF0038995 | 0                      | 1                | 0                 | Hypothetical protein (1)                                                        | zinc ion binding [GO:0008270 molecular_function] (1); nucleic acid binding [GO:0003676 molecular_function] (1)                                                                                                                                                                                                                                                            | Zinc finger, CCHC-type [IPR001878] (1); Viral movement protein [IPR028919] (1)                                                                                                                                                                                                                                               | -                         | C_unihir_00816_mRNA_6.1  | -                    |
| GF0038994 | 0                      | 1                | 0                 | Hypothetical protein (1)                                                        |                                                                                                                                                                                                                                                                                                                                                                           | -                                                                                                                                                                                                                                                                                                                            | -                         | C_unihir_00816_mRNA_19.1 | -                    |
| GF0038993 | 0                      | 1                | 0                 | Transcription factor HEC3 (1)                                                   | protein dimerization activity [GO:0046983 molecular_function] (1)                                                                                                                                                                                                                                                                                                         | Myc-type, basic helix-loop-helix (HLH) domain [IPR011598] (1)                                                                                                                                                                                                                                                                | -                         | C_unihir_00816_mRNA_17.1 | -                    |
| GF0038992 | 0                      | 1                | 0                 | Hypothetical protein (1)                                                        |                                                                                                                                                                                                                                                                                                                                                                           | -                                                                                                                                                                                                                                                                                                                            | -                         | C_unihir_00816_mRNA_15.1 | -                    |
| GF0038991 | 0                      | 1                | 0                 | Hypothetical protein (1)                                                        |                                                                                                                                                                                                                                                                                                                                                                           | -                                                                                                                                                                                                                                                                                                                            | -                         | C_unihir_00816_mRNA_11.1 | -                    |
| GF0038990 | 0                      | 1                | 0                 | Hypothetical protein (1)                                                        |                                                                                                                                                                                                                                                                                                                                                                           | -                                                                                                                                                                                                                                                                                                                            | -                         | C_unihir_00816_mRNA_1.1  | -                    |
| GF0038989 | 0                      | 1                | 0                 | Monoaccharide transport protein (1)                                             |                                                                                                                                                                                                                                                                                                                                                                           | -                                                                                                                                                                                                                                                                                                                            | -                         | C_unihir_00815_mRNA_2.1  | -                    |
| GF0038988 | 0                      | 1                | 0                 | Hypothetical protein (1)                                                        | hydrolase activity [GO:0016787 molecular_function] (1); metabolic process [GO:0008152 biological_process] (1)                                                                                                                                                                                                                                                             | Alpha/beta hydrolase fold [IPR029058] (1); Alpha/beta hydrolase fold-3 [IPR013094] (1); Lipase, GEDAS, putative active site [IPR031340] (1); P-loop containing nucleoside triphosphate hydrolase [IPR027417] (1)                                                                                                             | -                         | C_unihir_00815_mRNA_13.1 | -                    |
| GF0038987 | 0                      | 1                | 0                 | Hypothetical protein (1)                                                        |                                                                                                                                                                                                                                                                                                                                                                           | -                                                                                                                                                                                                                                                                                                                            | -                         | C_unihir_00815_mRNA_10.1 | -                    |
| GF0038986 | 0                      | 1                | 0                 | Hypothetical protein (1)                                                        |                                                                                                                                                                                                                                                                                                                                                                           | -                                                                                                                                                                                                                                                                                                                            | -                         | C_unihir_00815_mRNA_1.1  | -                    |
| GF0038985 | 0                      | 1                | 0                 | Hypothetical protein (1)                                                        |                                                                                                                                                                                                                                                                                                                                                                           | -                                                                                                                                                                                                                                                                                                                            | -                         | C_unihir_00814_mRNA_3.1  | -                    |
| GF0038984 | 0                      | 1                | 0                 | Late embryogenesis abundant (LEA) 0 hydroxyproline-rich glycoprotein family (1) |                                                                                                                                                                                                                                                                                                                                                                           | Late embryogenesis abundant protein, LEA-14 [IPR004864] (1)                                                                                                                                                                                                                                                                  | -                         | C_unihir_00814_mRNA_23.1 | -                    |
| GF0038983 | 0                      | 1                | 0                 | Hypothetical protein (1)                                                        |                                                                                                                                                                                                                                                                                                                                                                           | -                                                                                                                                                                                                                                                                                                                            | -                         | C_unihir_00814_mRNA_19.1 | -                    |
| GF0038982 | 0                      | 1                | 0                 | Hypothetical protein (1)                                                        |                                                                                                                                                                                                                                                                                                                                                                           | -                                                                                                                                                                                                                                                                                                                            | -                         | C_unihir_00814_mRNA_18.1 | -                    |
| GF0038981 | 0                      | 1                | 0                 | Hypothetical protein (1)                                                        | nucleic acid binding [GO:0003676 molecular_function] (1)                                                                                                                                                                                                                                                                                                                  | Ribonuclease H-like domain [IPR012337] (1)                                                                                                                                                                                                                                                                                   | -                         | C_unihir_00814_mRNA_17.1 | -                    |
| GF0038980 | 0                      | 1                | 0                 | Hypothetical protein (1)                                                        | heme binding [GO:0020017 molecular_function] (1); response to oxidative stress [GO:0006979 biological_process] (1); peroxidase activity [GO:0004601 molecular_function] (1); oxidation-reduction process [GO:0055114 biological_process] (1)                                                                                                                              | Hem peroxidase [IPR010255] (1); Hem peroxidase, plant/fungal/bacterial [IPR002016] (1); Plant peroxidase [IPR000823] (1)                                                                                                                                                                                                     | -                         | C_unihir_00814_mRNA_16.1 | -                    |
| GF0038979 | 0                      | 1                | 0                 | Germ-in-like protein subfamily 2 member 4 (1)                                   | transposon insertion [GO:0001454 molecular_function] (1); uninitiated reserve activity [GO:0045735 molecular_function] (1)                                                                                                                                                                                                                                                | Germ-in [IPR011929] (1); RanK-like jelly roll fold [IPR014710] (1); Cupin 1 [IPR006045] (1); RanK-like cupin domain [IPR011051] (1)                                                                                                                                                                                          | -                         | C_unihir_00814_mRNA_12.1 | -                    |
| GF0038978 | 0                      | 1                | 0                 | Cytochrome c biogenesis C (1)                                                   | heme transporter activity [GO:0015232 molecular_function] (1); heme transport [GO:0015886 biological_process] (1); heme binding [GO:0020017 molecular_function] (1); membrane [GO:0016020 cellular_component] (1); cytochrome complex assembly [GO:0017004 biological_process] (1)                                                                                        | Cytochrome c assembly protein [IPR002341] (1); Cytochrome c-type biogenesis protein C-act. [IPR003557] (1)                                                                                                                                                                                                                   | -                         | C_unihir_00813_mRNA_9.1  | -                    |
| GF0038977 | 0                      | 1                | 0                 | Hypothetical protein (1)                                                        |                                                                                                                                                                                                                                                                                                                                                                           | -                                                                                                                                                                                                                                                                                                                            | -                         | C_unihir_00813_mRNA_8.1  | -                    |
| GF0038976 | 0                      | 1                | 0                 | Hypothetical protein (1)                                                        |                                                                                                                                                                                                                                                                                                                                                                           | -                                                                                                                                                                                                                                                                                                                            | -                         | C_unihir_00813_mRNA_7.1  | -                    |
| GF0038975 | 0                      | 1                | 0                 | Hypothetical protein (1)                                                        |                                                                                                                                                                                                                                                                                                                                                                           | -                                                                                                                                                                                                                                                                                                                            | -                         | C_unihir_00813_mRNA_25.1 | -                    |
| GF0038974 | 0                      | 1                | 0                 | Hypothetical protein (1)                                                        |                                                                                                                                                                                                                                                                                                                                                                           | -                                                                                                                                                                                                                                                                                                                            | -                         | C_unihir_00813_mRNA_23.1 | -                    |
| GF0038973 | 0                      | 1                | 0                 | Hypothetical protein (1)                                                        |                                                                                                                                                                                                                                                                                                                                                                           | -                                                                                                                                                                                                                                                                                                                            | -                         | C_unihir_00813_mRNA_22.1 | -                    |
| GF0038972 | 0                      | 1                | 0                 | Hypothetical protein (1)                                                        |                                                                                                                                                                                                                                                                                                                                                                           | -                                                                                                                                                                                                                                                                                                                            | -                         | C_unihir_00813_mRNA_17.1 | -                    |
| GF0038971 | 0                      | 1                | 0                 | Hypothetical protein (1)                                                        |                                                                                                                                                                                                                                                                                                                                                                           | -                                                                                                                                                                                                                                                                                                                            | -                         | C_unihir_00813_mRNA_16.1 | -                    |
| GF0038970 | 0                      | 1                | 0                 | Cytochrome c biogenesis ccmF protein (1)                                        |                                                                                                                                                                                                                                                                                                                                                                           | Cytochrome c-type biogenesis protein CcmF, C-terminal [IPR025221] (1)                                                                                                                                                                                                                                                        | -                         | C_unihir_00813_mRNA_14.1 | -                    |
| GF0038969 | 0                      | 1                | 0                 | Hypothetical protein (1)                                                        |                                                                                                                                                                                                                                                                                                                                                                           | -                                                                                                                                                                                                                                                                                                                            | -                         | C_unihir_00813_mRNA_13.1 | -                    |
| GF0038968 | 0                      | 1                | 0                 | Hypothetical protein (1)                                                        |                                                                                                                                                                                                                                                                                                                                                                           | -                                                                                                                                                                                                                                                                                                                            | -                         | C_unihir_00813_mRNA_1.1  | -                    |
| GF0038967 | 0                      | 1                | 0                 | Hypothetical protein (1)                                                        | aspartic-type endopeptidase activity [GO:0004190 molecular_function] (1); proteolysis [GO:0005508 biological_process] (1)                                                                                                                                                                                                                                                 | Aspartic peptidase active site [IPR001960] (1); Retropoison [IPR018061] (1)                                                                                                                                                                                                                                                  | -                         | C_unihir_00812_mRNA_9.1  | -                    |
| GF0038966 | 0                      | 1                | 0                 | Hypothetical protein (1)                                                        | binding [GO:0005488 molecular_function] (1); protein binding [GO:0005515 molecular_function] (1); carotene 7,8-desaturase activity [GO:0016179 molecular_function] (1); carotenoid biosynthetic process [GO:0016117 biological_process] (1); oxidoreductase activity [GO:0001609 molecular_function] (1); oxidation-reduction process [GO:0055114 biological_process] (1) | Leucine-rich repeat domain, I domain-like [IPR026275] (1); Zeta-carotene desaturase [IPR014101] (1); Armadillo [IPR002575] (1); Anion oxidase [IPR002937] (1); Armadillo-like helical [IPR011989] (1); FAD/NAD(P)-binding domain [IPR023753] (1); Armadillo-type fold [IPR016024] (1); NAD(P)-binding domain [IPR016040] (1) | -                         | C_unihir_00812_mRNA_7.1  | -                    |
| GF0038965 | 0                      | 1                | 0                 | Hypothetical protein (1)                                                        |                                                                                                                                                                                                                                                                                                                                                                           | -                                                                                                                                                                                                                                                                                                                            | -                         | C_unihir_00812_mRNA_6.1  | -                    |
| GF0038964 | 0                      | 1                | 0                 | Putative disease resistance gene NBS-LRR family protein (1)                     | ADP binding [GO:0043531 molecular_function] (1)                                                                                                                                                                                                                                                                                                                           | Leucine-rich repeat domain, I domain-like [IPR026275] (1); P-loop containing nucleoside triphosphate hydrolase [IPR027417] (1); NB-ARC [IPR02182] (1)                                                                                                                                                                        | -                         | C_unihir_00812_mRNA_3.1  | -                    |
| GF0038963 | 0                      | 1                | 0                 | Hypothetical protein (1)                                                        |                                                                                                                                                                                                                                                                                                                                                                           | -                                                                                                                                                                                                                                                                                                                            | -                         | C_unihir_00811_mRNA_8.1  | -                    |
| GF0038962 | 0                      | 1                | 0                 | Hypothetical protein (1)                                                        |                                                                                                                                                                                                                                                                                                                                                                           | -                                                                                                                                                                                                                                                                                                                            | -                         | C_unihir_00811_mRNA_2.1  | -                    |
| GF0038961 | 0                      | 1                | 0                 | Hypothetical protein (1)                                                        | GTP binding [GO:0005525 molecular_function] (1)                                                                                                                                                                                                                                                                                                                           | AGI-type guanine nucleotide-binding (G) domain [IPR006083] (1); P-loop containing nucleoside triphosphate hydrolase [IPR027417] (1); Isoprenoid synthase domain [IPR008049] (1)                                                                                                                                              | -                         | C_unihir_00811_mRNA_1.1  | -                    |
| GF0038960 | 0                      | 1                | 0                 | Hypothetical protein (1)                                                        |                                                                                                                                                                                                                                                                                                                                                                           | -                                                                                                                                                                                                                                                                                                                            | -                         | C_unihir_00810_mRNA_7.1  | -                    |
| GF0038959 | 0                      | 1                | 0                 | Hypothetical protein (1)                                                        |                                                                                                                                                                                                                                                                                                                                                                           | -                                                                                                                                                                                                                                                                                                                            | -                         | C_unihir_00810_mRNA_6.1  | -                    |
| GF0038958 | 0                      | 1                | 0                 | Hypothetical protein (1)                                                        |                                                                                                                                                                                                                                                                                                                                                                           | -                                                                                                                                                                                                                                                                                                                            | -                         | C_unihir_00810_mRNA_5.1  | -                    |

| ID       | Num. in <i>C. crottensteini</i> | Num. in <i>C. caudis</i> | Num. in <i>P. putida</i> | Note                                                                   | GO                                                                                                                                                                                                                                                                                                                                      | InterPro                                                                                                                                                                                                                                                                                                                                                                                                                                                                                                                             | Members in <i>C. crottensteini</i> | Members in <i>C. caudis</i> | Members in <i>P. putida</i> |
|----------|---------------------------------|--------------------------|--------------------------|------------------------------------------------------------------------|-----------------------------------------------------------------------------------------------------------------------------------------------------------------------------------------------------------------------------------------------------------------------------------------------------------------------------------------|--------------------------------------------------------------------------------------------------------------------------------------------------------------------------------------------------------------------------------------------------------------------------------------------------------------------------------------------------------------------------------------------------------------------------------------------------------------------------------------------------------------------------------------|------------------------------------|-----------------------------|-----------------------------|
| GF003897 | 0                               | 1                        | 1                        | LRR receptor-like kinase family protein (1)                            | ATP binding [GO:0005524 molecular_function] (1); protein kinase activity [GO:0004672 molecular_function] (1); protein phosphorylation [GO:0006468 biological_process] (1); protein binding [GO:0005515 molecular_function] (1)                                                                                                          | Serine/threonine dual specificity protein kinase, catalytic domain [IPRO0298] (1); Protein kinase, ATP binding site [IPRO1741] (1); Serine/threonine-protein kinase, active site [IPRO0271] (1); Leucine-rich repeat [IPRO1611] (1); Protein kinase domain [IPRO00719] (1); Concavulin A-like lectin/glycanase domain [IPRO1320] (1); Leucine rich repeat 4 [IPRO2875] (1); Leucine-rich repeat, typical subtype [IPRO0359] (1); Leucine-rich repeat domain, L domain-like [IPRO2575] (1); Protein kinase-like domain [IPRO1009] (1) | -                                  | C_unihit_00810_mRNA_3.1     | -                           |
| GF003896 | 0                               | 1                        | 0                        | Hypothetical protein (1)                                               | -                                                                                                                                                                                                                                                                                                                                       | Concavulin A-like lectin/glycanase domain [IPRO1320] (1)                                                                                                                                                                                                                                                                                                                                                                                                                                                                             | -                                  | C_unihit_00810_mRNA_2.1     | -                           |
| GF003895 | 0                               | 1                        | 0                        | Hypothetical protein (1)                                               | -                                                                                                                                                                                                                                                                                                                                       | -                                                                                                                                                                                                                                                                                                                                                                                                                                                                                                                                    | -                                  | C_unihit_00810_mRNA_1.1     | -                           |
| GF003894 | 0                               | 1                        | 0                        | Hypothetical protein (1)                                               | protein binding [GO:0005515 molecular_function] (1); polyamine transport [GO:0015846 biological_process] (1); periplasmic space [GO:0042597 cellular_component] (1); polyamine binding [GO:0019808 molecular_function] (1)                                                                                                              | Bacterial periplasmic spermidine/protein-binding protein [IPRO0188] (1); Leucine-rich repeat domain, L domain-like [IPRO32675] (1); Leucine-rich repeat, typical subtype [IPRO0359] (1); Leucine-rich repeat [IPRO0161] (1)                                                                                                                                                                                                                                                                                                          | -                                  | C_unihit_00809_mRNA_8.1     | -                           |
| GF003893 | 0                               | 1                        | 0                        | Hypothetical protein (1)                                               | -                                                                                                                                                                                                                                                                                                                                       | Aspartate-glutamate/uridylylase kinase [IPRO1048] (1)                                                                                                                                                                                                                                                                                                                                                                                                                                                                                | -                                  | C_unihit_00809_mRNA_3.1     | -                           |
| GF003892 | 0                               | 1                        | 0                        | LRR receptor-like serine/threonine-protein kinase GS01 (1)             | protein binding [GO:0005515 molecular_function] (1)                                                                                                                                                                                                                                                                                     | Leucine-rich repeat domain, L domain-like [IPRO2575] (1); Leucine-rich repeat, typical subtype [IPRO0359] (1); Leucine-rich repeat [IPRO1611] (1); Leucine-rich repeat-containing N-terminal, plant-type [IPRO1321] (1)                                                                                                                                                                                                                                                                                                              | -                                  | C_unihit_00809_mRNA_11.1    | -                           |
| GF003891 | 0                               | 1                        | 0                        | Hypothetical protein (1)                                               | -                                                                                                                                                                                                                                                                                                                                       | Myf-like domain [IPRO1787] (1)                                                                                                                                                                                                                                                                                                                                                                                                                                                                                                       | -                                  | C_unihit_00808_mRNA_6.1     | -                           |
| GF003890 | 0                               | 1                        | 0                        | Hypothetical protein (1)                                               | potassium ion transport [GO:0006113 biological_process] (1); sodium ion transport [GO:000614 biological_process] (1); integral component of membrane [GO:0016021 cellular_component] (1); monovalent cation:proton antiporter activity [GO:0005451 molecular_function] (1)                                                              | Cation H <sup>+</sup> exchanger CHX21/CHX23 [IPRO1513] (1)                                                                                                                                                                                                                                                                                                                                                                                                                                                                           | -                                  | C_unihit_00808_mRNA_3.1     | -                           |
| GF003889 | 0                               | 1                        | 0                        | Hypothetical protein (1)                                               | -                                                                                                                                                                                                                                                                                                                                       | -                                                                                                                                                                                                                                                                                                                                                                                                                                                                                                                                    | -                                  | C_unihit_00808_mRNA_2.1     | -                           |
| GF003888 | 0                               | 1                        | 0                        | Cytokinin ribazole 5'-mannophosphate phosphohydrolase (1)              | -                                                                                                                                                                                                                                                                                                                                       | LOG family [IPRO31100] (1)                                                                                                                                                                                                                                                                                                                                                                                                                                                                                                           | -                                  | C_unihit_00807_mRNA_5.1     | -                           |
| GF003887 | 0                               | 1                        | 0                        | Hypothetical protein (1)                                               | -                                                                                                                                                                                                                                                                                                                                       | -                                                                                                                                                                                                                                                                                                                                                                                                                                                                                                                                    | -                                  | C_unihit_00807_mRNA_4.1     | -                           |
| GF003886 | 0                               | 1                        | 0                        | 2,3-bisphosphoglycerate-dependent phosphoglycerate mutase (1)          | metabolic process [GO:000152 biological_process] (1); intramolecular transferase activity, phosphotransferases [GO:001668 molecular_function] (1); catalytic activity [GO:0003824 molecular_function] (1); phosphoglycerate mutase activity [GO:0004619 molecular_function] (1); glycolytic process [GO:0006096 biological_process] (1) | Hexokinase phosphatase superfamily, clade 1 [IPRO13078] (1); Phosphoglycerate-bisphosphoglycerate mutase, active site [IPRO1343] (1); Phosphoglycerate mutase 1 [IPRO0592] (1); Hexokinase phosphatase superfamily [IPRO2903] (1)                                                                                                                                                                                                                                                                                                    | -                                  | C_unihit_00807_mRNA_13.1    | -                           |
| GF003885 | 0                               | 1                        | 0                        | Hypothetical protein (1)                                               | -                                                                                                                                                                                                                                                                                                                                       | Cactin, central domain [IPRO18816] (1)                                                                                                                                                                                                                                                                                                                                                                                                                                                                                               | -                                  | C_unihit_00806_mRNA_3.1     | -                           |
| GF003884 | 0                               | 1                        | 0                        | Hypothetical protein (1)                                               | nucleic acid binding [GO:0003676 molecular_function] (1)                                                                                                                                                                                                                                                                                | Ribonuclease H-like domain [IPRO12337] (1)                                                                                                                                                                                                                                                                                                                                                                                                                                                                                           | -                                  | C_unihit_00805_mRNA_6.1     | -                           |
| GF003883 | 0                               | 1                        | 0                        | Hypothetical protein (1)                                               | -                                                                                                                                                                                                                                                                                                                                       | -                                                                                                                                                                                                                                                                                                                                                                                                                                                                                                                                    | -                                  | C_unihit_00805_mRNA_15.1    | -                           |
| GF003882 | 0                               | 1                        | 0                        | Hypothetical protein (1)                                               | -                                                                                                                                                                                                                                                                                                                                       | -                                                                                                                                                                                                                                                                                                                                                                                                                                                                                                                                    | -                                  | C_unihit_00805_mRNA_14.1    | -                           |
| GF003881 | 0                               | 1                        | 0                        | Hypothetical protein (1)                                               | core TFIIH complex [GO:000439 cellular_component] (1); nucleotide-excision repair [GO:000289 biological_process] (1); DNA-dependent DNA helicase activity [GO:0004003 molecular_function] (1); nucleus [GO:0005634 cellular_component] (1)                                                                                              | Transcription factor TFIIH subunit p52/TR2 [IPRO04988] (1)                                                                                                                                                                                                                                                                                                                                                                                                                                                                           | -                                  | C_unihit_00805_mRNA_1.1     | -                           |
| GF003880 | 0                               | 1                        | 0                        | Hypothetical protein (1)                                               | -                                                                                                                                                                                                                                                                                                                                       | -                                                                                                                                                                                                                                                                                                                                                                                                                                                                                                                                    | -                                  | C_unihit_00804_mRNA_14.1    | -                           |
| GF003879 | 0                               | 1                        | 0                        | Hypothetical protein (1)                                               | -                                                                                                                                                                                                                                                                                                                                       | -                                                                                                                                                                                                                                                                                                                                                                                                                                                                                                                                    | -                                  | C_unihit_00804_mRNA_1.1     | -                           |
| GF003878 | 0                               | 1                        | 0                        | Hypothetical protein (1)                                               | -                                                                                                                                                                                                                                                                                                                                       | -                                                                                                                                                                                                                                                                                                                                                                                                                                                                                                                                    | -                                  | C_unihit_00803_mRNA_8.1     | -                           |
| GF003877 | 0                               | 1                        | 0                        | NB-ARC domain disease resistance protein (1)                           | ADP binding [GO:0043531 molecular_function] (1)                                                                                                                                                                                                                                                                                         | NB-ARC [IPRO2182] (1); P-loop containing nucleoside triphosphate hydrolase [IPRO2747] (1); Leucine-rich repeat domain, L domain-like [IPRO2575] (1)                                                                                                                                                                                                                                                                                                                                                                                  | -                                  | C_unihit_00803_mRNA_7.1     | -                           |
| GF003876 | 0                               | 1                        | 0                        | Hypothetical protein (1)                                               | -                                                                                                                                                                                                                                                                                                                                       | -                                                                                                                                                                                                                                                                                                                                                                                                                                                                                                                                    | -                                  | C_unihit_00803_mRNA_6.1     | -                           |
| GF003875 | 0                               | 1                        | 0                        | Hypothetical protein (1)                                               | -                                                                                                                                                                                                                                                                                                                                       | -                                                                                                                                                                                                                                                                                                                                                                                                                                                                                                                                    | -                                  | C_unihit_00803_mRNA_15.1    | -                           |
| GF003874 | 0                               | 1                        | 0                        | Hypothetical protein (1)                                               | ADP binding [GO:0043531 molecular_function] (1); heme binding [GO:0020377 molecular_function] (1); response to oxidative stress [GO:000697 biological_process] (1); peroxidase activity [GO:0004601 molecular_function] (1); oxidation-reduction process [GO:005514 biological_process] (1)                                             | Hem peroxidase, plant/fungal/bacterial [IPRO2010] (1); P-loop containing nucleoside triphosphate hydrolase [IPRO2747] (1); NB-ARC [IPRO2182] (1); Plant peroxidase [IPRO0823] (1); Peroxidase heme-ligand binding site [IPRO1979] (1); Peroxidase, active site [IPRO1994] (1); Hem peroxidase [IPRO10255] (1); Leucine-rich repeat domain, L domain-like [IPRO2575] (1)                                                                                                                                                              | -                                  | C_unihit_00803_mRNA_14.1    | -                           |
| GF003873 | 0                               | 1                        | 0                        | Hypothetical protein (1)                                               | -                                                                                                                                                                                                                                                                                                                                       | -                                                                                                                                                                                                                                                                                                                                                                                                                                                                                                                                    | -                                  | C_unihit_00803_mRNA_12.1    | -                           |
| GF003872 | 0                               | 1                        | 0                        | Hypothetical protein (1)                                               | -                                                                                                                                                                                                                                                                                                                                       | -                                                                                                                                                                                                                                                                                                                                                                                                                                                                                                                                    | -                                  | C_unihit_00803_mRNA_11.1    | -                           |
| GF003871 | 0                               | 1                        | 0                        | Hypothetical protein (1)                                               | -                                                                                                                                                                                                                                                                                                                                       | -                                                                                                                                                                                                                                                                                                                                                                                                                                                                                                                                    | -                                  | C_unihit_00803_mRNA_1.1     | -                           |
| GF003870 | 0                               | 1                        | 0                        | Hypothetical protein (1)                                               | ATPase activity [GO:0016887 molecular_function] (1); ATP binding [GO:0005524 molecular_function] (1)                                                                                                                                                                                                                                    | Reverse transcriptase, RNA-dependent DNA polymerase [IPRO13103] (1); AAA+ ATPase domain [IPRO0359] (1); ABC transporter-like [IPRO03439] (1); P-loop containing nucleoside triphosphate hydrolase [IPRO2747] (1)                                                                                                                                                                                                                                                                                                                     | -                                  | C_unihit_00802_mRNA_1.1     | -                           |
| GF003869 | 0                               | 1                        | 0                        | Hypothetical protein (1)                                               | fatty-acyl-CoA binding [GO:0000062 molecular_function] (1)                                                                                                                                                                                                                                                                              | FERM acyl-CoA-binding protein, 3-helical bundle [IPRO14352] (1); Acyl-CoA-binding protein, ACBP [IPRO06582] (1)                                                                                                                                                                                                                                                                                                                                                                                                                      | -                                  | C_unihit_00801_mRNA_14.1    | -                           |
| GF003868 | 0                               | 1                        | 0                        | Hypothetical protein (1)                                               | -                                                                                                                                                                                                                                                                                                                                       | -                                                                                                                                                                                                                                                                                                                                                                                                                                                                                                                                    | -                                  | C_unihit_00800_mRNA_7.1     | -                           |
| GF003867 | 0                               | 1                        | 0                        | Hypothetical protein (1)                                               | -                                                                                                                                                                                                                                                                                                                                       | -                                                                                                                                                                                                                                                                                                                                                                                                                                                                                                                                    | -                                  | C_unihit_00799_mRNA_11.1    | -                           |
| GF003866 | 0                               | 1                        | 0                        | Hypothetical protein (1)                                               | -                                                                                                                                                                                                                                                                                                                                       | -                                                                                                                                                                                                                                                                                                                                                                                                                                                                                                                                    | -                                  | C_unihit_00798_mRNA_8.1     | -                           |
| GF003865 | 0                               | 1                        | 0                        | Hypothetical protein (1)                                               | -                                                                                                                                                                                                                                                                                                                                       | -                                                                                                                                                                                                                                                                                                                                                                                                                                                                                                                                    | -                                  | C_unihit_00798_mRNA_6.1     | -                           |
| GF003864 | 0                               | 1                        | 0                        | Hypothetical protein (1)                                               | regulation of transcription, DNA-templated [GO:0006355 biological_process] (1); DNA binding [GO:0003677 molecular_function] (1)                                                                                                                                                                                                         | NAC domain [IPRO03441] (1)                                                                                                                                                                                                                                                                                                                                                                                                                                                                                                           | -                                  | C_unihit_00798_mRNA_4.1     | -                           |
| GF003863 | 0                               | 1                        | 0                        | Hypothetical protein (1)                                               | -                                                                                                                                                                                                                                                                                                                                       | -                                                                                                                                                                                                                                                                                                                                                                                                                                                                                                                                    | -                                  | C_unihit_00798_mRNA_3.1     | -                           |
| GF003862 | 0                               | 1                        | 0                        | Hypothetical protein (1)                                               | -                                                                                                                                                                                                                                                                                                                                       | -                                                                                                                                                                                                                                                                                                                                                                                                                                                                                                                                    | -                                  | C_unihit_00797_mRNA_14.1    | -                           |
| GF003861 | 0                               | 1                        | 0                        | Hypothetical protein (1)                                               | -                                                                                                                                                                                                                                                                                                                                       | -                                                                                                                                                                                                                                                                                                                                                                                                                                                                                                                                    | -                                  | C_unihit_00797_mRNA_10.1    | -                           |
| GF003860 | 0                               | 1                        | 0                        | Hypothetical protein (1)                                               | -                                                                                                                                                                                                                                                                                                                                       | -                                                                                                                                                                                                                                                                                                                                                                                                                                                                                                                                    | -                                  | C_unihit_00796_mRNA_9.1     | -                           |
| GF003859 | 0                               | 1                        | 0                        | Hypothetical protein (1)                                               | regulation of transcription, DNA-templated [GO:0006355 biological_process] (1); protein binding [GO:0005515 molecular_function] (1); histone modification [GO:0014570 biological_process] (1); Cdk7-Pat1 complex [GO:0016593 cellular_component] (1)                                                                                    | Tetratricopeptide-like helical domain [IPRO11990] (1); RNA polymerase-associated protein Crrp [IPRO110] (1); Tetratricopeptide repeat-containing domain [IPRO13026] (1)                                                                                                                                                                                                                                                                                                                                                              | -                                  | C_unihit_00796_mRNA_7.1     | -                           |
| GF003858 | 0                               | 1                        | 0                        | Hypothetical protein (1)                                               | -                                                                                                                                                                                                                                                                                                                                       | -                                                                                                                                                                                                                                                                                                                                                                                                                                                                                                                                    | -                                  | C_unihit_00796_mRNA_2.1     | -                           |
| GF003857 | 0                               | 1                        | 0                        | Hypothetical protein (1)                                               | regulation of transcription, DNA-templated [GO:0006355 biological_process] (1)                                                                                                                                                                                                                                                          | MULE transposon domain [IPRO18289] (1); FHY3/ARI family [IPRO1052] (1)                                                                                                                                                                                                                                                                                                                                                                                                                                                               | -                                  | C_unihit_00796_mRNA_14.1    | -                           |
| GF003856 | 0                               | 1                        | 0                        | Hypothetical protein (1)                                               | -                                                                                                                                                                                                                                                                                                                                       | -                                                                                                                                                                                                                                                                                                                                                                                                                                                                                                                                    | -                                  | C_unihit_00796_mRNA_13.1    | -                           |
| GF003855 | 0                               | 1                        | 0                        | Hypothetical protein (1)                                               | -                                                                                                                                                                                                                                                                                                                                       | -                                                                                                                                                                                                                                                                                                                                                                                                                                                                                                                                    | -                                  | C_unihit_00796_mRNA_11.1    | -                           |
| GF003854 | 0                               | 1                        | 0                        | Hypothetical protein (1)                                               | -                                                                                                                                                                                                                                                                                                                                       | -                                                                                                                                                                                                                                                                                                                                                                                                                                                                                                                                    | -                                  | C_unihit_00796_mRNA_10.1    | -                           |
| GF003853 | 0                               | 1                        | 0                        | G-type lectin S-receptor-like serine/threonine-protein kinase RLK1 (1) | ATP binding [GO:0005524 molecular_function] (1); protein phosphorylation [GO:0006468 biological_process] (1); protein kinase activity [GO:0004672 molecular_function] (1)                                                                                                                                                               | Protein kinase-like domain [IPRO1009] (1); Protein kinase domain [IPRO00719] (1); Biotin-type lectin domain [IPRO1480] (1); Serine/threonine dual specificity protein kinase, catalytic domain [IPRO0290] (1)                                                                                                                                                                                                                                                                                                                        | -                                  | C_unihit_00795_mRNA_8.1     | -                           |
| GF003852 | 0                               | 1                        | 0                        | G-type lectin S-receptor-like serine/threonine-protein kinase RLK1 (1) | ATP binding [GO:0005524 molecular_function] (1); protein kinase activity [GO:0004672 molecular_function] (1); protein phosphorylation [GO:0006468 biological_process] (1)                                                                                                                                                               | Protein kinase-like domain [IPRO1009] (1); Protein kinase domain [IPRO00719] (1)                                                                                                                                                                                                                                                                                                                                                                                                                                                     | -                                  | C_unihit_00795_mRNA_7.1     | -                           |
| GF003851 | 0                               | 1                        | 0                        | Hypothetical protein (1)                                               | -                                                                                                                                                                                                                                                                                                                                       | -                                                                                                                                                                                                                                                                                                                                                                                                                                                                                                                                    | -                                  | C_unihit_00795_mRNA_15.1    | -                           |
| GF003850 | 0                               | 1                        | 0                        | Hypothetical protein (1)                                               | -                                                                                                                                                                                                                                                                                                                                       | -                                                                                                                                                                                                                                                                                                                                                                                                                                                                                                                                    | -                                  | C_unihit_00795_mRNA_13.1    | -                           |
| GF003849 | 0                               | 1                        | 0                        | Hypothetical protein (1)                                               | protein phosphorylation [GO:0006468 biological_process] (1); protein kinase activity [GO:0004672 molecular_function] (1); ATP binding [GO:0005524 molecular_function] (1)                                                                                                                                                               | Protein kinase domain [IPRO00719] (1); Protein kinase-like domain [IPRO1009] (1)                                                                                                                                                                                                                                                                                                                                                                                                                                                     | -                                  | C_unihit_00795_mRNA_10.1    | -                           |
| GF003848 | 0                               | 1                        | 0                        | Hypothetical protein (1)                                               | -                                                                                                                                                                                                                                                                                                                                       | -                                                                                                                                                                                                                                                                                                                                                                                                                                                                                                                                    | -                                  | C_unihit_00794_mRNA_9.1     | -                           |
| GF003847 | 0                               | 1                        | 0                        | Hypothetical protein (1)                                               | -                                                                                                                                                                                                                                                                                                                                       | -                                                                                                                                                                                                                                                                                                                                                                                                                                                                                                                                    | -                                  | C_unihit_00794_mRNA_1.1     | -                           |
| GF003846 | 0                               | 1                        | 0                        | Hypothetical protein (1)                                               | -                                                                                                                                                                                                                                                                                                                                       | -                                                                                                                                                                                                                                                                                                                                                                                                                                                                                                                                    | -                                  | C_unihit_00794_mRNA_15.1    | -                           |
| GF003845 | 0                               | 1                        | 0                        | Hypothetical protein (1)                                               | -                                                                                                                                                                                                                                                                                                                                       | -                                                                                                                                                                                                                                                                                                                                                                                                                                                                                                                                    | -                                  | C_unihit_00793_mRNA_11.1    | -                           |
| GF003844 | 0                               | 1                        | 0                        | Hypothetical protein (1)                                               | protein binding [GO:0005515 molecular_function] (1)                                                                                                                                                                                                                                                                                     | Askyrin repeat-containing domain [IPRO20682] (1); Askyrin repeat [IPRO2110] (1)                                                                                                                                                                                                                                                                                                                                                                                                                                                      | -                                  | C_unihit_00792_mRNA_8.1     | -                           |
| GF003843 | 0                               | 1                        | 0                        | Hypothetical protein (1)                                               | -                                                                                                                                                                                                                                                                                                                                       | -                                                                                                                                                                                                                                                                                                                                                                                                                                                                                                                                    | -                                  | C_unihit_00792_mRNA_7.1     | -                           |
| GF003842 | 0                               | 1                        | 0                        | Hypothetical protein (1)                                               | -                                                                                                                                                                                                                                                                                                                                       | -                                                                                                                                                                                                                                                                                                                                                                                                                                                                                                                                    | -                                  | C_unihit_00792_mRNA_6.1     | -                           |
| GF003841 | 0                               | 1                        | 0                        | Hypothetical protein (1)                                               | -                                                                                                                                                                                                                                                                                                                                       | -                                                                                                                                                                                                                                                                                                                                                                                                                                                                                                                                    | -                                  | C_unihit_00792_mRNA_4.1     | -                           |
| GF003840 | 0                               | 1                        | 0                        | RNA-directed DNA polymerase (Reverse transcriptase) (1)                | -                                                                                                                                                                                                                                                                                                                                       | Reverse transcriptase domain [IPRO0447] (1)                                                                                                                                                                                                                                                                                                                                                                                                                                                                                          | -                                  | C_unihit_00792_mRNA_3.1     | -                           |
| GF003839 | 0                               | 1                        | 0                        | Hypothetical protein (1)                                               | protein binding [GO:0005515 molecular_function] (1)                                                                                                                                                                                                                                                                                     | WD40 YVTN repeat-like-containing domain [IPRO1541] (1); WD40-repeat-containing domain [IPRO17986] (1); WD40 repeat [IPRO1680] (1)                                                                                                                                                                                                                                                                                                                                                                                                    | -                                  | C_unihit_00792_mRNA_13.1    | -                           |

| ID        | Num. in <i>C. crotolariae</i> | Num. in <i>C. canalis</i> | Num. in <i>P. trifidata</i> | Note                                                                     | GO                                                                                                                                                                                          | InterPro                                                                                                                                                                                                                                                                                   | Members in <i>Crotolariae</i> | Members in <i>Canalis</i> | Members in <i>Trifidata</i> |
|-----------|-------------------------------|---------------------------|-----------------------------|--------------------------------------------------------------------------|---------------------------------------------------------------------------------------------------------------------------------------------------------------------------------------------|--------------------------------------------------------------------------------------------------------------------------------------------------------------------------------------------------------------------------------------------------------------------------------------------|-------------------------------|---------------------------|-----------------------------|
| GF0038898 | 0                             | 1                         | 0                           | Hypothetical protein (1)                                                 | protein binding [GO:0005515]<br>molecular_function (1)                                                                                                                                      | WD40 repeat [IPR01680] (1); WD40-repeat-containing domain [IPR01796] (1); WD40/YVTN repeat-like-containing domain [IPR01943] (1); Leucine-rich repeat [IPR01611] (1); Leucine-rich repeat domain, I. domain-like [IPR02675] (1)                                                            | -                             | C_unihit_00792_mRNA_12.1  | -                           |
| GF0038897 | 0                             | 1                         | 0                           | Hypothetical protein (1)                                                 |                                                                                                                                                                                             | P-loop containing nucleoside triphosphate hydrolase [IPR027417] (1); AAA-type ATPase, N-terminal domain [IPR025755] (1)                                                                                                                                                                    | -                             | C_unihit_00791_mRNA_8.1   | -                           |
| GF0038896 | 0                             | 1                         | 0                           | Hypothetical protein (1)                                                 |                                                                                                                                                                                             | P-loop containing nucleoside triphosphate hydrolase [IPR027417] (1)                                                                                                                                                                                                                        | -                             | C_unihit_00791_mRNA_2.1   | -                           |
| GF0038895 | 0                             | 1                         | 0                           | Hypothetical protein (1)                                                 |                                                                                                                                                                                             |                                                                                                                                                                                                                                                                                            | -                             | C_unihit_00791_mRNA_12.1  | -                           |
| GF0038894 | 0                             | 1                         | 0                           | Hypothetical protein (1)                                                 |                                                                                                                                                                                             | Leucine-rich repeat domain, I. domain-like [IPR02675] (1)                                                                                                                                                                                                                                  | -                             | C_unihit_00790_mRNA_16.1  | -                           |
| GF0038893 | 0                             | 1                         | 0                           | Hypothetical protein (1)                                                 |                                                                                                                                                                                             |                                                                                                                                                                                                                                                                                            | -                             | C_unihit_00790_mRNA_13.1  | -                           |
| GF0038892 | 0                             | 1                         | 0                           | Hypothetical protein (1)                                                 |                                                                                                                                                                                             |                                                                                                                                                                                                                                                                                            | -                             | C_unihit_00790_mRNA_11.1  | -                           |
| GF0038891 | 0                             | 1                         | 0                           | Hypothetical protein (1)                                                 |                                                                                                                                                                                             |                                                                                                                                                                                                                                                                                            | -                             | C_unihit_00790_mRNA_10.1  | -                           |
| GF0038890 | 0                             | 1                         | 0                           | Hypothetical protein (1)                                                 |                                                                                                                                                                                             |                                                                                                                                                                                                                                                                                            | -                             | C_unihit_00790_mRNA_1.1   | -                           |
| GF0038889 | 0                             | 1                         | 0                           | Hypothetical protein (1)                                                 | metabolic process [GO:0008152]<br>biological_process (1); transferase activity, transferring hexoyl group [GO:0016758]<br>molecular_function (1)                                            | UDP-glucuronosyl/UDP-glucosyltransferase [IPR002213] (1)                                                                                                                                                                                                                                   | -                             | C_unihit_00789_mRNA_8.1   | -                           |
| GF0038888 | 0                             | 1                         | 0                           | Hypothetical protein (1)                                                 | nucleic acid binding [GO:0003676]<br>molecular_function (1)                                                                                                                                 | Ribonuclease H-like domain [IPR012337] (1)                                                                                                                                                                                                                                                 | -                             | C_unihit_00788_mRNA_8.1   | -                           |
| GF0038887 | 0                             | 1                         | 0                           | Hypothetical protein (1)                                                 | S-kinectin protein kinase family protein, putative (1)                                                                                                                                      | Bull-type lectin domain [IPR001480] (1)                                                                                                                                                                                                                                                    | -                             | C_unihit_00788_mRNA_7.1   | -                           |
| GF0038886 | 0                             | 1                         | 0                           | Hypothetical protein (1)                                                 |                                                                                                                                                                                             |                                                                                                                                                                                                                                                                                            | -                             | C_unihit_00788_mRNA_5.1   | -                           |
| GF0038885 | 0                             | 1                         | 0                           | Hypothetical protein (1)                                                 |                                                                                                                                                                                             |                                                                                                                                                                                                                                                                                            | -                             | C_unihit_00788_mRNA_3.1   | -                           |
| GF0038884 | 0                             | 1                         | 0                           | Hypothetical protein (1)                                                 |                                                                                                                                                                                             |                                                                                                                                                                                                                                                                                            | -                             | C_unihit_00788_mRNA_2.1   | -                           |
| GF0038883 | 0                             | 1                         | 0                           | Hypothetical protein (1)                                                 | dNA repair metallo-beta-lactamase family protein isoform 4 (1)                                                                                                                              | DNA repair metallo-beta-lactamase [IPR011084] (1)                                                                                                                                                                                                                                          | -                             | C_unihit_00788_mRNA_10.1  | -                           |
| GF0038882 | 0                             | 1                         | 0                           | Hypothetical protein (1)                                                 | protein phosphorylation [GO:0006468]<br>biological_process (1); protein kinase activity [GO:0004672]<br>molecular_function (1); ATP binding [GO:0005524]<br>molecular_function (1)          | Protein kinase domain [IPR000719] (1); Protein kinase-like domain [IPR011009] (1)                                                                                                                                                                                                          | -                             | C_unihit_00787_mRNA_8.1   | -                           |
| GF0038881 | 0                             | 1                         | 0                           | Hypothetical protein (1)                                                 |                                                                                                                                                                                             | Protein kinase-like domain [IPR011009] (1)                                                                                                                                                                                                                                                 | -                             | C_unihit_00787_mRNA_5.1   | -                           |
| GF0038880 | 0                             | 1                         | 0                           | Hypothetical protein (1)                                                 | protein phosphorylation [GO:0006468]<br>biological_process (1); protein kinase activity [GO:0004672]<br>molecular_function (1); ATP binding [GO:0005524]<br>molecular_function (1)          | Protein kinase domain [IPR000719] (1); Protein kinase-like domain [IPR011009] (1)                                                                                                                                                                                                          | -                             | C_unihit_00787_mRNA_4.1   | -                           |
| GF0038879 | 0                             | 1                         | 0                           | Receptor protein kinase (1)                                              | ATP binding [GO:0005524]<br>molecular_function (1); protein phosphorylation [GO:0006468]<br>biological_process (1); protein kinase activity [GO:0004672]<br>molecular_function (1)          | Serine/threonine/tyrosine protein kinase, catalytic domain [IPR002290] (1); Protein kinase-like domain [IPR011009] (1); Protein kinase domain [IPR000719] (1)                                                                                                                              | -                             | C_unihit_00787_mRNA_3.1   | -                           |
| GF0038878 | 0                             | 1                         | 0                           | Hypothetical protein (1)                                                 |                                                                                                                                                                                             |                                                                                                                                                                                                                                                                                            | -                             | C_unihit_00787_mRNA_21.1  | -                           |
| GF0038877 | 0                             | 1                         | 0                           | Hypothetical protein (1)                                                 |                                                                                                                                                                                             |                                                                                                                                                                                                                                                                                            | -                             | C_unihit_00787_mRNA_20.1  | -                           |
| GF0038876 | 0                             | 1                         | 0                           | Hypothetical protein (1)                                                 | nucleic acid binding [GO:0003676]<br>molecular_function (1)                                                                                                                                 | Ribonuclease H-like domain [IPR012337] (1)                                                                                                                                                                                                                                                 | -                             | C_unihit_00787_mRNA_14.1  | -                           |
| GF0038875 | 0                             | 1                         | 0                           | Hypothetical protein (1)                                                 | ATP binding [GO:0005524]<br>molecular_function (1); protein kinase activity [GO:0004672]<br>molecular_function (1); protein phosphorylation [GO:0006468]<br>biological_process (1)          | Protein kinase domain [IPR000719] (1); Protein kinase-like domain [IPR011009] (1)                                                                                                                                                                                                          | -                             | C_unihit_00787_mRNA_13.1  | -                           |
| GF0038874 | 0                             | 1                         | 0                           | Hypothetical protein (1)                                                 | ATP binding [GO:0005524]<br>molecular_function (1)                                                                                                                                          | Protein kinase, ATP binding site [IPR017441] (1); Protein kinase-like domain [IPR011009] (1)                                                                                                                                                                                               | -                             | C_unihit_00787_mRNA_12.1  | -                           |
| GF0038873 | 0                             | 1                         | 0                           | BRASSINOSTEROID INSENSITIVE 1 associated receptor kinase 1, putative (1) | ATP binding [GO:0005524]<br>molecular_function (1); protein phosphorylation [GO:0006468]<br>biological_process (1); protein kinase activity [GO:0004672]<br>molecular_function (1)          | Protein kinase domain [IPR000719] (1); Protein kinase-like domain [IPR011009] (1); Protein kinase, ATP binding site [IPR017441] (1); Serine/threonine/tyrosine protein kinase, catalytic domain [IPR002290] (1); Serine/threonine/tyrosine protein kinase catalytic domain [IPR001455] (1) | -                             | C_unihit_00787_mRNA_10.1  | -                           |
| GF0038872 | 0                             | 1                         | 0                           | Hypothetical protein (1)                                                 |                                                                                                                                                                                             | Protein of unknown function DUF247, plant [IPR04158] (1)                                                                                                                                                                                                                                   | -                             | C_unihit_00787_mRNA_1.1   | -                           |
| GF0038871 | 0                             | 1                         | 0                           | Putative transposable element (1)                                        |                                                                                                                                                                                             | Transposase-associated domain [IPR029480] (1); Transposon, Eu-Spm-like [IPR004242] (1)                                                                                                                                                                                                     | -                             | C_unihit_00786_mRNA_6.1   | -                           |
| GF0038870 | 0                             | 1                         | 0                           | Zinc knuckle family protein (1)                                          |                                                                                                                                                                                             |                                                                                                                                                                                                                                                                                            | -                             | C_unihit_00786_mRNA_5.1   | -                           |
| GF0038869 | 0                             | 1                         | 0                           | Hypothetical protein (1)                                                 |                                                                                                                                                                                             | Retroviral aspartyl protease [IPR013342] (1)                                                                                                                                                                                                                                               | -                             | C_unihit_00786_mRNA_4.1   | -                           |
| GF0038868 | 0                             | 1                         | 0                           | Hypothetical protein (1)                                                 |                                                                                                                                                                                             | Rainbow trout gag domain [IPR005162] (1)                                                                                                                                                                                                                                                   | -                             | C_unihit_00786_mRNA_3.1   | -                           |
| GF0038867 | 0                             | 1                         | 0                           | Hypothetical protein (1)                                                 |                                                                                                                                                                                             |                                                                                                                                                                                                                                                                                            | -                             | C_unihit_00786_mRNA_10.1  | -                           |
| GF0038866 | 0                             | 1                         | 0                           | Hypothetical protein (1)                                                 |                                                                                                                                                                                             | SGSH hydrolase-type esterase domain [IPR013800] (1)                                                                                                                                                                                                                                        | -                             | C_unihit_00785_mRNA_2.1   | -                           |
| GF0038865 | 0                             | 1                         | 0                           | Hypothetical protein (1)                                                 |                                                                                                                                                                                             |                                                                                                                                                                                                                                                                                            | -                             | C_unihit_00785_mRNA_19.1  | -                           |
| GF0038864 | 0                             | 1                         | 0                           | Hypothetical protein (1)                                                 |                                                                                                                                                                                             |                                                                                                                                                                                                                                                                                            | -                             | C_unihit_00784_mRNA_7.1   | -                           |
| GF0038863 | 0                             | 1                         | 0                           | Hypothetical protein (1)                                                 | multicellular organismal development [GO:0007275]<br>biological_process (1)                                                                                                                 | YABBY protein [IPR006780] (1)                                                                                                                                                                                                                                                              | -                             | C_unihit_00784_mRNA_5.1   | -                           |
| GF0038862 | 0                             | 1                         | 0                           | Hypothetical protein (1)                                                 |                                                                                                                                                                                             |                                                                                                                                                                                                                                                                                            | -                             | C_unihit_00784_mRNA_17.1  | -                           |
| GF0038861 | 0                             | 1                         | 0                           | Hypothetical protein (1)                                                 |                                                                                                                                                                                             |                                                                                                                                                                                                                                                                                            | -                             | C_unihit_00784_mRNA_12.1  | -                           |
| GF0038860 | 0                             | 1                         | 0                           | Hypothetical protein (1)                                                 |                                                                                                                                                                                             |                                                                                                                                                                                                                                                                                            | -                             | C_unihit_00783_mRNA_1.1   | -                           |
| GF0038859 | 0                             | 1                         | 0                           | Disease resistance protein (CC-NBS-LRR class) family protein (1)         | ADP binding [GO:0043531]<br>molecular_function (1)                                                                                                                                          | P-loop containing nucleoside triphosphate hydrolase [IPR027417] (1); NB-ARC domain, I. domain-like [IPR020571] (1)                                                                                                                                                                         | -                             | C_unihit_00782_mRNA_8.1   | -                           |
| GF0038858 | 0                             | 1                         | 0                           | Hypothetical protein (1)                                                 |                                                                                                                                                                                             | Endomannosidase/exomannosidase phosphatase [IPR005153] (1)                                                                                                                                                                                                                                 | -                             | C_unihit_00782_mRNA_7.1   | -                           |
| GF0038857 | 0                             | 1                         | 0                           | Hypothetical protein (1)                                                 | metabolic process [GO:0008152]<br>biological_process (1); catalytic activity [GO:0003824]<br>molecular_function (1)                                                                         | von Willebrand factor, type A [IPR02035] (1); P-loop containing nucleoside triphosphate hydrolase [IPR027417] (1); Aminotransferase class IV [IPR001544] (1); Copine [IPR010734] (1)                                                                                                       | -                             | C_unihit_00782_mRNA_2.1   | -                           |
| GF0038856 | 0                             | 1                         | 0                           | Hypothetical protein (1)                                                 | ADP binding [GO:0043531]<br>molecular_function (1)                                                                                                                                          | P-loop containing nucleoside triphosphate hydrolase [IPR027417] (1); NB-ARC domain, I. domain-like [IPR020571] (1)                                                                                                                                                                         | -                             | C_unihit_00782_mRNA_10.1  | -                           |
| GF0038855 | 0                             | 1                         | 0                           | Hypothetical protein (1)                                                 |                                                                                                                                                                                             |                                                                                                                                                                                                                                                                                            | -                             | C_unihit_00781_mRNA_8.1   | -                           |
| GF0038854 | 0                             | 1                         | 0                           | Hypothetical protein (1)                                                 |                                                                                                                                                                                             |                                                                                                                                                                                                                                                                                            | -                             | C_unihit_00781_mRNA_6.1   | -                           |
| GF0038853 | 0                             | 1                         | 0                           | Hypothetical protein (1)                                                 |                                                                                                                                                                                             |                                                                                                                                                                                                                                                                                            | -                             | C_unihit_00781_mRNA_5.1   | -                           |
| GF0038852 | 0                             | 1                         | 0                           | Hypothetical protein (1)                                                 |                                                                                                                                                                                             |                                                                                                                                                                                                                                                                                            | -                             | C_unihit_00781_mRNA_18.1  | -                           |
| GF0038851 | 0                             | 1                         | 0                           | Hypothetical protein (1)                                                 | zinc ion binding [GO:0008270]<br>molecular_function (1); nucleic acid binding [GO:0003676]<br>molecular_function (1)                                                                        | Zinc finger, CCHC-type [IPR001878] (1)                                                                                                                                                                                                                                                     | -                             | C_unihit_00781_mRNA_13.1  | -                           |
| GF0038850 | 0                             | 1                         | 0                           | Hypothetical protein (1)                                                 |                                                                                                                                                                                             |                                                                                                                                                                                                                                                                                            | -                             | C_unihit_00781_mRNA_1.1   | -                           |
| GF0038849 | 0                             | 1                         | 0                           | Hypothetical protein (1)                                                 | zinc ion binding [GO:0008270]<br>molecular_function (1)                                                                                                                                     | Zinc finger, SWIM-type [IPR007527] (1)                                                                                                                                                                                                                                                     | -                             | C_unihit_00780_mRNA_9.1   | -                           |
| GF0038848 | 0                             | 1                         | 0                           | Hypothetical protein (1)                                                 | ADP binding [GO:0043531]<br>molecular_function (1)                                                                                                                                          | Leucine-rich repeat domain, I. domain-like [IPR02675] (1); P-loop containing nucleoside triphosphate hydrolase [IPR027417] (1); NB-ARC [IPR002182] (1)                                                                                                                                     | -                             | C_unihit_00780_mRNA_8.1   | -                           |
| GF0038847 | 0                             | 1                         | 0                           | Hypothetical protein (1)                                                 |                                                                                                                                                                                             |                                                                                                                                                                                                                                                                                            | -                             | C_unihit_00780_mRNA_3.1   | -                           |
| GF0038846 | 0                             | 1                         | 0                           | Hypothetical protein (1)                                                 |                                                                                                                                                                                             |                                                                                                                                                                                                                                                                                            | -                             | C_unihit_00780_mRNA_2.1   | -                           |
| GF0038845 | 0                             | 1                         | 0                           | Hypothetical protein (1)                                                 |                                                                                                                                                                                             |                                                                                                                                                                                                                                                                                            | -                             | C_unihit_00780_mRNA_13.1  | -                           |
| GF0038844 | 0                             | 1                         | 0                           | Hypothetical protein (1)                                                 |                                                                                                                                                                                             |                                                                                                                                                                                                                                                                                            | -                             | C_unihit_00780_mRNA_12.1  | -                           |
| GF0038843 | 0                             | 1                         | 0                           | Hypothetical protein (1)                                                 | nucleic acid binding [GO:0003676]<br>molecular_function (1); ATP binding [GO:0005524]<br>molecular_function (1)                                                                             | Helicase superfamily 1/2, ATP-binding domain [IPR014001] (1); P-loop containing nucleoside triphosphate hydrolase [IPR027417] (1); DEAD/DEAF box helicase domain [IPR011545] (1)                                                                                                           | -                             | C_unihit_00780_mRNA_11.1  | -                           |
| GF0038842 | 0                             | 1                         | 0                           | Hypothetical protein (1)                                                 |                                                                                                                                                                                             |                                                                                                                                                                                                                                                                                            | -                             | C_unihit_00779_mRNA_7.1   | -                           |
| GF0038841 | 0                             | 1                         | 0                           | Hypothetical protein (1)                                                 |                                                                                                                                                                                             |                                                                                                                                                                                                                                                                                            | -                             | C_unihit_00779_mRNA_6.1   | -                           |
| GF0038840 | 0                             | 1                         | 0                           | Hypothetical protein (1)                                                 | DNA repair [GO:0006281]<br>biological_process (1)                                                                                                                                           | Fanconi anemia protein FANCD2 [IPR029481] (1)                                                                                                                                                                                                                                              | -                             | C_unihit_00779_mRNA_13.1  | -                           |
| GF0038839 | 0                             | 1                         | 0                           | Lactoylceramide 4-alpha-galactosyltransferase, putative (1)              |                                                                                                                                                                                             | Alpha 1,4-glycosyltransferase domain [IPR007652] (1); Glycosyltransferase, DND sugar-binding motif [IPR009571] (1); Nucleotide-diphospho-sugar transferases [IPR029044] (1)                                                                                                                | -                             | C_unihit_00779_mRNA_10.1  | -                           |
| GF0038838 | 0                             | 1                         | 0                           | Quinone oxidoreductase protein (1)                                       | zinc ion binding [GO:0008270]<br>molecular_function (1); oxidation-reduction process [GO:0005114]<br>biological_process (1); oxidoreductase activity [GO:0016901]<br>molecular_function (1) | GaGE-like [IPR011032] (1); Alcohol dehydrogenase superfamily, zinc-type [IPR02085] (1); Polyketide synthase, enoyltransferase domain [IPR00841] (1); Alcohol dehydrogenase, N-terminal [IPR013154] (1); NAD(P)-binding domain [IPR016040] (1)                                              | -                             | C_unihit_00778_mRNA_1.1   | -                           |
| GF0038837 | 0                             | 1                         | 0                           | Hypothetical protein (1)                                                 |                                                                                                                                                                                             |                                                                                                                                                                                                                                                                                            | -                             | C_unihit_00777_mRNA_1.1   | -                           |
| GF0038836 | 0                             | 1                         | 0                           | Hypothetical protein (1)                                                 |                                                                                                                                                                                             |                                                                                                                                                                                                                                                                                            | -                             | C_unihit_00776_mRNA_9.1   | -                           |
| GF0038835 | 0                             | 1                         | 0                           | Hypothetical protein (1)                                                 |                                                                                                                                                                                             |                                                                                                                                                                                                                                                                                            | -                             | C_unihit_00776_mRNA_6.1   | -                           |
| GF0038834 | 0                             | 1                         | 0                           | Hypothetical protein (1)                                                 |                                                                                                                                                                                             |                                                                                                                                                                                                                                                                                            | -                             | C_unihit_00776_mRNA_5.1   | -                           |
| GF0038833 | 0                             | 1                         | 0                           | Hypothetical protein (1)                                                 |                                                                                                                                                                                             |                                                                                                                                                                                                                                                                                            | -                             | C_unihit_00776_mRNA_3.1   | -                           |
| GF0038832 | 0                             | 1                         | 0                           | Hypothetical protein (1)                                                 |                                                                                                                                                                                             |                                                                                                                                                                                                                                                                                            | -                             | C_unihit_00776_mRNA_12.1  | -                           |
| GF0038831 | 0                             | 1                         | 0                           | Hypothetical protein (1)                                                 |                                                                                                                                                                                             |                                                                                                                                                                                                                                                                                            | -                             | C_unihit_00776_mRNA_10.1  | -                           |
| GF0038830 | 0                             | 1                         | 0                           | Hypothetical protein (1)                                                 |                                                                                                                                                                                             |                                                                                                                                                                                                                                                                                            | -                             | C_unihit_00775_mRNA_9.1   | -                           |
| GF0038829 | 0                             | 1                         | 0                           | Hypothetical protein (1)                                                 |                                                                                                                                                                                             |                                                                                                                                                                                                                                                                                            | -                             | C_unihit_00775_mRNA_8.1   | -                           |
| GF0038828 | 0                             | 1                         | 0                           | Hypothetical protein (1)                                                 |                                                                                                                                                                                             |                                                                                                                                                                                                                                                                                            | -                             | C_unihit_00775_mRNA_4.1   | -                           |
| GF0038827 | 0                             | 1                         | 0                           | Hypothetical protein (1)                                                 | protein binding [GO:0005515]<br>molecular_function (1)                                                                                                                                      | Leucine-rich repeat domain, I. domain-like [IPR02675] (1); DnaJ domain [IPR001623] (1); DnaJ domain, conserved site [IPR018253] (1); Leucine-rich repeat [IPR001611] (1)                                                                                                                   | -                             | C_unihit_00775_mRNA_3.1   | -                           |
| GF0038826 | 0                             | 1                         | 0                           | Hypothetical protein (1)                                                 |                                                                                                                                                                                             |                                                                                                                                                                                                                                                                                            | -                             | C_unihit_00775_mRNA_12.1  | -                           |



| ID       | Num. in <i>C. crottensteini</i> | Num. in <i>C. caudata</i> | Num. in <i>P. putidans</i> | Note                                                               | GO                                                                                                                                                                                                                                                                                                                | InterPro                                                                                                                                                                                                                       | Members in <i>C. crottensteini</i> | Members in <i>C. caudata</i> | Members in <i>P. putidans</i> |
|----------|---------------------------------|---------------------------|----------------------------|--------------------------------------------------------------------|-------------------------------------------------------------------------------------------------------------------------------------------------------------------------------------------------------------------------------------------------------------------------------------------------------------------|--------------------------------------------------------------------------------------------------------------------------------------------------------------------------------------------------------------------------------|------------------------------------|------------------------------|-------------------------------|
| GF003825 | 0                               | 1                         | 1                          | 0 Hypothetical protein (1)                                         |                                                                                                                                                                                                                                                                                                                   |                                                                                                                                                                                                                                |                                    | C_unihit_00775_mRNA_11.1     | -                             |
| GF003824 | 0                               | 1                         | 1                          | 0 Hypothetical protein (1)                                         |                                                                                                                                                                                                                                                                                                                   |                                                                                                                                                                                                                                |                                    | C_unihit_00775_mRNA_10.1     | -                             |
| GF003823 | 0                               | 1                         | 1                          | 0 Hypothetical protein (1)                                         | phosphoric ester hydrolase activity [GO:0042578 molecular_function] (1); protein binding [GO:0005515 molecular_function] (1)                                                                                                                                                                                      | WW domain [IPR01202] (1); SAC domain [IPR02013] (1)                                                                                                                                                                            |                                    | C_unihit_00774_mRNA_9.1      | -                             |
| GF003822 | 0                               | 1                         | 1                          | 0 Protein SUPPRESSOR OF apr1-1, CONSTITUTIVE 1 (1)                 | protein binding [GO:0005515 molecular_function] (1)                                                                                                                                                                                                                                                               | Leucine-rich repeat [IPR01611] (1); Leucine-rich repeat domain, L domain-like [IPR02675] (1)                                                                                                                                   |                                    | C_unihit_00774_mRNA_8.1      | -                             |
| GF003821 | 0                               | 1                         | 1                          | 0 Putative receptor protein kinase ZmPK1 (1)                       | protein kinase activity [GO:0004672 molecular_function] (1); protein phosphorylation [GO:0006468 biological_process] (1); ATP binding [GO:0005524 molecular_function] (1)                                                                                                                                         | Serine/threonine dual specificity protein kinase catalytic domain [IPR02290] (1); Serine/threonine-protein kinase, active site [IPR08271] (1); Protein kinase-like domain [IPR01009] (1); Protein kinase domain [IPR00719] (1) |                                    | C_unihit_00774_mRNA_4.1      | -                             |
| GF003820 | 0                               | 1                         | 1                          | 0 Hypothetical protein (1)                                         |                                                                                                                                                                                                                                                                                                                   |                                                                                                                                                                                                                                |                                    | C_unihit_00772_mRNA_9.1      | -                             |
| GF003819 | 0                               | 1                         | 1                          | 0 Hypothetical protein (1)                                         |                                                                                                                                                                                                                                                                                                                   |                                                                                                                                                                                                                                |                                    | C_unihit_00772_mRNA_8.1      | -                             |
| GF003818 | 0                               | 1                         | 1                          | 0 Hypothetical protein (1)                                         | metal ion binding [GO:0046872 molecular_function] (1)                                                                                                                                                                                                                                                             | Zinc finger, CCCC-type [IPR00571] (1)                                                                                                                                                                                          |                                    | C_unihit_00772_mRNA_2.1      | -                             |
| GF003817 | 0                               | 1                         | 1                          | 0 Hypothetical protein (1)                                         | protein dimerization activity [GO:0046983 molecular_function] (1); nucleic acid binding [GO:0003676 molecular_function] (1)                                                                                                                                                                                       | HAT, C-terminal dimerization domain [IPR00890] (1); Ribonuclease H-like domain [IPR02337] (1)                                                                                                                                  |                                    | C_unihit_00772_mRNA_10.1     | -                             |
| GF003816 | 0                               | 1                         | 1                          | 0 Hypothetical protein (1)                                         |                                                                                                                                                                                                                                                                                                                   |                                                                                                                                                                                                                                |                                    | C_unihit_00772_mRNA_1.1      | -                             |
| GF003815 | 0                               | 1                         | 1                          | 0 Hypothetical protein (1)                                         |                                                                                                                                                                                                                                                                                                                   |                                                                                                                                                                                                                                |                                    | C_unihit_00771_mRNA_9.1      | -                             |
| GF003814 | 0                               | 1                         | 1                          | 0 Hypothetical protein (1)                                         |                                                                                                                                                                                                                                                                                                                   |                                                                                                                                                                                                                                |                                    | C_unihit_00771_mRNA_7.1      | -                             |
| GF003813 | 0                               | 1                         | 1                          | 0 Hypothetical protein (1)                                         |                                                                                                                                                                                                                                                                                                                   |                                                                                                                                                                                                                                |                                    | C_unihit_00771_mRNA_3.1      | -                             |
| GF003812 | 0                               | 1                         | 1                          | 0 Cytokinin riboside 5'-monophosphate phosphorhydrolase (1)        |                                                                                                                                                                                                                                                                                                                   | LOG family [IPR01180] (1); Cytokinin riboside 5'-monophosphate phosphorhydrolase LOG [IPR005269] (1)                                                                                                                           |                                    | C_unihit_00770_mRNA_3.1      | -                             |
| GF003811 | 0                               | 1                         | 1                          | 0 Hypothetical protein (1)                                         |                                                                                                                                                                                                                                                                                                                   |                                                                                                                                                                                                                                |                                    | C_unihit_00770_mRNA_10.1     | -                             |
| GF003810 | 0                               | 1                         | 1                          | 0 Hypothetical protein (1)                                         |                                                                                                                                                                                                                                                                                                                   |                                                                                                                                                                                                                                |                                    | C_unihit_00770_mRNA_1.1      | -                             |
| GF003809 | 0                               | 1                         | 1                          | 0 Hypothetical protein (1)                                         |                                                                                                                                                                                                                                                                                                                   |                                                                                                                                                                                                                                |                                    | C_unihit_00769_mRNA_9.1      | -                             |
| GF003808 | 0                               | 1                         | 1                          | 0 Hypothetical protein (1)                                         |                                                                                                                                                                                                                                                                                                                   | Domain of unknown function DUF4283 [IPR025588] (1)                                                                                                                                                                             |                                    | C_unihit_00769_mRNA_8.1      | -                             |
| GF003807 | 0                               | 1                         | 1                          | 0 Hypothetical protein (1)                                         |                                                                                                                                                                                                                                                                                                                   |                                                                                                                                                                                                                                |                                    | C_unihit_00769_mRNA_6.1      | -                             |
| GF003806 | 0                               | 1                         | 1                          | 0 Hypothetical protein (1)                                         |                                                                                                                                                                                                                                                                                                                   | PGC domain [IPR026961] (1)                                                                                                                                                                                                     |                                    | C_unihit_00769_mRNA_5.1      | -                             |
| GF003805 | 0                               | 1                         | 1                          | 0 EEF1 protein (1)                                                 |                                                                                                                                                                                                                                                                                                                   |                                                                                                                                                                                                                                |                                    | C_unihit_00769_mRNA_2.1      | -                             |
| GF003804 | 0                               | 1                         | 1                          | 0 Hypothetical protein (1)                                         |                                                                                                                                                                                                                                                                                                                   |                                                                                                                                                                                                                                |                                    | C_unihit_00769_mRNA_18.1     | -                             |
| GF003803 | 0                               | 1                         | 1                          | 0 Hypothetical protein (1)                                         |                                                                                                                                                                                                                                                                                                                   |                                                                                                                                                                                                                                |                                    | C_unihit_00769_mRNA_13.1     | -                             |
| GF003802 | 0                               | 1                         | 1                          | 0 Expansin-like BI (1)                                             | extracellular region [GO:0005576 cellular_component] (1)                                                                                                                                                                                                                                                          | RipA-like double-pi beta-barrel domain [IPR09009] (1); Expansin pollen allergen, DFR6 domain [IPR07112] (1); Expansin Lol pI [IPR00718] (1); Expansin, cellulose-binding-like domain [IPR07117] (1)                            |                                    | C_unihit_00768_mRNA_16.1     | -                             |
| GF003801 | 0                               | 1                         | 1                          | 0 Hypothetical protein (1)                                         |                                                                                                                                                                                                                                                                                                                   |                                                                                                                                                                                                                                |                                    | C_unihit_00767_mRNA_3.1      | -                             |
| GF003800 | 0                               | 1                         | 1                          | 0 Hypothetical protein (1)                                         |                                                                                                                                                                                                                                                                                                                   | USP8 dimerization domain [IPR015063] (1)                                                                                                                                                                                       |                                    | C_unihit_00767_mRNA_20.1     | -                             |
| GF003799 | 0                               | 1                         | 1                          | 0 Hypothetical protein (1)                                         |                                                                                                                                                                                                                                                                                                                   |                                                                                                                                                                                                                                |                                    | C_unihit_00767_mRNA_19.1     | -                             |
| GF003798 | 0                               | 1                         | 1                          | 0 Cytochrome P450 71A1 (1)                                         | oxidation-reduction process [GO:005114 biological_process] (1); oxidoreductase activity, acting on paired donors, with incorporation or reduction of molecular oxygen [GO:0016785 molecular_function] (1); iron ion binding [GO:0005506 molecular_function] (1); heme binding [GO:0020037 molecular_function] (1) | Cytochrome P450 [IPR01128] (1); Cytochrome P450, E-class, group I [IPR02401] (1)                                                                                                                                               |                                    | C_unihit_00767_mRNA_18.1     | -                             |
| GF003797 | 0                               | 1                         | 1                          | 0 Hypothetical protein (1)                                         |                                                                                                                                                                                                                                                                                                                   |                                                                                                                                                                                                                                |                                    | C_unihit_00767_mRNA_17.1     | -                             |
| GF003796 | 0                               | 1                         | 1                          | 0 Hypothetical protein (1)                                         |                                                                                                                                                                                                                                                                                                                   |                                                                                                                                                                                                                                |                                    | C_unihit_00767_mRNA_16.1     | -                             |
| GF003795 | 0                               | 1                         | 1                          | 0 Hypothetical protein (1)                                         |                                                                                                                                                                                                                                                                                                                   |                                                                                                                                                                                                                                |                                    | C_unihit_00767_mRNA_11.1     | -                             |
| GF003794 | 0                               | 1                         | 1                          | 0 Hypothetical protein (1)                                         |                                                                                                                                                                                                                                                                                                                   |                                                                                                                                                                                                                                |                                    | C_unihit_00767_mRNA_1.1      | -                             |
| GF003793 | 0                               | 1                         | 1                          | 0 SLG-Si and SLA-Si genes and Melmsht retrotransposon sequence (1) |                                                                                                                                                                                                                                                                                                                   |                                                                                                                                                                                                                                |                                    | C_unihit_00766_mRNA_9.1      | -                             |
| GF003792 | 0                               | 1                         | 1                          | 0 Hypothetical protein (1)                                         |                                                                                                                                                                                                                                                                                                                   | Reverse transcriptase domain [IPR00477] (1)                                                                                                                                                                                    |                                    | C_unihit_00766_mRNA_8.1      | -                             |
| GF003791 | 0                               | 1                         | 1                          | 0 UDP-glycosyltransferase 73C5 (1)                                 | transferase activity, transferring hexosyl groups [GO:0016758 molecular_function] (1); metabolic process [GO:0008152 biological_process] (1)                                                                                                                                                                      | UDP-glucuronosyl UDP-glycosyltransferase [IPR02213] (1)                                                                                                                                                                        |                                    | C_unihit_00766_mRNA_5.1      | -                             |
| GF003790 | 0                               | 1                         | 1                          | 0 Hypothetical protein (1)                                         | zinc ion binding [GO:0008270 molecular_function] (1); nucleic acid binding [GO:0003676 molecular_function] (1)                                                                                                                                                                                                    | Domain of unknown function DUF4283 [IPR025588] (1); Zinc finger, C4HC-type [IPR01870] (1); Zinc knuckle CXC2X4HX4C [IPR025836] (1)                                                                                             |                                    | C_unihit_00766_mRNA_11.1     | -                             |
| GF003789 | 0                               | 1                         | 1                          | 0 Hypothetical protein (1)                                         | transferase activity, transferring acyl groups other than amino-acyl groups [GO:0016747 molecular_function] (1)                                                                                                                                                                                                   | Transferase [IPR003480] (1); Endonuclease-oxotransferase phosphatase [IPR05135] (1); Chloramphenicol acetyltransferase-like domain [IPR02321] (1)                                                                              |                                    | C_unihit_00766_mRNA_10.1     | -                             |
| GF003788 | 0                               | 1                         | 1                          | 0 Hypothetical protein (1)                                         |                                                                                                                                                                                                                                                                                                                   |                                                                                                                                                                                                                                |                                    | C_unihit_00766_mRNA_1.1      | -                             |
| GF003787 | 0                               | 1                         | 1                          | 0 Hypothetical protein (1)                                         |                                                                                                                                                                                                                                                                                                                   |                                                                                                                                                                                                                                |                                    | C_unihit_00765_mRNA_8.1      | -                             |
| GF003786 | 0                               | 1                         | 1                          | 0 Hypothetical protein (1)                                         | serine-type endopeptidase inhibitor activity [GO:004867 molecular_function] (1); response to wounding [GO:000961 biological_process] (1)                                                                                                                                                                          | Proteinase inhibitor 113, potato inhibitor 1 [IPR00864] (1)                                                                                                                                                                    |                                    | C_unihit_00765_mRNA_7.1      | -                             |
| GF003785 | 0                               | 1                         | 1                          | 0 Hypothetical protein (1)                                         |                                                                                                                                                                                                                                                                                                                   |                                                                                                                                                                                                                                |                                    | C_unihit_00765_mRNA_6.1      | -                             |
| GF003784 | 0                               | 1                         | 1                          | 0 Hypothetical protein (1)                                         |                                                                                                                                                                                                                                                                                                                   |                                                                                                                                                                                                                                |                                    | C_unihit_00765_mRNA_2.1      | -                             |
| GF003783 | 0                               | 1                         | 1                          | 0 Hypothetical protein (1)                                         |                                                                                                                                                                                                                                                                                                                   |                                                                                                                                                                                                                                |                                    | C_unihit_00765_mRNA_15.1     | -                             |
| GF003782 | 0                               | 1                         | 1                          | 0 Hypothetical protein (1)                                         |                                                                                                                                                                                                                                                                                                                   |                                                                                                                                                                                                                                |                                    | C_unihit_00765_mRNA_14.1     | -                             |
| GF003781 | 0                               | 1                         | 1                          | 0 Hypothetical protein (1)                                         |                                                                                                                                                                                                                                                                                                                   |                                                                                                                                                                                                                                |                                    | C_unihit_00765_mRNA_10.1     | -                             |
| GF003780 | 0                               | 1                         | 1                          | 0 Hypothetical protein (1)                                         |                                                                                                                                                                                                                                                                                                                   |                                                                                                                                                                                                                                |                                    | C_unihit_00765_mRNA_1.1      | -                             |
| GF003779 | 0                               | 1                         | 1                          | 0 Hypothetical protein (1)                                         |                                                                                                                                                                                                                                                                                                                   |                                                                                                                                                                                                                                |                                    | C_unihit_00764_mRNA_6.1      | -                             |
| GF003778 | 0                               | 1                         | 1                          | 0 Hypothetical protein (1)                                         | protein binding [GO:0005515 molecular_function] (1); zinc ion binding [GO:0008270 molecular_function] (1)                                                                                                                                                                                                         | Zinc finger, RING-type [IPR01841] (1); von Willebrand factor, type A [IPR02035] (1); Zinc finger, RING-YVY/PHD-type [IPR01308] (1)                                                                                             |                                    | C_unihit_00764_mRNA_5.1      | -                             |
| GF003777 | 0                               | 1                         | 1                          | 0 Hypothetical protein (1)                                         | transmembrane transport [GO:0050885 biological_process] (1); integral component of membrane [GO:0016021 cellular_component] (1)                                                                                                                                                                                   | Major facilitator superfamily [IPR01170] (1); Major facilitator superfamily domain [IPR02046] (1)                                                                                                                              |                                    | C_unihit_00764_mRNA_13.1     | -                             |
| GF003776 | 0                               | 1                         | 1                          | 0 Retrotransposon protein, putative, Tytopos subfamily (1)         |                                                                                                                                                                                                                                                                                                                   |                                                                                                                                                                                                                                |                                    | C_unihit_00763_mRNA_9.1      | -                             |
| GF003775 | 0                               | 1                         | 1                          | 0 Hypothetical protein (1)                                         |                                                                                                                                                                                                                                                                                                                   |                                                                                                                                                                                                                                |                                    | C_unihit_00763_mRNA_7.1      | -                             |
| GF003774 | 0                               | 1                         | 1                          | 0 Hypothetical protein (1)                                         |                                                                                                                                                                                                                                                                                                                   |                                                                                                                                                                                                                                |                                    | C_unihit_00763_mRNA_5.1      | -                             |
| GF003773 | 0                               | 1                         | 1                          | 0 Hypothetical protein (1)                                         |                                                                                                                                                                                                                                                                                                                   |                                                                                                                                                                                                                                |                                    | C_unihit_00762_mRNA_18.1     | -                             |
| GF003772 | 0                               | 1                         | 1                          | 0 Hypothetical protein (1)                                         |                                                                                                                                                                                                                                                                                                                   |                                                                                                                                                                                                                                |                                    | C_unihit_00762_mRNA_16.1     | -                             |
| GF003771 | 0                               | 1                         | 1                          | 0 Hypothetical protein (1)                                         |                                                                                                                                                                                                                                                                                                                   |                                                                                                                                                                                                                                |                                    | C_unihit_00762_mRNA_13.1     | -                             |
| GF003770 | 0                               | 1                         | 1                          | 0 Hypothetical protein (1)                                         | cysteine-type peptidase activity [GO:0008234 molecular_function] (1); proteolysis [GO:0006508 biological_process] (1)                                                                                                                                                                                             | Ulp1 protease family, C-terminal catalytic domain [IPR030453] (1)                                                                                                                                                              |                                    | C_unihit_00762_mRNA_9.1      | -                             |
| GF003769 | 0                               | 1                         | 1                          | 0 Hypothetical protein (1)                                         |                                                                                                                                                                                                                                                                                                                   |                                                                                                                                                                                                                                |                                    | C_unihit_00762_mRNA_5.1      | -                             |
| GF003768 | 0                               | 1                         | 1                          | 0 Hypothetical protein (1)                                         |                                                                                                                                                                                                                                                                                                                   |                                                                                                                                                                                                                                |                                    | C_unihit_00762_mRNA_4.1      | -                             |
| GF003767 | 0                               | 1                         | 1                          | 0 Hypothetical protein (1)                                         |                                                                                                                                                                                                                                                                                                                   |                                                                                                                                                                                                                                |                                    | C_unihit_00762_mRNA_3.1      | -                             |
| GF003766 | 0                               | 1                         | 1                          | 0 Hypothetical protein (1)                                         |                                                                                                                                                                                                                                                                                                                   |                                                                                                                                                                                                                                |                                    | C_unihit_00762_mRNA_12.1     | -                             |
| GF003765 | 0                               | 1                         | 1                          | 0 Chaperone protein DnaJ (1)                                       | protein folding [GO:0006457 biological_process] (1); unfolded protein binding [GO:001082 molecular_function] (1); response to heat [GO:0006468 biological_process] (1); heat shock protein binding [GO:0003072 molecular_function] (1); ATP binding [GO:0005524 molecular_function] (1)                           | HSP40 DnaJ peptide-binding [IPR008971] (1); DnaJ domain [IPR001623] (1); Chaperone DnaJ [IPR012742] (1); Heat shock protein DnaJ, cysteine-rich domain [IPR001305] (1); Chaperone DnaJ, C-terminal [IPR02939] (1)              |                                    | C_unihit_00761_mRNA_16.1     | -                             |
| GF003764 | 0                               | 1                         | 1                          | 0 Lanthionine synthetase C-like protein, expressed (1)             |                                                                                                                                                                                                                                                                                                                   | LanC-like protein, eukaryotic [IPR020464] (1); Lanthionine synthetase C-like [IPR007823] (1)                                                                                                                                   |                                    | C_unihit_00761_mRNA_1.1      | -                             |
| GF003763 | 0                               | 1                         | 1                          | 0 Hypothetical protein (1)                                         |                                                                                                                                                                                                                                                                                                                   | Leucine-rich repeat domain, L domain-like [IPR02675] (1)                                                                                                                                                                       |                                    | C_unihit_00760_mRNA_7.1      | -                             |
| GF003762 | 0                               | 1                         | 1                          | 0 Hypothetical protein (1)                                         |                                                                                                                                                                                                                                                                                                                   |                                                                                                                                                                                                                                |                                    | C_unihit_00760_mRNA_6.1      | -                             |
| GF003761 | 0                               | 1                         | 1                          | 0 LRR and NB-ARC domain disease resistance protein (1)             | ADP binding [GO:0043531 molecular_function] (1)                                                                                                                                                                                                                                                                   | NB-ARC [IPR02182] (1); P-loop containing nucleoside triphosphate hydrolase [IPR02747] (1); Leucine-rich repeat domain, L domain-like [IPR02675] (1)                                                                            |                                    | C_unihit_00760_mRNA_14.1     | -                             |
| GF003760 | 0                               | 1                         | 1                          | 0 Hypothetical protein (1)                                         | protein binding [GO:0005515 molecular_function] (1)                                                                                                                                                                                                                                                               | Tamariopsis-like helical domain [IPR01190] (1)                                                                                                                                                                                 |                                    | C_unihit_00760_mRNA_12.1     | -                             |
| GF003759 | 0                               | 1                         | 1                          | 0 Disease resistance protein RPS2 (1)                              |                                                                                                                                                                                                                                                                                                                   |                                                                                                                                                                                                                                |                                    | C_unihit_00760_mRNA_10.1     | -                             |
| GF003758 | 0                               | 1                         | 1                          | 0 Hypothetical protein (1)                                         |                                                                                                                                                                                                                                                                                                                   |                                                                                                                                                                                                                                |                                    | C_unihit_00760_mRNA_1.1      | -                             |
| GF003757 | 0                               | 1                         | 1                          | 0 Hypothetical protein (1)                                         |                                                                                                                                                                                                                                                                                                                   | MULE transposon domain [IPR018299] (1)                                                                                                                                                                                         |                                    | C_unihit_00759_mRNA_8.1      | -                             |
| GF003756 | 0                               | 1                         | 1                          | 0 Hypothetical protein (1)                                         |                                                                                                                                                                                                                                                                                                                   |                                                                                                                                                                                                                                |                                    | C_unihit_00759_mRNA_12.1     | -                             |
| GF003755 | 0                               | 1                         | 1                          | 0 Hypothetical protein (1)                                         |                                                                                                                                                                                                                                                                                                                   |                                                                                                                                                                                                                                |                                    | C_unihit_00759_mRNA_10.1     | -                             |
| GF003754 | 0                               | 1                         | 1                          | 0 Senescence-related gene 1 (1)                                    |                                                                                                                                                                                                                                                                                                                   | Non-haem dioxygenase N-terminal domain [IPR02992] (1); Isopeptidyl N synthase-like [IPR027445] (1)                                                                                                                             |                                    | C_unihit_00759_mRNA_1.1      | -                             |
| GF003753 | 0                               | 1                         | 1                          | 0 Hypothetical protein (1)                                         |                                                                                                                                                                                                                                                                                                                   |                                                                                                                                                                                                                                |                                    | C_unihit_00758_mRNA_5.1      | -                             |
| GF003752 | 0                               | 1                         | 1                          | 0 Amino acid permease family protein (1)                           | membrane [GO:0016020 cellular_component] (1); amino acid transmembrane transport [GO:0003333 biological_process] (1); amino acid transmembrane transporter activity [GO:0015171 molecular_function] (1)                                                                                                           | Amino acid/polyamine transporter 1 [IPR02293] (1)                                                                                                                                                                              |                                    | C_unihit_00758_mRNA_4.1      | -                             |
| GF003751 | 0                               | 1                         | 1                          | 0 Anthranilate N-benzyloxytransferase protein (1)                  | transferase activity, transferring acyl groups other than amino-acyl groups [GO:0016747 molecular_function] (1)                                                                                                                                                                                                   | Chloramphenicol acetyltransferase-like domain [IPR02321] (1); Transferase [IPR003480] (1)                                                                                                                                      |                                    | C_unihit_00758_mRNA_18.1     | -                             |
| GF003750 | 0                               | 1                         | 1                          | 0 Hypothetical protein (1)                                         |                                                                                                                                                                                                                                                                                                                   |                                                                                                                                                                                                                                |                                    | C_unihit_00758_mRNA_17.1     | -                             |
| GF003749 | 0                               | 1                         | 1                          | 0 Hypothetical protein (1)                                         |                                                                                                                                                                                                                                                                                                                   |                                                                                                                                                                                                                                |                                    | C_unihit_00758_mRNA_16.1     | -                             |
| GF003748 | 0                               | 1                         | 1                          | 0 Major facilitator protein (1)                                    |                                                                                                                                                                                                                                                                                                                   | Nodulin-like [IPR010658] (1); Major facilitator superfamily domain [IPR02046] (1)                                                                                                                                              |                                    | C_unihit_00758_mRNA_13.1     | -                             |

| ID        | Num. in C. crotteniense | Num in C. auris | Num in P. putidus | Note                                                                 | GO                                                                                                                                                                                                                                                                                                                 | InterPro                                                                                                                                                                                                                                                                                                                                                                                                                                          | Members in C. crotteniense | Members in C. auris      | Members in P. putidus |
|-----------|-------------------------|-----------------|-------------------|----------------------------------------------------------------------|--------------------------------------------------------------------------------------------------------------------------------------------------------------------------------------------------------------------------------------------------------------------------------------------------------------------|---------------------------------------------------------------------------------------------------------------------------------------------------------------------------------------------------------------------------------------------------------------------------------------------------------------------------------------------------------------------------------------------------------------------------------------------------|----------------------------|--------------------------|-----------------------|
| GF0038747 | 0                       | 1               | 0                 | Hypothetical protein (1)                                             |                                                                                                                                                                                                                                                                                                                    |                                                                                                                                                                                                                                                                                                                                                                                                                                                   |                            | C_unihii_00757_mRNA_3.1  |                       |
| GF0038746 | 0                       | 1               | 0                 | Hypothetical protein (1)                                             |                                                                                                                                                                                                                                                                                                                    |                                                                                                                                                                                                                                                                                                                                                                                                                                                   |                            | C_unihii_00757_mRNA_2.1  |                       |
| GF0038745 | 0                       | 1               | 0                 | Hypothetical protein (1)                                             | nucleic acid binding [GO:0003676 molecular_function] (1); protein dimerization activity [GO:0046983 molecular_function] (1)                                                                                                                                                                                        | Ribonuclease H-like domain [IPRO12337] (1); HAT, C-terminal dimerization domain [IPRO08906] (1)                                                                                                                                                                                                                                                                                                                                                   |                            | C_unihii_00757_mRNA_10.1 |                       |
| GF0038744 | 0                       | 1               | 0                 | Hypothetical protein (1)                                             | aspartic-type endopeptidase activity [GO:0004190 molecular_function] (1); proteolysis [GO:0006508 biological_process] (1)                                                                                                                                                                                          | Aspartic peptidase domain [IPRO21109] (1); Peptidase A2A, serine, catalytic [IPRO19951] (1); Retroviroin [IPRO18061] (1)                                                                                                                                                                                                                                                                                                                          |                            | C_unihii_00756_mRNA_5.1  |                       |
| GF0038743 | 0                       | 1               | 0                 | Hypothetical protein (1)                                             |                                                                                                                                                                                                                                                                                                                    |                                                                                                                                                                                                                                                                                                                                                                                                                                                   |                            | C_unihii_00756_mRNA_4.1  |                       |
| GF0038742 | 0                       | 1               | 0                 | Hypothetical protein (1)                                             |                                                                                                                                                                                                                                                                                                                    |                                                                                                                                                                                                                                                                                                                                                                                                                                                   |                            | C_unihii_00756_mRNA_3.1  |                       |
| GF0038741 | 0                       | 1               | 0                 | Hypothetical protein (1)                                             |                                                                                                                                                                                                                                                                                                                    |                                                                                                                                                                                                                                                                                                                                                                                                                                                   |                            | C_unihii_00756_mRNA_20.1 |                       |
| GF0038740 | 0                       | 1               | 0                 | Hypothetical protein (1)                                             |                                                                                                                                                                                                                                                                                                                    |                                                                                                                                                                                                                                                                                                                                                                                                                                                   |                            | C_unihii_00756_mRNA_16.1 |                       |
| GF0038739 | 0                       | 1               | 0                 | Hypothetical protein (1)                                             |                                                                                                                                                                                                                                                                                                                    |                                                                                                                                                                                                                                                                                                                                                                                                                                                   |                            | C_unihii_00756_mRNA_10.1 |                       |
| GF0038738 | 0                       | 1               | 0                 | Hypothetical protein (1)                                             |                                                                                                                                                                                                                                                                                                                    |                                                                                                                                                                                                                                                                                                                                                                                                                                                   |                            | C_unihii_00756_mRNA_1.1  |                       |
| GF0038737 | 0                       | 1               | 0                 | Hypothetical protein (1)                                             | ATP binding [GO:0005524 molecular_function] (1)                                                                                                                                                                                                                                                                    | GroEL-like equatorial domain [IPRO27413] (1); Chaperone Cpn60/TCP-1 family [IPRO02423] (1)                                                                                                                                                                                                                                                                                                                                                        |                            | C_unihii_00755_mRNA_8.1  |                       |
| GF0038736 | 0                       | 1               | 0                 | Hypothetical protein (1)                                             |                                                                                                                                                                                                                                                                                                                    |                                                                                                                                                                                                                                                                                                                                                                                                                                                   |                            | C_unihii_00755_mRNA_6.1  |                       |
| GF0038735 | 0                       | 1               | 0                 | Hypothetical protein (1)                                             |                                                                                                                                                                                                                                                                                                                    |                                                                                                                                                                                                                                                                                                                                                                                                                                                   |                            | C_unihii_00755_mRNA_5.1  |                       |
| GF0038734 | 0                       | 1               | 0                 | Disease resistance family protein / LRR family protein, putative (1) | protein binding [GO:0005515 molecular_function] (1)                                                                                                                                                                                                                                                                | Leucine-rich repeat, typical subtype [IPRO03911] (1); Leucine-rich repeat domain, I domain-like [IPRO32675] (1); Leucine-rich repeat [IPRO16111] (1)                                                                                                                                                                                                                                                                                              |                            | C_unihii_00755_mRNA_1.1  |                       |
| GF0038733 | 0                       | 1               | 0                 | UPF0481 protein (1)                                                  |                                                                                                                                                                                                                                                                                                                    | Protein of unknown function DUF247, plant [IPRO04158] (1)                                                                                                                                                                                                                                                                                                                                                                                         |                            | C_unihii_00754_mRNA_4.1  |                       |
| GF0038732 | 0                       | 1               | 0                 | Hypothetical protein (1)                                             |                                                                                                                                                                                                                                                                                                                    |                                                                                                                                                                                                                                                                                                                                                                                                                                                   |                            | C_unihii_00754_mRNA_2.1  |                       |
| GF0038731 | 0                       | 1               | 0                 | Leucine-rich repeat receptor-like protein kinase family (1)          | protein binding [GO:0005515 molecular_function] (1)                                                                                                                                                                                                                                                                | Leucine-rich repeat domain, I domain-like [IPRO32675] (1); Leucine-rich repeat-containing N-terminal plant-type [IPRO13210] (1); Leucine-rich repeat [IPRO16111] (1)                                                                                                                                                                                                                                                                              |                            | C_unihii_00754_mRNA_18.1 |                       |
| GF0038730 | 0                       | 1               | 0                 | Cytochrome P450 83B1 (1)                                             | heme binding [GO:0020037 molecular_function] (1); iron ion binding [GO:0005506 molecular_function] (1); oxidation-reduction process [GO:0051515 biological_process] (1); oxidoreductase activity, acting on paired donors, with incorporation or reduction of molecular oxygen [GO:0016785 molecular_function] (1) | Cytochrome P450 [IPRO1128] (1); Cytochrome P450, conserved site [IPRO17972] (1); Cytochrome P450, E-class, group I [IPRO02401] (1)                                                                                                                                                                                                                                                                                                                |                            | C_unihii_00754_mRNA_15.1 |                       |
| GF0038729 | 0                       | 1               | 0                 | Plant viral-response family protein (1)                              |                                                                                                                                                                                                                                                                                                                    | Protein of unknown function DUF176 (TMEM45) [IPRO06904] (1)                                                                                                                                                                                                                                                                                                                                                                                       |                            | C_unihii_00754_mRNA_11.1 |                       |
| GF0038728 | 0                       | 1               | 0                 | Hypothetical protein (1)                                             |                                                                                                                                                                                                                                                                                                                    |                                                                                                                                                                                                                                                                                                                                                                                                                                                   |                            | C_unihii_00753_mRNA_6.1  |                       |
| GF0038727 | 0                       | 1               | 0                 | Hypothetical protein (1)                                             |                                                                                                                                                                                                                                                                                                                    |                                                                                                                                                                                                                                                                                                                                                                                                                                                   |                            | C_unihii_00753_mRNA_5.1  |                       |
| GF0038726 | 0                       | 1               | 0                 | Hypothetical protein (1)                                             | protein binding [GO:0005515 molecular_function] (1)                                                                                                                                                                                                                                                                | Leucine-rich repeat domain, I domain-like [IPRO32675] (1); Leucine-rich repeat [IPRO16111] (1)                                                                                                                                                                                                                                                                                                                                                    |                            | C_unihii_00753_mRNA_11.1 |                       |
| GF0038725 | 0                       | 1               | 0                 | Hypothetical protein (1)                                             |                                                                                                                                                                                                                                                                                                                    | Protein kinase-like domain [IPRO11009] (1)                                                                                                                                                                                                                                                                                                                                                                                                        |                            | C_unihii_00752_mRNA_9.1  |                       |
| GF0038724 | 0                       | 1               | 0                 | Hypothetical protein (1)                                             |                                                                                                                                                                                                                                                                                                                    | Transposase, MuDR, plant [IPRO04321] (1)                                                                                                                                                                                                                                                                                                                                                                                                          |                            | C_unihii_00752_mRNA_7.1  |                       |
| GF0038723 | 0                       | 1               | 0                 | Hypothetical protein (1)                                             |                                                                                                                                                                                                                                                                                                                    |                                                                                                                                                                                                                                                                                                                                                                                                                                                   |                            | C_unihii_00752_mRNA_6.1  |                       |
| GF0038722 | 0                       | 1               | 0                 | Hypothetical protein (1)                                             |                                                                                                                                                                                                                                                                                                                    | Domain of unknown function DUF4283 [IPRO25558] (1)                                                                                                                                                                                                                                                                                                                                                                                                |                            | C_unihii_00752_mRNA_1.1  |                       |
| GF0038721 | 0                       | 1               | 0                 | Hypothetical protein (1)                                             |                                                                                                                                                                                                                                                                                                                    |                                                                                                                                                                                                                                                                                                                                                                                                                                                   |                            | C_unihii_00751_mRNA_9.1  |                       |
| GF0038720 | 0                       | 1               | 0                 | Hypothetical protein (1)                                             |                                                                                                                                                                                                                                                                                                                    |                                                                                                                                                                                                                                                                                                                                                                                                                                                   |                            | C_unihii_00751_mRNA_8.1  |                       |
| GF0038719 | 0                       | 1               | 0                 | Hypothetical protein (1)                                             |                                                                                                                                                                                                                                                                                                                    |                                                                                                                                                                                                                                                                                                                                                                                                                                                   |                            | C_unihii_00751_mRNA_7.1  |                       |
| GF0038718 | 0                       | 1               | 0                 | Hypothetical protein (1)                                             | nucleic acid binding [GO:0003676 molecular_function] (1); RNA-DNA hybrid ribonuclease activity [GO:0004523 molecular_function] (1)                                                                                                                                                                                 | Ribonuclease H-like domain [IPRO12337] (1); Ribonuclease H domain [IPRO02156] (1)                                                                                                                                                                                                                                                                                                                                                                 |                            | C_unihii_00751_mRNA_13.1 |                       |
| GF0038717 | 0                       | 1               | 0                 | ATS525460 protein (1)                                                |                                                                                                                                                                                                                                                                                                                    | Domain of unknown function DUF642 [IPRO09461] (1); Endonuclease/exonuclease/phosphatase [IPRO05135] (1)                                                                                                                                                                                                                                                                                                                                           |                            | C_unihii_00751_mRNA_10.1 |                       |
| GF0038716 | 0                       | 1               | 0                 | Metacaspase 2 (1)                                                    |                                                                                                                                                                                                                                                                                                                    | Caspase-like domain [IPRO29030] (1)                                                                                                                                                                                                                                                                                                                                                                                                               |                            | C_unihii_00750_mRNA_8.1  |                       |
| GF0038715 | 0                       | 1               | 0                 | Hypothetical protein (1)                                             |                                                                                                                                                                                                                                                                                                                    |                                                                                                                                                                                                                                                                                                                                                                                                                                                   |                            | C_unihii_00750_mRNA_7.1  |                       |
| GF0038714 | 0                       | 1               | 0                 | Hypothetical protein (1)                                             |                                                                                                                                                                                                                                                                                                                    |                                                                                                                                                                                                                                                                                                                                                                                                                                                   |                            | C_unihii_00750_mRNA_6.1  |                       |
| GF0038713 | 0                       | 1               | 0                 | Hypothetical protein (1)                                             |                                                                                                                                                                                                                                                                                                                    |                                                                                                                                                                                                                                                                                                                                                                                                                                                   |                            | C_unihii_00750_mRNA_3.1  |                       |
| GF0038712 | 0                       | 1               | 0                 | 60S ribosomal protein L14-1 (1)                                      | translocation [GO:0006412 biological_process] (1); intracellular [GO:0005222 cellular_component] (1); structural constituent of ribosome [GO:0037375 molecular_function] (1); ribosome [GO:0005840 cellular_component] (1)                                                                                         | Ribosomal protein L14 [IPRO02784] (1); Ribosomal protein L2 domain 2 [IPRO14722] (1); Translation protein SH1-like domain [IPRO08991] (1)                                                                                                                                                                                                                                                                                                         |                            | C_unihii_00750_mRNA_2.1  |                       |
| GF0038711 | 0                       | 1               | 0                 | Hypothetical protein (1)                                             |                                                                                                                                                                                                                                                                                                                    | LOG family [IPRO31100] (1)                                                                                                                                                                                                                                                                                                                                                                                                                        |                            | C_unihii_00750_mRNA_14.1 |                       |
| GF0038710 | 0                       | 1               | 0                 | Hypothetical protein (1)                                             |                                                                                                                                                                                                                                                                                                                    |                                                                                                                                                                                                                                                                                                                                                                                                                                                   |                            | C_unihii_00750_mRNA_13.1 |                       |
| GF0038709 | 0                       | 1               | 0                 | Hypothetical protein (1)                                             |                                                                                                                                                                                                                                                                                                                    |                                                                                                                                                                                                                                                                                                                                                                                                                                                   |                            | C_unihii_00750_mRNA_12.1 |                       |
| GF0038708 | 0                       | 1               | 0                 | Hypothetical protein (1)                                             |                                                                                                                                                                                                                                                                                                                    |                                                                                                                                                                                                                                                                                                                                                                                                                                                   |                            | C_unihii_00750_mRNA_10.1 |                       |
| GF0038707 | 0                       | 1               | 0                 | Hypothetical protein (1)                                             |                                                                                                                                                                                                                                                                                                                    | Endonuclease/exonuclease/phosphatase [IPRO05135] (1)                                                                                                                                                                                                                                                                                                                                                                                              |                            | C_unihii_00749_mRNA_6.1  |                       |
| GF0038706 | 0                       | 1               | 0                 | Hypothetical protein (1)                                             |                                                                                                                                                                                                                                                                                                                    |                                                                                                                                                                                                                                                                                                                                                                                                                                                   |                            | C_unihii_00749_mRNA_2.1  |                       |
| GF0038705 | 0                       | 1               | 0                 | Hypothetical protein (1)                                             |                                                                                                                                                                                                                                                                                                                    |                                                                                                                                                                                                                                                                                                                                                                                                                                                   |                            | C_unihii_00749_mRNA_18.1 |                       |
| GF0038704 | 0                       | 1               | 0                 | Hypothetical protein (1)                                             |                                                                                                                                                                                                                                                                                                                    |                                                                                                                                                                                                                                                                                                                                                                                                                                                   |                            | C_unihii_00749_mRNA_17.1 |                       |
| GF0038703 | 0                       | 1               | 0                 | Transcription factor HY5 (1)                                         | sequence-specific DNA binding [GO:0043568 molecular_function] (1); regulation of transcription, DNA-templated [GO:0006355 biological_process] (1); transcription factor activity, sequence-specific DNA binding [GO:0007030 molecular_function] (1)                                                                | Basic-leucine zipper domain [IPRO04827] (1)                                                                                                                                                                                                                                                                                                                                                                                                       |                            | C_unihii_00749_mRNA_10.1 |                       |
| GF0038702 | 0                       | 1               | 0                 | Hypothetical protein (1)                                             |                                                                                                                                                                                                                                                                                                                    |                                                                                                                                                                                                                                                                                                                                                                                                                                                   |                            | C_unihii_00748_mRNA_15.1 |                       |
| GF0038701 | 0                       | 1               | 0                 | Hypothetical protein (1)                                             |                                                                                                                                                                                                                                                                                                                    |                                                                                                                                                                                                                                                                                                                                                                                                                                                   |                            | C_unihii_00748_mRNA_14.1 |                       |
| GF0038700 | 0                       | 1               | 0                 | Hypothetical protein (1)                                             |                                                                                                                                                                                                                                                                                                                    |                                                                                                                                                                                                                                                                                                                                                                                                                                                   |                            | C_unihii_00747_mRNA_5.1  |                       |
| GF0036999 | 0                       | 1               | 0                 | Hypothetical protein (1)                                             |                                                                                                                                                                                                                                                                                                                    |                                                                                                                                                                                                                                                                                                                                                                                                                                                   |                            | C_unihii_00747_mRNA_4.1  |                       |
| GF0036998 | 0                       | 1               | 0                 | Hypothetical protein (1)                                             | nucleic acid binding [GO:0003676 molecular_function] (1); zinc ion binding [GO:0005270 molecular_function] (1)                                                                                                                                                                                                     | Zinc finger, CCHC-type [IPRO01878] (1)                                                                                                                                                                                                                                                                                                                                                                                                            |                            | C_unihii_00747_mRNA_3.1  |                       |
| GF0036997 | 0                       | 1               | 0                 | Cytokinin riboside 5'-monophosphate phosphohydrolase (1)             |                                                                                                                                                                                                                                                                                                                    | LOG family [IPRO31100] (1)                                                                                                                                                                                                                                                                                                                                                                                                                        |                            | C_unihii_00747_mRNA_2.1  |                       |
| GF0036996 | 0                       | 1               | 0                 | Hypothetical protein (1)                                             | nucleic acid binding [GO:0003676 molecular_function] (1)                                                                                                                                                                                                                                                           | Ribonuclease H-like domain [IPRO12337] (1)                                                                                                                                                                                                                                                                                                                                                                                                        |                            | C_unihii_00747_mRNA_11.1 |                       |
| GF0036995 | 0                       | 1               | 0                 | Hypothetical protein (1)                                             |                                                                                                                                                                                                                                                                                                                    |                                                                                                                                                                                                                                                                                                                                                                                                                                                   |                            | C_unihii_00747_mRNA_1.1  |                       |
| GF0036994 | 0                       | 1               | 0                 | Hypothetical protein (1)                                             |                                                                                                                                                                                                                                                                                                                    |                                                                                                                                                                                                                                                                                                                                                                                                                                                   |                            | C_unihii_00746_mRNA_8.1  |                       |
| GF0036993 | 0                       | 1               | 0                 | Hypothetical protein (1)                                             |                                                                                                                                                                                                                                                                                                                    | Domain of unknown function DUF1985 [IPRO15410] (1)                                                                                                                                                                                                                                                                                                                                                                                                |                            | C_unihii_00746_mRNA_5.1  |                       |
| GF0036992 | 0                       | 1               | 0                 | Hypothetical protein (1)                                             |                                                                                                                                                                                                                                                                                                                    |                                                                                                                                                                                                                                                                                                                                                                                                                                                   |                            | C_unihii_00746_mRNA_1.1  |                       |
| GF0036991 | 0                       | 1               | 0                 | Hypothetical protein (1)                                             | protein phosphorylation [GO:0006468 biological_process] (1); protein kinase activity [GO:0004672 molecular_function] (1); ATP binding [GO:0005524 molecular_function] (1); hydrolase activity [GO:0016787 molecular_function] (1)                                                                                  | RNA pyrophosphatase RppH [IPRO2927] (1); Protein kinase domain [IPRO00719] (1); Protein kinase-like domain [IPRO1009] (1); Winged helix-turn-helix DNA-binding domain [IPRO11911] (1); Serine/threonine/tyrosine-specific protein kinase, catalytic domain [IPRO02290] (1); NUDIX hydrolase [IPRO26476] (1); NUDIX hydrolase domain [IPRO00086] (1); NUDIX hydrolase, conserved site [IPRO20041] (1); NUDIX hydrolase domain-like [IPRO15797] (1) |                            | C_unihii_00745_mRNA_6.1  |                       |
| GF0036990 | 0                       | 1               | 0                 | Hypothetical protein (1)                                             |                                                                                                                                                                                                                                                                                                                    |                                                                                                                                                                                                                                                                                                                                                                                                                                                   |                            | C_unihii_00744_mRNA_9.1  |                       |
| GF0036889 | 0                       | 1               | 0                 | Hypothetical protein (1)                                             |                                                                                                                                                                                                                                                                                                                    |                                                                                                                                                                                                                                                                                                                                                                                                                                                   |                            | C_unihii_00744_mRNA_7.1  |                       |
| GF0036888 | 0                       | 1               | 0                 | Hypothetical protein (1)                                             |                                                                                                                                                                                                                                                                                                                    |                                                                                                                                                                                                                                                                                                                                                                                                                                                   |                            | C_unihii_00744_mRNA_6.1  |                       |
| GF0036887 | 0                       | 1               | 0                 | Hypothetical protein (1)                                             |                                                                                                                                                                                                                                                                                                                    |                                                                                                                                                                                                                                                                                                                                                                                                                                                   |                            | C_unihii_00744_mRNA_15.1 |                       |
| GF0036886 | 0                       | 1               | 0                 | Hypothetical protein (1)                                             |                                                                                                                                                                                                                                                                                                                    |                                                                                                                                                                                                                                                                                                                                                                                                                                                   |                            | C_unihii_00744_mRNA_10.1 |                       |
| GF0036885 | 0                       | 1               | 0                 | Hypothetical protein (1)                                             |                                                                                                                                                                                                                                                                                                                    |                                                                                                                                                                                                                                                                                                                                                                                                                                                   |                            | C_unihii_00744_mRNA_8.1  |                       |
| GF0036884 | 0                       | 1               | 0                 | Hypothetical protein (1)                                             |                                                                                                                                                                                                                                                                                                                    | Retrosposon gag domain [IPRO05162] (1)                                                                                                                                                                                                                                                                                                                                                                                                            |                            | C_unihii_00743_mRNA_3.1  |                       |
| GF0036883 | 0                       | 1               | 0                 | Hypothetical protein (1)                                             |                                                                                                                                                                                                                                                                                                                    |                                                                                                                                                                                                                                                                                                                                                                                                                                                   |                            | C_unihii_00742_mRNA_9.1  |                       |
| GF0036882 | 0                       | 1               | 0                 | Hypothetical protein (1)                                             |                                                                                                                                                                                                                                                                                                                    |                                                                                                                                                                                                                                                                                                                                                                                                                                                   |                            | C_unihii_00742_mRNA_17.1 |                       |
| GF0036881 | 0                       | 1               | 0                 | Hypothetical protein (1)                                             |                                                                                                                                                                                                                                                                                                                    |                                                                                                                                                                                                                                                                                                                                                                                                                                                   |                            | C_unihii_00741_mRNA_7.1  |                       |
| GF0036880 | 0                       | 1               | 0                 | Hypothetical protein (1)                                             |                                                                                                                                                                                                                                                                                                                    |                                                                                                                                                                                                                                                                                                                                                                                                                                                   |                            | C_unihii_00741_mRNA_3.1  |                       |
| GF0036879 | 0                       | 1               | 0                 | Receptor like protein 25 (1)                                         | protein binding [GO:0005515 molecular_function] (1)                                                                                                                                                                                                                                                                | Leucine-rich repeat domain, I domain-like [IPRO32675] (1); Leucine-rich repeat [IPRO16111] (1)                                                                                                                                                                                                                                                                                                                                                    |                            | C_unihii_00741_mRNA_14.1 |                       |
| GF0036878 | 0                       | 1               | 0                 | Hypothetical protein (1)                                             | nucleic acid binding [GO:0003676 molecular_function] (1)                                                                                                                                                                                                                                                           | Ribonuclease H-like domain [IPRO12337] (1)                                                                                                                                                                                                                                                                                                                                                                                                        |                            | C_unihii_00741_mRNA_13.1 |                       |
| GF0036877 | 0                       | 1               | 0                 | Hypothetical protein (1)                                             | protein binding [GO:0005515 molecular_function] (1)                                                                                                                                                                                                                                                                | Leucine-rich repeat, typical subtype [IPRO03911] (1); Leucine-rich repeat domain, I domain-like [IPRO32675] (1); Leucine-rich repeat [IPRO16111] (1)                                                                                                                                                                                                                                                                                              |                            | C_unihii_00741_mRNA_12.1 |                       |
| GF0036876 | 0                       | 1               | 0                 | Hypothetical protein (1)                                             |                                                                                                                                                                                                                                                                                                                    |                                                                                                                                                                                                                                                                                                                                                                                                                                                   |                            | C_unihii_00741_mRNA_11.1 |                       |
| GF0036875 | 0                       | 1               | 0                 | Hypothetical protein (1)                                             |                                                                                                                                                                                                                                                                                                                    |                                                                                                                                                                                                                                                                                                                                                                                                                                                   |                            | C_unihii_00741_mRNA_10.1 |                       |
| GF0036874 | 0                       | 1               | 0                 | Hypothetical protein (1)                                             |                                                                                                                                                                                                                                                                                                                    |                                                                                                                                                                                                                                                                                                                                                                                                                                                   |                            | C_unihii_00740_mRNA_7.1  |                       |
| GF0036873 | 0                       | 1               | 0                 | Hypothetical protein (1)                                             |                                                                                                                                                                                                                                                                                                                    |                                                                                                                                                                                                                                                                                                                                                                                                                                                   |                            | C_unihii_00740_mRNA_4.1  |                       |
| GF0036872 | 0                       | 1               | 0                 | Hypothetical protein (1)                                             |                                                                                                                                                                                                                                                                                                                    | Cyclic nucleotide-binding domain [IPRO06951] (1); Cyclic nucleotide-binding-like [IPRO18490] (1); RimC-like jelly roll fold [IPRO14710] (1)                                                                                                                                                                                                                                                                                                       |                            | C_unihii_00740_mRNA_2.1  |                       |
| GF0036871 | 0                       | 1               | 0                 | Hypothetical protein (1)                                             |                                                                                                                                                                                                                                                                                                                    |                                                                                                                                                                                                                                                                                                                                                                                                                                                   |                            | C_unihii_00740_mRNA_12.1 |                       |
| GF0036870 | 0                       | 1               | 0                 | Hypothetical protein (1)                                             | hydrolase activity [GO:0016787 molecular_function] (1); metabolic process [GO:0008152 biological_process] (1)                                                                                                                                                                                                      | Alpha/Beta hydrolase fold [IPRO29058] (1); Alpha/beta hydrolase fold-3 [IPRO13094] (1)                                                                                                                                                                                                                                                                                                                                                            |                            | C_unihii_00739_mRNA_9.1  |                       |
| GF0036869 | 0                       | 1               | 0                 | Hypothetical protein (1)                                             |                                                                                                                                                                                                                                                                                                                    | Domain of unknown function DUF4283 [IPRO25558] (1); Reverse transcriptase domain [IPRO00477] (1)                                                                                                                                                                                                                                                                                                                                                  |                            | C_unihii_00739_mRNA_8.1  |                       |
| GF0036868 | 0                       | 1               | 0                 | Putative non-LTR retrotransposon reverse transcriptase (1)           |                                                                                                                                                                                                                                                                                                                    |                                                                                                                                                                                                                                                                                                                                                                                                                                                   |                            | C_unihii_00739_mRNA_16.1 |                       |

| ID        | Num. in C. crotteniense | Num. in C. auris | Num. in P. putida | Name                                                          | GO                                                                                                                                                                                                                                                                                                                                                                                         | InterPro                                                                                                                                                                                                                                                                     | Members in C. crotteniense | Members in C. auris     | Members in P. putida |
|-----------|-------------------------|------------------|-------------------|---------------------------------------------------------------|--------------------------------------------------------------------------------------------------------------------------------------------------------------------------------------------------------------------------------------------------------------------------------------------------------------------------------------------------------------------------------------------|------------------------------------------------------------------------------------------------------------------------------------------------------------------------------------------------------------------------------------------------------------------------------|----------------------------|-------------------------|----------------------|
| GF0038667 | 0                       | 1                | 0                 | Hypothetical protein (1)                                      |                                                                                                                                                                                                                                                                                                                                                                                            |                                                                                                                                                                                                                                                                              |                            | C_unihh_00739_mRNA_14.1 |                      |
| GF0038666 | 0                       | 1                | 0                 | Dynamin-related protein 1E (1)                                | GTP binding [GO:0005525]<br>molecular_function (1); GTPase activity [GO:0005524 molecular_function] (1)                                                                                                                                                                                                                                                                                    | P-loop containing nucleoside triphosphate hydrolase [IPR027417] (1); Dynamin, GTPase domain [IPR014011] (1); Dynamin, GTPase region, conserved site [IPR019762] (1); Dynamin-type guanine nucleotide-binding (G) domain [IPR018311] (1); Dynamin superfamily [IPR022812] (1) |                            | C_unihh_00739_mRNA_1.1  |                      |
| GF0038665 | 0                       | 1                | 0                 | Hypothetical protein (1)                                      |                                                                                                                                                                                                                                                                                                                                                                                            |                                                                                                                                                                                                                                                                              |                            | C_unihh_00738_mRNA_18.1 |                      |
| GF0038664 | 0                       | 1                | 0                 | Hypothetical protein (1)                                      |                                                                                                                                                                                                                                                                                                                                                                                            |                                                                                                                                                                                                                                                                              |                            | C_unihh_00738_mRNA_15.1 |                      |
| GF0038663 | 0                       | 1                | 0                 | Hypothetical protein (1)                                      |                                                                                                                                                                                                                                                                                                                                                                                            |                                                                                                                                                                                                                                                                              |                            | C_unihh_00737_mRNA_4.1  |                      |
| GF0038662 | 0                       | 1                | 0                 | Hypothetical protein (1)                                      |                                                                                                                                                                                                                                                                                                                                                                                            |                                                                                                                                                                                                                                                                              |                            | C_unihh_00737_mRNA_3.1  |                      |
| GF0038661 | 0                       | 1                | 0                 | Hypothetical protein (1)                                      |                                                                                                                                                                                                                                                                                                                                                                                            |                                                                                                                                                                                                                                                                              |                            | C_unihh_00737_mRNA_2.1  |                      |
| GF0038660 | 0                       | 1                | 0                 | Hypothetical protein (1)                                      |                                                                                                                                                                                                                                                                                                                                                                                            |                                                                                                                                                                                                                                                                              |                            | C_unihh_00737_mRNA_11.1 |                      |
| GF0038659 | 0                       | 1                | 0                 | Hypothetical protein (1)                                      | nucleic acid binding [GO:0003676 molecular_function] (1); zinc ion binding [GO:0008270 molecular_function] (1)                                                                                                                                                                                                                                                                             | Zinc finger, CCHC-type [IPR001878] (1); SONH1 hydrolase-type-ctdase domain [IPR013830] (1)                                                                                                                                                                                   |                            | C_unihh_00737_mRNA_10.1 |                      |
| GF0038658 | 0                       | 1                | 0                 | Hypothetical protein (1)                                      |                                                                                                                                                                                                                                                                                                                                                                                            |                                                                                                                                                                                                                                                                              |                            | C_unihh_00737_mRNA_1.1  |                      |
| GF0038657 | 0                       | 1                | 0                 | Hypothetical protein (1)                                      | nucleic acid binding [GO:0003676 molecular_function] (1)                                                                                                                                                                                                                                                                                                                                   | Ribonuclease H-like domain [IPR012337] (1)                                                                                                                                                                                                                                   |                            | C_unihh_00736_mRNA_9.1  |                      |
| GF0038656 | 0                       | 1                | 0                 | Carboxylesterase 1 (1)                                        | hydrolase activity [GO:0016787 molecular_function] (1); metabolic process [GO:0008152 biological_process] (1)                                                                                                                                                                                                                                                                              | Alpha/beta hydrolase fold [IPR029058] (1); Alpha/beta hydrolase fold-3 [IPR013043] (1)                                                                                                                                                                                       |                            | C_unihh_00736_mRNA_7.1  |                      |
| GF0038655 | 0                       | 1                | 0                 | Putative carboxylesterase 2 (1)                               | hydrolase activity [GO:0016787 molecular_function] (1); metabolic process [GO:0008152 biological_process] (1)                                                                                                                                                                                                                                                                              | Alpha/beta hydrolase fold [IPR029058] (1); Alpha/beta hydrolase fold-3 [IPR013043] (1)                                                                                                                                                                                       |                            | C_unihh_00736_mRNA_5.1  |                      |
| GF0038654 | 0                       | 1                | 0                 | Hypothetical protein (1)                                      |                                                                                                                                                                                                                                                                                                                                                                                            |                                                                                                                                                                                                                                                                              |                            | C_unihh_00736_mRNA_16.1 |                      |
| GF0038653 | 0                       | 1                | 0                 | CXE carboxylesterase (1)                                      | hydrolase activity [GO:0016787 molecular_function] (1); metabolic process [GO:0008152 biological_process] (1)                                                                                                                                                                                                                                                                              | Alpha/beta hydrolase fold [IPR029058] (1); Alpha/beta hydrolase fold-3 [IPR013043] (1)                                                                                                                                                                                       |                            | C_unihh_00736_mRNA_1.1  |                      |
| GF0038652 | 0                       | 1                | 0                 | NAC transcription factor 29 (1)                               | DNA binding [GO:0003477 molecular_function] (1); regulation of transcription, DNA-templated [GO:0006355 biological_process] (1)                                                                                                                                                                                                                                                            | NAC domain [IPR003441] (1)                                                                                                                                                                                                                                                   |                            | C_unihh_00735_mRNA_9.1  |                      |
| GF0038651 | 0                       | 1                | 0                 | Hypothetical protein (1)                                      |                                                                                                                                                                                                                                                                                                                                                                                            |                                                                                                                                                                                                                                                                              |                            | C_unihh_00735_mRNA_17.1 |                      |
| GF0038650 | 0                       | 1                | 0                 | Hypothetical protein (1)                                      |                                                                                                                                                                                                                                                                                                                                                                                            |                                                                                                                                                                                                                                                                              |                            | C_unihh_00735_mRNA_16.1 |                      |
| GF0038649 | 0                       | 1                | 0                 | Hypothetical protein (1)                                      |                                                                                                                                                                                                                                                                                                                                                                                            |                                                                                                                                                                                                                                                                              |                            | C_unihh_00734_mRNA_9.1  |                      |
| GF0038648 | 0                       | 1                | 0                 | HAT family dimerization domain containing protein (1)         | DNA binding [GO:0003477 molecular_function] (1); nucleic acid binding [GO:0003676 molecular_function] (1)                                                                                                                                                                                                                                                                                  | hAT-like transposase, RNase-H fold [IPR025253] (1); Ribonuclease H-like domain [IPR012337] (1); Aspartic peptidase domain [IPR011091] (1)                                                                                                                                    |                            | C_unihh_00733_mRNA_9.1  |                      |
| GF0038647 | 0                       | 1                | 0                 | Hypothetical protein (1)                                      | protein dimerization activity [GO:0046983 molecular_function] (1); nucleic acid binding [GO:0003676 molecular_function] (1)                                                                                                                                                                                                                                                                | HAT, C-terminal dimerization domain [IPR008906] (1); Ribonuclease H-like domain [IPR012337] (1)                                                                                                                                                                              |                            | C_unihh_00733_mRNA_8.1  |                      |
| GF0038646 | 0                       | 1                | 0                 | Hypothetical protein (1)                                      |                                                                                                                                                                                                                                                                                                                                                                                            |                                                                                                                                                                                                                                                                              |                            | C_unihh_00733_mRNA_6.1  |                      |
| GF0038645 | 0                       | 1                | 0                 | Hypothetical protein (1)                                      |                                                                                                                                                                                                                                                                                                                                                                                            |                                                                                                                                                                                                                                                                              |                            | C_unihh_00733_mRNA_5.1  |                      |
| GF0038644 | 0                       | 1                | 0                 | Hypothetical protein (1)                                      |                                                                                                                                                                                                                                                                                                                                                                                            |                                                                                                                                                                                                                                                                              |                            | C_unihh_00733_mRNA_4.1  |                      |
| GF0038643 | 0                       | 1                | 0                 | Hypothetical protein (1)                                      |                                                                                                                                                                                                                                                                                                                                                                                            |                                                                                                                                                                                                                                                                              |                            | C_unihh_00733_mRNA_3.1  |                      |
| GF0038642 | 0                       | 1                | 0                 | Hypothetical protein (1)                                      |                                                                                                                                                                                                                                                                                                                                                                                            |                                                                                                                                                                                                                                                                              |                            | C_unihh_00733_mRNA_12.1 |                      |
| GF0038641 | 0                       | 1                | 0                 | Hypothetical protein (1)                                      |                                                                                                                                                                                                                                                                                                                                                                                            |                                                                                                                                                                                                                                                                              |                            | C_unihh_00732_mRNA_9.1  |                      |
| GF0038640 | 0                       | 1                | 0                 | Hypothetical protein (1)                                      |                                                                                                                                                                                                                                                                                                                                                                                            |                                                                                                                                                                                                                                                                              |                            | C_unihh_00732_mRNA_7.1  |                      |
| GF0038639 | 0                       | 1                | 0                 | LRR receptor like kinase family protein (1)                   |                                                                                                                                                                                                                                                                                                                                                                                            |                                                                                                                                                                                                                                                                              |                            | C_unihh_00732_mRNA_3.1  |                      |
| GF0038638 | 0                       | 1                | 0                 | Hypothetical protein (1)                                      |                                                                                                                                                                                                                                                                                                                                                                                            |                                                                                                                                                                                                                                                                              |                            | C_unihh_00732_mRNA_2.1  |                      |
| GF0038637 | 0                       | 1                | 0                 | Hypothetical protein (1)                                      |                                                                                                                                                                                                                                                                                                                                                                                            |                                                                                                                                                                                                                                                                              |                            | C_unihh_00731_mRNA_2.1  |                      |
| GF0038636 | 0                       | 1                | 0                 | Hypothetical protein (1)                                      |                                                                                                                                                                                                                                                                                                                                                                                            | NADP-dependent oxidoreductase domain [IPR023210] (1); Alko/oxo reductase/potassium channel subunit beta [IPR001395] (1)                                                                                                                                                      |                            | C_unihh_00731_mRNA_15.1 |                      |
| GF0038635 | 0                       | 1                | 0                 | Hypothetical protein (1)                                      |                                                                                                                                                                                                                                                                                                                                                                                            |                                                                                                                                                                                                                                                                              |                            | C_unihh_00731_mRNA_1.1  |                      |
| GF0038634 | 0                       | 1                | 0                 | Probable F-box protein At1g60180 (1)                          | protein binding [GO:0005515 molecular_function] (1)                                                                                                                                                                                                                                                                                                                                        | F-box domain [IPR001810] (1)                                                                                                                                                                                                                                                 |                            | C_unihh_00730_mRNA_13.1 |                      |
| GF0038633 | 0                       | 1                | 0                 | Polygalacturonase (1)                                         | polygalacturonase activity [GO:0004650 molecular_function] (1); carbohydrate metabolic process [GO:0005975 biological_process] (1)                                                                                                                                                                                                                                                         | Parallel beta-helix repeat [IPR006626] (1); Glycoside hydrolase, family 28 [IPR003103] (1); Pectin lyase fold [IPR012334] (1); Pectin lyase fold/viscous factor [IPR011050] (1)                                                                                              |                            | C_unihh_00730_mRNA_11.1 |                      |
| GF0038632 | 0                       | 1                | 0                 | Hypothetical protein (1)                                      |                                                                                                                                                                                                                                                                                                                                                                                            |                                                                                                                                                                                                                                                                              |                            | C_unihh_00729_mRNA_6.1  |                      |
| GF0038631 | 0                       | 1                | 0                 | Transferase family (1)                                        | transferase activity, transferring acyl groups other than amino-acyl groups [GO:0016747 molecular_function] (1)                                                                                                                                                                                                                                                                            | Transferase [IPR003480] (1); Chloramphenicol acetyltransferase-like domain [IPR023213] (1)                                                                                                                                                                                   |                            | C_unihh_00729_mRNA_1.1  |                      |
| GF0038630 | 0                       | 1                | 0                 | Hypothetical protein (1)                                      |                                                                                                                                                                                                                                                                                                                                                                                            |                                                                                                                                                                                                                                                                              |                            | C_unihh_00728_mRNA_21.1 |                      |
| GF0038629 | 0                       | 1                | 0                 | Hypothetical protein (1)                                      |                                                                                                                                                                                                                                                                                                                                                                                            |                                                                                                                                                                                                                                                                              |                            | C_unihh_00728_mRNA_15.1 |                      |
| GF0038628 | 0                       | 1                | 0                 | Hypothetical protein (1)                                      |                                                                                                                                                                                                                                                                                                                                                                                            |                                                                                                                                                                                                                                                                              |                            | C_unihh_00728_mRNA_14.1 |                      |
| GF0038627 | 0                       | 1                | 0                 | Putative amidase (1)                                          | carbon-nitrogen ligase activity, with glutamine as amino-N-donor [GO:0016884 molecular_function] (1)                                                                                                                                                                                                                                                                                       | Amidase signature domain [IPR023631] (1); Amidase [IPR000120] (1)                                                                                                                                                                                                            |                            | C_unihh_00728_mRNA_12.1 |                      |
| GF0038626 | 0                       | 1                | 0                 | Hypothetical protein (1)                                      |                                                                                                                                                                                                                                                                                                                                                                                            |                                                                                                                                                                                                                                                                              |                            | C_unihh_00727_mRNA_17.1 |                      |
| GF0038625 | 0                       | 1                | 0                 | Hypothetical protein (1)                                      | nucleotide binding [GO:0001666 molecular_function] (1); nucleic acid binding [GO:0003676 molecular_function] (1)                                                                                                                                                                                                                                                                           | Nucleotide-binding alpha-beta sheet domain [IPR012677] (1); RNA recognition motif domain [IPR000504] (1)                                                                                                                                                                     |                            | C_unihh_00727_mRNA_16.1 |                      |
| GF0038624 | 0                       | 1                | 0                 | Putative mdR family transposase-like (1)                      | nucleic acid binding [GO:0003676 molecular_function] (1); zinc ion binding [GO:0008270 molecular_function] (1)                                                                                                                                                                                                                                                                             | Zinc finger, CCHC-type [IPR001878] (1); Zinc finger, SWIM-type [IPR001527] (1); Zinc finger, PMZ-type [IPR006654] (1); MULE transposase domain [IPR018289] (1)                                                                                                               |                            | C_unihh_00727_mRNA_14.1 |                      |
| GF0038623 | 0                       | 1                | 0                 | Hypothetical protein (1)                                      |                                                                                                                                                                                                                                                                                                                                                                                            |                                                                                                                                                                                                                                                                              |                            | C_unihh_00727_mRNA_11.1 |                      |
| GF0038622 | 0                       | 1                | 0                 | Hypothetical protein (1)                                      | transport [GO:0006810 biological_process] (1); integral component of membrane [GO:0016021 cellular_component] (1)                                                                                                                                                                                                                                                                          | Solute carrier family 31 member- SLC35F1/FC2/F6 [IPR009282] (1)                                                                                                                                                                                                              |                            | C_unihh_00727_mRNA_1.1  |                      |
| GF0038621 | 0                       | 1                | 0                 | Seed dormancy control protein (1)                             | sequence-specific DNA binding [GO:0043565 molecular_function] (1); transcription, DNA-templated [GO:0006355 biological_process] (1)                                                                                                                                                                                                                                                        | Transcription factor TGA like domain [IPR025422] (1)                                                                                                                                                                                                                         |                            | C_unihh_00726_mRNA_6.1  |                      |
| GF0038620 | 0                       | 1                | 0                 | Hypothetical protein (1)                                      |                                                                                                                                                                                                                                                                                                                                                                                            |                                                                                                                                                                                                                                                                              |                            | C_unihh_00726_mRNA_5.1  |                      |
| GF0038619 | 0                       | 1                | 0                 | Putative F-box protein At1g99610 (1)                          | protein binding [GO:0005515 molecular_function] (1)                                                                                                                                                                                                                                                                                                                                        | F-box domain [IPR001810] (1); Leucine-rich repeat domain, L domain-like [IPR026751] (1)                                                                                                                                                                                      |                            | C_unihh_00726_mRNA_4.1  |                      |
| GF0038618 | 0                       | 1                | 0                 | Hypothetical protein (1)                                      | protein binding [GO:0005515 molecular_function] (1)                                                                                                                                                                                                                                                                                                                                        | Leucine-rich repeat domain, L domain-like [IPR026751] (1); F-box domain [IPR001810] (1)                                                                                                                                                                                      |                            | C_unihh_00726_mRNA_3.1  |                      |
| GF0038617 | 0                       | 1                | 0                 | ABC transporter C family protein (1)                          | transmembrane transport [GO:0055985 biological_process] (1); ATP binding [GO:0005524 molecular_function] (1); ATPase activity, coupled to transmembrane movement of substances [GO:0042626 molecular_function] (1); transport [GO:0006810 biological_process] (1); ATPase activity [GO:0016887 molecular_function] (1); integral component of membrane [GO:0016021 cellular_component] (1) | P-loop containing nucleoside triphosphate hydrolase [IPR027417] (1); AAA+ ATPase domain [IPR005531] (1); ABC transporter-like [IPR003439] (1); ABC transporter-type 1, transmembrane domain [IPR011527] (1)                                                                  |                            | C_unihh_00726_mRNA_1.1  |                      |
| GF0038616 | 0                       | 1                | 0                 | Hypothetical protein (1)                                      |                                                                                                                                                                                                                                                                                                                                                                                            |                                                                                                                                                                                                                                                                              |                            | C_unihh_00725_mRNA_12.1 |                      |
| GF0038615 | 0                       | 1                | 0                 | Hypothetical protein (1)                                      | aspartic-type endopeptidase activity [GO:0004190 molecular_function] (1); zinc ion binding [GO:0008270 molecular_function] (1); proteolysis [GO:0006958 biological_process] (1); nucleic acid binding [GO:0003676 molecular_function] (1)                                                                                                                                                  | Zinc finger, CCHC-type [IPR001878] (1); Retroposins [IPR018061] (1); Reverse transcriptase domain [IPR004771] (1); Aspartic peptidase, active site [IPR001969] (1)                                                                                                           |                            | C_unihh_00725_mRNA_11.1 |                      |
| GF0038614 | 0                       | 1                | 0                 | Hypothetical protein (1)                                      |                                                                                                                                                                                                                                                                                                                                                                                            |                                                                                                                                                                                                                                                                              |                            | C_unihh_00725_mRNA_1.1  |                      |
| GF0038613 | 0                       | 1                | 0                 | Hypothetical protein (1)                                      |                                                                                                                                                                                                                                                                                                                                                                                            |                                                                                                                                                                                                                                                                              |                            | C_unihh_00724_mRNA_7.1  |                      |
| GF0038612 | 0                       | 1                | 0                 | Hypothetical protein (1)                                      |                                                                                                                                                                                                                                                                                                                                                                                            |                                                                                                                                                                                                                                                                              |                            | C_unihh_00724_mRNA_23.1 |                      |
| GF0038611 | 0                       | 1                | 0                 | Hypothetical protein (1)                                      |                                                                                                                                                                                                                                                                                                                                                                                            |                                                                                                                                                                                                                                                                              |                            | C_unihh_00724_mRNA_22.1 |                      |
| GF0038610 | 0                       | 1                | 0                 | Hypothetical protein (1)                                      |                                                                                                                                                                                                                                                                                                                                                                                            |                                                                                                                                                                                                                                                                              |                            | C_unihh_00724_mRNA_21.1 |                      |
| GF0038609 | 0                       | 1                | 0                 | Hypothetical protein (1)                                      |                                                                                                                                                                                                                                                                                                                                                                                            |                                                                                                                                                                                                                                                                              |                            | C_unihh_00724_mRNA_20.1 |                      |
| GF0038608 | 0                       | 1                | 0                 | Hypothetical protein (1)                                      |                                                                                                                                                                                                                                                                                                                                                                                            |                                                                                                                                                                                                                                                                              |                            | C_unihh_00724_mRNA_2.1  |                      |
| GF0038607 | 0                       | 1                | 0                 | Hypothetical protein (1)                                      |                                                                                                                                                                                                                                                                                                                                                                                            |                                                                                                                                                                                                                                                                              |                            | C_unihh_00724_mRNA_18.1 |                      |
| GF0038606 | 0                       | 1                | 0                 | Hypothetical protein (1)                                      |                                                                                                                                                                                                                                                                                                                                                                                            |                                                                                                                                                                                                                                                                              |                            | C_unihh_00724_mRNA_17.1 |                      |
| GF0038605 | 0                       | 1                | 0                 | Hypothetical protein (1)                                      |                                                                                                                                                                                                                                                                                                                                                                                            |                                                                                                                                                                                                                                                                              |                            | C_unihh_00724_mRNA_13.1 |                      |
| GF0038604 | 0                       | 1                | 0                 | Hypothetical protein (1)                                      |                                                                                                                                                                                                                                                                                                                                                                                            |                                                                                                                                                                                                                                                                              |                            | C_unihh_00724_mRNA_1.1  |                      |
| GF0038603 | 0                       | 1                | 0                 | Hypothetical protein (1)                                      |                                                                                                                                                                                                                                                                                                                                                                                            |                                                                                                                                                                                                                                                                              |                            | C_unihh_00723_mRNA_7.1  |                      |
| GF0038602 | 0                       | 1                | 0                 | Hypothetical protein (1)                                      |                                                                                                                                                                                                                                                                                                                                                                                            |                                                                                                                                                                                                                                                                              |                            | C_unihh_00723_mRNA_6.1  |                      |
| GF0038601 | 0                       | 1                | 0                 | Hypothetical protein (1)                                      |                                                                                                                                                                                                                                                                                                                                                                                            |                                                                                                                                                                                                                                                                              |                            | C_unihh_00723_mRNA_5.1  |                      |
| GF0038600 | 0                       | 1                | 0                 | Hypothetical protein (1)                                      |                                                                                                                                                                                                                                                                                                                                                                                            |                                                                                                                                                                                                                                                                              |                            | C_unihh_00723_mRNA_4.1  |                      |
| GF0035999 | 0                       | 1                | 0                 | Hypothetical protein (1)                                      | protein binding [GO:0005515 molecular_function] (1)                                                                                                                                                                                                                                                                                                                                        | Leucine-rich repeat [IPR001611] (1); Leucine-rich repeat domain, L domain-like [IPR026751] (1)                                                                                                                                                                               |                            | C_unihh_00723_mRNA_14.1 |                      |
| GF0035998 | 0                       | 1                | 0                 | Hypothetical protein (1)                                      |                                                                                                                                                                                                                                                                                                                                                                                            |                                                                                                                                                                                                                                                                              |                            | C_unihh_00723_mRNA_12.1 |                      |
| GF0035997 | 0                       | 1                | 0                 | Cytoskinin riboside 5'-monophosphate phosphoribohydrolase (1) |                                                                                                                                                                                                                                                                                                                                                                                            | LOG family [IPR031100] (1)                                                                                                                                                                                                                                                   |                            | C_unihh_00722_mRNA_6.1  |                      |
| GF0035996 | 0                       | 1                | 0                 | Hypothetical protein (1)                                      |                                                                                                                                                                                                                                                                                                                                                                                            |                                                                                                                                                                                                                                                                              |                            | C_unihh_00722_mRNA_4.1  |                      |
| GF0035995 | 0                       | 1                | 0                 | Hypothetical protein (1)                                      |                                                                                                                                                                                                                                                                                                                                                                                            |                                                                                                                                                                                                                                                                              |                            | C_unihh_00721_mRNA_10.1 |                      |
| GF0035994 | 0                       | 1                | 0                 | N-carbamoylputrescine amidase (1)                             | hydrolase activity, acting on carbon-nitrogen (but not peptide) bonds [GO:0016810 molecular_function] (1); nitrogen compound metabolic process [GO:0006907 biological_process] (1); nucleic acid binding [GO:0003676 molecular_function] (1)                                                                                                                                               | Carbon-nitrogen hydrolase [IPR003010] (1)                                                                                                                                                                                                                                    |                            | C_unihh_00720_mRNA_6.1  |                      |
| GF0035993 | 0                       | 1                | 0                 | Hypothetical protein (1)                                      |                                                                                                                                                                                                                                                                                                                                                                                            |                                                                                                                                                                                                                                                                              |                            | C_unihh_00720_mRNA_5.1  |                      |
| GF0035992 | 0                       | 1                | 0                 | Hypothetical protein (1)                                      |                                                                                                                                                                                                                                                                                                                                                                                            |                                                                                                                                                                                                                                                                              |                            | C_unihh_00720_mRNA_4.1  |                      |
| GF0035991 | 0                       | 1                | 0                 | Hypothetical protein (1)                                      |                                                                                                                                                                                                                                                                                                                                                                                            |                                                                                                                                                                                                                                                                              |                            | C_unihh_00720_mRNA_3.1  |                      |

| ID       | Num. in C. crottenstei | Num. in C. auris | Num. in P. putida | Name                                                                                   | GO                                                                                                                                                                                                                                                      | InterPro                                                                                                                                                                                                                                                                       | Members in C. crottenstei | Members in C. auris     | Members in P. putida |
|----------|------------------------|------------------|-------------------|----------------------------------------------------------------------------------------|---------------------------------------------------------------------------------------------------------------------------------------------------------------------------------------------------------------------------------------------------------|--------------------------------------------------------------------------------------------------------------------------------------------------------------------------------------------------------------------------------------------------------------------------------|---------------------------|-------------------------|----------------------|
| GF003890 | 0                      | 1                | 0                 | Hypothetical protein (1)                                                               |                                                                                                                                                                                                                                                         | Retromer-spanning gag domain [IPR006121] (1)                                                                                                                                                                                                                                   | -                         | C_ushii_00720_mRNA_2.1  | -                    |
| GF003889 | 0                      | 1                | 0                 | Hypothetical protein (1)                                                               | O-methyltransferase activity [GO:0008171 molecular_function] (1); methyltransferase activity [GO:0008168 molecular_function] (1)                                                                                                                        | O-methyltransferase, family 2 [IPR01077] (1); O-methyltransferase COMT-type [IPR016461] (1); S-adenosyl-L-methionine-dependent methyltransferase [IPR029063] (1)                                                                                                               | -                         | C_ushii_00719_mRNA_9.1  | -                    |
| GF003888 | 0                      | 1                | 0                 | Caffeic acid O-methyltransferase (1)                                                   | O-methyltransferase activity [GO:0008171 molecular_function] (1); protein dimerization activity [GO:0046983 molecular_function] (1); methyltransferase activity [GO:0008168 molecular_function] (1)                                                     | O-methyltransferase COMT-type [IPR016461] (1); Plant methyltransferase dimerization [IPR012967] (1); Winged helix-helix DNA-binding domain [IPR011991] (1); O-methyltransferase, family 2 [IPR01077] (1)                                                                       | -                         | C_ushii_00719_mRNA_8.1  | -                    |
| GF003887 | 0                      | 1                | 0                 | ER lumen protein-retaining receptor (1)                                                | protein retention in ER lumen [GO:006621 biological_process] (1); integral component of membrane [GO:001602 cellular_component] (1); ER retention sequence binding [GO:0046923 molecular_function] (1)                                                  | ER lumen protein retaining receptor [IPR00133] (1)                                                                                                                                                                                                                             | -                         | C_ushii_00719_mRNA_2.1  | -                    |
| GF003886 | 0                      | 1                | 0                 | Caffeic acid O-methyltransferase (1)                                                   | methyltransferase activity [GO:0008168 molecular_function] (1); O-methyltransferase activity [GO:0008171 molecular_function] (1)                                                                                                                        | O-methyltransferase COMT-type [IPR016461] (1); O-methyltransferase, family 2 [IPR01077] (1); S-adenosyl-L-methionine-dependent methyltransferase [IPR029063] (1)                                                                                                               | -                         | C_ushii_00719_mRNA_10.1 | -                    |
| GF003885 | 0                      | 1                | 0                 | Hypothetical protein (1)                                                               |                                                                                                                                                                                                                                                         |                                                                                                                                                                                                                                                                                | -                         | C_ushii_00718_mRNA_4.1  | -                    |
| GF003884 | 0                      | 1                | 0                 | DnaG14 protein, putative (1)                                                           |                                                                                                                                                                                                                                                         |                                                                                                                                                                                                                                                                                | -                         | C_ushii_00718_mRNA_2.1  | -                    |
| GF003883 | 0                      | 1                | 0                 | HD domain class transcription factor (1)                                               | protein binding [GO:0005515 molecular_function] (1); signal transduction [GO:0007165 biological_process] (1)                                                                                                                                            | Toll-interleukin-1 receptor homology (TIR) domain [IPR00157] (1)                                                                                                                                                                                                               | -                         | C_ushii_00717_mRNA_15.1 | -                    |
| GF003882 | 0                      | 1                | 0                 | Hypothetical protein (1)                                                               |                                                                                                                                                                                                                                                         |                                                                                                                                                                                                                                                                                | -                         | C_ushii_00717_mRNA_1.1  | -                    |
| GF003881 | 0                      | 1                | 0                 | Hypothetical protein (1)                                                               |                                                                                                                                                                                                                                                         |                                                                                                                                                                                                                                                                                | -                         | C_ushii_00716_mRNA_9.1  | -                    |
| GF003880 | 0                      | 1                | 0                 | Hypothetical protein (1)                                                               |                                                                                                                                                                                                                                                         |                                                                                                                                                                                                                                                                                | -                         | C_ushii_00716_mRNA_8.1  | -                    |
| GF003879 | 0                      | 1                | 0                 | Putative disease resistance protein Aa1905 (1)                                         | ADP binding [GO:0042331 molecular_function] (1); protein binding [GO:0005515 molecular_function] (1)                                                                                                                                                    | Leucine-rich repeat, typical subtype [IPR003591] (1); Leucine-rich repeat domain, L domain-like [IPR02675] (1); P-loop containing nucleoside triphosphate hydrolyase [IPR027417] (1); Leucine-rich repeat [IPR01611] (1); NB-ARC [IPR02182] (1)                                | -                         | C_ushii_00716_mRNA_4.1  | -                    |
| GF003878 | 0                      | 1                | 0                 | Hypothetical protein (1)                                                               |                                                                                                                                                                                                                                                         |                                                                                                                                                                                                                                                                                | -                         | C_ushii_00716_mRNA_3.1  | -                    |
| GF003877 | 0                      | 1                | 0                 | Hypothetical protein (1)                                                               |                                                                                                                                                                                                                                                         | Retromer-spanning gag domain [IPR006121] (1)                                                                                                                                                                                                                                   | -                         | C_ushii_00716_mRNA_16.1 | -                    |
| GF003876 | 0                      | 1                | 0                 | Hypothetical protein (1)                                                               |                                                                                                                                                                                                                                                         |                                                                                                                                                                                                                                                                                | -                         | C_ushii_00716_mRNA_15.1 | -                    |
| GF003875 | 0                      | 1                | 0                 | Hypothetical protein (1)                                                               |                                                                                                                                                                                                                                                         |                                                                                                                                                                                                                                                                                | -                         | C_ushii_00716_mRNA_13.1 | -                    |
| GF003874 | 0                      | 1                | 0                 | Hypothetical protein (1)                                                               |                                                                                                                                                                                                                                                         |                                                                                                                                                                                                                                                                                | -                         | C_ushii_00716_mRNA_10.1 | -                    |
| GF003873 | 0                      | 1                | 0                 | Tobamovirus multiplication 1 isoform 4 (1)                                             |                                                                                                                                                                                                                                                         | Domain of unknown function DUF1084 [IPR009457] (1)                                                                                                                                                                                                                             | -                         | C_ushii_00716_mRNA_1.1  | -                    |
| GF003872 | 0                      | 1                | 0                 | P-loop containing nucleoside triphosphate hydrolyase superfamily protein isoform 9 (1) | GTP binding [GO:0005525 molecular_function] (1)                                                                                                                                                                                                         | GTP binding domain [IPR006073] (1); P-loop containing nucleoside triphosphate hydrolyase [IPR027417] (1); Eng-type guanine nucleotide-binding (G) domain [IPR00393] (1)                                                                                                        | -                         | C_ushii_00715_mRNA_19.1 | -                    |
| GF003871 | 0                      | 1                | 0                 | Hypothetical protein (1)                                                               |                                                                                                                                                                                                                                                         | Reverse transcriptase domain [IPR006477] (1)                                                                                                                                                                                                                                   | -                         | C_ushii_00715_mRNA_16.1 | -                    |
| GF003870 | 0                      | 1                | 0                 | Hypothetical protein (1)                                                               |                                                                                                                                                                                                                                                         | Leucine-rich repeat domain, L domain-like [IPR02675] (1)                                                                                                                                                                                                                       | -                         | C_ushii_00715_mRNA_1.1  | -                    |
| GF003869 | 0                      | 1                | 0                 | Hypothetical protein (1)                                                               | DNA binding [GO:0003677 molecular_function] (1)                                                                                                                                                                                                         | Zinc finger, BED-type [IPR03656] (1)                                                                                                                                                                                                                                           | -                         | C_ushii_00714_mRNA_7.1  | -                    |
| GF003868 | 0                      | 1                | 0                 | Hypothetical protein (1)                                                               |                                                                                                                                                                                                                                                         |                                                                                                                                                                                                                                                                                | -                         | C_ushii_00714_mRNA_6.1  | -                    |
| GF003867 | 0                      | 1                | 0                 | Hypothetical protein (1)                                                               |                                                                                                                                                                                                                                                         |                                                                                                                                                                                                                                                                                | -                         | C_ushii_00714_mRNA_5.1  | -                    |
| GF003866 | 0                      | 1                | 0                 | Hypothetical protein (1)                                                               | nucleic acid binding [GO:0003676 molecular_function] (1); zinc ion binding [GO:0008270 molecular_function] (1)                                                                                                                                          | Zinc finger, CCHC-type [IPR011878] (1)                                                                                                                                                                                                                                         | -                         | C_ushii_00714_mRNA_2.1  | -                    |
| GF003865 | 0                      | 1                | 0                 | Progesterone 5-beta-reductase (1)                                                      |                                                                                                                                                                                                                                                         | NAD(P)-binding domain [IPR016040] (1)                                                                                                                                                                                                                                          | -                         | C_ushii_00714_mRNA_10.1 | -                    |
| GF003864 | 0                      | 1                | 0                 | Pollex-specific protein C13 (1)                                                        |                                                                                                                                                                                                                                                         | HodDg domain [IPR029099] (1)                                                                                                                                                                                                                                                   | -                         | C_ushii_00713_mRNA_7.1  | -                    |
| GF003863 | 0                      | 1                | 0                 | Hypothetical protein (1)                                                               |                                                                                                                                                                                                                                                         | Metallo-dependent phosphatase-like [IPR029052] (1)                                                                                                                                                                                                                             | -                         | C_ushii_00713_mRNA_3.1  | -                    |
| GF003862 | 0                      | 1                | 0                 | Hypothetical protein (1)                                                               |                                                                                                                                                                                                                                                         | Toll-interleukin-1 receptor homology (TIR) domain [IPR00157] (1); Leucine-rich repeat domain, L domain-like [IPR02675] (1); Winged helix-helix DNA-binding domain [IPR011991] (1); P-loop containing nucleoside triphosphate hydrolyase [IPR027417] (1); NB-ARC [IPR02182] (1) | -                         | C_ushii_00712_mRNA_4.1  | -                    |
| GF003861 | 0                      | 1                | 0                 | Hypothetical protein (1)                                                               | protein binding [GO:0005515 molecular_function] (1); signal transduction [GO:0007165 biological_process] (1); ADP binding [GO:0042331 molecular_function] (1)                                                                                           | Toll-interleukin-1 receptor homology (TIR) domain [IPR00157] (1); Leucine-rich repeat domain, L domain-like [IPR02675] (1); Winged helix-helix DNA-binding domain [IPR011991] (1); P-loop containing nucleoside triphosphate hydrolyase [IPR027417] (1); NB-ARC [IPR02182] (1) | -                         | C_ushii_00712_mRNA_17.1 | -                    |
| GF003860 | 0                      | 1                | 0                 | Protein SUPPRESSOR OF apr1-1, CONSTITUTIVE 1 (1)                                       | protein binding [GO:0005515 molecular_function] (1); signal transduction [GO:0007165 biological_process] (1)                                                                                                                                            | Toll-interleukin-1 receptor homology (TIR) domain [IPR00157] (1); Leucine-rich repeat domain, L domain-like [IPR02675] (1); Leucine-rich repeat [IPR01611] (1)                                                                                                                 | -                         | C_ushii_00712_mRNA_15.1 | -                    |
| GF003859 | 0                      | 1                | 0                 | Hypothetical protein (1)                                                               | zinc ion binding [GO:0008270 molecular_function] (1)                                                                                                                                                                                                    | Zinc finger, SWIM-type [IPR007527] (1); Zinc finger, PMZ-type [IPR006564] (1)                                                                                                                                                                                                  | -                         | C_ushii_00712_mRNA_14.1 | -                    |
| GF003858 | 0                      | 1                | 0                 | Hypothetical protein (1)                                                               |                                                                                                                                                                                                                                                         |                                                                                                                                                                                                                                                                                | -                         | C_ushii_00712_mRNA_1.1  | -                    |
| GF003857 | 0                      | 1                | 0                 | Hypothetical protein (1)                                                               |                                                                                                                                                                                                                                                         |                                                                                                                                                                                                                                                                                | -                         | C_ushii_00711_mRNA_7.1  | -                    |
| GF003856 | 0                      | 1                | 0                 | Cytokinin riboside 5'-monophosphate phosphohydrolase (1)                               |                                                                                                                                                                                                                                                         |                                                                                                                                                                                                                                                                                | -                         | C_ushii_00711_mRNA_4.1  | -                    |
| GF003855 | 0                      | 1                | 0                 | Hypothetical protein (1)                                                               |                                                                                                                                                                                                                                                         |                                                                                                                                                                                                                                                                                | -                         | C_ushii_00711_mRNA_2.1  | -                    |
| GF003854 | 0                      | 1                | 0                 | Hypothetical protein (1)                                                               |                                                                                                                                                                                                                                                         |                                                                                                                                                                                                                                                                                | -                         | C_ushii_00710_mRNA_16.1 | -                    |
| GF003853 | 0                      | 1                | 0                 | Hypothetical protein (1)                                                               |                                                                                                                                                                                                                                                         |                                                                                                                                                                                                                                                                                | -                         | C_ushii_00710_mRNA_13.1 | -                    |
| GF003852 | 0                      | 1                | 0                 | Hypothetical protein (1)                                                               |                                                                                                                                                                                                                                                         |                                                                                                                                                                                                                                                                                | -                         | C_ushii_00710_mRNA_12.1 | -                    |
| GF003851 | 0                      | 1                | 0                 | Putative disease resistance protein (1)                                                | protein binding [GO:0005515 molecular_function] (1); ADP binding [GO:0042331 molecular_function] (1)                                                                                                                                                    | P-loop containing nucleoside triphosphate hydrolyase [IPR027417] (1); Leucine-rich repeat [IPR01611] (1); NB-ARC [IPR02182] (1); Leucine-rich repeat domain, L domain-like [IPR02675] (1)                                                                                      | -                         | C_ushii_00710_mRNA_11.1 | -                    |
| GF003850 | 0                      | 1                | 0                 | Hypothetical protein (1)                                                               |                                                                                                                                                                                                                                                         |                                                                                                                                                                                                                                                                                | -                         | C_ushii_00709_mRNA_9.1  | -                    |
| GF003849 | 0                      | 1                | 0                 | Hypothetical protein (1)                                                               |                                                                                                                                                                                                                                                         |                                                                                                                                                                                                                                                                                | -                         | C_ushii_00709_mRNA_8.1  | -                    |
| GF003848 | 0                      | 1                | 0                 | Hypothetical protein (1)                                                               |                                                                                                                                                                                                                                                         |                                                                                                                                                                                                                                                                                | -                         | C_ushii_00709_mRNA_5.1  | -                    |
| GF003847 | 0                      | 1                | 0                 | Hypothetical protein (1)                                                               |                                                                                                                                                                                                                                                         |                                                                                                                                                                                                                                                                                | -                         | C_ushii_00709_mRNA_2.1  | -                    |
| GF003846 | 0                      | 1                | 0                 | Hypothetical protein (1)                                                               | nucleic acid binding [GO:0003676 molecular_function] (1)                                                                                                                                                                                                | Ribonuclease H-like domain [IPR012337] (1)                                                                                                                                                                                                                                     | -                         | C_ushii_00709_mRNA_17.1 | -                    |
| GF003845 | 0                      | 1                | 0                 | Hypothetical protein (1)                                                               |                                                                                                                                                                                                                                                         |                                                                                                                                                                                                                                                                                | -                         | C_ushii_00709_mRNA_16.1 | -                    |
| GF003844 | 0                      | 1                | 0                 | Ribonuclease H protein (1)                                                             | RNA-DNA hybrid ribonuclease activity [GO:0004523 molecular_function] (1); nucleic acid binding [GO:0003676 molecular_function] (1)                                                                                                                      | Endonuclease/exonuclease/phosphatase [IPR005193] (1); Ribonuclease H domain [IPR005156] (1); Reverse transcriptase zinc-binding domain [IPR026960] (1); Ribonuclease H-like domain [IPR012337] (1)                                                                             | -                         | C_ushii_00709_mRNA_15.1 | -                    |
| GF003843 | 0                      | 1                | 0                 | Hypothetical protein (1)                                                               |                                                                                                                                                                                                                                                         |                                                                                                                                                                                                                                                                                | -                         | C_ushii_00709_mRNA_14.1 | -                    |
| GF003842 | 0                      | 1                | 0                 | Hypothetical protein (1)                                                               |                                                                                                                                                                                                                                                         |                                                                                                                                                                                                                                                                                | -                         | C_ushii_00709_mRNA_13.1 | -                    |
| GF003841 | 0                      | 1                | 0                 | Hypothetical protein (1)                                                               |                                                                                                                                                                                                                                                         |                                                                                                                                                                                                                                                                                | -                         | C_ushii_00709_mRNA_11.1 | -                    |
| GF003840 | 0                      | 1                | 0                 | Hypothetical protein (1)                                                               |                                                                                                                                                                                                                                                         |                                                                                                                                                                                                                                                                                | -                         | C_ushii_00709_mRNA_10.1 | -                    |
| GF003839 | 0                      | 1                | 0                 | Hypothetical protein (1)                                                               |                                                                                                                                                                                                                                                         | Gag-polypeptide of LTR copia-type [IPR029472] (1)                                                                                                                                                                                                                              | -                         | C_ushii_00708_mRNA_4.1  | -                    |
| GF003838 | 0                      | 1                | 0                 | Hypothetical protein (1)                                                               |                                                                                                                                                                                                                                                         |                                                                                                                                                                                                                                                                                | -                         | C_ushii_00708_mRNA_12.1 | -                    |
| GF003837 | 0                      | 1                | 0                 | Hypothetical protein (1)                                                               |                                                                                                                                                                                                                                                         | SGNH hydrolase-type esterase domain [IPR013830] (1)                                                                                                                                                                                                                            | -                         | C_ushii_00708_mRNA_1.1  | -                    |
| GF003836 | 0                      | 1                | 0                 | Hypothetical protein (1)                                                               |                                                                                                                                                                                                                                                         | Formin, FH2 domain [IPR015425] (1); Isoprenoid synthase domain [IPR008949] (1); Terpene synthase, metal-binding domain [IPR005630] (1); Terpene synthase, N-terminal domain [IPR001906] (1); Terpenoid cyclase/protein prenyltransferase alpha-alpha toroid [IPR008910] (1)    | -                         | C_ushii_00707_mRNA_9.1  | -                    |
| GF003835 | 0                      | 1                | 0                 | Isoprene synthase (1)                                                                  | metabolic process [GO:0008152 biological_process] (1); heme activity [GO:0016829 molecular_function] (1); terpene synthase activity [GO:0010333 molecular_function] (1); magnesium ion binding [GO:0000287 molecular_function] (1)                      | Formin, FH2 domain [IPR015425] (1); Isoprenoid synthase domain [IPR008949] (1); Terpene synthase, metal-binding domain [IPR005630] (1); Terpene synthase, N-terminal domain [IPR001906] (1); Terpenoid cyclase/protein prenyltransferase alpha-alpha toroid [IPR008910] (1)    | -                         | C_ushii_00707_mRNA_5.1  | -                    |
| GF003834 | 0                      | 1                | 0                 | Hypothetical protein (1)                                                               | protein binding [GO:0005515 molecular_function] (1)                                                                                                                                                                                                     | Kech-type beta propeller [IPR015915] (1)                                                                                                                                                                                                                                       | -                         | C_ushii_00707_mRNA_3.1  | -                    |
| GF003833 | 0                      | 1                | 0                 | Hypothetical protein (1)                                                               | protein kinase activity [GO:0004672 molecular_function] (1); protein phosphorylation [GO:0006608 biological_process] (1); ATP binding [GO:0005524 molecular_function] (1)                                                                               | Protein kinase-like domain [IPR011009] (1); Protein kinase domain [IPR000719] (1)                                                                                                                                                                                              | -                         | C_ushii_00707_mRNA_12.2 | -                    |
| GF003832 | 0                      | 1                | 0                 | Hypothetical protein (1)                                                               |                                                                                                                                                                                                                                                         | Alpha-gamma-adaptin-binding protein p34 [IPR019341] (1)                                                                                                                                                                                                                        | -                         | C_ushii_00706_mRNA_2.1  | -                    |
| GF003831 | 0                      | 1                | 0                 | Hypothetical protein (1)                                                               | proteolysis [GO:0005508 biological_process] (1); serine-type endopeptidase activity [GO:0004252 molecular_function] (1)                                                                                                                                 | Peptidase S8, subtilisin-related [IPR015500] (1); PA domain [IPR003137] (1); Peptidase S8/S53 domain [IPR000099] (1); Peptidase S8 propeptide/protease inhibitor I9 [IPR010259] (1)                                                                                            | -                         | C_ushii_00706_mRNA_16.1 | -                    |
| GF003830 | 0                      | 1                | 0                 | RNA recognition motif-containing protein (1)                                           | nucleic acid binding [GO:0003676 molecular_function] (1); nucleoside binding [GO:0000166 molecular_function] (1)                                                                                                                                        | RNA recognition motif domain [IPR000504] (1); Nucleotide-binding alpha-beta strand domain [IPR012077] (1)                                                                                                                                                                      | -                         | C_ushii_00706_mRNA_11.1 | -                    |
| GF003829 | 0                      | 1                | 0                 | Hypothetical protein (1)                                                               |                                                                                                                                                                                                                                                         |                                                                                                                                                                                                                                                                                | -                         | C_ushii_00705_mRNA_6.1  | -                    |
| GF003828 | 0                      | 1                | 0                 | ScpIn (1)                                                                              | lipid storage [GO:0019915 biological_process] (1)                                                                                                                                                                                                       | ScpIn family [IPR009617] (1)                                                                                                                                                                                                                                                   | -                         | C_ushii_00705_mRNA_4.1  | -                    |
| GF003827 | 0                      | 1                | 0                 | Hypothetical protein (1)                                                               |                                                                                                                                                                                                                                                         | Reverse transcriptase zinc-binding domain [IPR026960] (1)                                                                                                                                                                                                                      | -                         | C_ushii_00705_mRNA_11.1 | -                    |
| GF003826 | 0                      | 1                | 0                 | Hypothetical protein (1)                                                               | nucleic acid binding [GO:0003676 molecular_function] (1)                                                                                                                                                                                                | Ribonuclease H-like domain [IPR012337] (1)                                                                                                                                                                                                                                     | -                         | C_ushii_00705_mRNA_10.1 | -                    |
| GF003825 | 0                      | 1                | 0                 | Hypothetical protein (1)                                                               |                                                                                                                                                                                                                                                         | Reverse transcriptase zinc-binding domain [IPR026960] (1)                                                                                                                                                                                                                      | -                         | C_ushii_00705_mRNA_1.1  | -                    |
| GF003824 | 0                      | 1                | 0                 | Protein SUR2, putative (1)                                                             | oxidoreductase activity [GO:0016491 molecular_function] (1); oxidation-reduction process [GO:0005114 biological_process] (1); iron ion binding [GO:0005506 molecular_function] (1); fatty acid biosynthetic process [GO:0006633 biological_process] (1) | Fatty acid hydrolyase [IPR006694] (1)                                                                                                                                                                                                                                          | -                         | C_ushii_00704_mRNA_6.1  | -                    |
| GF003823 | 0                      | 1                | 0                 | Hypothetical protein (1)                                                               |                                                                                                                                                                                                                                                         |                                                                                                                                                                                                                                                                                | -                         | C_ushii_00704_mRNA_19.1 | -                    |

| ID        | Num. in <i>C. crottensteini</i> | Num. in <i>C. auribis</i> | Num. in <i>P. trifida</i> | Note                                                                                                                 | GO                                                                                                                                                                                                                                                                                                                 | InterPro                                                                                                                                                                                                                                                                                                                     | Members in <i>C. crottensteini</i> | Members in <i>C. auribis</i> | Members in <i>P. trifida</i> |
|-----------|---------------------------------|---------------------------|---------------------------|----------------------------------------------------------------------------------------------------------------------|--------------------------------------------------------------------------------------------------------------------------------------------------------------------------------------------------------------------------------------------------------------------------------------------------------------------|------------------------------------------------------------------------------------------------------------------------------------------------------------------------------------------------------------------------------------------------------------------------------------------------------------------------------|------------------------------------|------------------------------|------------------------------|
| GF0038522 | 0                               | 1                         | 1                         | DNA-directed RNA polymerase II non-catalytic subunit (1)                                                             | nucleic acid binding [GO:0003676 molecular_function] (1); DNA-directed RNA polymerase activity [GO:0003899 molecular_function] (1); transcription, DNA-templated [GO:0006351 biological_process] (1)                                                                                                               | RNA polymerase Rpb7, N-terminal [IPR05576] (1); Nucleic acid-binding, ORF-604 [IPR012340] (1); S1 domain [IPR000291] (1)                                                                                                                                                                                                     | -                                  | C_unihis_00703_mRNA_7,1      | -                            |
| GF0038521 | 0                               | 1                         | 1                         | Hypothetical protein (1)                                                                                             | -                                                                                                                                                                                                                                                                                                                  | -                                                                                                                                                                                                                                                                                                                            | -                                  | C_unihis_00703_mRNA_4,1      | -                            |
| GF0038520 | 0                               | 1                         | 1                         | Hypothetical protein (1)                                                                                             | -                                                                                                                                                                                                                                                                                                                  | -                                                                                                                                                                                                                                                                                                                            | -                                  | C_unihis_00702_mRNA_16,1     | -                            |
| GF0038519 | 0                               | 1                         | 1                         | Senescence-related gene 1 (1)                                                                                        | oxidoreductase activity [GO:0016401 molecular_function] (1); oxidation-reduction process [GO:0055114 biological_process] (1)                                                                                                                                                                                       | Non-haem dyxygenase N-terminal domain [IPR020992] (1); Isopenicillin N synthase-like [IPR021412] (1); Oxoglutarate-iron-dependent dyxygenase [IPR005123] (4)                                                                                                                                                                 | -                                  | C_unihis_00702_mRNA_14,1     | -                            |
| GF0038518 | 0                               | 1                         | 1                         | Hypothetical protein (1)                                                                                             | -                                                                                                                                                                                                                                                                                                                  | Protein of unknown function DUF247, plant [IPR004156] (1)                                                                                                                                                                                                                                                                    | -                                  | C_unihis_00701_mRNA_7,1      | -                            |
| GF0038517 | 0                               | 1                         | 1                         | DNA-directed RNA polymerase, alpha subunit (1)                                                                       | DNA binding [GO:0003677 molecular_function] (1); protein dimerization activity [GO:0046983 molecular_function] (1); DNA-directed RNA polymerase activity [GO:0003899 molecular_function] (1); transcription, DNA-templated [GO:0006351 biological_process] (1)                                                     | RNA polymerase, alpha subunit, C-terminal [IPR012601] (1); DNA-directed RNA polymerase, alpha subunit [IPR011773] (1); DNA-directed RNA polymerase, RPB1-like dimerization domain [IPR009025] (1); DNA-directed RNA polymerase, RpoA/D/Rpb8-type [IPR012621] (1); DNA-directed RNA polymerase, insert domain [IPR012622] (1) | -                                  | C_unihis_00701_mRNA_22,1     | -                            |
| GF0038516 | 0                               | 1                         | 1                         | 30S ribosomal protein S11, chlorophytic (1)                                                                          | structural constituent of ribosome [GO:0003735 molecular_function] (1); translation [GO:0006412 biological_process] (1); ribosome [GO:0005840 cellular_component] (1)                                                                                                                                              | Ribosomal S11, conserved site [IPR018102] (1); Ribosomal protein S11 [IPR019711] (1)                                                                                                                                                                                                                                         | -                                  | C_unihis_00701_mRNA_21,1     | -                            |
| GF0038515 | 0                               | 1                         | 1                         | Hypothetical protein (1)                                                                                             | proteolysis [GO:0006508 biological_process] (1); cysteine-type peptidase activity [GO:0008234 molecular_function] (1)                                                                                                                                                                                              | Ulp1 protease family, C-terminal catalytic domain [IPR003653] (1)                                                                                                                                                                                                                                                            | -                                  | C_unihis_00701_mRNA_20,1     | -                            |
| GF0038514 | 0                               | 1                         | 1                         | Transposase (1)                                                                                                      | -                                                                                                                                                                                                                                                                                                                  | Transposon, En/Spm-like [IPR004242] (1)                                                                                                                                                                                                                                                                                      | -                                  | C_unihis_00701_mRNA_2,1      | -                            |
| GF0038513 | 0                               | 1                         | 1                         | Hypothetical protein (1)                                                                                             | catalytic activity [GO:0003824 molecular_function] (1)                                                                                                                                                                                                                                                             | Six-hairpin glycosidase [IPR012341] (1); MULE transposase domain [IPR015289] (1)                                                                                                                                                                                                                                             | -                                  | C_unihis_00701_mRNA_18,1     | -                            |
| GF0038512 | 0                               | 1                         | 1                         | Ribonuclease P/MRP protein subunit POP5 (1)                                                                          | tRNA processing [GO:0008033 biological_process] (1); ribonuclease activity [GO:0004840 molecular_function] (1)                                                                                                                                                                                                     | Ribonuclease P/MRP protein subunit [IPR002759] (4)                                                                                                                                                                                                                                                                           | -                                  | C_unihis_00701_mRNA_16,1     | -                            |
| GF0038511 | 0                               | 1                         | 1                         | Hypothetical protein (1)                                                                                             | -                                                                                                                                                                                                                                                                                                                  | -                                                                                                                                                                                                                                                                                                                            | -                                  | C_unihis_00701_mRNA_15,1     | -                            |
| GF0038510 | 0                               | 1                         | 1                         | Hypothetical protein (1)                                                                                             | -                                                                                                                                                                                                                                                                                                                  | -                                                                                                                                                                                                                                                                                                                            | -                                  | C_unihis_00701_mRNA_13,1     | -                            |
| GF0038509 | 0                               | 1                         | 1                         | Putative TNP2 like transposable element (1)                                                                          | -                                                                                                                                                                                                                                                                                                                  | -                                                                                                                                                                                                                                                                                                                            | -                                  | C_unihis_00701_mRNA_1,1      | -                            |
| GF0038508 | 0                               | 1                         | 1                         | Protein TRANSPARENT TESTA 12 (1)                                                                                     | antipporter activity [GO:0015297 molecular_function] (1); drug transmembrane transporter activity [GO:0015238 molecular_function] (1); membrane [GO:0016020 cellular_component] (1); drug transmembrane transport [GO:0006855 biological_process] (1); transmembrane transport [GO:0055085 biological_process] (1) | Multi antimicrobial extrusion protein [IPR02528] (1)                                                                                                                                                                                                                                                                         | -                                  | C_unihis_00700_mRNA_6,1      | -                            |
| GF0038507 | 0                               | 1                         | 1                         | Hypothetical protein (1)                                                                                             | -                                                                                                                                                                                                                                                                                                                  | -                                                                                                                                                                                                                                                                                                                            | -                                  | C_unihis_00700_mRNA_2,1      | -                            |
| GF0038506 | 0                               | 1                         | 1                         | Hypothetical protein (1)                                                                                             | -                                                                                                                                                                                                                                                                                                                  | -                                                                                                                                                                                                                                                                                                                            | -                                  | C_unihis_00700_mRNA_16,1     | -                            |
| GF0038505 | 0                               | 1                         | 1                         | Hypothetical protein (1)                                                                                             | -                                                                                                                                                                                                                                                                                                                  | -                                                                                                                                                                                                                                                                                                                            | -                                  | C_unihis_00699_mRNA_7,1      | -                            |
| GF0038504 | 0                               | 1                         | 1                         | Hypothetical protein (1)                                                                                             | integral component of membrane [GO:0016022 cellular_component] (1)                                                                                                                                                                                                                                                 | EXS, C-terminal [IPR004342] (1)                                                                                                                                                                                                                                                                                              | -                                  | C_unihis_00699_mRNA_3,1      | -                            |
| GF0038503 | 0                               | 1                         | 1                         | Far-red impaired response protein-like (1)                                                                           | regulation of transcription, DNA-templated [GO:0006355 biological_process] (1)                                                                                                                                                                                                                                     | FHY3/FAR1 family [IPR011052] (1)                                                                                                                                                                                                                                                                                             | -                                  | C_unihis_00698_mRNA_6,1      | -                            |
| GF0038502 | 0                               | 1                         | 1                         | Hypothetical protein (1)                                                                                             | -                                                                                                                                                                                                                                                                                                                  | -                                                                                                                                                                                                                                                                                                                            | -                                  | C_unihis_00698_mRNA_5,1      | -                            |
| GF0038501 | 0                               | 1                         | 1                         | Hypothetical protein (1)                                                                                             | protein dimerization activity [GO:0046983 molecular_function] (1); nucleic acid binding [GO:0003676 molecular_function] (1)                                                                                                                                                                                        | Ribonuclease H-like domain [IPR012337] (1); HAT, C-terminal dimerization domain [IPR009060] (1)                                                                                                                                                                                                                              | -                                  | C_unihis_00697_mRNA_8,1      | -                            |
| GF0038500 | 0                               | 1                         | 1                         | Hypothetical protein (1)                                                                                             | regulation of transcription, DNA-templated [GO:0006355 biological_process] (1)                                                                                                                                                                                                                                     | FHY3/FAR1 family [IPR011052] (1); MULE transposase domain [IPR015289] (1)                                                                                                                                                                                                                                                    | -                                  | C_unihis_00697_mRNA_5,1      | -                            |
| GF0038499 | 0                               | 1                         | 1                         | Hypothetical protein (1)                                                                                             | DNA binding [GO:0003677 molecular_function] (1); integral component of membrane [GO:0016022 cellular_component] (1)                                                                                                                                                                                                | Purine permease, plant [IPR001812] (1); Myb-like domain [IPR017977] (1); Homodomain-like [IPR009057] (4)                                                                                                                                                                                                                     | -                                  | C_unihis_00697_mRNA_4,1      | -                            |
| GF0038498 | 0                               | 1                         | 1                         | Hypothetical protein (1)                                                                                             | nucleic acid binding [GO:0003676 molecular_function] (1)                                                                                                                                                                                                                                                           | Ribonuclease H-like domain [IPR012337] (1)                                                                                                                                                                                                                                                                                   | -                                  | C_unihis_00696_mRNA_3,1      | -                            |
| GF0038497 | 0                               | 1                         | 1                         | DDT domain-containing protein, putative isoform 5 (1)                                                                | -                                                                                                                                                                                                                                                                                                                  | DDT domain, subgroup [IPR018500] (1); DDT domain [IPR004022] (1); WSTE Act1/Zip146 [IPR013146] (1); DDT domain superfamily [IPR018501] (1)                                                                                                                                                                                   | -                                  | C_unihis_00696_mRNA_16,1     | -                            |
| GF0038496 | 0                               | 1                         | 1                         | Pre-mRNA-splicing factor rae1 (1)                                                                                    | nucleic acid binding [GO:0003676 molecular_function] (1)                                                                                                                                                                                                                                                           | Domain of unknown function DUF449 [IPR025521] (4)                                                                                                                                                                                                                                                                            | -                                  | C_unihis_00696_mRNA_1,1      | -                            |
| GF0038495 | 0                               | 1                         | 1                         | Hypothetical protein (1)                                                                                             | -                                                                                                                                                                                                                                                                                                                  | -                                                                                                                                                                                                                                                                                                                            | -                                  | C_unihis_00694_mRNA_13,1     | -                            |
| GF0038494 | 0                               | 1                         | 1                         | Putative non-TR retroelement reverse transcriptase (1)                                                               | nucleic acid binding [GO:0003676 molecular_function] (1)                                                                                                                                                                                                                                                           | Reverse transcriptase zinc-binding domain [IPR026960] (1); Ribonuclease H-like domain [IPR012337] (1)                                                                                                                                                                                                                        | -                                  | C_unihis_00694_mRNA_12,1     | -                            |
| GF0038493 | 0                               | 1                         | 1                         | Hypothetical protein (1)                                                                                             | -                                                                                                                                                                                                                                                                                                                  | -                                                                                                                                                                                                                                                                                                                            | -                                  | C_unihis_00694_mRNA_1,1      | -                            |
| GF0038492 | 0                               | 1                         | 1                         | Hypothetical protein (1)                                                                                             | -                                                                                                                                                                                                                                                                                                                  | -                                                                                                                                                                                                                                                                                                                            | -                                  | C_unihis_00693_mRNA_7,1      | -                            |
| GF0038491 | 0                               | 1                         | 1                         | Hypothetical protein (1)                                                                                             | -                                                                                                                                                                                                                                                                                                                  | -                                                                                                                                                                                                                                                                                                                            | -                                  | C_unihis_00693_mRNA_6,1      | -                            |
| GF0038490 | 0                               | 1                         | 1                         | RNA-directed DNA polymerase (Reverse transcriptase), Polynucleotide transferase, Ribonuclease H 66d-like protein (1) | metabolic process [GO:0008132 biological_process] (1); RNA, DNA hybrid ribonuclease activity [GO:0004523 molecular_function] (1); nucleic acid binding [GO:0003676 molecular_function] (1); transference activity, transferring holoxy group [GO:0016758 molecular_function] (1)                                   | UDP-glucuronosyl/UDP-galactosyltransferase [IPR002231] (1); Ribonuclease H domain [IPR001156] (1); Reverse transcriptase zinc-binding domain [IPR026960] (1); Ribonuclease H-like domain [IPR012337] (1)                                                                                                                     | -                                  | C_unihis_00693_mRNA_2,1      | -                            |
| GF0038489 | 0                               | 1                         | 1                         | Hypothetical protein (1)                                                                                             | -                                                                                                                                                                                                                                                                                                                  | -                                                                                                                                                                                                                                                                                                                            | -                                  | C_unihis_00693_mRNA_16,1     | -                            |
| GF0038488 | 0                               | 1                         | 1                         | Hypothetical protein (1)                                                                                             | -                                                                                                                                                                                                                                                                                                                  | -                                                                                                                                                                                                                                                                                                                            | -                                  | C_unihis_00693_mRNA_13,1     | -                            |
| GF0038487 | 0                               | 1                         | 1                         | Hypothetical protein (1)                                                                                             | -                                                                                                                                                                                                                                                                                                                  | -                                                                                                                                                                                                                                                                                                                            | -                                  | C_unihis_00693_mRNA_1,1      | -                            |
| GF0038486 | 0                               | 1                         | 1                         | Hypothetical protein (1)                                                                                             | -                                                                                                                                                                                                                                                                                                                  | -                                                                                                                                                                                                                                                                                                                            | -                                  | C_unihis_00692_mRNA_2,1      | -                            |
| GF0038485 | 0                               | 1                         | 1                         | TMV resistance N1 (1)                                                                                                | -                                                                                                                                                                                                                                                                                                                  | Leucine-rich repeat 3 [IPR017113] (1)                                                                                                                                                                                                                                                                                        | -                                  | C_unihis_00692_mRNA_18,1     | -                            |
| GF0038484 | 0                               | 1                         | 1                         | Hypothetical protein (1)                                                                                             | -                                                                                                                                                                                                                                                                                                                  | -                                                                                                                                                                                                                                                                                                                            | -                                  | C_unihis_00691_mRNA_8,1      | -                            |
| GF0038483 | 0                               | 1                         | 1                         | Hypothetical protein (1)                                                                                             | -                                                                                                                                                                                                                                                                                                                  | -                                                                                                                                                                                                                                                                                                                            | -                                  | C_unihis_00691_mRNA_3,1      | -                            |
| GF0038482 | 0                               | 1                         | 1                         | Hypothetical protein (1)                                                                                             | -                                                                                                                                                                                                                                                                                                                  | -                                                                                                                                                                                                                                                                                                                            | -                                  | C_unihis_00691_mRNA_15,1     | -                            |
| GF0038481 | 0                               | 1                         | 1                         | Cytosolic ribonucleoside 5'-nucleotidylphosphate ribonucleobiphosphate (1)                                           | -                                                                                                                                                                                                                                                                                                                  | LOG family [IPR031100] (1)                                                                                                                                                                                                                                                                                                   | -                                  | C_unihis_00691_mRNA_12,1     | -                            |
| GF0038480 | 0                               | 1                         | 1                         | Hypothetical protein (1)                                                                                             | -                                                                                                                                                                                                                                                                                                                  | -                                                                                                                                                                                                                                                                                                                            | -                                  | C_unihis_00691_mRNA_10,1     | -                            |
| GF0038479 | 0                               | 1                         | 1                         | Cdkc-type zinc finger RING-U-box protein (1)                                                                         | ubiquitin-protein transferase activity [GO:0004842 molecular_function] (1); protein ubiquitination [GO:0016567 biological_process] (1); zinc ion binding [GO:0008270 molecular_function] (1); protein binding [GO:0008270 molecular_function] (1)                                                                  | Zinc finger, CHC4 RING-type [IPR018973] (1); Zinc finger RING-FYVE-PHD-type [IPR013083] (1); HR domain [IPR020207] (1); Zinc finger, RING-type [IPR001841] (1); Zinc finger, RING-type, conserved site [IPR017907] (1); E3 ubiquitin ligase RBR family [IPR031127] (1)                                                       | -                                  | C_unihis_00690_mRNA_4,1      | -                            |
| GF0038478 | 0                               | 1                         | 1                         | RING zinc finger protein, putative (1)                                                                               | ubiquitin-protein transferase activity [GO:0004842 molecular_function] (1); protein ubiquitination [GO:0016567 biological_process] (1); protein binding [GO:0008270 molecular_function] (1)                                                                                                                        | Zinc finger, RING-FYVE-PHD-type [IPR013083] (1); Zinc finger, RING-type [IPR001841] (1); E3 ubiquitin ligase RBR family [IPR031127] (1); Zinc finger, RING-type, conserved site [IPR017907] (1)                                                                                                                              | -                                  | C_unihis_00690_mRNA_3,1      | -                            |
| GF0038477 | 0                               | 1                         | 1                         | Hypothetical protein (1)                                                                                             | methyltransferase activity [GO:0008168 molecular_function] (1)                                                                                                                                                                                                                                                     | Putative S-adenosyl-L-methionine-dependent methyltransferase [IPR004159] (1)                                                                                                                                                                                                                                                 | -                                  | C_unihis_00689_mRNA_8,1      | -                            |
| GF0038476 | 0                               | 1                         | 1                         | Hypothetical protein (1)                                                                                             | ADP binding [GO:0043531 molecular_function] (1)                                                                                                                                                                                                                                                                    | NB-ARC [IPR002182] (1)                                                                                                                                                                                                                                                                                                       | -                                  | C_unihis_00689_mRNA_4,1      | -                            |
| GF0038475 | 0                               | 1                         | 1                         | Hypothetical protein (1)                                                                                             | -                                                                                                                                                                                                                                                                                                                  | -                                                                                                                                                                                                                                                                                                                            | -                                  | C_unihis_00689_mRNA_3,1      | -                            |
| GF0038474 | 0                               | 1                         | 1                         | Hypothetical protein (1)                                                                                             | -                                                                                                                                                                                                                                                                                                                  | -                                                                                                                                                                                                                                                                                                                            | -                                  | C_unihis_00689_mRNA_2,1      | -                            |
| GF0038473 | 0                               | 1                         | 1                         | Hypothetical protein (1)                                                                                             | -                                                                                                                                                                                                                                                                                                                  | -                                                                                                                                                                                                                                                                                                                            | -                                  | C_unihis_00689_mRNA_15,1     | -                            |
| GF0038472 | 0                               | 1                         | 1                         | Hypothetical protein (1)                                                                                             | -                                                                                                                                                                                                                                                                                                                  | Reverse transcriptase domain [IPR004077] (4)                                                                                                                                                                                                                                                                                 | -                                  | C_unihis_00689_mRNA_14,1     | -                            |
| GF0038471 | 0                               | 1                         | 1                         | Hypothetical protein (1)                                                                                             | -                                                                                                                                                                                                                                                                                                                  | -                                                                                                                                                                                                                                                                                                                            | -                                  | C_unihis_00689_mRNA_12,1     | -                            |
| GF0038470 | 0                               | 1                         | 1                         | Leucine-rich repeat protein kinase family, putative (1)                                                              | protein kinase activity [GO:0004672 molecular_function] (1); protein phosphorylation [GO:0006060 biological_process] (1); ATP binding [GO:0005524 molecular_function] (1)                                                                                                                                          | Protein kinase-like domain [IPR011099] (1); Protein kinase domain [IPR000719] (1); Serine-threonine/tyrosine-protein kinase catalytic domain [IPR001245] (1)                                                                                                                                                                 | -                                  | C_unihis_00689_mRNA_10,1     | -                            |
| GF0038469 | 0                               | 1                         | 1                         | Hypothetical protein (1)                                                                                             | -                                                                                                                                                                                                                                                                                                                  | -                                                                                                                                                                                                                                                                                                                            | -                                  | C_unihis_00688_mRNA_8,1      | -                            |
| GF0038468 | 0                               | 1                         | 1                         | Mosses/birds transport protein (1)                                                                                   | -                                                                                                                                                                                                                                                                                                                  | -                                                                                                                                                                                                                                                                                                                            | -                                  | C_unihis_00688_mRNA_7,1      | -                            |
| GF0038467 | 0                               | 1                         | 1                         | Hypothetical protein (1)                                                                                             | -                                                                                                                                                                                                                                                                                                                  | -                                                                                                                                                                                                                                                                                                                            | -                                  | C_unihis_00688_mRNA_4,1      | -                            |
| GF0038466 | 0                               | 1                         | 1                         | Hypothetical protein (1)                                                                                             | -                                                                                                                                                                                                                                                                                                                  | -                                                                                                                                                                                                                                                                                                                            | -                                  | C_unihis_00688_mRNA_3,1      | -                            |
| GF0038465 | 0                               | 1                         | 1                         | Hypothetical protein (1)                                                                                             | -                                                                                                                                                                                                                                                                                                                  | -                                                                                                                                                                                                                                                                                                                            | -                                  | C_unihis_00688_mRNA_2,1      | -                            |
| GF0038464 | 0                               | 1                         | 1                         | Hypothetical protein (1)                                                                                             | -                                                                                                                                                                                                                                                                                                                  | -                                                                                                                                                                                                                                                                                                                            | -                                  | C_unihis_00688_mRNA_17,1     | -                            |
| GF0038463 | 0                               | 1                         | 1                         | Hypothetical protein (1)                                                                                             | -                                                                                                                                                                                                                                                                                                                  | -                                                                                                                                                                                                                                                                                                                            | -                                  | C_unihis_00688_mRNA_12,1     | -                            |
| GF0038462 | 0                               | 1                         | 1                         | Hypothetical protein (1)                                                                                             | -                                                                                                                                                                                                                                                                                                                  | -                                                                                                                                                                                                                                                                                                                            | -                                  | C_unihis_00688_mRNA_10,1     | -                            |
| GF0038461 | 0                               | 1                         | 1                         | Hypothetical protein (1)                                                                                             | nucleic acid binding [GO:0003676 molecular_function] (1)                                                                                                                                                                                                                                                           | Ribonuclease H-like domain [IPR012337] (1)                                                                                                                                                                                                                                                                                   | -                                  | C_unihis_00687_mRNA_8,1      | -                            |
| GF0038460 | 0                               | 1                         | 1                         | Hypothetical protein (1)                                                                                             | -                                                                                                                                                                                                                                                                                                                  | -                                                                                                                                                                                                                                                                                                                            | -                                  | C_unihis_00686_mRNA_9,1      | -                            |
| GF0038459 | 0                               | 1                         | 1                         | Hypothetical protein (1)                                                                                             | -                                                                                                                                                                                                                                                                                                                  | Protein of unknown function DUF3464 [IPR021855] (1)                                                                                                                                                                                                                                                                          | -                                  | C_unihis_00686_mRNA_2,1      | -                            |
| GF0038458 | 0                               | 1                         | 1                         | Hypothetical protein (1)                                                                                             | -                                                                                                                                                                                                                                                                                                                  | -                                                                                                                                                                                                                                                                                                                            | -                                  | C_unihis_00686_mRNA_11,1     | -                            |
| GF0038457 | 0                               | 1                         | 1                         | Hypothetical protein (1)                                                                                             | -                                                                                                                                                                                                                                                                                                                  | -                                                                                                                                                                                                                                                                                                                            | -                                  | C_unihis_00686_mRNA_10,1     | -                            |
| GF0038456 | 0                               | 1                         | 1                         | Retrovirus-related Pol polyprotein from transposon TNT 1-94 (1)                                                      | -                                                                                                                                                                                                                                                                                                                  | -                                                                                                                                                                                                                                                                                                                            | -                                  | C_unihis_00685_mRNA_7,1      | -                            |
| GF0038455 | 0                               | 1                         | 1                         | Hypothetical protein (1)                                                                                             | -                                                                                                                                                                                                                                                                                                                  | -                                                                                                                                                                                                                                                                                                                            | -                                  | C_unihis_00685_mRNA_3,1      | -                            |
| GF0038454 | 0                               | 1                         | 1                         | Hypothetical protein (1)                                                                                             | -                                                                                                                                                                                                                                                                                                                  | -                                                                                                                                                                                                                                                                                                                            | -                                  | C_unihis_00685_mRNA_12,1     | -                            |

| ID        | Num. in <i>C. crottenstei</i> | Num. in <i>C. caudis</i> | Num. in <i>P. putida</i> | Note                                                        | GO                                                                                                                                                                                                                                                                                                                                                                                                                                      | InterPro                                                                                                                                                                                                                                                                                                                           | Members in <i>C. crottenstei</i> | Members in <i>C. caudis</i> | Members in <i>P. putida</i> |
|-----------|-------------------------------|--------------------------|--------------------------|-------------------------------------------------------------|-----------------------------------------------------------------------------------------------------------------------------------------------------------------------------------------------------------------------------------------------------------------------------------------------------------------------------------------------------------------------------------------------------------------------------------------|------------------------------------------------------------------------------------------------------------------------------------------------------------------------------------------------------------------------------------------------------------------------------------------------------------------------------------|----------------------------------|-----------------------------|-----------------------------|
| GF0038453 | 0                             | 1                        | 1                        | 0 Receptor-like protein kinase FERONIA (1)                  | protein kinase activity [GO:0004672 molecular_function] (1); protein phosphorylation [GO:0006468 biological_process] (1); ATP binding [GO:0005524 molecular_function] (1)                                                                                                                                                                                                                                                               | Protein kinase domain [IPR00719] (1); Maltose-like carbohydrate-binding domain [IPR024788] (1); Concavalin A-like lectin (biscovian domain [IPR013203] (1); Protein kinase-like domain [IPR011609] (1); Protein kinase, ATP binding site [IPR07441] (1); Serine-threonine/tyrosine protein kinase catalytic domain [IPR001245] (1) | -                                | C_ushii_00685_mRNA_11.1     | -                           |
| GF0038452 | 0                             | 1                        | 1                        | 0 Hypothetical protein (1)                                  | zinc ion binding [GO:0008270 molecular_function] (1); nucleic acid binding [GO:0003676 molecular_function] (1); lipid metabolic process [GO:0006629 biological_process] (1)                                                                                                                                                                                                                                                             | Alpha/Beta hydrolase fold [IPR029058] (1); Zinc finger, CCHC-type [IPR001878] (1); Fing1 lipase-like domain [IPR029211] (1)                                                                                                                                                                                                        | -                                | C_ushii_00685_mRNA_10.1     | -                           |
| GF0038451 | 0                             | 1                        | 1                        | 0 Hypothetical protein (1)                                  | -                                                                                                                                                                                                                                                                                                                                                                                                                                       | -                                                                                                                                                                                                                                                                                                                                  | -                                | C_ushii_00684_mRNA_9.1      | -                           |
| GF0038450 | 0                             | 1                        | 1                        | 0 Hypothetical protein (1)                                  | -                                                                                                                                                                                                                                                                                                                                                                                                                                       | -                                                                                                                                                                                                                                                                                                                                  | -                                | C_ushii_00684_mRNA_5.1      | -                           |
| GF0038449 | 0                             | 1                        | 1                        | 0 Hypothetical protein (1)                                  | -                                                                                                                                                                                                                                                                                                                                                                                                                                       | -                                                                                                                                                                                                                                                                                                                                  | -                                | C_ushii_00684_mRNA_4.1      | -                           |
| GF0038448 | 0                             | 1                        | 1                        | 0 Hypothetical protein (1)                                  | protein dimerization activity [GO:0046983 molecular_function] (1)                                                                                                                                                                                                                                                                                                                                                                       | HAT, C-terminal dimerization domain [IPR008906] (1)                                                                                                                                                                                                                                                                                | -                                | C_ushii_00684_mRNA_3.1      | -                           |
| GF0038447 | 0                             | 1                        | 1                        | 0 Hypothetical protein (1)                                  | -                                                                                                                                                                                                                                                                                                                                                                                                                                       | -                                                                                                                                                                                                                                                                                                                                  | -                                | C_ushii_00684_mRNA_15.3     | -                           |
| GF0038446 | 0                             | 1                        | 1                        | 0 Hypothetical protein (1)                                  | -                                                                                                                                                                                                                                                                                                                                                                                                                                       | -                                                                                                                                                                                                                                                                                                                                  | -                                | C_ushii_00684_mRNA_12.1     | -                           |
| GF0038445 | 0                             | 1                        | 1                        | 0 Hypothetical protein (1)                                  | -                                                                                                                                                                                                                                                                                                                                                                                                                                       | -                                                                                                                                                                                                                                                                                                                                  | -                                | C_ushii_00684_mRNA_11.1     | -                           |
| GF0038444 | 0                             | 1                        | 1                        | 0 Hypothetical protein (1)                                  | -                                                                                                                                                                                                                                                                                                                                                                                                                                       | -                                                                                                                                                                                                                                                                                                                                  | -                                | C_ushii_00684_mRNA_1.1      | -                           |
| GF0038443 | 0                             | 1                        | 1                        | 0 Hypothetical protein (1)                                  | -                                                                                                                                                                                                                                                                                                                                                                                                                                       | -                                                                                                                                                                                                                                                                                                                                  | -                                | C_ushii_00683_mRNA_9.1      | -                           |
| GF0038442 | 0                             | 1                        | 1                        | 0 Hypothetical protein (1)                                  | -                                                                                                                                                                                                                                                                                                                                                                                                                                       | -                                                                                                                                                                                                                                                                                                                                  | -                                | C_ushii_00683_mRNA_5.1      | -                           |
| GF0038441 | 0                             | 1                        | 1                        | 0 Hypothetical protein (1)                                  | -                                                                                                                                                                                                                                                                                                                                                                                                                                       | -                                                                                                                                                                                                                                                                                                                                  | -                                | C_ushii_00683_mRNA_3.1      | -                           |
| GF0038440 | 0                             | 1                        | 1                        | 0 Hypothetical protein (1)                                  | -                                                                                                                                                                                                                                                                                                                                                                                                                                       | -                                                                                                                                                                                                                                                                                                                                  | -                                | C_ushii_00683_mRNA_11.1     | -                           |
| GF0038439 | 0                             | 1                        | 1                        | 0 Hypothetical protein (1)                                  | -                                                                                                                                                                                                                                                                                                                                                                                                                                       | -                                                                                                                                                                                                                                                                                                                                  | -                                | C_ushii_00682_mRNA_5.1      | -                           |
| GF0038438 | 0                             | 1                        | 1                        | 0 Hypothetical protein (1)                                  | -                                                                                                                                                                                                                                                                                                                                                                                                                                       | -                                                                                                                                                                                                                                                                                                                                  | -                                | C_ushii_00682_mRNA_2.1      | -                           |
| GF0038437 | 0                             | 1                        | 1                        | 0 Hypothetical protein (1)                                  | -                                                                                                                                                                                                                                                                                                                                                                                                                                       | -                                                                                                                                                                                                                                                                                                                                  | -                                | C_ushii_00682_mRNA_13.1     | -                           |
| GF0038436 | 0                             | 1                        | 1                        | 0 Hypothetical protein (1)                                  | -                                                                                                                                                                                                                                                                                                                                                                                                                                       | -                                                                                                                                                                                                                                                                                                                                  | -                                | C_ushii_00682_mRNA_1.1      | -                           |
| GF0038435 | 0                             | 1                        | 1                        | 0 Hypothetical protein (1)                                  | voltage-gated potassium channel activity [GO:005249 molecular_function] (1); vascular sheath [GO:0005774 cellular_component] (1); cellular potassium ion homeostasis [GO:0030607 biological_process] (1); potassium ion transmembrane transport [GO:0071805 biological_process] (1)                                                                                                                                                     | Two pore domain potassium channel, plant [IPR014113] (1); Potassium channel domain [IPR013999] (1)                                                                                                                                                                                                                                 | -                                | C_ushii_00681_mRNA_7.1      | -                           |
| GF0038434 | 0                             | 1                        | 1                        | 0 Hypothetical protein (1)                                  | -                                                                                                                                                                                                                                                                                                                                                                                                                                       | -                                                                                                                                                                                                                                                                                                                                  | -                                | C_ushii_00681_mRNA_4.1      | -                           |
| GF0038433 | 0                             | 1                        | 1                        | 0 Hypothetical protein (1)                                  | -                                                                                                                                                                                                                                                                                                                                                                                                                                       | -                                                                                                                                                                                                                                                                                                                                  | -                                | C_ushii_00681_mRNA_3.1      | -                           |
| GF0038432 | 0                             | 1                        | 1                        | 0 Hypothetical protein (1)                                  | oxidoreductase activity, acting on paired donors, with incorporation or reduction of molecular oxygen [GO:0016765 molecular_function] (1); oxidation-reduction process [GO:0055114 biological_process] (1); heme binding [GO:0020337 molecular_function] (1); zinc ion binding [GO:0005506 molecular_function] (1)                                                                                                                      | Cytochrome P450 [IPR01128] (1)                                                                                                                                                                                                                                                                                                     | -                                | C_ushii_00681_mRNA_19.1     | -                           |
| GF0038431 | 0                             | 1                        | 1                        | 0 Hypothetical protein (1)                                  | -                                                                                                                                                                                                                                                                                                                                                                                                                                       | -                                                                                                                                                                                                                                                                                                                                  | -                                | C_ushii_00680_mRNA_5.1      | -                           |
| GF0038430 | 0                             | 1                        | 1                        | 0 Hypothetical protein (1)                                  | -                                                                                                                                                                                                                                                                                                                                                                                                                                       | -                                                                                                                                                                                                                                                                                                                                  | -                                | C_ushii_00680_mRNA_4.1      | -                           |
| GF0038429 | 0                             | 1                        | 1                        | 0 Progesterone 5-beta-reductase (1)                         | -                                                                                                                                                                                                                                                                                                                                                                                                                                       | -                                                                                                                                                                                                                                                                                                                                  | -                                | C_ushii_00680_mRNA_3.1      | -                           |
| GF0038428 | 0                             | 1                        | 1                        | 0 Hypothetical protein (1)                                  | -                                                                                                                                                                                                                                                                                                                                                                                                                                       | -                                                                                                                                                                                                                                                                                                                                  | -                                | C_ushii_00680_mRNA_20.1     | -                           |
| GF0038427 | 0                             | 1                        | 1                        | 0 Truncated RB (1)                                          | ADP binding [GO:0043531 molecular_function] (1)                                                                                                                                                                                                                                                                                                                                                                                         | P-loop containing nucleoside triphosphate hydrolase [IPR027417] (1); NB-ARC [IPR003182] (1)                                                                                                                                                                                                                                        | -                                | C_ushii_00680_mRNA_19.1     | -                           |
| GF0038426 | 0                             | 1                        | 1                        | 0 Hypothetical protein (1)                                  | -                                                                                                                                                                                                                                                                                                                                                                                                                                       | -                                                                                                                                                                                                                                                                                                                                  | -                                | C_ushii_00680_mRNA_16.1     | -                           |
| GF0038425 | 0                             | 1                        | 1                        | 0 Proteinase inhibitor (1)                                  | response to wounding [GO:0009611 biological_process] (1); serine-type endopeptidase inhibitor activity [GO:0004867 molecular_function] (1)                                                                                                                                                                                                                                                                                              | Proteinase inhibitor 113, potato inhibitor 1 [IPR008641] (1)                                                                                                                                                                                                                                                                       | -                                | C_ushii_00679_mRNA_15.1     | -                           |
| GF0038424 | 0                             | 1                        | 1                        | 0 Hypothetical protein (1)                                  | -                                                                                                                                                                                                                                                                                                                                                                                                                                       | -                                                                                                                                                                                                                                                                                                                                  | -                                | C_ushii_00679_mRNA_14.1     | -                           |
| GF0038423 | 0                             | 1                        | 1                        | 0 CwY3-like family protein, putative isoform 1 (1)          | -                                                                                                                                                                                                                                                                                                                                                                                                                                       | -                                                                                                                                                                                                                                                                                                                                  | -                                | C_ushii_00679_mRNA_13.1     | -                           |
| GF0038422 | 0                             | 1                        | 1                        | 0 Hycen protein (1)                                         | -                                                                                                                                                                                                                                                                                                                                                                                                                                       | -                                                                                                                                                                                                                                                                                                                                  | -                                | C_ushii_00678_mRNA_7.1      | -                           |
| GF0038421 | 0                             | 1                        | 1                        | 0 Hypothetical protein (1)                                  | -                                                                                                                                                                                                                                                                                                                                                                                                                                       | -                                                                                                                                                                                                                                                                                                                                  | -                                | C_ushii_00678_mRNA_15.1     | -                           |
| GF0038420 | 0                             | 1                        | 1                        | 0 Hypothetical protein (1)                                  | -                                                                                                                                                                                                                                                                                                                                                                                                                                       | -                                                                                                                                                                                                                                                                                                                                  | -                                | C_ushii_00678_mRNA_14.1     | -                           |
| GF0038419 | 0                             | 1                        | 1                        | 0 Hypothetical protein (1)                                  | -                                                                                                                                                                                                                                                                                                                                                                                                                                       | -                                                                                                                                                                                                                                                                                                                                  | -                                | C_ushii_00678_mRNA_12.1     | -                           |
| GF0038418 | 0                             | 1                        | 1                        | 0 Hypothetical protein (1)                                  | -                                                                                                                                                                                                                                                                                                                                                                                                                                       | -                                                                                                                                                                                                                                                                                                                                  | -                                | C_ushii_00678_mRNA_11.1     | -                           |
| GF0038417 | 0                             | 1                        | 1                        | 0 Hypothetical protein (1)                                  | -                                                                                                                                                                                                                                                                                                                                                                                                                                       | -                                                                                                                                                                                                                                                                                                                                  | -                                | C_ushii_00678_mRNA_10.1     | -                           |
| GF0038416 | 0                             | 1                        | 1                        | 0 Hypothetical protein (1)                                  | -                                                                                                                                                                                                                                                                                                                                                                                                                                       | -                                                                                                                                                                                                                                                                                                                                  | -                                | C_ushii_00677_mRNA_9.1      | -                           |
| GF0038415 | 0                             | 1                        | 1                        | 0 Hypothetical protein (1)                                  | -                                                                                                                                                                                                                                                                                                                                                                                                                                       | -                                                                                                                                                                                                                                                                                                                                  | -                                | C_ushii_00677_mRNA_6.1      | -                           |
| GF0038414 | 0                             | 1                        | 1                        | 0 Hypothetical protein (1)                                  | -                                                                                                                                                                                                                                                                                                                                                                                                                                       | -                                                                                                                                                                                                                                                                                                                                  | -                                | C_ushii_00677_mRNA_3.1      | -                           |
| GF0038413 | 0                             | 1                        | 1                        | 0 Hypothetical protein (1)                                  | -                                                                                                                                                                                                                                                                                                                                                                                                                                       | -                                                                                                                                                                                                                                                                                                                                  | -                                | C_ushii_00677_mRNA_11.1     | -                           |
| GF0038412 | 0                             | 1                        | 1                        | 0 CwY1 unidirectional kinase/phosphatase cqs8 isoform 1 (1) | -                                                                                                                                                                                                                                                                                                                                                                                                                                       | -                                                                                                                                                                                                                                                                                                                                  | -                                | C_ushii_00676_mRNA_3.1      | -                           |
| GF0038411 | 0                             | 1                        | 1                        | 0 Hypothetical protein (1)                                  | -                                                                                                                                                                                                                                                                                                                                                                                                                                       | -                                                                                                                                                                                                                                                                                                                                  | -                                | C_ushii_00676_mRNA_15.1     | -                           |
| GF0038410 | 0                             | 1                        | 1                        | 0 Amino acid transporter-like protein (1)                   | -                                                                                                                                                                                                                                                                                                                                                                                                                                       | -                                                                                                                                                                                                                                                                                                                                  | -                                | C_ushii_00676_mRNA_14.1     | -                           |
| GF0038409 | 0                             | 1                        | 1                        | 0 Hypothetical protein (1)                                  | -                                                                                                                                                                                                                                                                                                                                                                                                                                       | -                                                                                                                                                                                                                                                                                                                                  | -                                | C_ushii_00675_mRNA_8.1      | -                           |
| GF0038408 | 0                             | 1                        | 1                        | 0 Hypothetical protein (1)                                  | -                                                                                                                                                                                                                                                                                                                                                                                                                                       | -                                                                                                                                                                                                                                                                                                                                  | -                                | C_ushii_00675_mRNA_4.1      | -                           |
| GF0038407 | 0                             | 1                        | 1                        | 0 tRNA synthetase class I (C) family protein (1)            | aminoacyl-tRNA ligase activity [GO:000412 molecular_function] (1); ATP binding [GO:0005524 molecular_function] (1); molecule binding [GO:0000166 molecular_function] (1); tRNA aminoacylation for protein translation [GO:0006418 biological_process] (1)                                                                                                                                                                               | Rosoman-like alpha/beta alpha sandwich fold [IPR014729] (1); Aminoacyl-tRNA synthetase, class Ia, anticodon-binding [IPR009080] (1); Cystearyl-tRNA synthetase/tyrosyl ligase [IPR024009] (1); tRNA synthetases class I, catalytic domain [IPR02678] (1)                                                                           | -                                | C_ushii_00675_mRNA_14.1     | -                           |
| GF0038406 | 0                             | 1                        | 1                        | 0 Hypothetical protein (1)                                  | -                                                                                                                                                                                                                                                                                                                                                                                                                                       | -                                                                                                                                                                                                                                                                                                                                  | -                                | C_ushii_00675_mRNA_13.1     | -                           |
| GF0038405 | 0                             | 1                        | 1                        | 0 Hypothetical protein (1)                                  | -                                                                                                                                                                                                                                                                                                                                                                                                                                       | -                                                                                                                                                                                                                                                                                                                                  | -                                | C_ushii_00675_mRNA_12.1     | -                           |
| GF0038404 | 0                             | 1                        | 1                        | 0 Hypothetical protein (1)                                  | -                                                                                                                                                                                                                                                                                                                                                                                                                                       | -                                                                                                                                                                                                                                                                                                                                  | -                                | C_ushii_00675_mRNA_11.1     | -                           |
| GF0038403 | 0                             | 1                        | 1                        | 0 Hypothetical protein (1)                                  | protein dimerization activity [GO:0046983 molecular_function] (1); DNA binding [GO:0003677 molecular_function] (1)                                                                                                                                                                                                                                                                                                                      | Transcription factor, MADS-box [IPR002100] (1)                                                                                                                                                                                                                                                                                     | -                                | C_ushii_00675_mRNA_10.1     | -                           |
| GF0038402 | 0                             | 1                        | 1                        | 0 Hypothetical protein (1)                                  | -                                                                                                                                                                                                                                                                                                                                                                                                                                       | -                                                                                                                                                                                                                                                                                                                                  | -                                | C_ushii_00675_mRNA_1.1      | -                           |
| GF0038401 | 0                             | 1                        | 1                        | 0 Hypothetical protein (1)                                  | -                                                                                                                                                                                                                                                                                                                                                                                                                                       | -                                                                                                                                                                                                                                                                                                                                  | -                                | C_ushii_00674_mRNA_6.1      | -                           |
| GF0038400 | 0                             | 1                        | 1                        | 0 Hypothetical protein (1)                                  | -                                                                                                                                                                                                                                                                                                                                                                                                                                       | -                                                                                                                                                                                                                                                                                                                                  | -                                | C_ushii_00674_mRNA_5.1      | -                           |
| GF0038399 | 0                             | 1                        | 1                        | 0 Hypothetical protein (1)                                  | -                                                                                                                                                                                                                                                                                                                                                                                                                                       | -                                                                                                                                                                                                                                                                                                                                  | -                                | C_ushii_00674_mRNA_4.1      | -                           |
| GF0038398 | 0                             | 1                        | 1                        | 0 Hypothetical protein (1)                                  | -                                                                                                                                                                                                                                                                                                                                                                                                                                       | -                                                                                                                                                                                                                                                                                                                                  | -                                | C_ushii_00674_mRNA_14.1     | -                           |
| GF0038397 | 0                             | 1                        | 1                        | 0 Hypothetical protein (1)                                  | -                                                                                                                                                                                                                                                                                                                                                                                                                                       | -                                                                                                                                                                                                                                                                                                                                  | -                                | C_ushii_00674_mRNA_12.1     | -                           |
| GF0038396 | 0                             | 1                        | 1                        | 0 Hypothetical protein (1)                                  | -                                                                                                                                                                                                                                                                                                                                                                                                                                       | -                                                                                                                                                                                                                                                                                                                                  | -                                | C_ushii_00674_mRNA_11.1     | -                           |
| GF0038395 | 0                             | 1                        | 1                        | 0 Hypothetical protein (1)                                  | -                                                                                                                                                                                                                                                                                                                                                                                                                                       | -                                                                                                                                                                                                                                                                                                                                  | -                                | C_ushii_00674_mRNA_10.1     | -                           |
| GF0038394 | 0                             | 1                        | 1                        | 0 Hypothetical protein (1)                                  | -                                                                                                                                                                                                                                                                                                                                                                                                                                       | -                                                                                                                                                                                                                                                                                                                                  | -                                | C_ushii_00674_mRNA_1.1      | -                           |
| GF0038393 | 0                             | 1                        | 1                        | 0 Envelope membrane protein, chloroplast (1)                | acetyl-CoA carboxylase complex [GO:0009117 cellular_component] (1); acetyl-CoA carboxylase activity [GO:0003989 molecular_function] (1); fatty acid biosynthetic process [GO:0006633 biological_process] (1); integral component of membrane [GO:0016022 cellular_component] (1)                                                                                                                                                        | Acetyl-coenzyme A carboxyltransferase, N-terminal [IPR011762] (1); Carboxyl transferase [IPR00022] (1); Chloroplast envelope membrane protein, Cema [IPR004282] (1); Acetyl-CoA carboxylase, carboxyl transferase, beta subunit [IPR000438] (1); ClpP/crotonase-like domain [IPR029051] (1)                                        | -                                | C_ushii_00673_mRNA_9.1      | -                           |
| GF0038392 | 0                             | 1                        | 1                        | 0 RNA polymerase alpha subunit (1)                          | transcription, DNA-templated [GO:0006351 biological_process] (1); DNA-directed RNA polymerase activity [GO:0003939 molecular_function] (1); protein dimerization activity [GO:0046983 molecular_function] (1); translation [GO:0006412 biological_process] (1); intracellular [GO:0005622 cellular_component] (1); structural constituent of ribosome [GO:0003735 molecular_function] (1); ribosome [GO:0005840 cellular_component] (1) | DNA-directed RNA polymerase, insert domain [IPR012621] (1); DNA-directed RNA polymerase, RpoA/D Rpo3-type [IPR011263] (1); DNA-directed RNA polymerase, RBP11-like dimerization domain [IPR009025] (1)                                                                                                                             | -                                | C_ushii_00673_mRNA_8.1      | -                           |
| GF0038391 | 0                             | 1                        | 1                        | 0 30S ribosomal protein S11, chloroplast (1)                | -                                                                                                                                                                                                                                                                                                                                                                                                                                       | -                                                                                                                                                                                                                                                                                                                                  | -                                | C_ushii_00673_mRNA_7.1      | -                           |
| GF0038390 | 0                             | 1                        | 1                        | 0 Translational activator gen1 (1)                          | -                                                                                                                                                                                                                                                                                                                                                                                                                                       | -                                                                                                                                                                                                                                                                                                                                  | -                                | C_ushii_00673_mRNA_3.1      | -                           |
| GF0038389 | 0                             | 1                        | 1                        | 0 Hypothetical protein (1)                                  | -                                                                                                                                                                                                                                                                                                                                                                                                                                       | -                                                                                                                                                                                                                                                                                                                                  | -                                | C_ushii_00673_mRNA_19.1     | -                           |
| GF0038388 | 0                             | 1                        | 1                        | 0 Hypothetical protein (1)                                  | -                                                                                                                                                                                                                                                                                                                                                                                                                                       | -                                                                                                                                                                                                                                                                                                                                  | -                                | C_ushii_00673_mRNA_16.1     | -                           |
| GF0038387 | 0                             | 1                        | 1                        | 0 Hypothetical protein (1)                                  | cysteine-type peptidase activity [GO:0008234 molecular_function] (1); proteolysis [GO:0006508 biological_process] (1)                                                                                                                                                                                                                                                                                                                   | Upl1 protease family, C-terminal catalytic domain [IPR003653] (1)                                                                                                                                                                                                                                                                  | -                                | C_ushii_00673_mRNA_15.1     | -                           |
| GF0038386 | 0                             | 1                        | 1                        | 0 Hypothetical protein (1)                                  | zinc ion binding [GO:0008270 molecular_function] (1); regulation of transcription, DNA-templated [GO:0006355 biological_process] (1)                                                                                                                                                                                                                                                                                                    | FAR1 DNA binding domain [IPR004330] (1); FHY3/FAR1 family [IPR011052] (1); Zinc finger, SWIM-type [IPR007527] (1)                                                                                                                                                                                                                  | -                                | C_ushii_00673_mRNA_14.1     | -                           |
| GF0038385 | 0                             | 1                        | 1                        | 0 50S ribosomal protein L20 (1)                             | -                                                                                                                                                                                                                                                                                                                                                                                                                                       | -                                                                                                                                                                                                                                                                                                                                  | -                                | C_ushii_00673_mRNA_13.1     | -                           |
| GF0038384 | 0                             | 1                        | 1                        | 0 Hypothetical protein (1)                                  | -                                                                                                                                                                                                                                                                                                                                                                                                                                       | -                                                                                                                                                                                                                                                                                                                                  | -                                | C_ushii_00672_mRNA_5.1      | -                           |



| ID        | Num. in <i>C. crotchi</i> | Num. in <i>C. auris</i> | Num. in <i>P. putida</i> | Note                                                  | GO                                                                                                                                                                                                                                                                                                                                                                                                           | InterPro                                                                                                                                                                                                                                                                                                         | Members in <i>C. crotchi</i> | Members in <i>C. auris</i> | Members in <i>P. putida</i> |
|-----------|---------------------------|-------------------------|--------------------------|-------------------------------------------------------|--------------------------------------------------------------------------------------------------------------------------------------------------------------------------------------------------------------------------------------------------------------------------------------------------------------------------------------------------------------------------------------------------------------|------------------------------------------------------------------------------------------------------------------------------------------------------------------------------------------------------------------------------------------------------------------------------------------------------------------|------------------------------|----------------------------|-----------------------------|
| GF0033302 | 0                         | 1                       | 0                        | Hypothetical protein (1)                              |                                                                                                                                                                                                                                                                                                                                                                                                              |                                                                                                                                                                                                                                                                                                                  |                              | C_uni96_0051_mRNA_12.1     | -                           |
| GF0033301 | 0                         | 1                       | 0                        | Hypothetical protein (1)                              |                                                                                                                                                                                                                                                                                                                                                                                                              |                                                                                                                                                                                                                                                                                                                  |                              | C_uni96_0051_mRNA_11.1     | -                           |
| GF0033300 | 0                         | 1                       | 0                        | Hypothetical protein (1)                              |                                                                                                                                                                                                                                                                                                                                                                                                              |                                                                                                                                                                                                                                                                                                                  |                              | C_uni96_0051_mRNA_10.1     | -                           |
| GF0033299 | 0                         | 1                       | 0                        | Hypothetical protein (1)                              |                                                                                                                                                                                                                                                                                                                                                                                                              |                                                                                                                                                                                                                                                                                                                  |                              | C_uni96_0051_mRNA_1.1      | -                           |
| GF0033298 | 0                         | 1                       | 0                        | Hypothetical protein (1)                              |                                                                                                                                                                                                                                                                                                                                                                                                              |                                                                                                                                                                                                                                                                                                                  |                              | C_uni96_0050_mRNA_2.1      | -                           |
| GF0033297 | 0                         | 1                       | 0                        | Pathogenesis-related maize seed protein (1)           | extracellular region [GO:0005576]                                                                                                                                                                                                                                                                                                                                                                            | Ves allergen [IPR002433] (1); Allergen V57-type-1-related conserved site [IPR018244] (1); CAP domain [IPR014044] (1); Cysteine-rich secretory protein allergen V57-type-1-related [IPR01283] (1)                                                                                                                 |                              | C_uni96_0050_mRNA_14.1     | -                           |
| GF0033296 | 0                         | 1                       | 0                        | Hypothetical protein (1)                              |                                                                                                                                                                                                                                                                                                                                                                                                              | Trichome brefingence-like family [IPR02962] (1); PC-kinase [IPR026057] (1); Protein trichome brefingence-like 13 [IPR029608] (1)                                                                                                                                                                                 |                              | C_uni96_0050_mRNA_13.1     | -                           |
| GF0033295 | 0                         | 1                       | 0                        | Branched-chain-amino acid transaminase (1)            | metabolic process [GO:0008152] biological process (1); catalytic activity [GO:0003524 molecular_function] (1); branched-chain amino acid metabolic process [GO:0009081 biological_process] (1); branched-chain-amino-acid transaminase activity [GO:0004084 molecular_function] (1)                                                                                                                          | Branched-chain amino acid aminotransferase-II [IPR005786] (1); Aminotransferase class IV [IPR001544] (1)                                                                                                                                                                                                         |                              | C_uni96_0050_mRNA_12.1     | -                           |
| GF0033294 | 0                         | 1                       | 0                        | Hypothetical protein (1)                              |                                                                                                                                                                                                                                                                                                                                                                                                              |                                                                                                                                                                                                                                                                                                                  |                              | C_uni96_0050_mRNA_10.1     | -                           |
| GF0033293 | 0                         | 1                       | 0                        | Hypothetical protein (1)                              |                                                                                                                                                                                                                                                                                                                                                                                                              |                                                                                                                                                                                                                                                                                                                  |                              | C_uni96_0049_mRNA_2.1      | -                           |
| GF0033292 | 0                         | 1                       | 0                        | Hypothetical protein (1)                              |                                                                                                                                                                                                                                                                                                                                                                                                              |                                                                                                                                                                                                                                                                                                                  |                              | C_uni96_0049_mRNA_6.1      | -                           |
| GF0033291 | 0                         | 1                       | 0                        | Hypothetical protein (1)                              |                                                                                                                                                                                                                                                                                                                                                                                                              | Aspartic peptidase domain [IPR021109] (1)                                                                                                                                                                                                                                                                        |                              | C_uni96_0049_mRNA_3.1      | -                           |
| GF0033290 | 0                         | 1                       | 0                        | Hypothetical protein (1)                              |                                                                                                                                                                                                                                                                                                                                                                                                              |                                                                                                                                                                                                                                                                                                                  |                              | C_uni96_0049_mRNA_2.1      | -                           |
| GF0033289 | 0                         | 1                       | 0                        | Hypothetical protein (1)                              | response to auxin [GO:0009733 biological_process] (1)                                                                                                                                                                                                                                                                                                                                                        | Small auxin-up RNA [IPR003676] (1)                                                                                                                                                                                                                                                                               |                              | C_uni96_0049_mRNA_11.1     | -                           |
| GF0033288 | 0                         | 1                       | 0                        | Hypothetical protein (1)                              |                                                                                                                                                                                                                                                                                                                                                                                                              |                                                                                                                                                                                                                                                                                                                  |                              | C_uni96_0048_mRNA_8.1      | -                           |
| GF0033287 | 0                         | 1                       | 0                        | Hypothetical protein (1)                              |                                                                                                                                                                                                                                                                                                                                                                                                              |                                                                                                                                                                                                                                                                                                                  |                              | C_uni96_0048_mRNA_7.1      | -                           |
| GF0033286 | 0                         | 1                       | 0                        | Hypothetical protein (1)                              |                                                                                                                                                                                                                                                                                                                                                                                                              | Domain of unknown function DUF4283 [IPR025558] (1); Reverse transcriptase domain [IPR000477] (1); Endonuclease/exonuclease/phosphatase [IPR005185] (4)                                                                                                                                                           |                              | C_uni96_0048_mRNA_5.1      | -                           |
| GF0033285 | 0                         | 1                       | 0                        | Leucine-rich repeat protein kinase family protein (1) | protein binding [GO:0005515 molecular_function] (1)                                                                                                                                                                                                                                                                                                                                                          | Leucine-rich repeat domain, I domain-like [IPR02675] (1); Leucine-rich repeat [IPR016111] (1)                                                                                                                                                                                                                    |                              | C_uni96_0048_mRNA_4.1      | -                           |
| GF0033284 | 0                         | 1                       | 0                        | Hypothetical protein (1)                              |                                                                                                                                                                                                                                                                                                                                                                                                              | ATPase family AAA domain-containing protein 3, domain of unknown function DUF523 [IPR02191] (1)                                                                                                                                                                                                                  |                              | C_uni96_0048_mRNA_3.1      | -                           |
| GF0033283 | 0                         | 1                       | 0                        | Hypothetical protein (1)                              |                                                                                                                                                                                                                                                                                                                                                                                                              |                                                                                                                                                                                                                                                                                                                  |                              | C_uni96_0048_mRNA_2.1      | -                           |
| GF0033282 | 0                         | 1                       | 0                        | Hypothetical protein (1)                              |                                                                                                                                                                                                                                                                                                                                                                                                              | Leucine-rich repeat-containing N-terminal plant-type [IPR012101] (1); Leucine-rich repeat domain, I domain-like [IPR02675] (1)                                                                                                                                                                                   |                              | C_uni96_0048_mRNA_19.1     | -                           |
| GF0033281 | 0                         | 1                       | 0                        | HAT family dimerization domain containing protein (1) | nucleic acid binding [GO:0003676 molecular_function] (1); protein dimerization activity [GO:0046983 molecular_function] (1)                                                                                                                                                                                                                                                                                  | HAT, C-terminal dimerization domain [IPR008906] (1); Ribonuclease H-like domain [IPR012537] (1)                                                                                                                                                                                                                  |                              | C_uni96_0048_mRNA_18.1     | -                           |
| GF0033280 | 0                         | 1                       | 0                        | Hypothetical protein (1)                              |                                                                                                                                                                                                                                                                                                                                                                                                              | Endonuclease/exonuclease/phosphatase [IPR005185] (4)                                                                                                                                                                                                                                                             |                              | C_uni96_0048_mRNA_14.1     | -                           |
| GF0033279 | 0                         | 1                       | 0                        | Hypothetical protein (1)                              | protein kinase activity [GO:0004672 molecular_function] (1); protein phosphorylation [GO:0006468 biological_process] (1); ATP binding [GO:0005524 molecular_function] (1)                                                                                                                                                                                                                                    | Protein kinase-like domain [IPR011009] (1); Protein kinase domain [IPR00719] (1); Serine-threonine/tyrosine-protein kinase catalytic domain [IPR001245] (1)                                                                                                                                                      |                              | C_uni96_0048_mRNA_12.1     | -                           |
| GF0033278 | 0                         | 1                       | 0                        | Hypothetical protein (1)                              |                                                                                                                                                                                                                                                                                                                                                                                                              |                                                                                                                                                                                                                                                                                                                  |                              | C_uni96_0048_mRNA_10.1     | -                           |
| GF0033277 | 0                         | 1                       | 0                        | LRR receptor-like kinase family protein (1)           | protein binding [GO:0005515 molecular_function] (1)                                                                                                                                                                                                                                                                                                                                                          | Leucine-rich repeat-containing N-terminal plant-type [IPR012101] (1); Leucine-rich repeat [IPR016111] (1); Leucine-rich repeat domain, I domain-like [IPR02675] (1)                                                                                                                                              |                              | C_uni96_0048_mRNA_1.1      | -                           |
| GF0033276 | 0                         | 1                       | 0                        | Hypothetical protein (1)                              |                                                                                                                                                                                                                                                                                                                                                                                                              | Quinone alcohol dehydrogenase-like superfamily [IPR011047] (1)                                                                                                                                                                                                                                                   |                              | C_uni96_0046_mRNA_5.1      | -                           |
| GF0033275 | 0                         | 1                       | 0                        | Hypothetical protein (1)                              |                                                                                                                                                                                                                                                                                                                                                                                                              |                                                                                                                                                                                                                                                                                                                  |                              | C_uni96_0046_mRNA_4.1      | -                           |
| GF0033274 | 0                         | 1                       | 0                        | Similar to ATP-binding domain 1 family member B (1)   |                                                                                                                                                                                                                                                                                                                                                                                                              | P-loop containing nucleoside triphosphate hydrolase [IPR027417] (1); GPN-loop GTPase [IPR004130] (1); GPN-loop GTPase 2 [IPR030231] (1)                                                                                                                                                                          |                              | C_uni96_0046_mRNA_21.1     | -                           |
| GF0033273 | 0                         | 1                       | 0                        | Hypothetical protein (1)                              |                                                                                                                                                                                                                                                                                                                                                                                                              | P-loop containing nucleoside triphosphate hydrolase [IPR027417] (1); GPN-loop GTPase [IPR004130] (1); GPN-loop GTPase 2 [IPR030231] (1)                                                                                                                                                                          |                              | C_uni96_0046_mRNA_20.1     | -                           |
| GF0033272 | 0                         | 1                       | 0                        | Hypothetical protein (1)                              |                                                                                                                                                                                                                                                                                                                                                                                                              |                                                                                                                                                                                                                                                                                                                  |                              | C_uni96_0046_mRNA_17.1     | -                           |
| GF0033271 | 0                         | 1                       | 0                        | Hypothetical protein (1)                              |                                                                                                                                                                                                                                                                                                                                                                                                              |                                                                                                                                                                                                                                                                                                                  |                              | C_uni96_0046_mRNA_13.1     | -                           |
| GF0033270 | 0                         | 1                       | 0                        | Hypothetical protein (1)                              |                                                                                                                                                                                                                                                                                                                                                                                                              |                                                                                                                                                                                                                                                                                                                  |                              | C_uni96_0046_mRNA_12.1     | -                           |
| GF0033269 | 0                         | 1                       | 0                        | Hypothetical protein (1)                              |                                                                                                                                                                                                                                                                                                                                                                                                              |                                                                                                                                                                                                                                                                                                                  |                              | C_uni96_0046_mRNA_11.1     | -                           |
| GF0033268 | 0                         | 1                       | 0                        | Hypothetical protein (1)                              |                                                                                                                                                                                                                                                                                                                                                                                                              |                                                                                                                                                                                                                                                                                                                  |                              | C_uni96_0046_mRNA_9.1      | -                           |
| GF0033267 | 0                         | 1                       | 0                        | Hypothetical protein (1)                              |                                                                                                                                                                                                                                                                                                                                                                                                              |                                                                                                                                                                                                                                                                                                                  |                              | C_uni96_0045_mRNA_7.1      | -                           |
| GF0033266 | 0                         | 1                       | 0                        | Hypothetical protein (1)                              |                                                                                                                                                                                                                                                                                                                                                                                                              |                                                                                                                                                                                                                                                                                                                  |                              | C_uni96_0045_mRNA_3.1      | -                           |
| GF0033265 | 0                         | 1                       | 0                        | Hypothetical protein (1)                              |                                                                                                                                                                                                                                                                                                                                                                                                              |                                                                                                                                                                                                                                                                                                                  |                              | C_uni96_0045_mRNA_16.1     | -                           |
| GF0033264 | 0                         | 1                       | 0                        | Hypothetical protein (1)                              | nucleic acid binding [GO:0003676 molecular_function] (1)                                                                                                                                                                                                                                                                                                                                                     | GAG-pro-integrase domain [IPR025724] (1); Ribonuclease H-like domain [IPR012337] (1)                                                                                                                                                                                                                             |                              | C_uni96_0045_mRNA_11.1     | -                           |
| GF0033263 | 0                         | 1                       | 0                        | PQ loop repeat family protein (1)                     |                                                                                                                                                                                                                                                                                                                                                                                                              | PQ loop repeat [IPR006603] (1)                                                                                                                                                                                                                                                                                   |                              | C_uni96_0044_mRNA_5.1      | -                           |
| GF0033262 | 0                         | 1                       | 0                        | Plant cadmium resistance 2 (1)                        |                                                                                                                                                                                                                                                                                                                                                                                                              | PLC-AC motif-containing protein [IPR006461] (1)                                                                                                                                                                                                                                                                  |                              | C_uni96_0044_mRNA_4.1      | -                           |
| GF0033261 | 0                         | 1                       | 0                        | Defective in meristem silencing protein (1)           |                                                                                                                                                                                                                                                                                                                                                                                                              |                                                                                                                                                                                                                                                                                                                  |                              | C_uni96_0044_mRNA_3.1      | -                           |
| GF0033260 | 0                         | 1                       | 0                        | Hypothetical protein (1)                              |                                                                                                                                                                                                                                                                                                                                                                                                              |                                                                                                                                                                                                                                                                                                                  |                              | C_uni96_0044_mRNA_26.1     | -                           |
| GF0033259 | 0                         | 1                       | 0                        | Hypothetical protein (1)                              | DNA repair [GO:0006281 biological_process] (1)                                                                                                                                                                                                                                                                                                                                                               | Fanconi anemia protein FANCD2 [IPR029448] (1)                                                                                                                                                                                                                                                                    |                              | C_uni96_0044_mRNA_25.1     | -                           |
| GF0033258 | 0                         | 1                       | 0                        | Hypothetical protein (1)                              |                                                                                                                                                                                                                                                                                                                                                                                                              |                                                                                                                                                                                                                                                                                                                  |                              | C_uni96_0044_mRNA_24.1     | -                           |
| GF0033257 | 0                         | 1                       | 0                        | Transcription elongation factor A protein 2 (1)       | zinc ion binding [GO:0008270 molecular_function] (1); transcription, DNA-templated [GO:0006351 biological_process] (1); DNA binding [GO:0003677 molecular_function] (1); metal ion binding [GO:0003674 molecular_function] (1); regulation of transcription, elongation [GO:0032784 biological_process] (1); regulation of transcription from RNA polymerase II promoter [GO:0006357 biological_process] (1) | Transcription elongation factor S-4M [IPR017901] (1); Transcription factor IIS, N-terminal [IPR017923] (1); Transcription elongation factor, TFIIS-related [IPR036171] (1); Transcription elongation factor, TFIIS-related [IPR016492] (1); Transcription elongation factor S-II, central domain [IPR005610] (1) |                              | C_uni96_0044_mRNA_1.1      | -                           |
| GF0033256 | 0                         | 1                       | 0                        | Hypothetical protein (1)                              |                                                                                                                                                                                                                                                                                                                                                                                                              |                                                                                                                                                                                                                                                                                                                  |                              | C_uni96_0043_mRNA_8.1      | -                           |
| GF0033255 | 0                         | 1                       | 0                        | Hypothetical protein (1)                              |                                                                                                                                                                                                                                                                                                                                                                                                              |                                                                                                                                                                                                                                                                                                                  |                              | C_uni96_0043_mRNA_5.1      | -                           |
| GF0033254 | 0                         | 1                       | 0                        | Hypothetical protein (1)                              |                                                                                                                                                                                                                                                                                                                                                                                                              |                                                                                                                                                                                                                                                                                                                  |                              | C_uni96_0043_mRNA_4.1      | -                           |
| GF0033253 | 0                         | 1                       | 0                        | Hypothetical protein (1)                              |                                                                                                                                                                                                                                                                                                                                                                                                              |                                                                                                                                                                                                                                                                                                                  |                              | C_uni96_0043_mRNA_3.1      | -                           |
| GF0033252 | 0                         | 1                       | 0                        | Hypothetical protein (1)                              |                                                                                                                                                                                                                                                                                                                                                                                                              |                                                                                                                                                                                                                                                                                                                  |                              | C_uni96_0043_mRNA_11.1     | -                           |
| GF0033251 | 0                         | 1                       | 0                        | Hypothetical protein (1)                              |                                                                                                                                                                                                                                                                                                                                                                                                              |                                                                                                                                                                                                                                                                                                                  |                              | C_uni96_0042_mRNA_15.1     | -                           |
| GF0033250 | 0                         | 1                       | 0                        | Hypothetical protein (1)                              |                                                                                                                                                                                                                                                                                                                                                                                                              | Domain of unknown function DUF4283 [IPR025558] (1); Reverse transcriptase zinc-binding domain [IPR029608] (1)                                                                                                                                                                                                    |                              | C_uni96_0041_mRNA_8.1      | -                           |
| GF0033249 | 0                         | 1                       | 0                        | Hypothetical protein (1)                              |                                                                                                                                                                                                                                                                                                                                                                                                              |                                                                                                                                                                                                                                                                                                                  |                              | C_uni96_0041_mRNA_5.1      | -                           |
| GF0033248 | 0                         | 1                       | 0                        | Hypothetical protein (1)                              |                                                                                                                                                                                                                                                                                                                                                                                                              |                                                                                                                                                                                                                                                                                                                  |                              | C_uni96_0040_mRNA_9.1      | -                           |
| GF0033247 | 0                         | 1                       | 0                        | Hypothetical protein (1)                              | aspartic-type endopeptidase activity [GO:0004190 molecular_function] (1); proteolysis [GO:0006508 biological_process] (1)                                                                                                                                                                                                                                                                                    | Aspartic peptidase, active site [IPR001969] (4)                                                                                                                                                                                                                                                                  |                              | C_uni96_0040_mRNA_6.1      | -                           |
| GF0033246 | 0                         | 1                       | 0                        | Hypothetical protein (1)                              |                                                                                                                                                                                                                                                                                                                                                                                                              | Reverse transcriptase domain [IPR004077] (4)                                                                                                                                                                                                                                                                     |                              | C_uni96_0040_mRNA_4.1      | -                           |
| GF0033245 | 0                         | 1                       | 0                        | Hypothetical protein (1)                              |                                                                                                                                                                                                                                                                                                                                                                                                              |                                                                                                                                                                                                                                                                                                                  |                              | C_uni96_0040_mRNA_2.1      | -                           |
| GF0033244 | 0                         | 1                       | 0                        | Hypothetical protein (1)                              |                                                                                                                                                                                                                                                                                                                                                                                                              | LOG family [IPR031100] (1)                                                                                                                                                                                                                                                                                       |                              | C_uni96_0040_mRNA_14.1     | -                           |
| GF0033243 | 0                         | 1                       | 0                        | Hypothetical protein (1)                              |                                                                                                                                                                                                                                                                                                                                                                                                              |                                                                                                                                                                                                                                                                                                                  |                              | C_uni96_0039_mRNA_18.1     | -                           |
| GF0033242 | 0                         | 1                       | 0                        | Hypothetical protein (1)                              |                                                                                                                                                                                                                                                                                                                                                                                                              |                                                                                                                                                                                                                                                                                                                  |                              | C_uni96_0039_mRNA_17.1     | -                           |
| GF0033241 | 0                         | 1                       | 0                        | Seven transmembrane MLO family protein (1)            | defense response [GO:0006952 biological_process] (1); integral component of membrane [GO:0016021 cellular_component] (1)                                                                                                                                                                                                                                                                                     | Mlo-related protein [IPR004326] (1)                                                                                                                                                                                                                                                                              |                              | C_uni96_0039_mRNA_1.1      | -                           |
| GF0033240 | 0                         | 1                       | 0                        | Hypothetical protein (1)                              |                                                                                                                                                                                                                                                                                                                                                                                                              |                                                                                                                                                                                                                                                                                                                  |                              | C_uni96_0037_mRNA_8.1      | -                           |
| GF0033239 | 0                         | 1                       | 0                        | Hypothetical protein (1)                              |                                                                                                                                                                                                                                                                                                                                                                                                              |                                                                                                                                                                                                                                                                                                                  |                              | C_uni96_0037_mRNA_6.1      | -                           |
| GF0033238 | 0                         | 1                       | 0                        | Hypothetical protein (1)                              |                                                                                                                                                                                                                                                                                                                                                                                                              |                                                                                                                                                                                                                                                                                                                  |                              | C_uni96_0037_mRNA_15.1     | -                           |
| GF0033237 | 0                         | 1                       | 0                        | Hypothetical protein (1)                              |                                                                                                                                                                                                                                                                                                                                                                                                              |                                                                                                                                                                                                                                                                                                                  |                              | C_uni96_0037_mRNA_11.1     | -                           |
| GF0033236 | 0                         | 1                       | 0                        | Hypothetical protein (1)                              |                                                                                                                                                                                                                                                                                                                                                                                                              |                                                                                                                                                                                                                                                                                                                  |                              | C_uni96_0036_mRNA_8.1      | -                           |
| GF0033235 | 0                         | 1                       | 0                        | Hypothetical protein (1)                              |                                                                                                                                                                                                                                                                                                                                                                                                              | Arabidopsis retrotransposon Ori [IPR004312] (1)                                                                                                                                                                                                                                                                  |                              | C_uni96_0036_mRNA_7.1      | -                           |
| GF0033234 | 0                         | 1                       | 0                        | Hypothetical protein (1)                              |                                                                                                                                                                                                                                                                                                                                                                                                              |                                                                                                                                                                                                                                                                                                                  |                              | C_uni96_0036_mRNA_5.1      | -                           |
| GF0033233 | 0                         | 1                       | 0                        | Hypothetical protein (1)                              | metal ion binding [GO:0003672 molecular_function] (1); regulation of transcription, DNA-templated [GO:0006355 biological_process] (1); DNA binding [GO:0003677 molecular_function] (1)                                                                                                                                                                                                                       | Peptidase M16 domain [IPR011237] (1)                                                                                                                                                                                                                                                                             |                              | C_uni96_0036_mRNA_4.1      | -                           |
| GF0033232 | 0                         | 1                       | 0                        | NAC domain protein NAC74 (1)                          |                                                                                                                                                                                                                                                                                                                                                                                                              | NAC domain [IPR003441] (1)                                                                                                                                                                                                                                                                                       |                              | C_uni96_0036_mRNA_3.1      | -                           |
| GF0033231 | 0                         | 1                       | 0                        | Hypothetical protein (1)                              |                                                                                                                                                                                                                                                                                                                                                                                                              |                                                                                                                                                                                                                                                                                                                  |                              | C_uni96_0036_mRNA_2.1      | -                           |
| GF0033230 | 0                         | 1                       | 0                        | Hypothetical protein (1)                              |                                                                                                                                                                                                                                                                                                                                                                                                              |                                                                                                                                                                                                                                                                                                                  |                              | C_uni96_0036_mRNA_17.1     | -                           |
| GF0033229 | 0                         | 1                       | 0                        | Hypothetical protein (1)                              |                                                                                                                                                                                                                                                                                                                                                                                                              |                                                                                                                                                                                                                                                                                                                  |                              | C_uni96_0036_mRNA_15.1     | -                           |
| GF0033228 | 0                         | 1                       | 0                        | Hypothetical protein (1)                              |                                                                                                                                                                                                                                                                                                                                                                                                              |                                                                                                                                                                                                                                                                                                                  |                              | C_uni96_0036_mRNA_12.1     | -                           |
| GF0033227 | 0                         | 1                       | 0                        | Hypothetical protein (1)                              |                                                                                                                                                                                                                                                                                                                                                                                                              |                                                                                                                                                                                                                                                                                                                  |                              | C_uni96_0035_mRNA_9.1      | -                           |
| GF0033226 | 0                         | 1                       | 0                        | Hypothetical protein (1)                              |                                                                                                                                                                                                                                                                                                                                                                                                              |                                                                                                                                                                                                                                                                                                                  |                              | C_uni96_0035_mRNA_7.1      | -                           |
| GF0033225 | 0                         | 1                       | 0                        | Hypothetical protein (1)                              |                                                                                                                                                                                                                                                                                                                                                                                                              |                                                                                                                                                                                                                                                                                                                  |                              | C_uni96_0035_mRNA_6.1      | -                           |
| GF0033224 | 0                         | 1                       | 0                        | Hypothetical protein (1)                              |                                                                                                                                                                                                                                                                                                                                                                                                              |                                                                                                                                                                                                                                                                                                                  |                              | C_uni96_0035_mRNA_5.1      | -                           |
| GF0033223 | 0                         | 1                       | 0                        | Hypothetical protein (1)                              |                                                                                                                                                                                                                                                                                                                                                                                                              |                                                                                                                                                                                                                                                                                                                  |                              | C_uni96_0035_mRNA_18.1     | -                           |
| GF0033222 | 0                         | 1                       | 0                        | Hypothetical protein (1)                              |                                                                                                                                                                                                                                                                                                                                                                                                              |                                                                                                                                                                                                                                                                                                                  |                              | C_uni96_0035_mRNA_17.1     | -                           |



| ID       | Num. in <i>C. crotolariae</i> | Num. in <i>C. caudata</i> | Num. in <i>P. trifidata</i> | Note                                                 | GO                                                                                                                                                                                                                                                                                                                                             | InterPro                                                                                                                                                                                                                                                                                                               | Members in <i>Crotolariae</i> | Members in <i>Caudata</i> | Members in <i>Trifidata</i> |
|----------|-------------------------------|---------------------------|-----------------------------|------------------------------------------------------|------------------------------------------------------------------------------------------------------------------------------------------------------------------------------------------------------------------------------------------------------------------------------------------------------------------------------------------------|------------------------------------------------------------------------------------------------------------------------------------------------------------------------------------------------------------------------------------------------------------------------------------------------------------------------|-------------------------------|---------------------------|-----------------------------|
| GF003221 | 0                             | 1                         | 0                           | Hypothetical protein (1)                             | heme binding [GO:002037 molecular_function] (1); iron ion binding [GO:005506 molecular_function] (1); oxidoreductase activity, acting on paired donors, with incorporation or reduction of molecular oxygen [GO:0016705 molecular_function] (1); oxidation-reduction process [GO:005514 biological_process] (1)                                | Cytochrome P450 [IPRO1128] (1)                                                                                                                                                                                                                                                                                         | -                             | C_umhii_0634_mRNA_3.1     | -                           |
| GF003220 | 0                             | 1                         | 0                           | Hypothetical protein (1)                             | heme binding [GO:002037 molecular_function] (1); iron ion binding [GO:005506 molecular_function] (1); oxidation-reduction process [GO:005514 biological_process] (1); oxidoreductase activity, acting on paired donors, with incorporation or reduction of molecular oxygen [GO:0016705 molecular_function] (1)                                | Cytochrome P450 [IPRO1128] (1); Cytochrome P450, conserved site [IPRO1792] (1)                                                                                                                                                                                                                                         | -                             | C_umhii_0634_mRNA_2.1     | -                           |
| GF003219 | 0                             | 1                         | 0                           | Hypothetical protein (1)                             | -                                                                                                                                                                                                                                                                                                                                              | -                                                                                                                                                                                                                                                                                                                      | -                             | C_umhii_0634_mRNA_15.1    | -                           |
| GF003218 | 0                             | 1                         | 0                           | Hypothetical protein (1)                             | O-methyltransferase activity [GO:0008171 molecular_function] (1)                                                                                                                                                                                                                                                                               | S-adenosyl-4-methionine-dependent methyltransferase [IPRO29063] (1); O-methyltransferase, family 3 [IPRO2935] (1)                                                                                                                                                                                                      | -                             | C_umhii_0634_mRNA_14.1    | -                           |
| GF003217 | 0                             | 1                         | 0                           | Hypothetical protein (1)                             | nucleic acid binding [GO:0003676 molecular_function] (1)                                                                                                                                                                                                                                                                                       | Ribonuclease H-like domain [IPRO12337] (1)                                                                                                                                                                                                                                                                             | -                             | C_umhii_0634_mRNA_12.1    | -                           |
| GF003216 | 0                             | 1                         | 0                           | LRR receptor-like kinase (1)                         | -                                                                                                                                                                                                                                                                                                                                              | Protein kinase-like domain [IPRO11009] (1); Leucine-rich repeat domain, L domain-like [IPRO2575] (1); Leucine-rich repeat-containing N-terminal, plant-type [IPRO13210] (1)                                                                                                                                            | -                             | C_umhii_0634_mRNA_10.1    | -                           |
| GF003215 | 0                             | 1                         | 0                           | Reticuline oxidase-like protein (1)                  | flavin adenine dinucleotide binding [GO:0050660 molecular_function] (1); oxidoreductase activity [GO:0016991 molecular_function] (1); oxidation-reduction process [GO:005514 biological_process] (1)                                                                                                                                           | Berberine/berberine-like [IPRO12951] (1)                                                                                                                                                                                                                                                                               | -                             | C_umhii_0634_mRNA_1.1     | -                           |
| GF003214 | 0                             | 1                         | 0                           | Hypothetical protein (1)                             | RNA processing [GO:0006396 biological_process] (1); protein binding [GO:005515 molecular_function] (1)                                                                                                                                                                                                                                         | Tetrapeptide-like helical domain [IPRO11990] (1); HAT (Half-A-TPR) repeat [IPRO10707] (1)                                                                                                                                                                                                                              | -                             | C_umhii_0633_mRNA_7.1     | -                           |
| GF003213 | 0                             | 1                         | 0                           | LRR and NB-ARC domain disease resistance protein (1) | ADP binding [GO:0043531 molecular_function] (1)                                                                                                                                                                                                                                                                                                | Leucine-rich repeat domain, L domain-like [IPRO2575] (1); NB-ARC [IPRO2182] (1); P-loop containing nucleoside triphosphate hydrolase [IPRO27417] (1)                                                                                                                                                                   | -                             | C_umhii_0633_mRNA_6.1     | -                           |
| GF003212 | 0                             | 1                         | 0                           | Hypothetical protein (1)                             | -                                                                                                                                                                                                                                                                                                                                              | Alpha-crystallin-like20 domain [IPRO2068] (1); HSP20-like chaperone [IPRO6979] (1); Small heat shock protein HSP20 [IPRO11107] (1)                                                                                                                                                                                     | -                             | C_umhii_0633_mRNA_5.1     | -                           |
| GF003211 | 0                             | 1                         | 0                           | DNA (Cytosine-5-methyltransferase) (1)               | chromatin binding [GO:0003682 molecular_function] (1); methyltransferase activity [GO:0008168 molecular_function] (1)                                                                                                                                                                                                                          | S-adenosyl-4-methionine-dependent methyltransferase [IPRO29063] (1); Chromatin-remodeling domain [IPRO0953] (1); C-5 cytosine methyltransferase [IPRO11525] (1); Bromo adjacent homology (BAH) domain [IPRO1025] (1); Chromo domain-like [IPRO1819] (1); Chromo domain [IPRO23780] (1)                                 | -                             | C_umhii_0633_mRNA_3.1     | -                           |
| GF003210 | 0                             | 1                         | 0                           | LRR and NB-ARC domain disease resistance protein (1) | ADP binding [GO:0043531 molecular_function] (1)                                                                                                                                                                                                                                                                                                | Leucine-rich repeat domain, L domain-like [IPRO2575] (1); P-loop containing nucleoside triphosphate hydrolase [IPRO27417] (1); NB-ARC [IPRO2182] (1)                                                                                                                                                                   | -                             | C_umhii_0633_mRNA_12.1    | -                           |
| GF003209 | 0                             | 1                         | 0                           | Hypothetical protein (1)                             | -                                                                                                                                                                                                                                                                                                                                              | -                                                                                                                                                                                                                                                                                                                      | -                             | C_umhii_0633_mRNA_1.1     | -                           |
| GF003208 | 0                             | 1                         | 0                           | Hypothetical protein (1)                             | -                                                                                                                                                                                                                                                                                                                                              | -                                                                                                                                                                                                                                                                                                                      | -                             | C_umhii_0632_mRNA_6.1     | -                           |
| GF003207 | 0                             | 1                         | 0                           | Hypothetical protein (1)                             | -                                                                                                                                                                                                                                                                                                                                              | -                                                                                                                                                                                                                                                                                                                      | -                             | C_umhii_0632_mRNA_3.1     | -                           |
| GF003206 | 0                             | 1                         | 0                           | Hypothetical protein (1)                             | ADP binding [GO:0043531 molecular_function] (1)                                                                                                                                                                                                                                                                                                | Leucine-rich repeat domain, L domain-like [IPRO2575] (1); NB-ARC [IPRO2182] (1); P-loop containing nucleoside triphosphate hydrolase [IPRO27417] (1)                                                                                                                                                                   | -                             | C_umhii_0632_mRNA_25.1    | -                           |
| GF003205 | 0                             | 1                         | 0                           | Hypothetical protein (1)                             | -                                                                                                                                                                                                                                                                                                                                              | -                                                                                                                                                                                                                                                                                                                      | -                             | C_umhii_0632_mRNA_21.1    | -                           |
| GF003204 | 0                             | 1                         | 0                           | Hypothetical protein (1)                             | -                                                                                                                                                                                                                                                                                                                                              | -                                                                                                                                                                                                                                                                                                                      | -                             | C_umhii_0632_mRNA_20.1    | -                           |
| GF003203 | 0                             | 1                         | 0                           | Hypothetical protein (1)                             | -                                                                                                                                                                                                                                                                                                                                              | -                                                                                                                                                                                                                                                                                                                      | -                             | C_umhii_0632_mRNA_19.1    | -                           |
| GF003202 | 0                             | 1                         | 0                           | Hypothetical protein (1)                             | -                                                                                                                                                                                                                                                                                                                                              | -                                                                                                                                                                                                                                                                                                                      | -                             | C_umhii_0632_mRNA_18.1    | -                           |
| GF003201 | 0                             | 1                         | 0                           | Hypothetical protein (1)                             | -                                                                                                                                                                                                                                                                                                                                              | -                                                                                                                                                                                                                                                                                                                      | -                             | C_umhii_0632_mRNA_17.1    | -                           |
| GF003200 | 0                             | 1                         | 0                           | Hypothetical protein (1)                             | -                                                                                                                                                                                                                                                                                                                                              | -                                                                                                                                                                                                                                                                                                                      | -                             | C_umhii_0632_mRNA_16.1    | -                           |
| GF003199 | 0                             | 1                         | 0                           | Hypothetical protein (1)                             | -                                                                                                                                                                                                                                                                                                                                              | -                                                                                                                                                                                                                                                                                                                      | -                             | C_umhii_0632_mRNA_15.1    | -                           |
| GF003198 | 0                             | 1                         | 0                           | Hypothetical protein (1)                             | -                                                                                                                                                                                                                                                                                                                                              | -                                                                                                                                                                                                                                                                                                                      | -                             | C_umhii_0632_mRNA_14.1    | -                           |
| GF003197 | 0                             | 1                         | 0                           | Hypothetical protein (1)                             | -                                                                                                                                                                                                                                                                                                                                              | -                                                                                                                                                                                                                                                                                                                      | -                             | C_umhii_0632_mRNA_13.1    | -                           |
| GF003196 | 0                             | 1                         | 0                           | Hypothetical protein (1)                             | -                                                                                                                                                                                                                                                                                                                                              | -                                                                                                                                                                                                                                                                                                                      | -                             | C_umhii_0632_mRNA_12.1    | -                           |
| GF003195 | 0                             | 1                         | 0                           | Hypothetical protein (1)                             | -                                                                                                                                                                                                                                                                                                                                              | -                                                                                                                                                                                                                                                                                                                      | -                             | C_umhii_0632_mRNA_11.1    | -                           |
| GF003194 | 0                             | 1                         | 0                           | Putative RNA-directed DNA polymerase (1)             | -                                                                                                                                                                                                                                                                                                                                              | Reverse transcriptase zinc-binding domain [IPRO26069] (1); Reverse transcriptase domain [IPRO0967] (1)                                                                                                                                                                                                                 | -                             | C_umhii_0631_mRNA_5.1     | -                           |
| GF003193 | 0                             | 1                         | 0                           | Hypothetical protein (1)                             | -                                                                                                                                                                                                                                                                                                                                              | Domain of unknown function DUF4283 [IPRO25558] (1); Endonuclease/exonuclease/phosphatase [IPRO135] (1)                                                                                                                                                                                                                 | -                             | C_umhii_0631_mRNA_4.1     | -                           |
| GF003192 | 0                             | 1                         | 0                           | TMV resistance protein N (1)                         | signal transduction [GO:0007165 biological_process] (1); protein binding [GO:005515 molecular_function] (1)                                                                                                                                                                                                                                    | Toll/interleukin receptor homology (THR) domain [IPRO1057] (1); Winged helix-turn-helix DNA-binding domain [IPRO11991] (1)                                                                                                                                                                                             | -                             | C_umhii_0631_mRNA_3.1     | -                           |
| GF003191 | 0                             | 1                         | 0                           | Hypothetical protein (1)                             | -                                                                                                                                                                                                                                                                                                                                              | -                                                                                                                                                                                                                                                                                                                      | -                             | C_umhii_0631_mRNA_11.1    | -                           |
| GF003190 | 0                             | 1                         | 0                           | Hypothetical protein (1)                             | phosphatidylinositol binding [GO:001683] (1); Phospho-associated domain [GO:0033691 molecular_function] (1)                                                                                                                                                                                                                                    | Sorting nexin, C-terminal [IPRO13937] (1); Phos. homophilic domain [IPRO1683] (1); Phos-associated domain [IPRO3114] (1); PX-associated, sorting nexin 13 [IPRO13996] (1)                                                                                                                                              | -                             | C_umhii_0630_mRNA_22.1    | -                           |
| GF003189 | 0                             | 1                         | 0                           | Hypothetical protein (1)                             | -                                                                                                                                                                                                                                                                                                                                              | -                                                                                                                                                                                                                                                                                                                      | -                             | C_umhii_0630_mRNA_21.1    | -                           |
| GF003188 | 0                             | 1                         | 0                           | Hypothetical protein (1)                             | -                                                                                                                                                                                                                                                                                                                                              | -                                                                                                                                                                                                                                                                                                                      | -                             | C_umhii_0630_mRNA_19.1    | -                           |
| GF003187 | 0                             | 1                         | 0                           | Hypothetical protein (1)                             | structural constituent of cell wall [GO:0005199 molecular_function] (1)                                                                                                                                                                                                                                                                        | Leucine-rich repeat domain, L domain-like [IPRO2575] (1); Leucine-rich repeat-containing N-terminal, plant-type [IPRO13210] (1); Plant-specific extensin-like protein [IPRO3852] (1)                                                                                                                                   | -                             | C_umhii_0630_mRNA_17.1    | -                           |
| GF003186 | 0                             | 1                         | 0                           | RING-FYVE/PHD zinc finger protein (1)                | zinc ion binding [GO:0008270 molecular_function] (1); protein binding [GO:005515 molecular_function] (1)                                                                                                                                                                                                                                       | Zinc finger, PHD-type, conserved site [IPRO19786] (1); Zinc finger, RING-FYVE/PHD-type [IPRO13083] (1); Zinc finger, PHD-type [IPRO19665] (1); Arg/Asn/Asp/Asn acyltransferase [IPRO16181] (1); Zinc finger, PHD-finger [IPRO19797] (1); Zinc finger, FYVE/PHD-type [IPRO11011] (1)                                    | -                             | C_umhii_0628_mRNA_22.1    | -                           |
| GF003185 | 0                             | 1                         | 0                           | Hypothetical protein (1)                             | -                                                                                                                                                                                                                                                                                                                                              | -                                                                                                                                                                                                                                                                                                                      | -                             | C_umhii_0628_mRNA_21.1    | -                           |
| GF003184 | 0                             | 1                         | 0                           | Hypothetical protein (1)                             | -                                                                                                                                                                                                                                                                                                                                              | -                                                                                                                                                                                                                                                                                                                      | -                             | C_umhii_0628_mRNA_19.1    | -                           |
| GF003183 | 0                             | 1                         | 0                           | Hypothetical protein (1)                             | -                                                                                                                                                                                                                                                                                                                                              | -                                                                                                                                                                                                                                                                                                                      | -                             | C_umhii_0628_mRNA_18.1    | -                           |
| GF003182 | 0                             | 1                         | 0                           | Hypothetical protein (1)                             | -                                                                                                                                                                                                                                                                                                                                              | -                                                                                                                                                                                                                                                                                                                      | -                             | C_umhii_0628_mRNA_17.1    | -                           |
| GF003181 | 0                             | 1                         | 0                           | Phospholipase A1 (1)                                 | lipid metabolic process [GO:0006629 biological_process] (1)                                                                                                                                                                                                                                                                                    | Fungal lipase-like domain [IPRO2921] (1); Alpha-Beta hydrolase fold [IPRO2908] (1)                                                                                                                                                                                                                                     | -                             | C_umhii_0628_mRNA_16.1    | -                           |
| GF003180 | 0                             | 1                         | 0                           | Ras-like GTP-binding protein YPT1 (1)                | membrane [GO:0016020 cellular_component] (1); small GTPase mediated signal transduction [GO:0007264 biological_process] (1); intracellular [GO:0006622 cellular_component] (1); GTP binding [GO:000525 molecular_function] (1); signal transduction [GO:0007165 biological_process] (1); protein transport [GO:0015031 biological_process] (1) | Small GTPase superfamily, Rab type [IPRO3379] (1); Small GTP-binding protein domain [IPRO2522] (1); Small GTPase superfamily, Rho type [IPRO3379] (1); Small GTPase superfamily [IPRO1806] (1); P-loop containing nucleoside triphosphate hydrolase [IPRO27417] (1); Small GTPase superfamily, Ras type [IPRO2089] (1) | -                             | C_umhii_0626_mRNA_14.1    | -                           |
| GF003179 | 0                             | 1                         | 0                           | Expansin-like BI (1)                                 | -                                                                                                                                                                                                                                                                                                                                              | RipA-like double-pi beta-barrel domain [IPRO0909] (1); Expansin, celhulose-binding-like domain [IPRO7117] (1)                                                                                                                                                                                                          | -                             | C_umhii_0626_mRNA_1.1     | -                           |
| GF003178 | 0                             | 1                         | 0                           | Hypothetical protein (1)                             | -                                                                                                                                                                                                                                                                                                                                              | -                                                                                                                                                                                                                                                                                                                      | -                             | C_umhii_0627_mRNA_21.1    | -                           |
| GF003177 | 0                             | 1                         | 0                           | Hypothetical protein (1)                             | -                                                                                                                                                                                                                                                                                                                                              | -                                                                                                                                                                                                                                                                                                                      | -                             | C_umhii_0627_mRNA_18.1    | -                           |
| GF003176 | 0                             | 1                         | 0                           | Hypothetical protein (1)                             | -                                                                                                                                                                                                                                                                                                                                              | -                                                                                                                                                                                                                                                                                                                      | -                             | C_umhii_0627_mRNA_17.1    | -                           |
| GF003175 | 0                             | 1                         | 0                           | Hypothetical protein (1)                             | -                                                                                                                                                                                                                                                                                                                                              | -                                                                                                                                                                                                                                                                                                                      | -                             | C_umhii_0627_mRNA_11.1    | -                           |
| GF003174 | 0                             | 1                         | 0                           | Hypothetical protein (1)                             | -                                                                                                                                                                                                                                                                                                                                              | -                                                                                                                                                                                                                                                                                                                      | -                             | C_umhii_0626_mRNA_8.1     | -                           |
| GF003173 | 0                             | 1                         | 0                           | Hypothetical protein (1)                             | -                                                                                                                                                                                                                                                                                                                                              | -                                                                                                                                                                                                                                                                                                                      | -                             | C_umhii_0626_mRNA_6.1     | -                           |
| GF003172 | 0                             | 1                         | 0                           | Hypothetical protein (1)                             | -                                                                                                                                                                                                                                                                                                                                              | -                                                                                                                                                                                                                                                                                                                      | -                             | C_umhii_0626_mRNA_5.1     | -                           |
| GF003171 | 0                             | 1                         | 0                           | Hypothetical protein (1)                             | -                                                                                                                                                                                                                                                                                                                                              | -                                                                                                                                                                                                                                                                                                                      | -                             | C_umhii_0626_mRNA_3.1     | -                           |
| GF003170 | 0                             | 1                         | 0                           | Hypothetical protein (1)                             | magnesium ion binding [GO:000287 molecular_function] (1); terpene synthase activity [GO:0010333 molecular_function] (1); lyase activity [GO:0016829 molecular_function] (1)                                                                                                                                                                    | Isoprenoid synthase domain [IPRO08949] (1); Terpene synthase, metal-binding domain [IPRO06630] (1)                                                                                                                                                                                                                     | -                             | C_umhii_0626_mRNA_16.1    | -                           |
| GF003169 | 0                             | 1                         | 0                           | (+)-delta-cadinene synthase isozyme A (1)            | metabolic process [GO:0008182 biological_process] (1); terpene synthase activity [GO:0010333 molecular_function] (1); lyase activity [GO:0016829 molecular_function] (1)                                                                                                                                                                       | Terpene synthase, N-terminal domain [IPRO19019] (1); Terpene synthase, metal-binding domain [IPRO06630] (1); Terpenoid cyclase/protein geranyltransferase-alpha domain [IPRO08930] (1); Isoprenoid synthase domain [IPRO08949] (1)                                                                                     | -                             | C_umhii_0626_mRNA_14.1    | -                           |
| GF003168 | 0                             | 1                         | 0                           | Hypothetical protein (1)                             | -                                                                                                                                                                                                                                                                                                                                              | -                                                                                                                                                                                                                                                                                                                      | -                             | C_umhii_0626_mRNA_12.1    | -                           |
| GF003167 | 0                             | 1                         | 0                           | Hypothetical protein (1)                             | magnesium ion binding [GO:000287 molecular_function] (1); lyase activity [GO:0016829 molecular_function] (1); terpene synthase activity [GO:0010333 molecular_function] (1)                                                                                                                                                                    | Terpene synthase, metal-binding domain [IPRO08930] (1); Terpenoid synthase domain [IPRO08949] (1)                                                                                                                                                                                                                      | -                             | C_umhii_0626_mRNA_10.1    | -                           |
| GF003166 | 0                             | 1                         | 0                           | Hypothetical protein (1)                             | -                                                                                                                                                                                                                                                                                                                                              | -                                                                                                                                                                                                                                                                                                                      | -                             | C_umhii_0625_mRNA_5.1     | -                           |

| ID        | Num. in <i>C. crotolariae</i> | Num. in <i>C. canalis</i> | Num. in <i>P. trifidatus</i> | Name                                                                       | GO                                                                                                                                                                                                                                                                                                                                                                                                                                                                                                                    | InterPro                                                                                                                                                                                                                                                                                                                                                                                                                                | Members in <i>Crotolariae</i> | Members in <i>Canalis</i> | Members in <i>Trifidatus</i> |
|-----------|-------------------------------|---------------------------|------------------------------|----------------------------------------------------------------------------|-----------------------------------------------------------------------------------------------------------------------------------------------------------------------------------------------------------------------------------------------------------------------------------------------------------------------------------------------------------------------------------------------------------------------------------------------------------------------------------------------------------------------|-----------------------------------------------------------------------------------------------------------------------------------------------------------------------------------------------------------------------------------------------------------------------------------------------------------------------------------------------------------------------------------------------------------------------------------------|-------------------------------|---------------------------|------------------------------|
| GF0038165 | 0                             | 1                         | 1                            | 0 Pre-mRNA-processing factor 17 (1)                                        | protein binding [GO:0005515 molecular_function] (1); catalytic step 2 spliceosome [GO:0071013] cellular_component (1); mRNA splicing via spliceosome [GO:000398 biological_process] (1)                                                                                                                                                                                                                                                                                                                               | WD40/YVTN repeat-like-containing domain [IPR015841] (1); WD40 repeat-conserved site [IPR019775] (1); WD40-repeat-containing domain [IPR017986] (1); WD40 repeat [IPR016001] (1); Pre-mRNA processing factor 17 [IPR028247] (1); Crotolaria WD-40 repeat [IPR028472] (1)                                                                                                                                                                 | -                             | C_unihit_00625_mRNA_4.1   | -                            |
| GF0038164 | 0                             | 1                         | 1                            | 0 Hypothetical protein (1)                                                 | zinc ion binding [GO:0008270 molecular_function] (1); nucleic acid binding [GO:0003676 molecular_function] (1)                                                                                                                                                                                                                                                                                                                                                                                                        | Zinc finger, CCHC-type [IPR001878] (1)                                                                                                                                                                                                                                                                                                                                                                                                  | -                             | C_unihit_00625_mRNA_18.1  | -                            |
| GF0038163 | 0                             | 1                         | 1                            | 0 Hypothetical protein (1)                                                 | metal ion binding [GO:0046872 molecular_function] (1)                                                                                                                                                                                                                                                                                                                                                                                                                                                                 | Zinc finger, CCHC-type [IPR000571] (1)                                                                                                                                                                                                                                                                                                                                                                                                  | -                             | C_unihit_00624_mRNA_9.1   | -                            |
| GF0038162 | 0                             | 1                         | 1                            | 0 Hypothetical protein (1)                                                 | -                                                                                                                                                                                                                                                                                                                                                                                                                                                                                                                     | -                                                                                                                                                                                                                                                                                                                                                                                                                                       | -                             | C_unihit_00624_mRNA_7.1   | -                            |
| GF0038161 | 0                             | 1                         | 1                            | 0 Hypothetical protein (1)                                                 | -                                                                                                                                                                                                                                                                                                                                                                                                                                                                                                                     | -                                                                                                                                                                                                                                                                                                                                                                                                                                       | -                             | C_unihit_00624_mRNA_4.1   | -                            |
| GF0038160 | 0                             | 1                         | 1                            | 0 BED zinc finger_hA1 family dimerization domain (1)                       | nucleic acid binding [GO:0003676 molecular_function] (1); DNA binding [GO:0003677 molecular_function] (1)                                                                                                                                                                                                                                                                                                                                                                                                             | Zinc finger, BED-type [IPR003656] (1); Rbomkase H-like domain [IPR012337] (1)                                                                                                                                                                                                                                                                                                                                                           | -                             | C_unihit_00624_mRNA_3.1   | -                            |
| GF0038159 | 0                             | 1                         | 1                            | 0 Hypothetical protein (1)                                                 | membrane [GO:0004920 cellular_component] (1)                                                                                                                                                                                                                                                                                                                                                                                                                                                                          | ABC-2 type transporter [IPR015252] (1)                                                                                                                                                                                                                                                                                                                                                                                                  | -                             | C_unihit_00624_mRNA_2.1   | -                            |
| GF0038158 | 0                             | 1                         | 1                            | 0 Cytochrome P450 family ferulate hydroxylase (1)                          | iron ion binding [GO:0005506 molecular_function] (1); heme binding [GO:0020037 molecular_function] (1); oxidoreductase activity, acting on paired donors, with incorporation or reduction of molecular oxygen [GO:0016795 molecular_function] (1); oxidation-reduction process [GO:0055114 biological_process] (1)                                                                                                                                                                                                    | Cytochrome P450 [IPR001128] (1)                                                                                                                                                                                                                                                                                                                                                                                                         | -                             | C_unihit_00624_mRNA_15.1  | -                            |
| GF0038157 | 0                             | 1                         | 1                            | 0 Hypothetical protein (1)                                                 | -                                                                                                                                                                                                                                                                                                                                                                                                                                                                                                                     | -                                                                                                                                                                                                                                                                                                                                                                                                                                       | -                             | C_unihit_00624_mRNA_1.1   | -                            |
| GF0038156 | 0                             | 1                         | 1                            | 0 Hypothetical protein (1)                                                 | -                                                                                                                                                                                                                                                                                                                                                                                                                                                                                                                     | -                                                                                                                                                                                                                                                                                                                                                                                                                                       | -                             | C_unihit_00623_mRNA_25.1  | -                            |
| GF0038155 | 0                             | 1                         | 1                            | 0 Hypothetical protein (1)                                                 | -                                                                                                                                                                                                                                                                                                                                                                                                                                                                                                                     | -                                                                                                                                                                                                                                                                                                                                                                                                                                       | -                             | C_unihit_00623_mRNA_24.1  | -                            |
| GF0038154 | 0                             | 1                         | 1                            | 0 Hypothetical protein (1)                                                 | carbohydrate metabolic process [GO:0009755 biological_process] (1); asparagine synthase (glutamine hydrolyzing) activity [GO:0004066 molecular_function] (1); asparagine biosynthetic process [GO:0006529 biological_process] (1)                                                                                                                                                                                                                                                                                     | Glycosyl hydrolase, catalytic domain [IPR017911] (1); Rossmann-like alpha beta alpha sandwich fold [IPR014729] (1); Asparagine synthase [IPR001962] (1)                                                                                                                                                                                                                                                                                 | -                             | C_unihit_00622_mRNA_13.1  | -                            |
| GF0038153 | 0                             | 1                         | 1                            | 0 Hypothetical protein (1)                                                 | -                                                                                                                                                                                                                                                                                                                                                                                                                                                                                                                     | -                                                                                                                                                                                                                                                                                                                                                                                                                                       | -                             | C_unihit_00621_mRNA_6.1   | -                            |
| GF0038152 | 0                             | 1                         | 1                            | 0 Hypothetical protein (1)                                                 | -                                                                                                                                                                                                                                                                                                                                                                                                                                                                                                                     | -                                                                                                                                                                                                                                                                                                                                                                                                                                       | -                             | C_unihit_00620_mRNA_9.1   | -                            |
| GF0038151 | 0                             | 1                         | 1                            | 0 TMV resistance N (1)                                                     | protein binding [GO:0005515 molecular_function] (1)                                                                                                                                                                                                                                                                                                                                                                                                                                                                   | Leucine-rich repeat [IPR001611] (1); Leucine-rich repeat domain, I. domain-like [IPR022675] (1)                                                                                                                                                                                                                                                                                                                                         | -                             | C_unihit_00620_mRNA_5.1   | -                            |
| GF0038150 | 0                             | 1                         | 1                            | 0 Aspartate kinase (1)                                                     | aspartate kinase activity [GO:0004072 molecular_function] (1); cellular amino acid metabolic process [GO:0006620 biological_process] (1); NADP binding [GO:0050661 molecular_function] (1); metabolic process [GO:0008132 biological_process] (1); cellular amino acid biosynthetic process [GO:0008052 biological_process] (1); amino acid binding [GO:0016597 molecular_function] (1); oxidation-reduction process [GO:0055114 biological_process] (1); oxidoreductase activity [GO:0016491 molecular_function] (1) | Homoserine dehydrogenase, catalytic [IPR001342] (1); Aspartate-glutamate/valylate kinase [IPR001048] (1); Aspartate kinase, conserved site [IPR018043] (1); GxYS-like ACT domain [IPR027795] (1); ACT domain [IPR002971] (1); Aspartate/homoserine dehydrogenase, NAD-binding [IPR005106] (1); Aspartate kinase domain [IPR000141] (1); Homoserine dehydrogenase, conserved site [IPR019811] (1); NAD(P)-binding domain [IPR016409] (1) | -                             | C_unihit_00620_mRNA_4.1   | -                            |
| GF0038149 | 0                             | 1                         | 1                            | 0 Hypothetical protein (1)                                                 | -                                                                                                                                                                                                                                                                                                                                                                                                                                                                                                                     | Phosphate-induced protein 1 [IPR006766] (1)                                                                                                                                                                                                                                                                                                                                                                                             | -                             | C_unihit_00619_mRNA_9.1   | -                            |
| GF0038148 | 0                             | 1                         | 1                            | 0 Hypothetical protein (1)                                                 | transferase activity, transferring hexose groups [GO:0016758 molecular_function] (1); metabolic process [GO:0008152 biological_process] (1)                                                                                                                                                                                                                                                                                                                                                                           | UDP-glucuronosyl/UDP-glucosyltransferase [IPR002213] (1)                                                                                                                                                                                                                                                                                                                                                                                | -                             | C_unihit_00619_mRNA_13.1  | -                            |
| GF0038147 | 0                             | 1                         | 1                            | 0 Hypothetical protein (1)                                                 | -                                                                                                                                                                                                                                                                                                                                                                                                                                                                                                                     | -                                                                                                                                                                                                                                                                                                                                                                                                                                       | -                             | C_unihit_00618_mRNA_9.1   | -                            |
| GF0038146 | 0                             | 1                         | 1                            | 0 Hypothetical protein (1)                                                 | -                                                                                                                                                                                                                                                                                                                                                                                                                                                                                                                     | -                                                                                                                                                                                                                                                                                                                                                                                                                                       | -                             | C_unihit_00618_mRNA_7.1   | -                            |
| GF0038145 | 0                             | 1                         | 1                            | 0 Hypothetical protein (1)                                                 | -                                                                                                                                                                                                                                                                                                                                                                                                                                                                                                                     | -                                                                                                                                                                                                                                                                                                                                                                                                                                       | -                             | C_unihit_00618_mRNA_26.1  | -                            |
| GF0038144 | 0                             | 1                         | 1                            | 0 Hypothetical protein (1)                                                 | -                                                                                                                                                                                                                                                                                                                                                                                                                                                                                                                     | Reverse transcriptase zinc-binding domain [IPR020960] (1)                                                                                                                                                                                                                                                                                                                                                                               | -                             | C_unihit_00618_mRNA_17.1  | -                            |
| GF0038143 | 0                             | 1                         | 1                            | 0 Monosaccharide transport protein (1)                                     | -                                                                                                                                                                                                                                                                                                                                                                                                                                                                                                                     | -                                                                                                                                                                                                                                                                                                                                                                                                                                       | -                             | C_unihit_00618_mRNA_13.1  | -                            |
| GF0038142 | 0                             | 1                         | 1                            | 0 Hypothetical protein (1)                                                 | -                                                                                                                                                                                                                                                                                                                                                                                                                                                                                                                     | -                                                                                                                                                                                                                                                                                                                                                                                                                                       | -                             | C_unihit_00618_mRNA_12.1  | -                            |
| GF0038141 | 0                             | 1                         | 1                            | 0 Hypothetical protein (1)                                                 | -                                                                                                                                                                                                                                                                                                                                                                                                                                                                                                                     | -                                                                                                                                                                                                                                                                                                                                                                                                                                       | -                             | C_unihit_00617_mRNA_7.1   | -                            |
| GF0038140 | 0                             | 1                         | 1                            | 0 Hypothetical protein (1)                                                 | -                                                                                                                                                                                                                                                                                                                                                                                                                                                                                                                     | S-adenosyl-L-methionine-dependent methyltransferase [IPR020963] (1)                                                                                                                                                                                                                                                                                                                                                                     | -                             | C_unihit_00617_mRNA_4.1   | -                            |
| GF0038139 | 0                             | 1                         | 1                            | 0 Hypothetical protein (1)                                                 | -                                                                                                                                                                                                                                                                                                                                                                                                                                                                                                                     | -                                                                                                                                                                                                                                                                                                                                                                                                                                       | -                             | C_unihit_00617_mRNA_25.1  | -                            |
| GF0038138 | 0                             | 1                         | 1                            | 0 Hypothetical protein (1)                                                 | -                                                                                                                                                                                                                                                                                                                                                                                                                                                                                                                     | -                                                                                                                                                                                                                                                                                                                                                                                                                                       | -                             | C_unihit_00617_mRNA_24.1  | -                            |
| GF0038137 | 0                             | 1                         | 1                            | 0 Hypothetical protein (1)                                                 | -                                                                                                                                                                                                                                                                                                                                                                                                                                                                                                                     | -                                                                                                                                                                                                                                                                                                                                                                                                                                       | -                             | C_unihit_00617_mRNA_23.1  | -                            |
| GF0038136 | 0                             | 1                         | 1                            | 0 Hypothetical protein (1)                                                 | -                                                                                                                                                                                                                                                                                                                                                                                                                                                                                                                     | -                                                                                                                                                                                                                                                                                                                                                                                                                                       | -                             | C_unihit_00617_mRNA_22.1  | -                            |
| GF0038135 | 0                             | 1                         | 1                            | 0 Hypothetical protein (1)                                                 | -                                                                                                                                                                                                                                                                                                                                                                                                                                                                                                                     | -                                                                                                                                                                                                                                                                                                                                                                                                                                       | -                             | C_unihit_00617_mRNA_21.1  | -                            |
| GF0038134 | 0                             | 1                         | 1                            | 0 Hypothetical protein (1)                                                 | -                                                                                                                                                                                                                                                                                                                                                                                                                                                                                                                     | Plant disease resistance response protein [IPR004265] (1)                                                                                                                                                                                                                                                                                                                                                                               | -                             | C_unihit_00617_mRNA_19.1  | -                            |
| GF0038133 | 0                             | 1                         | 1                            | 0 Hypothetical protein (1)                                                 | -                                                                                                                                                                                                                                                                                                                                                                                                                                                                                                                     | Plant disease resistance response protein [IPR004265] (1)                                                                                                                                                                                                                                                                                                                                                                               | -                             | C_unihit_00617_mRNA_18.1  | -                            |
| GF0038132 | 0                             | 1                         | 1                            | 0 Hypothetical protein (1)                                                 | iron ion binding [GO:0005506 molecular_function] (1); heme binding [GO:0020037 molecular_function] (1); oxidoreductase activity, acting on paired donors, with incorporation or reduction of molecular oxygen [GO:0016795 molecular_function] (1); oxidation-reduction process [GO:0055114 biological_process] (1)                                                                                                                                                                                                    | Cytochrome P450 [IPR001128] (1)                                                                                                                                                                                                                                                                                                                                                                                                         | -                             | C_unihit_00617_mRNA_17.1  | -                            |
| GF0038131 | 0                             | 1                         | 1                            | 0 Hypothetical protein (1)                                                 | -                                                                                                                                                                                                                                                                                                                                                                                                                                                                                                                     | -                                                                                                                                                                                                                                                                                                                                                                                                                                       | -                             | C_unihit_00617_mRNA_13.1  | -                            |
| GF0038130 | 0                             | 1                         | 1                            | 0 TTF-type zinc finger protein with HAT dimerization domain (1)            | -                                                                                                                                                                                                                                                                                                                                                                                                                                                                                                                     | Zinc finger, TTF-type [IPR006580] (1); Domain of unknown function DUF4371 [IPR025398] (1)                                                                                                                                                                                                                                                                                                                                               | -                             | C_unihit_00617_mRNA_12.1  | -                            |
| GF0038129 | 0                             | 1                         | 1                            | 0 Hypothetical protein (1)                                                 | -                                                                                                                                                                                                                                                                                                                                                                                                                                                                                                                     | Domain of unknown function DUF4283 [IPR025558] (1)                                                                                                                                                                                                                                                                                                                                                                                      | -                             | C_unihit_00617_mRNA_10.1  | -                            |
| GF0038128 | 0                             | 1                         | 1                            | 0 NADH dehydrogenase [ubiquinone] 1 alpha subcomplex assembly factor 5 (1) | -                                                                                                                                                                                                                                                                                                                                                                                                                                                                                                                     | S-adenosyl-L-methionine-dependent methyltransferase [IPR020963] (1)                                                                                                                                                                                                                                                                                                                                                                     | -                             | C_unihit_00616_mRNA_1.1   | -                            |
| GF0038127 | 0                             | 1                         | 1                            | 0 Hypothetical protein (1)                                                 | -                                                                                                                                                                                                                                                                                                                                                                                                                                                                                                                     | -                                                                                                                                                                                                                                                                                                                                                                                                                                       | -                             | C_unihit_00616_mRNA_8.1   | -                            |
| GF0038126 | 0                             | 1                         | 1                            | 0 Hypothetical protein (1)                                                 | -                                                                                                                                                                                                                                                                                                                                                                                                                                                                                                                     | -                                                                                                                                                                                                                                                                                                                                                                                                                                       | -                             | C_unihit_00616_mRNA_7.1   | -                            |
| GF0038125 | 0                             | 1                         | 1                            | 0 Disease resistance protein (CC-NBS-LRR class) family protein (1)         | ADP binding [GO:0043531 molecular_function] (1)                                                                                                                                                                                                                                                                                                                                                                                                                                                                       | Leucine-rich repeat domain, I. domain-like [IPR022675] (1); AAA-ATPase domain [IPR003593] (1); NB-ARC [IPR002162] (1); P-loop containing nucleoside triphosphate hydrolase [IPR027417] (1)                                                                                                                                                                                                                                              | -                             | C_unihit_00616_mRNA_6.1   | -                            |
| GF0038124 | 0                             | 1                         | 1                            | 0 Hypothetical protein (1)                                                 | -                                                                                                                                                                                                                                                                                                                                                                                                                                                                                                                     | -                                                                                                                                                                                                                                                                                                                                                                                                                                       | -                             | C_unihit_00616_mRNA_20.1  | -                            |
| GF0038123 | 0                             | 1                         | 1                            | 0 Hypothetical protein (1)                                                 | -                                                                                                                                                                                                                                                                                                                                                                                                                                                                                                                     | -                                                                                                                                                                                                                                                                                                                                                                                                                                       | -                             | C_unihit_00616_mRNA_17.1  | -                            |
| GF0038122 | 0                             | 1                         | 1                            | 0 Hypothetical protein (1)                                                 | -                                                                                                                                                                                                                                                                                                                                                                                                                                                                                                                     | -                                                                                                                                                                                                                                                                                                                                                                                                                                       | -                             | C_unihit_00616_mRNA_11.1  | -                            |
| GF0038121 | 0                             | 1                         | 1                            | 0 Hypothetical protein (1)                                                 | -                                                                                                                                                                                                                                                                                                                                                                                                                                                                                                                     | -                                                                                                                                                                                                                                                                                                                                                                                                                                       | -                             | C_unihit_00616_mRNA_10.1  | -                            |
| GF0038120 | 0                             | 1                         | 1                            | 0 Hypothetical protein (1)                                                 | -                                                                                                                                                                                                                                                                                                                                                                                                                                                                                                                     | -                                                                                                                                                                                                                                                                                                                                                                                                                                       | -                             | C_unihit_00615_mRNA_12.1  | -                            |
| GF0038119 | 0                             | 1                         | 1                            | 0 Hypothetical protein (1)                                                 | -                                                                                                                                                                                                                                                                                                                                                                                                                                                                                                                     | -                                                                                                                                                                                                                                                                                                                                                                                                                                       | -                             | C_unihit_00615_mRNA_10.1  | -                            |
| GF0038118 | 0                             | 1                         | 1                            | 0 Hypothetical protein (1)                                                 | -                                                                                                                                                                                                                                                                                                                                                                                                                                                                                                                     | -                                                                                                                                                                                                                                                                                                                                                                                                                                       | -                             | C_unihit_00615_mRNA_1.1   | -                            |
| GF0038117 | 0                             | 1                         | 1                            | 0 Hypothetical protein (1)                                                 | -                                                                                                                                                                                                                                                                                                                                                                                                                                                                                                                     | -                                                                                                                                                                                                                                                                                                                                                                                                                                       | -                             | C_unihit_00613_mRNA_9.1   | -                            |
| GF0038116 | 0                             | 1                         | 1                            | 0 Hypothetical protein (1)                                                 | -                                                                                                                                                                                                                                                                                                                                                                                                                                                                                                                     | Endonuclease/exonuclease/phosphatase [IPR005135] (1); Reverse transcriptase domain [IPR000477] (1); Domain of unknown function DUF4283 [IPR025558] (1)                                                                                                                                                                                                                                                                                  | -                             | C_unihit_00613_mRNA_14.1  | -                            |
| GF0038115 | 0                             | 1                         | 1                            | 0 Hypothetical protein (1)                                                 | cysteine-type peptidase activity [GO:0008234 molecular_function] (1); proteolysis [GO:0006508 biological_process] (1)                                                                                                                                                                                                                                                                                                                                                                                                 | Ulp1 protease family, C-terminal catalytic domain [IPR003653] (1)                                                                                                                                                                                                                                                                                                                                                                       | -                             | C_unihit_00613_mRNA_12.1  | -                            |
| GF0038114 | 0                             | 1                         | 1                            | 0 Hypothetical protein (1)                                                 | -                                                                                                                                                                                                                                                                                                                                                                                                                                                                                                                     | -                                                                                                                                                                                                                                                                                                                                                                                                                                       | -                             | C_unihit_00612_mRNA_9.1   | -                            |
| GF0038113 | 0                             | 1                         | 1                            | 0 Hypothetical protein (1)                                                 | -                                                                                                                                                                                                                                                                                                                                                                                                                                                                                                                     | -                                                                                                                                                                                                                                                                                                                                                                                                                                       | -                             | C_unihit_00612_mRNA_8.1   | -                            |
| GF0038112 | 0                             | 1                         | 1                            | 0 Hypothetical protein (1)                                                 | -                                                                                                                                                                                                                                                                                                                                                                                                                                                                                                                     | -                                                                                                                                                                                                                                                                                                                                                                                                                                       | -                             | C_unihit_00612_mRNA_7.1   | -                            |
| GF0038111 | 0                             | 1                         | 1                            | 0 Hypothetical protein (1)                                                 | oxidation-reduction process [GO:0055114 biological_process] (1); oxidoreductase activity [GO:0016491 molecular_function] (1)                                                                                                                                                                                                                                                                                                                                                                                          | Oxophthalate/iron-dependent dioxygenase [IPR005123] (1); Ispenillin N synthase-like [IPR027443] (1); Non-hem- dioxygenase N-terminal domain [IPR026992] (1)                                                                                                                                                                                                                                                                             | -                             | C_unihit_00612_mRNA_5.1   | -                            |
| GF0038110 | 0                             | 1                         | 1                            | 0 Retrovirus-related Pol polyprotein from transposon TMT 184 (1)           | -                                                                                                                                                                                                                                                                                                                                                                                                                                                                                                                     | -                                                                                                                                                                                                                                                                                                                                                                                                                                       | -                             | C_unihit_00612_mRNA_24.1  | -                            |
| GF0038109 | 0                             | 1                         | 1                            | 0 Hypothetical protein (1)                                                 | nucleic acid binding [GO:0003676 molecular_function] (1); zinc ion binding [GO:0008270 molecular_function] (1)                                                                                                                                                                                                                                                                                                                                                                                                        | Zinc finger, CCHC-type [IPR001878] (1)                                                                                                                                                                                                                                                                                                                                                                                                  | -                             | C_unihit_00612_mRNA_21.1  | -                            |
| GF0038108 | 0                             | 1                         | 1                            | 0 Hypothetical protein (1)                                                 | -                                                                                                                                                                                                                                                                                                                                                                                                                                                                                                                     | -                                                                                                                                                                                                                                                                                                                                                                                                                                       | -                             | C_unihit_00612_mRNA_20.1  | -                            |
| GF0038107 | 0                             | 1                         | 1                            | 0 Hypothetical protein (1)                                                 | -                                                                                                                                                                                                                                                                                                                                                                                                                                                                                                                     | -                                                                                                                                                                                                                                                                                                                                                                                                                                       | -                             | C_unihit_00612_mRNA_2.1   | -                            |
| GF0038106 | 0                             | 1                         | 1                            | 0 Hypothetical protein (1)                                                 | -                                                                                                                                                                                                                                                                                                                                                                                                                                                                                                                     | Archaeal protein transposon Orf1 [IPR004312] (1)                                                                                                                                                                                                                                                                                                                                                                                        | -                             | C_unihit_00612_mRNA_17.1  | -                            |
| GF0038105 | 0                             | 1                         | 1                            | 0 Hypothetical protein (1)                                                 | -                                                                                                                                                                                                                                                                                                                                                                                                                                                                                                                     | -                                                                                                                                                                                                                                                                                                                                                                                                                                       | -                             | C_unihit_00612_mRNA_16.1  | -                            |
| GF0038104 | 0                             | 1                         | 1                            | 0 Hypothetical protein (1)                                                 | -                                                                                                                                                                                                                                                                                                                                                                                                                                                                                                                     | -                                                                                                                                                                                                                                                                                                                                                                                                                                       | -                             | C_unihit_00612_mRNA_13.1  | -                            |
| GF0038103 | 0                             | 1                         | 1                            | 0 G-type lectin S-receptor-like serine/threonine-protein kinase RLK1 (1)   | recognition of pollen [GO:0048544 biological_process] (1); protein phosphorylation [GO:0006608 biological_process] (1); protein kinase activity [GO:0004672 molecular_function] (1); ATP binding [GO:0005524 molecular_function] (1)                                                                                                                                                                                                                                                                                  | Protein kinase domain [IPR000719] (1); Concavalin A-like lectin/glycanase domain [IPR013200] (1); Protein kinase-like domain [IPR011009] (1); S-leucine glycoprotein domain [IPR000858] (1); Protein kinase, ATP binding site [IPR017441] (1); PAN-Ap/leucine domain [IPR03609] (1); Bulb-type lectin domain [IPR01480] (1)                                                                                                             | -                             | C_unihit_00611_mRNA_19.1  | -                            |
| GF0038102 | 0                             | 1                         | 1                            | 0 Hypothetical protein (1)                                                 | protein phosphorylation [GO:0006668 biological_process] (1); protein kinase activity [GO:0004672 molecular_function] (1); ATP binding [GO:0005524 molecular_function] (1)                                                                                                                                                                                                                                                                                                                                             | Protein kinase-like domain [IPR011009] (1); Protein kinase domain [IPR000719] (1); Serine/threonine-protein kinase, active site [IPR008271] (1); Serine/threonine dual specificity protein kinase, catalytic domain [IPR002290] (1)                                                                                                                                                                                                     | -                             | C_unihit_00611_mRNA_17.1  | -                            |
| GF0038101 | 0                             | 1                         | 1                            | 0 Hypothetical protein (1)                                                 | -                                                                                                                                                                                                                                                                                                                                                                                                                                                                                                                     | Bulb-type lectin domain [IPR01480] (1)                                                                                                                                                                                                                                                                                                                                                                                                  | -                             | C_unihit_00611_mRNA_15.1  | -                            |

| ID       | Num. in C. crottensteini | Num. in C. caudata | Num. in P. putidans | Note                                                                   | GO                                                                                                                                                                                                                                                                | InterPro                                                                                                                                                                                                                                                                                                                               | Members in C. crottensteini | Members in C. caudata   | Members in P. putidans |
|----------|--------------------------|--------------------|---------------------|------------------------------------------------------------------------|-------------------------------------------------------------------------------------------------------------------------------------------------------------------------------------------------------------------------------------------------------------------|----------------------------------------------------------------------------------------------------------------------------------------------------------------------------------------------------------------------------------------------------------------------------------------------------------------------------------------|-----------------------------|-------------------------|------------------------|
| GF003100 | 0                        | 1                  | 0                   | G-type lectin S-receptor-like serine/threonine-protein kinase RLK1 (1) | ATP binding [GO:000524 molecular_function] (1); protein phosphorylation [GO:0006468 biological_process] (1); protein kinase activity [GO:0004672 molecular_function] (1)                                                                                          | Serine/threonine-protein kinase, active site [IPRO0271] (1); Protein kinase, ATP binding site [IPRO1744] (1); Serine/threonine-specific protein kinase, catalytic domain [IPRO02290] (1); Protein kinase domain [IPRO00719] (1); Protein kinase-like domain [IPRO11009] (1); Concavalin A-like lectin/glucanase domain [IPRO15320] (1) | C_ushii_00611_mRNA_14.1     | -                       | -                      |
| GF003899 | 0                        | 1                  | 0                   | Hypothetical protein (1)                                               | recognition of pollen [GO:0048544 biological_process] (1)                                                                                                                                                                                                         | S-lucifer glycoprotein domain [IPRO00858] (1)                                                                                                                                                                                                                                                                                          | -                           | C_ushii_00611_mRNA_12.1 | -                      |
| GF003898 | 0                        | 1                  | 0                   | Hypothetical protein (1)                                               | -                                                                                                                                                                                                                                                                 | Bull-type lectin domain [IPRO1480] (1)                                                                                                                                                                                                                                                                                                 | -                           | C_ushii_00611_mRNA_10.1 | -                      |
| GF003897 | 0                        | 1                  | 0                   | Hypothetical protein (1)                                               | zinc ion binding [GO:0008270 molecular_function] (1); nucleic acid binding [GO:0003676 molecular_function] (1)                                                                                                                                                    | Retroposin [IPRO18061] (1); Aspartic peptidase domain [IPRO2109] (1); Zinc finger, C2HC-type [IPRO1878] (1)                                                                                                                                                                                                                            | -                           | C_ushii_00610_mRNA_6.1  | -                      |
| GF003896 | 0                        | 1                  | 0                   | Hypothetical protein (1)                                               | proteolysis [GO:0006508 biological_process] (1); aspartic-type endopeptidase activity [GO:0004190 molecular_function] (1)                                                                                                                                         | Aspartic peptidase, active site [IPRO0169] (1); Peptidase A2A, renovirus, catalytic [IPRO1995] (1)                                                                                                                                                                                                                                     | -                           | C_ushii_00610_mRNA_5.1  | -                      |
| GF003895 | 0                        | 1                  | 0                   | Hypothetical protein (1)                                               | -                                                                                                                                                                                                                                                                 | Retroviral aspartyl protease [IPRO13242] (1)                                                                                                                                                                                                                                                                                           | -                           | C_ushii_00610_mRNA_2.1  | -                      |
| GF003894 | 0                        | 1                  | 0                   | Hypothetical protein (1)                                               | -                                                                                                                                                                                                                                                                 | -                                                                                                                                                                                                                                                                                                                                      | -                           | C_ushii_00610_mRNA_10.1 | -                      |
| GF003893 | 0                        | 1                  | 0                   | Hypothetical protein (1)                                               | -                                                                                                                                                                                                                                                                 | -                                                                                                                                                                                                                                                                                                                                      | -                           | C_ushii_00610_mRNA_1.1  | -                      |
| GF003892 | 0                        | 1                  | 0                   | Hypothetical protein (1)                                               | -                                                                                                                                                                                                                                                                 | -                                                                                                                                                                                                                                                                                                                                      | -                           | C_ushii_00609_mRNA_9.1  | -                      |
| GF003891 | 0                        | 1                  | 0                   | Hypothetical protein (1)                                               | -                                                                                                                                                                                                                                                                 | -                                                                                                                                                                                                                                                                                                                                      | -                           | C_ushii_00609_mRNA_3.1  | -                      |
| GF003890 | 0                        | 1                  | 0                   | Hypothetical protein (1)                                               | Trichome birefringence-like protein (1)                                                                                                                                                                                                                           | PC-Esterase [IPRO2657] (1); Trichome birefringence-like family [IPRO29962] (1)                                                                                                                                                                                                                                                         | -                           | C_ushii_00609_mRNA_12.1 | -                      |
| GF003889 | 0                        | 1                  | 0                   | B3 DNA-binding domain protein (1)                                      | DNA binding [GO:0003677 molecular_function] (1)                                                                                                                                                                                                                   | B3 DNA binding domain [IPRO03340] (1); DNA-binding pseudobacter domain [IPRO15300] (1)                                                                                                                                                                                                                                                 | -                           | C_ushii_00609_mRNA_1.1  | -                      |
| GF003888 | 0                        | 1                  | 0                   | Hypothetical protein (1)                                               | -                                                                                                                                                                                                                                                                 | -                                                                                                                                                                                                                                                                                                                                      | -                           | C_ushii_00608_mRNA_4.1  | -                      |
| GF003887 | 0                        | 1                  | 0                   | Hypothetical protein (1)                                               | -                                                                                                                                                                                                                                                                 | -                                                                                                                                                                                                                                                                                                                                      | -                           | C_ushii_00608_mRNA_3.1  | -                      |
| GF003886 | 0                        | 1                  | 0                   | Hypothetical protein (1)                                               | DNA binding [GO:0003677 molecular_function] (1)                                                                                                                                                                                                                   | Zinc finger, BED-type [IPRO03656] (1)                                                                                                                                                                                                                                                                                                  | -                           | C_ushii_00608_mRNA_2.1  | -                      |
| GF003885 | 0                        | 1                  | 0                   | Hypothetical protein (1)                                               | protein dimerization activity [GO:0046983 molecular_function] (1); O-methyltransferase activity [GO:0008171 molecular_function] (1); methyltransferase activity [GO:0008168 molecular_function] (1)                                                               | S-adenosyl-L-methionine-dependent methyltransferase [IPRO29603] (1); Winged helix-turn-helix DNA-binding domain [IPRO1599] (1); O-methyltransferase family 2 [IPRO1077] (1); Plant methyltransferase dimerization [IPRO12967] (1); O-methyltransferase COMT-type [IPRO1646] (1)                                                        | -                           | C_ushii_00607_mRNA_6.1  | -                      |
| GF003884 | 0                        | 1                  | 0                   | Caffeic acid 3-O-methyltransferase (1)                                 | O-methyltransferase activity [GO:0008171 molecular_function] (1); protein dimerization activity [GO:0046983 molecular_function] (1)                                                                                                                               | O-methyltransferase, family 2 [IPRO1077] (1); Winged helix-turn-helix DNA-binding domain [IPRO1599] (1); Plant methyltransferase dimerization [IPRO12967] (1); S-adenosyl-L-methionine-dependent methyltransferase [IPRO29603] (1)                                                                                                     | -                           | C_ushii_00607_mRNA_5.1  | -                      |
| GF003883 | 0                        | 1                  | 0                   | Hypothetical protein (1)                                               | -                                                                                                                                                                                                                                                                 | -                                                                                                                                                                                                                                                                                                                                      | -                           | C_ushii_00607_mRNA_4.1  | -                      |
| GF003882 | 0                        | 1                  | 0                   | Hypothetical protein (1)                                               | -                                                                                                                                                                                                                                                                 | -                                                                                                                                                                                                                                                                                                                                      | -                           | C_ushii_00607_mRNA_24.1 | -                      |
| GF003881 | 0                        | 1                  | 0                   | Hypothetical protein (1)                                               | -                                                                                                                                                                                                                                                                 | -                                                                                                                                                                                                                                                                                                                                      | -                           | C_ushii_00607_mRNA_21.1 | -                      |
| GF003880 | 0                        | 1                  | 0                   | Cytokinin riboside 5'-monophosphate phosphoribidohydrolase (1)         | -                                                                                                                                                                                                                                                                 | LOG family [IPRO31100] (1)                                                                                                                                                                                                                                                                                                             | -                           | C_ushii_00607_mRNA_16.1 | -                      |
| GF003879 | 0                        | 1                  | 0                   | Hypothetical protein (1)                                               | -                                                                                                                                                                                                                                                                 | Thioredoxin-like fold [IPRO12336] (1)                                                                                                                                                                                                                                                                                                  | -                           | C_ushii_00607_mRNA_12.1 | -                      |
| GF003878 | 0                        | 1                  | 0                   | Hypothetical protein (1)                                               | -                                                                                                                                                                                                                                                                 | -                                                                                                                                                                                                                                                                                                                                      | -                           | C_ushii_00607_mRNA_10.1 | -                      |
| GF003877 | 0                        | 1                  | 0                   | Hypothetical protein (1)                                               | oxidation-reduction process [GO:0055114 biological_process] (1); oxidoreductase activity [GO:0016941 molecular_function] (1); flavin adenine dinucleotide binding [GO:0050660 molecular_function] (1)                                                             | Berberine/berberine-like [IPRO1295] (1)                                                                                                                                                                                                                                                                                                | -                           | C_ushii_00606_mRNA_9.1  | -                      |
| GF003876 | 0                        | 1                  | 0                   | FAD-binding Berberine family protein (1)                               | oxidation-reduction process [GO:0055114 biological_process] (1); oxidoreductase activity [GO:0016941 molecular_function] (1); flavin adenine dinucleotide binding [GO:0050660 molecular_function] (1)                                                             | CO dehydrogenase flavoprotein-like, FAD-binding, subdomain 2 [IPRO16169] (1); FAD-binding, type 2, subdomain 1 [IPRO16167] (1); FAD-binding, type 2 [IPRO16166] (1); FAD-linked oxidase, N-terminal [IPRO0694] (1)                                                                                                                     | -                           | C_ushii_00606_mRNA_8.1  | -                      |
| GF003875 | 0                        | 1                  | 0                   | Hypothetical protein (1)                                               | -                                                                                                                                                                                                                                                                 | -                                                                                                                                                                                                                                                                                                                                      | -                           | C_ushii_00605_mRNA_9.1  | -                      |
| GF003874 | 0                        | 1                  | 0                   | Hypothetical protein (1)                                               | -                                                                                                                                                                                                                                                                 | P-loop containing nucleoside triphosphate hydrolase [IPRO27417] (1)                                                                                                                                                                                                                                                                    | -                           | C_ushii_00605_mRNA_8.1  | -                      |
| GF003873 | 0                        | 1                  | 0                   | Hypothetical protein (1)                                               | -                                                                                                                                                                                                                                                                 | -                                                                                                                                                                                                                                                                                                                                      | -                           | C_ushii_00605_mRNA_7.1  | -                      |
| GF003872 | 0                        | 1                  | 0                   | Hypothetical protein (1)                                               | -                                                                                                                                                                                                                                                                 | -                                                                                                                                                                                                                                                                                                                                      | -                           | C_ushii_00605_mRNA_6.1  | -                      |
| GF003871 | 0                        | 1                  | 0                   | Hypothetical protein (1)                                               | -                                                                                                                                                                                                                                                                 | Neurochordin [IPRO08709] (1)                                                                                                                                                                                                                                                                                                           | -                           | C_ushii_00605_mRNA_3.1  | -                      |
| GF003870 | 0                        | 1                  | 0                   | Hypothetical protein (1)                                               | -                                                                                                                                                                                                                                                                 | -                                                                                                                                                                                                                                                                                                                                      | -                           | C_ushii_00605_mRNA_2.1  | -                      |
| GF003869 | 0                        | 1                  | 0                   | Hypothetical protein (1)                                               | -                                                                                                                                                                                                                                                                 | -                                                                                                                                                                                                                                                                                                                                      | -                           | C_ushii_00605_mRNA_19.1 | -                      |
| GF003868 | 0                        | 1                  | 0                   | Hypothetical protein (1)                                               | -                                                                                                                                                                                                                                                                 | -                                                                                                                                                                                                                                                                                                                                      | -                           | C_ushii_00605_mRNA_14.1 | -                      |
| GF003867 | 0                        | 1                  | 0                   | Hypothetical protein (1)                                               | -                                                                                                                                                                                                                                                                 | -                                                                                                                                                                                                                                                                                                                                      | -                           | C_ushii_00605_mRNA_13.1 | -                      |
| GF003866 | 0                        | 1                  | 0                   | Hypothetical protein (1)                                               | -                                                                                                                                                                                                                                                                 | -                                                                                                                                                                                                                                                                                                                                      | -                           | C_ushii_00605_mRNA_12.1 | -                      |
| GF003865 | 0                        | 1                  | 0                   | Hypothetical protein (1)                                               | -                                                                                                                                                                                                                                                                 | -                                                                                                                                                                                                                                                                                                                                      | -                           | C_ushii_00605_mRNA_10.1 | -                      |
| GF003864 | 0                        | 1                  | 0                   | Hypothetical protein (1)                                               | -                                                                                                                                                                                                                                                                 | -                                                                                                                                                                                                                                                                                                                                      | -                           | C_ushii_00604_mRNA_3.1  | -                      |
| GF003863 | 0                        | 1                  | 0                   | Hypothetical protein (1)                                               | -                                                                                                                                                                                                                                                                 | -                                                                                                                                                                                                                                                                                                                                      | -                           | C_ushii_00604_mRNA_12.1 | -                      |
| GF003862 | 0                        | 1                  | 0                   | Hypothetical protein (1)                                               | -                                                                                                                                                                                                                                                                 | -                                                                                                                                                                                                                                                                                                                                      | -                           | C_ushii_00604_mRNA_1.1  | -                      |
| GF003861 | 0                        | 1                  | 0                   | Hypothetical protein (1)                                               | -                                                                                                                                                                                                                                                                 | Transcription factor BREVIS RADIX, N-terminal domain [IPRO27988] (1); PH domain-like [IPRO1992] (1); RhoGTPin homology domain [IPRO01849] (1); Brevis radix (BRX) domain [IPRO1359] (1)                                                                                                                                                | -                           | C_ushii_00603_mRNA_2.1  | -                      |
| GF003860 | 0                        | 1                  | 0                   | Hypothetical protein (1)                                               | -                                                                                                                                                                                                                                                                 | Endonuclease/exonuclease/phosphatase [IPRO05135] (1)                                                                                                                                                                                                                                                                                   | -                           | C_ushii_00602_mRNA_6.1  | -                      |
| GF003859 | 0                        | 1                  | 0                   | Hypothetical protein (1)                                               | -                                                                                                                                                                                                                                                                 | -                                                                                                                                                                                                                                                                                                                                      | -                           | C_ushii_00602_mRNA_5.1  | -                      |
| GF003858 | 0                        | 1                  | 0                   | Hypothetical protein (1)                                               | -                                                                                                                                                                                                                                                                 | -                                                                                                                                                                                                                                                                                                                                      | -                           | C_ushii_00602_mRNA_16.1 | -                      |
| GF003857 | 0                        | 1                  | 0                   | Hypothetical protein (1)                                               | -                                                                                                                                                                                                                                                                 | -                                                                                                                                                                                                                                                                                                                                      | -                           | C_ushii_00602_mRNA_14.1 | -                      |
| GF003856 | 0                        | 1                  | 0                   | Pentapeptide repeat-containing protein, chloroplast (1)                | -                                                                                                                                                                                                                                                                 | Pentapeptide repeat [IPRO02885] (1)                                                                                                                                                                                                                                                                                                    | -                           | C_ushii_00602_mRNA_12.1 | -                      |
| GF003855 | 0                        | 1                  | 0                   | Hypothetical protein (1)                                               | integral component of membrane [GO:0016021 cellular_component] (1)                                                                                                                                                                                                | P-type ATPase [IPRO1757] (1); P-type ATPase, transmembrane domain [IPRO2298] (1); HAD-like domain [IPRO2324] (1)                                                                                                                                                                                                                       | -                           | C_ushii_00601_mRNA_3.1  | -                      |
| GF003854 | 0                        | 1                  | 0                   | Hypothetical protein (1)                                               | -                                                                                                                                                                                                                                                                 | -                                                                                                                                                                                                                                                                                                                                      | -                           | C_ushii_00601_mRNA_2.1  | -                      |
| GF003853 | 0                        | 1                  | 0                   | Hypothetical protein (1)                                               | protein binding [GO:0005515 molecular_function] (1)                                                                                                                                                                                                               | WD40-repeat-containing domain [IPRO17960] (1); WD40/YWYW repeat-like-containing domain [IPRO15943] (1)                                                                                                                                                                                                                                 | -                           | C_ushii_00601_mRNA_19.1 | -                      |
| GF003852 | 0                        | 1                  | 0                   | Hypothetical protein (1)                                               | -                                                                                                                                                                                                                                                                 | -                                                                                                                                                                                                                                                                                                                                      | -                           | C_ushii_00601_mRNA_16.1 | -                      |
| GF003851 | 0                        | 1                  | 0                   | Heavy metal ATPase transporter (1)                                     | metal ion binding [GO:0004682 molecular_function] (1); integral component of membrane [GO:0016021 cellular_component] (1); nucleotide binding [GO:0000166 molecular_function] (1); metal ion transport [GO:0030001 biological_process] (1)                        | HAD-like domain [IPRO2324] (1); P-type ATPase, A domain [IPRO08250] (1); Heavy metal-associated domain, DNA [IPRO021] (1); P-type ATPase, phosphorylation site [IPRO18303] (1); P-type ATPase, cytoplasmic domain N [IPRO2298] (1); P-type ATPase, transmembrane domain [IPRO2298] (1); P-type ATPase [IPRO1757] (1)                   | -                           | C_ushii_00601_mRNA_12.1 | -                      |
| GF003850 | 0                        | 1                  | 0                   | Flavonoid 3',5'-hydroxylase (1)                                        | oxidation-reduction process [GO:0055114 biological_process] (1); oxidoreductase activity, acting on paired donors, with incorporation or reduction of molecular oxygen [GO:0016705 molecular_function] (1)                                                        | Cytochrome P450, E-class, group 1 [IPRO0240] (1); Cytochrome P450, conserved site [IPRO1792] (1); Cytochrome P450 [IPRO1128] (1)                                                                                                                                                                                                       | -                           | C_ushii_00601_mRNA_11.1 | -                      |
| GF003849 | 0                        | 1                  | 0                   | Hypothetical protein (1)                                               | -                                                                                                                                                                                                                                                                 | Aspartic peptidase domain [IPRO21109] (1)                                                                                                                                                                                                                                                                                              | -                           | C_ushii_00601_mRNA_1.1  | -                      |
| GF003848 | 0                        | 1                  | 0                   | Hypothetical protein (1)                                               | -                                                                                                                                                                                                                                                                 | -                                                                                                                                                                                                                                                                                                                                      | -                           | C_ushii_00600_mRNA_9.1  | -                      |
| GF003847 | 0                        | 1                  | 0                   | Hypothetical protein (1)                                               | -                                                                                                                                                                                                                                                                 | -                                                                                                                                                                                                                                                                                                                                      | -                           | C_ushii_00600_mRNA_24.1 | -                      |
| GF003846 | 0                        | 1                  | 0                   | Hypothetical protein (1)                                               | -                                                                                                                                                                                                                                                                 | -                                                                                                                                                                                                                                                                                                                                      | -                           | C_ushii_00600_mRNA_22.1 | -                      |
| GF003845 | 0                        | 1                  | 0                   | Hypothetical protein (1)                                               | -                                                                                                                                                                                                                                                                 | -                                                                                                                                                                                                                                                                                                                                      | -                           | C_ushii_00600_mRNA_2.1  | -                      |
| GF003844 | 0                        | 1                  | 0                   | Hypothetical protein (1)                                               | -                                                                                                                                                                                                                                                                 | -                                                                                                                                                                                                                                                                                                                                      | -                           | C_ushii_00600_mRNA_12.1 | -                      |
| GF003843 | 0                        | 1                  | 0                   | Hypothetical protein (1)                                               | -                                                                                                                                                                                                                                                                 | -                                                                                                                                                                                                                                                                                                                                      | -                           | C_ushii_00600_mRNA_11.1 | -                      |
| GF003842 | 0                        | 1                  | 0                   | Hypothetical protein (1)                                               | -                                                                                                                                                                                                                                                                 | -                                                                                                                                                                                                                                                                                                                                      | -                           | C_ushii_00600_mRNA_10.1 | -                      |
| GF003841 | 0                        | 1                  | 0                   | Hypothetical protein (1)                                               | -                                                                                                                                                                                                                                                                 | -                                                                                                                                                                                                                                                                                                                                      | -                           | C_ushii_00600_mRNA_1.1  | -                      |
| GF003840 | 0                        | 1                  | 0                   | Hypothetical protein (1)                                               | microtubule [GO:0005874 cellular_component] (1); microtubule-based process [GO:0007017 biological_process] (1)                                                                                                                                                    | Tubulin [IPRO00217] (1); Tubulin/FtsZ, 2-layer sandwich domain [IPRO18316] (1); Tubulin/FtsZ, C-terminal [IPRO0280] (1)                                                                                                                                                                                                                | -                           | C_ushii_00599_mRNA_8.1  | -                      |
| GF003839 | 0                        | 1                  | 0                   | Hypothetical protein (1)                                               | -                                                                                                                                                                                                                                                                 | -                                                                                                                                                                                                                                                                                                                                      | -                           | C_ushii_00599_mRNA_25.1 | -                      |
| GF003838 | 0                        | 1                  | 0                   | Hypothetical protein (1)                                               | -                                                                                                                                                                                                                                                                 | -                                                                                                                                                                                                                                                                                                                                      | -                           | C_ushii_00599_mRNA_23.1 | -                      |
| GF003837 | 0                        | 1                  | 0                   | Hypothetical protein (1)                                               | transmembrane transporter activity [GO:0022857 molecular_function] (1); integral component of membrane [GO:0016021 cellular_component] (1); transmembrane transport [GO:0055085 biological_process] (1); transporter activity [GO:0005215 molecular_function] (1) | Major facilitator superfamily domain [IPRO20846] (1); Sugar transporter, conserved site [IPRO0529] (1); Major facilitator, sugar transporter-like [IPRO0528] (1)                                                                                                                                                                       | -                           | C_ushii_00599_mRNA_22.1 | -                      |
| GF003836 | 0                        | 1                  | 0                   | Hypothetical protein (1)                                               | -                                                                                                                                                                                                                                                                 | -                                                                                                                                                                                                                                                                                                                                      | -                           | C_ushii_00599_mRNA_2.1  | -                      |
| GF003835 | 0                        | 1                  | 0                   | Hypothetical protein (1)                                               | -                                                                                                                                                                                                                                                                 | -                                                                                                                                                                                                                                                                                                                                      | -                           | C_ushii_00599_mRNA_1.1  | -                      |
| GF003834 | 0                        | 1                  | 0                   | Hypothetical protein (1)                                               | -                                                                                                                                                                                                                                                                 | -                                                                                                                                                                                                                                                                                                                                      | -                           | C_ushii_00598_mRNA_3.1  | -                      |
| GF003833 | 0                        | 1                  | 0                   | Cytokinin riboside 5'-monophosphate phosphoribidohydrolase (1)         | -                                                                                                                                                                                                                                                                 | LOG family [IPRO31100] (1)                                                                                                                                                                                                                                                                                                             | -                           | C_ushii_00598_mRNA_2.1  | -                      |
| GF003832 | 0                        | 1                  | 0                   | Hypothetical protein (1)                                               | -                                                                                                                                                                                                                                                                 | -                                                                                                                                                                                                                                                                                                                                      | -                           | C_ushii_00598_mRNA_14.1 | -                      |
| GF003831 | 0                        | 1                  | 0                   | Hypothetical protein (1)                                               | nucleic acid binding [GO:0003676 molecular_function] (1)                                                                                                                                                                                                          | Rhombase H-like domain [IPRO12337] (1)                                                                                                                                                                                                                                                                                                 | -                           | C_ushii_00598_mRNA_10.1 | -                      |
| GF003830 | 0                        | 1                  | 0                   | Hypothetical protein (1)                                               | -                                                                                                                                                                                                                                                                 | -                                                                                                                                                                                                                                                                                                                                      | -                           | C_ushii_00598_mRNA_1.1  | -                      |
| GF003829 | 0                        | 1                  | 0                   | Hypothetical protein (1)                                               | -                                                                                                                                                                                                                                                                 | -                                                                                                                                                                                                                                                                                                                                      | -                           | C_ushii_00597_mRNA_8.1  | -                      |
| GF003828 | 0                        | 1                  | 0                   | Hypothetical protein (1)                                               | protein dimerization activity [GO:0046983 molecular_function] (1)                                                                                                                                                                                                 | HAT, C-terminal dimerization domain [IPRO08906] (1)                                                                                                                                                                                                                                                                                    | -                           | C_ushii_00597_mRNA_5.1  | -                      |

| ID        | Num. in <i>C. crotolariae</i> | Num in <i>C. caudata</i> | Num in <i>P. trifidata</i> | Note                                                                      | GO                                                                                                                                                                                                                                                                                                                                                                                                                            | InterPro                                                                                                                                                                                                                                                                                                                                                                                                                              | Members in <i>Crotolariae</i> | Members in <i>Caudata</i> | Members in <i>Trifidata</i> |
|-----------|-------------------------------|--------------------------|----------------------------|---------------------------------------------------------------------------|-------------------------------------------------------------------------------------------------------------------------------------------------------------------------------------------------------------------------------------------------------------------------------------------------------------------------------------------------------------------------------------------------------------------------------|---------------------------------------------------------------------------------------------------------------------------------------------------------------------------------------------------------------------------------------------------------------------------------------------------------------------------------------------------------------------------------------------------------------------------------------|-------------------------------|---------------------------|-----------------------------|
| GF0038027 | 0                             | 1                        | 0                          | Hypothetical protein (1)                                                  | nucleic acid binding [GO:0003676 molecular_function] (1); zinc ion binding [GO:0008270 molecular_function] (1)                                                                                                                                                                                                                                                                                                                | Zinc finger, CCHC-type [IPRO01878] (1)                                                                                                                                                                                                                                                                                                                                                                                                | -                             | C_ushii_00597_mRNA_2,1    | -                           |
| GF0038026 | 0                             | 1                        | 0                          | Hypothetical protein (1)                                                  | -                                                                                                                                                                                                                                                                                                                                                                                                                             | -                                                                                                                                                                                                                                                                                                                                                                                                                                     | -                             | C_ushii_00597_mRNA_12,1   | -                           |
| GF0038025 | 0                             | 1                        | 0                          | Hypothetical protein (1)                                                  | -                                                                                                                                                                                                                                                                                                                                                                                                                             | -                                                                                                                                                                                                                                                                                                                                                                                                                                     | -                             | C_ushii_00597_mRNA_10,1   | -                           |
| GF0038024 | 0                             | 1                        | 0                          | Hypothetical protein (1)                                                  | -                                                                                                                                                                                                                                                                                                                                                                                                                             | Histone-binding protein RBBP4, N-terminal [IPRO22052] (1)                                                                                                                                                                                                                                                                                                                                                                             | -                             | C_ushii_00596_mRNA_7,1    | -                           |
| GF0038023 | 0                             | 1                        | 0                          | Hypothetical protein (1)                                                  | -                                                                                                                                                                                                                                                                                                                                                                                                                             | -                                                                                                                                                                                                                                                                                                                                                                                                                                     | -                             | C_ushii_00596_mRNA_17,1   | -                           |
| GF0038022 | 0                             | 1                        | 0                          | Caffeic acid O-methyltransferase (1)                                      | protein dimerization activity [GO:0046983 molecular_function] (1); O-methyltransferase activity [GO:0008171 molecular_function] (1); methyltransferase activity [GO:0008168 molecular_function] (1)                                                                                                                                                                                                                           | Winged helix-turn-helix DNA-binding domain [IPRO11991] (1); O-methyltransferase, family 2 [IPRO01077] (1); O-methyltransferase COMT-type [IPRO16461] (1); Plant methyltransferase dimerization [IPRO12670] (1); adenosyl-L-methionine-dependent methyltransferase [IPRO29063] (1); SH2 domain [IPRO00989] (1)                                                                                                                         | -                             | C_ushii_00596_mRNA_15,1   | -                           |
| GF0038021 | 0                             | 1                        | 0                          | Hypothetical protein (1)                                                  | -                                                                                                                                                                                                                                                                                                                                                                                                                             | -                                                                                                                                                                                                                                                                                                                                                                                                                                     | -                             | C_ushii_00595_mRNA_25,1   | -                           |
| GF0038020 | 0                             | 1                        | 0                          | Hypothetical protein (1)                                                  | -                                                                                                                                                                                                                                                                                                                                                                                                                             | -                                                                                                                                                                                                                                                                                                                                                                                                                                     | -                             | C_ushii_00595_mRNA_23,1   | -                           |
| GF0038019 | 0                             | 1                        | 0                          | Hypothetical protein (1)                                                  | ADP binding [GO:0043531 molecular_function] (1)                                                                                                                                                                                                                                                                                                                                                                               | P-loop containing nucleoside triphosphate hydrolase [IPRO27417] (1); NB-ARC [IPRO21812] (1)                                                                                                                                                                                                                                                                                                                                           | -                             | C_ushii_00595_mRNA_21,1   | -                           |
| GF0038018 | 0                             | 1                        | 0                          | Hypothetical protein (1)                                                  | -                                                                                                                                                                                                                                                                                                                                                                                                                             | -                                                                                                                                                                                                                                                                                                                                                                                                                                     | -                             | C_ushii_00595_mRNA_17,1   | -                           |
| GF0038017 | 0                             | 1                        | 0                          | Transmembrane protein 14C (1)                                             | membrane [GO:0016029 cellular_component] (1)                                                                                                                                                                                                                                                                                                                                                                                  | TMEM14 family [IPRO05349] (1)                                                                                                                                                                                                                                                                                                                                                                                                         | -                             | C_ushii_00595_mRNA_12,1   | -                           |
| GF0038016 | 0                             | 1                        | 0                          | Hypothetical protein (1)                                                  | -                                                                                                                                                                                                                                                                                                                                                                                                                             | -                                                                                                                                                                                                                                                                                                                                                                                                                                     | -                             | C_ushii_00594_mRNA_3,1    | -                           |
| GF0038015 | 0                             | 1                        | 0                          | Hypothetical protein (1)                                                  | regulation of transcription, DNA-templated [GO:0006355 biological_process] (1)                                                                                                                                                                                                                                                                                                                                                | FHY3/FAR1 family [IPRO11052] (1)                                                                                                                                                                                                                                                                                                                                                                                                      | -                             | C_ushii_00594_mRNA_11,1   | -                           |
| GF0038014 | 0                             | 1                        | 0                          | Hypothetical protein (1)                                                  | -                                                                                                                                                                                                                                                                                                                                                                                                                             | -                                                                                                                                                                                                                                                                                                                                                                                                                                     | -                             | C_ushii_00593_mRNA_4,1    | -                           |
| GF0038013 | 0                             | 1                        | 0                          | Hypothetical protein (1)                                                  | proton-transporting ATP synthase complex, coupling factor F(o) [GO:0042363 cellular_component] (1); hydrogen ion transmembrane transporter activity [GO:0015078 molecular_function] (1); ATP synthesis coupled proton transport [GO:0015986 biological_process] (1)                                                                                                                                                           | ATPase, F0 complex, subunit C [IPRO00454] (1)                                                                                                                                                                                                                                                                                                                                                                                         | -                             | C_ushii_00593_mRNA_2,1    | -                           |
| GF0038012 | 0                             | 1                        | 0                          | Hypothetical protein (1)                                                  | nucleic acid binding [GO:0003676 molecular_function] (1)                                                                                                                                                                                                                                                                                                                                                                      | Ribonuclease H-like domain [IPRO12337] (1)                                                                                                                                                                                                                                                                                                                                                                                            | -                             | C_ushii_00593_mRNA_11,1   | -                           |
| GF0038011 | 0                             | 1                        | 0                          | Hypothetical protein (1)                                                  | nucleic acid binding [GO:0003676 molecular_function] (1)                                                                                                                                                                                                                                                                                                                                                                      | Ribonuclease H-like domain [IPRO12337] (1); Reverse transcriptase zinc-binding domain [IPRO20960] (1); Reverse transcriptase domain [IPRO0677] (1)                                                                                                                                                                                                                                                                                    | -                             | C_ushii_00593_mRNA_1,1    | -                           |
| GF0038010 | 0                             | 1                        | 0                          | Hypothetical protein (1)                                                  | -                                                                                                                                                                                                                                                                                                                                                                                                                             | -                                                                                                                                                                                                                                                                                                                                                                                                                                     | -                             | C_ushii_00592_mRNA_5,1    | -                           |
| GF0038009 | 0                             | 1                        | 0                          | Hypothetical protein (1)                                                  | -                                                                                                                                                                                                                                                                                                                                                                                                                             | -                                                                                                                                                                                                                                                                                                                                                                                                                                     | -                             | C_ushii_00591_mRNA_9,1    | -                           |
| GF0038008 | 0                             | 1                        | 0                          | Hypothetical protein (1)                                                  | -                                                                                                                                                                                                                                                                                                                                                                                                                             | -                                                                                                                                                                                                                                                                                                                                                                                                                                     | -                             | C_ushii_00591_mRNA_7,1    | -                           |
| GF0038007 | 0                             | 1                        | 0                          | Hypothetical protein (1)                                                  | -                                                                                                                                                                                                                                                                                                                                                                                                                             | -                                                                                                                                                                                                                                                                                                                                                                                                                                     | -                             | C_ushii_00591_mRNA_3,1    | -                           |
| GF0038006 | 0                             | 1                        | 0                          | Elongation factor EF-2 (1)                                                | GTP binding [GO:0005525 molecular_function] (1)                                                                                                                                                                                                                                                                                                                                                                               | Ribosomal protein S5 domain 2-type fold [IPRO25681] (1); Elongation factor G, III-V domain [IPRO09022] (1); Translation elongation factor EF2/EFA, domain 2 [IPRO04161] (1); Ribosomal protein S5 domain 2-type fold, subgroup [IPRO14721] (1); Translation elongation factor EFG/E2, domain IV [IPRO05317] (1); Translation protein, beta-barrel domain [IPRO09000] (1); Translation elongation factor EFG, V domain [IPRO06640] (1) | -                             | C_ushii_00591_mRNA_15,2   | -                           |
| GF0038005 | 0                             | 1                        | 0                          | Hypothetical protein (1)                                                  | -                                                                                                                                                                                                                                                                                                                                                                                                                             | -                                                                                                                                                                                                                                                                                                                                                                                                                                     | -                             | C_ushii_00591_mRNA_10,1   | -                           |
| GF0038004 | 0                             | 1                        | 0                          | Cakineurin-like metallo-phosphoesterase superfamily protein isoform 1 (1) | hydrolase activity [GO:0016787 molecular_function] (1)                                                                                                                                                                                                                                                                                                                                                                        | Cakineurin-like phosphoesterase domain, apal1 type [IPRO04843] (1); Metallo-dependent phosphatase-like [IPRO20952] (1); Conserved hypothetical protein CHPM168 [IPRO27629] (1)                                                                                                                                                                                                                                                        | -                             | C_ushii_00590_mRNA_8,1    | -                           |
| GF0038003 | 0                             | 1                        | 0                          | Type B response regulator (1)                                             | signal transduction [GO:0007165 biological_process] (1); transcription factor activity, sequence-specific DNA binding [GO:0003700 molecular_function] (1); phosphorylase signal transduction system [GO:0000166 biological_process] (1); DNA binding [GO:0003677 molecular_function] (1)                                                                                                                                      | Mylb domain [IPRO17901] (1); Myb domain, plant [IPRO06447] (1); SANT/Myb domain [IPRO10057] (1); Helicase domain-like [IPRO09571] (1); Signal transduction response regulator, receiver domain [IPRO1790] (1); CheY-like superfamily [IPRO11006] (1); Response regulator B-type, plant [IPRO11053] (1)                                                                                                                                | -                             | C_ushii_00590_mRNA_6,1    | -                           |
| GF0038002 | 0                             | 1                        | 0                          | Temperature-induced lipocalin (1)                                         | -                                                                                                                                                                                                                                                                                                                                                                                                                             | Calcium [IPRO12574] (1); Lipocalin/cytosolic fatty-acid binding domain [IPRO00066] (1); Calcine-like [IPRO11030] (1); Lipocalin family conserved site [IPRO22272] (1)                                                                                                                                                                                                                                                                 | -                             | C_ushii_00590_mRNA_3,1    | -                           |
| GF0038001 | 0                             | 1                        | 0                          | VAMP-like protein YKT61 (1)                                               | transport [GO:0006010 biological_process] (1); integral component of membrane [GO:0016021 cellular_component] (1); vesicle-mediated transport [GO:0016192 biological_process] (1)                                                                                                                                                                                                                                             | Longin domain [IPRO10968] (1); Longin-like domain [IPRO11012] (1); Synaptobrevin [IPRO11388] (1)                                                                                                                                                                                                                                                                                                                                      | -                             | C_ushii_00590_mRNA_2,1    | -                           |
| GF0038000 | 0                             | 1                        | 0                          | Hypothetical protein (1)                                                  | -                                                                                                                                                                                                                                                                                                                                                                                                                             | Endonuclease/exonuclease/phosphatase [IPRO01135] (1)                                                                                                                                                                                                                                                                                                                                                                                  | -                             | C_ushii_00590_mRNA_18,1   | -                           |
| GF0037999 | 0                             | 1                        | 0                          | Eukaryotic translation initiation factor 5A (1)                           | RNA binding [GO:0003723 molecular_function] (1); translational frameshifting [GO:0006452 biological_process] (1); ribosome binding [GO:0049322 molecular_function] (1); translation elongation factor activity [GO:0003746 molecular_function] (1); positive regulation of translational termination [GO:0045905 biological_process] (1); positive regulation of translational elongation [GO:0045901 biological_process] (1) | Translation protein SH3-like domain [IPRO08991] (1); Translation elongation factor, I5A, hypusine site [IPRO19769] (1); Nucleic acid-binding, O16-60d [IPRO12401] (1); Ribosomal protein L2 domain 2 [IPRO14722] (1); Translation elongation factor I5A [IPRO01884] (1); Translation elongation factor, I5A C-terminal [IPRO20189] (1)                                                                                                | -                             | C_ushii_00590_mRNA_13,1   | -                           |
| GF0037998 | 0                             | 1                        | 0                          | Hypothetical protein (1)                                                  | phosphoric diester hydrolase activity [GO:0008881 molecular_function] (1); lipid metabolic process [GO:0006629 biological_process] (1)                                                                                                                                                                                                                                                                                        | Glycerophosphodiester phosphodiesterase domain [IPRO30195] (1); PLC-like phosphodiesterase, TIM beta/alpha-barrel domain [IPRO19540] (1)                                                                                                                                                                                                                                                                                              | -                             | C_ushii_00590_mRNA_1,1    | -                           |
| GF0037997 | 0                             | 1                        | 0                          | Polygalacturonase inhibitor (PGPI) (1)                                    | protein binding [GO:0005515 molecular_function] (1)                                                                                                                                                                                                                                                                                                                                                                           | Leucine-rich repeat [IPRO01611] (1); Leucine-rich repeat domain, I domain-like [IPRO03075] (1)                                                                                                                                                                                                                                                                                                                                        | -                             | C_ushii_00589_mRNA_8,1    | -                           |
| GF0037996 | 0                             | 1                        | 0                          | Hypothetical protein (1)                                                  | ATP binding [GO:0005524 molecular_function] (1); protein phosphorylation [GO:0006468 biological_process] (1); protein kinase activity [GO:0004672 molecular_function] (1)                                                                                                                                                                                                                                                     | Protein kinase-like domain [IPRO11009] (1); Alpha/beta hydrolase fold-1 [IPRO00073] (1); Alpha/beta hydrolase fold [IPRO00058] (1); Protein kinase domain [IPRO00719] (1); Serine/threonine/dual specificity protein kinase, catalytic domain [IPRO02290] (1); Protein kinase, ATP binding site [IPRO17441] (1); Serine/threonine-protein kinase, active site [IPRO08271] (1)                                                         | -                             | C_ushii_00589_mRNA_6,1    | -                           |
| GF0037995 | 0                             | 1                        | 0                          | Hypothetical protein (1)                                                  | -                                                                                                                                                                                                                                                                                                                                                                                                                             | -                                                                                                                                                                                                                                                                                                                                                                                                                                     | -                             | C_ushii_00589_mRNA_5,1    | -                           |
| GF0037994 | 0                             | 1                        | 0                          | PPR containing plant-like protein (1)                                     | protein binding [GO:0005515 molecular_function] (1); endonuclease activity [GO:0004519 molecular_function] (1)                                                                                                                                                                                                                                                                                                                | Homing endonuclease, LAGLIDADG [IPRO04860] (1); Pentatricopeptide repeat [IPRO02885] (1); SWIRM/DMZ domain [IPRO03121] (1); SWIB domain [IPRO19853] (1); Homing endonuclease [IPRO27434] (1); Tetra- or peptide-like helical domain [IPRO11990] (1)                                                                                                                                                                                   | -                             | C_ushii_00589_mRNA_3,1    | -                           |
| GF0037993 | 0                             | 1                        | 0                          | Sorting nexin carboxy-terminal protein (1)                                | zinc ion binding [GO:0008270 molecular_function] (1); protein phosphorylation [GO:0006468 biological_process] (1); phosphatidylinositol binding [GO:0035991 molecular_function] (1); nucleic acid binding [GO:0003676 molecular_function] (1)                                                                                                                                                                                 | Zinc finger, CCHC-type [IPRO01878] (1); Zinc finger, SWIM-type [IPRO07571] (1); Sorting nexin, C-terminal [IPRO13937] (1); Phox homology domain [IPRO01683] (1); Zinc finger, PMZ-type [IPRO06564] (1)                                                                                                                                                                                                                                | -                             | C_ushii_00589_mRNA_13,1   | -                           |
| GF0037992 | 0                             | 1                        | 0                          | Hypothetical protein (1)                                                  | -                                                                                                                                                                                                                                                                                                                                                                                                                             | -                                                                                                                                                                                                                                                                                                                                                                                                                                     | -                             | C_ushii_00588_mRNA_9,1    | -                           |
| GF0037991 | 0                             | 1                        | 0                          | Hypothetical protein (1)                                                  | -                                                                                                                                                                                                                                                                                                                                                                                                                             | -                                                                                                                                                                                                                                                                                                                                                                                                                                     | -                             | C_ushii_00588_mRNA_17,1   | -                           |
| GF0037990 | 0                             | 1                        | 0                          | Putative RNA-directed DNA polymerase (1)                                  | -                                                                                                                                                                                                                                                                                                                                                                                                                             | -                                                                                                                                                                                                                                                                                                                                                                                                                                     | -                             | C_ushii_00588_mRNA_14,1   | -                           |
| GF0037889 | 0                             | 1                        | 0                          | Hypothetical protein (1)                                                  | -                                                                                                                                                                                                                                                                                                                                                                                                                             | -                                                                                                                                                                                                                                                                                                                                                                                                                                     | -                             | C_ushii_00587_mRNA_8,1    | -                           |
| GF0037888 | 0                             | 1                        | 0                          | Hypothetical protein (1)                                                  | -                                                                                                                                                                                                                                                                                                                                                                                                                             | -                                                                                                                                                                                                                                                                                                                                                                                                                                     | -                             | C_ushii_00587_mRNA_5,1    | -                           |
| GF0037887 | 0                             | 1                        | 0                          | Hypothetical protein (1)                                                  | -                                                                                                                                                                                                                                                                                                                                                                                                                             | -                                                                                                                                                                                                                                                                                                                                                                                                                                     | -                             | C_ushii_00587_mRNA_18,1   | -                           |
| GF0037886 | 0                             | 1                        | 0                          | Hypothetical protein (1)                                                  | -                                                                                                                                                                                                                                                                                                                                                                                                                             | -                                                                                                                                                                                                                                                                                                                                                                                                                                     | -                             | C_ushii_00587_mRNA_11,1   | -                           |
| GF0037885 | 0                             | 1                        | 0                          | Hypothetical protein (1)                                                  | -                                                                                                                                                                                                                                                                                                                                                                                                                             | -                                                                                                                                                                                                                                                                                                                                                                                                                                     | -                             | C_ushii_00586_mRNA_19,1   | -                           |
| GF0037884 | 0                             | 1                        | 0                          | Hypothetical protein (1)                                                  | -                                                                                                                                                                                                                                                                                                                                                                                                                             | -                                                                                                                                                                                                                                                                                                                                                                                                                                     | -                             | C_ushii_00586_mRNA_18,1   | -                           |
| GF0037883 | 0                             | 1                        | 0                          | Hypothetical protein (1)                                                  | -                                                                                                                                                                                                                                                                                                                                                                                                                             | -                                                                                                                                                                                                                                                                                                                                                                                                                                     | -                             | C_ushii_00586_mRNA_17,1   | -                           |
| GF0037882 | 0                             | 1                        | 0                          | Hypothetical protein (1)                                                  | -                                                                                                                                                                                                                                                                                                                                                                                                                             | Glutamine amidotransferase type 2 domain [IPRO17932] (1); Nucleophilic aminoalcoholases, N-terminal [IPRO29055] (1)                                                                                                                                                                                                                                                                                                                   | -                             | C_ushii_00586_mRNA_15,1   | -                           |
| GF0037881 | 0                             | 1                        | 0                          | Hypothetical protein (1)                                                  | -                                                                                                                                                                                                                                                                                                                                                                                                                             | -                                                                                                                                                                                                                                                                                                                                                                                                                                     | -                             | C_ushii_00586_mRNA_12,1   | -                           |
| GF0037880 | 0                             | 1                        | 0                          | Hypothetical protein (1)                                                  | -                                                                                                                                                                                                                                                                                                                                                                                                                             | -                                                                                                                                                                                                                                                                                                                                                                                                                                     | -                             | C_ushii_00586_mRNA_1,1    | -                           |
| GF0037979 | 0                             | 1                        | 0                          | Hypothetical protein (1)                                                  | -                                                                                                                                                                                                                                                                                                                                                                                                                             | -                                                                                                                                                                                                                                                                                                                                                                                                                                     | -                             | C_ushii_00585_mRNA_31,1   | -                           |
| GF0037978 | 0                             | 1                        | 0                          | Putative WRKY transcription factor 19 (1)                                 | -                                                                                                                                                                                                                                                                                                                                                                                                                             | Leucine-rich repeat domain, I domain-like [IPRO02675] (1)                                                                                                                                                                                                                                                                                                                                                                             | -                             | C_ushii_00585_mRNA_29,1   | -                           |
| GF0037977 | 0                             | 1                        | 0                          | NBS type disease resistance protein (1)                                   | ADP binding [GO:0043531 molecular_function] (1)                                                                                                                                                                                                                                                                                                                                                                               | Leucine-rich repeat 3 [IPRO11713] (1); Winged helix-turn-helix DNA-binding domain [IPRO11991] (1); Leucine-rich repeat domain, I domain-like [IPRO02675] (1); P-loop containing nucleoside triphosphate hydrolase [IPRO27417] (1); NB-ARC [IPRO21812] (1)                                                                                                                                                                             | -                             | C_ushii_00585_mRNA_26,1   | -                           |
| GF0037976 | 0                             | 1                        | 0                          | Hypothetical protein (1)                                                  | -                                                                                                                                                                                                                                                                                                                                                                                                                             | -                                                                                                                                                                                                                                                                                                                                                                                                                                     | -                             | C_ushii_00585_mRNA_24,1   | -                           |
| GF0037975 | 0                             | 1                        | 0                          | Hypothetical protein (1)                                                  | -                                                                                                                                                                                                                                                                                                                                                                                                                             | -                                                                                                                                                                                                                                                                                                                                                                                                                                     | -                             | C_ushii_00585_mRNA_23,1   | -                           |
| GF0037974 | 0                             | 1                        | 0                          | Hypothetical protein (1)                                                  | -                                                                                                                                                                                                                                                                                                                                                                                                                             | -                                                                                                                                                                                                                                                                                                                                                                                                                                     | -                             | C_ushii_00585_mRNA_22,1   | -                           |
| GF0037973 | 0                             | 1                        | 0                          | Hypothetical protein (1)                                                  | -                                                                                                                                                                                                                                                                                                                                                                                                                             | -                                                                                                                                                                                                                                                                                                                                                                                                                                     | -                             | C_ushii_00585_mRNA_21,1   | -                           |
| GF0037972 | 0                             | 1                        | 0                          | Hypothetical protein (1)                                                  | -                                                                                                                                                                                                                                                                                                                                                                                                                             | -                                                                                                                                                                                                                                                                                                                                                                                                                                     | -                             | C_ushii_00585_mRNA_19,1   | -                           |



| ID        | Num. in C. crottenstei | Num. in C. caudib | Num. in P. putidum | Note                                                                | GO                                                                                                                                                                                                                                                                                                                                                                         | InterPro                                                                                                                                                                                                                                                                                                                                                                                                                      | Members in C. crottenstei | Members in C. caudib     | Members in P. putidum |
|-----------|------------------------|-------------------|--------------------|---------------------------------------------------------------------|----------------------------------------------------------------------------------------------------------------------------------------------------------------------------------------------------------------------------------------------------------------------------------------------------------------------------------------------------------------------------|-------------------------------------------------------------------------------------------------------------------------------------------------------------------------------------------------------------------------------------------------------------------------------------------------------------------------------------------------------------------------------------------------------------------------------|---------------------------|--------------------------|-----------------------|
| GF0037895 | 0                      | 1                 | 0                  | Hypothetical protein (1)                                            |                                                                                                                                                                                                                                                                                                                                                                            |                                                                                                                                                                                                                                                                                                                                                                                                                               |                           | C_unihir_00573_mRNA_11.1 | -                     |
| GF0037894 | 0                      | 1                 | 0                  | Putative disease resistance protein (1)                             |                                                                                                                                                                                                                                                                                                                                                                            | Leucine-rich repeat domain, L domain-like [IPR022675] (1)                                                                                                                                                                                                                                                                                                                                                                     |                           | C_unihir_00573_mRNA_1.1  | -                     |
| GF0037893 | 0                      | 1                 | 0                  | Hypothetical protein (1)                                            | protein phosphorylation [GO:0006468 biological_process] (1); protein kinase activity [GO:0004672 molecular_function] (1); ATP binding [GO:0005524 molecular_function] (1)                                                                                                                                                                                                  | Protein kinase domain [IPR000719] (1); Protein kinase-like domain [IPR011009] (1); Serine/threonine dual specificity protein kinase catalytic domain [IPR029019] (1)                                                                                                                                                                                                                                                          |                           | C_unihir_00571_mRNA_24.2 | -                     |
| GF0037892 | 0                      | 1                 | 0                  | Heat shock protein 70 (1)                                           |                                                                                                                                                                                                                                                                                                                                                                            | Heat shock protein 70 family [IPR01320] (1); Heat shock protein 70, conserved site [IPR018181] (1); Heat shock protein 70, repeat-binding domain [IPR029047] (1)                                                                                                                                                                                                                                                              |                           | C_unihir_00571_mRNA_21.1 | -                     |
| GF0037891 | 0                      | 1                 | 0                  | Hypothetical protein (1)                                            |                                                                                                                                                                                                                                                                                                                                                                            |                                                                                                                                                                                                                                                                                                                                                                                                                               |                           | C_unihir_00571_mRNA_2.1  | -                     |
| GF0037890 | 0                      | 1                 | 0                  | Heat shock protein 70 (1)                                           |                                                                                                                                                                                                                                                                                                                                                                            | Heat shock protein 70 family [IPR01320] (1); Heat shock protein 70, conserved site [IPR018181] (1); Heat shock protein 70, C-terminal domain [IPR029048] (1); Heat shock protein 70, repeat-binding domain [IPR029047] (1)                                                                                                                                                                                                    |                           | C_unihir_00571_mRNA_19.1 | -                     |
| GF0037889 | 0                      | 1                 | 0                  | Hypothetical protein (1)                                            |                                                                                                                                                                                                                                                                                                                                                                            |                                                                                                                                                                                                                                                                                                                                                                                                                               |                           | C_unihir_00571_mRNA_18.1 | -                     |
| GF0037888 | 0                      | 1                 | 0                  | Hypothetical protein (1)                                            |                                                                                                                                                                                                                                                                                                                                                                            |                                                                                                                                                                                                                                                                                                                                                                                                                               |                           | C_unihir_00571_mRNA_17.1 | -                     |
| GF0037887 | 0                      | 1                 | 0                  | U-box domain-containing protein kinase family protein isoform 1 (1) | protein phosphorylation [GO:0006468 biological_process] (1); protein kinase activity [GO:0004672 molecular_function] (1); ATP binding [GO:0005524 molecular_function] (1)                                                                                                                                                                                                  | Concanavalin A-like lectin/glycosylase domain [IPR03320] (1); Protein kinase-like domain [IPR011009] (1); Protein kinase domain [IPR000719] (1); Serine/threonine tyrosine protein kinase catalytic domain [IPR012451] (1); Serine/threonine dual specificity protein kinase catalytic domain [IPR029019] (1); Protein kinase, ATP binding site [IPR017441] (1); Serine/threonine-protein kinase, active site [IPR006271] (1) |                           | C_unihir_00571_mRNA_1.1  | -                     |
| GF0037886 | 0                      | 1                 | 0                  | Hypothetical protein (1)                                            |                                                                                                                                                                                                                                                                                                                                                                            |                                                                                                                                                                                                                                                                                                                                                                                                                               |                           | C_unihir_00570_mRNA_6.1  | -                     |
| GF0037885 | 0                      | 1                 | 0                  | Cysteine Histidine-rich C1 domain family protein (1)                | protein-disulfide reductase activity [GO:0047134 molecular_function] (1); oxidation-reduction process [GO:0005514 biological_process] (1)                                                                                                                                                                                                                                  | Zinc finger, RING/TFVE/PHD-type [IPR013083] (1); C1-like [IPR011424] (1)                                                                                                                                                                                                                                                                                                                                                      |                           | C_unihir_00570_mRNA_5.1  | -                     |
| GF0037884 | 0                      | 1                 | 0                  | Transcription regulation protein, putative (1)                      | protein binding [GO:0005515 molecular_function] (1)                                                                                                                                                                                                                                                                                                                        | F-box domain [IPR001810] (1)                                                                                                                                                                                                                                                                                                                                                                                                  |                           | C_unihir_00570_mRNA_11.1 | -                     |
| GF0037883 | 0                      | 1                 | 0                  | Hypothetical protein (1)                                            |                                                                                                                                                                                                                                                                                                                                                                            |                                                                                                                                                                                                                                                                                                                                                                                                                               |                           | C_unihir_00570_mRNA_1.1  | -                     |
| GF0037882 | 0                      | 1                 | 0                  | Hypothetical protein (1)                                            |                                                                                                                                                                                                                                                                                                                                                                            |                                                                                                                                                                                                                                                                                                                                                                                                                               |                           | C_unihir_00569_mRNA_8.1  | -                     |
| GF0037881 | 0                      | 1                 | 0                  | Hypothetical protein (1)                                            |                                                                                                                                                                                                                                                                                                                                                                            | Bifunctional inhibitor/plant lipid transfer protein-associated storage helical domain [IPR016140] (1)                                                                                                                                                                                                                                                                                                                         |                           | C_unihir_00569_mRNA_18.1 | -                     |
| GF0037880 | 0                      | 1                 | 0                  | Cytochrome P450 (1)                                                 | iron ion binding [GO:0005506 molecular_function] (1); heme binding [GO:0020037 molecular_function] (1); monooxygenase activity [GO:0004497 molecular_function] (1); oxidation-reduction process [GO:0005514 biological_process] (1); cytochrome activity, acting on paired donors, with incorporation or reduction of molecular oxygen [GO:0016765 molecular_function] (1) | Cytochrome P450 [IPR001128] (1); Cytochrome P450, B-class [IPR023297] (1); Cytochrome P450, conserved site [IPR017972] (1)                                                                                                                                                                                                                                                                                                    |                           | C_unihir_00568_mRNA_8.1  | -                     |
| GF0037879 | 0                      | 1                 | 0                  | Hypothetical protein (1)                                            | ADP binding [GO:0043531 molecular_function] (1)                                                                                                                                                                                                                                                                                                                            | NB-ARC [IPR002182] (1); P-loop containing nucleoside triphosphate hydrolase [IPR027417] (1)                                                                                                                                                                                                                                                                                                                                   |                           | C_unihir_00568_mRNA_6.1  | -                     |
| GF0037878 | 0                      | 1                 | 0                  | Hypothetical protein (1)                                            |                                                                                                                                                                                                                                                                                                                                                                            |                                                                                                                                                                                                                                                                                                                                                                                                                               |                           | C_unihir_00568_mRNA_5.1  | -                     |
| GF0037877 | 0                      | 1                 | 0                  | Hypothetical protein (1)                                            |                                                                                                                                                                                                                                                                                                                                                                            | Glycoside hydrolase superfamily [IPR017853] (1)                                                                                                                                                                                                                                                                                                                                                                               |                           | C_unihir_00568_mRNA_3.1  | -                     |
| GF0037876 | 0                      | 1                 | 0                  | Hypothetical protein (1)                                            |                                                                                                                                                                                                                                                                                                                                                                            | Myo-inositol-1-phosphate lyase, GADPH-like [IPR013021] (1)                                                                                                                                                                                                                                                                                                                                                                    |                           | C_unihir_00568_mRNA_25.1 | -                     |
| GF0037875 | 0                      | 1                 | 0                  | Truncated RB (1)                                                    | ADP binding [GO:0043531 molecular_function] (1)                                                                                                                                                                                                                                                                                                                            | NB-ARC [IPR002182] (1); P-loop containing nucleoside triphosphate hydrolase [IPR027417] (1)                                                                                                                                                                                                                                                                                                                                   |                           | C_unihir_00568_mRNA_24.1 | -                     |
| GF0037874 | 0                      | 1                 | 0                  | Hypothetical protein (1)                                            | nucleic acid binding [GO:0003676 molecular_function] (1); zinc ion binding [GO:0008270 molecular_function] (1)                                                                                                                                                                                                                                                             | Zinc finger, CCHC-type [IPR001878] (1)                                                                                                                                                                                                                                                                                                                                                                                        |                           | C_unihir_00568_mRNA_2.1  | -                     |
| GF0037873 | 0                      | 1                 | 0                  | Hypothetical protein (1)                                            |                                                                                                                                                                                                                                                                                                                                                                            |                                                                                                                                                                                                                                                                                                                                                                                                                               |                           | C_unihir_00568_mRNA_13.1 | -                     |
| GF0037872 | 0                      | 1                 | 0                  | Hypothetical protein (1)                                            |                                                                                                                                                                                                                                                                                                                                                                            |                                                                                                                                                                                                                                                                                                                                                                                                                               |                           | C_unihir_00568_mRNA_1.1  | -                     |
| GF0037871 | 0                      | 1                 | 0                  | Hypothetical protein (1)                                            |                                                                                                                                                                                                                                                                                                                                                                            |                                                                                                                                                                                                                                                                                                                                                                                                                               |                           | C_unihir_00567_mRNA_14.1 | -                     |
| GF0037870 | 0                      | 1                 | 0                  | Hypothetical protein (1)                                            |                                                                                                                                                                                                                                                                                                                                                                            |                                                                                                                                                                                                                                                                                                                                                                                                                               |                           | C_unihir_00567_mRNA_10.1 | -                     |
| GF0037869 | 0                      | 1                 | 0                  | Hypothetical protein (1)                                            | nucleic acid binding [GO:0003676 molecular_function] (1); zinc ion binding [GO:0008270 molecular_function] (1)                                                                                                                                                                                                                                                             | Zinc finger, CCHC-type [IPR001878] (1)                                                                                                                                                                                                                                                                                                                                                                                        |                           | C_unihir_00566_mRNA_4.1  | -                     |
| GF0037868 | 0                      | 1                 | 0                  | Hypothetical protein (1)                                            | protein dimerization activity [GO:0046983 molecular_function] (1); nucleic acid binding [GO:0003676 molecular_function] (1)                                                                                                                                                                                                                                                | Ribonuclease H-like domain [IPR012337] (1); HAT, C-terminal dimerization domain [IPR008900] (1)                                                                                                                                                                                                                                                                                                                               |                           | C_unihir_00566_mRNA_15.1 | -                     |
| GF0037867 | 0                      | 1                 | 0                  | Hypothetical protein (1)                                            |                                                                                                                                                                                                                                                                                                                                                                            |                                                                                                                                                                                                                                                                                                                                                                                                                               |                           | C_unihir_00566_mRNA_12.1 | -                     |
| GF0037866 | 0                      | 1                 | 0                  | Polysialotransferase, family GH28 (1)                               | carbohydrate metabolic process [GO:0005975 biological_process] (1); polysialotransferase activity [GO:0004650 molecular_function] (1)                                                                                                                                                                                                                                      | Pectin lyase fold/virulence factor [IPR010510] (1); Pectin lyase fold [IPR012334] (1); Glycoside hydrolase, family 28 [IPR000743] (1); Parallel beta-beta repeat [IPR006025] (1)                                                                                                                                                                                                                                              |                           | C_unihir_00565_mRNA_35.1 | -                     |
| GF0037865 | 0                      | 1                 | 0                  | Hypothetical protein (1)                                            |                                                                                                                                                                                                                                                                                                                                                                            |                                                                                                                                                                                                                                                                                                                                                                                                                               |                           | C_unihir_00565_mRNA_32.1 | -                     |
| GF0037864 | 0                      | 1                 | 0                  | Hypothetical protein (1)                                            |                                                                                                                                                                                                                                                                                                                                                                            |                                                                                                                                                                                                                                                                                                                                                                                                                               |                           | C_unihir_00565_mRNA_30.1 | -                     |
| GF0037863 | 0                      | 1                 | 0                  | Hypothetical protein (1)                                            |                                                                                                                                                                                                                                                                                                                                                                            |                                                                                                                                                                                                                                                                                                                                                                                                                               |                           | C_unihir_00565_mRNA_28.1 | -                     |
| GF0037862 | 0                      | 1                 | 0                  | Hypothetical protein (1)                                            |                                                                                                                                                                                                                                                                                                                                                                            |                                                                                                                                                                                                                                                                                                                                                                                                                               |                           | C_unihir_00565_mRNA_26.1 | -                     |
| GF0037861 | 0                      | 1                 | 0                  | Hypothetical protein (1)                                            |                                                                                                                                                                                                                                                                                                                                                                            |                                                                                                                                                                                                                                                                                                                                                                                                                               |                           | C_unihir_00565_mRNA_25.1 | -                     |
| GF0037860 | 0                      | 1                 | 0                  | Hypothetical protein (1)                                            |                                                                                                                                                                                                                                                                                                                                                                            |                                                                                                                                                                                                                                                                                                                                                                                                                               |                           | C_unihir_00565_mRNA_13.1 | -                     |
| GF0037859 | 0                      | 1                 | 0                  | Hypothetical protein (1)                                            |                                                                                                                                                                                                                                                                                                                                                                            |                                                                                                                                                                                                                                                                                                                                                                                                                               |                           | C_unihir_00565_mRNA_10.1 | -                     |
| GF0037858 | 0                      | 1                 | 0                  | Hypothetical protein (1)                                            |                                                                                                                                                                                                                                                                                                                                                                            |                                                                                                                                                                                                                                                                                                                                                                                                                               |                           | C_unihir_00564_mRNA_8.1  | -                     |
| GF0037857 | 0                      | 1                 | 0                  | Hypothetical protein (1)                                            |                                                                                                                                                                                                                                                                                                                                                                            |                                                                                                                                                                                                                                                                                                                                                                                                                               |                           | C_unihir_00564_mRNA_7.1  | -                     |
| GF0037856 | 0                      | 1                 | 0                  | Hypothetical protein (1)                                            |                                                                                                                                                                                                                                                                                                                                                                            | Domain of unknown function DUF4218 [IPR025452] (1)                                                                                                                                                                                                                                                                                                                                                                            |                           | C_unihir_00564_mRNA_6.1  | -                     |
| GF0037855 | 0                      | 1                 | 0                  | Hypothetical protein (1)                                            |                                                                                                                                                                                                                                                                                                                                                                            |                                                                                                                                                                                                                                                                                                                                                                                                                               |                           | C_unihir_00564_mRNA_23.1 | -                     |
| GF0037854 | 0                      | 1                 | 0                  | Hypothetical protein (1)                                            |                                                                                                                                                                                                                                                                                                                                                                            |                                                                                                                                                                                                                                                                                                                                                                                                                               |                           | C_unihir_00564_mRNA_2.1  | -                     |
| GF0037853 | 0                      | 1                 | 0                  | Hypothetical protein (1)                                            |                                                                                                                                                                                                                                                                                                                                                                            |                                                                                                                                                                                                                                                                                                                                                                                                                               |                           | C_unihir_00563_mRNA_9.1  | -                     |
| GF0037852 | 0                      | 1                 | 0                  | Hypothetical protein (1)                                            |                                                                                                                                                                                                                                                                                                                                                                            |                                                                                                                                                                                                                                                                                                                                                                                                                               |                           | C_unihir_00563_mRNA_22.1 | -                     |
| GF0037851 | 0                      | 1                 | 0                  | Hypothetical protein (1)                                            |                                                                                                                                                                                                                                                                                                                                                                            | Protein kinase-like domain [IPR011009] (1)                                                                                                                                                                                                                                                                                                                                                                                    |                           | C_unihir_00563_mRNA_2.1  | -                     |
| GF0037850 | 0                      | 1                 | 0                  | Hypothetical protein (1)                                            |                                                                                                                                                                                                                                                                                                                                                                            |                                                                                                                                                                                                                                                                                                                                                                                                                               |                           | C_unihir_00561_mRNA_17.1 | -                     |
| GF0037849 | 0                      | 1                 | 0                  | Hypothetical protein (1)                                            |                                                                                                                                                                                                                                                                                                                                                                            |                                                                                                                                                                                                                                                                                                                                                                                                                               |                           | C_unihir_00563_mRNA_12.1 | -                     |
| GF0037848 | 0                      | 1                 | 0                  | Hypothetical protein (1)                                            |                                                                                                                                                                                                                                                                                                                                                                            |                                                                                                                                                                                                                                                                                                                                                                                                                               |                           | C_unihir_00563_mRNA_10.1 | -                     |
| GF0037847 | 0                      | 1                 | 0                  | Hypothetical protein (1)                                            | phospholipid binding [GO:0005543 molecular_function] (1)                                                                                                                                                                                                                                                                                                                   | ENTH/VHS [IPR008422] (1); AP180 N-terminal helical (ANTH) domain [IPR011471] (1); ENTH domain [IPR013899] (1)                                                                                                                                                                                                                                                                                                                 |                           | C_unihir_00562_mRNA_24.1 | -                     |
| GF0037846 | 0                      | 1                 | 0                  | Oxidoreductase electron carrier (1)                                 | oxidation-reduction process [GO:0005514 biological_process] (1); oxidoreductase activity [GO:0001649 molecular_function] (1)                                                                                                                                                                                                                                               | FAD(NAD(P))-binding domain [IPR023753] (1)                                                                                                                                                                                                                                                                                                                                                                                    |                           | C_unihir_00562_mRNA_1.1  | -                     |
| GF0037845 | 0                      | 1                 | 0                  | Hypothetical protein (1)                                            |                                                                                                                                                                                                                                                                                                                                                                            |                                                                                                                                                                                                                                                                                                                                                                                                                               |                           | C_unihir_00561_mRNA_9.1  | -                     |
| GF0037844 | 0                      | 1                 | 0                  | Hypothetical protein (1)                                            |                                                                                                                                                                                                                                                                                                                                                                            |                                                                                                                                                                                                                                                                                                                                                                                                                               |                           | C_unihir_00561_mRNA_7.1  | -                     |
| GF0037843 | 0                      | 1                 | 0                  | Hypothetical protein (1)                                            |                                                                                                                                                                                                                                                                                                                                                                            |                                                                                                                                                                                                                                                                                                                                                                                                                               |                           | C_unihir_00561_mRNA_5.1  | -                     |
| GF0037842 | 0                      | 1                 | 0                  | Hypothetical protein (1)                                            |                                                                                                                                                                                                                                                                                                                                                                            |                                                                                                                                                                                                                                                                                                                                                                                                                               |                           | C_unihir_00561_mRNA_4.1  | -                     |
| GF0037841 | 0                      | 1                 | 0                  | Putative invertase inhibitor (1)                                    | enzymic inhibitor activity [GO:0004857 molecular_function] (1)                                                                                                                                                                                                                                                                                                             | Proteinase inhibitor domain [IPR006501] (1)                                                                                                                                                                                                                                                                                                                                                                                   |                           | C_unihir_00561_mRNA_3.1  | -                     |
| GF0037840 | 0                      | 1                 | 0                  | Hypothetical protein (1)                                            |                                                                                                                                                                                                                                                                                                                                                                            |                                                                                                                                                                                                                                                                                                                                                                                                                               |                           | C_unihir_00561_mRNA_2.1  | -                     |
| GF0037839 | 0                      | 1                 | 0                  | Hypothetical protein (1)                                            |                                                                                                                                                                                                                                                                                                                                                                            |                                                                                                                                                                                                                                                                                                                                                                                                                               |                           | C_unihir_00561_mRNA_1.1  | -                     |
| GF0037838 | 0                      | 1                 | 0                  | Transmembrane protein 45B (1)                                       | protein binding [GO:0005515 molecular_function] (1)                                                                                                                                                                                                                                                                                                                        | Protein of unknown function DUF1716 (TME445) [IPR006904] (1)                                                                                                                                                                                                                                                                                                                                                                  |                           | C_unihir_00560_mRNA_8.1  | -                     |
| GF0037837 | 0                      | 1                 | 0                  | Hypothetical protein (1)                                            | binding [GO:0005428 molecular_function] (1); phosphorylation [GO:0006110 biological_process] (1); nuclear-transcribed mRNA catabolic process, nonsense-mediated decay [GO:000184 biological_process] (1); protein serine/threonine kinase activity [GO:0004674 molecular_function] (1)                                                                                     | Tetrapeptide-like helical domain [IPR011990] (1); Peptide repeat [IPR028851] (1)                                                                                                                                                                                                                                                                                                                                              |                           | C_unihir_00560_mRNA_7.1  | -                     |
| GF0037836 | 0                      | 1                 | 0                  | Hypothetical protein (1)                                            |                                                                                                                                                                                                                                                                                                                                                                            | Armadillo-like helical [IPR01989] (1); Serine/threonine-protein kinase SH2/1 [IPR015591] (1); Armadillo-type fold [IPR016024] (1)                                                                                                                                                                                                                                                                                             |                           | C_unihir_00560_mRNA_4.1  | -                     |
| GF0037835 | 0                      | 1                 | 0                  | Hypothetical protein (1)                                            |                                                                                                                                                                                                                                                                                                                                                                            |                                                                                                                                                                                                                                                                                                                                                                                                                               |                           | C_unihir_00560_mRNA_32.1 | -                     |
| GF0037834 | 0                      | 1                 | 0                  | Transcription factor B3 (1)                                         | DNA binding [GO:0003677 molecular_function] (1)                                                                                                                                                                                                                                                                                                                            | DNA-binding protein/retardator domain [IPR015300] (1); B3 DNA binding domain [IPR003340] (1)                                                                                                                                                                                                                                                                                                                                  |                           | C_unihir_00560_mRNA_14.1 | -                     |
| GF0037833 | 0                      | 1                 | 0                  | Hypothetical protein (1)                                            |                                                                                                                                                                                                                                                                                                                                                                            | PGC domain [IPR026961] (1); Ankyrin repeat-containing domain [IPR020683] (1)                                                                                                                                                                                                                                                                                                                                                  |                           | C_unihir_00559_mRNA_6.1  | -                     |
| GF0037832 | 0                      | 1                 | 0                  | Hypothetical protein (1)                                            |                                                                                                                                                                                                                                                                                                                                                                            |                                                                                                                                                                                                                                                                                                                                                                                                                               |                           | C_unihir_00559_mRNA_12.1 | -                     |
| GF0037831 | 0                      | 1                 | 0                  | Hypothetical protein (1)                                            |                                                                                                                                                                                                                                                                                                                                                                            |                                                                                                                                                                                                                                                                                                                                                                                                                               |                           | C_unihir_00558_mRNA_8.1  | -                     |
| GF0037830 | 0                      | 1                 | 0                  | Hypothetical protein (1)                                            |                                                                                                                                                                                                                                                                                                                                                                            | Transposase, MuDR, plasmid [IPR004332] (1)                                                                                                                                                                                                                                                                                                                                                                                    |                           | C_unihir_00558_mRNA_7.1  | -                     |
| GF0037829 | 0                      | 1                 | 0                  | Hypothetical protein (1)                                            | proteolysis [GO:0006508 biological_process] (1); peptidase activity [GO:0008233 molecular_function] (1)                                                                                                                                                                                                                                                                    | Peptidase C13, legumin [IPR001096] (1)                                                                                                                                                                                                                                                                                                                                                                                        |                           | C_unihir_00558_mRNA_6.1  | -                     |
| GF0037828 | 0                      | 1                 | 0                  | Hypothetical protein (1)                                            |                                                                                                                                                                                                                                                                                                                                                                            |                                                                                                                                                                                                                                                                                                                                                                                                                               |                           | C_unihir_00558_mRNA_4.1  | -                     |
| GF0037827 | 0                      | 1                 | 0                  | Cytokinin riboside 5'-monophosphate phosphoribohydrolase (1)        |                                                                                                                                                                                                                                                                                                                                                                            |                                                                                                                                                                                                                                                                                                                                                                                                                               |                           | C_unihir_00558_mRNA_2.1  | -                     |
| GF0037826 | 0                      | 1                 | 0                  | Hypothetical protein (1)                                            |                                                                                                                                                                                                                                                                                                                                                                            |                                                                                                                                                                                                                                                                                                                                                                                                                               |                           | C_unihir_00558_mRNA_17.1 | -                     |
| GF0037825 | 0                      | 1                 | 0                  | Cytokinin riboside 5'-monophosphate phosphoribohydrolase (1)        |                                                                                                                                                                                                                                                                                                                                                                            | Cytokinin riboside 5'-monophosphate phosphoribohydrolase LOG [IPR005269] (1); LOG family [IPR031100] (1)                                                                                                                                                                                                                                                                                                                      |                           | C_unihir_00558_mRNA_16.1 | -                     |
| GF0037824 | 0                      | 1                 | 0                  | Hypothetical protein (1)                                            |                                                                                                                                                                                                                                                                                                                                                                            |                                                                                                                                                                                                                                                                                                                                                                                                                               |                           | C_unihir_00558_mRNA_15.1 | -                     |
| GF0037823 | 0                      | 1                 | 0                  | Hypothetical protein (1)                                            |                                                                                                                                                                                                                                                                                                                                                                            |                                                                                                                                                                                                                                                                                                                                                                                                                               |                           | C_unihir_00557_mRNA_8.1  | -                     |
| GF0037822 | 0                      | 1                 | 0                  | Hypothetical protein (1)                                            |                                                                                                                                                                                                                                                                                                                                                                            | Transposase-associated domain [IPR029480] (1)                                                                                                                                                                                                                                                                                                                                                                                 |                           | C_unihir_00557_mRNA_7.1  | -                     |

| ID       | Num. in C. crottensteini | Num. in C. auris | Num. in P. putidus | Note                                                     | GO                                                                                                                                                                                                                                                                                                                                              | InterPro                                                                                                                                                                                                                                                                                                                                                        | Members in C. crottensteini | Members in C. auris    | Members in P. putidus |
|----------|--------------------------|------------------|--------------------|----------------------------------------------------------|-------------------------------------------------------------------------------------------------------------------------------------------------------------------------------------------------------------------------------------------------------------------------------------------------------------------------------------------------|-----------------------------------------------------------------------------------------------------------------------------------------------------------------------------------------------------------------------------------------------------------------------------------------------------------------------------------------------------------------|-----------------------------|------------------------|-----------------------|
| GF003721 | 0                        | 1                | 0                  | Hypothetical protein (1)                                 |                                                                                                                                                                                                                                                                                                                                                 |                                                                                                                                                                                                                                                                                                                                                                 |                             | C_uni96_0057_mRNA_6.1  | -                     |
| GF003720 | 0                        | 1                | 0                  | Hypothetical protein (1)                                 |                                                                                                                                                                                                                                                                                                                                                 |                                                                                                                                                                                                                                                                                                                                                                 |                             | C_uni96_0057_mRNA_10.1 | -                     |
| GF003719 | 0                        | 1                | 0                  | zinc ion binding [GO:0008270 molecular_function] (1)     |                                                                                                                                                                                                                                                                                                                                                 | Zinc finger, SWIM-type [IPRO07527] (1); MULE transposase domain [IPRO18289] (1); Zinc finger, PAZ-type [IPRO06564] (1)                                                                                                                                                                                                                                          |                             | C_uni96_0057_mRNA_1.1  | -                     |
| GF003718 | 0                        | 1                | 0                  | Hypothetical protein (1)                                 |                                                                                                                                                                                                                                                                                                                                                 |                                                                                                                                                                                                                                                                                                                                                                 |                             | C_uni96_0056_mRNA_21.1 | -                     |
| GF003717 | 0                        | 1                | 0                  | Hypothetical protein (1)                                 |                                                                                                                                                                                                                                                                                                                                                 |                                                                                                                                                                                                                                                                                                                                                                 |                             | C_uni96_0056_mRNA_20.1 | -                     |
| GF003716 | 0                        | 1                | 0                  | Hypothetical protein (1)                                 |                                                                                                                                                                                                                                                                                                                                                 |                                                                                                                                                                                                                                                                                                                                                                 |                             | C_uni96_0056_mRNA_2.1  | -                     |
| GF003715 | 0                        | 1                | 0                  | Hypothetical protein (1)                                 | zinc ion binding [GO:0008270 molecular_function] (1); nucleic acid binding [GO:0003676 molecular_function] (1)                                                                                                                                                                                                                                  | Zinc finger, CCHC-type [IPRO01878] (1)                                                                                                                                                                                                                                                                                                                          |                             | C_uni96_0056_mRNA_17.1 | -                     |
| GF003714 | 0                        | 1                | 0                  | Hypothetical protein (1)                                 |                                                                                                                                                                                                                                                                                                                                                 | MULE transposase domain [IPRO18289] (1)                                                                                                                                                                                                                                                                                                                         |                             | C_uni96_0056_mRNA_11.1 | -                     |
| GF003713 | 0                        | 1                | 0                  | Hypothetical protein (1)                                 |                                                                                                                                                                                                                                                                                                                                                 | Domain of unknown function DUF4283 [IPRO25558] (1)                                                                                                                                                                                                                                                                                                              |                             | C_uni96_0055_mRNA_8.1  | -                     |
| GF003712 | 0                        | 1                | 0                  | Hypothetical protein (1)                                 |                                                                                                                                                                                                                                                                                                                                                 |                                                                                                                                                                                                                                                                                                                                                                 |                             | C_uni96_0055_mRNA_7.1  | -                     |
| GF003711 | 0                        | 1                | 0                  | Hypothetical protein (1)                                 |                                                                                                                                                                                                                                                                                                                                                 |                                                                                                                                                                                                                                                                                                                                                                 |                             | C_uni96_0055_mRNA_6.1  | -                     |
| GF003710 | 0                        | 1                | 0                  | rNA-directed DNA polymerase (Reverse transcriptase) (1)  |                                                                                                                                                                                                                                                                                                                                                 | Reverse transcriptase domain [IPRO00477] (1)                                                                                                                                                                                                                                                                                                                    |                             | C_uni96_0055_mRNA_3.1  | -                     |
| GF003709 | 0                        | 1                | 0                  | Hypothetical protein (1)                                 | nucleic acid binding [GO:0003676 molecular_function] (1); zinc ion binding [GO:0008270 molecular_function] (1)                                                                                                                                                                                                                                  | Domain of unknown function DUF4283 [IPRO25558] (1); Zinc finger, CCHC-type [IPRO01878] (1); Zinc knuckle CXC2C40C4C [IPRO25836] (1)                                                                                                                                                                                                                             |                             | C_uni96_0055_mRNA_2.1  | -                     |
| GF003708 | 0                        | 1                | 0                  | Hypothetical protein (1)                                 |                                                                                                                                                                                                                                                                                                                                                 |                                                                                                                                                                                                                                                                                                                                                                 |                             | C_uni96_0055_mRNA_11.1 | -                     |
| GF003707 | 0                        | 1                | 0                  | Hypothetical protein (1)                                 | protein dimerization activity [GO:0046983 molecular_function] (1); nucleic acid binding [GO:0003676 molecular_function] (1); DNA binding [GO:0003677 molecular_function] (1)                                                                                                                                                                    | Zinc finger, BED-type [IPRO03456] (1); Ribonuclease H-like domain [IPRO12337] (1); IAT, C-terminal dimerization domain [IPRO09061] (1)                                                                                                                                                                                                                          |                             | C_uni96_0055_mRNA_1.1  | -                     |
| GF003706 | 0                        | 1                | 0                  | Hypothetical protein (1)                                 |                                                                                                                                                                                                                                                                                                                                                 |                                                                                                                                                                                                                                                                                                                                                                 |                             | C_uni96_0054_mRNA_7.1  | -                     |
| GF003705 | 0                        | 1                | 0                  | Hypothetical protein (1)                                 |                                                                                                                                                                                                                                                                                                                                                 | Retroransposon gag domain [IPRO05162] (4)                                                                                                                                                                                                                                                                                                                       |                             | C_uni96_0054_mRNA_6.1  | -                     |
| GF003704 | 0                        | 1                | 0                  | Cytochrome P450 (1)                                      | iron ion binding [GO:0005506 molecular_function] (1); heme binding [GO:0020817 molecular_function] (1); oxidoreduction process [GO:0055114 biological_process] (1); oxidoreductase activity, acting on paired donors, with incorporation or reduction of molecular oxygen [GO:0016705 molecular_function] (1)                                   | Cytochrome P450, E-class, group 1 [IPRO02401] (1); Cytochrome P450 [IPRO01128] (1)                                                                                                                                                                                                                                                                              |                             | C_uni96_0054_mRNA_19.1 | -                     |
| GF003703 | 0                        | 1                | 0                  | Hypothetical protein (1)                                 | fatty acid biosynthetic process [GO:0006537 biological_process] (1); acetyl-CoA carboxylase activity [GO:0003989 molecular_function] (1); ATP binding [GO:0000524 molecular_function] (1); biotin carboxylase activity [GO:0004075 molecular_function] (1)                                                                                      | Single hybrid motif [IPRO11053] (1); Biotin lipoyl attachment [IPRO00089] (1); ATP-group fold, subdomain 2 [IPRO13816] (1); Biotin carboxylation domain [IPRO11764] (1); Acetyl-CoA carboxylase, central domain [IPRO13537] (1); Radimant single hybrid motif [IPRO11054] (1); Biotin-binding site [IPRO181] (1); Biotin carboxylase, C-terminal [IPRO5482] (1) |                             | C_uni96_0053_mRNA_20.1 | -                     |
| GF003702 | 0                        | 1                | 0                  | Hypothetical protein (1)                                 | oxidation-reduction process [GO:0055114 biological_process] (1); oxidoreductase activity [GO:0016491 molecular_function] (1); 2 iron, 2 sulfur cluster binding [GO:0051537 molecular_function] (1)                                                                                                                                              | Rieske [2Fe-2S] iron-sulphur domain [IPRO17941] (4)                                                                                                                                                                                                                                                                                                             |                             | C_uni96_0052_mRNA_20.1 | -                     |
| GF003701 | 0                        | 1                | 0                  | Hypothetical protein (1)                                 | Far-red impaired responsive family protein isoform 2 (1)                                                                                                                                                                                                                                                                                        | FHY3-FAR1 family [IPRO11052] (1); FAR1 DNA binding domain [IPRO04330] (1)                                                                                                                                                                                                                                                                                       |                             | C_uni96_0052_mRNA_2.1  | -                     |
| GF003799 | 0                        | 1                | 0                  | Hypothetical protein (1)                                 |                                                                                                                                                                                                                                                                                                                                                 |                                                                                                                                                                                                                                                                                                                                                                 |                             | C_uni96_0052_mRNA_16.1 | -                     |
| GF003798 | 0                        | 1                | 0                  | Hypothetical protein (1)                                 | metal ion binding [GO:0046872 molecular_function] (1); protein binding [GO:0005515 molecular_function] (1)                                                                                                                                                                                                                                      | WD40/YVTN repeat-like-containing domain [IPRO15943] (1); WD40-repeat-containing domain [IPRO17960] (1); Zinc finger, CCHC-type [IPRO00571] (1)                                                                                                                                                                                                                  |                             | C_uni96_0052_mRNA_14.1 | -                     |
| GF003797 | 0                        | 1                | 0                  | Hypothetical protein (1)                                 | phosphotransferase activity, alcohol group as acceptor [GO:0016773 molecular_function] (1)                                                                                                                                                                                                                                                      | Carbohydrate kinase PR4b [IPRO11611] (1); Carbohydrate kinase, PR4b conserved site [IPRO02173] (1); Ribokase-like [IPRO20955] (1)                                                                                                                                                                                                                               |                             | C_uni96_0052_mRNA_11.1 | -                     |
| GF003796 | 0                        | 1                | 0                  | Hypothetical protein (1)                                 | regulation of transcription, DNA-templated [GO:0006355 biological_process] (1)                                                                                                                                                                                                                                                                  | FHY3-FAR1 family [IPRO11052] (1); FAR1 DNA binding domain [IPRO04330] (1)                                                                                                                                                                                                                                                                                       |                             | C_uni96_0052_mRNA_1.1  | -                     |
| GF003795 | 0                        | 1                | 0                  | Hypothetical protein (1)                                 |                                                                                                                                                                                                                                                                                                                                                 |                                                                                                                                                                                                                                                                                                                                                                 |                             | C_uni96_0051_mRNA_4.1  | -                     |
| GF003794 | 0                        | 1                | 0                  | Hypothetical protein (1)                                 |                                                                                                                                                                                                                                                                                                                                                 |                                                                                                                                                                                                                                                                                                                                                                 |                             | C_uni96_0051_mRNA_24.1 | -                     |
| GF003793 | 0                        | 1                | 0                  | Hypothetical protein (1)                                 |                                                                                                                                                                                                                                                                                                                                                 | Protein kinase-like domain [IPRO11009] (1)                                                                                                                                                                                                                                                                                                                      |                             | C_uni96_0051_mRNA_12.1 | -                     |
| GF003792 | 0                        | 1                | 0                  | Hypothetical protein (1)                                 |                                                                                                                                                                                                                                                                                                                                                 |                                                                                                                                                                                                                                                                                                                                                                 |                             | C_uni96_0051_mRNA_10.1 | -                     |
| GF003791 | 0                        | 1                | 0                  | Hypothetical protein (1)                                 |                                                                                                                                                                                                                                                                                                                                                 | Protein of unknown function DUF594 [IPRO07658] (1); Domain of unknown function DUF4220 [IPRO25135] (1)                                                                                                                                                                                                                                                          |                             | C_uni96_0050_mRNA_3.1  | -                     |
| GF003790 | 0                        | 1                | 0                  | Hypothetical protein (1)                                 |                                                                                                                                                                                                                                                                                                                                                 |                                                                                                                                                                                                                                                                                                                                                                 |                             | C_uni96_0050_mRNA_2.1  | -                     |
| GF003789 | 0                        | 1                | 0                  | UPF481 protein (1)                                       |                                                                                                                                                                                                                                                                                                                                                 | Protein of unknown function DUF247, plant [IPRO04158] (1)                                                                                                                                                                                                                                                                                                       |                             | C_uni96_0050_mRNA_17.1 | -                     |
| GF003788 | 0                        | 1                | 0                  | Hypothetical protein (1)                                 |                                                                                                                                                                                                                                                                                                                                                 | Protein of unknown function DUF247, plant [IPRO04158] (1)                                                                                                                                                                                                                                                                                                       |                             | C_uni96_0050_mRNA_16.1 | -                     |
| GF003787 | 0                        | 1                | 0                  | Hypothetical protein (1)                                 |                                                                                                                                                                                                                                                                                                                                                 |                                                                                                                                                                                                                                                                                                                                                                 |                             | C_uni96_0048_mRNA_18.1 | -                     |
| GF003786 | 0                        | 1                | 0                  | Hypothetical protein (1)                                 | protein dimerization activity [GO:0046983 molecular_function] (1); nucleic acid binding [GO:0003676 molecular_function] (1)                                                                                                                                                                                                                     | IAT, C-terminal dimerization domain [IPRO09061] (1); Ribonuclease H-like domain [IPRO12337] (1)                                                                                                                                                                                                                                                                 |                             | C_uni96_0048_mRNA_13.1 | -                     |
| GF003785 | 0                        | 1                | 0                  | Hypothetical protein (1)                                 |                                                                                                                                                                                                                                                                                                                                                 |                                                                                                                                                                                                                                                                                                                                                                 |                             | C_uni96_0047_mRNA_4.1  | -                     |
| GF003784 | 0                        | 1                | 0                  | Hypothetical protein (1)                                 |                                                                                                                                                                                                                                                                                                                                                 |                                                                                                                                                                                                                                                                                                                                                                 |                             | C_uni96_0047_mRNA_2.1  | -                     |
| GF003783 | 0                        | 1                | 0                  | Hypothetical protein (1)                                 |                                                                                                                                                                                                                                                                                                                                                 |                                                                                                                                                                                                                                                                                                                                                                 |                             | C_uni96_0047_mRNA_1.1  | -                     |
| GF003782 | 0                        | 1                | 0                  | Hypothetical protein (1)                                 |                                                                                                                                                                                                                                                                                                                                                 |                                                                                                                                                                                                                                                                                                                                                                 |                             | C_uni96_0045_mRNA_20.1 | -                     |
| GF003781 | 0                        | 1                | 0                  | Hypothetical protein (1)                                 | response to auxin [GO:0009733 biological_process] (1)                                                                                                                                                                                                                                                                                           | Small auxin-up RNA [IPRO03676] (1)                                                                                                                                                                                                                                                                                                                              |                             | C_uni96_0045_mRNA_2.1  | -                     |
| GF003780 | 0                        | 1                | 0                  | Hypothetical protein (1)                                 |                                                                                                                                                                                                                                                                                                                                                 |                                                                                                                                                                                                                                                                                                                                                                 |                             | C_uni96_0045_mRNA_18.1 | -                     |
| GF003779 | 0                        | 1                | 0                  | Hypothetical protein (1)                                 |                                                                                                                                                                                                                                                                                                                                                 |                                                                                                                                                                                                                                                                                                                                                                 |                             | C_uni96_0044_mRNA_6.1  | -                     |
| GF003778 | 0                        | 1                | 0                  | Hypothetical protein (1)                                 |                                                                                                                                                                                                                                                                                                                                                 |                                                                                                                                                                                                                                                                                                                                                                 |                             | C_uni96_0044_mRNA_4.1  | -                     |
| GF003777 | 0                        | 1                | 0                  | SFBbeta protein (1)                                      | protein binding [GO:0005515 molecular_function] (1)                                                                                                                                                                                                                                                                                             | F-box associated interaction domain [IPRO17431] (1); F-box domain [IPRO1810] (1); F-box associated domain, type 1 [IPRO06527] (1)                                                                                                                                                                                                                               |                             | C_uni96_0044_mRNA_3.1  | -                     |
| GF003776 | 0                        | 1                | 0                  | Mutant protein of flavanone-3-ohydrolase (1)             |                                                                                                                                                                                                                                                                                                                                                 | Non-hem biotin-dependent N-terminal domain [IPRO20992] (1); biotin:beta N synthase-like [IPRO27443] (1)                                                                                                                                                                                                                                                         |                             | C_uni96_0044_mRNA_12.1 | -                     |
| GF003775 | 0                        | 1                | 0                  | Chalcone-flavanone isomerase family protein (1)          |                                                                                                                                                                                                                                                                                                                                                 |                                                                                                                                                                                                                                                                                                                                                                 |                             | C_uni96_0044_mRNA_11.1 | -                     |
| GF003774 | 0                        | 1                | 0                  | Hypothetical protein (1)                                 |                                                                                                                                                                                                                                                                                                                                                 |                                                                                                                                                                                                                                                                                                                                                                 |                             | C_uni96_0043_mRNA_8.1  | -                     |
| GF003773 | 0                        | 1                | 0                  | Hypothetical protein (1)                                 |                                                                                                                                                                                                                                                                                                                                                 |                                                                                                                                                                                                                                                                                                                                                                 |                             | C_uni96_0043_mRNA_5.1  | -                     |
| GF003772 | 0                        | 1                | 0                  | Cytokinin riboside 5'-monophosphate phosphohydrolase (1) |                                                                                                                                                                                                                                                                                                                                                 |                                                                                                                                                                                                                                                                                                                                                                 |                             | C_uni96_0043_mRNA_3.1  | -                     |
| GF003771 | 0                        | 1                | 0                  | Cytokinin riboside 5'-monophosphate phosphohydrolase (1) |                                                                                                                                                                                                                                                                                                                                                 | Reverse transcriptase, RNA-dependent DNA polymerase [IPRO13103] (1)                                                                                                                                                                                                                                                                                             |                             | C_uni96_0043_mRNA_2.1  | -                     |
| GF003770 | 0                        | 1                | 0                  | Hypothetical protein (1)                                 |                                                                                                                                                                                                                                                                                                                                                 |                                                                                                                                                                                                                                                                                                                                                                 |                             | C_uni96_0043_mRNA_18.1 | -                     |
| GF003769 | 0                        | 1                | 0                  | Hypothetical protein (1)                                 |                                                                                                                                                                                                                                                                                                                                                 |                                                                                                                                                                                                                                                                                                                                                                 |                             | C_uni96_0043_mRNA_17.1 | -                     |
| GF003768 | 0                        | 1                | 0                  | Hypothetical protein (1)                                 |                                                                                                                                                                                                                                                                                                                                                 |                                                                                                                                                                                                                                                                                                                                                                 |                             | C_uni96_0043_mRNA_16.1 | -                     |
| GF003767 | 0                        | 1                | 0                  | Hypothetical protein (1)                                 |                                                                                                                                                                                                                                                                                                                                                 |                                                                                                                                                                                                                                                                                                                                                                 |                             | C_uni96_0043_mRNA_14.1 | -                     |
| GF003766 | 0                        | 1                | 0                  | Hypothetical protein (1)                                 |                                                                                                                                                                                                                                                                                                                                                 |                                                                                                                                                                                                                                                                                                                                                                 |                             | C_uni96_0043_mRNA_13.1 | -                     |
| GF003765 | 0                        | 1                | 0                  | Cytokinin riboside 5'-monophosphate phosphohydrolase (1) |                                                                                                                                                                                                                                                                                                                                                 | LOG family [IPRO11100] (1)                                                                                                                                                                                                                                                                                                                                      |                             | C_uni96_0043_mRNA_10.1 | -                     |
| GF003764 | 0                        | 1                | 0                  | Hypothetical protein (1)                                 |                                                                                                                                                                                                                                                                                                                                                 |                                                                                                                                                                                                                                                                                                                                                                 |                             | C_uni96_0042_mRNA_11.1 | -                     |
| GF003763 | 0                        | 1                | 0                  | Hypothetical protein (1)                                 |                                                                                                                                                                                                                                                                                                                                                 |                                                                                                                                                                                                                                                                                                                                                                 |                             | C_uni96_0042_mRNA_1.1  | -                     |
| GF003762 | 0                        | 1                | 0                  | Hypothetical protein (1)                                 |                                                                                                                                                                                                                                                                                                                                                 |                                                                                                                                                                                                                                                                                                                                                                 |                             | C_uni96_0041_mRNA_3.1  | -                     |
| GF003761 | 0                        | 1                | 0                  | Hypothetical protein (1)                                 |                                                                                                                                                                                                                                                                                                                                                 |                                                                                                                                                                                                                                                                                                                                                                 |                             | C_uni96_0041_mRNA_11.1 | -                     |
| GF003760 | 0                        | 1                | 0                  | Hypothetical protein (1)                                 |                                                                                                                                                                                                                                                                                                                                                 |                                                                                                                                                                                                                                                                                                                                                                 |                             | C_uni96_0040_mRNA_9.1  | -                     |
| GF003759 | 0                        | 1                | 0                  | Hypothetical protein (1)                                 |                                                                                                                                                                                                                                                                                                                                                 |                                                                                                                                                                                                                                                                                                                                                                 |                             | C_uni96_0040_mRNA_4.1  | -                     |
| GF003758 | 0                        | 1                | 0                  | Hypothetical protein (1)                                 |                                                                                                                                                                                                                                                                                                                                                 |                                                                                                                                                                                                                                                                                                                                                                 |                             | C_uni96_0040_mRNA_1.1  | -                     |
| GF003757 | 0                        | 1                | 0                  | Hypothetical protein (1)                                 |                                                                                                                                                                                                                                                                                                                                                 |                                                                                                                                                                                                                                                                                                                                                                 |                             | C_uni96_0039_mRNA_8.1  | -                     |
| GF003756 | 0                        | 1                | 0                  | Hypothetical protein (1)                                 |                                                                                                                                                                                                                                                                                                                                                 |                                                                                                                                                                                                                                                                                                                                                                 |                             | C_uni96_0039_mRNA_7.1  | -                     |
| GF003755 | 0                        | 1                | 0                  | F-box protein interaction domain protein (1)             | transcription from RNA polymerase III promoter [GO:0006383 biological_process] (1); DNA-directed RNA polymerase activity [GO:0003899 molecular_function] (1); DNA binding [GO:0003677 molecular_function] (1); DNA-directed RNA polymerase III complex [GO:0000666 cellular_component] (1); protein binding [GO:0005515 molecular_function] (1) | F-box associated interaction domain [IPRO17431] (1); DNA-directed RNA polymerase III subunit RPB4 [IPRO07811] (1); F-box associated domain, type 1 [IPRO06527] (1); F-box domain [IPRO03110] (1)                                                                                                                                                                |                             | C_uni96_0039_mRNA_3.1  | -                     |
| GF003754 | 0                        | 1                | 0                  | Hypothetical protein (1)                                 | serine-type peptidase activity [GO:0008236 molecular_function] (1); proteolysis [GO:0006508 biological_process] (1); serine-type endopeptidase activity [GO:0004252 molecular_function] (1); serine-type exopeptidase activity [GO:0070008 molecular_function] (1)                                                                              | Alpha/Beta hydrolase fold [IPRO22958] (1); Peptidase S9A, prolyl oligopeptidase [IPRO02470] (1); Peptidase S9, serine active site [IPRO02471] (1); Peptidase S9A, N-terminal domain [IPRO23302] (1); Peptidase S9, prolyl oligopeptidase, catalytic domain [IPRO03375] (1)                                                                                      |                             | C_uni96_0039_mRNA_10.1 | -                     |
| GF003752 | 0                        | 1                | 0                  | Hypothetical protein (1)                                 |                                                                                                                                                                                                                                                                                                                                                 |                                                                                                                                                                                                                                                                                                                                                                 |                             | C_uni96_0039_mRNA_1.1  | -                     |
| GF003751 | 0                        | 1                | 0                  | Hypothetical protein (1)                                 |                                                                                                                                                                                                                                                                                                                                                 |                                                                                                                                                                                                                                                                                                                                                                 |                             | C_uni96_0038_mRNA_6.1  | -                     |
| GF003750 | 0                        | 1                | 0                  | Hypothetical protein (1)                                 |                                                                                                                                                                                                                                                                                                                                                 |                                                                                                                                                                                                                                                                                                                                                                 |                             | C_uni96_0038_mRNA_3.1  | -                     |
| GF003749 | 0                        | 1                | 0                  | Hypothetical protein (1)                                 |                                                                                                                                                                                                                                                                                                                                                 |                                                                                                                                                                                                                                                                                                                                                                 |                             | C_uni96_0038_mRNA_16.1 | -                     |
| GF003748 | 0                        | 1                | 0                  | Hypothetical protein (1)                                 |                                                                                                                                                                                                                                                                                                                                                 |                                                                                                                                                                                                                                                                                                                                                                 |                             | C_uni96_0038_mRNA_15.1 | -                     |
| GF003747 | 0                        | 1                | 0                  | Hypothetical protein (1)                                 |                                                                                                                                                                                                                                                                                                                                                 |                                                                                                                                                                                                                                                                                                                                                                 |                             | C_uni96_0038_mRNA_12.1 | -                     |
| GF003746 | 0                        | 1                | 0                  | Hypothetical protein (1)                                 |                                                                                                                                                                                                                                                                                                                                                 |                                                                                                                                                                                                                                                                                                                                                                 |                             | C_uni96_0038_mRNA_1.1  | -                     |
| GF003745 | 0                        | 1                | 0                  | Hypothetical protein (1)                                 |                                                                                                                                                                                                                                                                                                                                                 |                                                                                                                                                                                                                                                                                                                                                                 |                             | C_uni96_0037_mRNA_3.1  | -                     |

| ID       | Num. in <i>C. crottensteini</i> | Num. in <i>C. caudis</i> | Num. in <i>P. putida</i> | Note                                                                        | GO                                                                                                                                                                                                                                                                                                                                                                                                                                                                                                                                                                                                                                                                                                                | InterPro                                                                                                                                                                                                                                                                                                                                                                                                                                          | Members in <i>C. crottensteini</i> | Members in <i>C. caudis</i> | Members in <i>P. putida</i> |
|----------|---------------------------------|--------------------------|--------------------------|-----------------------------------------------------------------------------|-------------------------------------------------------------------------------------------------------------------------------------------------------------------------------------------------------------------------------------------------------------------------------------------------------------------------------------------------------------------------------------------------------------------------------------------------------------------------------------------------------------------------------------------------------------------------------------------------------------------------------------------------------------------------------------------------------------------|---------------------------------------------------------------------------------------------------------------------------------------------------------------------------------------------------------------------------------------------------------------------------------------------------------------------------------------------------------------------------------------------------------------------------------------------------|------------------------------------|-----------------------------|-----------------------------|
| GF003744 | 0                               | 1                        | 1                        | 0 Small subunit ribosomal protein S7c (1)                                   | ribosome [GO:0005540]<br>cellular_component (1); structural constituent of ribosome [GO:0003735]<br>molecular_function (1); intracellular [GO:0005622 cellular_component] (1); translation [GO:0006412 biological_process] (1)                                                                                                                                                                                                                                                                                                                                                                                                                                                                                    | Ribosomal protein S7c [IPR000554] (1)                                                                                                                                                                                                                                                                                                                                                                                                             | -                                  | C_uni0037_mRNA_12.1         | -                           |
| GF003743 | 0                               | 1                        | 1                        | 0 Hypothetical protein (1)                                                  | -                                                                                                                                                                                                                                                                                                                                                                                                                                                                                                                                                                                                                                                                                                                 | -                                                                                                                                                                                                                                                                                                                                                                                                                                                 | -                                  | C_uni0037_mRNA_1.1          | -                           |
| GF003742 | 0                               | 1                        | 1                        | 0 Hypothetical protein (1)                                                  | -                                                                                                                                                                                                                                                                                                                                                                                                                                                                                                                                                                                                                                                                                                                 | -                                                                                                                                                                                                                                                                                                                                                                                                                                                 | -                                  | C_uni0036_mRNA_9.1          | -                           |
| GF003741 | 0                               | 1                        | 1                        | 0 Hypothetical protein (1)                                                  | -                                                                                                                                                                                                                                                                                                                                                                                                                                                                                                                                                                                                                                                                                                                 | -                                                                                                                                                                                                                                                                                                                                                                                                                                                 | -                                  | C_uni0036_mRNA_8.1          | -                           |
| GF003740 | 0                               | 1                        | 1                        | 0 Hypothetical protein (1)                                                  | -                                                                                                                                                                                                                                                                                                                                                                                                                                                                                                                                                                                                                                                                                                                 | -                                                                                                                                                                                                                                                                                                                                                                                                                                                 | -                                  | C_uni0036_mRNA_7.1          | -                           |
| GF003739 | 0                               | 1                        | 1                        | 0 Ubiquitin system component Cue protein, putative (1)                      | -                                                                                                                                                                                                                                                                                                                                                                                                                                                                                                                                                                                                                                                                                                                 | -                                                                                                                                                                                                                                                                                                                                                                                                                                                 | -                                  | C_uni0036_mRNA_5.1          | -                           |
| GF003738 | 0                               | 1                        | 1                        | 0 Hypothetical protein (1)                                                  | -                                                                                                                                                                                                                                                                                                                                                                                                                                                                                                                                                                                                                                                                                                                 | -                                                                                                                                                                                                                                                                                                                                                                                                                                                 | -                                  | C_uni0036_mRNA_3.1          | -                           |
| GF003737 | 0                               | 1                        | 1                        | 0 Hypothetical protein (1)                                                  | -                                                                                                                                                                                                                                                                                                                                                                                                                                                                                                                                                                                                                                                                                                                 | -                                                                                                                                                                                                                                                                                                                                                                                                                                                 | -                                  | C_uni0036_mRNA_22.1         | -                           |
| GF003736 | 0                               | 1                        | 1                        | 0 Hypothetical protein (1)                                                  | DNA binding [GO:0003677]<br>molecular_function (1)                                                                                                                                                                                                                                                                                                                                                                                                                                                                                                                                                                                                                                                                | Zinc finger, BED-type [IPR036456] (1)                                                                                                                                                                                                                                                                                                                                                                                                             | -                                  | C_uni0036_mRNA_21.1         | -                           |
| GF003735 | 0                               | 1                        | 1                        | 0 Hypothetical protein (1)                                                  | -                                                                                                                                                                                                                                                                                                                                                                                                                                                                                                                                                                                                                                                                                                                 | -                                                                                                                                                                                                                                                                                                                                                                                                                                                 | -                                  | C_uni0036_mRNA_16.1         | -                           |
| GF003734 | 0                               | 1                        | 1                        | 0 Hypothetical protein (1)                                                  | nucleic acid binding [GO:0003676]<br>molecular_function (1)                                                                                                                                                                                                                                                                                                                                                                                                                                                                                                                                                                                                                                                       | Ribonuclease H-like domain [IPR012337] (1)                                                                                                                                                                                                                                                                                                                                                                                                        | -                                  | C_uni0036_mRNA_14.1         | -                           |
| GF003733 | 0                               | 1                        | 1                        | 0 Hypothetical protein (1)                                                  | -                                                                                                                                                                                                                                                                                                                                                                                                                                                                                                                                                                                                                                                                                                                 | -                                                                                                                                                                                                                                                                                                                                                                                                                                                 | -                                  | C_uni0036_mRNA_13.1         | -                           |
| GF003732 | 0                               | 1                        | 1                        | 0 Hypothetical protein (1)                                                  | -                                                                                                                                                                                                                                                                                                                                                                                                                                                                                                                                                                                                                                                                                                                 | -                                                                                                                                                                                                                                                                                                                                                                                                                                                 | -                                  | C_uni0036_mRNA_11.1         | -                           |
| GF003731 | 0                               | 1                        | 1                        | 0 Hypothetical protein (1)                                                  | -                                                                                                                                                                                                                                                                                                                                                                                                                                                                                                                                                                                                                                                                                                                 | -                                                                                                                                                                                                                                                                                                                                                                                                                                                 | -                                  | C_uni0036_mRNA_10.1         | -                           |
| GF003730 | 0                               | 1                        | 1                        | 0 Hypothetical protein (1)                                                  | -                                                                                                                                                                                                                                                                                                                                                                                                                                                                                                                                                                                                                                                                                                                 | -                                                                                                                                                                                                                                                                                                                                                                                                                                                 | -                                  | C_uni0035_mRNA_1.1          | -                           |
| GF003729 | 0                               | 1                        | 1                        | 0 Hypothetical protein (1)                                                  | aspartic-type endopeptidase activity [GO:0004190 molecular_function] (1); proteolysis [GO:0005508 biological_process] (1)                                                                                                                                                                                                                                                                                                                                                                                                                                                                                                                                                                                         | Aspartic peptidase, active site [IPR01869] (1); Aspartic peptidase domain [IPR02109] (1)                                                                                                                                                                                                                                                                                                                                                          | -                                  | C_uni0034_mRNA_14.1         | -                           |
| GF003728 | 0                               | 1                        | 1                        | 0 Diacylglycerol kinase (1)                                                 | protein kinase C-activating G-protein coupled receptor signaling pathway [GO:0007205 biological_process] (1); kinase activity [GO:0016501 molecular_function] (1); diacylglycerol kinase activity [GO:0004143 molecular_function] (1)                                                                                                                                                                                                                                                                                                                                                                                                                                                                             | Diacylglycerol kinase, accessory domain [IPR000756] (1); Diacylglycerol kinase, catalytic domain [IPR001206] (1); NAD kinase/diacylglycerol kinase-like domain [IPR016064] (1)                                                                                                                                                                                                                                                                    | -                                  | C_uni0033_mRNA_24.1         | -                           |
| GF003727 | 0                               | 1                        | 1                        | 0 Hypothetical protein (1)                                                  | -                                                                                                                                                                                                                                                                                                                                                                                                                                                                                                                                                                                                                                                                                                                 | -                                                                                                                                                                                                                                                                                                                                                                                                                                                 | -                                  | C_uni0033_mRNA_23.1         | -                           |
| GF003726 | 0                               | 1                        | 1                        | 0 Hypothetical protein (1)                                                  | -                                                                                                                                                                                                                                                                                                                                                                                                                                                                                                                                                                                                                                                                                                                 | -                                                                                                                                                                                                                                                                                                                                                                                                                                                 | -                                  | C_uni0033_mRNA_10.1         | -                           |
| GF003725 | 0                               | 1                        | 1                        | 0 Hypothetical protein (1)                                                  | -                                                                                                                                                                                                                                                                                                                                                                                                                                                                                                                                                                                                                                                                                                                 | -                                                                                                                                                                                                                                                                                                                                                                                                                                                 | -                                  | C_uni0032_mRNA_17.1         | -                           |
| GF003724 | 0                               | 1                        | 1                        | 0 Hypothetical protein (1)                                                  | -                                                                                                                                                                                                                                                                                                                                                                                                                                                                                                                                                                                                                                                                                                                 | -                                                                                                                                                                                                                                                                                                                                                                                                                                                 | -                                  | C_uni0032_mRNA_1.1          | -                           |
| GF003723 | 0                               | 1                        | 1                        | 0 Hypothetical protein (1)                                                  | -                                                                                                                                                                                                                                                                                                                                                                                                                                                                                                                                                                                                                                                                                                                 | -                                                                                                                                                                                                                                                                                                                                                                                                                                                 | -                                  | C_uni0031_mRNA_9.1          | -                           |
| GF003722 | 0                               | 1                        | 1                        | 0 Hypothetical protein (1)                                                  | -                                                                                                                                                                                                                                                                                                                                                                                                                                                                                                                                                                                                                                                                                                                 | -                                                                                                                                                                                                                                                                                                                                                                                                                                                 | -                                  | C_uni0031_mRNA_8.1          | -                           |
| GF003721 | 0                               | 1                        | 1                        | 0 Hypothetical protein (1)                                                  | -                                                                                                                                                                                                                                                                                                                                                                                                                                                                                                                                                                                                                                                                                                                 | -                                                                                                                                                                                                                                                                                                                                                                                                                                                 | -                                  | C_uni0031_mRNA_25.1         | -                           |
| GF003720 | 0                               | 1                        | 1                        | 0 Hypothetical protein (1)                                                  | -                                                                                                                                                                                                                                                                                                                                                                                                                                                                                                                                                                                                                                                                                                                 | -                                                                                                                                                                                                                                                                                                                                                                                                                                                 | -                                  | C_uni0031_mRNA_14.1         | -                           |
| GF003719 | 0                               | 1                        | 1                        | 0 Hypothetical protein (1)                                                  | -                                                                                                                                                                                                                                                                                                                                                                                                                                                                                                                                                                                                                                                                                                                 | -                                                                                                                                                                                                                                                                                                                                                                                                                                                 | -                                  | C_uni0031_mRNA_13.1         | -                           |
| GF003718 | 0                               | 1                        | 1                        | 0 Hypothetical protein (1)                                                  | -                                                                                                                                                                                                                                                                                                                                                                                                                                                                                                                                                                                                                                                                                                                 | -                                                                                                                                                                                                                                                                                                                                                                                                                                                 | -                                  | C_uni0031_mRNA_10.1         | -                           |
| GF003717 | 0                               | 1                        | 1                        | 0 Hypothetical protein (1)                                                  | -                                                                                                                                                                                                                                                                                                                                                                                                                                                                                                                                                                                                                                                                                                                 | -                                                                                                                                                                                                                                                                                                                                                                                                                                                 | -                                  | C_uni0030_mRNA_9.1          | -                           |
| GF003716 | 0                               | 1                        | 1                        | 0 Hypothetical protein (1)                                                  | -                                                                                                                                                                                                                                                                                                                                                                                                                                                                                                                                                                                                                                                                                                                 | -                                                                                                                                                                                                                                                                                                                                                                                                                                                 | -                                  | C_uni0030_mRNA_8.1          | -                           |
| GF003715 | 0                               | 1                        | 1                        | 0 DUF247 domain protein (1)                                                 | -                                                                                                                                                                                                                                                                                                                                                                                                                                                                                                                                                                                                                                                                                                                 | Protein of unknown function DUF247, plant [IPR004158] (1)                                                                                                                                                                                                                                                                                                                                                                                         | -                                  | C_uni0030_mRNA_7.1          | -                           |
| GF003714 | 0                               | 1                        | 1                        | 0 Hypothetical protein (1)                                                  | -                                                                                                                                                                                                                                                                                                                                                                                                                                                                                                                                                                                                                                                                                                                 | Protein of unknown function DUF247, plant [IPR004158] (1)                                                                                                                                                                                                                                                                                                                                                                                         | -                                  | C_uni0030_mRNA_6.1          | -                           |
| GF003713 | 0                               | 1                        | 1                        | 0 Hypothetical protein (1)                                                  | -                                                                                                                                                                                                                                                                                                                                                                                                                                                                                                                                                                                                                                                                                                                 | -                                                                                                                                                                                                                                                                                                                                                                                                                                                 | -                                  | C_uni0030_mRNA_5.1          | -                           |
| GF003712 | 0                               | 1                        | 1                        | 0 Hypothetical protein (1)                                                  | -                                                                                                                                                                                                                                                                                                                                                                                                                                                                                                                                                                                                                                                                                                                 | -                                                                                                                                                                                                                                                                                                                                                                                                                                                 | -                                  | C_uni0030_mRNA_11.1         | -                           |
| GF003711 | 0                               | 1                        | 1                        | 0 Hypothetical protein (1)                                                  | -                                                                                                                                                                                                                                                                                                                                                                                                                                                                                                                                                                                                                                                                                                                 | Domain of unknown function DUF4283 [IPR025588] (4)                                                                                                                                                                                                                                                                                                                                                                                                | -                                  | C_uni0030_mRNA_10.1         | -                           |
| GF003710 | 0                               | 1                        | 1                        | 0 Hypothetical protein (1)                                                  | -                                                                                                                                                                                                                                                                                                                                                                                                                                                                                                                                                                                                                                                                                                                 | -                                                                                                                                                                                                                                                                                                                                                                                                                                                 | -                                  | C_uni0030_mRNA_1.1          | -                           |
| GF003709 | 0                               | 1                        | 1                        | 0 Putative retroelement pol polyprotein (1)                                 | -                                                                                                                                                                                                                                                                                                                                                                                                                                                                                                                                                                                                                                                                                                                 | -                                                                                                                                                                                                                                                                                                                                                                                                                                                 | -                                  | C_uni0029_mRNA_9.1          | -                           |
| GF003708 | 0                               | 1                        | 1                        | 0 Class I glutamine amidotransferase-like superfamily protein isoform 2 (1) | -                                                                                                                                                                                                                                                                                                                                                                                                                                                                                                                                                                                                                                                                                                                 | DI-1 [IPR006287] (1); Class I glutamine amidotransferase-like [IPR029062] (1); DI-1-IPe [IPR028181] (1)                                                                                                                                                                                                                                                                                                                                           | -                                  | C_uni0029_mRNA_7.1          | -                           |
| GF003707 | 0                               | 1                        | 1                        | 0 Hypothetical protein (1)                                                  | -                                                                                                                                                                                                                                                                                                                                                                                                                                                                                                                                                                                                                                                                                                                 | -                                                                                                                                                                                                                                                                                                                                                                                                                                                 | -                                  | C_uni0029_mRNA_6.1          | -                           |
| GF003706 | 0                               | 1                        | 1                        | 0 Hypothetical protein (1)                                                  | -                                                                                                                                                                                                                                                                                                                                                                                                                                                                                                                                                                                                                                                                                                                 | -                                                                                                                                                                                                                                                                                                                                                                                                                                                 | -                                  | C_uni0029_mRNA_5.1          | -                           |
| GF003705 | 0                               | 1                        | 1                        | 0 LRR receptor-like kinase (1)                                              | protein binding [GO:0005515 molecular_function] (1)                                                                                                                                                                                                                                                                                                                                                                                                                                                                                                                                                                                                                                                               | Leucine-rich repeat-containing N-terminal, plant-type [IPR013210] (1); Leucine-rich repeat [IPR016111] (1); Leucine-rich repeat domain, I. domain-like [IPR02675] (1); Leucine-rich repeat, typical subtype [IPR003591] (1)<br>Retortransposon gag domain [IPR005162] (1)                                                                                                                                                                         | -                                  | C_uni0029_mRNA_3.1          | -                           |
| GF003704 | 0                               | 1                        | 1                        | 0 Hypothetical protein (1)                                                  | -                                                                                                                                                                                                                                                                                                                                                                                                                                                                                                                                                                                                                                                                                                                 | -                                                                                                                                                                                                                                                                                                                                                                                                                                                 | -                                  | C_uni0029_mRNA_25.1         | -                           |
| GF003703 | 0                               | 1                        | 1                        | 0 Hypothetical protein (1)                                                  | -                                                                                                                                                                                                                                                                                                                                                                                                                                                                                                                                                                                                                                                                                                                 | -                                                                                                                                                                                                                                                                                                                                                                                                                                                 | -                                  | C_uni0029_mRNA_22.1         | -                           |
| GF003702 | 0                               | 1                        | 1                        | 0 Hypothetical protein (1)                                                  | -                                                                                                                                                                                                                                                                                                                                                                                                                                                                                                                                                                                                                                                                                                                 | -                                                                                                                                                                                                                                                                                                                                                                                                                                                 | -                                  | C_uni0029_mRNA_19.1         | -                           |
| GF003701 | 0                               | 1                        | 1                        | 0 Hypothetical protein (1)                                                  | -                                                                                                                                                                                                                                                                                                                                                                                                                                                                                                                                                                                                                                                                                                                 | Reverse transcriptase, RNA-dependent DNA polymerase [IPR013103] (1); Class I glutamine amidotransferase-like [IPR029062] (1); DI-1-IPp [IPR002818] (1)                                                                                                                                                                                                                                                                                            | -                                  | C_uni0029_mRNA_18.1         | -                           |
| GF003700 | 0                               | 1                        | 1                        | 0 Hypothetical protein (1)                                                  | protein binding [GO:0005515 molecular_function] (1)                                                                                                                                                                                                                                                                                                                                                                                                                                                                                                                                                                                                                                                               | Reverse transcriptase, RNA-dependent DNA polymerase [IPR013103] (1); Leucine-rich repeat domain, I. domain-like [IPR02675] (1); Leucine-rich repeat [IPR016111] (1)                                                                                                                                                                                                                                                                               | -                                  | C_uni0029_mRNA_17.1         | -                           |
| GF003699 | 0                               | 1                        | 1                        | 0 Hypothetical protein (1)                                                  | -                                                                                                                                                                                                                                                                                                                                                                                                                                                                                                                                                                                                                                                                                                                 | Domain of unknown function DUF4283 [IPR025588] (1); Endonuclease/exonuclease/phosphatase [IPR005135] (4)                                                                                                                                                                                                                                                                                                                                          | -                                  | C_uni0029_mRNA_13.1         | -                           |
| GF003698 | 0                               | 1                        | 1                        | 0 Putative transcriptional regulator DI-1 (1)                               | -                                                                                                                                                                                                                                                                                                                                                                                                                                                                                                                                                                                                                                                                                                                 | DI-1-IPp [IPR002818] (1); Class I glutamine amidotransferase-like [IPR029062] (1)                                                                                                                                                                                                                                                                                                                                                                 | -                                  | C_uni0029_mRNA_10.1         | -                           |
| GF003697 | 0                               | 1                        | 1                        | 0 Cytochrome P450 83B1 (1)                                                  | heme binding [GO:0020037 molecular_function] (1); iron ion binding [GO:0005506 molecular_function] (1); oxidoreductase activity, acting on paired donors, with incorporation or reduction of molecular oxygen [GO:0016765 molecular_function] (1); oxidation-reduction process [GO:0005514 biological_process] (1)                                                                                                                                                                                                                                                                                                                                                                                                | Cytochrome P450, conserved site [IPR017972] (1); Cytochrome P450, E-class, group I [IPR005401] (1); DI-1-IPp [IPR002818] (1); Cytochrome P450 [IPR011281] (1); DI-1 [IPR006287] (1); Class I glutamine amidotransferase-like [IPR029062] (1)                                                                                                                                                                                                      | -                                  | C_uni0029_mRNA_1.1          | -                           |
| GF003696 | 0                               | 1                        | 1                        | 0 Serine/threonine-protein kinase PHS1 (1)                                  | regulation of DNA-templated transcription, elongation [GO:0022784 biological_process] (1); nucleus [GO:0005634 cellular_component] (1); DNA binding [GO:0003677 molecular_function] (1); regulation of transcription from RNA polymerase II promoter [GO:0006357 biological_process] (1); transcription, DNA-templated [GO:0006351 biological_process] (1); zinc ion binding [GO:0008270 molecular_function] (1)                                                                                                                                                                                                                                                                                                  | Transcription elongation factor S-III [IPR017903] (1); Transcription factor IIS, N-terminal [IPR017923] (1); Transcription elongation factor, TFIIIS-CK280, N-terminal sub-type [IPR003617] (1); Transcription elongation factor S-II, central domain [IPR003618] (1); Transcription elongation factor, TFIIIS-related [IPR016492] (1)                                                                                                            | -                                  | C_uni0028_mRNA_9.1          | -                           |
| GF003695 | 0                               | 1                        | 1                        | 0 Transcription elongation factor S-II (1)                                  | -                                                                                                                                                                                                                                                                                                                                                                                                                                                                                                                                                                                                                                                                                                                 | -                                                                                                                                                                                                                                                                                                                                                                                                                                                 | -                                  | C_uni0028_mRNA_3.1          | -                           |
| GF003694 | 0                               | 1                        | 1                        | 0 Hypothetical protein (1)                                                  | -                                                                                                                                                                                                                                                                                                                                                                                                                                                                                                                                                                                                                                                                                                                 | -                                                                                                                                                                                                                                                                                                                                                                                                                                                 | -                                  | C_uni0028_mRNA_20.1         | -                           |
| GF003693 | 0                               | 1                        | 1                        | 0 Hypothetical protein (1)                                                  | -                                                                                                                                                                                                                                                                                                                                                                                                                                                                                                                                                                                                                                                                                                                 | -                                                                                                                                                                                                                                                                                                                                                                                                                                                 | -                                  | C_uni0028_mRNA_17.1         | -                           |
| GF003692 | 0                               | 1                        | 1                        | 0 Hypothetical protein (1)                                                  | -                                                                                                                                                                                                                                                                                                                                                                                                                                                                                                                                                                                                                                                                                                                 | Retortransposon gag domain [IPR005162] (1)                                                                                                                                                                                                                                                                                                                                                                                                        | -                                  | C_uni0028_mRNA_15.1         | -                           |
| GF003691 | 0                               | 1                        | 1                        | 0 Hypothetical protein (1)                                                  | -                                                                                                                                                                                                                                                                                                                                                                                                                                                                                                                                                                                                                                                                                                                 | -                                                                                                                                                                                                                                                                                                                                                                                                                                                 | -                                  | C_uni0028_mRNA_14.1         | -                           |
| GF003690 | 0                               | 1                        | 1                        | 0 Hypothetical protein (1)                                                  | -                                                                                                                                                                                                                                                                                                                                                                                                                                                                                                                                                                                                                                                                                                                 | -                                                                                                                                                                                                                                                                                                                                                                                                                                                 | -                                  | C_uni0028_mRNA_1.1          | -                           |
| GF003689 | 0                               | 1                        | 1                        | 0 Pentatricopeptide repeat (PPR) superfamily protein (1)                    | protein binding [GO:0005515 molecular_function] (1)                                                                                                                                                                                                                                                                                                                                                                                                                                                                                                                                                                                                                                                               | Pentatricopeptide repeat [IPR02888] (1); Tetra-tricopeptide-like helical domain [IPR011990] (4)                                                                                                                                                                                                                                                                                                                                                   | -                                  | C_uni0027_mRNA_9.1          | -                           |
| GF003688 | 0                               | 1                        | 1                        | 0 Retortransposon gag protein (1)                                           | -                                                                                                                                                                                                                                                                                                                                                                                                                                                                                                                                                                                                                                                                                                                 | Reverse transcriptase, RNA-dependent DNA polymerase [IPR013103] (1); Threonine-like fold [IPR012356] (1); Glutathione S-transferase, C-terminal [IPR004046] (1); Glutathione S-transferase, N-terminal [IPR004045] (1); Glutathione S-transferase, C-terminal-like [IPR010987] (4)                                                                                                                                                                | -                                  | C_uni0027_mRNA_20.1         | -                           |
| GF003687 | 0                               | 1                        | 1                        | 0 Pol polyprotein (1)                                                       | -                                                                                                                                                                                                                                                                                                                                                                                                                                                                                                                                                                                                                                                                                                                 | -                                                                                                                                                                                                                                                                                                                                                                                                                                                 | -                                  | C_uni0027_mRNA_27.1         | -                           |
| GF003686 | 0                               | 1                        | 1                        | 0 Phi class glutathione S-transferase (1)                                   | protein binding [GO:0005515 molecular_function] (1)                                                                                                                                                                                                                                                                                                                                                                                                                                                                                                                                                                                                                                                               | -                                                                                                                                                                                                                                                                                                                                                                                                                                                 | -                                  | C_uni0027_mRNA_20.1         | -                           |
| GF003685 | 0                               | 1                        | 1                        | 0 Tetacycline transporter, putative (1)                                     | integral component of membrane [GO:0016021 cellular_component] (1); transmembrane transport [GO:0055085 biological_process] (1)                                                                                                                                                                                                                                                                                                                                                                                                                                                                                                                                                                                   | Major facilitator superfamily [IPR017101] (1); Major facilitator superfamily domain [IPR020846] (4)                                                                                                                                                                                                                                                                                                                                               | -                                  | C_uni0027_mRNA_15.1         | -                           |
| GF003684 | 0                               | 1                        | 1                        | 0 Hypothetical protein (1)                                                  | -                                                                                                                                                                                                                                                                                                                                                                                                                                                                                                                                                                                                                                                                                                                 | -                                                                                                                                                                                                                                                                                                                                                                                                                                                 | -                                  | C_uni0027_mRNA_14.1         | -                           |
| GF003683 | 0                               | 1                        | 1                        | 0 Hypothetical protein (1)                                                  | -                                                                                                                                                                                                                                                                                                                                                                                                                                                                                                                                                                                                                                                                                                                 | -                                                                                                                                                                                                                                                                                                                                                                                                                                                 | -                                  | C_uni0026_mRNA_3.1          | -                           |
| GF003682 | 0                               | 1                        | 1                        | 0 Rab8 RABF-family small GTPase (1)                                         | GTPase activity [GO:0003924 molecular_function] (1); ribosome [GO:0005540 cellular_component] (1); protein transport [GO:0015031 biological_process] (1); small GTPase-mediated signal transduction [GO:0007264 biological_process] (1); nucleocytoplasmic transport [GO:0006913 biological_process] (1); membrane [GO:0016020 cellular_component] (1); signal transduction [GO:0007165 biological_process] (1); structural constituent of ribosome [GO:0003735 molecular_function] (1); GTP binding [GO:0005524 molecular_function] (1); intracellular protein transport [GO:0000086 biological_process] (1); translation [GO:0006412 biological_process] (1); intracellular [GO:0005622 cellular_component] (1) | Small GTP-binding protein domain [IPR002325] (1); Small GTPase superfamily, Rho type [IPR003578] (1); Ribosomal protein S8 [IPR000630] (1); P-loop containing nucleoside triphosphate hydrolase [IPR027417] (1); Small GTPase superfamily [IPR001860] (1); Ras GTPase [IPR002041] (1); Small GTPase superfamily, ARF type [IPR024156] (1); Small GTPase superfamily, Rab-type [IPR003579] (1); Small GTPase superfamily, Ras type [IPR020849] (1) | -                                  | C_uni0025_mRNA_9.1          | -                           |
| GF003681 | 0                               | 1                        | 1                        | 0 Putative ubiquitin-conjugating enzyme family (1)                          | -                                                                                                                                                                                                                                                                                                                                                                                                                                                                                                                                                                                                                                                                                                                 | Ubiquitin-conjugating enzyme E2 [IPR000608] (1); Ubiquitin-conjugating enzyme RWD-like [IPR016135] (1)                                                                                                                                                                                                                                                                                                                                            | -                                  | C_uni0025_mRNA_26.1         | -                           |
| GF003680 | 0                               | 1                        | 1                        | 0 UDP-glucuronic acid decarboxylase 3 (1)                                   | -                                                                                                                                                                                                                                                                                                                                                                                                                                                                                                                                                                                                                                                                                                                 | NAD(P)-binding domain [IPR016040] (1)                                                                                                                                                                                                                                                                                                                                                                                                             | -                                  | C_uni0025_mRNA_23.1         | -                           |
| GF003679 | 0                               | 1                        | 1                        | 0 Hypothetical protein (1)                                                  | -                                                                                                                                                                                                                                                                                                                                                                                                                                                                                                                                                                                                                                                                                                                 | -                                                                                                                                                                                                                                                                                                                                                                                                                                                 | -                                  | C_uni0025_mRNA_18.1         | -                           |



| ID        | Num. in <i>C. crottenstei</i> | Num. in <i>C. caudis</i> | Num. in <i>P. putida</i> | Note                                                                          | GO                                                                                                                                                                                                                                                                                                                                                                             | InterPro                                                                                                                                                                                                                                                                                                                                                                                          | Members in <i>C. crottenstei</i> | Members in <i>C. caudis</i> | Members in <i>P. putida</i> |
|-----------|-------------------------------|--------------------------|--------------------------|-------------------------------------------------------------------------------|--------------------------------------------------------------------------------------------------------------------------------------------------------------------------------------------------------------------------------------------------------------------------------------------------------------------------------------------------------------------------------|---------------------------------------------------------------------------------------------------------------------------------------------------------------------------------------------------------------------------------------------------------------------------------------------------------------------------------------------------------------------------------------------------|----------------------------------|-----------------------------|-----------------------------|
| GF0037678 | 0                             | 1                        | 0                        | Hypothetical protein (1)                                                      | protein dimerization activity [GO:0046983 molecular_function] (1); nucleic acid binding [GO:0003676 molecular_function] (1)                                                                                                                                                                                                                                                    | HAT, C-terminal dimerization domain [IPR008906] (1); Ribonuclease H-like domain [IPR02337] (1)                                                                                                                                                                                                                                                                                                    | -                                | C_ushii_00524_mRNA_5.1      | -                           |
| GF0037677 | 0                             | 1                        | 0                        | Hypothetical protein (1)                                                      | -                                                                                                                                                                                                                                                                                                                                                                              | -                                                                                                                                                                                                                                                                                                                                                                                                 | -                                | C_ushii_00524_mRNA_20.1     | -                           |
| GF0037676 | 0                             | 1                        | 0                        | Hypothetical protein (1)                                                      | -                                                                                                                                                                                                                                                                                                                                                                              | -                                                                                                                                                                                                                                                                                                                                                                                                 | -                                | C_ushii_00524_mRNA_2.1      | -                           |
| GF0037675 | 0                             | 1                        | 0                        | Hypothetical protein (1)                                                      | -                                                                                                                                                                                                                                                                                                                                                                              | -                                                                                                                                                                                                                                                                                                                                                                                                 | -                                | C_ushii_00524_mRNA_19.1     | -                           |
| GF0037674 | 0                             | 1                        | 0                        | Hypothetical protein (1)                                                      | -                                                                                                                                                                                                                                                                                                                                                                              | -                                                                                                                                                                                                                                                                                                                                                                                                 | -                                | C_ushii_00524_mRNA_17.1     | -                           |
| GF0037673 | 0                             | 1                        | 0                        | ERK and Nbs-ARC domain disease resistance protein (1)                         | magnesium ion binding [GO:0000287 molecular_function] (1); tyrosine activity [GO:0016249 molecular_function] (1); tyrosine synthase activity [GO:0010333 molecular_function] (1); metabolic process [GO:0008152 biological_process] (1)                                                                                                                                        | Leucine-rich repeat domain, L domain-like [IPR02675] (1)<br>Isoprenoid synthase domain [IPR008949] (1); Tyrosine synthase, N-terminal domain [IPR001906] (1); Tyrosine synthase, metal-binding domain [IPR005630] (1); Toponoid cyclase-protein prenyltransferase alpha-alpha toroid [IPR008930] (1)                                                                                              | -                                | C_ushii_00524_mRNA_11.1     | -                           |
| GF0037672 | 0                             | 1                        | 0                        | Isoprene synthase (1)                                                         | -                                                                                                                                                                                                                                                                                                                                                                              | -                                                                                                                                                                                                                                                                                                                                                                                                 | -                                | C_ushii_00523_mRNA_9.1      | -                           |
| GF0037671 | 0                             | 1                        | 0                        | Hypothetical protein (1)                                                      | -                                                                                                                                                                                                                                                                                                                                                                              | -                                                                                                                                                                                                                                                                                                                                                                                                 | -                                | C_ushii_00523_mRNA_6.1      | -                           |
| GF0037670 | 0                             | 1                        | 0                        | Hypothetical protein (1)                                                      | -                                                                                                                                                                                                                                                                                                                                                                              | -                                                                                                                                                                                                                                                                                                                                                                                                 | -                                | C_ushii_00523_mRNA_20.1     | -                           |
| GF0037669 | 0                             | 1                        | 0                        | Hypothetical protein (1)                                                      | -                                                                                                                                                                                                                                                                                                                                                                              | -                                                                                                                                                                                                                                                                                                                                                                                                 | -                                | C_ushii_00522_mRNA_5.1      | -                           |
| GF0037668 | 0                             | 1                        | 0                        | Hypothetical protein (1)                                                      | -                                                                                                                                                                                                                                                                                                                                                                              | -                                                                                                                                                                                                                                                                                                                                                                                                 | -                                | C_ushii_00522_mRNA_3.1      | -                           |
| GF0037667 | 0                             | 1                        | 0                        | Hypothetical protein (1)                                                      | -                                                                                                                                                                                                                                                                                                                                                                              | -                                                                                                                                                                                                                                                                                                                                                                                                 | -                                | C_ushii_00522_mRNA_2.1      | -                           |
| GF0037666 | 0                             | 1                        | 0                        | Polymethylol transferase, Ribonuclease H fold (1)                             | Reverse transcriptase zinc-binding domain [IPR026960] (1)                                                                                                                                                                                                                                                                                                                      | Domain of unknown function DUF4283 [IPR025588] (1)<br>Reverse transcriptase zinc-binding domain [IPR026960] (1)                                                                                                                                                                                                                                                                                   | -                                | C_ushii_00522_mRNA_11.1     | -                           |
| GF0037665 | 0                             | 1                        | 0                        | Hypothetical protein (1)                                                      | catalytic activity [GO:0003824 molecular_function] (1); protein dephosphorylation [GO:0006470 biological_process] (1); protein serine/threonine phosphatase activity [GO:0004722 molecular_function] (1)                                                                                                                                                                       | PPM-type phosphatase domain [IPR001932] (1); Protein phosphatase 2C family [IPR015655] (1)                                                                                                                                                                                                                                                                                                        | -                                | C_ushii_00521_mRNA_1.1      | -                           |
| GF0037664 | 0                             | 1                        | 0                        | Protein TONSOKU (1)                                                           | protein binding [GO:0005515 molecular_function] (1)                                                                                                                                                                                                                                                                                                                            | Leucine-rich repeat domain, L domain-like [IPR02675] (1); Mo25-like [IPR013878] (1); Tetranucleotide repeat [IPR019734] (1); Tetranucleotide repeat-containing domain [IPR013026] (1); Anomalous-like helical [IPR011989] (1); Leucine-rich repeat, ribonuclease inhibitor subtype [IPR005590] (1); Tetranucleotide repeat 1 [IPR001440] (1); Tetranucleotide-like helical domain [IPR011990] (1) | -                                | C_ushii_00521_mRNA_6.1      | -                           |
| GF0037663 | 0                             | 1                        | 0                        | Hypothetical protein (1)                                                      | -                                                                                                                                                                                                                                                                                                                                                                              | -                                                                                                                                                                                                                                                                                                                                                                                                 | -                                | C_ushii_00521_mRNA_3.1      | -                           |
| GF0037662 | 0                             | 1                        | 0                        | Hypothetical protein (1)                                                      | -                                                                                                                                                                                                                                                                                                                                                                              | -                                                                                                                                                                                                                                                                                                                                                                                                 | -                                | C_ushii_00521_mRNA_18.1     | -                           |
| GF0037661 | 0                             | 1                        | 0                        | Hypothetical protein (1)                                                      | -                                                                                                                                                                                                                                                                                                                                                                              | -                                                                                                                                                                                                                                                                                                                                                                                                 | -                                | C_ushii_00521_mRNA_16.1     | -                           |
| GF0037660 | 0                             | 1                        | 0                        | Cytochrome P450 76C2 (1)                                                      | oxidation-reduction process [GO:0055114 biological_process] (1); oxidoreductase activity, acting on paired donors, with incorporation or reduction of molecular oxygen [GO:0010765 molecular_function] (1); heme binding [GO:0020937 molecular_function] (1); zinc ion binding [GO:0005506 molecular_function] (1)                                                             | Cytochrome P450, E-class, group I [IPR002401] (1); Cytochrome P450, conserved site [IPR017972] (1); Cytochrome P450 [IPR001128] (1)                                                                                                                                                                                                                                                               | -                                | C_ushii_00521_mRNA_1.1      | -                           |
| GF0037659 | 0                             | 1                        | 0                        | Hypothetical protein (1)                                                      | -                                                                                                                                                                                                                                                                                                                                                                              | -                                                                                                                                                                                                                                                                                                                                                                                                 | -                                | C_ushii_00520_mRNA_6.1      | -                           |
| GF0037658 | 0                             | 1                        | 0                        | Hypothetical protein (1)                                                      | -                                                                                                                                                                                                                                                                                                                                                                              | -                                                                                                                                                                                                                                                                                                                                                                                                 | -                                | C_ushii_00520_mRNA_4.1      | -                           |
| GF0037657 | 0                             | 1                        | 0                        | Hypothetical protein (1)                                                      | -                                                                                                                                                                                                                                                                                                                                                                              | -                                                                                                                                                                                                                                                                                                                                                                                                 | -                                | C_ushii_00520_mRNA_3.1      | -                           |
| GF0037656 | 0                             | 1                        | 0                        | Hypothetical protein (1)                                                      | -                                                                                                                                                                                                                                                                                                                                                                              | -                                                                                                                                                                                                                                                                                                                                                                                                 | -                                | C_ushii_00520_mRNA_20.1     | -                           |
| GF0037655 | 0                             | 1                        | 0                        | Hypothetical protein (1)                                                      | -                                                                                                                                                                                                                                                                                                                                                                              | -                                                                                                                                                                                                                                                                                                                                                                                                 | -                                | C_ushii_00520_mRNA_19.1     | -                           |
| GF0037654 | 0                             | 1                        | 0                        | Hypothetical protein (1)                                                      | protein domain specific binding [GO:0019904 molecular_function] (1); nucleic acid binding [GO:0003676 molecular_function] (1); DNA integration [GO:0001074 biological_process] (1)                                                                                                                                                                                             | 14-3-3 protein [IPR003086] (1); 14-3-3 domain [IPR023495] (1)<br>Integrin, catalytic core [IPR001584] (1); Ribonuclease H-like domain [IPR012337] (1)                                                                                                                                                                                                                                             | -                                | C_ushii_00520_mRNA_18.1     | -                           |
| GF0037653 | 0                             | 1                        | 0                        | Hypothetical protein (1)                                                      | aspartic-type endopeptidase activity [GO:0004190 molecular_function] (1); proteolysis [GO:0006508 biological_process] (1)                                                                                                                                                                                                                                                      | Peptidase A2A, retrovirus, catalytic [IPR001995] (1); Retroprospins [IPR019061] (1); Aspartic peptidase domain [IPR021109] (1)                                                                                                                                                                                                                                                                    | -                                | C_ushii_00520_mRNA_14.1     | -                           |
| GF0037652 | 0                             | 1                        | 0                        | Hypothetical protein (1)                                                      | -                                                                                                                                                                                                                                                                                                                                                                              | -                                                                                                                                                                                                                                                                                                                                                                                                 | -                                | C_ushii_00520_mRNA_10.1     | -                           |
| GF0037651 | 0                             | 1                        | 0                        | Hypothetical protein (1)                                                      | -                                                                                                                                                                                                                                                                                                                                                                              | -                                                                                                                                                                                                                                                                                                                                                                                                 | -                                | C_ushii_00519_mRNA_7.1      | -                           |
| GF0037650 | 0                             | 1                        | 0                        | Puative retrotransposon pol polyprotein (1)                                   | -                                                                                                                                                                                                                                                                                                                                                                              | -                                                                                                                                                                                                                                                                                                                                                                                                 | -                                | C_ushii_00519_mRNA_3.1      | -                           |
| GF0037649 | 0                             | 1                        | 0                        | Probable ribosome biogenesis protein (1)                                      | -                                                                                                                                                                                                                                                                                                                                                                              | -                                                                                                                                                                                                                                                                                                                                                                                                 | -                                | C_ushii_00519_mRNA_16.1     | -                           |
| GF0037648 | 0                             | 1                        | 0                        | Hypothetical protein (1)                                                      | -                                                                                                                                                                                                                                                                                                                                                                              | -                                                                                                                                                                                                                                                                                                                                                                                                 | -                                | C_ushii_00519_mRNA_12.1     | -                           |
| GF0037647 | 0                             | 1                        | 0                        | Nitrate transporter 1.1 (1)                                                   | membrane [GO:0016020 cellular_component] (1); transport [GO:0006810 biological_process] (1); transporter activity [GO:0005215 molecular_function] (1)                                                                                                                                                                                                                          | Proton-dependent oligopeptide transporter family [IPR001091] (1); Major facilitator superfamily domain [IPR020846] (1)                                                                                                                                                                                                                                                                            | -                                | C_ushii_00518_mRNA_4.1      | -                           |
| GF0037646 | 0                             | 1                        | 0                        | Major facilitator superfamily protein isoform 2 (1)                           | transporter activity [GO:0005215 molecular_function] (1); membrane [GO:0016020 cellular_component] (1); transport [GO:0006810 biological_process] (1)                                                                                                                                                                                                                          | Proton-dependent oligopeptide transporter family [IPR001091] (1); Major facilitator superfamily domain [IPR020846] (1)                                                                                                                                                                                                                                                                            | -                                | C_ushii_00518_mRNA_3.1      | -                           |
| GF0037645 | 0                             | 1                        | 0                        | Hypothetical protein (1)                                                      | -                                                                                                                                                                                                                                                                                                                                                                              | -                                                                                                                                                                                                                                                                                                                                                                                                 | -                                | C_ushii_00518_mRNA_11.1     | -                           |
| GF0037644 | 0                             | 1                        | 0                        | Hypothetical protein (1)                                                      | -                                                                                                                                                                                                                                                                                                                                                                              | -                                                                                                                                                                                                                                                                                                                                                                                                 | -                                | C_ushii_00517_mRNA_6.1      | -                           |
| GF0037643 | 0                             | 1                        | 0                        | Hypothetical protein (1)                                                      | biosynthetic process [GO:0009058 biological_process] (1); nucleosyltransferase activity [GO:0016779 molecular_function] (1)                                                                                                                                                                                                                                                    | Domain of unknown function DUF676, ligase-like [IPR007751] (1)<br>Nucleosyl transferase domain [IPR008353] (1); Trimeric LpxA-like [IPR011048] (1); Nucleotide-diphosphate sugar transferase [IPR029044] (1)                                                                                                                                                                                      | -                                | C_ushii_00517_mRNA_3.1      | -                           |
| GF0037642 | 0                             | 1                        | 0                        | Disease resistance protein (1)                                                | -                                                                                                                                                                                                                                                                                                                                                                              | -                                                                                                                                                                                                                                                                                                                                                                                                 | -                                | C_ushii_00517_mRNA_18.1     | -                           |
| GF0037641 | 0                             | 1                        | 0                        | Hypothetical protein (1)                                                      | -                                                                                                                                                                                                                                                                                                                                                                              | -                                                                                                                                                                                                                                                                                                                                                                                                 | -                                | C_ushii_00517_mRNA_17.1     | -                           |
| GF0037640 | 0                             | 1                        | 0                        | Hypothetical protein (1)                                                      | -                                                                                                                                                                                                                                                                                                                                                                              | -                                                                                                                                                                                                                                                                                                                                                                                                 | -                                | C_ushii_00517_mRNA_15.1     | -                           |
| GF0037639 | 0                             | 1                        | 0                        | DUF241 domain protein (1)                                                     | -                                                                                                                                                                                                                                                                                                                                                                              | -                                                                                                                                                                                                                                                                                                                                                                                                 | -                                | C_ushii_00517_mRNA_13.1     | -                           |
| GF0037638 | 0                             | 1                        | 0                        | Hypothetical protein (1)                                                      | -                                                                                                                                                                                                                                                                                                                                                                              | -                                                                                                                                                                                                                                                                                                                                                                                                 | -                                | C_ushii_00516_mRNA_9.1      | -                           |
| GF0037637 | 0                             | 1                        | 0                        | Hypothetical protein (1)                                                      | -                                                                                                                                                                                                                                                                                                                                                                              | -                                                                                                                                                                                                                                                                                                                                                                                                 | -                                | C_ushii_00515_mRNA_6.1      | -                           |
| GF0037636 | 0                             | 1                        | 0                        | Hypothetical protein (1)                                                      | -                                                                                                                                                                                                                                                                                                                                                                              | -                                                                                                                                                                                                                                                                                                                                                                                                 | -                                | C_ushii_00515_mRNA_2.1      | -                           |
| GF0037635 | 0                             | 1                        | 0                        | Hypothetical protein (1)                                                      | -                                                                                                                                                                                                                                                                                                                                                                              | -                                                                                                                                                                                                                                                                                                                                                                                                 | -                                | C_ushii_00514_mRNA_14.1     | -                           |
| GF0037634 | 0                             | 1                        | 0                        | Hypothetical protein (1)                                                      | -                                                                                                                                                                                                                                                                                                                                                                              | -                                                                                                                                                                                                                                                                                                                                                                                                 | -                                | C_ushii_00514_mRNA_27.1     | -                           |
| GF0037633 | 0                             | 1                        | 0                        | Cytosolic ribonucleic 5'-nucleotidyl transferase (1)                          | -                                                                                                                                                                                                                                                                                                                                                                              | -                                                                                                                                                                                                                                                                                                                                                                                                 | -                                | C_ushii_00514_mRNA_26.1     | -                           |
| GF0037632 | 0                             | 1                        | 0                        | Hypothetical protein (1)                                                      | -                                                                                                                                                                                                                                                                                                                                                                              | -                                                                                                                                                                                                                                                                                                                                                                                                 | -                                | C_ushii_00514_mRNA_24.1     | -                           |
| GF0037631 | 0                             | 1                        | 0                        | LINE-type retrotransposon L1b DNA, insertion at the S11 site-like protein (1) | -                                                                                                                                                                                                                                                                                                                                                                              | -                                                                                                                                                                                                                                                                                                                                                                                                 | -                                | C_ushii_00514_mRNA_22.1     | -                           |
| GF0037630 | 0                             | 1                        | 0                        | Hypothetical protein (1)                                                      | -                                                                                                                                                                                                                                                                                                                                                                              | -                                                                                                                                                                                                                                                                                                                                                                                                 | -                                | C_ushii_00514_mRNA_12.1     | -                           |
| GF0037629 | 0                             | 1                        | 0                        | Hypothetical protein (1)                                                      | -                                                                                                                                                                                                                                                                                                                                                                              | -                                                                                                                                                                                                                                                                                                                                                                                                 | -                                | C_ushii_00513_mRNA_8.1      | -                           |
| GF0037628 | 0                             | 1                        | 0                        | Hypothetical protein (1)                                                      | potassium ion binding [GO:0003955 molecular_function] (1); catalytic activity [GO:0003824 molecular_function] (1); magnesium ion binding [GO:0000287 molecular_function] (1); glycolytic process [GO:0006099 biological_process] (1); pyruvate kinase activity [GO:0004743 molecular_function] (1)                                                                             | Pyruvate kinase, barrel [IPR015793] (1); Pyruvate kinase, C-terminal [IPR015795] (1); Pyruvate/Phosphoenolpyruvate kinase-like domain [IPR015813] (1); Pyruvate kinase, alpha-beta [IPR015794] (1); Pyruvate kinase [IPR001697] (1)                                                                                                                                                               | -                                | C_ushii_00512_mRNA_2.2      | -                           |
| GF0037627 | 0                             | 1                        | 0                        | Hypothetical protein (1)                                                      | -                                                                                                                                                                                                                                                                                                                                                                              | -                                                                                                                                                                                                                                                                                                                                                                                                 | -                                | C_ushii_00512_mRNA_9.1      | -                           |
| GF0037626 | 0                             | 1                        | 0                        | Hypothetical protein (1)                                                      | protein dimerization activity [GO:0046983 molecular_function] (1); nucleic acid binding [GO:0003676 molecular_function] (1)                                                                                                                                                                                                                                                    | Ribonuclease H-like domain [IPR012337] (1); HAT, C-terminal dimerization domain [IPR008906] (1)                                                                                                                                                                                                                                                                                                   | -                                | C_ushii_00512_mRNA_6.1      | -                           |
| GF0037625 | 0                             | 1                        | 0                        | Hypothetical protein (1)                                                      | -                                                                                                                                                                                                                                                                                                                                                                              | -                                                                                                                                                                                                                                                                                                                                                                                                 | -                                | C_ushii_00512_mRNA_5.1      | -                           |
| GF0037624 | 0                             | 1                        | 0                        | Hypothetical protein (1)                                                      | -                                                                                                                                                                                                                                                                                                                                                                              | -                                                                                                                                                                                                                                                                                                                                                                                                 | -                                | C_ushii_00512_mRNA_4.1      | -                           |
| GF0037623 | 0                             | 1                        | 0                        | Hypothetical protein (1)                                                      | -                                                                                                                                                                                                                                                                                                                                                                              | -                                                                                                                                                                                                                                                                                                                                                                                                 | -                                | C_ushii_00512_mRNA_22.1     | -                           |
| GF0037622 | 0                             | 1                        | 0                        | Hypothetical protein (1)                                                      | -                                                                                                                                                                                                                                                                                                                                                                              | -                                                                                                                                                                                                                                                                                                                                                                                                 | -                                | C_ushii_00512_mRNA_16.1     | -                           |
| GF0037621 | 0                             | 1                        | 0                        | Hypothetical protein (1)                                                      | -                                                                                                                                                                                                                                                                                                                                                                              | -                                                                                                                                                                                                                                                                                                                                                                                                 | -                                | C_ushii_00512_mRNA_15.1     | -                           |
| GF0037620 | 0                             | 1                        | 0                        | Hypothetical protein (1)                                                      | protein binding [GO:0005515 molecular_function] (1); protein kinase activity [GO:0006072 molecular_function] (1); protein phosphorylation [GO:0006468 biological_process] (1)                                                                                                                                                                                                  | Protein kinase-like domain [IPR011009] (1); Leucine-rich repeat domain, L domain-like [IPR02675] (1); Concentrator A-like leucine-glutamine domain [IPR013320] (1); Serine-threonine/tyrosine-protein kinase catalytic domain [IPR001245] (1); Leucine-rich repeat [IPR001611] (1)                                                                                                                | -                                | C_ushii_00512_mRNA_12.1     | -                           |
| GF0037619 | 0                             | 1                        | 0                        | Histidine biosynthesis functional protein hsdR (1)                            | phosphoribosyl-AMP cyclohydrolase activity [GO:0006315 molecular_function] (1); phosphoribosyl-ATP diphosphatase activity [GO:0006463 molecular_function] (1); histidine biosynthetic process [GO:0000105 biological_process] (1); metabolic process [GO:0008152 biological_process] (1); transferase activity, transferring hexoyl groups [GO:0016758 molecular_function] (1) | Phosphoribosyl-AMP cyclohydrolase domain [IPR002496] (1); Phosphoribosyl-ATP diphosphatase [IPR008179] (1); Phosphoribosyl-ATP pyrophosphatase-like [IPR0021130] (1)                                                                                                                                                                                                                              | -                                | C_ushii_00512_mRNA_1.1      | -                           |
| GF0037618 | 0                             | 1                        | 0                        | UDP-glucosyltransferase 85A2 (1)                                              | -                                                                                                                                                                                                                                                                                                                                                                              | -                                                                                                                                                                                                                                                                                                                                                                                                 | -                                | C_ushii_00511_mRNA_8.1      | -                           |
| GF0037617 | 0                             | 1                        | 0                        | Hypothetical protein (1)                                                      | -                                                                                                                                                                                                                                                                                                                                                                              | -                                                                                                                                                                                                                                                                                                                                                                                                 | -                                | C_ushii_00511_mRNA_6.1      | -                           |
| GF0037616 | 0                             | 1                        | 0                        | Hypothetical protein (1)                                                      | -                                                                                                                                                                                                                                                                                                                                                                              | -                                                                                                                                                                                                                                                                                                                                                                                                 | -                                | C_ushii_00511_mRNA_3.1      | -                           |
| GF0037615 | 0                             | 1                        | 0                        | Hypothetical protein (1)                                                      | -                                                                                                                                                                                                                                                                                                                                                                              | -                                                                                                                                                                                                                                                                                                                                                                                                 | -                                | C_ushii_00511_mRNA_2.1      | -                           |
| GF0037614 | 0                             | 1                        | 0                        | Hypothetical protein (1)                                                      | nucleus [GO:0005634 cellular_component] (1); rRNA methylation [GO:0011167 biological_process] (1); rRNA processing [GO:0006364 biological_process] (1); rRNA methyltransferase activity [GO:0006849 molecular_function] (1); methyltransferase activity [GO:0008168 molecular_function] (1); rRNA methylation [GO:0001510 biological_process] (1)                              | AdoMet-dependent rRNA methyltransferase, SpB [IPR028589] (1); Ribosomal RNA methyltransferase, SpB, C-terminal [IPR012920] (1); Ribosomal RNA base-methyltransferase E [IPR015507] (1)                                                                                                                                                                                                            | -                                | C_ushii_00511_mRNA_13.1     | -                           |

| ID        | Num. in C. crotteniae | Num. in C. auris | Num. in P. putida | Name                                                                     | GO                                                                                                                                                                                                                                                                                                                                                                                 | InterPro                                                                                                                                                                                                                                                        | Members in C. crotteniae | Members in C. auris     | Members in P. putida |
|-----------|-----------------------|------------------|-------------------|--------------------------------------------------------------------------|------------------------------------------------------------------------------------------------------------------------------------------------------------------------------------------------------------------------------------------------------------------------------------------------------------------------------------------------------------------------------------|-----------------------------------------------------------------------------------------------------------------------------------------------------------------------------------------------------------------------------------------------------------------|--------------------------|-------------------------|----------------------|
| GF0037613 | 0                     | 1                | 0                 | Phenylketonaminate benzoyl ether reductase (1)                           | histone acetyltransferase activity [GO:0004602 molecular_function] (1); regulation of transcription, DNA-templated [GO:0006355 biological_process] (1); zinc ion binding [GO:0008270 molecular_function] (1); nucleus [GO:0005634 cellular_component] (1); transcription cofactor activity [GO:0003712 molecular_function] (1)                                                     | NraA-like domain [IPR000030] (1); NAD(P)-binding domain [IPR016400] (1)                                                                                                                                                                                         | -                        | C_ushii_00511_mRNA_11.1 | -                    |
| GF0037612 | 0                     | 1                | 0                 | BTB/POZ and TAZ domain protein (1)                                       | SKP1/HTB/POZ domain [IPR01333] (1); Zinc finger, TAZ-type [IPR000197] (1)                                                                                                                                                                                                                                                                                                          | -                                                                                                                                                                                                                                                               | -                        | C_ushii_00510_mRNA_3.1  | -                    |
| GF0037611 | 0                     | 1                | 0                 | Hypothetical protein (1)                                                 | -                                                                                                                                                                                                                                                                                                                                                                                  | -                                                                                                                                                                                                                                                               | -                        | C_ushii_00510_mRNA_26.1 | -                    |
| GF0037610 | 0                     | 1                | 0                 | Hypothetical protein (1)                                                 | -                                                                                                                                                                                                                                                                                                                                                                                  | -                                                                                                                                                                                                                                                               | -                        | C_ushii_00510_mRNA_24.1 | -                    |
| GF0037609 | 0                     | 1                | 0                 | Hypothetical protein (1)                                                 | -                                                                                                                                                                                                                                                                                                                                                                                  | -                                                                                                                                                                                                                                                               | -                        | C_ushii_00510_mRNA_11.3 | -                    |
| GF0037608 | 0                     | 1                | 0                 | Oxalate oxidase 2 (1)                                                    | nutrient reservoir activity [GO:0045735 molecular_function] (1)                                                                                                                                                                                                                                                                                                                    | RimC-like jelly roll fold [IPR014710] (1); Cupin 1 [IPR006045] (1); RimC-like cupin domain [IPR011051] (1)                                                                                                                                                      | -                        | C_ushii_00509_mRNA_21.1 | -                    |
| GF0037607 | 0                     | 1                | 0                 | Hypothetical protein (1)                                                 | -                                                                                                                                                                                                                                                                                                                                                                                  | -                                                                                                                                                                                                                                                               | -                        | C_ushii_00508_mRNA_9.1  | -                    |
| GF0037606 | 0                     | 1                | 0                 | Hemeprotein (1)                                                          | -                                                                                                                                                                                                                                                                                                                                                                                  | -                                                                                                                                                                                                                                                               | -                        | C_ushii_00508_mRNA_5.1  | -                    |
| GF0037605 | 0                     | 1                | 0                 | Hypothetical protein (1)                                                 | zinc ion binding [GO:0008270 molecular_function] (1); nucleic acid binding [GO:0003676 molecular_function] (1)                                                                                                                                                                                                                                                                     | Zinc knuckle CX2CX4HX4C [IPR025836] (1); Zinc finger, CCHC-type [IPR004183] (1); Endonuclease/cromolide/phosphatase DUF4283 [IPR025588] (1)                                                                                                                     | -                        | C_ushii_00508_mRNA_13.1 | -                    |
| GF0037604 | 0                     | 1                | 0                 | Retrotransposon protein, putative, unclassified (1)                      | ferrous iron binding [GO:0008198 molecular_function] (1); Eukaryotic aromatic compound metabolic process [GO:0006725 biological_process] (1); oxidoreductase activity [GO:0016491 molecular_function] (1)                                                                                                                                                                          | Reverse transcriptase zinc-binding domain [IPR026900] (1); Eukaryotic ring-cleavage deoxygenase, class III enzyme, subunit B [IPR004183] (1); Endonuclease/cromolide/phosphatase [IPR005135] (1)                                                                | -                        | C_ushii_00508_mRNA_12.1 | -                    |
| GF0037603 | 0                     | 1                | 0                 | Eukaryotic rps RNA polymerase subunit protein (1)                        | transcription, DNA-templated [GO:0006355 biological_process] (1); DNA-directed RNA polymerase activity [GO:0003999 molecular_function] (1); nucleus [GO:0005634 cellular_component] (1); DNA binding [GO:0003677 molecular_function] (1)                                                                                                                                           | RNA polymerase, Rpb5, N-terminal subunit [IPR005171] (1); RNA polymerase, subunit H/Rpb5 C-terminal [IPR000783] (1)                                                                                                                                             | -                        | C_ushii_00508_mRNA_1.1  | -                    |
| GF0037602 | 0                     | 1                | 0                 | Hypothetical protein (1)                                                 | -                                                                                                                                                                                                                                                                                                                                                                                  | -                                                                                                                                                                                                                                                               | -                        | C_ushii_00507_mRNA_9.1  | -                    |
| GF0037601 | 0                     | 1                | 0                 | Hypothetical protein (1)                                                 | -                                                                                                                                                                                                                                                                                                                                                                                  | -                                                                                                                                                                                                                                                               | -                        | C_ushii_00507_mRNA_5.1  | -                    |
| GF0037600 | 0                     | 1                | 0                 | Hypothetical protein (1)                                                 | -                                                                                                                                                                                                                                                                                                                                                                                  | -                                                                                                                                                                                                                                                               | -                        | C_ushii_00507_mRNA_4.1  | -                    |
| GF0037599 | 0                     | 1                | 0                 | Hypothetical protein (1)                                                 | -                                                                                                                                                                                                                                                                                                                                                                                  | -                                                                                                                                                                                                                                                               | -                        | C_ushii_00507_mRNA_14.1 | -                    |
| GF0037598 | 0                     | 1                | 0                 | Hypothetical protein (1)                                                 | -                                                                                                                                                                                                                                                                                                                                                                                  | -                                                                                                                                                                                                                                                               | -                        | C_ushii_00507_mRNA_1.1  | -                    |
| GF0037597 | 0                     | 1                | 0                 | Hypothetical protein (1)                                                 | -                                                                                                                                                                                                                                                                                                                                                                                  | -                                                                                                                                                                                                                                                               | -                        | C_ushii_00506_mRNA_3.1  | -                    |
| GF0037596 | 0                     | 1                | 0                 | Hypothetical protein (1)                                                 | -                                                                                                                                                                                                                                                                                                                                                                                  | -                                                                                                                                                                                                                                                               | -                        | C_ushii_00506_mRNA_22.1 | -                    |
| GF0037595 | 0                     | 1                | 0                 | Hypothetical protein (1)                                                 | -                                                                                                                                                                                                                                                                                                                                                                                  | -                                                                                                                                                                                                                                                               | -                        | C_ushii_00506_mRNA_21.1 | -                    |
| GF0037594 | 0                     | 1                | 0                 | Hypothetical protein (1)                                                 | -                                                                                                                                                                                                                                                                                                                                                                                  | -                                                                                                                                                                                                                                                               | -                        | C_ushii_00506_mRNA_2.1  | -                    |
| GF0037593 | 0                     | 1                | 0                 | Hypothetical protein (1)                                                 | -                                                                                                                                                                                                                                                                                                                                                                                  | -                                                                                                                                                                                                                                                               | -                        | C_ushii_00506_mRNA_19.1 | -                    |
| GF0037592 | 0                     | 1                | 0                 | Hypothetical protein (1)                                                 | membrane [GO:0016020 cellular_component] (1); potassium ion transmembrane transporter [GO:0071805 biological_process] (1); potassium ion transmembrane transporter activity [GO:0010679 molecular_function] (1)                                                                                                                                                                    | Potassium transporter [IPR003855] (1)                                                                                                                                                                                                                           | -                        | C_ushii_00506_mRNA_16.1 | -                    |
| GF0037591 | 0                     | 1                | 0                 | Hypothetical protein (1)                                                 | -                                                                                                                                                                                                                                                                                                                                                                                  | -                                                                                                                                                                                                                                                               | -                        | C_ushii_00506_mRNA_11.1 | -                    |
| GF0037590 | 0                     | 1                | 0                 | NADH dehydrogenase (ubiquinone) iron sulfur protein 7, mitochondrial (1) | oxidation-reduction process [GO:0055114 biological_process] (1); ubiquinol binding [GO:0048038 molecular_function] (1); NADH dehydrogenase (ubiquinone) iron-sulfur cluster binding [GO:0051539 molecular_function] (1); iron-sulfur cluster binding [GO:0051536 molecular_function] (1)                                                                                           | NADH ubiquinone oxidoreductase, 20 kDa subunit [IPR006138] (1); NADH ubiquinone oxidoreductase-like, 20kDa subunit [IPR006137] (1)                                                                                                                              | -                        | C_ushii_00505_mRNA_5.1  | -                    |
| GF0037589 | 0                     | 1                | 0                 | Hypothetical protein (1)                                                 | -                                                                                                                                                                                                                                                                                                                                                                                  | -                                                                                                                                                                                                                                                               | -                        | C_ushii_00505_mRNA_31.1 | -                    |
| GF0037588 | 0                     | 1                | 0                 | Hypothetical protein (1)                                                 | -                                                                                                                                                                                                                                                                                                                                                                                  | -                                                                                                                                                                                                                                                               | -                        | C_ushii_00505_mRNA_19.1 | -                    |
| GF0037587 | 0                     | 1                | 0                 | Hypothetical protein (1)                                                 | -                                                                                                                                                                                                                                                                                                                                                                                  | -                                                                                                                                                                                                                                                               | -                        | C_ushii_00505_mRNA_16.1 | -                    |
| GF0037586 | 0                     | 1                | 0                 | Hypothetical protein (1)                                                 | -                                                                                                                                                                                                                                                                                                                                                                                  | -                                                                                                                                                                                                                                                               | -                        | C_ushii_00504_mRNA_8.1  | -                    |
| GF0037585 | 0                     | 1                | 0                 | Blue copper protein (1)                                                  | electron carrier activity [GO:0009055 molecular_function] (1)                                                                                                                                                                                                                                                                                                                      | Phytochrome domain [IPR003245] (1); Blue type I copper protein, binding site [IPR028711] (1); Cuprodoxin [IPR008972] (1)                                                                                                                                        | -                        | C_ushii_00504_mRNA_21.1 | -                    |
| GF0037584 | 0                     | 1                | 0                 | Hypothetical protein (1)                                                 | -                                                                                                                                                                                                                                                                                                                                                                                  | -                                                                                                                                                                                                                                                               | -                        | C_ushii_00504_mRNA_20.1 | -                    |
| GF0037583 | 0                     | 1                | 0                 | Hypothetical protein (1)                                                 | -                                                                                                                                                                                                                                                                                                                                                                                  | -                                                                                                                                                                                                                                                               | -                        | C_ushii_00504_mRNA_10.1 | -                    |
| GF0037582 | 0                     | 1                | 0                 | Hypothetical protein (1)                                                 | -                                                                                                                                                                                                                                                                                                                                                                                  | -                                                                                                                                                                                                                                                               | -                        | C_ushii_00503_mRNA_4.1  | -                    |
| GF0037581 | 0                     | 1                | 0                 | Lipase class 3 family protein (1)                                        | lipid metabolic process [GO:0006629 biological_process] (1)                                                                                                                                                                                                                                                                                                                        | Fungal lipase-like domain [IPR002921] (1); Alpha/Beta hydrolase fold [IPR029098] (1)                                                                                                                                                                            | -                        | C_ushii_00503_mRNA_3.1  | -                    |
| GF0037580 | 0                     | 1                | 0                 | Hypothetical protein (1)                                                 | protein transporter activity [GO:0008565 molecular_function] (1); multicopy/plasmid transport [GO:0006913 biological_process] (1)                                                                                                                                                                                                                                                  | Importin subunit beta-1, plants [IPR027140] (1)                                                                                                                                                                                                                 | -                        | C_ushii_00503_mRNA_29.1 | -                    |
| GF0037579 | 0                     | 1                | 0                 | Hypothetical protein (1)                                                 | -                                                                                                                                                                                                                                                                                                                                                                                  | -                                                                                                                                                                                                                                                               | -                        | C_ushii_00503_mRNA_27.1 | -                    |
| GF0037578 | 0                     | 1                | 0                 | Beta-ketoadyl-acyl-carrier-protein synthase II (1)                       | catalytic activity [GO:0003824 molecular_function] (1); metabolic process [GO:0008152 biological_process] (1)                                                                                                                                                                                                                                                                      | Beta-ketoadyl synthase, N-terminal [IPR014030] (1); Beta-ketoadyl synthase, active site [IPR018201] (1); Beta-ketoadyl synthase, C-terminal [IPR014031] (1); Polyketide synthase, beta-ketoadyl synthase domain [IPR020841] (1); Thioester-like [IPR016039] (1) | -                        | C_ushii_00503_mRNA_16.1 | -                    |
| GF0037577 | 0                     | 1                | 0                 | Hypothetical protein (1)                                                 | -                                                                                                                                                                                                                                                                                                                                                                                  | -                                                                                                                                                                                                                                                               | -                        | C_ushii_00503_mRNA_15.1 | -                    |
| GF0037576 | 0                     | 1                | 0                 | UDP-glucose 4-epimerase GEp48 (1)                                        | UDP-glucose 4-epimerase activity [GO:0003978 molecular_function] (1); glucoisomerase activity [GO:0006601 biological_process] (1)                                                                                                                                                                                                                                                  | UDP-glucose 4-epimerase GalP [IPR005886] (1); NAD(P)-binding domain [IPR016400] (1)                                                                                                                                                                             | -                        | C_ushii_00502_mRNA_1.1  | -                    |
| GF0037575 | 0                     | 1                | 0                 | Hypothetical protein (1)                                                 | -                                                                                                                                                                                                                                                                                                                                                                                  | -                                                                                                                                                                                                                                                               | -                        | C_ushii_00502_mRNA_8.1  | -                    |
| GF0037574 | 0                     | 1                | 0                 | Hypothetical protein (1)                                                 | -                                                                                                                                                                                                                                                                                                                                                                                  | -                                                                                                                                                                                                                                                               | -                        | C_ushii_00502_mRNA_5.1  | -                    |
| GF0037573 | 0                     | 1                | 0                 | Hypothetical protein (1)                                                 | -                                                                                                                                                                                                                                                                                                                                                                                  | -                                                                                                                                                                                                                                                               | -                        | C_ushii_00502_mRNA_2.1  | -                    |
| GF0037572 | 0                     | 1                | 0                 | Hypothetical protein (1)                                                 | -                                                                                                                                                                                                                                                                                                                                                                                  | -                                                                                                                                                                                                                                                               | -                        | C_ushii_00502_mRNA_19.1 | -                    |
| GF0037571 | 0                     | 1                | 0                 | Hypothetical protein (1)                                                 | -                                                                                                                                                                                                                                                                                                                                                                                  | -                                                                                                                                                                                                                                                               | -                        | C_ushii_00502_mRNA_14.1 | -                    |
| GF0037570 | 0                     | 1                | 0                 | Hypothetical protein (1)                                                 | -                                                                                                                                                                                                                                                                                                                                                                                  | -                                                                                                                                                                                                                                                               | -                        | C_ushii_00502_mRNA_12.1 | -                    |
| GF0037569 | 0                     | 1                | 0                 | Hypothetical protein (1)                                                 | DNA binding [GO:0003677 molecular_function] (1); regulation of transcription, DNA-templated [GO:0006355 biological_process] (1); proteolysis [GO:0006508 biological_process] (1)                                                                                                                                                                                                   | NAC domain [IPR003441] (1); Zinc finger, BED-type [IPR003656] (1)                                                                                                                                                                                               | -                        | C_ushii_00502_mRNA_11.1 | -                    |
| GF0037568 | 0                     | 1                | 0                 | Hypothetical protein (1)                                                 | -                                                                                                                                                                                                                                                                                                                                                                                  | -                                                                                                                                                                                                                                                               | -                        | C_ushii_00501_mRNA_9.1  | -                    |
| GF0037567 | 0                     | 1                | 0                 | Hypothetical protein (1)                                                 | -                                                                                                                                                                                                                                                                                                                                                                                  | -                                                                                                                                                                                                                                                               | -                        | C_ushii_00501_mRNA_7.1  | -                    |
| GF0037566 | 0                     | 1                | 0                 | Hypothetical protein (1)                                                 | -                                                                                                                                                                                                                                                                                                                                                                                  | -                                                                                                                                                                                                                                                               | -                        | C_ushii_00501_mRNA_20.1 | -                    |
| GF0037565 | 0                     | 1                | 0                 | Hypothetical protein (1)                                                 | -                                                                                                                                                                                                                                                                                                                                                                                  | -                                                                                                                                                                                                                                                               | -                        | C_ushii_00501_mRNA_2.1  | -                    |
| GF0037564 | 0                     | 1                | 0                 | Non-LTR retrotransposon reverse transcriptase-like (1)                   | nucleic acid binding [GO:0003676 molecular_function] (1); RNA-DNA hybrid ribonuclease activity [GO:0004523 molecular_function] (1)                                                                                                                                                                                                                                                 | Reverse transcriptase zinc-binding domain [IPR026900] (1); Ribonuclease H-like domain [IPR025371] (1); Ribonuclease H domain [IPR002156] (1)                                                                                                                    | -                        | C_ushii_00501_mRNA_19.1 | -                    |
| GF0037563 | 0                     | 1                | 0                 | Hypothetical protein (1)                                                 | -                                                                                                                                                                                                                                                                                                                                                                                  | -                                                                                                                                                                                                                                                               | -                        | C_ushii_00501_mRNA_12.1 | -                    |
| GF0037562 | 0                     | 1                | 0                 | Hypothetical protein (1)                                                 | -                                                                                                                                                                                                                                                                                                                                                                                  | -                                                                                                                                                                                                                                                               | -                        | C_ushii_00501_mRNA_11.1 | -                    |
| GF0037561 | 0                     | 1                | 0                 | Hypothetical protein (1)                                                 | -                                                                                                                                                                                                                                                                                                                                                                                  | -                                                                                                                                                                                                                                                               | -                        | C_ushii_00501_mRNA_10.1 | -                    |
| GF0037560 | 0                     | 1                | 0                 | Hypothetical protein (1)                                                 | -                                                                                                                                                                                                                                                                                                                                                                                  | -                                                                                                                                                                                                                                                               | -                        | C_ushii_00500_mRNA_20.1 | -                    |
| GF0037559 | 0                     | 1                | 0                 | Hypothetical protein (1)                                                 | -                                                                                                                                                                                                                                                                                                                                                                                  | -                                                                                                                                                                                                                                                               | -                        | C_ushii_00500_mRNA_17.1 | -                    |
| GF0037558 | 0                     | 1                | 0                 | Hypothetical protein (1)                                                 | -                                                                                                                                                                                                                                                                                                                                                                                  | -                                                                                                                                                                                                                                                               | -                        | C_ushii_00499_mRNA_26.1 | -                    |
| GF0037557 | 0                     | 1                | 0                 | Cytoskin riboside 5'-monophosphate phosphohydrolyase (1)                 | -                                                                                                                                                                                                                                                                                                                                                                                  | -                                                                                                                                                                                                                                                               | -                        | C_ushii_00499_mRNA_25.1 | -                    |
| GF0037556 | 0                     | 1                | 0                 | Hypothetical protein (1)                                                 | -                                                                                                                                                                                                                                                                                                                                                                                  | -                                                                                                                                                                                                                                                               | -                        | C_ushii_00499_mRNA_24.1 | -                    |
| GF0037555 | 0                     | 1                | 0                 | Hypothetical protein (1)                                                 | DNA-directed RNA polymerase II, core complex [GO:0006065 cellular_component] (1); DNA binding [GO:0003677 molecular_function] (1); transcription from RNA polymerase II promoter [GO:0006366 biological_process] (1)                                                                                                                                                               | RNA polymerase II, hyperphosphorylated repeat, eukaryotic [IPR006084] (1)                                                                                                                                                                                       | -                        | C_ushii_00499_mRNA_23.1 | -                    |
| GF0037554 | 0                     | 1                | 0                 | Hypothetical protein (1)                                                 | ammonium transport [GO:0015606 biological_process] (1); membrane [GO:0016020 cellular_component] (1); transcription, DNA-templated [GO:0006355 biological_process] (1); DNA-directed RNA polymerase activity [GO:0003999 molecular_function] (1); DNA binding [GO:0003677 molecular_function] (1); ammonium transmembrane transporter activity [GO:0008519 molecular_function] (1) | RNA polymerase Rpb1, domain 1 [IPR007080] (1); Ammonium/urea transporter [IPR029020] (1); Ammonium transporter, archa-like domain [IPR024041] (1)                                                                                                               | -                        | C_ushii_00499_mRNA_22.1 | -                    |
| GF0037553 | 0                     | 1                | 0                 | Hypothetical protein (1)                                                 | -                                                                                                                                                                                                                                                                                                                                                                                  | -                                                                                                                                                                                                                                                               | -                        | C_ushii_00499_mRNA_18.1 | -                    |
| GF0037552 | 0                     | 1                | 0                 | Perakine reductase (1)                                                   | -                                                                                                                                                                                                                                                                                                                                                                                  | -                                                                                                                                                                                                                                                               | -                        | C_ushii_00499_mRNA_14.1 | -                    |
| GF0037551 | 0                     | 1                | 0                 | Hypothetical protein (1)                                                 | -                                                                                                                                                                                                                                                                                                                                                                                  | -                                                                                                                                                                                                                                                               | -                        | C_ushii_00499_mRNA_13.1 | -                    |
| GF0037550 | 0                     | 1                | 0                 | Hypothetical protein (1)                                                 | -                                                                                                                                                                                                                                                                                                                                                                                  | -                                                                                                                                                                                                                                                               | -                        | C_ushii_00499_mRNA_12.1 | -                    |
| GF0037549 | 0                     | 1                | 0                 | Hypothetical protein (1)                                                 | -                                                                                                                                                                                                                                                                                                                                                                                  | -                                                                                                                                                                                                                                                               | -                        | C_ushii_00499_mRNA_10.1 | -                    |
| GF0037548 | 0                     | 1                | 0                 | Hypothetical protein (1)                                                 | -                                                                                                                                                                                                                                                                                                                                                                                  | -                                                                                                                                                                                                                                                               | -                        | C_ushii_00498_mRNA_23.1 | -                    |
| GF0037547 | 0                     | 1                | 0                 | Hypothetical protein (1)                                                 | -                                                                                                                                                                                                                                                                                                                                                                                  | -                                                                                                                                                                                                                                                               | -                        | C_ushii_00498_mRNA_2.1  | -                    |

| ID        | Num in C. crottensteii | Num in C. auris | Num in P. putida | Note                                                    | GO                                                                                                                                                                                                                                                                                                                 | InterPro                                                                                                                                                                                                                                                                                                                                                                                         | Members in C. crottensteii | Members in C. auris     | Members in P. putida |
|-----------|------------------------|-----------------|------------------|---------------------------------------------------------|--------------------------------------------------------------------------------------------------------------------------------------------------------------------------------------------------------------------------------------------------------------------------------------------------------------------|--------------------------------------------------------------------------------------------------------------------------------------------------------------------------------------------------------------------------------------------------------------------------------------------------------------------------------------------------------------------------------------------------|----------------------------|-------------------------|----------------------|
| GF0037546 | 0                      | 1               | 0                | Thermopermease synthase ACALLIS protein (1)             |                                                                                                                                                                                                                                                                                                                    | S-adenosyl-L-methionine-dependent methyltransferase [IPRO29661] (1); Polyamine biosynthesis domain [IPRO30374] (4)                                                                                                                                                                                                                                                                               | -                          | C_umhiu_00498_mRNA_14.1 | -                    |
| GF0037545 | 0                      | 1               | 0                | Hypothetical protein (1)                                |                                                                                                                                                                                                                                                                                                                    |                                                                                                                                                                                                                                                                                                                                                                                                  | -                          | C_umhiu_00498_mRNA_1.1  | -                    |
| GF0037544 | 0                      | 1               | 0                | Hypothetical protein (1)                                |                                                                                                                                                                                                                                                                                                                    |                                                                                                                                                                                                                                                                                                                                                                                                  | -                          | C_umhiu_00497_mRNA_7.1  | -                    |
| GF0037543 | 0                      | 1               | 0                | Hypothetical protein (1)                                |                                                                                                                                                                                                                                                                                                                    |                                                                                                                                                                                                                                                                                                                                                                                                  | -                          | C_umhiu_00497_mRNA_26.1 | -                    |
| GF0037542 | 0                      | 1               | 0                | Hypothetical protein (1)                                | hydrolase activity [GO:0016787] molecular_function (1); metabolic process [GO:0008152 biological_process] (1)                                                                                                                                                                                                      | Alpha/beta hydrolase fold-3 [IPRO13094] (1); Alpha/Beta hydrolase fold [IPRO29581] (1)                                                                                                                                                                                                                                                                                                           | -                          | C_umhiu_00497_mRNA_25.1 | -                    |
| GF0037541 | 0                      | 1               | 0                | CXE carboxylesterase (1)                                | hydrolase activity [GO:0016787] molecular_function (1); metabolic process [GO:0008152 biological_process] (1)                                                                                                                                                                                                      | Alpha/Beta hydrolase fold [IPRO29581] (1); Alpha/beta hydrolase fold-3 [IPRO13094] (1); Lipase, GXCC [IPRO13140] (1)                                                                                                                                                                                                                                                                             | -                          | C_umhiu_00497_mRNA_24.1 | -                    |
| GF0037540 | 0                      | 1               | 0                | Hypothetical protein (1)                                |                                                                                                                                                                                                                                                                                                                    |                                                                                                                                                                                                                                                                                                                                                                                                  | -                          | C_umhiu_00497_mRNA_21.1 | -                    |
| GF0037539 | 0                      | 1               | 0                | Hypothetical protein (1)                                | kinetochore [GO:0000776] cellular_component (1); kinetochore assembly [GO:0051282] biological_process (1); centromeric DNA binding [GO:0019237] molecular_function (1)                                                                                                                                             | Centromere protein C/Mid/ep3 [IPRO28361] (1)                                                                                                                                                                                                                                                                                                                                                     | -                          | C_umhiu_00496_mRNA_9.1  | -                    |
| GF0037538 | 0                      | 1               | 0                | Hypothetical protein (1)                                |                                                                                                                                                                                                                                                                                                                    |                                                                                                                                                                                                                                                                                                                                                                                                  | -                          | C_umhiu_00496_mRNA_21.1 | -                    |
| GF0037537 | 0                      | 1               | 0                | Monosaccharide transport protein (1)                    |                                                                                                                                                                                                                                                                                                                    | Wall-associated receptor kinase, galacturonan-binding domain [IPRO25271] (1); Protein kinase-like domain [IPRO11009] (1); Protein kinase domain [IPRO00019] (1); Serine/threonine-tyrosine protein kinase catalytic domain [IPRO01245] (1); Serine/threonine/tyrosine specificity protein kinase, catalytic domain [IPRO02290] (1); Serine/threonine protein kinase, active site [IPRO00271] (1) | -                          | C_umhiu_00496_mRNA_11.1 | -                    |
| GF0037536 | 0                      | 1               | 0                | Wall-associated receptor kinase 2 (1)                   | protein kinase activity [GO:0004672] molecular_function (1); protein phosphorylation [GO:0006468] biological_process (1); polysaccharide binding [GO:0003027] molecular_function (1); ATP binding [GO:0005524] molecular_function (1)                                                                              |                                                                                                                                                                                                                                                                                                                                                                                                  | -                          | C_umhiu_00496_mRNA_1.1  | -                    |
| GF0037535 | 0                      | 1               | 0                | L18 ribosomal protein Heart Stopper (1)                 | translation [GO:0006412] biological_process (1); intracellular [GO:0006322] cellular_component (1); structural constituent of ribosome [GO:0005735] molecular_function (1); ribosome [GO:0005840] cellular_component (1)                                                                                           | Ribosomal protein L18.L5 [IPRO005484] (1)                                                                                                                                                                                                                                                                                                                                                        | -                          | C_umhiu_00495_mRNA_29.1 | -                    |
| GF0037534 | 0                      | 1               | 0                | Hypothetical protein (1)                                | oxidation-reduction process [GO:0055114] biological_process (1); oxidoreductase activity, acting on paired donors, with incorporation or reduction of molecular oxygen [GO:0016705] molecular_function (1); heme binding [GO:0020037] molecular_function (1); iron ion binding [GO:0005506] molecular_function (1) | Cytochrome P450 [IPRO01128] (1)                                                                                                                                                                                                                                                                                                                                                                  | -                          | C_umhiu_00495_mRNA_26.1 | -                    |
| GF0037533 | 0                      | 1               | 0                | Hypothetical protein (1)                                | psedouridine synthase activity [GO:0009882] molecular_function (1); RNA modification [GO:0009451] biological_process (1); pseudouridine synthesis [GO:0001522] biological_process (1); RNA binding [GO:0003732] molecular_function (1)                                                                             | Probable zinc-ribon domain, plant [IPRO21480] (1); Pseudouridine synthase I, TrnA, C-terminal [IPRO20095] (1); Pseudouridine synthase I, TrnA, alpha/beta domain [IPRO20097] (1); Pseudouridine synthase, catalytic domain [IPRO01031] (1); Pseudouridine synthase I, TrnA, N-terminal [IPRO20094] (1); Pseudouridine synthase I, TrnA [IPRO01406] (1)                                           | -                          | C_umhiu_00495_mRNA_16.1 | -                    |
| GF0037532 | 0                      | 1               | 0                | BZIP transcription factor, putative; 7a38-7126 (1)      |                                                                                                                                                                                                                                                                                                                    |                                                                                                                                                                                                                                                                                                                                                                                                  | -                          | C_umhiu_00495_mRNA_14.1 | -                    |
| GF0037531 | 0                      | 1               | 0                | Hypothetical protein (1)                                |                                                                                                                                                                                                                                                                                                                    |                                                                                                                                                                                                                                                                                                                                                                                                  | -                          | C_umhiu_00495_mRNA_13.1 | -                    |
| GF0037530 | 0                      | 1               | 0                | Crooked neck protein / cell cycle protein, putative (1) | protein binding [GO:0005515] molecular_function (1); RNA processing [GO:0006396 biological_process] (1)                                                                                                                                                                                                            | HAT (Half-A-TPR) repeat [IPRO03107] (1); Tetra-tyrosine-like helical domain [IPRO11960] (1)                                                                                                                                                                                                                                                                                                      | -                          | C_umhiu_00495_mRNA_12.1 | -                    |
| GF0037529 | 0                      | 1               | 0                | Crooked neck protein/cell cycle protein, putative (1)   | protein binding [GO:0005515] molecular_function (1); RNA processing [GO:0006396 biological_process] (1)                                                                                                                                                                                                            | HAT (Half-A-TPR) repeat [IPRO03107] (1); Tetra-tyrosine-like helical domain [IPRO11960] (1); Tetra-tyrosine repeat-containing domain [IPRO13026] (1)                                                                                                                                                                                                                                             | -                          | C_umhiu_00495_mRNA_11.1 | -                    |
| GF0037528 | 0                      | 1               | 0                | Putative inactive receptor kinase (1)                   | ATP binding [GO:0005524] molecular_function (1); protein phosphorylation [GO:0006468] biological_process (1); protein kinase activity [GO:0004672] molecular_function (1); protein binding [GO:0005515] molecular_function (1)                                                                                     | Protein kinase domain [IPRO00719] (1); Concavalin A-like lectin/glycanase domain [IPRO13520] (1); Leucine-rich repeat domain, L domain-like [IPRO32675] (1); Protein kinase-like domain [IPRO11009] (1); Leucine-rich repeat-containing N-terminal, plant-type [IPRO13210] (1); Protein kinase, ATP binding site [IPRO17441] (1); Lactucrin repeat [IPRO01611] (1)                               | -                          | C_umhiu_00495_mRNA_1.1  | -                    |
| GF0037527 | 0                      | 1               | 0                | Hypothetical protein (1)                                |                                                                                                                                                                                                                                                                                                                    |                                                                                                                                                                                                                                                                                                                                                                                                  | -                          | C_umhiu_00493_mRNA_6.1  | -                    |
| GF0037526 | 0                      | 1               | 0                | ABC transporter G family member 40 (1)                  | ATPase activity [GO:0016887] molecular_function (1); membrane [GO:0016020] cellular_component (1); ATP binding [GO:0005524] molecular_function (1)                                                                                                                                                                 | ABC transporter-like [IPRO04350] (1); ABC 2-type transporter [IPRO13225] (1); ABC transporter extracellular N-terminal domain [IPRO08213] (1); Loop containing nucleoside triphosphate hydrolase [IPRO27417] (1)                                                                                                                                                                                 | -                          | C_umhiu_00493_mRNA_3.1  | -                    |
| GF0037525 | 0                      | 1               | 0                | TIR-NBS-LRR type disease resistance protein (1)         | protein binding [GO:0005515] molecular_function (1); signal transduction [GO:0007165] biological_process (1)                                                                                                                                                                                                       | Toll/interleukin-1 receptor homology (TIR) domain [IPRO00157] (1)                                                                                                                                                                                                                                                                                                                                | -                          | C_umhiu_00493_mRNA_13.1 | -                    |
| GF0037524 | 0                      | 1               | 0                | Hypothetical protein (1)                                |                                                                                                                                                                                                                                                                                                                    |                                                                                                                                                                                                                                                                                                                                                                                                  | -                          | C_umhiu_00493_mRNA_12.1 | -                    |
| GF0037523 | 0                      | 1               | 0                | Hypothetical protein (1)                                |                                                                                                                                                                                                                                                                                                                    |                                                                                                                                                                                                                                                                                                                                                                                                  | -                          | C_umhiu_00492_mRNA_6.1  | -                    |
| GF0037522 | 0                      | 1               | 0                | Hypothetical protein (1)                                |                                                                                                                                                                                                                                                                                                                    |                                                                                                                                                                                                                                                                                                                                                                                                  | -                          | C_umhiu_00492_mRNA_2.1  | -                    |
| GF0037521 | 0                      | 1               | 0                | Hypothetical protein (1)                                |                                                                                                                                                                                                                                                                                                                    |                                                                                                                                                                                                                                                                                                                                                                                                  | -                          | C_umhiu_00492_mRNA_13.1 | -                    |
| GF0037520 | 0                      | 1               | 0                | Hypothetical protein (1)                                | regulation of transcription, DNA-templated [GO:0006355] biological_process (1); nucleic acid binding [GO:0003676] molecular_function (1)                                                                                                                                                                           | Carboxy nucleic acid-binding protein [IPRO22568] (1)                                                                                                                                                                                                                                                                                                                                             | -                          | C_umhiu_00492_mRNA_12.1 | -                    |
| GF0037519 | 0                      | 1               | 0                | Hypothetical protein (1)                                |                                                                                                                                                                                                                                                                                                                    |                                                                                                                                                                                                                                                                                                                                                                                                  | -                          | C_umhiu_00492_mRNA_11.1 | -                    |
| GF0037518 | 0                      | 1               | 0                | Hypothetical protein (1)                                |                                                                                                                                                                                                                                                                                                                    |                                                                                                                                                                                                                                                                                                                                                                                                  | -                          | C_umhiu_00492_mRNA_1.1  | -                    |
| GF0037517 | 0                      | 1               | 0                | Hypothetical protein (1)                                | heme binding [GO:0020037] molecular_function (1); response to oxidative stress [GO:0006979] biological_process (1); peroxidase activity [GO:0004601] molecular_function (1); oxidation-reduction process [GO:0055114] biological_process (1)                                                                       | Haem peroxidase, plant/fungal/bacterial [IPRO20161] (1); Plant peroxidase [IPRO08221] (1); Peroxidase heme-binding site [IPRO17951] (1); Haem peroxidase [IPRO10255] (1)                                                                                                                                                                                                                         | -                          | C_umhiu_00491_mRNA_8.1  | -                    |
| GF0037516 | 0                      | 1               | 0                | Hypothetical protein (1)                                |                                                                                                                                                                                                                                                                                                                    |                                                                                                                                                                                                                                                                                                                                                                                                  | -                          | C_umhiu_00491_mRNA_7.1  | -                    |
| GF0037515 | 0                      | 1               | 0                | Hypothetical protein (1)                                | nucleotide binding [GO:0001666] molecular_function (1); nucleic acid binding [GO:0003676] molecular_function (1)                                                                                                                                                                                                   | RNA recognition motif domain [IPRO00464] (1); Nucleotide-binding alpha-beta plat domain [IPRO12677] (1)                                                                                                                                                                                                                                                                                          | -                          | C_umhiu_00491_mRNA_4.1  | -                    |
| GF0037514 | 0                      | 1               | 0                | Hypothetical protein (1)                                |                                                                                                                                                                                                                                                                                                                    |                                                                                                                                                                                                                                                                                                                                                                                                  | -                          | C_umhiu_00491_mRNA_3.1  | -                    |
| GF0037513 | 0                      | 1               | 0                | Hypothetical protein (1)                                |                                                                                                                                                                                                                                                                                                                    |                                                                                                                                                                                                                                                                                                                                                                                                  | -                          | C_umhiu_00491_mRNA_2.1  | -                    |
| GF0037512 | 0                      | 1               | 0                | Hypothetical protein (1)                                | DNA binding [GO:0003677] molecular_function (1); transcription factor activity, sequence-specific DNA binding [GO:0003700] molecular_function (1); regulation of transcription, DNA-templated [GO:0006355] biological_process (1)                                                                                  | AP2/ERF domain [IPRO01471] (1); DNA-binding domain [IPRO16177] (1)                                                                                                                                                                                                                                                                                                                               | -                          | C_umhiu_00491_mRNA_19.1 | -                    |
| GF0037511 | 0                      | 1               | 0                | Hypothetical protein (1)                                |                                                                                                                                                                                                                                                                                                                    |                                                                                                                                                                                                                                                                                                                                                                                                  | -                          | C_umhiu_00491_mRNA_18.1 | -                    |
| GF0037510 | 0                      | 1               | 0                | Hypothetical protein (1)                                |                                                                                                                                                                                                                                                                                                                    |                                                                                                                                                                                                                                                                                                                                                                                                  | -                          | C_umhiu_00491_mRNA_16.1 | -                    |
| GF0037509 | 0                      | 1               | 0                | Hypothetical protein (1)                                | heme binding [GO:0020037] molecular_function (1); response to oxidative stress [GO:0006979] biological_process (1); peroxidase activity [GO:0004601] molecular_function (1); oxidation-reduction process [GO:0055114] biological_process (1)                                                                       | Haem peroxidase [IPRO10255] (1); Haem peroxidase, plant/fungal/bacterial [IPRO20161] (1); Plant peroxidase [IPRO08221] (1)                                                                                                                                                                                                                                                                       | -                          | C_umhiu_00491_mRNA_12.1 | -                    |
| GF0037508 | 0                      | 1               | 0                | Hypothetical protein (1)                                |                                                                                                                                                                                                                                                                                                                    |                                                                                                                                                                                                                                                                                                                                                                                                  | -                          | C_umhiu_00491_mRNA_10.1 | -                    |
| GF0037507 | 0                      | 1               | 0                | Hypothetical protein (1)                                |                                                                                                                                                                                                                                                                                                                    |                                                                                                                                                                                                                                                                                                                                                                                                  | -                          | C_umhiu_00490_mRNA_8.1  | -                    |
| GF0037506 | 0                      | 1               | 0                | Nucleosome assembly protein (1)                         | nucleus [GO:0005634] cellular_component (1); nucleosome assembly [GO:0006334] biological_process (1)                                                                                                                                                                                                               | Nucleosome assembly protein (NAP) [IPRO02164] (1)                                                                                                                                                                                                                                                                                                                                                | -                          | C_umhiu_00490_mRNA_23.1 | -                    |
| GF0037505 | 0                      | 1               | 0                | Hypothetical protein (1)                                |                                                                                                                                                                                                                                                                                                                    |                                                                                                                                                                                                                                                                                                                                                                                                  | -                          | C_umhiu_00490_mRNA_1.1  | -                    |
| GF0037504 | 0                      | 1               | 0                | Hypothetical protein (1)                                |                                                                                                                                                                                                                                                                                                                    |                                                                                                                                                                                                                                                                                                                                                                                                  | -                          | C_umhiu_00489_mRNA_8.1  | -                    |
| GF0037503 | 0                      | 1               | 0                | Hypothetical protein (1)                                |                                                                                                                                                                                                                                                                                                                    |                                                                                                                                                                                                                                                                                                                                                                                                  | -                          | C_umhiu_00489_mRNA_7.1  | -                    |
| GF0037502 | 0                      | 1               | 0                | Hypothetical protein (1)                                |                                                                                                                                                                                                                                                                                                                    |                                                                                                                                                                                                                                                                                                                                                                                                  | -                          | C_umhiu_00489_mRNA_18.1 | -                    |
| GF0037501 | 0                      | 1               | 0                | Hypothetical protein (1)                                |                                                                                                                                                                                                                                                                                                                    |                                                                                                                                                                                                                                                                                                                                                                                                  | -                          | C_umhiu_00489_mRNA_13.1 | -                    |
| GF0037500 | 0                      | 1               | 0                | CDNA clone:002-110-H12, full insert sequence (1)        | nucleic acid binding [GO:0003676] molecular_function (1)                                                                                                                                                                                                                                                           | Ribonuclease H-like domain [IPRO12337] (1)                                                                                                                                                                                                                                                                                                                                                       | -                          | C_umhiu_00489_mRNA_1.1  | -                    |
| GF0037499 | 0                      | 1               | 0                | Hypothetical protein (1)                                |                                                                                                                                                                                                                                                                                                                    |                                                                                                                                                                                                                                                                                                                                                                                                  | -                          | C_umhiu_00488_mRNA_26.1 | -                    |
| GF0037498 | 0                      | 1               | 0                | Hypothetical protein (1)                                |                                                                                                                                                                                                                                                                                                                    |                                                                                                                                                                                                                                                                                                                                                                                                  | -                          | C_umhiu_00488_mRNA_25.1 | -                    |
| GF0037497 | 0                      | 1               | 0                | Hypothetical protein (1)                                |                                                                                                                                                                                                                                                                                                                    |                                                                                                                                                                                                                                                                                                                                                                                                  | -                          | C_umhiu_00487_mRNA_9.1  | -                    |
| GF0037496 | 0                      | 1               | 0                | Hypothetical protein (1)                                |                                                                                                                                                                                                                                                                                                                    |                                                                                                                                                                                                                                                                                                                                                                                                  | -                          | C_umhiu_00487_mRNA_8.1  | -                    |
| GF0037495 | 0                      | 1               | 0                | Hypothetical protein (1)                                |                                                                                                                                                                                                                                                                                                                    |                                                                                                                                                                                                                                                                                                                                                                                                  | -                          | C_umhiu_00487_mRNA_7.1  | -                    |
| GF0037494 | 0                      | 1               | 0                | Hypothetical protein (1)                                |                                                                                                                                                                                                                                                                                                                    |                                                                                                                                                                                                                                                                                                                                                                                                  | -                          | C_umhiu_00487_mRNA_5.1  | -                    |
| GF0037493 | 0                      | 1               | 0                | Pis v 1 allergen 2S albumin (1)                         |                                                                                                                                                                                                                                                                                                                    |                                                                                                                                                                                                                                                                                                                                                                                                  | -                          | C_umhiu_00487_mRNA_3.1  | -                    |
| GF0037492 | 0                      | 1               | 0                | Hypothetical protein (1)                                |                                                                                                                                                                                                                                                                                                                    |                                                                                                                                                                                                                                                                                                                                                                                                  | -                          | C_umhiu_00487_mRNA_22.1 | -                    |
| GF0037491 | 0                      | 1               | 0                | Hypothetical protein (1)                                |                                                                                                                                                                                                                                                                                                                    |                                                                                                                                                                                                                                                                                                                                                                                                  | -                          | C_umhiu_00486_mRNA_4.1  | -                    |
| GF0037490 | 0                      | 1               | 0                | Hypothetical protein (1)                                |                                                                                                                                                                                                                                                                                                                    |                                                                                                                                                                                                                                                                                                                                                                                                  | -                          | C_umhiu_00486_mRNA_15.1 | -                    |



| ID        | Num. in C. crottensteini | Num. in C. auris | Num. in P. putida | Note                                                            | GO                                                                                                                                                                                                                               | InterPro                                                                                                                                                                                                                                                                                                                                                                                                                                                                                                                                                                              | Members in C. crottensteini | Members in C. auris     | Members in P. putida |
|-----------|--------------------------|------------------|-------------------|-----------------------------------------------------------------|----------------------------------------------------------------------------------------------------------------------------------------------------------------------------------------------------------------------------------|---------------------------------------------------------------------------------------------------------------------------------------------------------------------------------------------------------------------------------------------------------------------------------------------------------------------------------------------------------------------------------------------------------------------------------------------------------------------------------------------------------------------------------------------------------------------------------------|-----------------------------|-------------------------|----------------------|
| GF0037402 | 0                        | 1                | 1                 | 0 Hypothetical protein (1)                                      |                                                                                                                                                                                                                                  |                                                                                                                                                                                                                                                                                                                                                                                                                                                                                                                                                                                       |                             | C_unihh_00470_mRNA_33.1 | -                    |
| GF0037401 | 0                        | 1                | 1                 | 0 Hypothetical protein (1)                                      |                                                                                                                                                                                                                                  |                                                                                                                                                                                                                                                                                                                                                                                                                                                                                                                                                                                       |                             | C_unihh_00470_mRNA_32.1 | -                    |
| GF0037400 | 0                        | 1                | 1                 | 0 Hypothetical protein (1)                                      |                                                                                                                                                                                                                                  |                                                                                                                                                                                                                                                                                                                                                                                                                                                                                                                                                                                       |                             | C_unihh_00470_mRNA_3.1  | -                    |
| GF0037399 | 0                        | 1                | 1                 | 0 Hypothetical protein (1)                                      |                                                                                                                                                                                                                                  |                                                                                                                                                                                                                                                                                                                                                                                                                                                                                                                                                                                       |                             | C_unihh_00470_mRNA_23.1 | -                    |
| GF0037398 | 0                        | 1                | 1                 | 0 Hypothetical protein (1)                                      |                                                                                                                                                                                                                                  |                                                                                                                                                                                                                                                                                                                                                                                                                                                                                                                                                                                       |                             | C_unihh_00470_mRNA_2.1  | -                    |
| GF0037397 | 0                        | 1                | 1                 | 0 Hypothetical protein (1)                                      |                                                                                                                                                                                                                                  |                                                                                                                                                                                                                                                                                                                                                                                                                                                                                                                                                                                       |                             | C_unihh_00470_mRNA_19.1 | -                    |
| GF0037396 | 0                        | 1                | 1                 | 0 Hypothetical protein (1)                                      |                                                                                                                                                                                                                                  |                                                                                                                                                                                                                                                                                                                                                                                                                                                                                                                                                                                       |                             | C_unihh_00470_mRNA_18.1 | -                    |
| GF0037395 | 0                        | 1                | 1                 | 0 Hypothetical protein (1)                                      |                                                                                                                                                                                                                                  |                                                                                                                                                                                                                                                                                                                                                                                                                                                                                                                                                                                       |                             | C_unihh_00470_mRNA_16.1 | -                    |
| GF0037394 | 0                        | 1                | 1                 | 0 Hypothetical protein (1)                                      |                                                                                                                                                                                                                                  | Aspartic peptidase domain [IPRO21109] (1); Reverse transcriptase domain [IPRO06477] (4)                                                                                                                                                                                                                                                                                                                                                                                                                                                                                               |                             | C_unihh_00470_mRNA_15.1 | -                    |
| GF0037393 | 0                        | 1                | 1                 | 0 Hypothetical protein (1)                                      |                                                                                                                                                                                                                                  | Viral movement protein [IPRO28919] (1)                                                                                                                                                                                                                                                                                                                                                                                                                                                                                                                                                |                             | C_unihh_00470_mRNA_12.1 | -                    |
| GF0037392 | 0                        | 1                | 1                 | 0 Hypothetical protein (1)                                      |                                                                                                                                                                                                                                  | Transposon, Eu-Spm-like [IPRO04242] (1)                                                                                                                                                                                                                                                                                                                                                                                                                                                                                                                                               |                             | C_unihh_00469_mRNA_8.1  | -                    |
| GF0037391 | 0                        | 1                | 1                 | 0 Polys-specific C2 domain containing protein (1)               | protein binding [GO:005515 molecular_function] (1)                                                                                                                                                                               | C2 domain [IPRO00008] (1)                                                                                                                                                                                                                                                                                                                                                                                                                                                                                                                                                             |                             | C_unihh_00469_mRNA_7.1  | -                    |
| GF0037390 | 0                        | 1                | 1                 | 0 Hypothetical protein (1)                                      |                                                                                                                                                                                                                                  |                                                                                                                                                                                                                                                                                                                                                                                                                                                                                                                                                                                       |                             | C_unihh_00469_mRNA_2.1  | -                    |
| GF0037389 | 0                        | 1                | 1                 | 0 BED zinc finger, hAT family dimerization domain isoform 5 (1) | protein dimerization activity [GO:0046983 molecular_function] (1); nucleic acid binding [GO:0003676 molecular_function] (1); DNA binding [GO:0003677 molecular_function] (1); protein binding [GO:005515 molecular_function] (1) | HAT, C-terminal dimerization domain [IPRO08906] (1); Zinc finger, BED-type [IPRO08606] (1); C2 domain [IPRO00008] (1); Ribonuclease H-like domain [IPRO12337] (1)                                                                                                                                                                                                                                                                                                                                                                                                                     |                             | C_unihh_00469_mRNA_13.1 | -                    |
| GF0037388 | 0                        | 1                | 1                 | 0 Hypothetical protein (1)                                      |                                                                                                                                                                                                                                  |                                                                                                                                                                                                                                                                                                                                                                                                                                                                                                                                                                                       |                             | C_unihh_00469_mRNA_1.1  | -                    |
| GF0037387 | 0                        | 1                | 1                 | 0 Guanylate kinase (1)                                          | purine nucleotide metabolic process [GO:0006163 biological_process] (1); guanylate kinase activity [GO:0004385 molecular_function] (1)                                                                                           | Guanylate kinase, conserved site [IPRO25901] (1); Guanylate kinase [IPRO17665] (1); Guanylate kinase-L-type calcium channel beta subunit [IPRO08145] (1); P-loop containing nucleoside triphosphate hydrolase [IPRO27417] (1); Guanylate kinase-like domain [IPRO01441] (1)                                                                                                                                                                                                                                                                                                           |                             | C_unihh_00468_mRNA_29.1 | -                    |
| GF0037386 | 0                        | 1                | 1                 | 0 Hypothetical protein (1)                                      |                                                                                                                                                                                                                                  |                                                                                                                                                                                                                                                                                                                                                                                                                                                                                                                                                                                       |                             | C_unihh_00468_mRNA_26.1 | -                    |
| GF0037385 | 0                        | 1                | 1                 | 0 Hypothetical protein (1)                                      |                                                                                                                                                                                                                                  |                                                                                                                                                                                                                                                                                                                                                                                                                                                                                                                                                                                       |                             | C_unihh_00468_mRNA_23.1 | -                    |
| GF0037384 | 0                        | 1                | 1                 | 0 Hypothetical protein (1)                                      | regulation of transcription, DNA-templated [GO:0006355 biological_process] (1)                                                                                                                                                   | FH1Y3FAR1 family [IPRO11052] (1)                                                                                                                                                                                                                                                                                                                                                                                                                                                                                                                                                      |                             | C_unihh_00468_mRNA_21.1 | -                    |
| GF0037383 | 0                        | 1                | 1                 | 0 Hypothetical protein (1)                                      |                                                                                                                                                                                                                                  |                                                                                                                                                                                                                                                                                                                                                                                                                                                                                                                                                                                       |                             | C_unihh_00468_mRNA_12.1 | -                    |
| GF0037382 | 0                        | 1                | 1                 | 0 Non-LTR retroelement reverse transcriptase-like (1)           | nucleic acid binding [GO:0003676 molecular_function] (1)                                                                                                                                                                         | Reverse transcriptase zinc-binding domain [IPRO26960] (1); Ribonuclease H-like domain [IPRO12337] (1)                                                                                                                                                                                                                                                                                                                                                                                                                                                                                 |                             | C_unihh_00468_mRNA_10.1 | -                    |
| GF0037381 | 0                        | 1                | 1                 | 0 Hypothetical protein (1)                                      |                                                                                                                                                                                                                                  | Reverse transcriptase domain [IPRO00477] (1)                                                                                                                                                                                                                                                                                                                                                                                                                                                                                                                                          |                             | C_unihh_00467_mRNA_6.1  | -                    |
| GF0037380 | 0                        | 1                | 1                 | 0 Hypothetical protein (1)                                      |                                                                                                                                                                                                                                  |                                                                                                                                                                                                                                                                                                                                                                                                                                                                                                                                                                                       |                             | C_unihh_00467_mRNA_5.1  | -                    |
| GF0037379 | 0                        | 1                | 1                 | 0 Hypothetical protein (1)                                      | carion transport [GO:0006812 biological_process] (1); integral component of membrane [GO:0016021 cellular_component] (1); solute:proton antiporter activity [GO:0015299 molecular_function] (1)                                  | Cation H <sup>+</sup> exchanger, CPA1 family [IPRO19422] (1)                                                                                                                                                                                                                                                                                                                                                                                                                                                                                                                          |                             | C_unihh_00467_mRNA_3.1  | -                    |
| GF0037378 | 0                        | 1                | 1                 | 0 Hypothetical protein (1)                                      |                                                                                                                                                                                                                                  |                                                                                                                                                                                                                                                                                                                                                                                                                                                                                                                                                                                       |                             | C_unihh_00467_mRNA_20.1 | -                    |
| GF0037377 | 0                        | 1                | 1                 | 0 Hypothetical protein (1)                                      |                                                                                                                                                                                                                                  | Gsk2-homologous domain [IPRO2902] (1)                                                                                                                                                                                                                                                                                                                                                                                                                                                                                                                                                 |                             | C_unihh_00467_mRNA_2.1  | -                    |
| GF0037376 | 0                        | 1                | 1                 | 0 Hypothetical protein (1)                                      |                                                                                                                                                                                                                                  |                                                                                                                                                                                                                                                                                                                                                                                                                                                                                                                                                                                       |                             | C_unihh_00467_mRNA_19.1 | -                    |
| GF0037375 | 0                        | 1                | 1                 | 0 Hypothetical protein (1)                                      |                                                                                                                                                                                                                                  |                                                                                                                                                                                                                                                                                                                                                                                                                                                                                                                                                                                       |                             | C_unihh_00467_mRNA_18.1 | -                    |
| GF0037374 | 0                        | 1                | 1                 | 0 Hypothetical protein (1)                                      |                                                                                                                                                                                                                                  |                                                                                                                                                                                                                                                                                                                                                                                                                                                                                                                                                                                       |                             | C_unihh_00467_mRNA_17.1 | -                    |
| GF0037373 | 0                        | 1                | 1                 | 0 Hypothetical protein (1)                                      |                                                                                                                                                                                                                                  |                                                                                                                                                                                                                                                                                                                                                                                                                                                                                                                                                                                       |                             | C_unihh_00467_mRNA_16.1 | -                    |
| GF0037372 | 0                        | 1                | 1                 | 0 Hypothetical protein (1)                                      |                                                                                                                                                                                                                                  | Major facilitator superfamily domain [IPRO25040] (1)                                                                                                                                                                                                                                                                                                                                                                                                                                                                                                                                  |                             | C_unihh_00467_mRNA_13.1 | -                    |
| GF0037371 | 0                        | 1                | 1                 | 0 Hypothetical protein (1)                                      | protein serine/threonine kinase activity [GO:0004674 molecular_function] (1)                                                                                                                                                     | S-locus receptor kinase, C-terminal [IPRO21820] (1)                                                                                                                                                                                                                                                                                                                                                                                                                                                                                                                                   |                             | C_unihh_00467_mRNA_10.1 | -                    |
| GF0037370 | 0                        | 1                | 1                 | 0 Hypothetical protein (1)                                      |                                                                                                                                                                                                                                  |                                                                                                                                                                                                                                                                                                                                                                                                                                                                                                                                                                                       |                             | C_unihh_00467_mRNA_1.1  | -                    |
| GF0037369 | 0                        | 1                | 1                 | 0 Hypothetical protein (1)                                      |                                                                                                                                                                                                                                  |                                                                                                                                                                                                                                                                                                                                                                                                                                                                                                                                                                                       |                             | C_unihh_00466_mRNA_19.1 | -                    |
| GF0037368 | 0                        | 1                | 1                 | 0 Hypothetical protein (1)                                      |                                                                                                                                                                                                                                  |                                                                                                                                                                                                                                                                                                                                                                                                                                                                                                                                                                                       |                             | C_unihh_00466_mRNA_18.1 | -                    |
| GF0037367 | 0                        | 1                | 1                 | 0 Glyceraldehyde 3-phosphate dehydrogenase 1, cytosolic (1)     | oxidation-reduction process [GO:005114 biological_process] (1); endocholesterase activity, acting on the aldehyde or oxo group of donors, NAD as NADP as acceptor [GO:0016620 molecular_function] (1)                            | Glyceraldehyde 3-phosphate dehydrogenase, catalytic domain [IPRO20292] (1); Glyceraldehyde 3-phosphate dehydrogenase, NAD(P) binding domain [IPRO20828] (1); Glyceraldehyde 3-phosphate dehydrogenase, active site [IPRO20830] (1); Glyceraldehyde 3-phosphate dehydrogenase family [IPRO08311] (1); NAD(P)-binding domain [IPRO16040] (1)                                                                                                                                                                                                                                            |                             | C_unihh_00466_mRNA_15.1 | -                    |
| GF0037366 | 0                        | 1                | 1                 | 0 Hypothetical protein (1)                                      |                                                                                                                                                                                                                                  | Domain of unknown function DUF4283 [IPRO25558] (4)                                                                                                                                                                                                                                                                                                                                                                                                                                                                                                                                    |                             | C_unihh_00466_mRNA_11.1 | -                    |
| GF0037365 | 0                        | 1                | 1                 | 0 Hypothetical protein (1)                                      |                                                                                                                                                                                                                                  |                                                                                                                                                                                                                                                                                                                                                                                                                                                                                                                                                                                       |                             | C_unihh_00464_mRNA_4.1  | -                    |
| GF0037364 | 0                        | 1                | 1                 | 0 Hypothetical protein (1)                                      |                                                                                                                                                                                                                                  |                                                                                                                                                                                                                                                                                                                                                                                                                                                                                                                                                                                       |                             | C_unihh_00464_mRNA_20.1 | -                    |
| GF0037363 | 0                        | 1                | 1                 | 0 Hypothetical protein (1)                                      |                                                                                                                                                                                                                                  |                                                                                                                                                                                                                                                                                                                                                                                                                                                                                                                                                                                       |                             | C_unihh_00464_mRNA_2.1  | -                    |
| GF0037362 | 0                        | 1                | 1                 | 0 Hypothetical protein (1)                                      |                                                                                                                                                                                                                                  |                                                                                                                                                                                                                                                                                                                                                                                                                                                                                                                                                                                       |                             | C_unihh_00464_mRNA_17.1 | -                    |
| GF0037361 | 0                        | 1                | 1                 | 0 Hypothetical protein (1)                                      |                                                                                                                                                                                                                                  |                                                                                                                                                                                                                                                                                                                                                                                                                                                                                                                                                                                       |                             | C_unihh_00464_mRNA_10.1 | -                    |
| GF0037360 | 0                        | 1                | 1                 | 0 Hypothetical protein (1)                                      |                                                                                                                                                                                                                                  | Transposon, Top1/Eu-Spm-like [IPRO04264] (1)                                                                                                                                                                                                                                                                                                                                                                                                                                                                                                                                          |                             | C_unihh_00464_mRNA_1.1  | -                    |
| GF0037359 | 0                        | 1                | 1                 | 0 Hypothetical protein (1)                                      |                                                                                                                                                                                                                                  |                                                                                                                                                                                                                                                                                                                                                                                                                                                                                                                                                                                       |                             | C_unihh_00463_mRNA_8.1  | -                    |
| GF0037358 | 0                        | 1                | 1                 | 0 Hypothetical protein (1)                                      | transferase activity, transferring acyl groups other than amino-acyl groups [GO:0016747 molecular_function] (1)                                                                                                                  | Chloramphenicol acetyltransferase-like domain [IPRO21311] (1); Rib-type lectin domain [IPRO01480] (1); Transferase [IPRO03480] (4)                                                                                                                                                                                                                                                                                                                                                                                                                                                    |                             | C_unihh_00463_mRNA_3.1  | -                    |
| GF0037357 | 0                        | 1                | 1                 | 0 Hypothetical protein (1)                                      |                                                                                                                                                                                                                                  |                                                                                                                                                                                                                                                                                                                                                                                                                                                                                                                                                                                       |                             | C_unihh_00463_mRNA_20.1 | -                    |
| GF0037356 | 0                        | 1                | 1                 | 0 Hypothetical protein (1)                                      |                                                                                                                                                                                                                                  |                                                                                                                                                                                                                                                                                                                                                                                                                                                                                                                                                                                       |                             | C_unihh_00463_mRNA_14.1 | -                    |
| GF0037355 | 0                        | 1                | 1                 | 0 Hypothetical protein (1)                                      |                                                                                                                                                                                                                                  |                                                                                                                                                                                                                                                                                                                                                                                                                                                                                                                                                                                       |                             | C_unihh_00462_mRNA_7.1  | -                    |
| GF0037354 | 0                        | 1                | 1                 | 0 Hypothetical protein (1)                                      |                                                                                                                                                                                                                                  |                                                                                                                                                                                                                                                                                                                                                                                                                                                                                                                                                                                       |                             | C_unihh_00462_mRNA_3.1  | -                    |
| GF0037353 | 0                        | 1                | 1                 | 0 Hypothetical protein (1)                                      |                                                                                                                                                                                                                                  | Protein kinase-like domain [IPRO11009] (1); Leucine-rich repeat domain, L domain-like [IPRO26751] (1); Thioesteron-like fold [IPRO12336] (1); Protein kinase domain [IPRO00719] (1); Glutathione S-transferase, N-terminal [IPRO04045] (1); Serine-threonine-tyrosine-protein kinase catalytic domain [IPRO01245] (1); Protein kinase, ATP binding site [IPRO17451] (1); Serine-threonine-protein kinase, active site [IPRO08271] (1); Glutathione S-transferase, C-terminal-like [IPRO10987] (1); Serine-threonine-dual specificity protein kinase, catalytic domain [IPRO02290] (1) |                             | C_unihh_00460_mRNA_9.1  | -                    |
| GF0037352 | 0                        | 1                | 1                 | 0 Hypothetical protein (1)                                      | protein binding [GO:005515 molecular_function] (1); protein kinase activity [GO:0004672 molecular_function] (1); protein phosphorylation [GO:0006468 biological_process] (1); ATP binding [GO:0005524 molecular_function] (1)    | Protein kinase-like domain [IPRO11009] (1); Leucine-rich repeat domain, L domain-like [IPRO26751] (1); Thioesteron-like fold [IPRO12336] (1); Protein kinase domain [IPRO00719] (1); Glutathione S-transferase, N-terminal [IPRO04045] (1); Serine-threonine-tyrosine-protein kinase catalytic domain [IPRO01245] (1); Protein kinase, ATP binding site [IPRO17451] (1); Serine-threonine-protein kinase, active site [IPRO08271] (1); Glutathione S-transferase, C-terminal-like [IPRO10987] (1); Serine-threonine-dual specificity protein kinase, catalytic domain [IPRO02290] (1) |                             | C_unihh_00460_mRNA_8.1  | -                    |
| GF0037351 | 0                        | 1                | 1                 | 0 Hypothetical protein (1)                                      | protein binding [GO:005515 molecular_function] (1)                                                                                                                                                                               | Tetratricopeptide repeat [IPRO19734] (1); Tetratricopeptide repeat-containing domain [IPRO13026] (1); Tetratricopeptide-like helical domain [IPRO11901] (1)                                                                                                                                                                                                                                                                                                                                                                                                                           |                             | C_unihh_00460_mRNA_7.1  | -                    |
| GF0037350 | 0                        | 1                | 1                 | 0 LRR receptor-like kinase family protein (1)                   | protein binding [GO:005515 molecular_function] (1)                                                                                                                                                                               | Leucine-rich repeat, typical subtype [IPRO05991] (1); Leucine-rich repeat domain, L domain-like [IPRO26751] (1); Leucine-rich repeat [IPRO01611] (1); Leucine-rich repeat-containing N-terminal, plant-type [IPRO13101] (1)                                                                                                                                                                                                                                                                                                                                                           |                             | C_unihh_00460_mRNA_6.1  | -                    |
| GF0037349 | 0                        | 1                | 1                 | 0 Glutathione transferase (1)                                   | protein binding [GO:005515 molecular_function] (1)                                                                                                                                                                               | Glutathione S-transferase, C-terminal-like [IPRO10987] (1); Glutathione S-transferase, N-terminal [IPRO04045] (1); Thioesteron-like fold [IPRO12336] (1); Glutathione S-transferase, C-terminal [IPRO04046] (1)                                                                                                                                                                                                                                                                                                                                                                       |                             | C_unihh_00460_mRNA_5.1  | -                    |
| GF0037348 | 0                        | 1                | 1                 | 0 Hypothetical protein (1)                                      |                                                                                                                                                                                                                                  |                                                                                                                                                                                                                                                                                                                                                                                                                                                                                                                                                                                       |                             | C_unihh_00460_mRNA_4.1  | -                    |
| GF0037347 | 0                        | 1                | 1                 | 0 Hypothetical protein (1)                                      |                                                                                                                                                                                                                                  |                                                                                                                                                                                                                                                                                                                                                                                                                                                                                                                                                                                       |                             | C_unihh_00460_mRNA_32.1 | -                    |
| GF0037346 | 0                        | 1                | 1                 | 0 LRR receptor-like kinase family protein (1)                   | protein phosphorylation [GO:0006468 biological_process] (1); protein kinase activity [GO:0004672 molecular_function] (1); ATP binding [GO:0005524 molecular_function] (1); protein binding [GO:005515 molecular_function] (1)    | Protein kinase, ATP binding site [IPRO17451] (1); Serine-threonine-tyrosine-protein kinase catalytic domain [IPRO01245] (1); Leucine-rich repeat [IPRO01611] (1); Conserved A-like lectin/glucanase domain [IPRO13320] (1); Protein kinase-like domain [IPRO11009] (1); Leucine-rich repeat domain, L domain-like [IPRO26751] (1)                                                                                                                                                                                                                                                     |                             | C_unihh_00460_mRNA_23.1 | -                    |
| GF0037345 | 0                        | 1                | 1                 | 0 Hypothetical protein (1)                                      |                                                                                                                                                                                                                                  |                                                                                                                                                                                                                                                                                                                                                                                                                                                                                                                                                                                       |                             | C_unihh_00460_mRNA_20.1 | -                    |
| GF0037344 | 0                        | 1                | 1                 | 0 Tan class glutathione S-transferase (1)                       | protein binding [GO:005515 molecular_function] (1)                                                                                                                                                                               | Glutathione S-transferase, C-terminal-like [IPRO10987] (1); Glutathione S-transferase, N-terminal [IPRO04045] (1); Thioesteron-like fold [IPRO12336] (1)                                                                                                                                                                                                                                                                                                                                                                                                                              |                             | C_unihh_00460_mRNA_2.1  | -                    |
| GF0037343 | 0                        | 1                | 1                 | 0 Tetratricopeptide repeat protein 27-like protein (1)          |                                                                                                                                                                                                                                  |                                                                                                                                                                                                                                                                                                                                                                                                                                                                                                                                                                                       |                             | C_unihh_00460_mRNA_17.1 | -                    |
| GF0037342 | 0                        | 1                | 1                 | 0 Hypothetical protein (1)                                      |                                                                                                                                                                                                                                  |                                                                                                                                                                                                                                                                                                                                                                                                                                                                                                                                                                                       |                             | C_unihh_00460_mRNA_16.1 | -                    |
| GF0037341 | 0                        | 1                | 1                 | 0 Hypothetical protein (1)                                      |                                                                                                                                                                                                                                  |                                                                                                                                                                                                                                                                                                                                                                                                                                                                                                                                                                                       |                             | C_unihh_00460_mRNA_14.1 | -                    |
| GF0037340 | 0                        | 1                | 1                 | 0 RNA-binding protein pool 1 (1)                                | nucleic acid binding [GO:0003676 molecular_function] (1); RNA binding [GO:0005723 molecular_function] (1)                                                                                                                        | K Homology domain [IPRO04087] (1); K Homology domain, type 1 [IPRO04088] (1)                                                                                                                                                                                                                                                                                                                                                                                                                                                                                                          |                             | C_unihh_00459_mRNA_3.1  | -                    |
| GF0037339 | 0                        | 1                | 1                 | 0 Hypothetical protein (1)                                      |                                                                                                                                                                                                                                  |                                                                                                                                                                                                                                                                                                                                                                                                                                                                                                                                                                                       |                             | C_unihh_00459_mRNA_22.1 | -                    |
| GF0037338 | 0                        | 1                | 1                 | 0 Hypothetical protein (1)                                      |                                                                                                                                                                                                                                  |                                                                                                                                                                                                                                                                                                                                                                                                                                                                                                                                                                                       |                             | C_unihh_00459_mRNA_21.1 | -                    |
| GF0037337 | 0                        | 1                | 1                 | 0 Hypothetical protein (1)                                      |                                                                                                                                                                                                                                  |                                                                                                                                                                                                                                                                                                                                                                                                                                                                                                                                                                                       |                             | C_unihh_00459_mRNA_16.1 | -                    |
| GF0037336 | 0                        | 1                | 1                 | 0 Hypothetical protein (1)                                      |                                                                                                                                                                                                                                  |                                                                                                                                                                                                                                                                                                                                                                                                                                                                                                                                                                                       |                             | C_unihh_00458_mRNA_6.1  | -                    |
| GF0037335 | 0                        | 1                | 1                 | 0 Monosaccharide transport protein (1)                          |                                                                                                                                                                                                                                  | ABC transporter, conserved site [IPRO17871] (1); P-loop containing nucleoside triphosphate hydrolase [IPRO27417] (1); ABC transporter-like [IPRO04349] (1); AAA-ATPase domain [IPRO03593] (4)                                                                                                                                                                                                                                                                                                                                                                                         |                             | C_unihh_00458_mRNA_5.1  | -                    |
| GF0037334 | 0                        | 1                | 1                 | 0 ATP3G21090 protein (1)                                        | ATP binding [GO:0005524 molecular_function] (1); ATPase activity [GO:0016887 molecular_function] (1)                                                                                                                             |                                                                                                                                                                                                                                                                                                                                                                                                                                                                                                                                                                                       |                             | C_unihh_00458_mRNA_13.1 | -                    |

| ID        | Num. in C. crottensteini | Num. in C. auris | Num. in P. putida | Note                                                              | GO                                                                                                                                                                                                                                                          | InterPro                                                                                                                                                                                                                                                                                                                                                         | Members in C. crottensteini | Members in C. auris     | Members in P. putida |
|-----------|--------------------------|------------------|-------------------|-------------------------------------------------------------------|-------------------------------------------------------------------------------------------------------------------------------------------------------------------------------------------------------------------------------------------------------------|------------------------------------------------------------------------------------------------------------------------------------------------------------------------------------------------------------------------------------------------------------------------------------------------------------------------------------------------------------------|-----------------------------|-------------------------|----------------------|
| GF0037333 | 0                        | 1                | 0                 | Hypothetical protein (1)                                          | phosphatidylinositol phosphate kinase activity [GO:0016307] molecular_function (1); phosphatidylinositol metabolic process [GO:0046488 biological_process] (1)                                                                                              | Phosphatidylinositol-4-phosphate 5-kinase, core [IPRO02808] (1); Phosphatidylinositol-4-phosphate 5-kinase, core, subgroup [IPRO16034] (1); Phosphatidylinositol-4-phosphate 5-kinase, C-terminal [IPRO27483] (1)                                                                                                                                                | -                           | C_ushii_00457_mRNA_35.1 | -                    |
| GF0037332 | 0                        | 1                | 0                 | Hypothetical protein (1)                                          |                                                                                                                                                                                                                                                             | Bull-type lectin domain [IPRO01480] (1); Concavomelin A-like lectin/glycosome domain [IPRO13320] (1)                                                                                                                                                                                                                                                             | -                           | C_ushii_00457_mRNA_28.1 | -                    |
| GF0037331 | 0                        | 1                | 0                 | Hypothetical protein (1)                                          |                                                                                                                                                                                                                                                             | Biotin/leicyl attachment [IPRO00089] (1); Single hybrid motif [IPRO11051] (1); 2-oxo acid dehydrogenase, lipoyl-binding site [IPRO00104] (1)                                                                                                                                                                                                                     | -                           | C_ushii_00457_mRNA_15.1 | -                    |
| GF0037329 | 0                        | 1                | 0                 | Hypothetical protein (1)                                          |                                                                                                                                                                                                                                                             |                                                                                                                                                                                                                                                                                                                                                                  | -                           | C_ushii_00456_mRNA_7.1  | -                    |
| GF0037328 | 0                        | 1                | 0                 | Hypothetical protein (1)                                          |                                                                                                                                                                                                                                                             |                                                                                                                                                                                                                                                                                                                                                                  | -                           | C_ushii_00456_mRNA_6.1  | -                    |
| GF0037327 | 0                        | 1                | 0                 | Hypothetical protein (1)                                          |                                                                                                                                                                                                                                                             |                                                                                                                                                                                                                                                                                                                                                                  | -                           | C_ushii_00456_mRNA_5.1  | -                    |
| GF0037326 | 0                        | 1                | 0                 | Ribonuclease H-like superfamily protein (1)                       | nucleic acid binding [GO:0003676 molecular_function] (1)                                                                                                                                                                                                    | Reverse transcriptase zinc-binding domain [IPRO26060] (1); Ribonuclease H-like domain [IPRO12337] (1)                                                                                                                                                                                                                                                            | -                           | C_ushii_00456_mRNA_3.1  | -                    |
| GF0037325 | 0                        | 1                | 0                 | 50S ribosomal protein L14, chloroplast (1)                        | structural constituent of ribosome [GO:0003735 molecular_function] (1); large ribosomal subunit [GO:0015934 cellular_component] (1); translation [GO:0006412 biological_process] (1); ribosome [GO:0005540 cellular_component] (1)                          | Ribosomal protein L14bL23e [IPRO00218] (1); Ribosomal protein L14, bacterial-type [IPRO07843] (1); Ribosomal protein L14 conserved site [IPRO19972] (1); Ribosomal protein L14 domain [IPRO02571] (1)                                                                                                                                                            | -                           | C_ushii_00456_mRNA_22.1 | -                    |
| GF0037324 | 0                        | 1                | 0                 | 30S ribosomal protein S11, chloroplast (1)                        | structural constituent of ribosome [GO:0003735 molecular_function] (1); intracellular [GO:0005622 cellular_component] (1); translation [GO:0006412 biological_process] (1); ribosome [GO:0005540 cellular_component] (1)                                    | Ribosomal protein S11, bacterial-type [IPRO19981] (1); Ribosomal S11, conserved site [IPRO17802] (1); Ribosomal protein S11 [IPRO1971] (1)                                                                                                                                                                                                                       | -                           | C_ushii_00456_mRNA_21.1 | -                    |
| GF0037323 | 0                        | 1                | 0                 | Hypothetical protein (1)                                          | structural constituent of ribosome [GO:0003735 molecular_function] (1); translation [GO:0006412 biological_process] (1)                                                                                                                                     | Ribosomal protein S11 [IPRO1971] (1); Ribosomal S11, conserved site [IPRO18102] (1)                                                                                                                                                                                                                                                                              | -                           | C_ushii_00456_mRNA_20.1 | -                    |
| GF0037322 | 0                        | 1                | 0                 | Hypothetical protein (1)                                          |                                                                                                                                                                                                                                                             |                                                                                                                                                                                                                                                                                                                                                                  | -                           | C_ushii_00456_mRNA_2.1  | -                    |
| GF0037321 | 0                        | 1                | 0                 | Hypothetical protein (1)                                          |                                                                                                                                                                                                                                                             |                                                                                                                                                                                                                                                                                                                                                                  | -                           | C_ushii_00456_mRNA_19.1 | -                    |
| GF0037320 | 0                        | 1                | 0                 | Hypothetical protein (1)                                          |                                                                                                                                                                                                                                                             |                                                                                                                                                                                                                                                                                                                                                                  | -                           | C_ushii_00456_mRNA_16.1 | -                    |
| GF0037319 | 0                        | 1                | 0                 | RNA-dependent RNA polymerase family protein (1)                   | RNA-directed RNA polymerase activity [GO:0003968 molecular_function] (1)                                                                                                                                                                                    | RNA-dependent RNA polymerase, eukaryotic-type [IPRO07855] (1)                                                                                                                                                                                                                                                                                                    | -                           | C_ushii_00456_mRNA_1.1  | -                    |
| GF0037318 | 0                        | 1                | 0                 | Hypothetical protein (1)                                          |                                                                                                                                                                                                                                                             |                                                                                                                                                                                                                                                                                                                                                                  | -                           | C_ushii_00455_mRNA_5.1  | -                    |
| GF0037317 | 0                        | 1                | 0                 | Hypothetical protein (1)                                          |                                                                                                                                                                                                                                                             |                                                                                                                                                                                                                                                                                                                                                                  | -                           | C_ushii_00455_mRNA_24.1 | -                    |
| GF0037316 | 0                        | 1                | 0                 | Hypothetical protein (1)                                          |                                                                                                                                                                                                                                                             |                                                                                                                                                                                                                                                                                                                                                                  | -                           | C_ushii_00455_mRNA_23.1 | -                    |
| GF0037315 | 0                        | 1                | 0                 | Hypothetical protein (1)                                          |                                                                                                                                                                                                                                                             |                                                                                                                                                                                                                                                                                                                                                                  | -                           | C_ushii_00455_mRNA_19.1 | -                    |
| GF0037314 | 0                        | 1                | 0                 | Protein WALLS ARE THIN 1 (1)                                      | integral component of membrane [GO:0016021 cellular_component] (1); membrane [GO:0001602 cellular_component] (1); transmembrane transporter activity [GO:0022857 molecular_function] (1)                                                                    | WAT1-related protein [IPRO30184] (1); EamA domain [IPRO00620] (1)                                                                                                                                                                                                                                                                                                | -                           | C_ushii_00455_mRNA_14.1 | -                    |
| GF0037313 | 0                        | 1                | 0                 | Hypothetical protein (1)                                          |                                                                                                                                                                                                                                                             |                                                                                                                                                                                                                                                                                                                                                                  | -                           | C_ushii_00454_mRNA_7.1  | -                    |
| GF0037312 | 0                        | 1                | 0                 | ChcAn endo-1,3-beta-glucosidase, basic form (1)                   | hydrolase activity, hydrolyzing O-glycosyl compounds [GO:0004652 molecular_function] (1); carbohydrate metabolic process [GO:0005975 biological_process] (1)                                                                                                | Glycoside hydrolase, catalytic domain [IPRO13781] (1); Glycoside hydrolase superfamily [IPRO17853] (1); Glycoside hydrolase family 17 [IPRO00490] (1)                                                                                                                                                                                                            | -                           | C_ushii_00454_mRNA_4.1  | -                    |
| GF0037311 | 0                        | 1                | 0                 | Hypothetical protein (1)                                          |                                                                                                                                                                                                                                                             |                                                                                                                                                                                                                                                                                                                                                                  | -                           | C_ushii_00454_mRNA_2.1  | -                    |
| GF0037310 | 0                        | 1                | 0                 | Hypothetical protein (1)                                          |                                                                                                                                                                                                                                                             |                                                                                                                                                                                                                                                                                                                                                                  | -                           | C_ushii_00454_mRNA_13.1 | -                    |
| GF0037309 | 0                        | 1                | 0                 | Hypothetical protein (1)                                          |                                                                                                                                                                                                                                                             |                                                                                                                                                                                                                                                                                                                                                                  | -                           | C_ushii_00454_mRNA_11.1 | -                    |
| GF0037308 | 0                        | 1                | 0                 | Disease resistance protein (1)                                    | ADP binding [GO:0043531 molecular_function] (1)                                                                                                                                                                                                             | Leucine-rich repeat domain, I domain-like [IPRO22675] (1); P-loop containing nucleoside triphosphate hydrolase [IPRO27417] (1); AAA+ ATPase domain [IPRO03593] (1); NB-ARC [IPRO02182] (1)                                                                                                                                                                       | -                           | C_ushii_00453_mRNA_27.1 | -                    |
| GF0037307 | 0                        | 1                | 0                 | Hypothetical protein (1)                                          | ADP binding [GO:0043531 molecular_function] (1)                                                                                                                                                                                                             | P-loop containing nucleoside triphosphate hydrolase [IPRO27417] (1); NB-ARC [IPRO02182] (1)                                                                                                                                                                                                                                                                      | -                           | C_ushii_00453_mRNA_26.1 | -                    |
| GF0037306 | 0                        | 1                | 0                 | Hypothetical protein (1)                                          |                                                                                                                                                                                                                                                             |                                                                                                                                                                                                                                                                                                                                                                  | -                           | C_ushii_00453_mRNA_23.1 | -                    |
| GF0037305 | 0                        | 1                | 0                 | Hypothetical protein (1)                                          |                                                                                                                                                                                                                                                             | Aspartic peptidase domain [IPRO21109] (1)                                                                                                                                                                                                                                                                                                                        | -                           | C_ushii_00453_mRNA_20.1 | -                    |
| GF0037304 | 0                        | 1                | 0                 | Putative non-LTR retrotransposon reverse transcriptase (1)        | RNA:DNA hybrid ribonuclease activity [GO:0004523 molecular_function] (1); nucleic acid binding [GO:0003676 molecular_function] (1)                                                                                                                          | Ribonuclease H-like domain [IPRO12337] (1); Reverse transcriptase zinc-binding domain [IPRO29960] (1); Ribonuclease H domain [IPRO02156] (1)                                                                                                                                                                                                                     | -                           | C_ushii_00453_mRNA_17.1 | -                    |
| GF0037303 | 0                        | 1                | 0                 | Disease resistance protein (CC-NBS-LRR class) family protein (1)  | ADP binding [GO:0043531 molecular_function] (1)                                                                                                                                                                                                             | Leucine-rich repeat domain, I domain-like [IPRO22675] (1); P-loop containing nucleoside triphosphate hydrolase [IPRO27417] (1); NB-ARC [IPRO02182] (1)                                                                                                                                                                                                           | -                           | C_ushii_00453_mRNA_16.1 | -                    |
| GF0037302 | 0                        | 1                | 0                 | Hypothetical protein (1)                                          |                                                                                                                                                                                                                                                             |                                                                                                                                                                                                                                                                                                                                                                  | -                           | C_ushii_00453_mRNA_14.1 | -                    |
| GF0037301 | 0                        | 1                | 0                 | Hypothetical protein (1)                                          |                                                                                                                                                                                                                                                             |                                                                                                                                                                                                                                                                                                                                                                  | -                           | C_ushii_00453_mRNA_1.1  | -                    |
| GF0037300 | 0                        | 1                | 0                 | Hypothetical protein (1)                                          |                                                                                                                                                                                                                                                             |                                                                                                                                                                                                                                                                                                                                                                  | -                           | C_ushii_00452_mRNA_7.1  | -                    |
| GF0037299 | 0                        | 1                | 0                 | Hypothetical protein (1)                                          |                                                                                                                                                                                                                                                             |                                                                                                                                                                                                                                                                                                                                                                  | -                           | C_ushii_00452_mRNA_4.1  | -                    |
| GF0037298 | 0                        | 1                | 0                 | Hypothetical protein (1)                                          |                                                                                                                                                                                                                                                             |                                                                                                                                                                                                                                                                                                                                                                  | -                           | C_ushii_00452_mRNA_37.1 | -                    |
| GF0037297 | 0                        | 1                | 0                 | Hypothetical protein (1)                                          |                                                                                                                                                                                                                                                             |                                                                                                                                                                                                                                                                                                                                                                  | -                           | C_ushii_00452_mRNA_35.1 | -                    |
| GF0037296 | 0                        | 1                | 0                 | Hypothetical protein (1)                                          |                                                                                                                                                                                                                                                             |                                                                                                                                                                                                                                                                                                                                                                  | -                           | C_ushii_00452_mRNA_32.1 | -                    |
| GF0037295 | 0                        | 1                | 0                 | Hypothetical protein (1)                                          |                                                                                                                                                                                                                                                             |                                                                                                                                                                                                                                                                                                                                                                  | -                           | C_ushii_00452_mRNA_24.1 | -                    |
| GF0037294 | 0                        | 1                | 0                 | Hypothetical protein (1)                                          |                                                                                                                                                                                                                                                             |                                                                                                                                                                                                                                                                                                                                                                  | -                           | C_ushii_00452_mRNA_2.1  | -                    |
| GF0037293 | 0                        | 1                | 0                 | Hypothetical protein (1)                                          |                                                                                                                                                                                                                                                             |                                                                                                                                                                                                                                                                                                                                                                  | -                           | C_ushii_00452_mRNA_13.1 | -                    |
| GF0037292 | 0                        | 1                | 0                 | Hypothetical protein (1)                                          |                                                                                                                                                                                                                                                             |                                                                                                                                                                                                                                                                                                                                                                  | -                           | C_ushii_00452_mRNA_11.1 | -                    |
| GF0037291 | 0                        | 1                | 0                 | Hypothetical protein (1)                                          |                                                                                                                                                                                                                                                             |                                                                                                                                                                                                                                                                                                                                                                  | -                           | C_ushii_00451_mRNA_9.1  | -                    |
| GF0037290 | 0                        | 1                | 0                 | NBS-LRR type disease resistance protein (1)                       | ADP binding [GO:0043531 molecular_function] (1)                                                                                                                                                                                                             | Leucine-rich repeat domain, I domain-like [IPRO22675] (1); NB-ARC [IPRO02182] (1); P-loop containing nucleoside triphosphate hydrolase [IPRO27417] (1)                                                                                                                                                                                                           | -                           | C_ushii_00451_mRNA_13.1 | -                    |
| GF0037289 | 0                        | 1                | 0                 | Monosaccharide transport protein (1)                              |                                                                                                                                                                                                                                                             |                                                                                                                                                                                                                                                                                                                                                                  | -                           | C_ushii_00451_mRNA_10.1 | -                    |
| GF0037288 | 0                        | 1                | 0                 | Hypothetical protein (1)                                          |                                                                                                                                                                                                                                                             |                                                                                                                                                                                                                                                                                                                                                                  | -                           | C_ushii_00450_mRNA_7.1  | -                    |
| GF0037287 | 0                        | 1                | 0                 | Hypothetical protein (1)                                          |                                                                                                                                                                                                                                                             |                                                                                                                                                                                                                                                                                                                                                                  | -                           | C_ushii_00450_mRNA_18.1 | -                    |
| GF0037286 | 0                        | 1                | 0                 | Hypothetical protein (1)                                          |                                                                                                                                                                                                                                                             |                                                                                                                                                                                                                                                                                                                                                                  | -                           | C_ushii_00450_mRNA_17.1 | -                    |
| GF0037285 | 0                        | 1                | 0                 | Hypothetical protein (1)                                          |                                                                                                                                                                                                                                                             |                                                                                                                                                                                                                                                                                                                                                                  | -                           | C_ushii_00449_mRNA_7.1  | -                    |
| GF0037284 | 0                        | 1                | 0                 | Uncharacterized mitochondrial protein AChg00810 (1)               |                                                                                                                                                                                                                                                             | Reverse transcriptase, RNA-dependent DNA polymerase [IPRO13101] (1); Peptidase S9, prolyl oligopeptidase, catalytic domain [IPRO10175] (1); Protein-tyrosine phosphatase-like [IPRO29021] (1); Alpha/Beta hydrolase fold [IPRO28058] (1)                                                                                                                         | -                           | C_ushii_00449_mRNA_5.1  | -                    |
| GF0037283 | 0                        | 1                | 0                 | Hypothetical protein (1)                                          | proteolysis [GO:0006508 biological_process] (1); serine-type peptidase activity [GO:0008286 molecular_function] (1)                                                                                                                                         |                                                                                                                                                                                                                                                                                                                                                                  | -                           | C_ushii_00449_mRNA_4.1  | -                    |
| GF0037282 | 0                        | 1                | 0                 | Hypothetical protein (1)                                          |                                                                                                                                                                                                                                                             |                                                                                                                                                                                                                                                                                                                                                                  | -                           | C_ushii_00449_mRNA_2.1  | -                    |
| GF0037281 | 0                        | 1                | 0                 | Hypothetical protein (1)                                          |                                                                                                                                                                                                                                                             |                                                                                                                                                                                                                                                                                                                                                                  | -                           | C_ushii_00448_mRNA_7.1  | -                    |
| GF0037280 | 0                        | 1                | 0                 | Hypothetical protein (1)                                          |                                                                                                                                                                                                                                                             |                                                                                                                                                                                                                                                                                                                                                                  | -                           | C_ushii_00448_mRNA_20.1 | -                    |
| GF0037279 | 0                        | 1                | 0                 | G-type lectin S-receptor-like serine/threonine-protein kinase (1) | protein kinase activity [GO:0004672 molecular_function] (1); protein phosphorylation [GO:0006468 biological_process] (1); ATP binding [GO:0005524 molecular_function] (1)                                                                                   | Protein kinase domain [IPRO00719] (1); Protein kinase-like domain [IPRO11009] (1); Serine/threonine dual specificity protein kinase, catalytic domain [IPRO02900] (1); Serine/threonine-protein kinase, active site [IPRO08271] (1); Protein kinase, ATP binding site [IPRO17441] (1); Serine/threonine-tyrosine-protein kinase catalytic domain [IPRO01245] (1) | -                           | C_ushii_00448_mRNA_12.1 | -                    |
| GF0037278 | 0                        | 1                | 0                 | Golgin candidate 1 (1)                                            |                                                                                                                                                                                                                                                             |                                                                                                                                                                                                                                                                                                                                                                  | -                           | C_ushii_00448_mRNA_1.1  | -                    |
| GF0037277 | 0                        | 1                | 0                 | Hypothetical protein (1)                                          |                                                                                                                                                                                                                                                             |                                                                                                                                                                                                                                                                                                                                                                  | -                           | C_ushii_00447_mRNA_41.1 | -                    |
| GF0037276 | 0                        | 1                | 0                 | Hypothetical protein (1)                                          |                                                                                                                                                                                                                                                             |                                                                                                                                                                                                                                                                                                                                                                  | -                           | C_ushii_00447_mRNA_37.1 | -                    |
| GF0037275 | 0                        | 1                | 0                 | Hypothetical protein (1)                                          |                                                                                                                                                                                                                                                             |                                                                                                                                                                                                                                                                                                                                                                  | -                           | C_ushii_00447_mRNA_36.1 | -                    |
| GF0037274 | 0                        | 1                | 0                 | Hypothetical protein (1)                                          |                                                                                                                                                                                                                                                             |                                                                                                                                                                                                                                                                                                                                                                  | -                           | C_ushii_00447_mRNA_35.1 | -                    |
| GF0037273 | 0                        | 1                | 0                 | Hypothetical protein (1)                                          |                                                                                                                                                                                                                                                             |                                                                                                                                                                                                                                                                                                                                                                  | -                           | C_ushii_00447_mRNA_34.1 | -                    |
| GF0037272 | 0                        | 1                | 0                 | Hypothetical protein (1)                                          |                                                                                                                                                                                                                                                             |                                                                                                                                                                                                                                                                                                                                                                  | -                           | C_ushii_00447_mRNA_33.1 | -                    |
| GF0037271 | 0                        | 1                | 0                 | Hypothetical protein (1)                                          |                                                                                                                                                                                                                                                             |                                                                                                                                                                                                                                                                                                                                                                  | -                           | C_ushii_00447_mRNA_25.1 | -                    |
| GF0037270 | 0                        | 1                | 0                 | Hypothetical protein (1)                                          |                                                                                                                                                                                                                                                             | Munc13 homology 1 [IPRO14770] (1); Protein of unknown function DUF919 [IPRO08528] (1)                                                                                                                                                                                                                                                                            | -                           | C_ushii_00447_mRNA_2.1  | -                    |
| GF0037269 | 0                        | 1                | 0                 | Hypothetical protein (1)                                          |                                                                                                                                                                                                                                                             | Agnet domain, plant type [IPRO14002] (1)                                                                                                                                                                                                                                                                                                                         | -                           | C_ushii_00447_mRNA_10.1 | -                    |
| GF0037268 | 0                        | 1                | 0                 | Hypothetical protein (1)                                          |                                                                                                                                                                                                                                                             |                                                                                                                                                                                                                                                                                                                                                                  | -                           | C_ushii_00447_mRNA_1.1  | -                    |
| GF0037267 | 0                        | 1                | 0                 | Cation H(+) antiporter 20 (1)                                     | integral component of membrane [GO:0016021 cellular_component] (1); cation transport [GO:000612 biological_process] (1); solute proton antiporter activity [GO:0015299 molecular_function] (1); transmembrane transport [GO:0055085 biological_process] (1) | Cation H(+) exchanger [IPRO06153] (1)                                                                                                                                                                                                                                                                                                                            | -                           | C_ushii_00446_mRNA_7.1  | -                    |
| GF0037266 | 0                        | 1                | 0                 | Hypothetical protein (1)                                          |                                                                                                                                                                                                                                                             |                                                                                                                                                                                                                                                                                                                                                                  | -                           | C_ushii_00446_mRNA_6.1  | -                    |
| GF0037265 | 0                        | 1                | 0                 | Hypothetical protein (1)                                          |                                                                                                                                                                                                                                                             |                                                                                                                                                                                                                                                                                                                                                                  | -                           | C_ushii_00446_mRNA_5.1  | -                    |
| GF0037264 | 0                        | 1                | 0                 | Hypothetical protein (1)                                          | cysteine-type peptidase activity [GO:0006234 molecular_function] (1); proteolysis [GO:0006508 biological_process] (1)                                                                                                                                       | Ulp1 protease family, C-terminal catalytic domain [IPRO03653] (1)                                                                                                                                                                                                                                                                                                | -                           | C_ushii_00446_mRNA_14.1 | -                    |
| GF0037263 | 0                        | 1                | 0                 | Serine/threonine-protein phosphatase PPI isozyme 2 (1)            | hydrolase activity [GO:0016787 molecular_function] (1)                                                                                                                                                                                                      | Serine/threonine-specific protein phosphatase hcd5-nucleosyl-tetraphosphate [IPRO06196] (1); Metallo-dependent phosphatase-like [IPRO28052] (1); Calcineurin-like phosphoesterase domain, apaf type [IPRO04843] (1)                                                                                                                                              | -                           | C_ushii_00446_mRNA_1.1  | -                    |
| GF0037262 | 0                        | 1                | 0                 | Hypothetical protein (1)                                          |                                                                                                                                                                                                                                                             |                                                                                                                                                                                                                                                                                                                                                                  | -                           | C_ushii_00445_mRNA_5.1  | -                    |

| ID        | Num. in <i>C. crottensteini</i> | Num. in <i>C. auris</i> | Num. in <i>P. putida</i> | Note                                                             | GO                                                                                                                                                                                                                                                                                                                                                                                                         | InterPro                                                                                                                                                                                                              | Members in <i>C. crottensteini</i> | Members in <i>C. auris</i> | Members in <i>P. putida</i> |
|-----------|---------------------------------|-------------------------|--------------------------|------------------------------------------------------------------|------------------------------------------------------------------------------------------------------------------------------------------------------------------------------------------------------------------------------------------------------------------------------------------------------------------------------------------------------------------------------------------------------------|-----------------------------------------------------------------------------------------------------------------------------------------------------------------------------------------------------------------------|------------------------------------|----------------------------|-----------------------------|
| GF0037261 | 0                               | 1                       | 0                        | 0 Accelerated cell death 6 (1)                                   | protein binding [GO:0005515 molecular_function] (1)                                                                                                                                                                                                                                                                                                                                                        | Askyrin repeat-containing domain [IPR020683] (1); POG domain [IPR020691] (1); Askyrin repeat [IPR002110] (4)                                                                                                          | -                                  | C_unihit_00445_mRNA_4.1    | -                           |
| GF0037260 | 0                               | 1                       | 0                        | 0 Hypothetical protein (1)                                       | -                                                                                                                                                                                                                                                                                                                                                                                                          | -                                                                                                                                                                                                                     | -                                  | C_unihit_00445_mRNA_3.1    | -                           |
| GF0037259 | 0                               | 1                       | 0                        | 0 Hypothetical protein (1)                                       | catalytic activity [GO:0003824 molecular_function] (1)                                                                                                                                                                                                                                                                                                                                                     | HIT-like domain [IPR01146] (1); CwlF9-like, C-terminal domain-1 [IPR006768] (1); CwlF9-like protein, C-terminal domain-2 [IPR006767] (1)                                                                              | -                                  | C_unihit_00445_mRNA_24.1   | -                           |
| GF0037258 | 0                               | 1                       | 0                        | 0 Hypothetical protein (1)                                       | -                                                                                                                                                                                                                                                                                                                                                                                                          | -                                                                                                                                                                                                                     | -                                  | C_unihit_00445_mRNA_23.1   | -                           |
| GF0037257 | 0                               | 1                       | 0                        | 0 Hypothetical protein (1)                                       | -                                                                                                                                                                                                                                                                                                                                                                                                          | -                                                                                                                                                                                                                     | -                                  | C_unihit_00445_mRNA_22.1   | -                           |
| GF0037256 | 0                               | 1                       | 0                        | 0 Hypothetical protein (1)                                       | -                                                                                                                                                                                                                                                                                                                                                                                                          | -                                                                                                                                                                                                                     | -                                  | C_unihit_00445_mRNA_21.1   | -                           |
| GF0037255 | 0                               | 1                       | 0                        | 0 Askyrin repeat family protein, putative (1)                    | protein binding [GO:0005515 molecular_function] (1)                                                                                                                                                                                                                                                                                                                                                        | Askyrin repeat [IPR02110] (1); Askyrin repeat-containing domain [IPR020683] (1); POG domain [IPR020691] (1)                                                                                                           | -                                  | C_unihit_00445_mRNA_2.1    | -                           |
| GF0037254 | 0                               | 1                       | 0                        | 0 Ribonuclease H-like superfamily protein (1)                    | -                                                                                                                                                                                                                                                                                                                                                                                                          | Reverse transcriptase zinc-binding domain [IPR020660] (1)                                                                                                                                                             | -                                  | C_unihit_00445_mRNA_1.1    | -                           |
| GF0037253 | 0                               | 1                       | 0                        | 0 Hypothetical protein (1)                                       | -                                                                                                                                                                                                                                                                                                                                                                                                          | -                                                                                                                                                                                                                     | -                                  | C_unihit_00444_mRNA_5.1    | -                           |
| GF0037252 | 0                               | 1                       | 0                        | 0 Hypothetical protein (1)                                       | -                                                                                                                                                                                                                                                                                                                                                                                                          | -                                                                                                                                                                                                                     | -                                  | C_unihit_00444_mRNA_4.1    | -                           |
| GF0037251 | 0                               | 1                       | 0                        | 0 Hypothetical protein (1)                                       | cysteine-type peptidase activity [GO:0005234 molecular_function] (1); proteolysis [GO:0006508 biological_process] (1)                                                                                                                                                                                                                                                                                      | Upl1 protease family, C-terminal catalytic domain [IPR030453] (1)                                                                                                                                                     | -                                  | C_unihit_00444_mRNA_18.1   | -                           |
| GF0037250 | 0                               | 1                       | 0                        | 0 Hypothetical protein (1)                                       | -                                                                                                                                                                                                                                                                                                                                                                                                          | -                                                                                                                                                                                                                     | -                                  | C_unihit_00444_mRNA_17.1   | -                           |
| GF0037249 | 0                               | 1                       | 0                        | 0 Hypothetical protein (1)                                       | -                                                                                                                                                                                                                                                                                                                                                                                                          | -                                                                                                                                                                                                                     | -                                  | C_unihit_00444_mRNA_16.1   | -                           |
| GF0037248 | 0                               | 1                       | 0                        | 0 Hypothetical protein (1)                                       | -                                                                                                                                                                                                                                                                                                                                                                                                          | -                                                                                                                                                                                                                     | -                                  | C_unihit_00444_mRNA_15.1   | -                           |
| GF0037247 | 0                               | 1                       | 0                        | 0 Hypothetical protein (1)                                       | -                                                                                                                                                                                                                                                                                                                                                                                                          | -                                                                                                                                                                                                                     | -                                  | C_unihit_00444_mRNA_14.1   | -                           |
| GF0037246 | 0                               | 1                       | 0                        | 0 Hypothetical protein (1)                                       | -                                                                                                                                                                                                                                                                                                                                                                                                          | -                                                                                                                                                                                                                     | -                                  | C_unihit_00443_mRNA_3.1    | -                           |
| GF0037245 | 0                               | 1                       | 0                        | 0 Hypothetical protein (1)                                       | -                                                                                                                                                                                                                                                                                                                                                                                                          | -                                                                                                                                                                                                                     | -                                  | C_unihit_00443_mRNA_22.1   | -                           |
| GF0037244 | 0                               | 1                       | 0                        | 0 Hypothetical protein (1)                                       | -                                                                                                                                                                                                                                                                                                                                                                                                          | -                                                                                                                                                                                                                     | -                                  | C_unihit_00443_mRNA_21.1   | -                           |
| GF0037243 | 0                               | 1                       | 0                        | 0 NBS type disease resistance protein (1)                        | ADP binding [GO:0042531 molecular_function] (1)                                                                                                                                                                                                                                                                                                                                                            | NB-ARC [IPR02182] (1); P-loop containing nucleoside triphosphate hydrolyase [IPR027474] (1); Leucine-rich repeat domain, L domain-like [IPR02675] (4); Winged helix-turn-helix DNA-binding domain [IPR011991] (1)     | -                                  | C_unihit_00443_mRNA_18.1   | -                           |
| GF0037242 | 0                               | 1                       | 0                        | 0 Hypothetical protein (1)                                       | -                                                                                                                                                                                                                                                                                                                                                                                                          | -                                                                                                                                                                                                                     | -                                  | C_unihit_00443_mRNA_16.1   | -                           |
| GF0037241 | 0                               | 1                       | 0                        | 0 Putative non-LTR reverse transcriptase (1)                     | -                                                                                                                                                                                                                                                                                                                                                                                                          | Reverse transcriptase zinc-binding domain [IPR020660] (1)                                                                                                                                                             | -                                  | C_unihit_00443_mRNA_15.1   | -                           |
| GF0037240 | 0                               | 1                       | 0                        | 0 Hypothetical protein (1)                                       | -                                                                                                                                                                                                                                                                                                                                                                                                          | -                                                                                                                                                                                                                     | -                                  | C_unihit_00443_mRNA_14.1   | -                           |
| GF0037239 | 0                               | 1                       | 0                        | 0 Hypothetical protein (1)                                       | -                                                                                                                                                                                                                                                                                                                                                                                                          | Leucine-rich repeat domain, L domain-like [IPR02675] (1)                                                                                                                                                              | -                                  | C_unihit_00442_mRNA_5.1    | -                           |
| GF0037238 | 0                               | 1                       | 0                        | 0 Hypothetical protein (1)                                       | -                                                                                                                                                                                                                                                                                                                                                                                                          | -                                                                                                                                                                                                                     | -                                  | C_unihit_00441_mRNA_5.1    | -                           |
| GF0037237 | 0                               | 1                       | 0                        | 0 Cysteine/Histidine-rich C1 domain family protein, putative (1) | intracellular signal transduction [GO:0005556 biological_process] (1)                                                                                                                                                                                                                                                                                                                                      | Protein kinase C-like, phorbol ester/alkylglycerol-binding domain [IPR02219] (1)                                                                                                                                      | -                                  | C_unihit_00441_mRNA_3.1    | -                           |
| GF0037236 | 0                               | 1                       | 0                        | 0 Hypothetical protein (1)                                       | -                                                                                                                                                                                                                                                                                                                                                                                                          | -                                                                                                                                                                                                                     | -                                  | C_unihit_00441_mRNA_24.1   | -                           |
| GF0037235 | 0                               | 1                       | 0                        | 0 Hypothetical protein (1)                                       | -                                                                                                                                                                                                                                                                                                                                                                                                          | -                                                                                                                                                                                                                     | -                                  | C_unihit_00441_mRNA_23.1   | -                           |
| GF0037234 | 0                               | 1                       | 0                        | 0 Hypothetical protein (1)                                       | -                                                                                                                                                                                                                                                                                                                                                                                                          | -                                                                                                                                                                                                                     | -                                  | C_unihit_00441_mRNA_21.1   | -                           |
| GF0037233 | 0                               | 1                       | 0                        | 0 Hypothetical protein (1)                                       | -                                                                                                                                                                                                                                                                                                                                                                                                          | -                                                                                                                                                                                                                     | -                                  | C_unihit_00441_mRNA_20.1   | -                           |
| GF0037232 | 0                               | 1                       | 0                        | 0 Hypothetical protein (1)                                       | -                                                                                                                                                                                                                                                                                                                                                                                                          | -                                                                                                                                                                                                                     | -                                  | C_unihit_00441_mRNA_19.1   | -                           |
| GF0037231 | 0                               | 1                       | 0                        | 0 Hypothetical protein (1)                                       | -                                                                                                                                                                                                                                                                                                                                                                                                          | -                                                                                                                                                                                                                     | -                                  | C_unihit_00441_mRNA_18.1   | -                           |
| GF0037230 | 0                               | 1                       | 0                        | 0 Hypothetical protein (1)                                       | -                                                                                                                                                                                                                                                                                                                                                                                                          | -                                                                                                                                                                                                                     | -                                  | C_unihit_00441_mRNA_17.1   | -                           |
| GF0037229 | 0                               | 1                       | 0                        | 0 Hypothetical protein (1)                                       | -                                                                                                                                                                                                                                                                                                                                                                                                          | -                                                                                                                                                                                                                     | -                                  | C_unihit_00441_mRNA_14.1   | -                           |
| GF0037228 | 0                               | 1                       | 0                        | 0 LRR receptor-like kinase family protein (1)                    | protein binding [GO:0005515 molecular_function] (1)                                                                                                                                                                                                                                                                                                                                                        | Leucine-rich repeat domain, L domain-like [IPR02675] (1); Leucine-rich repeat [IPR01011] (1); Leucine-rich repeat-containing N-terminal, plant-type [IPR013210] (4)                                                   | -                                  | C_unihit_00441_mRNA_10.1   | -                           |
| GF0037227 | 0                               | 1                       | 0                        | 0 Hypothetical protein (1)                                       | -                                                                                                                                                                                                                                                                                                                                                                                                          | -                                                                                                                                                                                                                     | -                                  | C_unihit_00440_mRNA_8.1    | -                           |
| GF0037226 | 0                               | 1                       | 0                        | 0 Hypothetical protein (1)                                       | -                                                                                                                                                                                                                                                                                                                                                                                                          | -                                                                                                                                                                                                                     | -                                  | C_unihit_00440_mRNA_6.1    | -                           |
| GF0037225 | 0                               | 1                       | 0                        | 0 Hypothetical protein (1)                                       | -                                                                                                                                                                                                                                                                                                                                                                                                          | -                                                                                                                                                                                                                     | -                                  | C_unihit_00440_mRNA_23.1   | -                           |
| GF0037224 | 0                               | 1                       | 0                        | 0 Hypothetical protein (1)                                       | -                                                                                                                                                                                                                                                                                                                                                                                                          | -                                                                                                                                                                                                                     | -                                  | C_unihit_00440_mRNA_21.1   | -                           |
| GF0037223 | 0                               | 1                       | 0                        | 0 Retrotransposon gag protein (1)                                | lipid metabolic process [GO:0006629 biological_process] (1); cytoplasm [GO:0005737 cellular_component] (1); integral component of membrane [GO:0016022 cellular_component] (1); oxidoreductase activity, acting on the CH-CH group of donors [GO:0016627 molecular_function] (1)                                                                                                                           | 3-oxo-5-alpha-steroid 4-dehydrogenase, C-terminal [IPR01164] (1); Actin family [IPR00400] (1); Actin-like conserved site [IPR020902] (1); Actin, conserved site [IPR004001] (1)                                       | -                                  | C_unihit_00439_mRNA_9.1    | -                           |
| GF0037222 | 0                               | 1                       | 0                        | 0 Hypothetical protein (1)                                       | protein kinase activity [GO:0004672 molecular_function] (1); protein phosphorylation [GO:0006468 biological_process] (1); ATP binding [GO:0005524 molecular_function] (1)                                                                                                                                                                                                                                  | Protein kinase-like domain [IPR011009] (1); Protein kinase domain [IPR000719] (1)                                                                                                                                     | -                                  | C_unihit_00439_mRNA_40.1   | -                           |
| GF0037220 | 0                               | 1                       | 0                        | 0 PK (1)                                                         | protein phosphorylation [GO:0006468 biological_process] (1); protein kinase activity [GO:0004672 molecular_function] (1); ATP binding [GO:0005524 molecular_function] (1)                                                                                                                                                                                                                                  | Protein kinase domain [IPR000719] (1); Protein kinase-like domain [IPR011009] (1)                                                                                                                                     | -                                  | C_unihit_00439_mRNA_36.1   | -                           |
| GF0037219 | 0                               | 1                       | 0                        | 0 Monosaccharide transport protein (1)                           | -                                                                                                                                                                                                                                                                                                                                                                                                          | -                                                                                                                                                                                                                     | -                                  | C_unihit_00439_mRNA_35.1   | -                           |
| GF0037218 | 0                               | 1                       | 0                        | 0 Hypothetical protein (1)                                       | -                                                                                                                                                                                                                                                                                                                                                                                                          | -                                                                                                                                                                                                                     | -                                  | C_unihit_00439_mRNA_34.1   | -                           |
| GF0037217 | 0                               | 1                       | 0                        | 0 Hypothetical protein (1)                                       | -                                                                                                                                                                                                                                                                                                                                                                                                          | -                                                                                                                                                                                                                     | -                                  | C_unihit_00439_mRNA_32.1   | -                           |
| GF0037216 | 0                               | 1                       | 0                        | 0 Hypothetical protein (1)                                       | protein phosphorylation [GO:0006468 biological_process] (1); protein kinase activity [GO:0004672 molecular_function] (1); ATP binding [GO:0005524 molecular_function] (1)                                                                                                                                                                                                                                  | Serine/threonine/tyrosine protein kinase catalytic domain [IPR021245] (1); Protein kinase-like domain [IPR011009] (1); Protein kinase domain [IPR000719] (1)                                                          | -                                  | C_unihit_00439_mRNA_31.1   | -                           |
| GF0037215 | 0                               | 1                       | 0                        | 0 Hypothetical protein (1)                                       | -                                                                                                                                                                                                                                                                                                                                                                                                          | -                                                                                                                                                                                                                     | -                                  | C_unihit_00439_mRNA_29.1   | -                           |
| GF0037214 | 0                               | 1                       | 0                        | 0 Monosaccharide transport protein (1)                           | -                                                                                                                                                                                                                                                                                                                                                                                                          | -                                                                                                                                                                                                                     | -                                  | C_unihit_00439_mRNA_28.1   | -                           |
| GF0037213 | 0                               | 1                       | 0                        | 0 Hypothetical protein (1)                                       | -                                                                                                                                                                                                                                                                                                                                                                                                          | F-box associated interaction domain [IPR017451] (4)                                                                                                                                                                   | -                                  | C_unihit_00439_mRNA_21.1   | -                           |
| GF0037212 | 0                               | 1                       | 0                        | 0 Hypothetical protein (1)                                       | protein binding [GO:0005515 molecular_function] (1)                                                                                                                                                                                                                                                                                                                                                        | F-box domain [IPR001810] (1)                                                                                                                                                                                          | -                                  | C_unihit_00439_mRNA_20.1   | -                           |
| GF0037211 | 0                               | 1                       | 0                        | 0 Germin-like protein subfamily 1 member 7 (4)                   | nutrient reservoir activity [GO:0045735 molecular_function] (1); manganese ion binding [GO:0010145 molecular_function] (1)                                                                                                                                                                                                                                                                                 | Germin, manganese binding site [IPR01780] (1); Cupin 1 [IPR006045] (1); RucC-like jelly roll fold [IPR014710] (1); Germin [IPR001929] (1); RucC-like cupin domain [IPR011051] (1)                                     | -                                  | C_unihit_00438_mRNA_7.1    | -                           |
| GF0037210 | 0                               | 1                       | 0                        | 0 Hypothetical protein (1)                                       | -                                                                                                                                                                                                                                                                                                                                                                                                          | -                                                                                                                                                                                                                     | -                                  | C_unihit_00438_mRNA_22.1   | -                           |
| GF0037209 | 0                               | 1                       | 0                        | 0 Hypothetical protein (1)                                       | -                                                                                                                                                                                                                                                                                                                                                                                                          | -                                                                                                                                                                                                                     | -                                  | C_unihit_00438_mRNA_2.1    | -                           |
| GF0037208 | 0                               | 1                       | 0                        | 0 Hypothetical protein (1)                                       | -                                                                                                                                                                                                                                                                                                                                                                                                          | Organ specific protein [IPR024489] (1); Domain of unknown function DUF4283 [IPR025588] (1); Reverse transcriptase domain [IPR00077] (1)                                                                               | -                                  | C_unihit_00438_mRNA_13.1   | -                           |
| GF0037207 | 0                               | 1                       | 0                        | 0 Hypothetical protein (1)                                       | nutrient reservoir activity [GO:0045735 molecular_function] (1); manganese ion binding [GO:0010145 molecular_function] (1)                                                                                                                                                                                                                                                                                 | Germin, manganese binding site [IPR01780] (1); Cupin 1 [IPR006045] (1); RucC-like jelly roll fold [IPR014710] (1); Germin [IPR001929] (1); RucC-like cupin domain [IPR011051] (1)                                     | -                                  | C_unihit_00438_mRNA_12.1   | -                           |
| GF0037206 | 0                               | 1                       | 0                        | 0 Hypothetical protein (1)                                       | -                                                                                                                                                                                                                                                                                                                                                                                                          | -                                                                                                                                                                                                                     | -                                  | C_unihit_00438_mRNA_1.1    | -                           |
| GF0037205 | 0                               | 1                       | 0                        | 0 Hypothetical protein (1)                                       | -                                                                                                                                                                                                                                                                                                                                                                                                          | -                                                                                                                                                                                                                     | -                                  | C_unihit_00437_mRNA_23.1   | -                           |
| GF0037204 | 0                               | 1                       | 0                        | 0 Hypothetical protein (1)                                       | -                                                                                                                                                                                                                                                                                                                                                                                                          | -                                                                                                                                                                                                                     | -                                  | C_unihit_00437_mRNA_21.1   | -                           |
| GF0037203 | 0                               | 1                       | 0                        | 0 Hypothetical protein (1)                                       | protein binding [GO:0005515 molecular_function] (1)                                                                                                                                                                                                                                                                                                                                                        | Tetratricopeptide-like helical domain [IPR011990] (1)                                                                                                                                                                 | -                                  | C_unihit_00437_mRNA_11.1   | -                           |
| GF0037202 | 0                               | 1                       | 0                        | 0 3-keetoacyl-CoA synthase 11 (1)                                | transferase activity, transferring acyl groups other than amino-acyl groups [GO:0016747 molecular_function] (1); fatty acid biosynthetic process [GO:0006533 biological_process] (1); transferase activity, transferring acyl groups other than amino-acyl groups [GO:0016747 molecular_function] (1); membrane [GO:0016022 cellular_component] (1); metabolic process [GO:0008152 biological_process] (1) | FAE1/Type III polyketide synthase-like protein [IPR013601] (1); Very-long-chain 3-keetoacyl-CoA synthase [IPR012392] (1); Thioester-like [IPR016059] (1)                                                              | -                                  | C_unihit_00436_mRNA_4.1    | -                           |
| GF0037201 | 0                               | 1                       | 0                        | 0 Hypothetical protein (1)                                       | -                                                                                                                                                                                                                                                                                                                                                                                                          | -                                                                                                                                                                                                                     | -                                  | C_unihit_00436_mRNA_32.1   | -                           |
| GF0037200 | 0                               | 1                       | 0                        | 0 Hypothetical protein (1)                                       | -                                                                                                                                                                                                                                                                                                                                                                                                          | -                                                                                                                                                                                                                     | -                                  | C_unihit_00436_mRNA_31.1   | -                           |
| GF0037199 | 0                               | 1                       | 0                        | 0 Hypothetical protein (1)                                       | -                                                                                                                                                                                                                                                                                                                                                                                                          | -                                                                                                                                                                                                                     | -                                  | C_unihit_00436_mRNA_29.1   | -                           |
| GF0037198 | 0                               | 1                       | 0                        | 0 Hypothetical protein (1)                                       | -                                                                                                                                                                                                                                                                                                                                                                                                          | -                                                                                                                                                                                                                     | -                                  | C_unihit_00436_mRNA_21.1   | -                           |
| GF0037197 | 0                               | 1                       | 0                        | 0 Hypothetical protein (1)                                       | catalytic activity [GO:0003824 molecular_function] (1); fatty acid biosynthetic process [GO:0006533 biological_process] (1); transferase activity, transferring acyl groups other than amino-acyl groups [GO:0016747 molecular_function] (1); membrane [GO:0016022 cellular_component] (1); metabolic process [GO:0008152 biological_process] (1)                                                          | FAE1/Type III polyketide synthase-like protein [IPR013601] (1); Very-long-chain 3-keetoacyl-CoA synthase [IPR012392] (1)                                                                                              | -                                  | C_unihit_00436_mRNA_2.1    | -                           |
| GF0037196 | 0                               | 1                       | 0                        | 0 Hypothetical protein (1)                                       | -                                                                                                                                                                                                                                                                                                                                                                                                          | -                                                                                                                                                                                                                     | -                                  | C_unihit_00436_mRNA_19.1   | -                           |
| GF0037195 | 0                               | 1                       | 0                        | 0 Hypothetical protein (1)                                       | -                                                                                                                                                                                                                                                                                                                                                                                                          | Transposase, MuIR, plant [IPR004322] (1); Protein kinase-like domain [IPR011009] (1)                                                                                                                                  | -                                  | C_unihit_00436_mRNA_14.1   | -                           |
| GF0037194 | 0                               | 1                       | 0                        | 0 Amidophosphoribosyltransferase (1)                             | amidophosphoribosyltransferase activity [GO:0004044 molecular_function] (1); purine nucleobase biosynthetic process [GO:0009013 biological_process] (1)                                                                                                                                                                                                                                                    | Amidophosphoribosyltransferase [IPR005854] (1); Nucleophosphate amidehydrolases, N-terminal [IPR029055] (1); Phosphoribosyltransferase-like [IPR029057] (1); Glutamine amidotransferase type 2 domain [IPR017923] (1) | -                                  | C_unihit_00435_mRNA_9.1    | -                           |
| GF0037193 | 0                               | 1                       | 0                        | 0 Hypothetical protein (1)                                       | -                                                                                                                                                                                                                                                                                                                                                                                                          | Phosphoribosyltransferase-like [IPR029057] (1); Nucleophosphate amidehydrolases, N-terminal [IPR029055] (1)                                                                                                           | -                                  | C_unihit_00435_mRNA_5.1    | -                           |
| GF0037192 | 0                               | 1                       | 0                        | 0 Hypothetical protein (1)                                       | -                                                                                                                                                                                                                                                                                                                                                                                                          | Glutamine amidotransferase type 2 domain [IPR017923] (1); Nucleophosphate amidehydrolases, N-terminal [IPR029055] (1)                                                                                                 | -                                  | C_unihit_00435_mRNA_4.1    | -                           |

| ID        | Num. in C. crottenstei | Num. in C. auris | Num. in P. putida | Note                                                              | GO                                                                                                                                                                                                                                                                                                                 | InterPro                                                                                                                                                                                                                                                                                                                                               | Members in C. crottenstei | Members in C. auris     | Members in P. putida |
|-----------|------------------------|------------------|-------------------|-------------------------------------------------------------------|--------------------------------------------------------------------------------------------------------------------------------------------------------------------------------------------------------------------------------------------------------------------------------------------------------------------|--------------------------------------------------------------------------------------------------------------------------------------------------------------------------------------------------------------------------------------------------------------------------------------------------------------------------------------------------------|---------------------------|-------------------------|----------------------|
| GF0037191 | 0                      | 1                | 0                 | Hypothetical protein (1)                                          |                                                                                                                                                                                                                                                                                                                    |                                                                                                                                                                                                                                                                                                                                                        |                           | C_umhiu_00435_mRNA_22.1 | -                    |
| GF0037190 | 0                      | 1                | 0                 | Hypothetical protein (1)                                          |                                                                                                                                                                                                                                                                                                                    |                                                                                                                                                                                                                                                                                                                                                        |                           | C_umhiu_00435_mRNA_20.1 | -                    |
| GF0037189 | 0                      | 1                | 0                 | Hypothetical protein (1)                                          |                                                                                                                                                                                                                                                                                                                    |                                                                                                                                                                                                                                                                                                                                                        |                           | C_umhiu_00435_mRNA_19.1 | -                    |
| GF0037188 | 0                      | 1                | 0                 | Hypothetical protein (1)                                          |                                                                                                                                                                                                                                                                                                                    | Glutamine amidotransferase type 2 domain [IPRO17922] (1); Nucleophilic aminoalcoholases, N-terminal [IPRO29055] (1)                                                                                                                                                                                                                                    |                           | C_umhiu_00435_mRNA_10.1 | -                    |
| GF0037187 | 0                      | 1                | 0                 | Hypothetical protein (1)                                          | ADP binding [GO:0043531 molecular_function] (1)                                                                                                                                                                                                                                                                    | P-loop containing nucleoside triphosphate hydrolase [IPRO27417] (1); NB-ARC [IPRO2182] (1)                                                                                                                                                                                                                                                             |                           | C_umhiu_00435_mRNA_1.1  | -                    |
| GF0037186 | 0                      | 1                | 0                 | Hypothetical protein (1)                                          | nucleic acid binding [GO:0003676 molecular_function] (1)                                                                                                                                                                                                                                                           | Ribonuclease H-like domain [IPRO12337] (1)                                                                                                                                                                                                                                                                                                             |                           | C_umhiu_00434_mRNA_30.1 | -                    |
| GF0037185 | 0                      | 1                | 0                 | BED zinc finger, HAT family dimerization domain (1)               | DNA binding [GO:0003677 molecular_function] (1); protein dimerization activity [GO:0046983 molecular_function] (1); nucleic acid binding [GO:0003676 molecular_function] (1)                                                                                                                                       | Zinc finger, BED-type [IPRO3656] (1); Ribonuclease H-like domain [IPRO12337] (1); HAT-like transposase; RNase-H fold [IPRO2525] (1); HAT, C-terminal dimerization domain [IPRO08906] (1)                                                                                                                                                               |                           | C_umhiu_00434_mRNA_3.1  | -                    |
| GF0037184 | 0                      | 1                | 0                 | Putative RNA-directed DNA polymerase                              |                                                                                                                                                                                                                                                                                                                    | Reverse transcriptase zinc-binding domain [IPRO26960] (1)                                                                                                                                                                                                                                                                                              |                           | C_umhiu_00434_mRNA_29.1 | -                    |
| GF0037183 | 0                      | 1                | 0                 | Hypothetical protein (1)                                          |                                                                                                                                                                                                                                                                                                                    |                                                                                                                                                                                                                                                                                                                                                        |                           | C_umhiu_00434_mRNA_27.1 | -                    |
| GF0037182 | 0                      | 1                | 0                 | Hypothetical protein (1)                                          | ATP binding [GO:0005524 molecular_function] (1); protein kinase activity [GO:0004672 molecular_function] (1); protein phosphorylation [GO:0006468 biological_process] (1)                                                                                                                                          | Serine/threonine-protein kinase, active site [IPRO27151] (1); Protein kinase-like domain [IPRO11009] (1); Protein kinase domain [IPRO00719] (1)                                                                                                                                                                                                        |                           | C_umhiu_00434_mRNA_22.1 | -                    |
| GF0037181 | 0                      | 1                | 0                 | Hypothetical protein (1)                                          |                                                                                                                                                                                                                                                                                                                    | Domain of unknown function DUF4220 [IPRO25153] (1)                                                                                                                                                                                                                                                                                                     |                           | C_umhiu_00434_mRNA_18.1 | -                    |
| GF0037180 | 0                      | 1                | 0                 | Hypothetical protein (1)                                          |                                                                                                                                                                                                                                                                                                                    | Pentatricopeptide repeat [IPRO2388] (1)                                                                                                                                                                                                                                                                                                                |                           | C_umhiu_00434_mRNA_12.1 | -                    |
| GF0037179 | 0                      | 1                | 0                 | BZIP domain class transcription factor isoform 6 (1)              | transcription factor activity, sequence-specific; DNA binding [GO:0003700 molecular_function] (1); regulation of transcription, DNA-templated [GO:0006355 biological_process] (1); sequence-specific DNA binding [GO:0043565 molecular_function] (1)                                                               | Basic-leucine zipper domain [IPRO04827] (1)                                                                                                                                                                                                                                                                                                            |                           | C_umhiu_00434_mRNA_10.1 | -                    |
| GF0037178 | 0                      | 1                | 0                 | Cytochrome P450 81D1 (1)                                          | heme binding [GO:0020037 molecular_function] (1); iron ion binding [GO:0005506 molecular_function] (1); oxidoreductase activity, acting on paired donors, with incorporation or reduction of molecular oxygen [GO:0016765 molecular_function] (1); oxidation-reduction process [GO:0055114 biological_process] (1) | Cytochrome P450 [IPRO1128] (1); Cytochrome P450, F-class, group I [IPRO20401] (1); Cytochrome P450, conserved site [IPRO17922] (1)                                                                                                                                                                                                                     |                           | C_umhiu_00434_mRNA_1.1  | -                    |
| GF0037177 | 0                      | 1                | 0                 | Hypothetical protein (1)                                          | nucleotide-sugar transport [GO:0015780 biological_process] (1); Golgi apparatus [GO:0005794 cellular_component] (1)                                                                                                                                                                                                | GDP-mannose transporter GONST3, plant [IPRO29663] (1)                                                                                                                                                                                                                                                                                                  |                           | C_umhiu_00433_mRNA_7.1  | -                    |
| GF0037176 | 0                      | 1                | 0                 | Hypothetical protein (1)                                          |                                                                                                                                                                                                                                                                                                                    |                                                                                                                                                                                                                                                                                                                                                        |                           | C_umhiu_00433_mRNA_25.1 | -                    |
| GF0037175 | 0                      | 1                | 0                 | Hypothetical protein (1)                                          |                                                                                                                                                                                                                                                                                                                    |                                                                                                                                                                                                                                                                                                                                                        |                           | C_umhiu_00433_mRNA_21.1 | -                    |
| GF0037174 | 0                      | 1                | 0                 | Small heat shock protein (1)                                      |                                                                                                                                                                                                                                                                                                                    | Small heat shock protein HSP20 [IPRO1107] (1); Alpha-crystallin Hsp20 domain [IPRO2068] (1); HSP20-like chaperone [IPRO08978] (1)                                                                                                                                                                                                                      |                           | C_umhiu_00433_mRNA_20.1 | -                    |
| GF0037173 | 0                      | 1                | 0                 | Hypothetical protein (1)                                          |                                                                                                                                                                                                                                                                                                                    |                                                                                                                                                                                                                                                                                                                                                        |                           | C_umhiu_00433_mRNA_1.1  | -                    |
| GF0037172 | 0                      | 1                | 0                 | Hypothetical protein (1)                                          | ADP binding [GO:0043531 molecular_function] (1)                                                                                                                                                                                                                                                                    | P-loop containing nucleoside triphosphate hydrolase [IPRO27417] (1); NB-ARC [IPRO2182] (1)                                                                                                                                                                                                                                                             |                           | C_umhiu_00432_mRNA_9.1  | -                    |
| GF0037171 | 0                      | 1                | 0                 | Hypothetical protein (1)                                          |                                                                                                                                                                                                                                                                                                                    | Leucine-rich repeat domain, L domain-like [IPRO12675] (1)                                                                                                                                                                                                                                                                                              |                           | C_umhiu_00432_mRNA_8.1  | -                    |
| GF0037170 | 0                      | 1                | 0                 | Hypothetical protein (1)                                          |                                                                                                                                                                                                                                                                                                                    | Glutamine amidotransferase type 2 domain [IPRO17922] (1); Nucleophilic aminoalcoholases, N-terminal [IPRO29055] (1)                                                                                                                                                                                                                                    |                           | C_umhiu_00432_mRNA_7.1  | -                    |
| GF0037169 | 0                      | 1                | 0                 | Amino-phosphoribosyltransferase (1)                               | nucleoside metabolic process [GO:0009116 biological_process] (1)                                                                                                                                                                                                                                                   | Phosphoribosyltransferase-like [IPRO29057] (1); Phosphoribosyltransferase domain [IPRO06836] (1)                                                                                                                                                                                                                                                       |                           | C_umhiu_00432_mRNA_6.1  | -                    |
| GF0037168 | 0                      | 1                | 0                 | Hypothetical protein (1)                                          |                                                                                                                                                                                                                                                                                                                    | Ribosomal protein L2 domain 2 [IPRO14722] (1); Domain of unknown function DUF4218 [IPRO25452] (1); Transition protein SH3-like domain [IPRO08919] (1)                                                                                                                                                                                                  |                           | C_umhiu_00432_mRNA_5.1  | -                    |
| GF0037167 | 0                      | 1                | 0                 | Hypothetical protein (1)                                          |                                                                                                                                                                                                                                                                                                                    | DNA-binding pseudorepeat domain [IPRO15300] (1)                                                                                                                                                                                                                                                                                                        |                           | C_umhiu_00432_mRNA_18.1 | -                    |
| GF0037166 | 0                      | 1                | 0                 | Hypothetical protein (1)                                          |                                                                                                                                                                                                                                                                                                                    | Leucine-rich repeat domain, L domain-like [IPRO12675] (1)                                                                                                                                                                                                                                                                                              |                           | C_umhiu_00432_mRNA_16.1 | -                    |
| GF0037165 | 0                      | 1                | 0                 | Hypothetical protein (1)                                          |                                                                                                                                                                                                                                                                                                                    | Leucine-rich repeat domain, L domain-like [IPRO12675] (1)                                                                                                                                                                                                                                                                                              |                           | C_umhiu_00432_mRNA_15.1 | -                    |
| GF0037164 | 0                      | 1                | 0                 | Hypothetical protein (1)                                          |                                                                                                                                                                                                                                                                                                                    | Leucine-rich repeat domain, L domain-like [IPRO12675] (1)                                                                                                                                                                                                                                                                                              |                           | C_umhiu_00432_mRNA_14.1 | -                    |
| GF0037163 | 0                      | 1                | 0                 | Hypothetical protein (1)                                          |                                                                                                                                                                                                                                                                                                                    | Leucine-rich repeat domain, L domain-like [IPRO12675] (1)                                                                                                                                                                                                                                                                                              |                           | C_umhiu_00432_mRNA_13.1 | -                    |
| GF0037162 | 0                      | 1                | 0                 | Hypothetical protein (1)                                          |                                                                                                                                                                                                                                                                                                                    | Leucine-rich repeat domain, L domain-like [IPRO12675] (1)                                                                                                                                                                                                                                                                                              |                           | C_umhiu_00432_mRNA_12.1 | -                    |
| GF0037161 | 0                      | 1                | 0                 | Disease resistance protein RPS2, putative (1)                     | ADP binding [GO:0043531 molecular_function] (1)                                                                                                                                                                                                                                                                    | NB-ARC [IPRO2182] (1); P-loop containing nucleoside triphosphate hydrolase [IPRO27417] (1); Leucine-rich repeat domain, L domain-like [IPRO12675] (1)                                                                                                                                                                                                  |                           | C_umhiu_00432_mRNA_11.1 | -                    |
| GF0037160 | 0                      | 1                | 0                 | Hypothetical protein (1)                                          |                                                                                                                                                                                                                                                                                                                    |                                                                                                                                                                                                                                                                                                                                                        |                           | C_umhiu_00432_mRNA_1.1  | -                    |
| GF0037159 | 0                      | 1                | 0                 | Hypothetical protein (1)                                          |                                                                                                                                                                                                                                                                                                                    |                                                                                                                                                                                                                                                                                                                                                        |                           | C_umhiu_00431_mRNA_5.1  | -                    |
| GF0037158 | 0                      | 1                | 0                 | Cytosine thioester P-amphiphosphate phosphoribosyltransferase (1) |                                                                                                                                                                                                                                                                                                                    | LOG family [IPRO31100] (1)                                                                                                                                                                                                                                                                                                                             |                           | C_umhiu_00431_mRNA_3.1  | -                    |
| GF0037157 | 0                      | 1                | 0                 | Hypothetical protein (1)                                          |                                                                                                                                                                                                                                                                                                                    |                                                                                                                                                                                                                                                                                                                                                        |                           | C_umhiu_00431_mRNA_24.1 | -                    |
| GF0037156 | 0                      | 1                | 0                 | Hypothetical protein (1)                                          |                                                                                                                                                                                                                                                                                                                    |                                                                                                                                                                                                                                                                                                                                                        |                           | C_umhiu_00431_mRNA_21.1 | -                    |
| GF0037155 | 0                      | 1                | 0                 | Hypothetical protein (1)                                          |                                                                                                                                                                                                                                                                                                                    | Reverse transcriptase, RNA-dependent DNA polymerase [IPRO13103] (1)                                                                                                                                                                                                                                                                                    |                           | C_umhiu_00431_mRNA_2.1  | -                    |
| GF0037154 | 0                      | 1                | 0                 | Hypothetical protein (1)                                          | proteolysis [GO:0006508 biological_process] (1); cysteine-type peptidase activity [GO:0008234 molecular_function] (1); nucleic acid binding [GO:0003676 molecular_function] (1); zinc ion binding [GO:0008270 molecular_function] (1)                                                                              | Ulp1 protease family, C-terminal catalytic domain [IPRO00653] (1)                                                                                                                                                                                                                                                                                      |                           | C_umhiu_00431_mRNA_15.1 | -                    |
| GF0037153 | 0                      | 1                | 0                 | Hypothetical protein (1)                                          |                                                                                                                                                                                                                                                                                                                    | Zinc finger, CCHC-type [IPRO01878] (1)                                                                                                                                                                                                                                                                                                                 |                           | C_umhiu_00431_mRNA_14.1 | -                    |
| GF0037152 | 0                      | 1                | 0                 | Hypothetical protein (1)                                          |                                                                                                                                                                                                                                                                                                                    |                                                                                                                                                                                                                                                                                                                                                        |                           | C_umhiu_00431_mRNA_12.1 | -                    |
| GF0037151 | 0                      | 1                | 0                 | Hypothetical protein (1)                                          |                                                                                                                                                                                                                                                                                                                    |                                                                                                                                                                                                                                                                                                                                                        |                           | C_umhiu_00430_mRNA_3.1  | -                    |
| GF0037150 | 0                      | 1                | 0                 | Hypothetical protein (1)                                          |                                                                                                                                                                                                                                                                                                                    |                                                                                                                                                                                                                                                                                                                                                        |                           | C_umhiu_00430_mRNA_2.1  | -                    |
| GF0037149 | 0                      | 1                | 0                 | Hypothetical protein (1)                                          |                                                                                                                                                                                                                                                                                                                    |                                                                                                                                                                                                                                                                                                                                                        |                           | C_umhiu_00429_mRNA_11.1 | -                    |
| GF0037148 | 0                      | 1                | 0                 | Hypothetical protein (1)                                          |                                                                                                                                                                                                                                                                                                                    |                                                                                                                                                                                                                                                                                                                                                        |                           | C_umhiu_00429_mRNA_9.1  | -                    |
| GF0037147 | 0                      | 1                | 0                 | Hypothetical protein (1)                                          |                                                                                                                                                                                                                                                                                                                    |                                                                                                                                                                                                                                                                                                                                                        |                           | C_umhiu_00429_mRNA_8.1  | -                    |
| GF0037146 | 0                      | 1                | 0                 | Hypothetical protein (1)                                          |                                                                                                                                                                                                                                                                                                                    |                                                                                                                                                                                                                                                                                                                                                        |                           | C_umhiu_00429_mRNA_24.1 | -                    |
| GF0037145 | 0                      | 1                | 0                 | Hypothetical protein (1)                                          | protein binding [GO:0005515 molecular_function] (1)                                                                                                                                                                                                                                                                | WD40/VVTN repeat-like-containing domain [IPRO19543] (1); WD40-repeat-containing domain [IPRO17960] (1)                                                                                                                                                                                                                                                 |                           | C_umhiu_00429_mRNA_2.1  | -                    |
| GF0037144 | 0                      | 1                | 0                 | Hypothetical protein (1)                                          |                                                                                                                                                                                                                                                                                                                    |                                                                                                                                                                                                                                                                                                                                                        |                           | C_umhiu_00428_mRNA_9.1  | -                    |
| GF0037143 | 0                      | 1                | 0                 | Hypothetical protein (1)                                          |                                                                                                                                                                                                                                                                                                                    |                                                                                                                                                                                                                                                                                                                                                        |                           | C_umhiu_00428_mRNA_30.1 | -                    |
| GF0037142 | 0                      | 1                | 0                 | BTB/POZ ankyrin repeat protein (1)                                | protein binding [GO:0005515 molecular_function] (1)                                                                                                                                                                                                                                                                | Ankyrin repeat [IPRO02110] (1); SKP1/ BTB/POZ domain [IPRO11333] (1); Regulatory protein NPR, central domain [IPRO24229] (1); Ankyrin repeat-containing domain [IPRO20683] (1); BTB/POZ domain [IPRO00210] (1)                                                                                                                                         |                           | C_umhiu_00428_mRNA_26.1 | -                    |
| GF0037141 | 0                      | 1                | 0                 | Hypothetical protein (1)                                          |                                                                                                                                                                                                                                                                                                                    |                                                                                                                                                                                                                                                                                                                                                        |                           | C_umhiu_00428_mRNA_23.1 | -                    |
| GF0037140 | 0                      | 1                | 0                 | BTB/POZ domain containing protein, expressed (1)                  | protein binding [GO:0005515 molecular_function] (1)                                                                                                                                                                                                                                                                | NPRI/NIM1-like, C-terminal [IPRO21094] (1); Ankyrin repeat-containing domain [IPRO20683] (1); Ankyrin repeat [IPRO02110] (1)                                                                                                                                                                                                                           |                           | C_umhiu_00428_mRNA_22.1 | -                    |
| GF0037139 | 0                      | 1                | 0                 | Hypothetical protein (1)                                          |                                                                                                                                                                                                                                                                                                                    | Regulatory protein NPR, central domain [IPRO24229] (1)                                                                                                                                                                                                                                                                                                 |                           | C_umhiu_00428_mRNA_21.1 | -                    |
| GF0037138 | 0                      | 1                | 0                 | Hypothetical protein (1)                                          | zinc ion binding [GO:0008270 molecular_function] (1); protein binding [GO:0005515 molecular_function] (1)                                                                                                                                                                                                          | Ankyrin repeat-containing domain [IPRO20683] (1); NPRI/NIM1-like, C-terminal [IPRO21094] (1); Transposase, MuDR, plant [IPRO4332] (1); MULE transposase domain [IPRO18289] (1); Zinc finger, PAM2-type [IPRO06564] (1); Regulatory protein NPR, central domain [IPRO24229] (1); Zinc finger, SWIM-type [IPRO02110] (1); Ankyrin repeat [IPRO02110] (1) |                           | C_umhiu_00428_mRNA_19.1 | -                    |
| GF0037137 | 0                      | 1                | 0                 | Hypothetical protein (1)                                          |                                                                                                                                                                                                                                                                                                                    | LOG family [IPRO31100] (1)                                                                                                                                                                                                                                                                                                                             |                           | C_umhiu_00428_mRNA_13.1 | -                    |
| GF0037136 | 0                      | 1                | 0                 | Hypothetical protein (1)                                          |                                                                                                                                                                                                                                                                                                                    |                                                                                                                                                                                                                                                                                                                                                        |                           | C_umhiu_00428_mRNA_11.1 | -                    |
| GF0037135 | 0                      | 1                | 0                 | Hypothetical protein (1)                                          |                                                                                                                                                                                                                                                                                                                    | Retrotroposome gag domain [IPRO05162] (1)                                                                                                                                                                                                                                                                                                              |                           | C_umhiu_00427_mRNA_6.1  | -                    |
| GF0037134 | 0                      | 1                | 0                 | Hypothetical protein (1)                                          |                                                                                                                                                                                                                                                                                                                    |                                                                                                                                                                                                                                                                                                                                                        |                           | C_umhiu_00427_mRNA_5.1  | -                    |
| GF0037133 | 0                      | 1                | 0                 | Hypothetical protein (1)                                          |                                                                                                                                                                                                                                                                                                                    |                                                                                                                                                                                                                                                                                                                                                        |                           | C_umhiu_00427_mRNA_4.1  | -                    |
| GF0037132 | 0                      | 1                | 0                 | Hypothetical protein (1)                                          |                                                                                                                                                                                                                                                                                                                    |                                                                                                                                                                                                                                                                                                                                                        |                           | C_umhiu_00427_mRNA_3.1  | -                    |
| GF0037131 | 0                      | 1                | 0                 | Hypothetical protein (1)                                          |                                                                                                                                                                                                                                                                                                                    |                                                                                                                                                                                                                                                                                                                                                        |                           | C_umhiu_00427_mRNA_24.1 | -                    |
| GF0037130 | 0                      | 1                | 0                 | Putative muDR family transposase-like (1)                         | zinc ion binding [GO:0008270 molecular_function] (1)                                                                                                                                                                                                                                                               | Zinc finger, PAM2-type [IPRO06564] (1); MULE transposase domain [IPRO18289] (1)                                                                                                                                                                                                                                                                        |                           | C_umhiu_00427_mRNA_23.1 | -                    |
| GF0037129 | 0                      | 1                | 0                 | Alfa DNaRNA-binding protein (1)                                   | nucleic acid binding [GO:0003676 molecular_function] (1)                                                                                                                                                                                                                                                           | DNA RNA-binding protein alpha-like [IPRO02775] (1); Uncharacterized conserved protein UCPO333, DNA RNA-binding Alfa-related [IPRO14506] (1)                                                                                                                                                                                                            |                           | C_umhiu_00427_mRNA_22.1 | -                    |
| GF0037128 | 0                      | 1                | 0                 | Hypothetical protein (1)                                          |                                                                                                                                                                                                                                                                                                                    |                                                                                                                                                                                                                                                                                                                                                        |                           | C_umhiu_00427_mRNA_2.1  | -                    |
| GF0037127 | 0                      | 1                | 0                 | Hypothetical protein (1)                                          |                                                                                                                                                                                                                                                                                                                    | HSP20-like chaperone [IPRO08978] (1); Alpha-crystallin Hsp20 domain [IPRO2066] (1)                                                                                                                                                                                                                                                                     |                           | C_umhiu_00427_mRNA_18.1 | -                    |
| GF0037126 | 0                      | 1                | 0                 | Hypothetical protein (1)                                          |                                                                                                                                                                                                                                                                                                                    |                                                                                                                                                                                                                                                                                                                                                        |                           | C_umhiu_00427_mRNA_14.1 | -                    |
| GF0037125 | 0                      | 1                | 0                 | Hypothetical protein (1)                                          | DNA binding [GO:0003677 molecular_function] (1); oxidoreductase activity [GO:0016491 molecular_function] (1); regulation of transcription, DNA-templated [GO:0006355 biological_process] (1); metabolic process [GO:0008152 biological_process] (1)                                                                | NAC domain [IPRO03441] (1); NAD(P)-binding domain [IPRO16408] (1); Glucose/ribitol dehydrogenase [IPRO02347] (1); Short-chain dehydrogenase/dehydrogenase, conserved site [IPRO20984] (1); Short-chain dehydrogenase/dehydrogenase SDR [IPRO02198] (1)                                                                                                 |                           | C_umhiu_00426_mRNA_9.1  | -                    |
| GF0037124 | 0                      | 1                | 0                 | Hypothetical protein (1)                                          |                                                                                                                                                                                                                                                                                                                    |                                                                                                                                                                                                                                                                                                                                                        |                           | C_umhiu_00426_mRNA_3.1  | -                    |





| ID       | Num. in <i>C. crotolariae</i> | Num. in <i>C. canalis</i> | Num. in <i>P. putida</i> | Note                                                      | GO                                                                                                                                                                                                                                                                                                                 | InterPro                                                                                                                                                                | Members in <i>C. crotolariae</i> | Members in <i>C. canalis</i> | Members in <i>P. putida</i> |
|----------|-------------------------------|---------------------------|--------------------------|-----------------------------------------------------------|--------------------------------------------------------------------------------------------------------------------------------------------------------------------------------------------------------------------------------------------------------------------------------------------------------------------|-------------------------------------------------------------------------------------------------------------------------------------------------------------------------|----------------------------------|------------------------------|-----------------------------|
| GF007054 | 0                             | 1                         | 0                        | Hypothetical protein (1)                                  | ADP binding [GO:004531 molecular_function] (1)                                                                                                                                                                                                                                                                     | Winged helix-turn-helix DNA-binding domain [IPR019911] (1); P-loop containing nucleoside triphosphate hydrolase [IPR027417] (1); NB-ARC [IPR02182] (1)                  | -                                | C_unihit_00415_mRNA_14.1     | -                           |
| GF007053 | 0                             | 1                         | 0                        | Hypothetical protein (1)                                  | -                                                                                                                                                                                                                                                                                                                  | -                                                                                                                                                                       | -                                | C_unihit_00415_mRNA_12.1     | -                           |
| GF007052 | 0                             | 1                         | 0                        | Hypothetical protein (1)                                  | -                                                                                                                                                                                                                                                                                                                  | -                                                                                                                                                                       | -                                | C_unihit_00415_mRNA_1.1      | -                           |
| GF007051 | 0                             | 1                         | 0                        | Hypothetical protein (1)                                  | nucleic acid binding [GO:0003676 molecular_function] (1)                                                                                                                                                                                                                                                           | Ribonuclease H-like domain [IPR012337] (1)                                                                                                                              | -                                | C_unihit_00414_mRNA_9.1      | -                           |
| GF007050 | 0                             | 1                         | 0                        | Serine/threonine-protein kinase ULK3 (1)                  | protein kinase activity [GO:0004672 molecular_function] (1); protein phosphorylation [GO:0006468 biological_process] (1); ATP binding [GO:0005524 molecular_function] (1)                                                                                                                                          | Protein kinase domain [IPR000719] (1); Protein kinase-like domain [IPR011099] (1); Serine/threonine dual specificity protein kinase, catalytic domain [IPR002960] (1)   | -                                | C_unihit_00414_mRNA_8.1      | -                           |
| GF007049 | 0                             | 1                         | 0                        | Hypothetical protein (1)                                  | -                                                                                                                                                                                                                                                                                                                  | -                                                                                                                                                                       | -                                | C_unihit_00414_mRNA_29.1     | -                           |
| GF007048 | 0                             | 1                         | 0                        | RING-H2 finger protein ATL78 (1)                          | zinc ion binding [GO:0008270 molecular_function] (1); protein binding [GO:0005515 molecular_function] (1)                                                                                                                                                                                                          | Zinc finger, RING-FYVE/PHD-type [IPR013083] (1); Zinc finger, RING-type [IPR018413] (1)                                                                                 | -                                | C_unihit_00414_mRNA_24.1     | -                           |
| GF007047 | 0                             | 1                         | 0                        | Hypothetical protein (1)                                  | ATP binding [GO:0005524 molecular_function] (1); protein phosphorylation [GO:0006468 biological_process] (1); protein kinase activity [GO:0004672 molecular_function] (1)                                                                                                                                          | Serine/threonine-protein kinase, active site [IPR008271] (1); Protein kinase-like domain [IPR011099] (1); Protein kinase domain [IPR000719] (1)                         | -                                | C_unihit_00414_mRNA_20.1     | -                           |
| GF007046 | 0                             | 1                         | 0                        | Hypothetical protein (1)                                  | -                                                                                                                                                                                                                                                                                                                  | -                                                                                                                                                                       | -                                | C_unihit_00414_mRNA_19.1     | -                           |
| GF007045 | 0                             | 1                         | 0                        | Hypothetical protein (1)                                  | -                                                                                                                                                                                                                                                                                                                  | -                                                                                                                                                                       | -                                | C_unihit_00414_mRNA_17.1     | -                           |
| GF007044 | 0                             | 1                         | 0                        | Hypothetical protein (1)                                  | -                                                                                                                                                                                                                                                                                                                  | -                                                                                                                                                                       | -                                | C_unihit_00414_mRNA_1.1      | -                           |
| GF007043 | 0                             | 1                         | 0                        | Hypothetical protein (1)                                  | -                                                                                                                                                                                                                                                                                                                  | -                                                                                                                                                                       | -                                | C_unihit_00413_mRNA_9.1      | -                           |
| GF007042 | 0                             | 1                         | 0                        | Hypothetical protein (1)                                  | -                                                                                                                                                                                                                                                                                                                  | -                                                                                                                                                                       | -                                | C_unihit_00413_mRNA_6.1      | -                           |
| GF007041 | 0                             | 1                         | 0                        | Hypothetical protein (1)                                  | -                                                                                                                                                                                                                                                                                                                  | -                                                                                                                                                                       | -                                | C_unihit_00413_mRNA_3.1      | -                           |
| GF007040 | 0                             | 1                         | 0                        | Hypothetical protein (1)                                  | -                                                                                                                                                                                                                                                                                                                  | -                                                                                                                                                                       | -                                | C_unihit_00413_mRNA_25.1     | -                           |
| GF007039 | 0                             | 1                         | 0                        | Hypothetical protein (1)                                  | -                                                                                                                                                                                                                                                                                                                  | -                                                                                                                                                                       | -                                | C_unihit_00413_mRNA_17.1     | -                           |
| GF007038 | 0                             | 1                         | 0                        | Hypothetical protein (1)                                  | -                                                                                                                                                                                                                                                                                                                  | -                                                                                                                                                                       | -                                | C_unihit_00413_mRNA_16.1     | -                           |
| GF007037 | 0                             | 1                         | 0                        | Hypothetical protein (1)                                  | -                                                                                                                                                                                                                                                                                                                  | -                                                                                                                                                                       | -                                | C_unihit_00413_mRNA_13.1     | -                           |
| GF007036 | 0                             | 1                         | 0                        | Hypothetical protein (1)                                  | -                                                                                                                                                                                                                                                                                                                  | -                                                                                                                                                                       | -                                | C_unihit_00413_mRNA_12.1     | -                           |
| GF007035 | 0                             | 1                         | 0                        | Protein FAM63A (1)                                        | -                                                                                                                                                                                                                                                                                                                  | -                                                                                                                                                                       | -                                | C_unihit_00412_mRNA_7.1      | -                           |
| GF007034 | 0                             | 1                         | 0                        | Hypothetical protein (1)                                  | -                                                                                                                                                                                                                                                                                                                  | -                                                                                                                                                                       | -                                | C_unihit_00412_mRNA_4.1      | -                           |
| GF007033 | 0                             | 1                         | 0                        | Hypothetical protein (1)                                  | -                                                                                                                                                                                                                                                                                                                  | -                                                                                                                                                                       | -                                | C_unihit_00412_mRNA_3.1      | -                           |
| GF007032 | 0                             | 1                         | 0                        | Hypothetical protein (1)                                  | nucleus [GO:0005634 cellular_component] (1); developmental process [GO:0032502 biological_process] (1); transcription, DNA-templated [GO:0006351 biological_process] (1)                                                                                                                                           | WRC domain [IPR014977] (1); Growth-regulating factor [IPR031137] (1)                                                                                                    | -                                | C_unihit_00412_mRNA_28.1     | -                           |
| GF007031 | 0                             | 1                         | 0                        | Hypothetical protein (1)                                  | nucleus [GO:0005634 cellular_component] (1); ATP binding [GO:0005524 molecular_function] (1); developmental process [GO:0032502 biological_process] (1); transcription, DNA-templated [GO:0006351 biological_process] (1); regulation of transcription, DNA-templated [GO:0006355 biological_process] (1)          | Glutamine-Lysine-Glutamine, QLQ [IPR014978] (1); Growth-regulating factor [IPR031137] (1)                                                                               | -                                | C_unihit_00412_mRNA_27.1     | -                           |
| GF007030 | 0                             | 1                         | 0                        | Hypothetical protein (1)                                  | -                                                                                                                                                                                                                                                                                                                  | -                                                                                                                                                                       | -                                | C_unihit_00412_mRNA_18.1     | -                           |
| GF007029 | 0                             | 1                         | 0                        | Hypothetical protein (1)                                  | -                                                                                                                                                                                                                                                                                                                  | -                                                                                                                                                                       | -                                | C_unihit_00411_mRNA_25.1     | -                           |
| GF007028 | 0                             | 1                         | 0                        | Hypothetical protein (1)                                  | -                                                                                                                                                                                                                                                                                                                  | -                                                                                                                                                                       | -                                | C_unihit_00411_mRNA_21.1     | -                           |
| GF007027 | 0                             | 1                         | 0                        | Phosphate transporter (1)                                 | transmembrane transport [GO:0055085 biological_process] (1); transmembrane transporter activity [GO:0022857 molecular_function] (1); integral component of membrane [GO:0016021 cellular_component] (1)                                                                                                            | Major facilitator, sugar transporter-like [IPR005829] (1); Major facilitator superfamily domain [IPR020866] (1)                                                         | -                                | C_unihit_00411_mRNA_16.1     | -                           |
| GF007026 | 0                             | 1                         | 0                        | Hypothetical protein (1)                                  | -                                                                                                                                                                                                                                                                                                                  | -                                                                                                                                                                       | -                                | C_unihit_00410_mRNA_9.1      | -                           |
| GF007025 | 0                             | 1                         | 0                        | Hypothetical protein (1)                                  | -                                                                                                                                                                                                                                                                                                                  | -                                                                                                                                                                       | -                                | C_unihit_00410_mRNA_3.1      | -                           |
| GF007024 | 0                             | 1                         | 0                        | Hypothetical protein (1)                                  | DNA binding [GO:0003677 molecular_function] (1)                                                                                                                                                                                                                                                                    | Zinc finger, BED-type [IPR036566] (1)                                                                                                                                   | -                                | C_unihit_00410_mRNA_21.1     | -                           |
| GF007023 | 0                             | 1                         | 0                        | Hypothetical protein (1)                                  | -                                                                                                                                                                                                                                                                                                                  | -                                                                                                                                                                       | -                                | C_unihit_00410_mRNA_20.1     | -                           |
| GF007022 | 0                             | 1                         | 0                        | Hypothetical protein (1)                                  | -                                                                                                                                                                                                                                                                                                                  | -                                                                                                                                                                       | -                                | C_unihit_00410_mRNA_17.1     | -                           |
| GF007021 | 0                             | 1                         | 0                        | Hypothetical protein (1)                                  | -                                                                                                                                                                                                                                                                                                                  | -                                                                                                                                                                       | -                                | C_unihit_00410_mRNA_16.1     | -                           |
| GF007020 | 0                             | 1                         | 0                        | Hypothetical protein (1)                                  | -                                                                                                                                                                                                                                                                                                                  | -                                                                                                                                                                       | -                                | C_unihit_00410_mRNA_15.1     | -                           |
| GF007019 | 0                             | 1                         | 0                        | Hypothetical protein (1)                                  | nucleic acid binding [GO:0003676 molecular_function] (1)                                                                                                                                                                                                                                                           | Peptidase M20, dimerization domain [IPR011650] (1)                                                                                                                      | -                                | C_unihit_00410_mRNA_14.1     | -                           |
| GF007018 | 0                             | 1                         | 0                        | Hypothetical protein (1)                                  | -                                                                                                                                                                                                                                                                                                                  | -                                                                                                                                                                       | -                                | C_unihit_00410_mRNA_12.1     | -                           |
| GF007017 | 0                             | 1                         | 0                        | Hypothetical protein (1)                                  | protein binding [GO:0005515 molecular_function] (1)                                                                                                                                                                                                                                                                | Askyrin repeat-containing domain [IPR020683] (1); PGG domain [IPR020961] (1); Askyrin repeat [IPR021101] (1); Reverse transcriptase zinc-binding domain [IPR039960] (1) | -                                | C_unihit_00410_mRNA_11.1     | -                           |
| GF007016 | 0                             | 1                         | 0                        | DNase I-like superfamily protein (1)                      | oxidoreductase activity, acting on paired donors, with incorporation or reduction of molecular oxygen [GO:0016789 molecular_function] (1); oxidation-reduction process [GO:0005114 biological_process] (1); iron ion binding [GO:0005506 molecular_function] (1); heme binding [GO:0020037 molecular_function] (1) | Endonuclease/exonuclease/phosphatase [IPR005135] (1); Reverse transcriptase domain [IPR000477] (1)                                                                      | -                                | C_unihit_00410_mRNA_10.1     | -                           |
| GF007015 | 0                             | 1                         | 0                        | Flavone synthase II (1)                                   | -                                                                                                                                                                                                                                                                                                                  | -                                                                                                                                                                       | -                                | C_unihit_00410_mRNA_1.1      | -                           |
| GF007014 | 0                             | 1                         | 0                        | Hypothetical protein (1)                                  | aspartic-type endopeptidase activity [GO:0044190 molecular_function] (1); zinc ion binding [GO:0008270 molecular_function] (1); proteolysis [GO:0006508 biological_process] (1); nucleic acid binding [GO:0003676 molecular_function] (1)                                                                          | Cytochrome P450 [IPR01128] (1); Cytochrome P450, conserved site [IPR017972] (1); Cytochrome P450, E-class, group I [IPR002401] (1)                                      | -                                | C_unihit_00409_mRNA_26.1     | -                           |
| GF007013 | 0                             | 1                         | 0                        | Cell division protease flh-like protein, chloroplast (1)  | ATP binding [GO:0005524 molecular_function] (1); proteolysis [GO:0006508 biological_process] (1); metalloprotease activity [GO:0044232 molecular_function] (1)                                                                                                                                                     | Zinc finger, CCHC-type [IPR001878] (1); Aspartic peptidase, active site [IPR001969] (1)                                                                                 | -                                | C_unihit_00409_mRNA_21.1     | -                           |
| GF007012 | 0                             | 1                         | 0                        | Hypothetical protein (1)                                  | -                                                                                                                                                                                                                                                                                                                  | -                                                                                                                                                                       | -                                | C_unihit_00409_mRNA_16.1     | -                           |
| GF007011 | 0                             | 1                         | 0                        | Hypothetical protein (1)                                  | -                                                                                                                                                                                                                                                                                                                  | -                                                                                                                                                                       | -                                | C_unihit_00409_mRNA_13.1     | -                           |
| GF007010 | 0                             | 1                         | 0                        | Hypothetical protein (1)                                  | -                                                                                                                                                                                                                                                                                                                  | -                                                                                                                                                                       | -                                | C_unihit_00408_mRNA_8.1      | -                           |
| GF007009 | 0                             | 1                         | 0                        | Hypothetical protein (1)                                  | -                                                                                                                                                                                                                                                                                                                  | -                                                                                                                                                                       | -                                | C_unihit_00408_mRNA_7.1      | -                           |
| GF007008 | 0                             | 1                         | 0                        | Hypothetical protein (1)                                  | -                                                                                                                                                                                                                                                                                                                  | -                                                                                                                                                                       | -                                | C_unihit_00408_mRNA_29.1     | -                           |
| GF007007 | 0                             | 1                         | 0                        | Hypothetical protein (1)                                  | -                                                                                                                                                                                                                                                                                                                  | -                                                                                                                                                                       | -                                | C_unihit_00408_mRNA_27.1     | -                           |
| GF007006 | 0                             | 1                         | 0                        | Hypothetical protein (1)                                  | -                                                                                                                                                                                                                                                                                                                  | -                                                                                                                                                                       | -                                | C_unihit_00408_mRNA_25.1     | -                           |
| GF007005 | 0                             | 1                         | 0                        | Hypothetical protein (1)                                  | -                                                                                                                                                                                                                                                                                                                  | -                                                                                                                                                                       | -                                | C_unihit_00408_mRNA_24.1     | -                           |
| GF007004 | 0                             | 1                         | 0                        | Hypothetical protein (1)                                  | -                                                                                                                                                                                                                                                                                                                  | -                                                                                                                                                                       | -                                | C_unihit_00408_mRNA_22.1     | -                           |
| GF007003 | 0                             | 1                         | 0                        | Hypothetical protein (1)                                  | -                                                                                                                                                                                                                                                                                                                  | -                                                                                                                                                                       | -                                | C_unihit_00408_mRNA_21.1     | -                           |
| GF007002 | 0                             | 1                         | 0                        | Hypothetical protein (1)                                  | multicellular organismal development [GO:0007275 biological_process] (1); regulation of transcription, DNA-templated [GO:0006355 biological_process] (1); transcription factor activity, sequence-specific DNA binding [GO:0003700 molecular_function] (1)                                                         | AP2-like ethylene-responsive transcription factor [IPR011121] (1)                                                                                                       | -                                | C_unihit_00408_mRNA_20.1     | -                           |
| GF007001 | 0                             | 1                         | 0                        | Hypothetical protein (1)                                  | -                                                                                                                                                                                                                                                                                                                  | -                                                                                                                                                                       | -                                | C_unihit_00408_mRNA_2.1      | -                           |
| GF007000 | 0                             | 1                         | 0                        | Hypothetical protein (1)                                  | -                                                                                                                                                                                                                                                                                                                  | -                                                                                                                                                                       | -                                | C_unihit_00408_mRNA_18.1     | -                           |
| GF006999 | 0                             | 1                         | 0                        | Hypothetical protein (1)                                  | -                                                                                                                                                                                                                                                                                                                  | -                                                                                                                                                                       | -                                | C_unihit_00408_mRNA_15.1     | -                           |
| GF006998 | 0                             | 1                         | 0                        | Hypothetical protein (1)                                  | -                                                                                                                                                                                                                                                                                                                  | -                                                                                                                                                                       | -                                | C_unihit_00408_mRNA_14.1     | -                           |
| GF006997 | 0                             | 1                         | 0                        | Hypothetical protein (1)                                  | -                                                                                                                                                                                                                                                                                                                  | -                                                                                                                                                                       | -                                | C_unihit_00408_mRNA_13.1     | -                           |
| GF006996 | 0                             | 1                         | 0                        | Hypothetical protein (1)                                  | -                                                                                                                                                                                                                                                                                                                  | -                                                                                                                                                                       | -                                | C_unihit_00407_mRNA_23.1     | -                           |
| GF006995 | 0                             | 1                         | 0                        | Hypothetical protein (1)                                  | transferase activity, transferring acyl groups other than amino-acyl groups [GO:0016747 molecular_function] (1)                                                                                                                                                                                                    | Chloramphenicol acetyltransferase-like domain [IPR023131] (1); Transferase [IPR03480] (1)                                                                               | -                                | C_unihit_00406_mRNA_6.1      | -                           |
| GF006994 | 0                             | 1                         | 0                        | Hypothetical protein (1)                                  | -                                                                                                                                                                                                                                                                                                                  | -                                                                                                                                                                       | -                                | C_unihit_00406_mRNA_4.1      | -                           |
| GF006993 | 0                             | 1                         | 0                        | Hypothetical protein (1)                                  | -                                                                                                                                                                                                                                                                                                                  | -                                                                                                                                                                       | -                                | C_unihit_00406_mRNA_3.1      | -                           |
| GF006992 | 0                             | 1                         | 0                        | Hypothetical protein (1)                                  | -                                                                                                                                                                                                                                                                                                                  | -                                                                                                                                                                       | -                                | C_unihit_00406_mRNA_29.1     | -                           |
| GF006991 | 0                             | 1                         | 0                        | Hypothetical protein (1)                                  | -                                                                                                                                                                                                                                                                                                                  | -                                                                                                                                                                       | -                                | C_unihit_00406_mRNA_27.1     | -                           |
| GF006990 | 0                             | 1                         | 0                        | Hypothetical protein (1)                                  | -                                                                                                                                                                                                                                                                                                                  | -                                                                                                                                                                       | -                                | C_unihit_00406_mRNA_26.1     | -                           |
| GF006989 | 0                             | 1                         | 0                        | Hypothetical protein (1)                                  | -                                                                                                                                                                                                                                                                                                                  | -                                                                                                                                                                       | -                                | C_unihit_00406_mRNA_11.1     | -                           |
| GF006988 | 0                             | 1                         | 0                        | Hypothetical protein (1)                                  | -                                                                                                                                                                                                                                                                                                                  | -                                                                                                                                                                       | -                                | C_unihit_00406_mRNA_10.1     | -                           |
| GF006987 | 0                             | 1                         | 0                        | Hypothetical protein (1)                                  | cysteine-type peptidase activity [GO:000524 molecular_function] (1); proteolysis [GO:0006508 biological_process] (1)                                                                                                                                                                                               | Ulp1 protease family, C-terminal catalytic domain [IPR003653] (1)                                                                                                       | -                                | C_unihit_00406_mRNA_1.1      | -                           |
| GF006986 | 0                             | 1                         | 0                        | Hypothetical protein (1)                                  | -                                                                                                                                                                                                                                                                                                                  | -                                                                                                                                                                       | -                                | C_unihit_00405_mRNA_25.1     | -                           |
| GF006985 | 0                             | 1                         | 0                        | Hypothetical protein (1)                                  | binding [GO:0005488 molecular_function] (1)                                                                                                                                                                                                                                                                        | Armadillo-like helical [IPR011989] (1); Armadillo-type 6& [IPR016024] (1)                                                                                               | -                                | C_unihit_00405_mRNA_23.1     | -                           |
| GF006984 | 0                             | 1                         | 0                        | Hypothetical protein (1)                                  | -                                                                                                                                                                                                                                                                                                                  | -                                                                                                                                                                       | -                                | C_unihit_00405_mRNA_22.1     | -                           |
| GF006983 | 0                             | 1                         | 0                        | Hypothetical protein (1)                                  | -                                                                                                                                                                                                                                                                                                                  | -                                                                                                                                                                       | -                                | C_unihit_00405_mRNA_21.1     | -                           |
| GF006982 | 0                             | 1                         | 0                        | Putative E3 ubiquitin-protein ligase LFN-1 (1)            | ATP binding [GO:0005524 molecular_function] (1)                                                                                                                                                                                                                                                                    | Armadillo-type 6& [IPR016024] (1); Armadillo-like helical [IPR011989] (1)                                                                                               | -                                | C_unihit_00405_mRNA_20.1     | -                           |
| GF006981 | 0                             | 1                         | 0                        | Eukaryotic translation initiation factor 2c, putative (1) | nucleic acid binding [GO:0003676 molecular_function] (1)                                                                                                                                                                                                                                                           | Ribonuclease H-like domain [IPR012337] (1); Pso domain [IPR001165] (1)                                                                                                  | -                                | C_unihit_00405_mRNA_19.1     | -                           |















| ID       | Num. in <i>C. crottensteini</i> | Num. in <i>C. caudata</i> | Num. in <i>P. putidus</i> | Note                                                                   | GO                                                                                                                                                                                                                                                                                                                                                                                                                                                                                                        | InterPro                                                                                                                                                                                                                                                                                                                                                                                                                                                                                                                                                                                                                                        | Members in <i>Crottensteini</i> | Members in <i>Caudata</i> | Members in <i>Putidus</i> |
|----------|---------------------------------|---------------------------|---------------------------|------------------------------------------------------------------------|-----------------------------------------------------------------------------------------------------------------------------------------------------------------------------------------------------------------------------------------------------------------------------------------------------------------------------------------------------------------------------------------------------------------------------------------------------------------------------------------------------------|-------------------------------------------------------------------------------------------------------------------------------------------------------------------------------------------------------------------------------------------------------------------------------------------------------------------------------------------------------------------------------------------------------------------------------------------------------------------------------------------------------------------------------------------------------------------------------------------------------------------------------------------------|---------------------------------|---------------------------|---------------------------|
| GF003648 | 0                               | 1                         | 1                         | 0 Synxain (1)                                                          | vesicle-mediated transport [GO:0016192 biological process] (1); SNAP receptor activity [GO:0005484 molecular_function] (1); intracellular protein transport [GO:0006886 biological_process] (1); protein binding [GO:0005515 molecular_function] (1); membrane [GO:0016020 cellular_component] (1)                                                                                                                                                                                                        | s-SNARE [IPRO10989] (1); Syntaxin/vesicular conserved site [IPRO06012] (1); Target SNARE coiled-coil homology domain [IPRO00727] (1); Syntaxin, N-terminal domain [IPRO06011] (1)                                                                                                                                                                                                                                                                                                                                                                                                                                                               | -                               | C_umhiu_00335_mRNA_14.1   | -                         |
| GF003647 | 0                               | 1                         | 1                         | 0 Hypothetical protein (1)                                             |                                                                                                                                                                                                                                                                                                                                                                                                                                                                                                           | MULE transposase domain [IPRO18289] (1); Zinc finger, PAM2-type [IPRO06564] (1); Transposase, MuDR, plunt [IPRO24313] (1); Zinc finger, SWIM-type [IPRO07527] (1)                                                                                                                                                                                                                                                                                                                                                                                                                                                                               | -                               | C_umhiu_00335_mRNA_12.1   | -                         |
| GF003646 | 0                               | 1                         | 1                         | 0 Mutator-like transposase (1)                                         | zinc ion binding [GO:0008270 molecular_function] (1)                                                                                                                                                                                                                                                                                                                                                                                                                                                      |                                                                                                                                                                                                                                                                                                                                                                                                                                                                                                                                                                                                                                                 | -                               | C_umhiu_00334_mRNA_5.1    | -                         |
| GF003645 | 0                               | 1                         | 1                         | 0 Hypothetical protein (1)                                             |                                                                                                                                                                                                                                                                                                                                                                                                                                                                                                           |                                                                                                                                                                                                                                                                                                                                                                                                                                                                                                                                                                                                                                                 | -                               | C_umhiu_00334_mRNA_4.1    | -                         |
| GF003644 | 0                               | 1                         | 1                         | 0 Hypothetical protein (1)                                             | protein binding [GO:0005515 molecular_function] (1)                                                                                                                                                                                                                                                                                                                                                                                                                                                       | Ankyrin repeat-containing domain [IPRO20683] (1); Ankyrin repeat [IPRO02110] (4)                                                                                                                                                                                                                                                                                                                                                                                                                                                                                                                                                                | -                               | C_umhiu_00334_mRNA_33.1   | -                         |
| GF003643 | 0                               | 1                         | 1                         | 0 Hypothetical protein (1)                                             | oxidoreductase activity [GO:0016491 molecular_function] (1); oxidation-reduction process [GO:0055114 biological_process] (1)                                                                                                                                                                                                                                                                                                                                                                              | Isoopenicillin N synthase-like [IPRO27443] (1); Oxoglutarate iron-dependent dioxygenase [IPRO05123] (1)                                                                                                                                                                                                                                                                                                                                                                                                                                                                                                                                         | -                               | C_umhiu_00334_mRNA_15.1   | -                         |
| GF003642 | 0                               | 1                         | 1                         | 0 Retrotransposon protein, putative, Ty1-coaps subclass (1)            |                                                                                                                                                                                                                                                                                                                                                                                                                                                                                                           | Reverse transcriptase, RNA-dependent DNA polymerase [IPRO13103] (1)                                                                                                                                                                                                                                                                                                                                                                                                                                                                                                                                                                             | -                               | C_umhiu_00334_mRNA_11.1   | -                         |
| GF003641 | 0                               | 1                         | 1                         | 0 Hypothetical protein (1)                                             |                                                                                                                                                                                                                                                                                                                                                                                                                                                                                                           |                                                                                                                                                                                                                                                                                                                                                                                                                                                                                                                                                                                                                                                 | -                               | C_umhiu_00334_mRNA_1.1    | -                         |
| GF003640 | 0                               | 1                         | 1                         | 0 Hypothetical protein (1)                                             | transcription factor activity, sequence-specific, DNA binding [GO:0003700 molecular_function] (1); regulation of transcription, DNA-templated [GO:0006355 biological_process] (1); median [GO:0006344 cellular_component] (1); nucleotide binding [GO:0000166 molecular_function] (1)                                                                                                                                                                                                                     | Regulator of nonsense-mediated decay; UPF3 [IPRO05120] (1); Nucleotide-binding alpha-beta plus domain [IPRO12671] (1); Transcription factor, K-box [IPRO02487] (1)                                                                                                                                                                                                                                                                                                                                                                                                                                                                              | -                               | C_umhiu_00333_mRNA_6.1    | -                         |
| GF003639 | 0                               | 1                         | 1                         | 0 Hypothetical protein (1)                                             | GTP binding [GO:0005525 molecular_function] (1)                                                                                                                                                                                                                                                                                                                                                                                                                                                           | AGI-type guanine nucleotide-binding (G) domain [IPRO06703] (1); P-loop containing nucleoside triphosphate hydrolase [IPRO27417] (4)                                                                                                                                                                                                                                                                                                                                                                                                                                                                                                             | -                               | C_umhiu_00333_mRNA_5.1    | -                         |
| GF003638 | 0                               | 1                         | 1                         | 0 Cytosolic ribonucleic 5'-monophosphate phosphoribosyltransferase (1) |                                                                                                                                                                                                                                                                                                                                                                                                                                                                                                           | LOG family [IPRO31100] (1)                                                                                                                                                                                                                                                                                                                                                                                                                                                                                                                                                                                                                      | -                               | C_umhiu_00333_mRNA_4.1    | -                         |
| GF003637 | 0                               | 1                         | 1                         | 0 Hypothetical protein (1)                                             |                                                                                                                                                                                                                                                                                                                                                                                                                                                                                                           | Powdery mildew resistance protein; RPPW domain [IPRO08080] (1)                                                                                                                                                                                                                                                                                                                                                                                                                                                                                                                                                                                  | -                               | C_umhiu_00333_mRNA_30.1   | -                         |
| GF003636 | 0                               | 1                         | 1                         | 0 Hypothetical protein (1)                                             |                                                                                                                                                                                                                                                                                                                                                                                                                                                                                                           |                                                                                                                                                                                                                                                                                                                                                                                                                                                                                                                                                                                                                                                 | -                               | C_umhiu_00333_mRNA_28.1   | -                         |
| GF003635 | 0                               | 1                         | 1                         | 0 Hypothetical protein (1)                                             |                                                                                                                                                                                                                                                                                                                                                                                                                                                                                                           |                                                                                                                                                                                                                                                                                                                                                                                                                                                                                                                                                                                                                                                 | -                               | C_umhiu_00333_mRNA_26.1   | -                         |
| GF003634 | 0                               | 1                         | 1                         | 0 Hypothetical protein (1)                                             |                                                                                                                                                                                                                                                                                                                                                                                                                                                                                                           | Domain of unknown function DUF4216 [IPRO05312] (1)                                                                                                                                                                                                                                                                                                                                                                                                                                                                                                                                                                                              | -                               | C_umhiu_00333_mRNA_25.1   | -                         |
| GF003633 | 0                               | 1                         | 1                         | 0 AT-hook motif nuclear-localized protein 28 (1)                       |                                                                                                                                                                                                                                                                                                                                                                                                                                                                                                           | PPC domain [IPRO05175] (1)                                                                                                                                                                                                                                                                                                                                                                                                                                                                                                                                                                                                                      | -                               | C_umhiu_00333_mRNA_22.1   | -                         |
| GF003632 | 0                               | 1                         | 1                         | 0 Hypothetical protein (1)                                             | nucleic acid binding [GO:0003676 molecular_function] (1)                                                                                                                                                                                                                                                                                                                                                                                                                                                  | Ribonuclease H-like domain [IPRO12337] (1); Reverse transcriptase zinc-binding domain [IPRO26960] (1)                                                                                                                                                                                                                                                                                                                                                                                                                                                                                                                                           | -                               | C_umhiu_00333_mRNA_20.1   | -                         |
| GF003631 | 0                               | 1                         | 1                         | 0 Hypothetical protein (1)                                             |                                                                                                                                                                                                                                                                                                                                                                                                                                                                                                           | Retrotransposon gag domain [IPRO05162] (1)                                                                                                                                                                                                                                                                                                                                                                                                                                                                                                                                                                                                      | -                               | C_umhiu_00333_mRNA_2.1    | -                         |
| GF003630 | 0                               | 1                         | 1                         | 0 Hypothetical protein (1)                                             |                                                                                                                                                                                                                                                                                                                                                                                                                                                                                                           | Alpha crystallin/Hsp20 domain [IPRO20681] (1); HSP20-like chaperone [IPRO08978] (4)                                                                                                                                                                                                                                                                                                                                                                                                                                                                                                                                                             | -                               | C_umhiu_00333_mRNA_19.1   | -                         |
| GF003629 | 0                               | 1                         | 1                         | 0 Hypothetical protein (1)                                             |                                                                                                                                                                                                                                                                                                                                                                                                                                                                                                           |                                                                                                                                                                                                                                                                                                                                                                                                                                                                                                                                                                                                                                                 | -                               | C_umhiu_00333_mRNA_18.1   | -                         |
| GF003628 | 0                               | 1                         | 1                         | 0 Hypothetical protein (1)                                             | oxidoreductase activity [GO:0016491 molecular_function] (1); oxidation-reduction process [GO:0055114 biological_process] (1)                                                                                                                                                                                                                                                                                                                                                                              | FAD(NAD(P))-binding domain [IPRO23753] (4)                                                                                                                                                                                                                                                                                                                                                                                                                                                                                                                                                                                                      | -                               | C_umhiu_00333_mRNA_17.1   | -                         |
| GF003627 | 0                               | 1                         | 1                         | 0 Hypothetical protein (1)                                             |                                                                                                                                                                                                                                                                                                                                                                                                                                                                                                           |                                                                                                                                                                                                                                                                                                                                                                                                                                                                                                                                                                                                                                                 | -                               | C_umhiu_00333_mRNA_11.1   | -                         |
| GF003626 | 0                               | 1                         | 1                         | 0 Hypothetical protein (1)                                             |                                                                                                                                                                                                                                                                                                                                                                                                                                                                                                           |                                                                                                                                                                                                                                                                                                                                                                                                                                                                                                                                                                                                                                                 | -                               | C_umhiu_00332_mRNA_3.1    | -                         |
| GF003625 | 0                               | 1                         | 1                         | 0 Hypothetical protein (1)                                             |                                                                                                                                                                                                                                                                                                                                                                                                                                                                                                           |                                                                                                                                                                                                                                                                                                                                                                                                                                                                                                                                                                                                                                                 | -                               | C_umhiu_00332_mRNA_27.1   | -                         |
| GF003624 | 0                               | 1                         | 1                         | 0 Hypothetical protein (1)                                             |                                                                                                                                                                                                                                                                                                                                                                                                                                                                                                           |                                                                                                                                                                                                                                                                                                                                                                                                                                                                                                                                                                                                                                                 | -                               | C_umhiu_00332_mRNA_26.1   | -                         |
| GF003623 | 0                               | 1                         | 1                         | 0 Hypothetical protein (1)                                             |                                                                                                                                                                                                                                                                                                                                                                                                                                                                                                           |                                                                                                                                                                                                                                                                                                                                                                                                                                                                                                                                                                                                                                                 | -                               | C_umhiu_00332_mRNA_25.1   | -                         |
| GF003622 | 0                               | 1                         | 1                         | 0 Hypothetical protein (1)                                             | photosystem I reaction center [GO:0009338 cellular_component] (1); photosystem I [GO:0009322 cellular_component] (1); photosynthesis [GO:001979 biological_process] (1); protein binding [GO:0005515 molecular_function] (1)                                                                                                                                                                                                                                                                              | Photosystem I PsaD [IPRO03685] (1); F-box domain [IPRO01810] (1); Leucine-rich repeat domain, L domain-like [IPRO25275] (4)                                                                                                                                                                                                                                                                                                                                                                                                                                                                                                                     | -                               | C_umhiu_00330_mRNA_8.1    | -                         |
| GF003621 | 0                               | 1                         | 1                         | 0 Hypothetical protein (1)                                             |                                                                                                                                                                                                                                                                                                                                                                                                                                                                                                           |                                                                                                                                                                                                                                                                                                                                                                                                                                                                                                                                                                                                                                                 | -                               | C_umhiu_00330_mRNA_4.1    | -                         |
| GF003620 | 0                               | 1                         | 1                         | 0 Hypothetical protein (1)                                             |                                                                                                                                                                                                                                                                                                                                                                                                                                                                                                           | Pentapeptide repeat [IPRO02885] (1)                                                                                                                                                                                                                                                                                                                                                                                                                                                                                                                                                                                                             | -                               | C_umhiu_00330_mRNA_27.1   | -                         |
| GF003619 | 0                               | 1                         | 1                         | 0 Hypothetical protein (1)                                             |                                                                                                                                                                                                                                                                                                                                                                                                                                                                                                           |                                                                                                                                                                                                                                                                                                                                                                                                                                                                                                                                                                                                                                                 | -                               | C_umhiu_00330_mRNA_18.1   | -                         |
| GF003618 | 0                               | 1                         | 1                         | 0 LRR receptor-like kinase family protein (1)                          | protein phosphorylation [GO:0006468 biological_process] (1); protein kinase activity [GO:0004672 molecular_function] (1); ATP binding [GO:0005524 molecular_function] (1)                                                                                                                                                                                                                                                                                                                                 | Protein kinase-like domain [IPRO11009] (1); Leucine-rich repeat domain, L domain-like [IPRO26755] (1); Leucine-rich repeat, typical subtype [IPRO00391] (1); Protein kinase domain [IPRO00719] (1); Leucine-rich repeat-containing N-terminal, plant-type [IPRO13210] (1); Serine/threonine-protein kinase, active site [IPRO08271] (1); Serine/threonine dual specificity protein kinase, catalytic domain [IPRO02290] (1)                                                                                                                                                                                                                     | -                               | C_umhiu_00329_mRNA_8.1    | -                         |
| GF003617 | 0                               | 1                         | 1                         | 0 Hypothetical protein (1)                                             |                                                                                                                                                                                                                                                                                                                                                                                                                                                                                                           |                                                                                                                                                                                                                                                                                                                                                                                                                                                                                                                                                                                                                                                 | -                               | C_umhiu_00329_mRNA_7.1    | -                         |
| GF003616 | 0                               | 1                         | 1                         | 0 Hypothetical protein (1)                                             |                                                                                                                                                                                                                                                                                                                                                                                                                                                                                                           |                                                                                                                                                                                                                                                                                                                                                                                                                                                                                                                                                                                                                                                 | -                               | C_umhiu_00329_mRNA_6.1    | -                         |
| GF003615 | 0                               | 1                         | 1                         | 0 Putative retroelement polypolyprotein (1)                            |                                                                                                                                                                                                                                                                                                                                                                                                                                                                                                           |                                                                                                                                                                                                                                                                                                                                                                                                                                                                                                                                                                                                                                                 | -                               | C_umhiu_00329_mRNA_28.1   | -                         |
| GF003614 | 0                               | 1                         | 1                         | 0 Hypothetical protein (1)                                             | nucleic acid binding [GO:0003676 molecular_function] (1)                                                                                                                                                                                                                                                                                                                                                                                                                                                  | Ribonuclease H-like domain [IPRO12337] (1)                                                                                                                                                                                                                                                                                                                                                                                                                                                                                                                                                                                                      | -                               | C_umhiu_00329_mRNA_21.1   | -                         |
| GF003613 | 0                               | 1                         | 1                         | 0 Hypothetical protein (1)                                             |                                                                                                                                                                                                                                                                                                                                                                                                                                                                                                           |                                                                                                                                                                                                                                                                                                                                                                                                                                                                                                                                                                                                                                                 | -                               | C_umhiu_00329_mRNA_18.1   | -                         |
| GF003612 | 0                               | 1                         | 1                         | 0 Hypothetical protein (1)                                             |                                                                                                                                                                                                                                                                                                                                                                                                                                                                                                           |                                                                                                                                                                                                                                                                                                                                                                                                                                                                                                                                                                                                                                                 | -                               | C_umhiu_00329_mRNA_13.1   | -                         |
| GF003611 | 0                               | 1                         | 1                         | 0 Hypothetical protein (1)                                             |                                                                                                                                                                                                                                                                                                                                                                                                                                                                                                           |                                                                                                                                                                                                                                                                                                                                                                                                                                                                                                                                                                                                                                                 | -                               | C_umhiu_00329_mRNA_12.1   | -                         |
| GF003610 | 0                               | 1                         | 1                         | 0 Hypothetical protein (1)                                             |                                                                                                                                                                                                                                                                                                                                                                                                                                                                                                           |                                                                                                                                                                                                                                                                                                                                                                                                                                                                                                                                                                                                                                                 | -                               | C_umhiu_00329_mRNA_11.1   | -                         |
| GF003609 | 0                               | 1                         | 1                         | 0 LRR receptor-like kinase family protein (1)                          | ATP binding [GO:0005524 molecular_function] (1); protein phosphorylation [GO:0006468 biological_process] (1); protein kinase activity [GO:0004672 molecular_function] (1)                                                                                                                                                                                                                                                                                                                                 | Serine/threonine-protein kinase, active site [IPRO08271] (1); Leucine-rich repeat-containing N-terminal, plant-type [IPRO13210] (1); Serine/threonine dual specificity protein kinase, catalytic domain [IPRO02290] (1); Protein kinase domain [IPRO00719] (1); Leucine-rich repeat domain, L domain-like [IPRO26755] (1); Protein kinase-like domain [IPRO11009] (1)                                                                                                                                                                                                                                                                           | -                               | C_umhiu_00329_mRNA_10.1   | -                         |
| GF003608 | 0                               | 1                         | 1                         | 0 Hypothetical protein (1)                                             |                                                                                                                                                                                                                                                                                                                                                                                                                                                                                                           |                                                                                                                                                                                                                                                                                                                                                                                                                                                                                                                                                                                                                                                 | -                               | C_umhiu_00329_mRNA_1.1    | -                         |
| GF003607 | 0                               | 1                         | 1                         | 0 Hypothetical protein (1)                                             |                                                                                                                                                                                                                                                                                                                                                                                                                                                                                                           |                                                                                                                                                                                                                                                                                                                                                                                                                                                                                                                                                                                                                                                 | -                               | C_umhiu_00329_mRNA_14.1   | -                         |
| GF003606 | 0                               | 1                         | 1                         | 0 Laccase (1)                                                          | oxidation-reduction process [GO:0055114 biological_process] (1); oxidoreductase activity [GO:0016491 molecular_function] (1); copper ion binding [GO:0005507 molecular_function] (1)                                                                                                                                                                                                                                                                                                                      | Multicopper oxidase, type 2 [IPRO11706] (1); Multicopper oxidase, type 1 [IPRO01171] (1); Cupredoxin [IPRO08972] (4)                                                                                                                                                                                                                                                                                                                                                                                                                                                                                                                            | -                               | C_umhiu_00328_mRNA_1.1    | -                         |
| GF003605 | 0                               | 1                         | 1                         | 0 Hypothetical protein (1)                                             |                                                                                                                                                                                                                                                                                                                                                                                                                                                                                                           |                                                                                                                                                                                                                                                                                                                                                                                                                                                                                                                                                                                                                                                 | -                               | C_umhiu_00327_mRNA_8.1    | -                         |
| GF003604 | 0                               | 1                         | 1                         | 0 Tetrapeptide repeat (TPR)-containing protein (1)                     | protein binding [GO:0005515 molecular_function] (1)                                                                                                                                                                                                                                                                                                                                                                                                                                                       | Protein of unknown function DUF3493 [IPRO21883] (1); Tetrapeptide-like helical domain [IPRO11990] (4)                                                                                                                                                                                                                                                                                                                                                                                                                                                                                                                                           | -                               | C_umhiu_00326_mRNA_9.1    | -                         |
| GF003603 | 0                               | 1                         | 1                         | 0 Hypothetical protein (1)                                             |                                                                                                                                                                                                                                                                                                                                                                                                                                                                                                           |                                                                                                                                                                                                                                                                                                                                                                                                                                                                                                                                                                                                                                                 | -                               | C_umhiu_00326_mRNA_7.1    | -                         |
| GF003602 | 0                               | 1                         | 1                         | 0 Hypothetical protein (1)                                             | carbohydrate metabolic process [GO:0005979 biological_process] (1); hydrolase activity, hydrolyzing O-glycosyl compounds [GO:0004553 molecular_function] (1)                                                                                                                                                                                                                                                                                                                                              | Glycoside hydrolase, catalytic domain [IPRO13781] (1); Glycoside hydrolase superfamily [IPRO17853] (1); Glycosyl hydrolase family 1, N-terminal conserved site [IPRO31312] (1); Glycoside hydrolase family 1 [IPRO01360] (1)                                                                                                                                                                                                                                                                                                                                                                                                                    | -                               | C_umhiu_00326_mRNA_29.1   | -                         |
| GF003601 | 0                               | 1                         | 1                         | 0 Dephospho-CoA kinase family isoform 1 (1)                            | coenzyme A biosynthetic process [GO:001637 biological_process] (1); ATP binding [GO:0005524 molecular_function] (1); dephospho-CoA kinase activity [GO:0004140 molecular_function] (1)                                                                                                                                                                                                                                                                                                                    | P-loop containing nucleoside triphosphate hydrolase [IPRO27417] (4); Dephospho-CoA kinase [IPRO01977] (1)                                                                                                                                                                                                                                                                                                                                                                                                                                                                                                                                       | -                               | C_umhiu_00326_mRNA_2.1    | -                         |
| GF003600 | 0                               | 1                         | 1                         | 0 Mismatch repair endonuclease PMS2 (1)                                | mismatch repair [GO:0006298 biological_process] (1); mismatched DNA binding [GO:0003963 molecular_function] (1); thiamine metabolic process [GO:0006772 biological_process] (1); ATP binding [GO:0005524 molecular_function] (1); mismatch repair complex [GO:0023000 cellular_component] (1); thiamine diphosphokinase activity [GO:0004788 molecular_function] (1); thiamine binding [GO:0003975 molecular_function] (1); thiamine diphosphate biosynthetic process [GO:0009229 biological_process] (1) | DNA mismatch repair protein Pms1/Pms2 [IPRO28831] (1); MutL, C-terminal, dimerization [IPRO14700] (1); Thiamin pyrophosphokinase, catalytic domain [IPRO03711] (1); DNA mismatch repair, conserved site [IPRO14762] (1); DNA mismatch repair protein, C-terminal [IPRO13071] (1); Ribosomal protein S5 domain 2-type f04 [IPRO29568] (1); Thiamin pyrophosphokinase [IPRO06282] (1); DNA mismatch repair protein family [IPRO02099] (1); Thiamin pyrophosphokinase, thiamin-B1-binding domain [IPRO07373] (1); Helicase kinase-like ATPase, C-terminal domain [IPRO05594] (1); Ribosomal protein S5 domain 2-type f04, subgroup [IPRO14721] (4) | -                               | C_umhiu_00326_mRNA_19.1   | -                         |
| GF003699 | 0                               | 1                         | 1                         | 0 Hypothetical protein (1)                                             |                                                                                                                                                                                                                                                                                                                                                                                                                                                                                                           |                                                                                                                                                                                                                                                                                                                                                                                                                                                                                                                                                                                                                                                 | -                               | C_umhiu_00326_mRNA_17.1   | -                         |
| GF003698 | 0                               | 1                         | 1                         | 0 Hypothetical protein (1)                                             |                                                                                                                                                                                                                                                                                                                                                                                                                                                                                                           |                                                                                                                                                                                                                                                                                                                                                                                                                                                                                                                                                                                                                                                 | -                               | C_umhiu_00326_mRNA_1.1    | -                         |
| GF003697 | 0                               | 1                         | 1                         | 0 Hypothetical protein (1)                                             |                                                                                                                                                                                                                                                                                                                                                                                                                                                                                                           |                                                                                                                                                                                                                                                                                                                                                                                                                                                                                                                                                                                                                                                 | -                               | C_umhiu_00325_mRNA_3.1    | -                         |
| GF003696 | 0                               | 1                         | 1                         | 0 Hypothetical protein (1)                                             |                                                                                                                                                                                                                                                                                                                                                                                                                                                                                                           | GAG-pro-integrase domain [IPRO25724] (1)                                                                                                                                                                                                                                                                                                                                                                                                                                                                                                                                                                                                        | -                               | C_umhiu_00325_mRNA_22.1   | -                         |
| GF003695 | 0                               | 1                         | 1                         | 0 Hypothetical protein (1)                                             |                                                                                                                                                                                                                                                                                                                                                                                                                                                                                                           |                                                                                                                                                                                                                                                                                                                                                                                                                                                                                                                                                                                                                                                 | -                               | C_umhiu_00325_mRNA_2.1    | -                         |
| GF003694 | 0                               | 1                         | 1                         | 0 Hypothetical protein (1)                                             |                                                                                                                                                                                                                                                                                                                                                                                                                                                                                                           |                                                                                                                                                                                                                                                                                                                                                                                                                                                                                                                                                                                                                                                 | -                               | C_umhiu_00325_mRNA_19.1   | -                         |
| GF003693 | 0                               | 1                         | 1                         | 0 Hypothetical protein (1)                                             | DNA replication [GO:0006260 biological_process] (1); ATP binding [GO:0005524 molecular_function] (1); DNA binding [GO:0000677 molecular_function] (1)                                                                                                                                                                                                                                                                                                                                                     | MCM domain [IPRO01208] (4)                                                                                                                                                                                                                                                                                                                                                                                                                                                                                                                                                                                                                      | -                               | C_umhiu_00325_mRNA_18.1   | -                         |
| GF003692 | 0                               | 1                         | 1                         | 0 Hypothetical protein (1)                                             | nucleic acid binding [GO:0003676 molecular_function] (1)                                                                                                                                                                                                                                                                                                                                                                                                                                                  | Ribonuclease H-like domain [IPRO12337] (1)                                                                                                                                                                                                                                                                                                                                                                                                                                                                                                                                                                                                      | -                               | C_umhiu_00325_mRNA_17.1   | -                         |
| GF003691 | 0                               | 1                         | 1                         | 0 Hypothetical protein (1)                                             |                                                                                                                                                                                                                                                                                                                                                                                                                                                                                                           |                                                                                                                                                                                                                                                                                                                                                                                                                                                                                                                                                                                                                                                 | -                               | C_umhiu_00325_mRNA_14.1   | -                         |

| ID       | Num. in C. crotteniae | Num. in C. auris | Num. in P. putidus | Note                                                         | GO                                                                                                                                                                                                                                 | InterPro                                                                                                                                                                                                                                                                                                                                                                                              | Members in C. crotteniae                                                                                                                                                                                          | Members in C. auris | Members in P. putidus |   |
|----------|-----------------------|------------------|--------------------|--------------------------------------------------------------|------------------------------------------------------------------------------------------------------------------------------------------------------------------------------------------------------------------------------------|-------------------------------------------------------------------------------------------------------------------------------------------------------------------------------------------------------------------------------------------------------------------------------------------------------------------------------------------------------------------------------------------------------|-------------------------------------------------------------------------------------------------------------------------------------------------------------------------------------------------------------------|---------------------|-----------------------|---|
| GF003690 | 0                     | 1                | 0                  | Retroransposon gag protein (1)                               |                                                                                                                                                                                                                                    | Eukaryotic transposon insertion factor 3 subunit G, N-terminal [IPR026675] (1)                                                                                                                                                                                                                                                                                                                        |                                                                                                                                                                                                                   | C_uni0024_mRNA_9.1  | -                     |   |
| GF003689 | 0                     | 1                | 0                  | Hypothetical protein (1)                                     |                                                                                                                                                                                                                                    |                                                                                                                                                                                                                                                                                                                                                                                                       |                                                                                                                                                                                                                   | C_uni0024_mRNA_7.1  | -                     |   |
| GF003688 | 0                     | 1                | 0                  | Hypothetical protein (1)                                     |                                                                                                                                                                                                                                    |                                                                                                                                                                                                                                                                                                                                                                                                       |                                                                                                                                                                                                                   | C_uni0024_mRNA_5.1  | -                     |   |
| GF003687 | 0                     | 1                | 0                  | Hypothetical protein (1)                                     | carbohydrate metabolic process [GO:0005979 biological_process] (1); polygalacturonase activity [GO:0004450 molecular_function] (1)                                                                                                 | Glycoside hydrolase, family 28 [IPR00741] (1); Pectin lyase fold [IPR012334] (1); Pectin lyase fold/virulence factor [IPR011050] (1)                                                                                                                                                                                                                                                                  |                                                                                                                                                                                                                   | C_uni0024_mRNA_3.1  | -                     |   |
| GF003686 | 0                     | 1                | 0                  | Hypothetical protein (1)                                     |                                                                                                                                                                                                                                    |                                                                                                                                                                                                                                                                                                                                                                                                       |                                                                                                                                                                                                                   | C_uni0024_mRNA_24.1 | -                     |   |
| GF003685 | 0                     | 1                | 0                  | Hypothetical protein (1)                                     |                                                                                                                                                                                                                                    | Pectin lyase fold/virulence factor [IPR011050] (1); Pectin lyase fold [IPR012334] (1)                                                                                                                                                                                                                                                                                                                 |                                                                                                                                                                                                                   | C_uni0024_mRNA_2.1  | -                     |   |
| GF003684 | 0                     | 1                | 0                  | Hypothetical protein (1)                                     |                                                                                                                                                                                                                                    |                                                                                                                                                                                                                                                                                                                                                                                                       |                                                                                                                                                                                                                   | C_uni0024_mRNA_12.1 | -                     |   |
| GF003683 | 0                     | 1                | 0                  | Hypothetical protein (1)                                     |                                                                                                                                                                                                                                    |                                                                                                                                                                                                                                                                                                                                                                                                       |                                                                                                                                                                                                                   | C_uni0024_mRNA_1.1  | -                     |   |
| GF003682 | 0                     | 1                | 0                  | Hypothetical protein (1)                                     | nucleic acid binding [GO:0003676 molecular_function] (1); protein dimerization activity [GO:0046983 molecular_function] (1)                                                                                                        | HAT, C-terminal dimerization domain [IPR008961] (1); Ribonuclease H-like domain [IPR012537] (1)                                                                                                                                                                                                                                                                                                       |                                                                                                                                                                                                                   | C_uni0023_mRNA_9.1  | -                     |   |
| GF003681 | 0                     | 1                | 0                  | Hypothetical protein (1)                                     |                                                                                                                                                                                                                                    |                                                                                                                                                                                                                                                                                                                                                                                                       |                                                                                                                                                                                                                   | C_uni0023_mRNA_8.1  | -                     |   |
| GF003680 | 0                     | 1                | 0                  | Cytoskin ribosome 5'-monophosphate phosphoribohydrolase (1)  |                                                                                                                                                                                                                                    | Cytoskin ribosome 5'-monophosphate phosphoribohydrolase LOC [IPR005269] (1); LOC family [IPR031100] (1)                                                                                                                                                                                                                                                                                               |                                                                                                                                                                                                                   | C_uni0023_mRNA_24.1 | -                     |   |
| GF003679 | 0                     | 1                | 0                  | Hypothetical protein (1)                                     |                                                                                                                                                                                                                                    |                                                                                                                                                                                                                                                                                                                                                                                                       |                                                                                                                                                                                                                   | C_uni0023_mRNA_16.1 | -                     |   |
| GF003678 | 0                     | 1                | 0                  | Hypothetical protein (1)                                     |                                                                                                                                                                                                                                    |                                                                                                                                                                                                                                                                                                                                                                                                       |                                                                                                                                                                                                                   | C_uni0023_mRNA_15.1 | -                     |   |
| GF003677 | 0                     | 1                | 0                  | Hypothetical protein (1)                                     |                                                                                                                                                                                                                                    |                                                                                                                                                                                                                                                                                                                                                                                                       |                                                                                                                                                                                                                   | C_uni0023_mRNA_14.1 | -                     |   |
| GF003676 | 0                     | 1                | 0                  | Hypothetical protein (1)                                     | Polymerase II transcription, Ribonuclease H fold (1)                                                                                                                                                                               | Reverse transcriptase zinc-binding domain [IPR026960] (1)                                                                                                                                                                                                                                                                                                                                             |                                                                                                                                                                                                                   | C_uni0023_mRNA_13.1 | -                     |   |
| GF003675 | 0                     | 1                | 0                  | Hypothetical protein (1)                                     |                                                                                                                                                                                                                                    |                                                                                                                                                                                                                                                                                                                                                                                                       |                                                                                                                                                                                                                   | C_uni0023_mRNA_10.1 | -                     |   |
| GF003674 | 0                     | 1                | 0                  | Hypothetical protein (1)                                     |                                                                                                                                                                                                                                    |                                                                                                                                                                                                                                                                                                                                                                                                       |                                                                                                                                                                                                                   | C_uni0022_mRNA_42.1 | -                     |   |
| GF003673 | 0                     | 1                | 0                  | Hypothetical protein (1)                                     | DNA binding [GO:0003677 molecular_function] (1); regulation of transcription, DNA-segment [GO:0003555 biological_process] (1)                                                                                                      | NAC domain [IPR003441] (1)                                                                                                                                                                                                                                                                                                                                                                            |                                                                                                                                                                                                                   | C_uni0022_mRNA_38.1 | -                     |   |
| GF003672 | 0                     | 1                | 0                  | 60S ribosomal protein L13a (1)                               | ribosome [GO:0005840 cellular_component] (1); structural constituent of ribosome [GO:0003735 molecular_function] (1); large ribosomal subunit [GO:0013934 cellular_component] (1); translation [GO:0006412 biological_process] (1) | Ribosomal protein L13, eukaryotic/archaeal [IPR005755] (1); Ribosomal protein L13 domain [IPR023563] (1); Ribosomal protein L13, conserved site [IPR023563] (1); Ribosomal protein L13 [IPR005823] (1)                                                                                                                                                                                                |                                                                                                                                                                                                                   | C_uni0022_mRNA_32.1 | -                     |   |
| GF003671 | 0                     | 1                | 0                  | Pentatricopeptide repeat-containing protein, chloroplast (1) | protein binding [GO:0005515 molecular_function] (1)                                                                                                                                                                                | Pentatricopeptide repeat [IPR028851] (1); Tetranucleotide-like helical domain [IPR011990] (1)                                                                                                                                                                                                                                                                                                         |                                                                                                                                                                                                                   | C_uni0022_mRNA_26.1 | -                     |   |
| GF003670 | 0                     | 1                | 0                  | Hypothetical protein (1)                                     | DNA replication initiation [GO:0006270 biological_process] (1)                                                                                                                                                                     | CDC-45 family [IPR003874] (1)                                                                                                                                                                                                                                                                                                                                                                         |                                                                                                                                                                                                                   | C_uni0022_mRNA_13.1 | -                     |   |
| GF003669 | 0                     | 1                | 0                  | Hypothetical protein (1)                                     |                                                                                                                                                                                                                                    |                                                                                                                                                                                                                                                                                                                                                                                                       |                                                                                                                                                                                                                   | C_uni0022_mRNA_10.1 | -                     |   |
| GF003668 | 0                     | 1                | 0                  | Hypothetical protein (1)                                     | zinc ion binding [GO:0008270 molecular_function] (1)                                                                                                                                                                               | MLL transposase domain [IPR010509] (1); Zinc finger, DMZ-type [IPR006564] (1); Zinc finger, SWIM-type [IPR007527] (1)                                                                                                                                                                                                                                                                                 |                                                                                                                                                                                                                   | C_uni0021_mRNA_6.1  | -                     |   |
| GF003667 | 0                     | 1                | 0                  | Hypothetical protein (1)                                     | cysteine-type peptidase activity [GO:0008234 molecular_function] (1); proteolysis [GO:0006508 biological_process] (1)                                                                                                              | Ulp1 protease family, C-terminal catalytic domain [IPR030453] (1)                                                                                                                                                                                                                                                                                                                                     |                                                                                                                                                                                                                   | C_uni0021_mRNA_5.1  | -                     |   |
| GF003666 | 0                     | 1                | 0                  | Aspartic proteinase-like protein 2 (1)                       | aspartic-type endopeptidase activity [GO:0004190 molecular_function] (1); binding [GO:0005488 molecular_function] (1); RNA binding [GO:0003723 molecular_function] (1); proteolysis [GO:0006508 biological_process] (1)            | Peptidase family A1 domain [IPR033121] (1); Armadillo-type fold [IPR016024] (1); Pumilio homology domain [IPR033133] (1); Aspartic peptidase domain [IPR021109] (1); Pumilio RNA-binding repeat [IPR001313] (1); Aspartic peptidase A1 family [IPR001461] (1); Xylanase inhibitor, N-terminal [IPR032061] (1); Xylanase inhibitor, C-terminal [IPR027991] (1); Armadillo-like helical [IPR011989] (1) |                                                                                                                                                                                                                   | C_uni0021_mRNA_20.1 | -                     |   |
| GF003665 | 0                     | 1                | 0                  | Hypothetical protein (1)                                     |                                                                                                                                                                                                                                    |                                                                                                                                                                                                                                                                                                                                                                                                       |                                                                                                                                                                                                                   | C_uni0021_mRNA_13.1 | -                     |   |
| GF003664 | 0                     | 1                | 0                  | Hypothetical protein (1)                                     |                                                                                                                                                                                                                                    |                                                                                                                                                                                                                                                                                                                                                                                                       |                                                                                                                                                                                                                   | C_uni0020_mRNA_3.1  | -                     |   |
| GF003663 | 0                     | 1                | 0                  | Hypothetical protein (1)                                     | metabolic process [GO:0008152 biological_process] (1); transferase activity, transferring hexoyl groups [GO:0016758 molecular_function] (1)                                                                                        | UDP-glucuronoyl/UDP-glucosyltransferase [IPR002213] (1)                                                                                                                                                                                                                                                                                                                                               |                                                                                                                                                                                                                   | C_uni0020_mRNA_23.1 | -                     |   |
| GF003662 | 0                     | 1                | 0                  | Hypothetical protein (1)                                     |                                                                                                                                                                                                                                    |                                                                                                                                                                                                                                                                                                                                                                                                       |                                                                                                                                                                                                                   | C_uni0020_mRNA_21.1 | -                     |   |
| GF003661 | 0                     | 1                | 0                  | Hypothetical protein (1)                                     |                                                                                                                                                                                                                                    |                                                                                                                                                                                                                                                                                                                                                                                                       |                                                                                                                                                                                                                   | C_uni0020_mRNA_14.1 | -                     |   |
| GF003660 | 0                     | 1                | 0                  | Hypothetical protein (1)                                     |                                                                                                                                                                                                                                    |                                                                                                                                                                                                                                                                                                                                                                                                       |                                                                                                                                                                                                                   | C_uni0020_mRNA_10.1 | -                     |   |
| GF003659 | 0                     | 1                | 0                  | Hypothetical protein (1)                                     |                                                                                                                                                                                                                                    |                                                                                                                                                                                                                                                                                                                                                                                                       |                                                                                                                                                                                                                   | C_uni0019_mRNA_2.1  | -                     |   |
| GF003658 | 0                     | 1                | 0                  | Hypothetical protein (1)                                     | basic-like protein (1)                                                                                                                                                                                                             | Cupredoxin [IPR008972] (1); Phycocyanin domain [IPR003245] (1)                                                                                                                                                                                                                                                                                                                                        |                                                                                                                                                                                                                   | C_uni0019_mRNA_29.1 | -                     |   |
| GF003657 | 0                     | 1                | 0                  | Hypothetical protein (1)                                     |                                                                                                                                                                                                                                    |                                                                                                                                                                                                                                                                                                                                                                                                       |                                                                                                                                                                                                                   | C_uni0019_mRNA_21.1 | -                     |   |
| GF003656 | 0                     | 1                | 0                  | Hypothetical protein (1)                                     |                                                                                                                                                                                                                                    |                                                                                                                                                                                                                                                                                                                                                                                                       |                                                                                                                                                                                                                   | C_uni0019_mRNA_19.1 | -                     |   |
| GF003655 | 0                     | 1                | 0                  | Hypothetical protein (1)                                     | putative pentatricopeptide repeat domain containing protein (1)                                                                                                                                                                    | Tetranucleotide-like helical domain [IPR011990] (1); Pentatricopeptide repeat [IPR028851] (1)                                                                                                                                                                                                                                                                                                         |                                                                                                                                                                                                                   | C_uni0019_mRNA_15.1 | -                     |   |
| GF003654 | 0                     | 1                | 0                  | Hypothetical protein (1)                                     |                                                                                                                                                                                                                                    |                                                                                                                                                                                                                                                                                                                                                                                                       |                                                                                                                                                                                                                   | C_uni0019_mRNA_14.1 | -                     |   |
| GF003653 | 0                     | 1                | 0                  | Hypothetical protein (1)                                     | protein binding [GO:0005515 molecular_function] (1)                                                                                                                                                                                | Pentatricopeptide repeat [IPR028851] (1); Tetranucleotide-like helical domain [IPR011990] (1)                                                                                                                                                                                                                                                                                                         |                                                                                                                                                                                                                   | C_uni0019_mRNA_12.1 | -                     |   |
| GF003652 | 0                     | 1                | 0                  | Hypothetical protein (1)                                     | Lysine histidine transporter 1 (1)                                                                                                                                                                                                 | Amino acid transporter, transmembrane domain [IPR034771] (1); Tryptophan/tyrosine permease [IPR018227] (1)                                                                                                                                                                                                                                                                                            |                                                                                                                                                                                                                   | C_uni0018_mRNA_2.1  | -                     |   |
| GF003651 | 0                     | 1                | 0                  | Hypothetical protein (1)                                     | Nucleic acid binding, OB-fold-like protein isoform 2 (1)                                                                                                                                                                           | SI domain [IPR003029] (1); Nucleic acid-binding, OB-fold [IPR012340] (1)                                                                                                                                                                                                                                                                                                                              |                                                                                                                                                                                                                   | C_uni0018_mRNA_1.1  | -                     |   |
| GF003650 | 0                     | 1                | 0                  | Hypothetical protein (1)                                     | Disease resistance protein (CC-NBS-LRR class) family protein (1)                                                                                                                                                                   | Leucine-rich repeat domain, I, domain-like [IPR005751] (1); P-loop containing nucleoside triphosphate hydrolase [IPR027417] (1); NB-ARC [IPR002182] (1)                                                                                                                                                                                                                                               |                                                                                                                                                                                                                   | C_uni0017_mRNA_7.1  | -                     |   |
| GF003649 | 0                     | 1                | 0                  | Hypothetical protein (1)                                     |                                                                                                                                                                                                                                    |                                                                                                                                                                                                                                                                                                                                                                                                       |                                                                                                                                                                                                                   | C_uni0017_mRNA_27.1 | -                     |   |
| GF003648 | 0                     | 1                | 0                  | Hypothetical protein (1)                                     | methyltransferase activity [GO:0008168 molecular_function] (1); metabolic process [GO:0008152 biological_process] (1)                                                                                                              | S-adenosyl-L-methionine-dependent methyltransferase [IPR029603] (1); Methyltransferase type 11 [IPR013216] (1)                                                                                                                                                                                                                                                                                        |                                                                                                                                                                                                                   | C_uni0017_mRNA_21.1 | -                     |   |
| GF003647 | 0                     | 1                | 0                  | Hypothetical protein (1)                                     |                                                                                                                                                                                                                                    |                                                                                                                                                                                                                                                                                                                                                                                                       |                                                                                                                                                                                                                   | C_uni0017_mRNA_2.1  | -                     |   |
| GF003646 | 0                     | 1                | 0                  | Hypothetical protein (1)                                     |                                                                                                                                                                                                                                    |                                                                                                                                                                                                                                                                                                                                                                                                       |                                                                                                                                                                                                                   | C_uni0017_mRNA_19.1 | -                     |   |
| GF003645 | 0                     | 1                | 0                  | Hypothetical protein (1)                                     |                                                                                                                                                                                                                                    |                                                                                                                                                                                                                                                                                                                                                                                                       |                                                                                                                                                                                                                   | C_uni0017_mRNA_18.1 | -                     |   |
| GF003644 | 0                     | 1                | 0                  | Hypothetical protein (1)                                     |                                                                                                                                                                                                                                    |                                                                                                                                                                                                                                                                                                                                                                                                       |                                                                                                                                                                                                                   | C_uni0017_mRNA_16.1 | -                     |   |
| GF003643 | 0                     | 1                | 0                  | Hypothetical protein (1)                                     |                                                                                                                                                                                                                                    | Transposase-associated domain [IPR028400] (1)                                                                                                                                                                                                                                                                                                                                                         |                                                                                                                                                                                                                   | C_uni0017_mRNA_15.1 | -                     |   |
| GF003642 | 0                     | 1                | 0                  | Hypothetical protein (1)                                     |                                                                                                                                                                                                                                    |                                                                                                                                                                                                                                                                                                                                                                                                       |                                                                                                                                                                                                                   | C_uni0017_mRNA_14.1 | -                     |   |
| GF003641 | 0                     | 1                | 0                  | Hypothetical protein (1)                                     |                                                                                                                                                                                                                                    |                                                                                                                                                                                                                                                                                                                                                                                                       |                                                                                                                                                                                                                   | C_uni0017_mRNA_13.1 | -                     |   |
| GF003640 | 0                     | 1                | 0                  | Hypothetical protein (1)                                     |                                                                                                                                                                                                                                    | Domain of unknown function DUF1336 [IPR009769] (1)                                                                                                                                                                                                                                                                                                                                                    |                                                                                                                                                                                                                   | C_uni0017_mRNA_12.1 | -                     |   |
| GF003639 | 0                     | 1                | 0                  | Hypothetical protein (1)                                     |                                                                                                                                                                                                                                    |                                                                                                                                                                                                                                                                                                                                                                                                       |                                                                                                                                                                                                                   | C_uni0017_mRNA_11.1 | -                     |   |
| GF003638 | 0                     | 1                | 0                  | Hypothetical protein (1)                                     | Disease resistance protein RPS2, putative (1)                                                                                                                                                                                      | Leucine-rich repeat domain, I, domain-like [IPR005751] (1)                                                                                                                                                                                                                                                                                                                                            |                                                                                                                                                                                                                   | C_uni0017_mRNA_10.1 | -                     |   |
| GF003637 | 0                     | 1                | 0                  | Hypothetical protein (1)                                     |                                                                                                                                                                                                                                    |                                                                                                                                                                                                                                                                                                                                                                                                       |                                                                                                                                                                                                                   | C_uni0016_mRNA_8.1  | -                     |   |
| GF003636 | 0                     | 1                | 0                  | Hypothetical protein (1)                                     |                                                                                                                                                                                                                                    |                                                                                                                                                                                                                                                                                                                                                                                                       |                                                                                                                                                                                                                   | C_uni0016_mRNA_7.1  | -                     |   |
| GF003635 | 0                     | 1                | 0                  | Hypothetical protein (1)                                     | nucleic acid binding [GO:0003676 molecular_function] (1)                                                                                                                                                                           | Ribonuclease H-like domain [IPR012337] (1)                                                                                                                                                                                                                                                                                                                                                            |                                                                                                                                                                                                                   | C_uni0016_mRNA_3.1  | -                     |   |
| GF003634 | 0                     | 1                | 0                  | Hypothetical protein (1)                                     |                                                                                                                                                                                                                                    |                                                                                                                                                                                                                                                                                                                                                                                                       |                                                                                                                                                                                                                   | C_uni0016_mRNA_23.1 | -                     |   |
| GF003633 | 0                     | 1                | 0                  | Hypothetical protein (1)                                     | DNA binding [GO:0003677 molecular_function] (1)                                                                                                                                                                                    | B3 DNA binding domain [IPR003340] (1); DNA-binding pseudoreceptor domain [IPR015300] (1)                                                                                                                                                                                                                                                                                                              |                                                                                                                                                                                                                   | C_uni0016_mRNA_22.1 | -                     |   |
| GF003632 | 0                     | 1                | 0                  | Hypothetical protein (1)                                     | 2-oxoglutarate (2OG) and Fe(II)-dependent oxygenase superfamily protein (1)                                                                                                                                                        | oxidation-reduction process [GO:005511 biological_process] (1); oxidoreductase activity [GO:0016049 molecular_function] (1); iron ion binding [GO:0005506 molecular_function] (1)                                                                                                                                                                                                                     | Non-haem dioxygenase N-terminal domain [IPR020992] (1); Isopenicillin N synthase-like [IPR027443] (1); Isopenicillin N synthase [IPR002283] (1); Oxoprolactin/iron-dependent dioxygenase [IPR005123] (1)          |                     | C_uni0016_mRNA_21.1   | - |
| GF003631 | 0                     | 1                | 0                  | Hypothetical protein (1)                                     | nucleic acid binding [GO:0003676 molecular_function] (1)                                                                                                                                                                           | Ribonuclease H-like domain [IPR012337] (1); Endonuclease/exonuclease/phosphatase [IPR005153] (1)                                                                                                                                                                                                                                                                                                      |                                                                                                                                                                                                                   | C_uni0016_mRNA_2.1  | -                     |   |
| GF003630 | 0                     | 1                | 0                  | Hypothetical protein (1)                                     |                                                                                                                                                                                                                                    | Gas-polymerase of LTR copia-type [IPR029472] (1)                                                                                                                                                                                                                                                                                                                                                      |                                                                                                                                                                                                                   | C_uni0016_mRNA_19.1 | -                     |   |
| GF003629 | 0                     | 1                | 0                  | Hypothetical protein (1)                                     | NADPH-dependent codonase reductase-like protein (1)                                                                                                                                                                                | oxidation-reduction process [GO:005511 biological_process] (1); oxidoreductase activity [GO:0016049 molecular_function] (1)                                                                                                                                                                                                                                                                           | NADP-dependent oxidoreductase domain [IPR023210] (1); Aldo-keto reductase conserved site [IPR018170] (1); Aldo-keto reductase [IPR020471] (1); Aldo-keto reductase/potassium channel subunit beta [IPR001395] (1) |                     | C_uni0016_mRNA_17.1   | - |
| GF003628 | 0                     | 1                | 0                  | Hypothetical protein (1)                                     |                                                                                                                                                                                                                                    |                                                                                                                                                                                                                                                                                                                                                                                                       |                                                                                                                                                                                                                   | C_uni0016_mRNA_16.1 | -                     |   |
| GF003627 | 0                     | 1                | 0                  | Hypothetical protein (1)                                     | catalytic activity [GO:0003824 molecular_function] (1); intramolecular transferase activity [GO:0016066 molecular_function] (1)                                                                                                    | Terpenoid cyclase/protein prenyltransferase alpha-alpha toroid [IPR008930] (1); PPTB repeat [IPR013301] (1); Squalene cyclase [IPR018333] (1); Squalene cyclase, N-terminal [IPR020973] (1)                                                                                                                                                                                                           |                                                                                                                                                                                                                   | C_uni0016_mRNA_14.1 | -                     |   |
| GF003626 | 0                     | 1                | 0                  | Hypothetical protein (1)                                     | P-loop nucleoside triphosphate hydrolase superfamily protein (1)                                                                                                                                                                   | P-loop containing nucleoside triphosphate hydrolase [IPR027417] (1)                                                                                                                                                                                                                                                                                                                                   |                                                                                                                                                                                                                   | C_uni0016_mRNA_12.1 | -                     |   |
| GF003625 | 0                     | 1                | 0                  | Hypothetical protein (1)                                     | protein kinase activity [GO:0004672 molecular_function] (1); protein phosphorylation [GO:0006068 biological_process] (1); ATP binding [GO:0005524 molecular_function] (1)                                                          | Protein kinase domain [IPR000719] (1); Consensus A-like actin/glycine domain [IPR013320] (1); Protein kinase-like domain [IPR009109] (1); Protein kinase, ATP binding site [IPR017441] (1); Serine-threonine/tyrosine-protein kinase catalytic domain [IPR012451] (1)                                                                                                                                 |                                                                                                                                                                                                                   | C_uni0015_mRNA_31.1 | -                     |   |
| GF003624 | 0                     | 1                | 0                  | Hypothetical protein (1)                                     | transferase activity, transferring acyl groups other than amino-acyl groups [GO:0016147 molecular_function] (1)                                                                                                                    | Chloramphenicol acetyltransferase-like domain [IPR023131] (1); Transferase [IPR000140] (1)                                                                                                                                                                                                                                                                                                            |                                                                                                                                                                                                                   | C_uni0015_mRNA_29.1 | -                     |   |
| GF003623 | 0                     | 1                | 0                  | Hypothetical protein (1)                                     | Hydroxycinnamoyl-Coenzyme A shikimate/quininate hydroxycinnamoyltransferase (1)                                                                                                                                                    | transferase activity, transferring acyl groups other than amino-acyl groups [GO:0016147 molecular_function] (1)                                                                                                                                                                                                                                                                                       |                                                                                                                                                                                                                   | C_uni0015_mRNA_28.1 | -                     |   |
| GF003622 | 0                     | 1                | 0                  | Hypothetical protein (1)                                     |                                                                                                                                                                                                                                    |                                                                                                                                                                                                                                                                                                                                                                                                       |                                                                                                                                                                                                                   | C_uni0015_mRNA_22.1 | -                     |   |
| GF003621 | 0                     | 1                | 0                  | Hypothetical protein (1)                                     |                                                                                                                                                                                                                                    |                                                                                                                                                                                                                                                                                                                                                                                                       |                                                                                                                                                                                                                   | C_uni0015_mRNA_10.1 | -                     |   |
| GF003620 | 0                     | 1                | 0                  | Hypothetical protein (1)                                     |                                                                                                                                                                                                                                    |                                                                                                                                                                                                                                                                                                                                                                                                       |                                                                                                                                                                                                                   | C_uni0015_mRNA_1.1  | -                     |   |

| ID        | Num. in <i>C. crotchiense</i> | Num. in <i>C. caudis</i> | Num. in <i>P. putida</i> | Note                                                             | GO                                                                                                                                                                                                                                                                                                                                                                                                                                                         | InterPro                                                                                                                                                                                                                                                                                                                                                                                                                                             | Members in <i>C. crotchiense</i> | Members in <i>C. caudis</i> | Members in <i>P. putida</i> |
|-----------|-------------------------------|--------------------------|--------------------------|------------------------------------------------------------------|------------------------------------------------------------------------------------------------------------------------------------------------------------------------------------------------------------------------------------------------------------------------------------------------------------------------------------------------------------------------------------------------------------------------------------------------------------|------------------------------------------------------------------------------------------------------------------------------------------------------------------------------------------------------------------------------------------------------------------------------------------------------------------------------------------------------------------------------------------------------------------------------------------------------|----------------------------------|-----------------------------|-----------------------------|
| GF0036419 | 0                             | 1                        | 0                        | Importin subunit alpha (1)                                       | cytoplasm [GO:0005737]<br>cellular_component (1); nucleus [GO:0005634 cellular_component] (1); protein transport activity [GO:0008586 molecular_function] (1); protein import into nucleus [GO:0006606 biological_process] (1); protein binding [GO:0005515 molecular_function] (1); binding [GO:0005488 molecular_function] (1)                                                                                                                           | Armadillo [IPR000225] (1); Armadillo-like helical [IPR011989] (1); Armadillo-type fold [IPR010424] (1); Importin-alpha, importin-beta-binding domain [IPR028623] (1)                                                                                                                                                                                                                                                                                 | -                                | C_unihit_00314_mRNA_22.1    | -                           |
| GF0036418 | 0                             | 1                        | 0                        | Wall-associated receptor kinase-like 20 (1)                      | polysaccharide binding [GO:0030247 molecular_function] (1)                                                                                                                                                                                                                                                                                                                                                                                                 | Wall-associated receptor kinase, galacturonan-binding domain [IPR025287] (1)                                                                                                                                                                                                                                                                                                                                                                         | -                                | C_unihit_00314_mRNA_15.1    | -                           |
| GF0036417 | 0                             | 1                        | 0                        | Hypothetical protein (1)                                         | -                                                                                                                                                                                                                                                                                                                                                                                                                                                          | -                                                                                                                                                                                                                                                                                                                                                                                                                                                    | -                                | C_unihit_00314_mRNA_10.1    | -                           |
| GF0036416 | 0                             | 1                        | 0                        | Hypothetical protein (1)                                         | -                                                                                                                                                                                                                                                                                                                                                                                                                                                          | -                                                                                                                                                                                                                                                                                                                                                                                                                                                    | -                                | C_unihit_00314_mRNA_1.1     | -                           |
| GF0036415 | 0                             | 1                        | 0                        | Hypothetical protein (1)                                         | protein binding [GO:0005515 molecular_function] (1); GTP binding [GO:0005524 molecular_function] (1)                                                                                                                                                                                                                                                                                                                                                       | Dynamin-type guanine nucleotide-binding (G) domain [IPR030381] (1); Dynamin superfamily [IPR022812] (1); Leucine-rich repeat, typical subtype [IPR003591] (1); Leucine-rich repeat domain, L domain-like [IPR020575] (1); Leucine-rich repeat 3 [IPR011713] (1); Leucine-rich repeat [IPR001611] (1); Pleckstrin homology domain [IPR018491] (1); PH domain-like [IPR01993] (1); P-loop containing nucleoside triphosphate hydrolase [IPR027417] (1) | -                                | C_unihit_00313_mRNA_8.2     | -                           |
| GF0036414 | 0                             | 1                        | 0                        | Hypothetical protein (1)                                         | -                                                                                                                                                                                                                                                                                                                                                                                                                                                          | -                                                                                                                                                                                                                                                                                                                                                                                                                                                    | -                                | C_unihit_00313_mRNA_26.1    | -                           |
| GF0036413 | 0                             | 1                        | 0                        | Hypothetical protein (1)                                         | -                                                                                                                                                                                                                                                                                                                                                                                                                                                          | -                                                                                                                                                                                                                                                                                                                                                                                                                                                    | -                                | C_unihit_00313_mRNA_20.1    | -                           |
| GF0036412 | 0                             | 1                        | 0                        | Hypothetical protein (1)                                         | -                                                                                                                                                                                                                                                                                                                                                                                                                                                          | -                                                                                                                                                                                                                                                                                                                                                                                                                                                    | -                                | C_unihit_00313_mRNA_19.1    | -                           |
| GF0036411 | 0                             | 1                        | 0                        | Hypothetical protein (1)                                         | -                                                                                                                                                                                                                                                                                                                                                                                                                                                          | -                                                                                                                                                                                                                                                                                                                                                                                                                                                    | -                                | C_unihit_00313_mRNA_13.1    | -                           |
| GF0036410 | 0                             | 1                        | 0                        | Caffeic acid 3-O-methyltransferase (1)                           | methyltransferase activity [GO:0008168 molecular_function] (1); O-methyltransferase activity [GO:0008171 molecular_function] (1)                                                                                                                                                                                                                                                                                                                           | O-methyltransferase COMT-type [IPR016461] (1); O-methyltransferase, family 2 [IPR010777] (1); S-adenosyl-L-methionine-dependent methyltransferase [IPR029063] (1)                                                                                                                                                                                                                                                                                    | -                                | C_unihit_00313_mRNA_11.1    | -                           |
| GF0036409 | 0                             | 1                        | 0                        | Hypothetical protein (1)                                         | -                                                                                                                                                                                                                                                                                                                                                                                                                                                          | -                                                                                                                                                                                                                                                                                                                                                                                                                                                    | -                                | C_unihit_00313_mRNA_10.1    | -                           |
| GF0036408 | 0                             | 1                        | 0                        | Hypothetical protein (1)                                         | -                                                                                                                                                                                                                                                                                                                                                                                                                                                          | -                                                                                                                                                                                                                                                                                                                                                                                                                                                    | -                                | C_unihit_00313_mRNA_1.1     | -                           |
| GF0036407 | 0                             | 1                        | 0                        | Hypothetical protein (1)                                         | drug transmembrane transport [GO:0006555 biological_process] (1); catalytic activity [GO:0003824 molecular_function] (1); transporter activity [GO:0015297 molecular_function] (1); drug transmembrane transporter activity [GO:0015238 molecular_function] (1); metabolic process [GO:0008152 biological_process] (1); membrane [GO:0016020 cellular_component] (1); transmembrane transport [GO:0055885 biological_process] (1)                          | AMP-dependent synthetase/ligase [IPR008731] (1); Meta-aminocobalamin extrusion protein [IPR020228] (1); AMP-binding enzyme C-terminal domain [IPR025110] (1); AMP-binding, conserved site [IPR020845] (1)                                                                                                                                                                                                                                            | -                                | C_unihit_00312_mRNA_36.1    | -                           |
| GF0036406 | 0                             | 1                        | 0                        | Putative serine/threonine-protein kinase Cxx2 (1)                | protein phosphorylation [GO:0006468 biological_process] (1); protein kinase activity [GO:0004702 molecular_function] (1); ATP binding [GO:0005524 molecular_function] (1)                                                                                                                                                                                                                                                                                  | Protein kinase domain [IPR000719] (1); Protein kinase-like domain [IPR011099] (1); Concanavalin A-like lectin (hemagglutinin domain) [IPR013201] (1); Serine/threonine-protein kinase, active site [IPR008271] (1); Protein kinase, ATP binding site [IPR017441] (1); Serine/threonine-tyrosine-protein kinase catalytic domain [IPR001245] (1)                                                                                                      | -                                | C_unihit_00312_mRNA_24.1    | -                           |
| GF0036405 | 0                             | 1                        | 0                        | Hypothetical protein (1)                                         | -                                                                                                                                                                                                                                                                                                                                                                                                                                                          | -                                                                                                                                                                                                                                                                                                                                                                                                                                                    | -                                | C_unihit_00312_mRNA_21.1    | -                           |
| GF0036404 | 0                             | 1                        | 0                        | Hypothetical protein (1)                                         | protein binding [GO:0005515 molecular_function] (1); calcium ion binding [GO:0005509 molecular_function] (1); integral component of membrane [GO:0016021 cellular_component] (1); defense response [GO:0006952 biological_process] (1)                                                                                                                                                                                                                     | EF-hand domain pair [IPR011992] (1); EF-hand domain [IPR002611] (1); EF-hand domain [IPR020488] (1); EF-Hand 1, calcium-binding site [IPR018247] (1)                                                                                                                                                                                                                                                                                                 | -                                | C_unihit_00312_mRNA_13.1    | -                           |
| GF0036403 | 0                             | 1                        | 0                        | Hypothetical protein (1)                                         | integral component of membrane [GO:0016021 cellular_component] (1); defense response [GO:0006952 biological_process] (1)                                                                                                                                                                                                                                                                                                                                   | Mlo-related protein [IPR04320] (1)                                                                                                                                                                                                                                                                                                                                                                                                                   | -                                | C_unihit_00312_mRNA_1.1     | -                           |
| GF0036402 | 0                             | 1                        | 0                        | Protein ARABIDILLO 1-like protein (1)                            | protein binding [GO:0005515 molecular_function] (1)                                                                                                                                                                                                                                                                                                                                                                                                        | F-box domain [IPR001810] (1)                                                                                                                                                                                                                                                                                                                                                                                                                         | -                                | C_unihit_00311_mRNA_6.1     | -                           |
| GF0036401 | 0                             | 1                        | 0                        | Hypothetical protein (1)                                         | RNA-DNA hybrid ribonuclease activity [GO:0004523 molecular_function] (1); zinc ion binding [GO:0008270 molecular_function] (1); nucleic acid binding [GO:0003676 molecular_function] (1)                                                                                                                                                                                                                                                                   | Zinc finger, CCHC-type [IPR001878] (1); Zinc knuckle, C2C2/SH3/HC [IPR028360] (1); Ribonuclease H domain [IPR021561] (1); Ribonuclease H-like domain [IPR021537] (1); Domain of unknown function DUF4293 [IPR025558] (1)                                                                                                                                                                                                                             | -                                | C_unihit_00311_mRNA_27.1    | -                           |
| GF0036400 | 0                             | 1                        | 0                        | Hypothetical protein (1)                                         | -                                                                                                                                                                                                                                                                                                                                                                                                                                                          | -                                                                                                                                                                                                                                                                                                                                                                                                                                                    | -                                | C_unihit_00311_mRNA_21.1    | -                           |
| GF0036399 | 0                             | 1                        | 0                        | Hypothetical protein (1)                                         | -                                                                                                                                                                                                                                                                                                                                                                                                                                                          | -                                                                                                                                                                                                                                                                                                                                                                                                                                                    | -                                | C_unihit_00311_mRNA_16.1    | -                           |
| GF0036398 | 0                             | 1                        | 0                        | Hypothetical protein (1)                                         | -                                                                                                                                                                                                                                                                                                                                                                                                                                                          | -                                                                                                                                                                                                                                                                                                                                                                                                                                                    | -                                | C_unihit_00310_mRNA_5.1     | -                           |
| GF0036397 | 0                             | 1                        | 0                        | Hypothetical protein (1)                                         | -                                                                                                                                                                                                                                                                                                                                                                                                                                                          | -                                                                                                                                                                                                                                                                                                                                                                                                                                                    | -                                | C_unihit_00310_mRNA_29.1    | -                           |
| GF0036396 | 0                             | 1                        | 0                        | UPF0481 protein (1)                                              | -                                                                                                                                                                                                                                                                                                                                                                                                                                                          | Protein of unknown function DUF247, plant [IPR041456] (1)                                                                                                                                                                                                                                                                                                                                                                                            | -                                | C_unihit_00310_mRNA_27.1    | -                           |
| GF0036395 | 0                             | 1                        | 0                        | Hypothetical protein (1)                                         | -                                                                                                                                                                                                                                                                                                                                                                                                                                                          | Protein of unknown function DUF247, plant [IPR041456] (1)                                                                                                                                                                                                                                                                                                                                                                                            | -                                | C_unihit_00310_mRNA_25.1    | -                           |
| GF0036394 | 0                             | 1                        | 0                        | Hypothetical protein (1)                                         | -                                                                                                                                                                                                                                                                                                                                                                                                                                                          | Retortransposon gag domain [IPR005162] (1)                                                                                                                                                                                                                                                                                                                                                                                                           | -                                | C_unihit_00310_mRNA_24.1    | -                           |
| GF0036393 | 0                             | 1                        | 0                        | Hypothetical protein (1)                                         | -                                                                                                                                                                                                                                                                                                                                                                                                                                                          | Retortransposon gag domain [IPR005162] (1)                                                                                                                                                                                                                                                                                                                                                                                                           | -                                | C_unihit_00309_mRNA_30.1    | -                           |
| GF0036392 | 0                             | 1                        | 0                        | Putative RNA-directed DNA polymerase (1)                         | nucleic acid binding [GO:0003676 molecular_function] (1); RNA-DNA hybrid ribonuclease activity [GO:0004523 molecular_function] (1)                                                                                                                                                                                                                                                                                                                         | Endonuclease/exonuclease/phosphatase [IPR001351] (1); Ribonuclease H-like domain [IPR021537] (1); Reverse transcriptase zinc-binding domain [IPR020600] (1); Ribonuclease H domain [IPR021561] (1)                                                                                                                                                                                                                                                   | -                                | C_unihit_00309_mRNA_27.1    | -                           |
| GF0036391 | 0                             | 1                        | 0                        | Hypothetical protein (1)                                         | nucleic acid binding [GO:0003676 molecular_function] (1); zinc ion binding [GO:0008270 molecular_function] (1)                                                                                                                                                                                                                                                                                                                                             | Zinc finger, CCHC-type [IPR001878] (1); Domain of unknown function DUF4219 [IPR025314] (1)                                                                                                                                                                                                                                                                                                                                                           | -                                | C_unihit_00309_mRNA_21.1    | -                           |
| GF0036390 | 0                             | 1                        | 0                        | Hypothetical protein (1)                                         | -                                                                                                                                                                                                                                                                                                                                                                                                                                                          | -                                                                                                                                                                                                                                                                                                                                                                                                                                                    | -                                | C_unihit_00309_mRNA_19.1    | -                           |
| GF0036389 | 0                             | 1                        | 0                        | Hypothetical protein (1)                                         | -                                                                                                                                                                                                                                                                                                                                                                                                                                                          | -                                                                                                                                                                                                                                                                                                                                                                                                                                                    | -                                | C_unihit_00309_mRNA_1.1     | -                           |
| GF0036388 | 0                             | 1                        | 0                        | Hypothetical protein (1)                                         | -                                                                                                                                                                                                                                                                                                                                                                                                                                                          | -                                                                                                                                                                                                                                                                                                                                                                                                                                                    | -                                | C_unihit_00308_mRNA_9.1     | -                           |
| GF0036387 | 0                             | 1                        | 0                        | Hypothetical protein (1)                                         | RNA-DNA hybrid ribonuclease activity [GO:0004523 molecular_function] (1); nucleic acid binding [GO:0003676 molecular_function] (1)                                                                                                                                                                                                                                                                                                                         | Endonuclease/exonuclease/phosphatase [IPR001351] (1); Ribonuclease H-like domain [IPR021537] (1); Reverse transcriptase zinc-binding domain [IPR020600] (1); Ribonuclease H domain [IPR021561] (1)                                                                                                                                                                                                                                                   | -                                | C_unihit_00308_mRNA_8.1     | -                           |
| GF0036386 | 0                             | 1                        | 0                        | Hypothetical protein (1)                                         | -                                                                                                                                                                                                                                                                                                                                                                                                                                                          | -                                                                                                                                                                                                                                                                                                                                                                                                                                                    | -                                | C_unihit_00308_mRNA_7.1     | -                           |
| GF0036385 | 0                             | 1                        | 0                        | Hypothetical protein (1)                                         | -                                                                                                                                                                                                                                                                                                                                                                                                                                                          | -                                                                                                                                                                                                                                                                                                                                                                                                                                                    | -                                | C_unihit_00308_mRNA_5.1     | -                           |
| GF0036384 | 0                             | 1                        | 0                        | Hypothetical protein (1)                                         | -                                                                                                                                                                                                                                                                                                                                                                                                                                                          | -                                                                                                                                                                                                                                                                                                                                                                                                                                                    | -                                | C_unihit_00308_mRNA_4.1     | -                           |
| GF0036383 | 0                             | 1                        | 0                        | Hypothetical protein (1)                                         | -                                                                                                                                                                                                                                                                                                                                                                                                                                                          | -                                                                                                                                                                                                                                                                                                                                                                                                                                                    | -                                | C_unihit_00308_mRNA_31.1    | -                           |
| GF0036382 | 0                             | 1                        | 0                        | Hypothetical protein (1)                                         | -                                                                                                                                                                                                                                                                                                                                                                                                                                                          | -                                                                                                                                                                                                                                                                                                                                                                                                                                                    | -                                | C_unihit_00308_mRNA_23.1    | -                           |
| GF0036381 | 0                             | 1                        | 0                        | Hypothetical protein (1)                                         | phosphatase activity [GO:0016791 molecular_function] (1); protein tyrosine phosphatase activity [GO:0004725 molecular_function] (1); dephosphorylation [GO:0016311 biological_process] (1)                                                                                                                                                                                                                                                                 | Protein-tyrosine phosphatase, active site [IPR016303] (1); Myosinblu-like phosphatase domain [IPR016569] (1); Myosinblu-like phosphatase-like domain [IPR030564] (1); Protein-tyrosine phosphatase-like [IPR029021] (1)                                                                                                                                                                                                                              | -                                | C_unihit_00308_mRNA_18.1    | -                           |
| GF0036380 | 0                             | 1                        | 0                        | Hypothetical protein (1)                                         | -                                                                                                                                                                                                                                                                                                                                                                                                                                                          | Retortransposon gag domain [IPR005162] (1); Aspartate/glutamate/valylate kinase [IPR010484] (1)                                                                                                                                                                                                                                                                                                                                                      | -                                | C_unihit_00308_mRNA_16.1    | -                           |
| GF0036379 | 0                             | 1                        | 0                        | Hypothetical protein (1)                                         | -                                                                                                                                                                                                                                                                                                                                                                                                                                                          | -                                                                                                                                                                                                                                                                                                                                                                                                                                                    | -                                | C_unihit_00308_mRNA_15.1    | -                           |
| GF0036378 | 0                             | 1                        | 0                        | Hypothetical protein (1)                                         | -                                                                                                                                                                                                                                                                                                                                                                                                                                                          | -                                                                                                                                                                                                                                                                                                                                                                                                                                                    | -                                | C_unihit_00308_mRNA_11.1    | -                           |
| GF0036377 | 0                             | 1                        | 0                        | Hypothetical protein (1)                                         | -                                                                                                                                                                                                                                                                                                                                                                                                                                                          | -                                                                                                                                                                                                                                                                                                                                                                                                                                                    | -                                | C_unihit_00307_mRNA_33.1    | -                           |
| GF0036376 | 0                             | 1                        | 0                        | Peptide transporter (1)                                          | transporter activity [GO:0005215 molecular_function] (1); membrane [GO:0016020 cellular_component] (1); transport [GO:0006410 biological_process] (1)                                                                                                                                                                                                                                                                                                      | Proton-dependent oligopeptide transporter family [IPR000109] (1); Major facilitator superfamily domain [IPR020846] (1)                                                                                                                                                                                                                                                                                                                               | -                                | C_unihit_00307_mRNA_32.1    | -                           |
| GF0036375 | 0                             | 1                        | 0                        | Hypothetical protein (1)                                         | -                                                                                                                                                                                                                                                                                                                                                                                                                                                          | -                                                                                                                                                                                                                                                                                                                                                                                                                                                    | -                                | C_unihit_00307_mRNA_2.1     | -                           |
| GF0036374 | 0                             | 1                        | 0                        | Hypothetical protein (1)                                         | zinc ion binding [GO:0008270 molecular_function] (1)                                                                                                                                                                                                                                                                                                                                                                                                       | DYW domain [IPR032867] (1); Pentapeptide repeat [IPR022855] (1)                                                                                                                                                                                                                                                                                                                                                                                      | -                                | C_unihit_00307_mRNA_17.1    | -                           |
| GF0036373 | 0                             | 1                        | 0                        | Hypothetical protein (1)                                         | -                                                                                                                                                                                                                                                                                                                                                                                                                                                          | -                                                                                                                                                                                                                                                                                                                                                                                                                                                    | -                                | C_unihit_00307_mRNA_1.1     | -                           |
| GF0036372 | 0                             | 1                        | 0                        | Hypothetical protein (1)                                         | cell redox homeostasis [GO:0045444 biological_process] (1)                                                                                                                                                                                                                                                                                                                                                                                                 | Thioredoxin domain [IPR013766] (1); Thioredoxin-like fold [IPR012336] (1)                                                                                                                                                                                                                                                                                                                                                                            | -                                | C_unihit_00306_mRNA_7.1     | -                           |
| GF0036371 | 0                             | 1                        | 0                        | Cellular nucleic acid-binding protein (1)                        | -                                                                                                                                                                                                                                                                                                                                                                                                                                                          | Aspartate peptidase domain [IPR021199] (1)                                                                                                                                                                                                                                                                                                                                                                                                           | -                                | C_unihit_00306_mRNA_3.1     | -                           |
| GF0036370 | 0                             | 1                        | 0                        | Hypothetical protein (1)                                         | -                                                                                                                                                                                                                                                                                                                                                                                                                                                          | -                                                                                                                                                                                                                                                                                                                                                                                                                                                    | -                                | C_unihit_00306_mRNA_2.1     | -                           |
| GF0036369 | 0                             | 1                        | 0                        | Hypothetical protein (1)                                         | -                                                                                                                                                                                                                                                                                                                                                                                                                                                          | Retortransposon gag domain [IPR005162] (1)                                                                                                                                                                                                                                                                                                                                                                                                           | -                                | C_unihit_00306_mRNA_1.1     | -                           |
| GF0036368 | 0                             | 1                        | 0                        | Hypothetical protein (1)                                         | -                                                                                                                                                                                                                                                                                                                                                                                                                                                          | Retortransposon gag domain [IPR005162] (1)                                                                                                                                                                                                                                                                                                                                                                                                           | -                                | C_unihit_00305_mRNA_30.1    | -                           |
| GF0036367 | 0                             | 1                        | 0                        | Transcription factor Par-alpha 1 (1)                             | -                                                                                                                                                                                                                                                                                                                                                                                                                                                          | Putative zinc element binding protein family [IPR006628] (1)                                                                                                                                                                                                                                                                                                                                                                                         | -                                | C_unihit_00305_mRNA_29.1    | -                           |
| GF0036366 | 0                             | 1                        | 0                        | Hypothetical protein (1)                                         | adenylate kinase activity [GO:0004017 molecular_function] (1); integral component of membrane [GO:0016021 cellular_component] (1); nucleoside-containing compound metabolic process [GO:0006139 biological_process] (1); nucleoside-containing compound kinase activity [GO:0019026 molecular_function] (1); phosphotransferase activity, phosphate group as acceptor [GO:0016776 molecular_function] (1); ATP binding [GO:0005524 molecular_function] (1) | P-loop containing nucleoside triphosphate hydrolase [IPR027417] (1); Adenylate kinase subfamily [IPR006259] (1); Nucleosium (TMS) [IPR002540] (1); Domain of unknown function DUF1995 [IPR019962] (1); Adenylate kinase, active site lid domain [IPR007862] (1); Adenylate kinase UMP-CMP kinase [IPR006850] (1)                                                                                                                                     | -                                | C_unihit_00305_mRNA_25.1    | -                           |
| GF0036365 | 0                             | 1                        | 0                        | Hypothetical protein (1)                                         | -                                                                                                                                                                                                                                                                                                                                                                                                                                                          | -                                                                                                                                                                                                                                                                                                                                                                                                                                                    | -                                | C_unihit_00305_mRNA_17.1    | -                           |
| GF0036364 | 0                             | 1                        | 0                        | Disease resistance protein (CC-NBS-LRR class) family protein (1) | ADP binding [GO:0044331 molecular_function] (1); protein binding [GO:0005515 molecular_function] (1)                                                                                                                                                                                                                                                                                                                                                       | P-loop containing nucleoside triphosphate hydrolase [IPR027417] (1); Leucine-rich repeat [IPR010111] (1); NB-ARC [IPR021821] (1); Leucine-rich repeat domain, L domain-like [IPR032675] (1)                                                                                                                                                                                                                                                          | -                                | C_unihit_00304_mRNA_9.1     | -                           |
| GF0036363 | 0                             | 1                        | 0                        | Hypothetical protein (1)                                         | -                                                                                                                                                                                                                                                                                                                                                                                                                                                          | -                                                                                                                                                                                                                                                                                                                                                                                                                                                    | -                                | C_unihit_00304_mRNA_8.1     | -                           |

| ID        | Num. in C. crottensteini | Num. in C. auris | Num. in P. putida | Note                                                                                       | GO                                                                                                                                                                                                                                                                                                                                                                                                                                                                                                                             | InterPro                                                                                                                                                                                                                                           | Members in C. crottensteini | Members in C. auris     | Members in P. putida |
|-----------|--------------------------|------------------|-------------------|--------------------------------------------------------------------------------------------|--------------------------------------------------------------------------------------------------------------------------------------------------------------------------------------------------------------------------------------------------------------------------------------------------------------------------------------------------------------------------------------------------------------------------------------------------------------------------------------------------------------------------------|----------------------------------------------------------------------------------------------------------------------------------------------------------------------------------------------------------------------------------------------------|-----------------------------|-------------------------|----------------------|
| GF0036362 | 0                        | 1                | 0                 | Hypothetical protein (1)                                                                   | binding [GO:005488 molecular_function] (1); protein binding [GO:0005515 molecular_function] (1)                                                                                                                                                                                                                                                                                                                                                                                                                                | Armaddillo-type fold [IPR016024] (1); Armaddillo [IPR000252] (1); Atypical Arm repeat [IPR032413] (1); Armaddillo-like helical [IPR011989] (1)                                                                                                     | -                           | C_ushii_00304_mRNA_6.1  | -                    |
| GF0036361 | 0                        | 1                | 0                 | Hypothetical protein (1)                                                                   | binding [GO:005488 molecular_function] (1); protein binding [GO:0005515 molecular_function] (1)                                                                                                                                                                                                                                                                                                                                                                                                                                | Armaddillo-like helical [IPR011989] (1); Armaddillo-type fold [IPR016024] (1)                                                                                                                                                                      | -                           | C_ushii_00304_mRNA_30.1 | -                    |
| GF0036360 | 0                        | 1                | 0                 | Hypothetical protein (1)                                                                   | binding [GO:005488 molecular_function] (1); protein binding [GO:0005515 molecular_function] (1)                                                                                                                                                                                                                                                                                                                                                                                                                                | Armaddillo-like helical [IPR011989] (1); Armaddillo-type fold [IPR016024] (1)                                                                                                                                                                      | -                           | C_ushii_00304_mRNA_29.1 | -                    |
| GF0036359 | 0                        | 1                | 0                 | Importin subunit alpha (1)                                                                 | binding [GO:005488 molecular_function] (1); protein binding [GO:0005515 molecular_function] (1)                                                                                                                                                                                                                                                                                                                                                                                                                                | Armaddillo-type fold [IPR016024] (1); Armaddillo [IPR000252] (1); Armaddillo-like helical [IPR011989] (1)                                                                                                                                          | -                           | C_ushii_00304_mRNA_28.1 | -                    |
| GF0036358 | 0                        | 1                | 0                 | Disease resistance protein RPS2 (1)                                                        | protein binding [GO:0005515 molecular_function] (1); ADP binding [GO:0045531 molecular_function] (1)                                                                                                                                                                                                                                                                                                                                                                                                                           | Leucine-rich repeat domain, L domain-like [IPR02675] (1); P-loop containing nucleoside triphosphate hydrolase [IPR027417] (1); Leucine-rich repeat [IPR016111] (1); NB-ARC [IPR002182] (1)                                                         | -                           | C_ushii_00304_mRNA_27.1 | -                    |
| GF0036357 | 0                        | 1                | 0                 | Potato DNA for copia-like transposable element (1)                                         | -                                                                                                                                                                                                                                                                                                                                                                                                                                                                                                                              | Reverse transcriptase, RNA-dependent DNA polymerase [IPR013103] (1)                                                                                                                                                                                | -                           | C_ushii_00304_mRNA_25.1 | -                    |
| GF0036356 | 0                        | 1                | 0                 | Hypothetical protein (1)                                                                   | -                                                                                                                                                                                                                                                                                                                                                                                                                                                                                                                              | -                                                                                                                                                                                                                                                  | -                           | C_ushii_00304_mRNA_24.1 | -                    |
| GF0036355 | 0                        | 1                | 0                 | Hypothetical protein (1)                                                                   | -                                                                                                                                                                                                                                                                                                                                                                                                                                                                                                                              | -                                                                                                                                                                                                                                                  | -                           | C_ushii_00304_mRNA_22.1 | -                    |
| GF0036354 | 0                        | 1                | 0                 | Hypothetical protein (1)                                                                   | nucleic acid binding [GO:0003676 molecular_function] (1)                                                                                                                                                                                                                                                                                                                                                                                                                                                                       | Ribonuclease H-like domain [IPR012337] (1)                                                                                                                                                                                                         | -                           | C_ushii_00304_mRNA_21.1 | -                    |
| GF0036353 | 0                        | 1                | 0                 | Hypothetical protein (1)                                                                   | -                                                                                                                                                                                                                                                                                                                                                                                                                                                                                                                              | -                                                                                                                                                                                                                                                  | -                           | C_ushii_00304_mRNA_17.1 | -                    |
| GF0036352 | 0                        | 1                | 0                 | Hypothetical protein (1)                                                                   | ADP binding [GO:0045351 molecular_function] (1)                                                                                                                                                                                                                                                                                                                                                                                                                                                                                | P-loop containing nucleoside triphosphate hydrolase [IPR027417] (1); NB-ARC [IPR002182] (1)                                                                                                                                                        | -                           | C_ushii_00304_mRNA_16.1 | -                    |
| GF0036351 | 0                        | 1                | 0                 | Hypothetical protein (1)                                                                   | -                                                                                                                                                                                                                                                                                                                                                                                                                                                                                                                              | -                                                                                                                                                                                                                                                  | -                           | C_ushii_00304_mRNA_14.1 | -                    |
| GF0036350 | 0                        | 1                | 0                 | Importin subunit alpha (1)                                                                 | binding [GO:005488 molecular_function] (1); protein binding [GO:0005515 molecular_function] (1)                                                                                                                                                                                                                                                                                                                                                                                                                                | Armaddillo-like helical [IPR011989] (1); Armaddillo [IPR000252] (1); Atypical Arm repeat [IPR032413] (1); Armaddillo-type fold [IPR016024] (1)                                                                                                     | -                           | C_ushii_00304_mRNA_11.1 | -                    |
| GF0036349 | 0                        | 1                | 0                 | Hypothetical protein (1)                                                                   | -                                                                                                                                                                                                                                                                                                                                                                                                                                                                                                                              | -                                                                                                                                                                                                                                                  | -                           | C_ushii_00304_mRNA_10.1 | -                    |
| GF0036348 | 0                        | 1                | 0                 | Hypothetical protein (1)                                                                   | -                                                                                                                                                                                                                                                                                                                                                                                                                                                                                                                              | -                                                                                                                                                                                                                                                  | -                           | C_ushii_00304_mRNA_1.1  | -                    |
| GF0036347 | 0                        | 1                | 0                 | Calcium-transporting ATPase 8, plasma membrane-type-like protein (1)                       | magnesium ion transport [GO:0015693 biological_process] (1); integral component of membrane [GO:0016021 cellular_component] (1); magnesium-transporting ATPase activity [GO:0015444 molecular_function] (1); transmembrane transport [GO:0055085 biological_process] (1); antiporter activity [GO:0015297 molecular_function] (1); drug transmembrane transporter activity [GO:0015239 molecular_function] (1); membrane [GO:0016020 cellular_component] (1); drug transmembrane transport [GO:0006855 biological_process] (1) | HAD-like domain [IPR032241] (1); P-type ATPase, transmembrane domain [IPR025298] (1); P-type ATPase [IPR015713] (1); P-type ATPase subfamily IIB [IPR006415] (1)                                                                                   | -                           | C_ushii_00303_mRNA_15.1 | -                    |
| GF0036346 | 0                        | 1                | 0                 | Protein DETOXIFICATION 27 (1)                                                              | -                                                                                                                                                                                                                                                                                                                                                                                                                                                                                                                              | Multi antimicrobial extrusion protein [IPR025258] (1)                                                                                                                                                                                              | -                           | C_ushii_00303_mRNA_11.1 | -                    |
| GF0036345 | 0                        | 1                | 0                 | Retronasoprotein, putative, Tyi-copia subfamily (1)                                        | -                                                                                                                                                                                                                                                                                                                                                                                                                                                                                                                              | -                                                                                                                                                                                                                                                  | -                           | C_ushii_00302_mRNA_33.1 | -                    |
| GF0036344 | 0                        | 1                | 0                 | Hypothetical protein (1)                                                                   | -                                                                                                                                                                                                                                                                                                                                                                                                                                                                                                                              | -                                                                                                                                                                                                                                                  | -                           | C_ushii_00302_mRNA_28.1 | -                    |
| GF0036343 | 0                        | 1                | 0                 | Hypothetical protein (1)                                                                   | -                                                                                                                                                                                                                                                                                                                                                                                                                                                                                                                              | -                                                                                                                                                                                                                                                  | -                           | C_ushii_00302_mRNA_23.1 | -                    |
| GF0036342 | 0                        | 1                | 0                 | Cytokinin riboside 5'-monophosphate phosphoribosyltransferase (1)                          | ATP binding [GO:0005524 molecular_function] (1); ATP biosynthetic process [GO:0006233 biological_process] (1); thymidylate kinase activity [GO:0004798 molecular_function] (1)                                                                                                                                                                                                                                                                                                                                                 | Thymidylate kinase, conserved site [IPR018095] (1); P-loop containing nucleoside triphosphate hydrolase [IPR027417] (1)                                                                                                                            | -                           | C_ushii_00302_mRNA_2.1  | -                    |
| GF0036341 | 0                        | 1                | 0                 | Hypothetical protein (1)                                                                   | lipid metabolic process [GO:0006629 biological_process] (1)                                                                                                                                                                                                                                                                                                                                                                                                                                                                    | Fungal lipase-like domain [IPR02921] (1); Alpha/Beta hydrolase fold [IPR029058] (1)                                                                                                                                                                | -                           | C_ushii_00302_mRNA_18.1 | -                    |
| GF0036340 | 0                        | 1                | 0                 | Hypothetical protein (1)                                                                   | -                                                                                                                                                                                                                                                                                                                                                                                                                                                                                                                              | -                                                                                                                                                                                                                                                  | -                           | C_ushii_00302_mRNA_14.1 | -                    |
| GF0036339 | 0                        | 1                | 0                 | Hypothetical protein (1)                                                                   | -                                                                                                                                                                                                                                                                                                                                                                                                                                                                                                                              | -                                                                                                                                                                                                                                                  | -                           | C_ushii_00302_mRNA_12.1 | -                    |
| GF0036338 | 0                        | 1                | 0                 | Hypothetical protein (1)                                                                   | -                                                                                                                                                                                                                                                                                                                                                                                                                                                                                                                              | -                                                                                                                                                                                                                                                  | -                           | C_ushii_00302_mRNA_10.1 | -                    |
| GF0036337 | 0                        | 1                | 0                 | Hypothetical protein (1)                                                                   | cysteine-type peptidase activity [GO:0008234 molecular_function] (1)                                                                                                                                                                                                                                                                                                                                                                                                                                                           | Peptidase C1A [IPR013128] (1); Calpain propylamide inhibitor domain [IPR013201] (1)                                                                                                                                                                | -                           | C_ushii_00301_mRNA_8.1  | -                    |
| GF0036336 | 0                        | 1                | 0                 | Hypothetical protein (1)                                                                   | -                                                                                                                                                                                                                                                                                                                                                                                                                                                                                                                              | Leucine-rich repeat domain, L domain-like [IPR02675] (1)                                                                                                                                                                                           | -                           | C_ushii_00301_mRNA_3.1  | -                    |
| GF0036335 | 0                        | 1                | 0                 | Zeaxanthin epoxidase, chloroplast (1)                                                      | FAD binding [GO:0071949 molecular_function] (1); oxidation-reduction process [GO:0055114 biological_process] (1); oxidoreductase activity [GO:0001649 molecular_function] (1); protein binding [GO:0005515 molecular_function] (1)                                                                                                                                                                                                                                                                                             | FAD/NAD(P)-binding domain [IPR027375] (1); Folate-associated (FHA) domain [IPR002525] (1); SMAD/FHA domain [IPR008951] (1); FAD-binding domain [IPR002958] (1)                                                                                     | -                           | C_ushii_00301_mRNA_27.2 | -                    |
| GF0036334 | 0                        | 1                | 0                 | Putative P-loop containing nucleoside triphosphate hydrolases superfamily protein-like (1) | ATP binding [GO:0005524 molecular_function] (1); microtubule binding [GO:0008017 molecular_function] (1); microtubule motor activity [GO:0003777 molecular_function] (1); microtubule-based movement [GO:0007018 biological_process] (1)                                                                                                                                                                                                                                                                                       | P-loop containing nucleoside triphosphate hydrolase [IPR027417] (1); Kinasin motor domain [IPR01752] (1); Kinasin-like protein [IPR027640] (1)                                                                                                     | -                           | C_ushii_00301_mRNA_17.1 | -                    |
| GF0036333 | 0                        | 1                | 0                 | Hypothetical protein (1)                                                                   | -                                                                                                                                                                                                                                                                                                                                                                                                                                                                                                                              | Pentapeptide repeat [IPR02885] (1)                                                                                                                                                                                                                 | -                           | C_ushii_00300_mRNA_7.1  | -                    |
| GF0036332 | 0                        | 1                | 0                 | Hypothetical protein (1)                                                                   | -                                                                                                                                                                                                                                                                                                                                                                                                                                                                                                                              | -                                                                                                                                                                                                                                                  | -                           | C_ushii_00300_mRNA_6.1  | -                    |
| GF0036331 | 0                        | 1                | 0                 | Hypothetical protein (1)                                                                   | -                                                                                                                                                                                                                                                                                                                                                                                                                                                                                                                              | -                                                                                                                                                                                                                                                  | -                           | C_ushii_00300_mRNA_5.1  | -                    |
| GF0036330 | 0                        | 1                | 0                 | Hypothetical protein (1)                                                                   | -                                                                                                                                                                                                                                                                                                                                                                                                                                                                                                                              | -                                                                                                                                                                                                                                                  | -                           | C_ushii_00300_mRNA_4.1  | -                    |
| GF0036329 | 0                        | 1                | 0                 | Hypothetical protein (1)                                                                   | cysteine-type peptidase activity [GO:0008234 molecular_function] (1); proteolysis [GO:0006508 biological_process] (1)                                                                                                                                                                                                                                                                                                                                                                                                          | Ulp1 protease family, C-terminal catalytic domain [IPR003653] (1)                                                                                                                                                                                  | -                           | C_ushii_00300_mRNA_30.1 | -                    |
| GF0036328 | 0                        | 1                | 0                 | Hypothetical protein (1)                                                                   | -                                                                                                                                                                                                                                                                                                                                                                                                                                                                                                                              | -                                                                                                                                                                                                                                                  | -                           | C_ushii_00300_mRNA_24.1 | -                    |
| GF0036327 | 0                        | 1                | 0                 | Hypothetical protein (1)                                                                   | -                                                                                                                                                                                                                                                                                                                                                                                                                                                                                                                              | -                                                                                                                                                                                                                                                  | -                           | C_ushii_00300_mRNA_2.1  | -                    |
| GF0036326 | 0                        | 1                | 0                 | Hypothetical protein (1)                                                                   | -                                                                                                                                                                                                                                                                                                                                                                                                                                                                                                                              | -                                                                                                                                                                                                                                                  | -                           | C_ushii_00300_mRNA_13.1 | -                    |
| GF0036325 | 0                        | 1                | 0                 | Hypothetical protein (1)                                                                   | -                                                                                                                                                                                                                                                                                                                                                                                                                                                                                                                              | -                                                                                                                                                                                                                                                  | -                           | C_ushii_00300_mRNA_1.1  | -                    |
| GF0036324 | 0                        | 1                | 0                 | Hypothetical protein (1)                                                                   | -                                                                                                                                                                                                                                                                                                                                                                                                                                                                                                                              | -                                                                                                                                                                                                                                                  | -                           | C_ushii_00299_mRNA_46.1 | -                    |
| GF0036323 | 0                        | 1                | 0                 | Hypothetical protein (1)                                                                   | adenosylhomocysteine activity [GO:004813 molecular_function] (1); one-carbon metabolic process [GO:0006790 biological_process] (1)                                                                                                                                                                                                                                                                                                                                                                                             | S-adenosyl-L-homocysteine hydrolase, NAD binding domain [IPR018578] (1); NAD(P)-binding domain [IPR016048] (1); Adenosylhomocysteine [IPR000043] (1)                                                                                               | -                           | C_ushii_00299_mRNA_20.1 | -                    |
| GF0036322 | 0                        | 1                | 0                 | Hypothetical protein (1)                                                                   | -                                                                                                                                                                                                                                                                                                                                                                                                                                                                                                                              | -                                                                                                                                                                                                                                                  | -                           | C_ushii_00299_mRNA_1.1  | -                    |
| GF0036321 | 0                        | 1                | 0                 | Hypothetical protein (1)                                                                   | -                                                                                                                                                                                                                                                                                                                                                                                                                                                                                                                              | -                                                                                                                                                                                                                                                  | -                           | C_ushii_00298_mRNA_5.1  | -                    |
| GF0036320 | 0                        | 1                | 0                 | Hypothetical protein (1)                                                                   | -                                                                                                                                                                                                                                                                                                                                                                                                                                                                                                                              | -                                                                                                                                                                                                                                                  | -                           | C_ushii_00298_mRNA_29.1 | -                    |
| GF0036319 | 0                        | 1                | 0                 | Hypothetical protein (1)                                                                   | -                                                                                                                                                                                                                                                                                                                                                                                                                                                                                                                              | -                                                                                                                                                                                                                                                  | -                           | C_ushii_00298_mRNA_28.1 | -                    |
| GF0036318 | 0                        | 1                | 0                 | Hypothetical protein (1)                                                                   | -                                                                                                                                                                                                                                                                                                                                                                                                                                                                                                                              | -                                                                                                                                                                                                                                                  | -                           | C_ushii_00298_mRNA_25.1 | -                    |
| GF0036317 | 0                        | 1                | 0                 | Hypothetical protein (1)                                                                   | -                                                                                                                                                                                                                                                                                                                                                                                                                                                                                                                              | Zinc knuckle CXXC/HEXG [IPR025836] (1); Domain of unknown function DUF4285 [IPR025558] (1)                                                                                                                                                         | -                           | C_ushii_00298_mRNA_2.1  | -                    |
| GF0036316 | 0                        | 1                | 0                 | ATP sulfurylase (1)                                                                        | sulfite adenylyltransferase (ATP) activity [GO:0004781 molecular_function] (1)                                                                                                                                                                                                                                                                                                                                                                                                                                                 | adenylyltransferase catalytic domain [IPR025951] (1); PUA-like domain [IPR015947] (1); ATP-sulfurylase PUA-like domain [IPR025980] (1)                                                                                                             | -                           | C_ushii_00298_mRNA_17.1 | -                    |
| GF0036315 | 0                        | 1                | 0                 | Iron-sulfur cluster assembly enzyme ISCU, mitochondrial (1)                                | iron-sulfur cluster binding [GO:0051536 molecular_function] (1); iron-sulfur cluster assembly [GO:0016226 biological_process] (1); iron ion binding [GO:0005506 molecular_function] (1)                                                                                                                                                                                                                                                                                                                                        | NIF system FeS cluster assembly, NRU, N-terminal [IPR002871] (1)                                                                                                                                                                                   | -                           | C_ushii_00297_mRNA_8.1  | -                    |
| GF0036314 | 0                        | 1                | 0                 | Hypothetical protein (1)                                                                   | -                                                                                                                                                                                                                                                                                                                                                                                                                                                                                                                              | -                                                                                                                                                                                                                                                  | -                           | C_ushii_00297_mRNA_4.1  | -                    |
| GF0036313 | 0                        | 1                | 0                 | Hypothetical protein (1)                                                                   | -                                                                                                                                                                                                                                                                                                                                                                                                                                                                                                                              | -                                                                                                                                                                                                                                                  | -                           | C_ushii_00297_mRNA_22.1 | -                    |
| GF0036312 | 0                        | 1                | 0                 | Hypothetical protein (1)                                                                   | -                                                                                                                                                                                                                                                                                                                                                                                                                                                                                                                              | -                                                                                                                                                                                                                                                  | -                           | C_ushii_00297_mRNA_2.1  | -                    |
| GF0036311 | 0                        | 1                | 0                 | Hypothetical protein (1)                                                                   | -                                                                                                                                                                                                                                                                                                                                                                                                                                                                                                                              | -                                                                                                                                                                                                                                                  | -                           | C_ushii_00297_mRNA_19.1 | -                    |
| GF0036310 | 0                        | 1                | 0                 | Hypothetical protein (1)                                                                   | -                                                                                                                                                                                                                                                                                                                                                                                                                                                                                                                              | -                                                                                                                                                                                                                                                  | -                           | C_ushii_00297_mRNA_18.1 | -                    |
| GF0036309 | 0                        | 1                | 0                 | Hypothetical protein (1)                                                                   | -                                                                                                                                                                                                                                                                                                                                                                                                                                                                                                                              | -                                                                                                                                                                                                                                                  | -                           | C_ushii_00297_mRNA_16.1 | -                    |
| GF0036308 | 0                        | 1                | 0                 | Hypothetical protein (1)                                                                   | transmembrane transporter activity [GO:0022857 molecular_function] (1); integral component of membrane [GO:0016021 cellular_component] (1)                                                                                                                                                                                                                                                                                                                                                                                     | WAT1-related protein [IPR030184] (1)                                                                                                                                                                                                               | -                           | C_ushii_00297_mRNA_12.1 | -                    |
| GF0036307 | 0                        | 1                | 0                 | Hypothetical protein (1)                                                                   | cysteine-type peptidase activity [GO:0008234 molecular_function] (1); proteolysis [GO:0006508 biological_process] (1)                                                                                                                                                                                                                                                                                                                                                                                                          | Domain of unknown function DUF1985 [IPR015410] (1); Ulp1 protease family, C-terminal catalytic domain [IPR003653] (1)                                                                                                                              | -                           | C_ushii_00296_mRNA_7.1  | -                    |
| GF0036306 | 0                        | 1                | 0                 | Hypothetical protein (1)                                                                   | hydrogen ion transmembrane transporter activity [GO:0019078 molecular_function] (1); mitochondrial proton-transporting ATP synthase complex, coupling factor F0 [GO:0000276 cellular_component] (1); ATP synthase coupled proton transport [GO:0015986 biological_process] (1)                                                                                                                                                                                                                                                 | Phospholipase A2, histidine active site [IPR031311] (1); Phospholipase A2 domain [IPR016090] (1); ATPase, F0 complex, subunit G, mitochondrial [IPR006808] (1)                                                                                     | -                           | C_ushii_00296_mRNA_6.1  | -                    |
| GF0036305 | 0                        | 1                | 0                 | Hypothetical protein (1)                                                                   | -                                                                                                                                                                                                                                                                                                                                                                                                                                                                                                                              | -                                                                                                                                                                                                                                                  | -                           | C_ushii_00296_mRNA_21.1 | -                    |
| GF0036304 | 0                        | 1                | 0                 | Hypothetical protein (1)                                                                   | -                                                                                                                                                                                                                                                                                                                                                                                                                                                                                                                              | -                                                                                                                                                                                                                                                  | -                           | C_ushii_00296_mRNA_20.1 | -                    |
| GF0036303 | 0                        | 1                | 0                 | Chaperonin CPN60-2, mitochondrial (1)                                                      | cytoplasm [GO:0005737 cellular_component] (1); ATP binding [GO:0005524 molecular_function] (1); protein folding [GO:0006457 biological_process] (1)                                                                                                                                                                                                                                                                                                                                                                            | Chaperonin Cpn60, conserved site [IPR018370] (1); GroEL-like epical domain [IPR027409] (1); TCP-1-like chaperonin intermediate domain [IPR027410] (1); Chaperonin Cpn60 TCP-1 family [IPR002423] (1); GroEL-like equatorial domain [IPR027413] (1) | -                           | C_ushii_00296_mRNA_19.1 | -                    |
| GF0036302 | 0                        | 1                | 0                 | Hypothetical protein (1)                                                                   | -                                                                                                                                                                                                                                                                                                                                                                                                                                                                                                                              | -                                                                                                                                                                                                                                                  | -                           | C_ushii_00296_mRNA_18.1 | -                    |
| GF0036301 | 0                        | 1                | 0                 | Hypothetical protein (1)                                                                   | -                                                                                                                                                                                                                                                                                                                                                                                                                                                                                                                              | -                                                                                                                                                                                                                                                  | -                           | C_ushii_00296_mRNA_17.1 | -                    |
| GF0036300 | 0                        | 1                | 0                 | Hypothetical protein (1)                                                                   | -                                                                                                                                                                                                                                                                                                                                                                                                                                                                                                                              | -                                                                                                                                                                                                                                                  | -                           | C_ushii_00296_mRNA_13.1 | -                    |
| GF0036299 | 0                        | 1                | 0                 | Hypothetical protein (1)                                                                   | -                                                                                                                                                                                                                                                                                                                                                                                                                                                                                                                              | -                                                                                                                                                                                                                                                  | -                           | C_ushii_00295_mRNA_3.1  | -                    |
| GF0036298 | 0                        | 1                | 0                 | Hypothetical protein (1)                                                                   | -                                                                                                                                                                                                                                                                                                                                                                                                                                                                                                                              | -                                                                                                                                                                                                                                                  | -                           | C_ushii_00295_mRNA_21.1 | -                    |
| GF0036297 | 0                        | 1                | 0                 | Hypothetical protein (1)                                                                   | -                                                                                                                                                                                                                                                                                                                                                                                                                                                                                                                              | -                                                                                                                                                                                                                                                  | -                           | C_ushii_00294_mRNA_9.1  | -                    |
| GF0036296 | 0                        | 1                | 0                 | Hypothetical protein (1)                                                                   | -                                                                                                                                                                                                                                                                                                                                                                                                                                                                                                                              | -                                                                                                                                                                                                                                                  | -                           | C_ushii_00294_mRNA_4.1  | -                    |
| GF0036295 | 0                        | 1                | 0                 | Hypothetical protein (1)                                                                   | -                                                                                                                                                                                                                                                                                                                                                                                                                                                                                                                              | Retronasoprotein gag domain [IPR005162] (1)                                                                                                                                                                                                        | -                           | C_ushii_00294_mRNA_3.1  | -                    |

| ID        | Num. in <i>C. crotolariae</i> | Num. in <i>C. canalis</i> | Num. in <i>P. pilifera</i> | Note                                                   | GO                                                                                                                                                                                                                                                                                                                                                                                                                                                  | InterPro                                                                                                                                                                                                                                                                                                                                                                                                                                                                                    | Members in <i>Crotolariae</i> | Members in <i>Canalis</i> | Members in <i>Pilifera</i> |
|-----------|-------------------------------|---------------------------|----------------------------|--------------------------------------------------------|-----------------------------------------------------------------------------------------------------------------------------------------------------------------------------------------------------------------------------------------------------------------------------------------------------------------------------------------------------------------------------------------------------------------------------------------------------|---------------------------------------------------------------------------------------------------------------------------------------------------------------------------------------------------------------------------------------------------------------------------------------------------------------------------------------------------------------------------------------------------------------------------------------------------------------------------------------------|-------------------------------|---------------------------|----------------------------|
| GF0036294 | 0                             | 1                         | 0                          | Hypothetical protein (1)                               | proteolysis [GO:0006958 biological process] (1); cysteine-type peptidase activity [GO:0008234 molecular_function] (1); transcription, DNA-templated [GO:0006351 biological_process] (1); DNA-directed RNA polymerase activity [GO:0003999 molecular_function] (1); DNA binding [GO:0003677 molecular_function] (1); nucleus [GO:0005634 cellular_component] (1)                                                                                     | Transposase-associated domain [IPR028480] (1); Upi1 protease family, C-terminal catalytic domain [IPR003653] (1)                                                                                                                                                                                                                                                                                                                                                                            | C_unihit_00294_mRNA_19.1      | -                         | -                          |
| GF0036293 | 0                             | 1                         | 0                          | DNA-directed RNA polymerase II (1)                     | DNA-directed RNA polymerase activity [GO:0003999 molecular_function] (1); DNA binding [GO:0003677 molecular_function] (1); nucleus [GO:0005634 cellular_component] (1)                                                                                                                                                                                                                                                                              | RNA polymerase, Rpb5, N-terminal [IPR005571] (1); RNA polymerase, subunit II Rpb5 C-terminal [IPR000783] (1)                                                                                                                                                                                                                                                                                                                                                                                | C_unihit_00294_mRNA_17.1      | -                         | -                          |
| GF0036292 | 0                             | 1                         | 0                          | Cytochrome P450 82C4 (1)                               | oxidoreductase activity, acting on paired donors, with incorporation or reduction of molecular oxygen [GO:0016765 molecular_function] (1); oxidation-reduction process [GO:0055114 biological_process] (1); iron ion binding [GO:0005506 molecular_function] (1); heme binding [GO:0020037 molecular_function] (1)                                                                                                                                  | Cytochrome P450 [IPR001128] (1)                                                                                                                                                                                                                                                                                                                                                                                                                                                             | C_unihit_00293_mRNA_18.1      | -                         | -                          |
| GF0036291 | 0                             | 1                         | 0                          | Cytochrome P450 82M4 (1)                               | oxidoreductase activity, acting on paired donors, with incorporation or reduction of molecular oxygen [GO:0016765 molecular_function] (1); oxidation-reduction process [GO:0055114 biological_process] (1); iron ion binding [GO:0005506 molecular_function] (1); heme binding [GO:0020037 molecular_function] (1)                                                                                                                                  | Cytochrome P450, E-class, group I [IPR024411] (1); Cytochrome P450 [IPR001128] (1)                                                                                                                                                                                                                                                                                                                                                                                                          | C_unihit_00293_mRNA_17.1      | -                         | -                          |
| GF0036290 | 0                             | 1                         | 0                          | Hypothetical protein (1)                               |                                                                                                                                                                                                                                                                                                                                                                                                                                                     |                                                                                                                                                                                                                                                                                                                                                                                                                                                                                             |                               | C_unihit_00293_mRNA_15.1  | -                          |
| GF0036289 | 0                             | 1                         | 0                          | 60 kDa chaperonin, chiklophatic (1)                    | ATP binding [GO:0005524 molecular_function] (1)                                                                                                                                                                                                                                                                                                                                                                                                     | GroEL-like apical domain [IPR027409] (1); Chaperonin Cpn60/TCP-1 family [IPR003423] (1); GroEL-like equatorial domain [IPR007513] (1)                                                                                                                                                                                                                                                                                                                                                       | C_unihit_00293_mRNA_11.1      | -                         | -                          |
| GF0036288 | 0                             | 1                         | 0                          | Hypothetical protein (1)                               | zinc ion binding [GO:0008270 molecular_function] (1); nucleic acid binding [GO:0003676 molecular_function] (1)                                                                                                                                                                                                                                                                                                                                      | Zinc finger, CCHC-type [IPR001878] (1)                                                                                                                                                                                                                                                                                                                                                                                                                                                      | C_unihit_00293_mRNA_10.1      | -                         | -                          |
| GF0036287 | 0                             | 1                         | 0                          | Retransposon protein, putative, Ty1 copia subclass (1) |                                                                                                                                                                                                                                                                                                                                                                                                                                                     |                                                                                                                                                                                                                                                                                                                                                                                                                                                                                             |                               | C_unihit_00292_mRNA_32.1  | -                          |
| GF0036286 | 0                             | 1                         | 0                          | Hypothetical protein (1)                               |                                                                                                                                                                                                                                                                                                                                                                                                                                                     |                                                                                                                                                                                                                                                                                                                                                                                                                                                                                             |                               | C_unihit_00292_mRNA_26.1  | -                          |
| GF0036285 | 0                             | 1                         | 0                          | Hypothetical protein (1)                               |                                                                                                                                                                                                                                                                                                                                                                                                                                                     |                                                                                                                                                                                                                                                                                                                                                                                                                                                                                             |                               | C_unihit_00292_mRNA_18.1  | -                          |
| GF0036284 | 0                             | 1                         | 0                          | Hypothetical protein (1)                               | protein binding [GO:0005515 molecular_function] (1); intracellular [GO:0005622 cellular_component] (1); translation [GO:0006412 biological_process] (1); structural constituent of ribosome [GO:0003735 molecular_function] (1); ribosome [GO:0005840 cellular_component] (1)                                                                                                                                                                       | Bromodomain [IPR001487] (1)                                                                                                                                                                                                                                                                                                                                                                                                                                                                 | C_unihit_00291_mRNA_8.1       | -                         | -                          |
| GF0036283 | 0                             | 1                         | 0                          | 60S ribosomal protein L36 (1)                          |                                                                                                                                                                                                                                                                                                                                                                                                                                                     | Ribosomal protein L36 [IPR000599] (1)                                                                                                                                                                                                                                                                                                                                                                                                                                                       | C_unihit_00291_mRNA_3.1       | -                         | -                          |
| GF0036282 | 0                             | 1                         | 0                          | Hypothetical protein (1)                               |                                                                                                                                                                                                                                                                                                                                                                                                                                                     |                                                                                                                                                                                                                                                                                                                                                                                                                                                                                             |                               | C_unihit_00290_mRNA_32.1  | -                          |
| GF0036281 | 0                             | 1                         | 0                          | Hypothetical protein (1)                               |                                                                                                                                                                                                                                                                                                                                                                                                                                                     |                                                                                                                                                                                                                                                                                                                                                                                                                                                                                             |                               | C_unihit_00290_mRNA_31.1  | -                          |
| GF0036280 | 0                             | 1                         | 0                          | Hypothetical protein (1)                               |                                                                                                                                                                                                                                                                                                                                                                                                                                                     |                                                                                                                                                                                                                                                                                                                                                                                                                                                                                             |                               | C_unihit_00290_mRNA_18.1  | -                          |
| GF0036279 | 0                             | 1                         | 0                          | Class III homodomain leucine zipper protein (1)        | DNA binding [GO:0003677 molecular_function] (1); lipid binding [GO:0005289 molecular_function] (1)                                                                                                                                                                                                                                                                                                                                                  | START-like domain [IPR023931] (1); START domain [IPR002913] (1); Homodomain-like [IPR000697] (1); Homobox domain [IPR001356] (1); MEKHLA [IPR013978] (1)                                                                                                                                                                                                                                                                                                                                    | C_unihit_00290_mRNA_16.1      | -                         | -                          |
| GF0036278 | 0                             | 1                         | 0                          | Hypothetical protein (1)                               | ATPase activity [GO:0016887 molecular_function] (1); male enzyme activity [GO:0004470 molecular_function] (1); succinate dehydrogenase [GO:0005524 molecular_function] (1); malate dehydrogenase (decarboxylating) [NAD-activity] [GO:0004471 molecular_function] (1); NAD binding [GO:0005128 molecular_function] (1); oxidation-reduction process [GO:0055114 biological_process] (1); male metabolic process [GO:0006108 biological_process] (1) | Plant PDR ABC transporter associated [IPR013381] (1); Male enzyme, conserved site [IPR015884] (1); Male oxidoreductase [IPR001891] (1); ABC-2 type transporter [IPR033255] (1); ABC transporter-like [IPR003439] (1); Male enzyme, N-terminal domain [IPR012301] (1); Male enzyme, NAD-binding [IPR012302] (1); ABC-transporter extracellular N-terminal domain [IPR028481] (1); P-loop containing nucleoside triphosphate hydrolase [IPR027413] (1); NAD(P)-binding domain [IPR016440] (1) | C_unihit_00290_mRNA_10.1      | -                         | -                          |
| GF0036277 | 0                             | 1                         | 0                          | (1-4)-beta-mannan endohydrolase (1)                    | hydrolase activity, hydrolyzing O-glycosyl compounds [GO:0004453 molecular_function] (1); carbohydrate metabolic process [GO:0006975 biological_process] (1)                                                                                                                                                                                                                                                                                        | Glycoside hydrolase, catalytic domain [IPR013781] (1); Glycoside hydrolase superfamily [IPR017853] (1); Glycoside hydrolase, family 5 [IPR001547] (1)                                                                                                                                                                                                                                                                                                                                       | C_unihit_00289_mRNA_8.1       | -                         | -                          |
| GF0036276 | 0                             | 1                         | 0                          | Hypothetical protein (1)                               |                                                                                                                                                                                                                                                                                                                                                                                                                                                     |                                                                                                                                                                                                                                                                                                                                                                                                                                                                                             |                               | C_unihit_00289_mRNA_7.1   | -                          |
| GF0036275 | 0                             | 1                         | 0                          | Putative random shag protein 5-like (1)                |                                                                                                                                                                                                                                                                                                                                                                                                                                                     | Putative random shag protein 5-like [IPR012511] (1)                                                                                                                                                                                                                                                                                                                                                                                                                                         | C_unihit_00289_mRNA_43.1      | -                         | -                          |
| GF0036274 | 0                             | 1                         | 0                          | Hypothetical protein (1)                               |                                                                                                                                                                                                                                                                                                                                                                                                                                                     | Domain of unknown function DUF59 [IPR007441] (1)                                                                                                                                                                                                                                                                                                                                                                                                                                            | C_unihit_00289_mRNA_42.1      | -                         | -                          |
| GF0036273 | 0                             | 1                         | 0                          | Lacase 11 (1)                                          | copper ion binding [GO:0005507 molecular_function] (1); oxidoreductase activity [GO:0004499 molecular_function] (1); oxidation-reduction process [GO:0055114 biological_process] (1)                                                                                                                                                                                                                                                                | Multicopper oxidases, conserved site [IPR031318] (1); Multicopper oxidase, type 2 [IPR011766] (1); Cuprodoxin [IPR009712] (1); Multicopper oxidase, copper-binding site [IPR002355] (1)                                                                                                                                                                                                                                                                                                     | C_unihit_00289_mRNA_21.1      | -                         | -                          |
| GF0036272 | 0                             | 1                         | 0                          | Hypothetical protein (1)                               | protein binding [GO:0005515 molecular_function] (1); zinc ion binding [GO:0008270 molecular_function] (1)                                                                                                                                                                                                                                                                                                                                           | DYW domain [IPR028671] (1); Pentapeptide repeat [IPR002885] (1); Tetrapeptide-like helical domain [IPR011990] (1)                                                                                                                                                                                                                                                                                                                                                                           | C_unihit_00289_mRNA_19.1      | -                         | -                          |
| GF0036271 | 0                             | 1                         | 0                          | Hypothetical protein (1)                               |                                                                                                                                                                                                                                                                                                                                                                                                                                                     |                                                                                                                                                                                                                                                                                                                                                                                                                                                                                             |                               | C_unihit_00289_mRNA_12.1  | -                          |
| GF0036270 | 0                             | 1                         | 0                          | Hypothetical protein (1)                               |                                                                                                                                                                                                                                                                                                                                                                                                                                                     | Uncharacterised protein family UPR0261 [IPR008322] (1)                                                                                                                                                                                                                                                                                                                                                                                                                                      | C_unihit_00289_mRNA_1.1       | -                         | -                          |
| GF0036269 | 0                             | 1                         | 0                          | Hypothetical protein (1)                               | actin binding [GO:0008779 biological_process] (1)                                                                                                                                                                                                                                                                                                                                                                                                   | Protein-Nucleoside (NET), actin-binding (NAB) domain [IPR011684] (1)                                                                                                                                                                                                                                                                                                                                                                                                                        | C_unihit_00288_mRNA_39.1      | -                         | -                          |
| GF0036268 | 0                             | 1                         | 0                          | Kinase interacting (KIP1)-like family protein (1)      |                                                                                                                                                                                                                                                                                                                                                                                                                                                     |                                                                                                                                                                                                                                                                                                                                                                                                                                                                                             |                               | C_unihit_00288_mRNA_38.1  | -                          |
| GF0036267 | 0                             | 1                         | 0                          | Hypothetical protein (1)                               |                                                                                                                                                                                                                                                                                                                                                                                                                                                     |                                                                                                                                                                                                                                                                                                                                                                                                                                                                                             |                               | C_unihit_00288_mRNA_37.1  | -                          |
| GF0036266 | 0                             | 1                         | 0                          | Hypothetical protein (1)                               |                                                                                                                                                                                                                                                                                                                                                                                                                                                     |                                                                                                                                                                                                                                                                                                                                                                                                                                                                                             |                               | C_unihit_00288_mRNA_24.1  | -                          |
| GF0036265 | 0                             | 1                         | 0                          | Threonine endopeptidase (1)                            |                                                                                                                                                                                                                                                                                                                                                                                                                                                     | Cyanobacterial aminocyl-rRNA epimerase, CAAD domain [IPR025664] (1)                                                                                                                                                                                                                                                                                                                                                                                                                         | C_unihit_00288_mRNA_17.1      | -                         | -                          |
| GF0036264 | 0                             | 1                         | 0                          | Hypothetical protein (1)                               |                                                                                                                                                                                                                                                                                                                                                                                                                                                     |                                                                                                                                                                                                                                                                                                                                                                                                                                                                                             |                               | C_unihit_00288_mRNA_15.1  | -                          |
| GF0036263 | 0                             | 1                         | 0                          | Hypothetical protein (1)                               |                                                                                                                                                                                                                                                                                                                                                                                                                                                     |                                                                                                                                                                                                                                                                                                                                                                                                                                                                                             |                               | C_unihit_00288_mRNA_11.1  | -                          |
| GF0036262 | 0                             | 1                         | 0                          | Hypothetical protein (1)                               |                                                                                                                                                                                                                                                                                                                                                                                                                                                     |                                                                                                                                                                                                                                                                                                                                                                                                                                                                                             |                               | C_unihit_00287_mRNA_6.1   | -                          |
| GF0036261 | 0                             | 1                         | 0                          | Hypothetical protein (1)                               | pectinesterase activity [GO:0003099 molecular_function] (1); cell wall [GO:0005198 cellular_component] (1); cell wall modification [GO:0042545 biological_process] (1)                                                                                                                                                                                                                                                                              | Pectin lyase fold/virulence factor [IPR011050] (1); Pectin lyase fold [IPR012334] (1); Pectinesterase, catalytic [IPR006070] (1)                                                                                                                                                                                                                                                                                                                                                            | C_unihit_00287_mRNA_22.1      | -                         | -                          |
| GF0036260 | 0                             | 1                         | 0                          | Hypothetical protein (1)                               |                                                                                                                                                                                                                                                                                                                                                                                                                                                     |                                                                                                                                                                                                                                                                                                                                                                                                                                                                                             |                               | C_unihit_00287_mRNA_2.1   | -                          |
| GF0036259 | 0                             | 1                         | 0                          | Hypothetical protein (1)                               |                                                                                                                                                                                                                                                                                                                                                                                                                                                     |                                                                                                                                                                                                                                                                                                                                                                                                                                                                                             |                               | C_unihit_00287_mRNA_16.1  | -                          |
| GF0036258 | 0                             | 1                         | 0                          | Hypothetical protein (1)                               |                                                                                                                                                                                                                                                                                                                                                                                                                                                     |                                                                                                                                                                                                                                                                                                                                                                                                                                                                                             |                               | C_unihit_00287_mRNA_11.1  | -                          |
| GF0036257 | 0                             | 1                         | 0                          | Hypothetical protein (1)                               |                                                                                                                                                                                                                                                                                                                                                                                                                                                     |                                                                                                                                                                                                                                                                                                                                                                                                                                                                                             |                               | C_unihit_00287_mRNA_1.1   | -                          |
| GF0036256 | 0                             | 1                         | 0                          | 60S ribosomal protein L9 (1)                           | ribosome [GO:0005840 cellular_component] (1); rRNA binding [GO:0019843 molecular_function] (1); structural constituent of ribosome [GO:0003735 molecular_function] (1); translation [GO:0006412 biological_process] (1)                                                                                                                                                                                                                             | Ribosomal protein L6, alpha-beta domain [IPR020400] (1); Ribosomal protein L6 [IPR000702] (1)                                                                                                                                                                                                                                                                                                                                                                                               | C_unihit_00286_mRNA_31.1      | -                         | -                          |
| GF0036255 | 0                             | 1                         | 0                          | Hypothetical protein (1)                               |                                                                                                                                                                                                                                                                                                                                                                                                                                                     |                                                                                                                                                                                                                                                                                                                                                                                                                                                                                             |                               | C_unihit_00286_mRNA_30.1  | -                          |
| GF0036254 | 0                             | 1                         | 0                          | Hypothetical protein (1)                               |                                                                                                                                                                                                                                                                                                                                                                                                                                                     |                                                                                                                                                                                                                                                                                                                                                                                                                                                                                             |                               | C_unihit_00286_mRNA_3.1   | -                          |
| GF0036253 | 0                             | 1                         | 0                          | Hypothetical protein (1)                               |                                                                                                                                                                                                                                                                                                                                                                                                                                                     |                                                                                                                                                                                                                                                                                                                                                                                                                                                                                             |                               | C_unihit_00286_mRNA_2.1   | -                          |
| GF0036252 | 0                             | 1                         | 0                          | Putative disease resistance protein RGA1 (1)           | ADP binding [GO:0004351 molecular_function] (1)                                                                                                                                                                                                                                                                                                                                                                                                     | Leucine-rich repeat domain, I domain-like [IPR023575] (1); NLR-ARC [IPR02182] (1); P-loop containing nucleoside triphosphate hydrolase [IPR027413] (1)                                                                                                                                                                                                                                                                                                                                      | C_unihit_00286_mRNA_14.1      | -                         | -                          |
| GF0036251 | 0                             | 1                         | 0                          | Hypothetical protein (1)                               | DNA binding [GO:0003677 molecular_function] (1); regulation of transcription, DNA-templated [GO:0006355 biological_process] (1)                                                                                                                                                                                                                                                                                                                     | NAC domain [IPR003441] (1)                                                                                                                                                                                                                                                                                                                                                                                                                                                                  | C_unihit_00286_mRNA_12.1      | -                         | -                          |
| GF0036250 | 0                             | 1                         | 0                          | NAC protein 3 (1)                                      |                                                                                                                                                                                                                                                                                                                                                                                                                                                     |                                                                                                                                                                                                                                                                                                                                                                                                                                                                                             |                               | C_unihit_00286_mRNA_11.1  | -                          |
| GF0036249 | 0                             | 1                         | 0                          | Suppressor of rpt-1, constitutive 1-like protein (1)   |                                                                                                                                                                                                                                                                                                                                                                                                                                                     | Leucine-rich repeat domain, I domain-like [IPR02675] (1)                                                                                                                                                                                                                                                                                                                                                                                                                                    | C_unihit_00286_mRNA_1.1       | -                         | -                          |
| GF0036248 | 0                             | 1                         | 0                          | Hypothetical protein (1)                               | nucleic acid binding [GO:0003676 molecular_function] (1)                                                                                                                                                                                                                                                                                                                                                                                            | Ribonuclease H-like domain [IPR012337] (1); G4pG-pyrimidine domain [IPR025724] (1)                                                                                                                                                                                                                                                                                                                                                                                                          | C_unihit_00285_mRNA_9.1       | -                         | -                          |
| GF0036247 | 0                             | 1                         | 0                          | Hypothetical protein (1)                               |                                                                                                                                                                                                                                                                                                                                                                                                                                                     |                                                                                                                                                                                                                                                                                                                                                                                                                                                                                             |                               | C_unihit_00285_mRNA_7.1   | -                          |
| GF0036246 | 0                             | 1                         | 0                          | Hypothetical protein (1)                               |                                                                                                                                                                                                                                                                                                                                                                                                                                                     |                                                                                                                                                                                                                                                                                                                                                                                                                                                                                             |                               | C_unihit_00285_mRNA_34.1  | -                          |
| GF0036245 | 0                             | 1                         | 0                          | Monoarthric transport protein (1)                      |                                                                                                                                                                                                                                                                                                                                                                                                                                                     |                                                                                                                                                                                                                                                                                                                                                                                                                                                                                             |                               | C_unihit_00285_mRNA_31.1  | -                          |
| GF0036244 | 0                             | 1                         | 0                          | Hypothetical protein (1)                               |                                                                                                                                                                                                                                                                                                                                                                                                                                                     |                                                                                                                                                                                                                                                                                                                                                                                                                                                                                             |                               | C_unihit_00285_mRNA_30.1  | -                          |
| GF0036243 | 0                             | 1                         | 0                          | Hypothetical protein (1)                               |                                                                                                                                                                                                                                                                                                                                                                                                                                                     |                                                                                                                                                                                                                                                                                                                                                                                                                                                                                             |                               | C_unihit_00285_mRNA_28.1  | -                          |
| GF0036242 | 0                             | 1                         | 0                          | Polygalacturonase, family GH28 (1)                     | polygalacturonase activity [GO:0004650 molecular_function] (1); carbohydrate metabolic process [GO:0006975 biological_process] (1)                                                                                                                                                                                                                                                                                                                  | Glycoside hydrolase, family 28 [IPR000743] (1); Pectin lyase fold/virulence factor [IPR011050] (1); Pectin lyase fold [IPR012334] (1)                                                                                                                                                                                                                                                                                                                                                       | C_unihit_00285_mRNA_26.1      | -                         | -                          |
| GF0036241 | 0                             | 1                         | 0                          | Hypothetical protein (1)                               |                                                                                                                                                                                                                                                                                                                                                                                                                                                     |                                                                                                                                                                                                                                                                                                                                                                                                                                                                                             |                               | C_unihit_00285_mRNA_21.1  | -                          |
| GF0036240 | 0                             | 1                         | 0                          | Hypothetical protein (1)                               |                                                                                                                                                                                                                                                                                                                                                                                                                                                     |                                                                                                                                                                                                                                                                                                                                                                                                                                                                                             |                               | C_unihit_00285_mRNA_2.1   | -                          |
| GF0036239 | 0                             | 1                         | 0                          | Hypothetical protein (1)                               |                                                                                                                                                                                                                                                                                                                                                                                                                                                     |                                                                                                                                                                                                                                                                                                                                                                                                                                                                                             |                               | C_unihit_00285_mRNA_19.1  | -                          |
| GF0036238 | 0                             | 1                         | 0                          | MuDR family transposase (1)                            |                                                                                                                                                                                                                                                                                                                                                                                                                                                     | MULE transposase domain [IPR018289] (1); Transposase, MuDR, plant [IPR004312] (1)                                                                                                                                                                                                                                                                                                                                                                                                           | C_unihit_00285_mRNA_18.1      | -                         | -                          |
| GF0036237 | 0                             | 1                         | 0                          | Hypothetical protein (1)                               |                                                                                                                                                                                                                                                                                                                                                                                                                                                     |                                                                                                                                                                                                                                                                                                                                                                                                                                                                                             |                               | C_unihit_00285_mRNA_16.1  | -                          |
| GF0036236 | 0                             | 1                         | 0                          | Hypothetical protein (1)                               | protein binding [GO:0005515 molecular_function] (1)                                                                                                                                                                                                                                                                                                                                                                                                 | Tetrapeptide-like helical domain [IPR011990] (1); Pentapeptide repeat [IPR002885] (1)                                                                                                                                                                                                                                                                                                                                                                                                       | C_unihit_00285_mRNA_15.1      | -                         | -                          |
| GF0036235 | 0                             | 1                         | 0                          | Hypothetical protein (1)                               |                                                                                                                                                                                                                                                                                                                                                                                                                                                     |                                                                                                                                                                                                                                                                                                                                                                                                                                                                                             |                               | C_unihit_00285_mRNA_13.1  | -                          |
| GF0036234 | 0                             | 1                         | 0                          | Hypothetical protein (1)                               | zinc ion binding [GO:0008270 molecular_function] (1); nucleic acid binding [GO:0003676 molecular_function] (1)                                                                                                                                                                                                                                                                                                                                      | Zinc finger, CCHC-type [IPR001878] (1)                                                                                                                                                                                                                                                                                                                                                                                                                                                      | C_unihit_00285_mRNA_12.1      | -                         | -                          |
| GF0036233 | 0                             | 1                         | 0                          | Hypothetical protein (1)                               |                                                                                                                                                                                                                                                                                                                                                                                                                                                     | Retransposon gag domain [IPR005162] (1)                                                                                                                                                                                                                                                                                                                                                                                                                                                     | C_unihit_00285_mRNA_1.1       | -                         | -                          |

| ID        | Num. in C. crottenstei | Num. in C. auris | Num. in P. putida | Note                                                         | GO                                                                                                                                                                                                                                                                                                                                                                        | InterPro                                                                                                                                                                                                                                                                              | Members in C. crottenstei | Members in C. auris     | Members in P. putida |
|-----------|------------------------|------------------|-------------------|--------------------------------------------------------------|---------------------------------------------------------------------------------------------------------------------------------------------------------------------------------------------------------------------------------------------------------------------------------------------------------------------------------------------------------------------------|---------------------------------------------------------------------------------------------------------------------------------------------------------------------------------------------------------------------------------------------------------------------------------------|---------------------------|-------------------------|----------------------|
| GF0036232 | 0                      | 1                | 0                 | Hypothetical protein (1)                                     |                                                                                                                                                                                                                                                                                                                                                                           |                                                                                                                                                                                                                                                                                       |                           | C_uni96_00284_mRNA_9.1  | -                    |
| GF0036231 | 0                      | 1                | 0                 | Hypothetical protein (1)                                     |                                                                                                                                                                                                                                                                                                                                                                           |                                                                                                                                                                                                                                                                                       |                           | C_uni96_00284_mRNA_8.1  | -                    |
| GF0036230 | 0                      | 1                | 0                 | Hypothetical protein (1)                                     |                                                                                                                                                                                                                                                                                                                                                                           |                                                                                                                                                                                                                                                                                       |                           | C_uni96_00284_mRNA_7.1  | -                    |
| GF0036229 | 0                      | 1                | 0                 | Flavonoid 3',5'-hydroxylase (1)                              | iron ion binding [GO:0005506 molecular_function] (1); heme binding [GO:0020377 molecular_function] (1); oxidation-reduction process [GO:005511 biological_process] (1); oxidoreductase activity, acting on paired donors, with incorporation or reduction of molecular oxygen [GO:0016765 molecular_function] (1)                                                         | Cytochrome P450, E-class, group I [IPRO0240] (1); Cytochrome P450, conserved site [IPRO17972] (1); Cytochrome P450 [IPRO01128] (1)                                                                                                                                                    | C_uni96_00284_mRNA_5.1    | -                       | -                    |
| GF0036228 | 0                      | 1                | 0                 | Flavonoid 3-monooxygenase (1)                                | iron ion binding [GO:0005506 molecular_function] (1); heme binding [GO:0020377 molecular_function] (1); oxidoreductase activity, acting on paired donors, with incorporation or reduction of molecular oxygen [GO:0016765 molecular_function] (1); oxidation-reduction process [GO:0055114 biological_process] (1)                                                        | Cytochrome P450 [IPRO01128] (1); Cytochrome P450, E-class, group I [IPRO0240] (1)                                                                                                                                                                                                     |                           | C_uni96_00284_mRNA_4.1  | -                    |
| GF0036227 | 0                      | 1                | 0                 | Hypothetical protein (1)                                     | nucleic acid binding [GO:0003676 molecular_function] (1); integral component of membrane [GO:0016021 cellular_component] (1); prenyltransferase activity [GO:0006059 molecular_function] (1)                                                                                                                                                                              | UbaA prenyltransferase family [IPRO05571] (1); Ribonuclease H-like domain [IPRO12337] (1)                                                                                                                                                                                             |                           | C_uni96_00284_mRNA_3.1  | -                    |
| GF0036226 | 0                      | 1                | 0                 | Hypothetical protein (1)                                     |                                                                                                                                                                                                                                                                                                                                                                           |                                                                                                                                                                                                                                                                                       |                           | C_uni96_00284_mRNA_25.1 | -                    |
| GF0036225 | 0                      | 1                | 0                 | Integrase core domain containing protein, putative (1)       |                                                                                                                                                                                                                                                                                                                                                                           |                                                                                                                                                                                                                                                                                       |                           | C_uni96_00284_mRNA_1.1  | -                    |
| GF0036224 | 0                      | 1                | 0                 | Hypothetical protein (1)                                     |                                                                                                                                                                                                                                                                                                                                                                           |                                                                                                                                                                                                                                                                                       |                           | C_uni96_00283_mRNA_14.1 | -                    |
| GF0036223 | 0                      | 1                | 0                 | Hypothetical protein (1)                                     |                                                                                                                                                                                                                                                                                                                                                                           |                                                                                                                                                                                                                                                                                       |                           | C_uni96_00283_mRNA_12.1 | -                    |
| GF0036222 | 0                      | 1                | 0                 | Hypothetical protein (1)                                     |                                                                                                                                                                                                                                                                                                                                                                           |                                                                                                                                                                                                                                                                                       |                           | C_uni96_00282_mRNA_24.1 | -                    |
| GF0036221 | 0                      | 1                | 0                 | Pectate lyase (1)                                            |                                                                                                                                                                                                                                                                                                                                                                           | AmbAllergen [IPRO18082] (1); Pectin lyase fold [IPRO12334] (1); Pectate lyase; Amb allergen [IPRO02022] (1); Pectin lyase fold; nuclease factor [IPRO11050] (1)                                                                                                                       |                           | C_uni96_00282_mRNA_23.1 | -                    |
| GF0036220 | 0                      | 1                | 0                 | F-box and Leucine Rich Repeat domains containing protein (1) | protein binding [GO:0005515 molecular_function] (1)                                                                                                                                                                                                                                                                                                                       | Leucine-rich repeat domain, L domain-like [IPRO2575] (1); F-box domain [IPRO01810] (1)                                                                                                                                                                                                |                           | C_uni96_00282_mRNA_22.1 | -                    |
| GF0036219 | 0                      | 1                | 0                 | Hypothetical protein (1)                                     | nucleic acid binding [GO:0003676 molecular_function] (1); zinc ion binding [GO:0008270 molecular_function] (1)                                                                                                                                                                                                                                                            | Zinc finger, CCHC-type [IPRO01878] (1)                                                                                                                                                                                                                                                |                           | C_uni96_00282_mRNA_21.1 | -                    |
| GF0036218 | 0                      | 1                | 0                 | Hypothetical protein (1)                                     |                                                                                                                                                                                                                                                                                                                                                                           |                                                                                                                                                                                                                                                                                       |                           | C_uni96_00282_mRNA_14.1 | -                    |
| GF0036217 | 0                      | 1                | 0                 | Hypothetical protein (1)                                     |                                                                                                                                                                                                                                                                                                                                                                           |                                                                                                                                                                                                                                                                                       |                           | C_uni96_00282_mRNA_1.1  | -                    |
| GF0036216 | 0                      | 1                | 0                 | Hypothetical protein (1)                                     |                                                                                                                                                                                                                                                                                                                                                                           |                                                                                                                                                                                                                                                                                       |                           | C_uni96_00281_mRNA_8.1  | -                    |
| GF0036215 | 0                      | 1                | 0                 | Hypothetical protein (1)                                     |                                                                                                                                                                                                                                                                                                                                                                           |                                                                                                                                                                                                                                                                                       |                           | C_uni96_00281_mRNA_42.1 | -                    |
| GF0036214 | 0                      | 1                | 0                 | Hypothetical protein (1)                                     | carbohydrate binding [GO:0030246 molecular_function] (1)                                                                                                                                                                                                                                                                                                                  | Legume lectin domain [IPRO01220] (1); Concavallinin A-like lectin; glycosamine domain [IPRO13320] (1)                                                                                                                                                                                 |                           | C_uni96_00281_mRNA_40.1 | -                    |
| GF0036213 | 0                      | 1                | 0                 | Hypothetical protein (1)                                     |                                                                                                                                                                                                                                                                                                                                                                           |                                                                                                                                                                                                                                                                                       |                           | C_uni96_00281_mRNA_23.1 | -                    |
| GF0036212 | 0                      | 1                | 0                 | Putative transcription factor XI (1)                         | gene silencing by RNA [GO:0031047 biological_process] (1)                                                                                                                                                                                                                                                                                                                 | Uncharacterised domain XI [IPRO05379] (1); NS domain [IPRO05380] (1)                                                                                                                                                                                                                  |                           | C_uni96_00281_mRNA_11.1 | -                    |
| GF0036211 | 0                      | 1                | 0                 | Hypothetical protein (1)                                     |                                                                                                                                                                                                                                                                                                                                                                           |                                                                                                                                                                                                                                                                                       |                           | C_uni96_00280_mRNA_8.1  | -                    |
| GF0036210 | 0                      | 1                | 0                 | Cytoskin riboside 5'-monophosphate phosphoribohydrolase (1)  |                                                                                                                                                                                                                                                                                                                                                                           | Cytoskin riboside 5'-monophosphate phosphoribohydrolase LOG [IPRO05269] (1); LOG family [IPRO03100] (1)                                                                                                                                                                               |                           | C_uni96_00280_mRNA_7.1  | -                    |
| GF0036209 | 0                      | 1                | 0                 | Hypothetical protein (1)                                     |                                                                                                                                                                                                                                                                                                                                                                           |                                                                                                                                                                                                                                                                                       |                           | C_uni96_00280_mRNA_5.1  | -                    |
| GF0036208 | 0                      | 1                | 0                 | Hypothetical protein (1)                                     |                                                                                                                                                                                                                                                                                                                                                                           |                                                                                                                                                                                                                                                                                       |                           | C_uni96_00280_mRNA_4.1  | -                    |
| GF0036207 | 0                      | 1                | 0                 | Hypothetical protein (1)                                     |                                                                                                                                                                                                                                                                                                                                                                           |                                                                                                                                                                                                                                                                                       |                           | C_uni96_00280_mRNA_36.1 | -                    |
| GF0036206 | 0                      | 1                | 0                 | Hypothetical protein (1)                                     |                                                                                                                                                                                                                                                                                                                                                                           |                                                                                                                                                                                                                                                                                       |                           | C_uni96_00280_mRNA_3.1  | -                    |
| GF0036205 | 0                      | 1                | 0                 | Hypothetical protein (1)                                     | cysteine-type peptidase activity [GO:0005234 molecular_function] (1); proteolysis [GO:0006508 biological_process] (1)                                                                                                                                                                                                                                                     | Ulp1 protease family, C-terminal catalytic domain [IPRO03653] (1)                                                                                                                                                                                                                     |                           | C_uni96_00280_mRNA_29.1 | -                    |
| GF0036204 | 0                      | 1                | 0                 | Hypothetical protein (1)                                     |                                                                                                                                                                                                                                                                                                                                                                           |                                                                                                                                                                                                                                                                                       |                           | C_uni96_00280_mRNA_15.1 | -                    |
| GF0036203 | 0                      | 1                | 0                 | Hypothetical protein (1)                                     |                                                                                                                                                                                                                                                                                                                                                                           |                                                                                                                                                                                                                                                                                       |                           | C_uni96_00280_mRNA_13.1 | -                    |
| GF0036202 | 0                      | 1                | 0                 | Hypothetical protein (1)                                     |                                                                                                                                                                                                                                                                                                                                                                           |                                                                                                                                                                                                                                                                                       |                           | C_uni96_00280_mRNA_11.1 | -                    |
| GF0036201 | 0                      | 1                | 0                 | Hypothetical protein (1)                                     |                                                                                                                                                                                                                                                                                                                                                                           | Transposase-associated domain [IPRO28480] (1)                                                                                                                                                                                                                                         |                           | C_uni96_00280_mRNA_1.1  | -                    |
| GF0036200 | 0                      | 1                | 0                 | Hypothetical protein (1)                                     | nucleic acid binding [GO:0003676 molecular_function] (1)                                                                                                                                                                                                                                                                                                                  | Ribonuclease H-like domain [IPRO12337] (1)                                                                                                                                                                                                                                            |                           | C_uni96_00279_mRNA_7.1  | -                    |
| GF0036199 | 0                      | 1                | 0                 | Hypothetical protein (1)                                     |                                                                                                                                                                                                                                                                                                                                                                           |                                                                                                                                                                                                                                                                                       |                           | C_uni96_00279_mRNA_3.1  | -                    |
| GF0036198 | 0                      | 1                | 0                 | Hypothetical protein (1)                                     |                                                                                                                                                                                                                                                                                                                                                                           |                                                                                                                                                                                                                                                                                       |                           | C_uni96_00279_mRNA_22.1 | -                    |
| GF0036197 | 0                      | 1                | 0                 | Hypothetical protein (1)                                     | acetyl-CoA carboxylase activity [GO:0003989 molecular_function] (1); acetyl-CoA carboxylase complex [GO:0009317 cellular_component] (1); fatty acid biosynthetic process [GO:0006633 biological_process] (1)                                                                                                                                                              | Carboxyl transferase [IPRO00022] (1); Acetyl-coenzyme A carboxyltransferase, N-terminal [IPRO11762] (1); Acetyl-CoA carboxylase carboxyl transferase, beta subunit [IPRO00438] (1); CtpB/crotomase-like domain [IPRO29645] (1)                                                        |                           | C_uni96_00279_mRNA_2.1  | -                    |
| GF0036196 | 0                      | 1                | 0                 | Extended synaptotagmin-1 (1)                                 | protein binding [GO:0005515 molecular_function] (1)                                                                                                                                                                                                                                                                                                                       | C2 domain [IPRO00008] (1)                                                                                                                                                                                                                                                             |                           | C_uni96_00279_mRNA_14.1 | -                    |
| GF0036195 | 0                      | 1                | 0                 | Extended synaptotagmin-2A (1)                                | lipid binding [GO:0008289 molecular_function] (1)                                                                                                                                                                                                                                                                                                                         | Synaptotagmin-like mitochondrial lipid-binding domain [IPRO11468] (1)                                                                                                                                                                                                                 |                           | C_uni96_00279_mRNA_13.1 | -                    |
| GF0036194 | 0                      | 1                | 0                 | Hypothetical protein (1)                                     |                                                                                                                                                                                                                                                                                                                                                                           |                                                                                                                                                                                                                                                                                       |                           | C_uni96_00279_mRNA_1.1  | -                    |
| GF0036193 | 0                      | 1                | 0                 | Hypothetical protein (1)                                     |                                                                                                                                                                                                                                                                                                                                                                           |                                                                                                                                                                                                                                                                                       |                           | C_uni96_00278_mRNA_4.1  | -                    |
| GF0036192 | 0                      | 1                | 0                 | Hypothetical protein (1)                                     | proteolysis [GO:0006508 biological_process] (1); zinc ion binding [GO:0008270 molecular_function] (1); metallocarboxypeptidase activity [GO:0004131 molecular_function] (1)                                                                                                                                                                                               | Peptidase M14, carboxypeptidase A [IPRO06834] (1)                                                                                                                                                                                                                                     |                           | C_uni96_00278_mRNA_39.1 | -                    |
| GF0036191 | 0                      | 1                | 0                 | Protein GIGANTEA (1)                                         | regulation of photoperiodism, flowering [GO:200028 biological_process] (1)                                                                                                                                                                                                                                                                                                | GIGANTEA [IPRO26211] (1)                                                                                                                                                                                                                                                              |                           | C_uni96_00278_mRNA_37.1 | -                    |
| GF0036190 | 0                      | 1                | 0                 | Cell division protein kinase, putative (1)                   | ATP binding [GO:0005524 molecular_function] (1); protein phosphorylation [GO:0006468 biological_process] (1); protein kinase activity [GO:0006712 molecular_function] (1)                                                                                                                                                                                                 | Protein kinase domain [IPRO00719] (1); Protein kinase-like domain [IPRO11099] (1); Serine/threonine-protein kinase, active site [IPRO08271] (1); Protein kinase, ATP binding site [IPRO17441] (1); Serine/threonine/dual specificity protein kinase, catalytic domain [IPRO02290] (1) |                           | C_uni96_00278_mRNA_32.1 | -                    |
| GF0036189 | 0                      | 1                | 0                 | Hypothetical protein (1)                                     |                                                                                                                                                                                                                                                                                                                                                                           |                                                                                                                                                                                                                                                                                       |                           | C_uni96_00278_mRNA_31.1 | -                    |
| GF0036188 | 0                      | 1                | 0                 | Hypothetical protein (1)                                     |                                                                                                                                                                                                                                                                                                                                                                           | MULE transposase domain [IPRO18289] (1)                                                                                                                                                                                                                                               |                           | C_uni96_00278_mRNA_2.1  | -                    |
| GF0036187 | 0                      | 1                | 0                 | Hypothetical protein (1)                                     |                                                                                                                                                                                                                                                                                                                                                                           |                                                                                                                                                                                                                                                                                       |                           | C_uni96_00278_mRNA_15.1 | -                    |
| GF0036186 | 0                      | 1                | 0                 | Secoisoprenoid synthase (1)                                  | magnesium ion binding [GO:0000287 molecular_function] (1); lyase activity [GO:0016829 molecular_function] (1); terpenoid synthase activity [GO:0010333 molecular_function] (1); metabolic process [GO:0008152 biological_process] (1)                                                                                                                                     | Terpenoid cyclase/protein prenyltransferase alpha-alpha toroid [IPRO08930] (1); Terpene synthase, N-terminal domain [IPRO01986] (1); Terpene synthase, metal-binding domain process [GO:0008152 biological_process] (1); isoprenoid synthase domain [IPRO08949] (1)                   |                           | C_uni96_00278_mRNA_13.1 | -                    |
| GF0036185 | 0                      | 1                | 0                 | Hypothetical protein (1)                                     | lyase activity [GO:0016829 molecular_function] (1); terpenoid synthase activity [GO:0010333 molecular_function] (1); metabolic process [GO:0008152 biological_process] (1)                                                                                                                                                                                                | Terpene synthase, N-terminal domain [IPRO01986] (1); Terpenoid cyclase/protein prenyltransferase alpha-alpha toroid [IPRO08930] (1)                                                                                                                                                   |                           | C_uni96_00278_mRNA_12.1 | -                    |
| GF0036184 | 0                      | 1                | 0                 | Hypothetical protein (1)                                     |                                                                                                                                                                                                                                                                                                                                                                           |                                                                                                                                                                                                                                                                                       |                           | C_uni96_00278_mRNA_1.1  | -                    |
| GF0036183 | 0                      | 1                | 0                 | Hypothetical protein (1)                                     | integral component of membrane [GO:0016021 cellular_component] (1); cellular response to salicylic acid stimulus [GO:0071446 biological_process] (1); protein binding [GO:0005515 molecular_function] (1); regulation of defense response [GO:0031347 biological_process] (1); regulation of salicylic acid mediated signaling pathway [GO:200031 biological_process] (1) | Protein accelerated cell death 6 [IPRO23464] (1); Ankyrin repeat-containing domain [IPRO20831] (1); Ankyrin repeat [IPRO02110] (1)                                                                                                                                                    |                           | C_uni96_00277_mRNA_4.1  | -                    |
| GF0036182 | 0                      | 1                | 0                 | Hypothetical protein (1)                                     |                                                                                                                                                                                                                                                                                                                                                                           |                                                                                                                                                                                                                                                                                       |                           | C_uni96_00277_mRNA_24.1 | -                    |
| GF0036181 | 0                      | 1                | 0                 | Hypothetical protein (1)                                     | DNA replication [GO:0006260 biological_process] (1); origin recognition complex [GO:0008008 cellular_component] (1); nucleus [GO:0005634 cellular_component] (1)                                                                                                                                                                                                          | Origin recognition complex, subunit 2 [IPRO07200] (1)                                                                                                                                                                                                                                 |                           | C_uni96_00277_mRNA_21.1 | -                    |
| GF0036180 | 0                      | 1                | 0                 | Hypothetical protein (1)                                     |                                                                                                                                                                                                                                                                                                                                                                           |                                                                                                                                                                                                                                                                                       |                           | C_uni96_00277_mRNA_20.1 | -                    |
| GF0036179 | 0                      | 1                | 0                 | Hypothetical protein (1)                                     | cysteine-type peptidase activity [GO:0005234 molecular_function] (1); proteolysis [GO:0006508 biological_process] (1)                                                                                                                                                                                                                                                     | Ulp1 protease family, C-terminal catalytic domain [IPRO03653] (1); EF-hand domain pair [IPRO11992] (1); Domain of unknown function DUF1985 [IPRO15410] (1)                                                                                                                            |                           | C_uni96_00277_mRNA_2.1  | -                    |
| GF0036178 | 0                      | 1                | 0                 | Putative mDR family transposase-like (1)                     | zinc ion binding [GO:0008270 molecular_function] (1)                                                                                                                                                                                                                                                                                                                      | MULE transposase domain [IPRO18289] (1); Zinc finger, PAZ-type [IPRO06564] (1); Zinc finger, SWW-type [IPRO007527] (1)                                                                                                                                                                |                           | C_uni96_00277_mRNA_19.1 | -                    |
| GF0036177 | 0                      | 1                | 0                 | Calcium-dependent protein kinase 21 isoform 3 (1)            | ATP binding [GO:0005524 molecular_function] (1); protein kinase activity [GO:0006712 molecular_function] (1); protein phosphorylation [GO:0006468 biological_process] (1)                                                                                                                                                                                                 | Protein kinase domain [IPRO00719] (1); Protein kinase-like domain [IPRO11099] (1); Serine/threonine/dual specificity protein kinase, catalytic domain [IPRO02290] (1); Protein kinase, ATP binding site [IPRO17441] (1); Serine/threonine-protein kinase, active site [IPRO08271] (1) |                           | C_uni96_00277_mRNA_13.1 | -                    |
| GF0036176 | 0                      | 1                | 0                 | Hypothetical protein (1)                                     | nucleosome [GO:0000786 cellular_component] (1); protein heterodimerization activity [GO:0046892 molecular_function] (1); DNA binding [GO:000377 molecular_function] (1); chromosome, centromeric region [GO:0000775 cellular_component] (1); meiotic chromosome segregation [GO:0045132 biological_process] (1); nucleus [GO:0005634 cellular_component] (1)              | Histone H2B [IPRO00558] (1); Histone-fold [IPRO00972] (1)                                                                                                                                                                                                                             |                           | C_uni96_00275_mRNA_8.1  | -                    |
| GF0036175 | 0                      | 1                | 0                 | Shugoshin protein (1)                                        |                                                                                                                                                                                                                                                                                                                                                                           | Shugoshin, C-terminal [IPRO11515] (1)                                                                                                                                                                                                                                                 |                           | C_uni96_00275_mRNA_37.1 | -                    |

| ID       | Num. in C. crottensteini | Num. in C. auris | Num. in P. putida | Note                                                      | GO                                                                                                                                                                                                                                                                                                                                                                                                                                                                                                                                                                                                                                                                                                                                                                                                                                                                      | InterPro                                                                                                                                                                                                                                                                                                                                                                                                                                                                                                                                                                                                                                                                                                                                                                 | Members in C. crottensteini | Members in C. auris     | Members in P. putida |
|----------|--------------------------|------------------|-------------------|-----------------------------------------------------------|-------------------------------------------------------------------------------------------------------------------------------------------------------------------------------------------------------------------------------------------------------------------------------------------------------------------------------------------------------------------------------------------------------------------------------------------------------------------------------------------------------------------------------------------------------------------------------------------------------------------------------------------------------------------------------------------------------------------------------------------------------------------------------------------------------------------------------------------------------------------------|--------------------------------------------------------------------------------------------------------------------------------------------------------------------------------------------------------------------------------------------------------------------------------------------------------------------------------------------------------------------------------------------------------------------------------------------------------------------------------------------------------------------------------------------------------------------------------------------------------------------------------------------------------------------------------------------------------------------------------------------------------------------------|-----------------------------|-------------------------|----------------------|
| GF003674 | 0                        | 1                | 0                 | Hypothetical protein (1)                                  | hydrolase activity [GO:0016787 molecular_function] (1)                                                                                                                                                                                                                                                                                                                                                                                                                                                                                                                                                                                                                                                                                                                                                                                                                  | Pectinacetylesterase-NOFUM [IPR006963] (1)                                                                                                                                                                                                                                                                                                                                                                                                                                                                                                                                                                                                                                                                                                                               | -                           | C_uni96_00275_mRNA_33.1 | -                    |
| GF003673 | 0                        | 1                | 0                 | Hypothetical protein (1)                                  | -                                                                                                                                                                                                                                                                                                                                                                                                                                                                                                                                                                                                                                                                                                                                                                                                                                                                       | -                                                                                                                                                                                                                                                                                                                                                                                                                                                                                                                                                                                                                                                                                                                                                                        | -                           | C_uni96_00275_mRNA_32.1 | -                    |
| GF003672 | 0                        | 1                | 0                 | Hypothetical protein (1)                                  | -                                                                                                                                                                                                                                                                                                                                                                                                                                                                                                                                                                                                                                                                                                                                                                                                                                                                       | -                                                                                                                                                                                                                                                                                                                                                                                                                                                                                                                                                                                                                                                                                                                                                                        | -                           | C_uni96_00275_mRNA_31.1 | -                    |
| GF003671 | 0                        | 1                | 0                 | Hypothetical protein (1)                                  | -                                                                                                                                                                                                                                                                                                                                                                                                                                                                                                                                                                                                                                                                                                                                                                                                                                                                       | -                                                                                                                                                                                                                                                                                                                                                                                                                                                                                                                                                                                                                                                                                                                                                                        | -                           | C_uni96_00275_mRNA_27.1 | -                    |
| GF003670 | 0                        | 1                | 0                 | Hypothetical protein (1)                                  | -                                                                                                                                                                                                                                                                                                                                                                                                                                                                                                                                                                                                                                                                                                                                                                                                                                                                       | -                                                                                                                                                                                                                                                                                                                                                                                                                                                                                                                                                                                                                                                                                                                                                                        | -                           | C_uni96_00275_mRNA_18.1 | -                    |
| GF003669 | 0                        | 1                | 0                 | Hypothetical protein (1)                                  | -                                                                                                                                                                                                                                                                                                                                                                                                                                                                                                                                                                                                                                                                                                                                                                                                                                                                       | -                                                                                                                                                                                                                                                                                                                                                                                                                                                                                                                                                                                                                                                                                                                                                                        | -                           | C_uni96_00275_mRNA_11.1 | -                    |
| GF003668 | 0                        | 1                | 0                 | Hypothetical protein (1)                                  | -                                                                                                                                                                                                                                                                                                                                                                                                                                                                                                                                                                                                                                                                                                                                                                                                                                                                       | -                                                                                                                                                                                                                                                                                                                                                                                                                                                                                                                                                                                                                                                                                                                                                                        | -                           | C_uni96_00274_mRNA_7.1  | -                    |
| GF003667 | 0                        | 1                | 0                 | Hypothetical protein (1)                                  | -                                                                                                                                                                                                                                                                                                                                                                                                                                                                                                                                                                                                                                                                                                                                                                                                                                                                       | -                                                                                                                                                                                                                                                                                                                                                                                                                                                                                                                                                                                                                                                                                                                                                                        | -                           | C_uni96_00274_mRNA_35.1 | -                    |
| GF003666 | 0                        | 1                | 0                 | Hypothetical protein (1)                                  | -                                                                                                                                                                                                                                                                                                                                                                                                                                                                                                                                                                                                                                                                                                                                                                                                                                                                       | -                                                                                                                                                                                                                                                                                                                                                                                                                                                                                                                                                                                                                                                                                                                                                                        | -                           | C_uni96_00274_mRNA_34.1 | -                    |
| GF003665 | 0                        | 1                | 0                 | Hypothetical protein (1)                                  | -                                                                                                                                                                                                                                                                                                                                                                                                                                                                                                                                                                                                                                                                                                                                                                                                                                                                       | -                                                                                                                                                                                                                                                                                                                                                                                                                                                                                                                                                                                                                                                                                                                                                                        | -                           | C_uni96_00274_mRNA_31.1 | -                    |
| GF003664 | 0                        | 1                | 0                 | Hypothetical protein (1)                                  | -                                                                                                                                                                                                                                                                                                                                                                                                                                                                                                                                                                                                                                                                                                                                                                                                                                                                       | -                                                                                                                                                                                                                                                                                                                                                                                                                                                                                                                                                                                                                                                                                                                                                                        | -                           | C_uni96_00274_mRNA_23.1 | -                    |
| GF003663 | 0                        | 1                | 0                 | Hypothetical protein (1)                                  | -                                                                                                                                                                                                                                                                                                                                                                                                                                                                                                                                                                                                                                                                                                                                                                                                                                                                       | -                                                                                                                                                                                                                                                                                                                                                                                                                                                                                                                                                                                                                                                                                                                                                                        | -                           | C_uni96_00274_mRNA_22.1 | -                    |
| GF003662 | 0                        | 1                | 0                 | Hypothetical protein (1)                                  | -                                                                                                                                                                                                                                                                                                                                                                                                                                                                                                                                                                                                                                                                                                                                                                                                                                                                       | -                                                                                                                                                                                                                                                                                                                                                                                                                                                                                                                                                                                                                                                                                                                                                                        | -                           | C_uni96_00274_mRNA_20.1 | -                    |
| GF003661 | 0                        | 1                | 0                 | Hypothetical protein (1)                                  | -                                                                                                                                                                                                                                                                                                                                                                                                                                                                                                                                                                                                                                                                                                                                                                                                                                                                       | -                                                                                                                                                                                                                                                                                                                                                                                                                                                                                                                                                                                                                                                                                                                                                                        | -                           | C_uni96_00274_mRNA_19.1 | -                    |
| GF003660 | 0                        | 1                | 0                 | Hypothetical protein (1)                                  | -                                                                                                                                                                                                                                                                                                                                                                                                                                                                                                                                                                                                                                                                                                                                                                                                                                                                       | -                                                                                                                                                                                                                                                                                                                                                                                                                                                                                                                                                                                                                                                                                                                                                                        | -                           | C_uni96_00274_mRNA_16.1 | -                    |
| GF003659 | 0                        | 1                | 0                 | Hypothetical protein (1)                                  | -                                                                                                                                                                                                                                                                                                                                                                                                                                                                                                                                                                                                                                                                                                                                                                                                                                                                       | -                                                                                                                                                                                                                                                                                                                                                                                                                                                                                                                                                                                                                                                                                                                                                                        | -                           | C_uni96_00274_mRNA_12.1 | -                    |
| GF003658 | 0                        | 1                | 0                 | Hypothetical protein (1)                                  | ATP binding [GO:0005524 molecular_function] (1); protein kinase activity [GO:0004672 molecular_function] (1); protein phosphorylation [GO:0006468 biological_process] (1); recognition of pollen [GO:0048544 biological_process] (1)                                                                                                                                                                                                                                                                                                                                                                                                                                                                                                                                                                                                                                    | Retrosposon gap domain [IPR005162] (4); PAN-uptake domain [IPR003609] (1); Bulb-type lectin domain [IPR001480] (1); Serine/threonine-protein kinase, active site [IPR002711] (1); Serine/threonine-specific protein kinase, catalytic domain [IPR002290] (1); Leucine glycoprotein domain [IPR006058] (1); Protein kinase-like domain [IPR010099] (1); Protein kinase domain [IPR000719] (1)                                                                                                                                                                                                                                                                                                                                                                             | -                           | C_uni96_00274_mRNA_10.1 |                      |
| GF003657 | 0                        | 1                | 0                 | Hypothetical protein (1)                                  | proteolysis [GO:0006508 biological_process] (1); cysteine-type peptidase activity [GO:0008234 molecular_function] (1)                                                                                                                                                                                                                                                                                                                                                                                                                                                                                                                                                                                                                                                                                                                                                   | Ulp1 protease family, C-terminal catalytic domain [IPR003653] (1)                                                                                                                                                                                                                                                                                                                                                                                                                                                                                                                                                                                                                                                                                                        | -                           | C_uni96_00273_mRNA_32.1 |                      |
| GF003655 | 0                        | 1                | 0                 | Hypothetical protein (1)                                  | regulation of transcription, DNA-templated [GO:0006355 biological_process] (1); methyltransferase activity [GO:0008168 molecular_function] (1); methylation [GO:0002539 biological_process] (1); nucleic acid binding [GO:0003676 molecular_function] (1)                                                                                                                                                                                                                                                                                                                                                                                                                                                                                                                                                                                                               | FH3YFAR1 family [IPR010522] (1); FAR1 DNA binding domain [IPR004330] (1)                                                                                                                                                                                                                                                                                                                                                                                                                                                                                                                                                                                                                                                                                                 | -                           | C_uni96_00273_mRNA_19.1 |                      |
| GF003654 | 0                        | 1                | 0                 | Hypothetical protein (1)                                  | N(6)-adenine-specific DNA methyltransferase 2 (1)                                                                                                                                                                                                                                                                                                                                                                                                                                                                                                                                                                                                                                                                                                                                                                                                                       | Protein-lysine N-methyltransferase Elnf [IPR019369] (1); DNA methylase, N-6 adenosine-specific, conserved site [IPR000252] (1)                                                                                                                                                                                                                                                                                                                                                                                                                                                                                                                                                                                                                                           | -                           | C_uni96_00273_mRNA_14.1 |                      |
| GF003652 | 0                        | 1                | 0                 | Hypothetical protein (1)                                  | ADP binding [GO:0043531 molecular_function] (1)                                                                                                                                                                                                                                                                                                                                                                                                                                                                                                                                                                                                                                                                                                                                                                                                                         | P-loop containing nucleoside triphosphate hydrolase [IPR027417] (1); NB-ARC [IPR002182] (1)                                                                                                                                                                                                                                                                                                                                                                                                                                                                                                                                                                                                                                                                              | -                           | C_uni96_00272_mRNA_9.1  |                      |
| GF003650 | 0                        | 1                | 0                 | Hypothetical protein (1)                                  | ATP binding [GO:0005524 molecular_function] (1); ATPase activity [GO:0016887 molecular_function] (1); membrane [GO:0009960 cellular_component] (1)                                                                                                                                                                                                                                                                                                                                                                                                                                                                                                                                                                                                                                                                                                                      | ABC transporter-like [IPR003499] (1); ABC-2 type transporter [IPR015252] (1); AAA+ ATPase domain [IPR005931] (1); P-loop containing nucleoside triphosphate hydrolase [IPR027417] (1); Pfam PF08 ABC transporter associated [IPR015381] (1)                                                                                                                                                                                                                                                                                                                                                                                                                                                                                                                              | C_uni96_00272_mRNA_7.1      |                         |                      |
| GF003649 | 0                        | 1                | 0                 | Phenotypic drug resistance protein 3 (1)                  | membrane [GO:0001602 cellular_component] (1); ATPase activity [GO:0016887 molecular_function] (1); ATP binding [GO:0005524 molecular_function] (1)                                                                                                                                                                                                                                                                                                                                                                                                                                                                                                                                                                                                                                                                                                                      | Pfam PF08 ABC transporter associated [IPR015381] (1); ABC transporter-like [IPR003499] (1); ABC-2 type transporter [IPR015252] (1); AAA+ ATPase domain [IPR005931] (1); P-loop containing nucleoside triphosphate hydrolase [IPR027417] (1)                                                                                                                                                                                                                                                                                                                                                                                                                                                                                                                              | -                           | C_uni96_00272_mRNA_4.1  |                      |
| GF003648 | 0                        | 1                | 0                 | Hypothetical protein (1)                                  | ADP binding [GO:0043531 molecular_function] (1)                                                                                                                                                                                                                                                                                                                                                                                                                                                                                                                                                                                                                                                                                                                                                                                                                         | P-loop containing nucleoside triphosphate hydrolase [IPR027417] (1); NB-ARC [IPR002182] (1)                                                                                                                                                                                                                                                                                                                                                                                                                                                                                                                                                                                                                                                                              | -                           | C_uni96_00272_mRNA_25.1 |                      |
| GF003647 | 0                        | 1                | 0                 | Hypothetical protein (1)                                  | ATP binding [GO:0005524 molecular_function] (1); nucleic acid binding [GO:0003676 molecular_function] (1)                                                                                                                                                                                                                                                                                                                                                                                                                                                                                                                                                                                                                                                                                                                                                               | Helicase superfamily 1/2, ATP-binding domain [IPR014001] (1); DEAD/DEAH box helicase domain [IPR011545] (1); P-loop containing nucleoside triphosphate hydrolase [IPR027417] (1)                                                                                                                                                                                                                                                                                                                                                                                                                                                                                                                                                                                         | -                           | C_uni96_00272_mRNA_10.1 |                      |
| GF003645 | 0                        | 1                | 0                 | Hypothetical protein (1)                                  | ATP binding [GO:0005524 molecular_function] (1)                                                                                                                                                                                                                                                                                                                                                                                                                                                                                                                                                                                                                                                                                                                                                                                                                         | ATPase, F1/V1/AT complex, alpha/beta subunit, nucleotide-binding domain [IPR001940] (1); P-loop containing nucleoside triphosphate hydrolase [IPR027417] (1)                                                                                                                                                                                                                                                                                                                                                                                                                                                                                                                                                                                                             | -                           | C_uni96_00271_mRNA_5.1  |                      |
| GF003644 | 0                        | 1                | 0                 | Hypothetical protein (1)                                  | -                                                                                                                                                                                                                                                                                                                                                                                                                                                                                                                                                                                                                                                                                                                                                                                                                                                                       | -                                                                                                                                                                                                                                                                                                                                                                                                                                                                                                                                                                                                                                                                                                                                                                        | -                           | C_uni96_00271_mRNA_40.1 |                      |
| GF003643 | 0                        | 1                | 0                 | Hypothetical protein (1)                                  | -                                                                                                                                                                                                                                                                                                                                                                                                                                                                                                                                                                                                                                                                                                                                                                                                                                                                       | -                                                                                                                                                                                                                                                                                                                                                                                                                                                                                                                                                                                                                                                                                                                                                                        | -                           | C_uni96_00271_mRNA_33.1 |                      |
| GF003642 | 0                        | 1                | 0                 | Zinc finger HIT domain-containing protein 1 (1)           | proton-transporting ATPase activity, rotational mechanism [GO:0046963 molecular_function] (1); ATP binding [GO:0005524 molecular_function] (1); proton-transporting ATP synthase activity, rotational mechanism [GO:0046963 molecular_function] (1); proton-transporting ATP synthase complex, catalytic core F1 [GO:0045261 cellular_component] (1); ATP metabolic process [GO:0046034 biological_process] (1); ATP hydrolysis-coupled proton transport [GO:0015991 biological_process] (1); proton-transporting two-sector ATPase complex, catalytic domain [GO:0033178 cellular_component] (1); hydrolase activity, acting on acid anhydrides, catalyzing transmembrane movement of substances [GO:0010629 molecular_function] (1); protein transport [GO:0015992 biological_process] (1); ATP synthase coupled proton transport [GO:0015986 biological_process] (1) | Zinc finger, HIT-type [IPR007529] (1)                                                                                                                                                                                                                                                                                                                                                                                                                                                                                                                                                                                                                                                                                                                                    | -                           | C_uni96_00271_mRNA_24.1 |                      |
| GF003641 | 0                        | 1                | 0                 | ATP synthase subunit beta, chloroplast (1)                | NADH dehydrogenase (ubiquinone) activity [GO:0008137 molecular_function] (1); quinone binding [GO:0048038 molecular_function] (1); oxidoreduction process [GO:005511 biological_process] (1); 4 iron, 4 sulfur cluster binding [GO:0001539 molecular_function] (1); iron-sulfur cluster binding [GO:0001536 molecular_function] (1)                                                                                                                                                                                                                                                                                                                                                                                                                                                                                                                                     | ATPase, F1 complex alpha beta subunit, N-terminal domain [IPR004100] (1); ATPase, alpha/beta subunit, nucleotide-binding domain, active site [IPR000003] (1); ATPase, F1 complex beta subunit/V1 complex, C-terminal [IPR020454] (1); ATP synthase delta spinon subunit, C-terminal domain [IPR020547] (1); ATPase, F1/V1/AT complex, alpha/beta subunit, C-terminal [IPR000931] (1); ATPase, F1 complex, beta subunit [IPR005722] (1); P-loop containing nucleoside triphosphate hydrolase [IPR027417] (1); ATPase, F1/V1/AT complex, alpha/beta subunit, nucleotide-binding domain [IPR001940] (1); AAA+ ATPase domain [IPR005931] (1); ATPase, F1 complex, delta spinon subunit, N-terminal [IPR020546] (1); ATPase, F1 complex, delta spinon subunit [IPR001469] (1) | -                           | C_uni96_00271_mRNA_2.1  |                      |
| GF003640 | 0                        | 1                | 0                 | Hypothetical protein (1)                                  | NADH dehydrogenase (ubiquinone) activity [GO:0008137 molecular_function] (1); quinone binding [GO:0048038 molecular_function] (1); oxidoreduction process [GO:005511 biological_process] (1); 4 iron, 4 sulfur cluster binding [GO:0001539 molecular_function] (1); iron-sulfur cluster binding [GO:0001536 molecular_function] (1)                                                                                                                                                                                                                                                                                                                                                                                                                                                                                                                                     | NADH-ubiquinone oxidoreductase, 20 kDa subunit [IPR006137] (1)                                                                                                                                                                                                                                                                                                                                                                                                                                                                                                                                                                                                                                                                                                           | -                           | C_uni96_00271_mRNA_13.1 |                      |
| GF003639 | 0                        | 1                | 0                 | NAD(P)H-quinone oxidoreductase subunit K, chloroplast (1) | NAD(P)H-quinone oxidoreductase subunit K, chloroplast (1)                                                                                                                                                                                                                                                                                                                                                                                                                                                                                                                                                                                                                                                                                                                                                                                                               | NADH-ubiquinone oxidoreductase-like, 20kDa subunit [IPR006137] (1)                                                                                                                                                                                                                                                                                                                                                                                                                                                                                                                                                                                                                                                                                                       | -                           | C_uni96_00271_mRNA_1.1  |                      |
| GF003638 | 0                        | 1                | 0                 | Hypothetical protein (1)                                  | -                                                                                                                                                                                                                                                                                                                                                                                                                                                                                                                                                                                                                                                                                                                                                                                                                                                                       | -                                                                                                                                                                                                                                                                                                                                                                                                                                                                                                                                                                                                                                                                                                                                                                        | -                           | C_uni96_00270_mRNA_6.1  |                      |
| GF003637 | 0                        | 1                | 0                 | Hypothetical protein (1)                                  | -                                                                                                                                                                                                                                                                                                                                                                                                                                                                                                                                                                                                                                                                                                                                                                                                                                                                       | -                                                                                                                                                                                                                                                                                                                                                                                                                                                                                                                                                                                                                                                                                                                                                                        | -                           | C_uni96_00270_mRNA_5.1  |                      |
| GF003636 | 0                        | 1                | 0                 | Hypothetical protein (1)                                  | -                                                                                                                                                                                                                                                                                                                                                                                                                                                                                                                                                                                                                                                                                                                                                                                                                                                                       | -                                                                                                                                                                                                                                                                                                                                                                                                                                                                                                                                                                                                                                                                                                                                                                        | -                           | C_uni96_00270_mRNA_4.1  |                      |
| GF003635 | 0                        | 1                | 0                 | Hypothetical protein (1)                                  | -                                                                                                                                                                                                                                                                                                                                                                                                                                                                                                                                                                                                                                                                                                                                                                                                                                                                       | -                                                                                                                                                                                                                                                                                                                                                                                                                                                                                                                                                                                                                                                                                                                                                                        | -                           | C_uni96_00270_mRNA_3.1  |                      |
| GF003634 | 0                        | 1                | 0                 | Hypothetical protein (1)                                  | nucleic acid binding [GO:0003676 molecular_function] (1)                                                                                                                                                                                                                                                                                                                                                                                                                                                                                                                                                                                                                                                                                                                                                                                                                | Reverse transcriptase, RNA-dependent DNA polymerase [IPR011031] (1); RhoNuclease H-like domain [IPR012337] (1)                                                                                                                                                                                                                                                                                                                                                                                                                                                                                                                                                                                                                                                           | -                           | C_uni96_00270_mRNA_14.1 |                      |
| GF003633 | 0                        | 1                | 0                 | Hypothetical protein (1)                                  | -                                                                                                                                                                                                                                                                                                                                                                                                                                                                                                                                                                                                                                                                                                                                                                                                                                                                       | -                                                                                                                                                                                                                                                                                                                                                                                                                                                                                                                                                                                                                                                                                                                                                                        | -                           | C_uni96_00270_mRNA_1.1  |                      |
| GF003632 | 0                        | 1                | 0                 | Hypothetical protein (1)                                  | methyltransferase activity [GO:0008168 molecular_function] (1)                                                                                                                                                                                                                                                                                                                                                                                                                                                                                                                                                                                                                                                                                                                                                                                                          | S-adenosyl-L-methionine-dependent methyltransferase [IPR029063] (1); Putative S-adenosyl-L-methionine-dependent methyltransferase [IPR004159] (1)                                                                                                                                                                                                                                                                                                                                                                                                                                                                                                                                                                                                                        | -                           | C_uni96_00269_mRNA_7.1  |                      |
| GF003631 | 0                        | 1                | 0                 | Hypothetical protein (1)                                  | nucleic acid binding [GO:0003676 molecular_function] (1); zinc ion binding [GO:0008270 molecular_function] (1)                                                                                                                                                                                                                                                                                                                                                                                                                                                                                                                                                                                                                                                                                                                                                          | Zinc finger, CCHC-type [IPR001878] (1)                                                                                                                                                                                                                                                                                                                                                                                                                                                                                                                                                                                                                                                                                                                                   | -                           | C_uni96_00269_mRNA_6.1  |                      |
| GF003630 | 0                        | 1                | 0                 | Hypothetical protein (1)                                  | -                                                                                                                                                                                                                                                                                                                                                                                                                                                                                                                                                                                                                                                                                                                                                                                                                                                                       | -                                                                                                                                                                                                                                                                                                                                                                                                                                                                                                                                                                                                                                                                                                                                                                        | -                           | C_uni96_00269_mRNA_30.1 |                      |
| GF003629 | 0                        | 1                | 0                 | Hypothetical protein (1)                                  | protein dimerization activity [GO:0046983 molecular_function] (1); nucleic acid binding [GO:0003676 molecular_function] (1)                                                                                                                                                                                                                                                                                                                                                                                                                                                                                                                                                                                                                                                                                                                                             | RhoNuclease H-like domain [IPR012337] (1); HIAT, C-terminal dimerization domain [IPR008906] (1)                                                                                                                                                                                                                                                                                                                                                                                                                                                                                                                                                                                                                                                                          | -                           | C_uni96_00269_mRNA_29.1 |                      |
| GF003628 | 0                        | 1                | 0                 | Putative copia-type pol polyprotein (1)                   | -                                                                                                                                                                                                                                                                                                                                                                                                                                                                                                                                                                                                                                                                                                                                                                                                                                                                       | -                                                                                                                                                                                                                                                                                                                                                                                                                                                                                                                                                                                                                                                                                                                                                                        | -                           | C_uni96_00269_mRNA_26.1 |                      |
| GF003627 | 0                        | 1                | 0                 | Hypothetical protein (1)                                  | -                                                                                                                                                                                                                                                                                                                                                                                                                                                                                                                                                                                                                                                                                                                                                                                                                                                                       | -                                                                                                                                                                                                                                                                                                                                                                                                                                                                                                                                                                                                                                                                                                                                                                        | -                           | C_uni96_00269_mRNA_23.1 |                      |
| GF003626 | 0                        | 1                | 0                 | Hypothetical protein (1)                                  | -                                                                                                                                                                                                                                                                                                                                                                                                                                                                                                                                                                                                                                                                                                                                                                                                                                                                       | -                                                                                                                                                                                                                                                                                                                                                                                                                                                                                                                                                                                                                                                                                                                                                                        | -                           | C_uni96_00269_mRNA_22.1 |                      |
| GF003625 | 0                        | 1                | 0                 | Hypothetical protein (1)                                  | carbohydrate binding [GO:0030246 molecular_function] (1)                                                                                                                                                                                                                                                                                                                                                                                                                                                                                                                                                                                                                                                                                                                                                                                                                | Concavardin A-like lectin/phycane domain [IPR013201] (1); Legume lectin domain [IPR001220] (1)                                                                                                                                                                                                                                                                                                                                                                                                                                                                                                                                                                                                                                                                           | -                           | C_uni96_00269_mRNA_12.1 |                      |
| GF003624 | 0                        | 1                | 0                 | Hypothetical protein (1)                                  | -                                                                                                                                                                                                                                                                                                                                                                                                                                                                                                                                                                                                                                                                                                                                                                                                                                                                       | -                                                                                                                                                                                                                                                                                                                                                                                                                                                                                                                                                                                                                                                                                                                                                                        | -                           | C_uni96_00269_mRNA_1.1  |                      |
| GF003623 | 0                        | 1                | 0                 | Hypothetical protein (1)                                  | -                                                                                                                                                                                                                                                                                                                                                                                                                                                                                                                                                                                                                                                                                                                                                                                                                                                                       | -                                                                                                                                                                                                                                                                                                                                                                                                                                                                                                                                                                                                                                                                                                                                                                        | -                           | C_uni96_00268_mRNA_5.1  |                      |
| GF003622 | 0                        | 1                | 0                 | Hypothetical protein (1)                                  | -                                                                                                                                                                                                                                                                                                                                                                                                                                                                                                                                                                                                                                                                                                                                                                                                                                                                       | -                                                                                                                                                                                                                                                                                                                                                                                                                                                                                                                                                                                                                                                                                                                                                                        | -                           | C_uni96_00268_mRNA_4.1  |                      |
| GF003621 | 0                        | 1                | 0                 | Hypothetical protein (1)                                  | proteolysis [GO:0006508 biological_process] (1); cysteine-type peptidase activity [GO:0008234 molecular_function] (1)                                                                                                                                                                                                                                                                                                                                                                                                                                                                                                                                                                                                                                                                                                                                                   | Ulp1 protease family, C-terminal catalytic domain [IPR003653] (1)                                                                                                                                                                                                                                                                                                                                                                                                                                                                                                                                                                                                                                                                                                        | -                           | C_uni96_00268_mRNA_3.1  |                      |
| GF003620 | 0                        | 1                | 0                 | Hypothetical protein (1)                                  | -                                                                                                                                                                                                                                                                                                                                                                                                                                                                                                                                                                                                                                                                                                                                                                                                                                                                       | -                                                                                                                                                                                                                                                                                                                                                                                                                                                                                                                                                                                                                                                                                                                                                                        | -                           | C_uni96_00268_mRNA_23.1 |                      |
| GF003619 | 0                        | 1                | 0                 | Hypothetical protein (1)                                  | Gluathione S-transferase TAU 25 (1)                                                                                                                                                                                                                                                                                                                                                                                                                                                                                                                                                                                                                                                                                                                                                                                                                                     | Gluathione S-transferase, C-terminal-like [IPR010987] (1)                                                                                                                                                                                                                                                                                                                                                                                                                                                                                                                                                                                                                                                                                                                | -                           | C_uni96_00267_mRNA_9.1  |                      |
| GF003618 | 0                        | 1                | 0                 | Hypothetical protein (1)                                  | exocyst subunit exo70 family protein (1)                                                                                                                                                                                                                                                                                                                                                                                                                                                                                                                                                                                                                                                                                                                                                                                                                                | Cullin repeat-like-containing domain [IPR011591] (1); Exocyst complex protein Exo70 [IPR004140] (1)                                                                                                                                                                                                                                                                                                                                                                                                                                                                                                                                                                                                                                                                      | -                           | C_uni96_00267_mRNA_4.1  |                      |
| GF003617 | 0                        | 1                | 0                 | Hypothetical protein (1)                                  | -                                                                                                                                                                                                                                                                                                                                                                                                                                                                                                                                                                                                                                                                                                                                                                                                                                                                       | -                                                                                                                                                                                                                                                                                                                                                                                                                                                                                                                                                                                                                                                                                                                                                                        | -                           | C_uni96_00267_mRNA_3.1  |                      |
| GF003616 | 0                        | 1                | 0                 | Hypothetical protein (1)                                  | -                                                                                                                                                                                                                                                                                                                                                                                                                                                                                                                                                                                                                                                                                                                                                                                                                                                                       | -                                                                                                                                                                                                                                                                                                                                                                                                                                                                                                                                                                                                                                                                                                                                                                        | -                           | C_uni96_00267_mRNA_15.1 |                      |
| GF003615 | 0                        | 1                | 0                 | Hypothetical protein (1)                                  | protein binding [GO:0005515 molecular_function] (1)                                                                                                                                                                                                                                                                                                                                                                                                                                                                                                                                                                                                                                                                                                                                                                                                                     | Thioredoxin-like fold [IPR012336] (1); Gluathione S-transferase, C-terminal-like [IPR010987] (1); Gluathione S-transferase, N-terminal [IPR000465] (1); Gluathione S-transferase, C-terminal-like [IPR010987] (1)                                                                                                                                                                                                                                                                                                                                                                                                                                                                                                                                                        | -                           | C_uni96_00267_mRNA_14.1 |                      |
| GF003614 | 0                        | 1                | 0                 | Hypothetical protein (1)                                  | Gluathione S-transferase U19 (1)                                                                                                                                                                                                                                                                                                                                                                                                                                                                                                                                                                                                                                                                                                                                                                                                                                        | Gluathione S-transferase, C-terminal-like [IPR010987] (1)                                                                                                                                                                                                                                                                                                                                                                                                                                                                                                                                                                                                                                                                                                                | -                           | C_uni96_00267_mRNA_13.1 |                      |
| GF003613 | 0                        | 1                | 0                 | Hypothetical protein (1)                                  | -                                                                                                                                                                                                                                                                                                                                                                                                                                                                                                                                                                                                                                                                                                                                                                                                                                                                       | -                                                                                                                                                                                                                                                                                                                                                                                                                                                                                                                                                                                                                                                                                                                                                                        | -                           | C_uni96_00267_mRNA_10.1 |                      |
| GF003612 | 0                        | 1                | 0                 | Hypothetical protein (1)                                  | -                                                                                                                                                                                                                                                                                                                                                                                                                                                                                                                                                                                                                                                                                                                                                                                                                                                                       | -                                                                                                                                                                                                                                                                                                                                                                                                                                                                                                                                                                                                                                                                                                                                                                        | -                           | C_uni96_00266_mRNA_6.1  |                      |
| GF003611 | 0                        | 1                | 0                 | Hypothetical protein (1)                                  | -                                                                                                                                                                                                                                                                                                                                                                                                                                                                                                                                                                                                                                                                                                                                                                                                                                                                       | -                                                                                                                                                                                                                                                                                                                                                                                                                                                                                                                                                                                                                                                                                                                                                                        | -                           | C_uni96_00266_mRNA_5.1  |                      |

| ID        | Num. in <i>C. crottensteini</i> | Num. in <i>C. caudata</i> | Num. in <i>P. putida</i> | Note                                                             | GO                                                                                                                                                                                                                                                                                                                                                                                                                                                                                                                                                                                                                | InterPro                                                                                                                                                                                                                                                                                                                                                                                                                                                                    | Members in <i>C. crottensteini</i> | Members in <i>C. caudata</i> | Members in <i>P. putida</i> |
|-----------|---------------------------------|---------------------------|--------------------------|------------------------------------------------------------------|-------------------------------------------------------------------------------------------------------------------------------------------------------------------------------------------------------------------------------------------------------------------------------------------------------------------------------------------------------------------------------------------------------------------------------------------------------------------------------------------------------------------------------------------------------------------------------------------------------------------|-----------------------------------------------------------------------------------------------------------------------------------------------------------------------------------------------------------------------------------------------------------------------------------------------------------------------------------------------------------------------------------------------------------------------------------------------------------------------------|------------------------------------|------------------------------|-----------------------------|
| GF003610  | 0                               | 1                         | 0                        | NADP-dependent alkaline double bond reductase (1)                | zinc ion binding [GO:0008270 molecular_function] (1); oxidoreductase activity [GO:004691 molecular_function] (1); oxidation-reduction process [GO:005514 biological_process] (1)                                                                                                                                                                                                                                                                                                                                                                                                                                  | NAD(P)-binding domain [IPR016040] (1); Alcohol dehydrogenase, C-terminal [IPR013149] (1); Polyketide synthase, enoylreductase domain [IPR020843] (1); Alcohol dehydrogenase superfamily, zinc-type [IPR020851] (1); GroES-like [IPR011022] (1)                                                                                                                                                                                                                              | -                                  | C_unihir_00266_mRNA_33.1     | -                           |
| GF0036109 | 0                               | 1                         | 0                        | NADP-dependent alkaline double bond reductase P2 (1)             | oxidoreductase activity [GO:0016491 molecular_function] (1); oxidation-reduction process [GO:005514 biological_process] (1); zinc ion binding [GO:0008270 molecular_function] (1)                                                                                                                                                                                                                                                                                                                                                                                                                                 | Leucine-rich repeat domain, L domain-like [IPR023675] (1); Leucine-rich repeat [IPR001611] (4)                                                                                                                                                                                                                                                                                                                                                                              | -                                  | C_unihir_00266_mRNA_23.1     | -                           |
| GF0036108 | 0                               | 1                         | 0                        | LETM1 and EF-hand domain-containing protein 1, mitochondrial (1) | ribosome binding [GO:0043022 molecular_function] (1)                                                                                                                                                                                                                                                                                                                                                                                                                                                                                                                                                              | LETM1-like [IPR011685] (1); Letm1 ribosome-binding domain [IPR031322] (1)                                                                                                                                                                                                                                                                                                                                                                                                   | -                                  | C_unihir_00266_mRNA_28.1     | -                           |
| GF0036107 | 0                               | 1                         | 0                        | Hypothetical protein (1)                                         | protein binding [GO:0005515 molecular_function] (1)                                                                                                                                                                                                                                                                                                                                                                                                                                                                                                                                                               | -                                                                                                                                                                                                                                                                                                                                                                                                                                                                           | -                                  | C_unihir_00266_mRNA_23.1     | -                           |
| GF0036106 | 0                               | 1                         | 0                        | Hypothetical protein (1)                                         | -                                                                                                                                                                                                                                                                                                                                                                                                                                                                                                                                                                                                                 | -                                                                                                                                                                                                                                                                                                                                                                                                                                                                           | -                                  | C_unihir_00266_mRNA_22.1     | -                           |
| GF0036105 | 0                               | 1                         | 0                        | Hypothetical protein (1)                                         | -                                                                                                                                                                                                                                                                                                                                                                                                                                                                                                                                                                                                                 | -                                                                                                                                                                                                                                                                                                                                                                                                                                                                           | -                                  | C_unihir_00266_mRNA_21.1     | -                           |
| GF0036104 | 0                               | 1                         | 0                        | Hypothetical protein (1)                                         | -                                                                                                                                                                                                                                                                                                                                                                                                                                                                                                                                                                                                                 | -                                                                                                                                                                                                                                                                                                                                                                                                                                                                           | -                                  | C_unihir_00266_mRNA_20.1     | -                           |
| GF0036103 | 0                               | 1                         | 0                        | Putative RNA-directed DNA polymerase (1)                         | RNA-DNA hybrid ribonuclease activity [GO:0004522 molecular_function] (1); nucleic acid binding [GO:0003676 molecular_function] (1)                                                                                                                                                                                                                                                                                                                                                                                                                                                                                | Ribonuclease H domain [IPR002156] (1); Ribonuclease H-like domain [IPR012337] (1)                                                                                                                                                                                                                                                                                                                                                                                           | -                                  | C_unihir_00266_mRNA_14.1     | -                           |
| GF0036102 | 0                               | 1                         | 0                        | Hypothetical protein (1)                                         | DNA binding [GO:0000377 molecular_function] (1); protein dimerization activity [GO:0046983 molecular_function] (1)                                                                                                                                                                                                                                                                                                                                                                                                                                                                                                | Transcription factor, MADS-box [IPR002100] (4)                                                                                                                                                                                                                                                                                                                                                                                                                              | -                                  | C_unihir_00266_mRNA_13.1     | -                           |
| GF0036101 | 0                               | 1                         | 0                        | Hypothetical protein (1)                                         | -                                                                                                                                                                                                                                                                                                                                                                                                                                                                                                                                                                                                                 | -                                                                                                                                                                                                                                                                                                                                                                                                                                                                           | -                                  | C_unihir_00266_mRNA_12.1     | -                           |
| GF0036100 | 0                               | 1                         | 0                        | Hypothetical protein (1)                                         | -                                                                                                                                                                                                                                                                                                                                                                                                                                                                                                                                                                                                                 | -                                                                                                                                                                                                                                                                                                                                                                                                                                                                           | -                                  | C_unihir_00266_mRNA_11.1     | -                           |
| GF0036099 | 0                               | 1                         | 0                        | Hypothetical protein (1)                                         | DNA-directed RNA polymerase activity [GO:0003999 molecular_function] (1); ribonucleoside binding [GO:0032549 molecular_function] (1); DNA binding [GO:0003677 molecular_function] (1); transcription, DNA-templated [GO:0006351 biological_process] (1)                                                                                                                                                                                                                                                                                                                                                           | RNA polymerase Rpb2, domain 7 [IPR007641] (1); DNA-directed RNA polymerase, subunit 2, domain 6 [IPR007120] (1); RNA polymerase Rpb2, Oh-646 [IPR017241] (1); RNA polymerase Rpb1, domain 3 [IPR007066] (1); RNA polymerase Rpb1, domain 1 [IPR007080] (1); RNA polymerase, beta subunit, conserved site [IPR007121] (1); DNA-directed RNA polymerase, subunit 2 [IPR015712] (1); RNA polymerase, alpha subunit [IPR000722] (1); RNA polymerase, N-terminal [IPR006952] (1) | -                                  | C_unihir_00265_mRNA_27.1     | -                           |
| GF0036098 | 0                               | 1                         | 0                        | Hypothetical protein (1)                                         | transcription, DNA-templated [GO:0006351 biological_process] (1); DNA binding [GO:0003677 molecular_function] (1); DNA-directed RNA polymerase activity [GO:0003999 molecular_function] (1)                                                                                                                                                                                                                                                                                                                                                                                                                       | RNA polymerase Rpb1, domain 5 [IPR007081] (4)                                                                                                                                                                                                                                                                                                                                                                                                                               | -                                  | C_unihir_00265_mRNA_25.1     | -                           |
| GF0036097 | 0                               | 1                         | 0                        | Hypothetical protein (1)                                         | translocation [GO:0006412 biological_process] (1); intracellular [GO:0005622 cellular_component] (1); structural constituent of ribosome [GO:0003735 molecular_function] (1); small ribosomal subunit [GO:0015935 cellular_component] (1); ribosome [GO:0005490 cellular_component] (1)                                                                                                                                                                                                                                                                                                                           | Ribosomal protein S2, bacterium/methanohalophilus [IPR005700] (1); Ribosomal protein S2, flavodoxin-like domain [IPR023591] (1); Ribosomal protein S2 [IPR001865] (1)                                                                                                                                                                                                                                                                                                       | -                                  | C_unihir_00265_mRNA_24.1     | -                           |
| GF0036096 | 0                               | 1                         | 0                        | 30S ribosomal protein S2, chloroplast (1)                        | hydrogen ion transmembrane transporter activity [GO:0015078 molecular_function] (1); ATP synthesis coupled proton transport [GO:0015986 biological_process] (1)                                                                                                                                                                                                                                                                                                                                                                                                                                                   | ATPase, F0 complex, subunit A, active site [IPR020111] (1); ATPase, F0 complex, subunit A [IPR000568] (1)                                                                                                                                                                                                                                                                                                                                                                   | -                                  | C_unihir_00265_mRNA_23.1     | -                           |
| GF0036095 | 0                               | 1                         | 0                        | ATP synthase subunit a, chloroplast (1)                          | ribosome [GO:0005490 cellular_component] (1); photosynthesis, light reaction [GO:00019684 biological_process] (1); electron carrier activity [GO:0000955 molecular_function] (1); translocation [GO:0006412 biological_process] (1); photosynthetic electron transport in photosystem II [GO:0009772 biological_process] (1); intracellular [GO:0005622 cellular_component] (1); electron transporter, transferring electrons within the cyclic electron transport pathway of photosynthesis activity [GO:0042516 molecular_function] (1); structural constituent of ribosome [GO:0003735 molecular_function] (1) | Photosystem II protein D1 [IPR005867] (1); Photosynthetic reaction centre, L/M [IPR004844] (1); Ribosomal protein S16, conserved site [IPR020992] (1)                                                                                                                                                                                                                                                                                                                       | -                                  | C_unihir_00265_mRNA_22.1     | -                           |
| GF0036094 | 0                               | 1                         | 0                        | Photosystem II protein D1 (1)                                    | translocation [GO:0006412 biological_process] (1); photosynthetic electron transport in photosystem II [GO:0009772 biological_process] (1); intracellular [GO:0005622 cellular_component] (1); electron transporter, transferring electrons within the cyclic electron transport pathway of photosynthesis activity [GO:0042516 molecular_function] (1); structural constituent of ribosome [GO:0003735 molecular_function] (1)                                                                                                                                                                                   | -                                                                                                                                                                                                                                                                                                                                                                                                                                                                           | -                                  | C_unihir_00265_mRNA_20.1     | -                           |
| GF0036093 | 0                               | 1                         | 0                        | Putative malDR family transposase-like (1)                       | nucleus [GO:0005634 cellular_component] (1); regulation of cell cycle [GO:0051726 biological_process] (1)                                                                                                                                                                                                                                                                                                                                                                                                                                                                                                         | Cyclin D, plant [IPR011093] (1); Cyclin-like [IPR017503] (1); Cyclin, N-terminal [IPR006671] (1)                                                                                                                                                                                                                                                                                                                                                                            | -                                  | C_unihir_00265_mRNA_2.1      | -                           |
| GF0036092 | 0                               | 1                         | 0                        | Hypothetical protein (1)                                         | -                                                                                                                                                                                                                                                                                                                                                                                                                                                                                                                                                                                                                 | Reverse transcriptase domain [IPR000477] (4)                                                                                                                                                                                                                                                                                                                                                                                                                                | -                                  | C_unihir_00265_mRNA_15.1     | -                           |
| GF0036091 | 0                               | 1                         | 0                        | Hypothetical protein (1)                                         | -                                                                                                                                                                                                                                                                                                                                                                                                                                                                                                                                                                                                                 | -                                                                                                                                                                                                                                                                                                                                                                                                                                                                           | -                                  | C_unihir_00265_mRNA_10.1     | -                           |
| GF0036090 | 0                               | 1                         | 0                        | Hypothetical protein (1)                                         | -                                                                                                                                                                                                                                                                                                                                                                                                                                                                                                                                                                                                                 | -                                                                                                                                                                                                                                                                                                                                                                                                                                                                           | -                                  | C_unihir_00264_mRNA_9.1      | -                           |
| GF0036089 | 0                               | 1                         | 0                        | Hypothetical protein (1)                                         | -                                                                                                                                                                                                                                                                                                                                                                                                                                                                                                                                                                                                                 | Retrotransposon gag domain [IPR005162] (4)                                                                                                                                                                                                                                                                                                                                                                                                                                  | -                                  | C_unihir_00264_mRNA_8.1      | -                           |
| GF0036088 | 0                               | 1                         | 0                        | Hypothetical protein (1)                                         | -                                                                                                                                                                                                                                                                                                                                                                                                                                                                                                                                                                                                                 | -                                                                                                                                                                                                                                                                                                                                                                                                                                                                           | -                                  | C_unihir_00264_mRNA_7.1      | -                           |
| GF0036087 | 0                               | 1                         | 0                        | Hypothetical protein (1)                                         | -                                                                                                                                                                                                                                                                                                                                                                                                                                                                                                                                                                                                                 | -                                                                                                                                                                                                                                                                                                                                                                                                                                                                           | -                                  | C_unihir_00264_mRNA_6.1      | -                           |
| GF0036086 | 0                               | 1                         | 0                        | Hypothetical protein (1)                                         | -                                                                                                                                                                                                                                                                                                                                                                                                                                                                                                                                                                                                                 | -                                                                                                                                                                                                                                                                                                                                                                                                                                                                           | -                                  | C_unihir_00264_mRNA_5.1      | -                           |
| GF0036085 | 0                               | 1                         | 0                        | Hypothetical protein (1)                                         | oxidation-reduction process [GO:005514 biological_process] (1); oxidoreductase activity, acting on paired donors, with incorporation or reduction of molecular oxygen [GO:0015765 molecular_function] (1); heme binding [GO:0020037 molecular_function] (1); zinc ion binding [GO:0008270 molecular_function] (1)                                                                                                                                                                                                                                                                                                 | Cytochrome P450 [IPR01128] (1)                                                                                                                                                                                                                                                                                                                                                                                                                                              | -                                  | C_unihir_00264_mRNA_23.1     | -                           |
| GF0036084 | 0                               | 1                         | 0                        | Hypothetical protein (1)                                         | -                                                                                                                                                                                                                                                                                                                                                                                                                                                                                                                                                                                                                 | -                                                                                                                                                                                                                                                                                                                                                                                                                                                                           | -                                  | C_unihir_00264_mRNA_21.1     | -                           |
| GF0036083 | 0                               | 1                         | 0                        | Hypothetical protein (1)                                         | DNA binding [GO:0000377 molecular_function] (1)                                                                                                                                                                                                                                                                                                                                                                                                                                                                                                                                                                   | hAT-like transposase, RNase-H fold [IPR025221] (1)                                                                                                                                                                                                                                                                                                                                                                                                                          | -                                  | C_unihir_00264_mRNA_2.1      | -                           |
| GF0036082 | 0                               | 1                         | 0                        | Hypothetical protein (1)                                         | nucleic acid binding [GO:0003676 molecular_function] (1); zinc ion binding [GO:0008270 molecular_function] (1)                                                                                                                                                                                                                                                                                                                                                                                                                                                                                                    | Zinc finger, CCHC-type [IPR001878] (1); Glyoxalase II/oxalate resistance protein [IPR029068] (4)                                                                                                                                                                                                                                                                                                                                                                            | -                                  | C_unihir_00264_mRNA_2.1      | -                           |
| GF0036081 | 0                               | 1                         | 0                        | Hypothetical protein (1)                                         | -                                                                                                                                                                                                                                                                                                                                                                                                                                                                                                                                                                                                                 | Domain of unknown function DUF4283 [IPR025558] (1); Ribonuclease H-like domain [IPR023373] (1); Reverse transcriptase zinc-binding domain [IPR020960] (1); Reverse transcriptase domain [IPR000477] (1); Endonuclease/cysteine phosphatase [IPR05135] (1)                                                                                                                                                                                                                   | -                                  | C_unihir_00264_mRNA_18.1     | -                           |
| GF0036080 | 0                               | 1                         | 0                        | Hypothetical protein (1)                                         | nucleic acid binding [GO:0003676 molecular_function] (1)                                                                                                                                                                                                                                                                                                                                                                                                                                                                                                                                                          | -                                                                                                                                                                                                                                                                                                                                                                                                                                                                           | -                                  | C_unihir_00264_mRNA_16.1     | -                           |
| GF0036079 | 0                               | 1                         | 0                        | Nodulin MN21/EamA-like transporter family protein (1)            | integral component of membrane [GO:0016021 cellular_component] (1); transmembrane transporter activity [GO:0022857 molecular_function] (1); membrane [GO:0016020 cellular_component] (1)                                                                                                                                                                                                                                                                                                                                                                                                                          | EamA domain [IPR000620] (1); WAT1-related protein [IPR030184] (1)                                                                                                                                                                                                                                                                                                                                                                                                           | -                                  | C_unihir_00264_mRNA_1.1      | -                           |
| GF0036078 | 0                               | 1                         | 0                        | Hypothetical protein (1)                                         | -                                                                                                                                                                                                                                                                                                                                                                                                                                                                                                                                                                                                                 | -                                                                                                                                                                                                                                                                                                                                                                                                                                                                           | -                                  | C_unihir_00263_mRNA_9.1      | -                           |
| GF0036077 | 0                               | 1                         | 0                        | Hypothetical protein (1)                                         | proteolysis [GO:0006508 biological_process] (1); cysteine-type peptidase activity [GO:0008234 molecular_function] (1)                                                                                                                                                                                                                                                                                                                                                                                                                                                                                             | Ulp1 protease family, C-terminal catalytic domain [IPR030453] (1)                                                                                                                                                                                                                                                                                                                                                                                                           | -                                  | C_unihir_00263_mRNA_6.1      | -                           |
| GF0036076 | 0                               | 1                         | 0                        | Hypothetical protein (1)                                         | -                                                                                                                                                                                                                                                                                                                                                                                                                                                                                                                                                                                                                 | -                                                                                                                                                                                                                                                                                                                                                                                                                                                                           | -                                  | C_unihir_00263_mRNA_28.1     | -                           |
| GF0036075 | 0                               | 1                         | 0                        | Hypothetical protein (1)                                         | -                                                                                                                                                                                                                                                                                                                                                                                                                                                                                                                                                                                                                 | Domain of unknown function DUF1336 [IPR009709] (1)                                                                                                                                                                                                                                                                                                                                                                                                                          | -                                  | C_unihir_00263_mRNA_26.1     | -                           |
| GF0036074 | 0                               | 1                         | 0                        | Hypothetical protein (1)                                         | -                                                                                                                                                                                                                                                                                                                                                                                                                                                                                                                                                                                                                 | -                                                                                                                                                                                                                                                                                                                                                                                                                                                                           | -                                  | C_unihir_00263_mRNA_24.1     | -                           |
| GF0036073 | 0                               | 1                         | 0                        | Hypothetical protein (1)                                         | ADP binding [GO:0043531 molecular_function] (1)                                                                                                                                                                                                                                                                                                                                                                                                                                                                                                                                                                   | NB-ARC [IPR021812] (1); P-loop containing nucleoside triphosphate hydrolase [IPR027417] (1)                                                                                                                                                                                                                                                                                                                                                                                 | -                                  | C_unihir_00263_mRNA_23.1     | -                           |
| GF0036072 | 0                               | 1                         | 0                        | Hypothetical protein (1)                                         | -                                                                                                                                                                                                                                                                                                                                                                                                                                                                                                                                                                                                                 | -                                                                                                                                                                                                                                                                                                                                                                                                                                                                           | -                                  | C_unihir_00263_mRNA_21.1     | -                           |
| GF0036071 | 0                               | 1                         | 0                        | Hypothetical protein (1)                                         | -                                                                                                                                                                                                                                                                                                                                                                                                                                                                                                                                                                                                                 | -                                                                                                                                                                                                                                                                                                                                                                                                                                                                           | -                                  | C_unihir_00263_mRNA_19.1     | -                           |
| GF0036070 | 0                               | 1                         | 0                        | Cyclin-like rhodase F-transphosphatase phosphohydrolyase (1)     | -                                                                                                                                                                                                                                                                                                                                                                                                                                                                                                                                                                                                                 | LOG family [IPR031100] (1)                                                                                                                                                                                                                                                                                                                                                                                                                                                  | -                                  | C_unihir_00263_mRNA_18.1     | -                           |
| GF0036069 | 0                               | 1                         | 0                        | Hypothetical protein (1)                                         | nucleic acid binding [GO:0003676 molecular_function] (1)                                                                                                                                                                                                                                                                                                                                                                                                                                                                                                                                                          | Ribonuclease H-like domain [IPR012337] (1)                                                                                                                                                                                                                                                                                                                                                                                                                                  | -                                  | C_unihir_00263_mRNA_13.1     | -                           |
| GF0036068 | 0                               | 1                         | 0                        | Hypothetical protein (1)                                         | -                                                                                                                                                                                                                                                                                                                                                                                                                                                                                                                                                                                                                 | -                                                                                                                                                                                                                                                                                                                                                                                                                                                                           | -                                  | C_unihir_00263_mRNA_10.1     | -                           |
| GF0036067 | 0                               | 1                         | 0                        | Hypothetical protein (1)                                         | ATP binding [GO:0005524 molecular_function] (1); protein phosphorylation [GO:0006468 biological_process] (1); protein kinase activity [GO:0004672 molecular_function] (1)                                                                                                                                                                                                                                                                                                                                                                                                                                         | Protein kinase domain [IPR000719] (1); Protein kinase-like domain [IPR011009] (1)                                                                                                                                                                                                                                                                                                                                                                                           | -                                  | C_unihir_00261_mRNA_5.1      | -                           |
| GF0036066 | 0                               | 1                         | 0                        | Hypothetical protein (1)                                         | -                                                                                                                                                                                                                                                                                                                                                                                                                                                                                                                                                                                                                 | -                                                                                                                                                                                                                                                                                                                                                                                                                                                                           | -                                  | C_unihir_00261_mRNA_40.1     | -                           |
| GF0036065 | 0                               | 1                         | 0                        | Hypothetical protein (1)                                         | -                                                                                                                                                                                                                                                                                                                                                                                                                                                                                                                                                                                                                 | -                                                                                                                                                                                                                                                                                                                                                                                                                                                                           | -                                  | C_unihir_00261_mRNA_38.1     | -                           |
| GF0036064 | 0                               | 1                         | 0                        | Hypothetical protein (1)                                         | -                                                                                                                                                                                                                                                                                                                                                                                                                                                                                                                                                                                                                 | -                                                                                                                                                                                                                                                                                                                                                                                                                                                                           | -                                  | C_unihir_00261_mRNA_35.1     | -                           |
| GF0036063 | 0                               | 1                         | 0                        | Hypothetical protein (1)                                         | -                                                                                                                                                                                                                                                                                                                                                                                                                                                                                                                                                                                                                 | -                                                                                                                                                                                                                                                                                                                                                                                                                                                                           | -                                  | C_unihir_00261_mRNA_34.1     | -                           |
| GF0036062 | 0                               | 1                         | 0                        | Hypothetical protein (1)                                         | -                                                                                                                                                                                                                                                                                                                                                                                                                                                                                                                                                                                                                 | -                                                                                                                                                                                                                                                                                                                                                                                                                                                                           | -                                  | C_unihir_00261_mRNA_32.1     | -                           |
| GF0036061 | 0                               | 1                         | 0                        | Hypothetical protein (1)                                         | -                                                                                                                                                                                                                                                                                                                                                                                                                                                                                                                                                                                                                 | -                                                                                                                                                                                                                                                                                                                                                                                                                                                                           | -                                  | C_unihir_00261_mRNA_27.1     | -                           |
| GF0036060 | 0                               | 1                         | 0                        | Kinase light chain, putative (1)                                 | protein binding [GO:0005515 molecular_function] (1)                                                                                                                                                                                                                                                                                                                                                                                                                                                                                                                                                               | Tetratricopeptide repeat [IPR019734] (1); Tetratricopeptide repeat-containing domain [IPR013025] (1); Tetratricopeptide-like helical domain [IPR011980] (4); Tetratricopeptide repeat 2 [IPR013105] (1)                                                                                                                                                                                                                                                                     | -                                  | C_unihir_00261_mRNA_16.1     | -                           |
| GF0036059 | 0                               | 1                         | 0                        | Hypothetical protein (1)                                         | metal ion binding [GO:0046872 molecular_function] (1); nucleoside binding [GO:0001646 molecular_function] (1)                                                                                                                                                                                                                                                                                                                                                                                                                                                                                                     | P-type ATPase, A domain [IPR008250] (1); Cation-transporting P-type ATPase, N-terminal [IPR040014] (1)                                                                                                                                                                                                                                                                                                                                                                      | -                                  | C_unihir_00261_mRNA_1.1      | -                           |



| ID       | Num. in <i>C. crottensteini</i> | Num. in <i>C. caudis</i> | Num. in <i>P. putida</i> | Note                                                                       | GO                                                                                                                                                                                                                                                                                                                | InterPro                                                                                                                                                                                                                                                                                                                                                                            | Members in <i>Crottensteini</i> | Members in <i>Caudis</i> | Members in <i>Putida</i> |
|----------|---------------------------------|--------------------------|--------------------------|----------------------------------------------------------------------------|-------------------------------------------------------------------------------------------------------------------------------------------------------------------------------------------------------------------------------------------------------------------------------------------------------------------|-------------------------------------------------------------------------------------------------------------------------------------------------------------------------------------------------------------------------------------------------------------------------------------------------------------------------------------------------------------------------------------|---------------------------------|--------------------------|--------------------------|
| GF003658 | 0                               | 1                        | 1                        | UDP-glucose flavonoid 3-O-glucosyltransferase 7 (1)                        | transferase activity, transferring hexosyl group [GO:0016758 molecular_function] (1); metabolic process [GO:0008152 biological_process] (1)                                                                                                                                                                       | UDP-glucosyltransferase [IPRO2231] (1)                                                                                                                                                                                                                                                                                                                                              | -                               | C_unihub_00260_mRNA_3.1  | -                        |
| GF003657 | 0                               | 1                        | 1                        | Hypothetical protein (1)                                                   | heme binding [GO:002037 molecular_function] (1); iron ion binding [GO:005506 molecular_function] (1); oxidoreductase activity, acting on paired donors, with incorporation or reduction of molecular oxygen [GO:0016705 molecular_function] (1); oxidation-reduction process [GO:0055114 biological_process] (1)  | -                                                                                                                                                                                                                                                                                                                                                                                   | -                               | C_unihub_00260_mRNA_24.1 | -                        |
| GF003656 | 0                               | 1                        | 1                        | Flavonoid 3'-oxygenase (1)                                                 | oxidoreductase activity, acting on paired donors, with incorporation or reduction of molecular oxygen [GO:0016705 molecular_function] (1); oxidation-reduction process [GO:0055114 biological_process] (1)                                                                                                        | Cytochrome P450, E-class, group I [IPRO02401] (1); Cytochrome P450, conserved site [IPRO17972] (1); Cytochrome P450 [IPRO01128] (1)                                                                                                                                                                                                                                                 | -                               | C_unihub_00260_mRNA_21.1 | -                        |
| GF003655 | 0                               | 1                        | 1                        | Hypothetical protein (1)                                                   | -                                                                                                                                                                                                                                                                                                                 | -                                                                                                                                                                                                                                                                                                                                                                                   | -                               | C_unihub_00259_mRNA_6.1  | -                        |
| GF003654 | 0                               | 1                        | 1                        | Hypothetical protein (1)                                                   | -                                                                                                                                                                                                                                                                                                                 | -                                                                                                                                                                                                                                                                                                                                                                                   | -                               | C_unihub_00259_mRNA_26.1 | -                        |
| GF003653 | 0                               | 1                        | 1                        | Hypothetical protein (1)                                                   | cysteine-type peptidase activity [GO:0008234 molecular_function] (1); proteolysis [GO:0006508 biological_process] (1)                                                                                                                                                                                             | Ulp1 protease family, C-terminal catalytic domain [IPRO03653] (1)                                                                                                                                                                                                                                                                                                                   | -                               | C_unihub_00259_mRNA_23.1 | -                        |
| GF003652 | 0                               | 1                        | 1                        | Hypothetical protein (1)                                                   | -                                                                                                                                                                                                                                                                                                                 | -                                                                                                                                                                                                                                                                                                                                                                                   | -                               | C_unihub_00259_mRNA_21.1 | -                        |
| GF003651 | 0                               | 1                        | 1                        | Hypothetical protein (1)                                                   | -                                                                                                                                                                                                                                                                                                                 | Aminotransferase-like, plant mobile domain [IPRO19571] (1)                                                                                                                                                                                                                                                                                                                          | -                               | C_unihub_00259_mRNA_19.1 | -                        |
| GF003650 | 0                               | 1                        | 1                        | Hypothetical protein (1)                                                   | HAUS complex [GO:0070652 cellular_component] (1); spindle assembly [GO:0051225 biological_process] (1)                                                                                                                                                                                                            | HAUS augmin-like complex subunit 3 [IPRO26206] (1); FARA1 DNA binding domain [IPRO04330] (1)                                                                                                                                                                                                                                                                                        | -                               | C_unihub_00259_mRNA_14.1 | -                        |
| GF003649 | 0                               | 1                        | 1                        | Hypothetical protein (1)                                                   | cysteine-type peptidase activity [GO:0008234 molecular_function] (1); proteolysis [GO:0006508 biological_process] (1)                                                                                                                                                                                             | Ulp1 protease family, C-terminal catalytic domain [IPRO03653] (1)                                                                                                                                                                                                                                                                                                                   | -                               | C_unihub_00258_mRNA_8.1  | -                        |
| GF003648 | 0                               | 1                        | 1                        | Hypothetical protein (1)                                                   | -                                                                                                                                                                                                                                                                                                                 | -                                                                                                                                                                                                                                                                                                                                                                                   | -                               | C_unihub_00258_mRNA_7.1  | -                        |
| GF003647 | 0                               | 1                        | 1                        | Hypothetical protein (1)                                                   | -                                                                                                                                                                                                                                                                                                                 | Endonuclease/exonuclease/phosphatase [IPRO0135] (4)                                                                                                                                                                                                                                                                                                                                 | -                               | C_unihub_00258_mRNA_5.1  | -                        |
| GF003646 | 0                               | 1                        | 1                        | Hypothetical protein (1)                                                   | -                                                                                                                                                                                                                                                                                                                 | -                                                                                                                                                                                                                                                                                                                                                                                   | -                               | C_unihub_00258_mRNA_42.1 | -                        |
| GF003645 | 0                               | 1                        | 1                        | Hypothetical protein (1)                                                   | -                                                                                                                                                                                                                                                                                                                 | -                                                                                                                                                                                                                                                                                                                                                                                   | -                               | C_unihub_00258_mRNA_41.1 | -                        |
| GF003644 | 0                               | 1                        | 1                        | Hypothetical protein (1)                                                   | -                                                                                                                                                                                                                                                                                                                 | -                                                                                                                                                                                                                                                                                                                                                                                   | -                               | C_unihub_00258_mRNA_4.1  | -                        |
| GF003643 | 0                               | 1                        | 1                        | Hypothetical protein (1)                                                   | -                                                                                                                                                                                                                                                                                                                 | -                                                                                                                                                                                                                                                                                                                                                                                   | -                               | C_unihub_00258_mRNA_36.1 | -                        |
| GF003642 | 0                               | 1                        | 1                        | Polymyxin(B) transferase, Ribonuclease H 64h (1)                           | -                                                                                                                                                                                                                                                                                                                 | Reverse transcriptase zinc-binding domain [IPRO26960] (1); Lysine-rich repeat domain, L domain-like [IPRO32675] (1)                                                                                                                                                                                                                                                                 | -                               | C_unihub_00258_mRNA_2.1  | -                        |
| GF003641 | 0                               | 1                        | 1                        | Hypothetical protein (1)                                                   | -                                                                                                                                                                                                                                                                                                                 | -                                                                                                                                                                                                                                                                                                                                                                                   | -                               | C_unihub_00258_mRNA_16.1 | -                        |
| GF003640 | 0                               | 1                        | 1                        | Hypothetical protein (1)                                                   | -                                                                                                                                                                                                                                                                                                                 | -                                                                                                                                                                                                                                                                                                                                                                                   | -                               | C_unihub_00257_mRNA_8.1  | -                        |
| GF003639 | 0                               | 1                        | 1                        | Hypothetical protein (1)                                                   | -                                                                                                                                                                                                                                                                                                                 | -                                                                                                                                                                                                                                                                                                                                                                                   | -                               | C_unihub_00257_mRNA_7.1  | -                        |
| GF003638 | 0                               | 1                        | 1                        | Hypothetical protein (1)                                                   | -                                                                                                                                                                                                                                                                                                                 | -                                                                                                                                                                                                                                                                                                                                                                                   | -                               | C_unihub_00257_mRNA_5.1  | -                        |
| GF003637 | 0                               | 1                        | 1                        | Putative tmDR family transposase-like                                      | zinc ion binding [GO:0008270 molecular_function] (1); transposition, DNA-mediated [GO:0000313 biological_process] (1); transposase activity [GO:0004803 molecular_function] (1); DNA binding [GO:0003677 molecular_function] (1)                                                                                  | Zinc finger, SWIM-type [IPRO07527] (1); Transposase, MuDR, plant [IPRO04322] (1); Transposase, mutator type [IPRO01207] (1); MULE transposase domain [IPRO05891] (1); Zinc finger, PMZ-type [IPRO06564] (1)                                                                                                                                                                         | -                               | C_unihub_00257_mRNA_4.1  | -                        |
| GF003636 | 0                               | 1                        | 1                        | Steric alpha motif domain-containing protein 9-like protein (1)            | -                                                                                                                                                                                                                                                                                                                 | -                                                                                                                                                                                                                                                                                                                                                                                   | -                               | C_unihub_00257_mRNA_3.1  | -                        |
| GF003635 | 0                               | 1                        | 1                        | Hypothetical protein (1)                                                   | -                                                                                                                                                                                                                                                                                                                 | -                                                                                                                                                                                                                                                                                                                                                                                   | -                               | C_unihub_00257_mRNA_21.1 | -                        |
| GF003634 | 0                               | 1                        | 1                        | Hypothetical protein (1)                                                   | -                                                                                                                                                                                                                                                                                                                 | -                                                                                                                                                                                                                                                                                                                                                                                   | -                               | C_unihub_00257_mRNA_18.1 | -                        |
| GF003633 | 0                               | 1                        | 1                        | Hypothetical protein (1)                                                   | nucleic acid binding [GO:0003676 molecular_function] (1)                                                                                                                                                                                                                                                          | Ribonuclease H-like domain [IPRO12337] (1)                                                                                                                                                                                                                                                                                                                                          | -                               | C_unihub_00257_mRNA_17.1 | -                        |
| GF003632 | 0                               | 1                        | 1                        | Hypothetical protein (1)                                                   | -                                                                                                                                                                                                                                                                                                                 | -                                                                                                                                                                                                                                                                                                                                                                                   | -                               | C_unihub_00257_mRNA_13.1 | -                        |
| GF003631 | 0                               | 1                        | 1                        | Hypothetical protein (1)                                                   | protein dimerization activity [GO:0046983 molecular_function] (1); nucleic acid binding [GO:0003676 molecular_function] (1)                                                                                                                                                                                       | HAT, C-terminal dimerization domain [IPRO08906] (1); Ribonuclease H-like domain [IPRO12337] (1)                                                                                                                                                                                                                                                                                     | -                               | C_unihub_00257_mRNA_11.1 | -                        |
| GF003630 | 0                               | 1                        | 1                        | TIR domain protein (1)                                                     | -                                                                                                                                                                                                                                                                                                                 | -                                                                                                                                                                                                                                                                                                                                                                                   | -                               | C_unihub_00256_mRNA_9.1  | -                        |
| GF003629 | 0                               | 1                        | 1                        | Hypothetical protein (1)                                                   | -                                                                                                                                                                                                                                                                                                                 | -                                                                                                                                                                                                                                                                                                                                                                                   | -                               | C_unihub_00256_mRNA_30.1 | -                        |
| GF003628 | 0                               | 1                        | 1                        | Hypothetical protein (1)                                                   | -                                                                                                                                                                                                                                                                                                                 | -                                                                                                                                                                                                                                                                                                                                                                                   | -                               | C_unihub_00256_mRNA_25.1 | -                        |
| GF003627 | 0                               | 1                        | 1                        | GDSL-like Lipase-Acylhydrolase superfamily protein, putative isoform 2 (1) | -                                                                                                                                                                                                                                                                                                                 | SGNH hydrolase-type esterase domain [IPRO13830] (1)                                                                                                                                                                                                                                                                                                                                 | -                               | C_unihub_00256_mRNA_22.1 | -                        |
| GF003626 | 0                               | 1                        | 1                        | Hypothetical protein (1)                                                   | transport [GO:0006810 biological_process] (1)                                                                                                                                                                                                                                                                     | Longin-like domain [IPRO11012] (1)                                                                                                                                                                                                                                                                                                                                                  | -                               | C_unihub_00256_mRNA_21.1 | -                        |
| GF003625 | 0                               | 1                        | 1                        | Hypothetical protein (1)                                                   | -                                                                                                                                                                                                                                                                                                                 | -                                                                                                                                                                                                                                                                                                                                                                                   | -                               | C_unihub_00256_mRNA_17.1 | -                        |
| GF003624 | 0                               | 1                        | 1                        | Caffeic acid 3-O-methyltransferase (1)                                     | -                                                                                                                                                                                                                                                                                                                 | -                                                                                                                                                                                                                                                                                                                                                                                   | -                               | C_unihub_00256_mRNA_1.1  | -                        |
| GF003623 | 0                               | 1                        | 1                        | Leguminosin group-485 secreted peptide (1)                                 | -                                                                                                                                                                                                                                                                                                                 | -                                                                                                                                                                                                                                                                                                                                                                                   | -                               | C_unihub_00255_mRNA_6.1  | -                        |
| GF003622 | 0                               | 1                        | 1                        | Putative MATE efflux family protein (1)                                    | drug transmembrane transport [GO:0006855 biological_process] (1); membrane [GO:0016020 cellular_component] (1); antiporter activity [GO:0015297 molecular_function] (1); drug transmembrane transporter activity [GO:0015238 molecular_function] (1); transmembrane transport [GO:0055085 biological_process] (1) | Multi antimicrobial extrusion protein [IPRO02528] (4)                                                                                                                                                                                                                                                                                                                               | -                               | C_unihub_00255_mRNA_38.1 | -                        |
| GF003621 | 0                               | 1                        | 1                        | Hypothetical protein (1)                                                   | -                                                                                                                                                                                                                                                                                                                 | -                                                                                                                                                                                                                                                                                                                                                                                   | -                               | C_unihub_00255_mRNA_30.1 | -                        |
| GF003620 | 0                               | 1                        | 1                        | 14-3-3-like protein GF14 kappa (1)                                         | protein domain specific binding [GO:0019904 molecular_function] (1)                                                                                                                                                                                                                                               | 14-3-3 protein [IPRO0308] (1); 14-3-3 protein, conserved site [IPRO23409] (1); 14-3-3 domain [IPRO23410] (1)                                                                                                                                                                                                                                                                        | -                               | C_unihub_00255_mRNA_22.1 | -                        |
| GF003619 | 0                               | 1                        | 1                        | Hypothetical protein (1)                                                   | -                                                                                                                                                                                                                                                                                                                 | -                                                                                                                                                                                                                                                                                                                                                                                   | -                               | C_unihub_00255_mRNA_21.1 | -                        |
| GF003618 | 0                               | 1                        | 1                        | Hypothetical protein (1)                                                   | -                                                                                                                                                                                                                                                                                                                 | Domain of unknown function DUF1985 [IPRO15410] (1)                                                                                                                                                                                                                                                                                                                                  | -                               | C_unihub_00255_mRNA_20.1 | -                        |
| GF003617 | 0                               | 1                        | 1                        | Ribonuclease H-like superfamily protein (1)                                | nucleic acid binding [GO:0003676 molecular_function] (1)                                                                                                                                                                                                                                                          | Reverse transcriptase zinc-binding domain [IPRO26960] (1); Ribonuclease H-like domain [IPRO12337] (1)                                                                                                                                                                                                                                                                               | -                               | C_unihub_00254_mRNA_7.1  | -                        |
| GF003616 | 0                               | 1                        | 1                        | Hypothetical protein (1)                                                   | heme binding [GO:002037 molecular_function] (1); iron ion binding [GO:005506 molecular_function] (1); oxidoreductase activity, acting on paired donors, with incorporation or reduction of molecular oxygen [GO:0016705 molecular_function] (1); oxidation-reduction process [GO:0055114 biological_process] (1)  | Cytochrome P450 [IPRO01128] (1); Cytochrome P450, E-class, group I [IPRO02401] (1); Cytochrome P450, conserved site [IPRO17972] (1)                                                                                                                                                                                                                                                 | -                               | C_unihub_00253_mRNA_40.2 | -                        |
| GF003615 | 0                               | 1                        | 1                        | Hypothetical protein (1)                                                   | -                                                                                                                                                                                                                                                                                                                 | P-loop containing nucleoside triphosphate hydrolase [IPRO27417] (1)                                                                                                                                                                                                                                                                                                                 | -                               | C_unihub_00253_mRNA_30.1 | -                        |
| GF003614 | 0                               | 1                        | 1                        | Hypothetical protein (1)                                                   | binding [GO:0005488 molecular_function] (1)                                                                                                                                                                                                                                                                       | E3 ubiquitin ligase, UBR4 [IPRO25704] (1); Anomallo-type fold [IPRO16024] (1)                                                                                                                                                                                                                                                                                                       | -                               | C_unihub_00253_mRNA_3.1  | -                        |
| GF003613 | 0                               | 1                        | 1                        | Hypothetical protein (1)                                                   | -                                                                                                                                                                                                                                                                                                                 | -                                                                                                                                                                                                                                                                                                                                                                                   | -                               | C_unihub_00252_mRNA_9.1  | -                        |
| GF003612 | 0                               | 1                        | 1                        | Hypothetical protein (1)                                                   | -                                                                                                                                                                                                                                                                                                                 | -                                                                                                                                                                                                                                                                                                                                                                                   | -                               | C_unihub_00252_mRNA_42.1 | -                        |
| GF003611 | 0                               | 1                        | 1                        | dNARNAs polymerases superfamily protein (1)                                | -                                                                                                                                                                                                                                                                                                                 | -                                                                                                                                                                                                                                                                                                                                                                                   | -                               | C_unihub_00252_mRNA_41.1 | -                        |
| GF003610 | 0                               | 1                        | 1                        | Wall-associated receptor kinase 2 (1)                                      | polysaccharide binding [GO:0030247 molecular_function] (1); ATP binding [GO:0005224 molecular_function] (1); protein phosphorylation [GO:0006468 biological_process] (1); protein kinase activity [GO:0004672 molecular_function] (1)                                                                             | Serine/threonine protein kinase, active site [IPRO08271] (1); Serine/threonine dual specificity protein kinase, catalytic domain [IPRO0250] (1); Protein kinase domain [IPRO0019] (1); Protein kinase-like domain [IPRO11099] (1); Concentrator A-like lectin/glycanase domain [IPRO13320] (1); Wall-associated receptor kinase, glycosyltransferase-binding domain [IPRO25257] (1) | -                               | C_unihub_00252_mRNA_39.1 | -                        |
| GF003609 | 0                               | 1                        | 1                        | Hypothetical protein (1)                                                   | -                                                                                                                                                                                                                                                                                                                 | -                                                                                                                                                                                                                                                                                                                                                                                   | -                               | C_unihub_00252_mRNA_37.1 | -                        |
| GF003608 | 0                               | 1                        | 1                        | Hypothetical protein (1)                                                   | -                                                                                                                                                                                                                                                                                                                 | -                                                                                                                                                                                                                                                                                                                                                                                   | -                               | C_unihub_00252_mRNA_35.1 | -                        |
| GF003607 | 0                               | 1                        | 1                        | Hypothetical protein (1)                                                   | -                                                                                                                                                                                                                                                                                                                 | -                                                                                                                                                                                                                                                                                                                                                                                   | -                               | C_unihub_00252_mRNA_23.1 | -                        |
| GF003606 | 0                               | 1                        | 1                        | Hypothetical protein (1)                                                   | carbohydrate metabolic process [GO:0005979 biological_process] (1); catalytic activity [GO:0003824 molecular_function] (1); hydrolase activity, hydrolyzing O-phospho compound [GO:0004553 molecular_function] (1)                                                                                                | Glycoside hydrolase family 9 [IPRO01701] (1); Six-hairpin glycosidase-like [IPRO09028] (1); Six-hairpin glycosidase [IPRO12341] (1); Glycoside hydrolase family 9, His active site [IPRO18211] (1)                                                                                                                                                                                  | -                               | C_unihub_00252_mRNA_21.1 | -                        |
| GF003605 | 0                               | 1                        | 1                        | Heat stress transcription factor B-2b (1)                                  | -                                                                                                                                                                                                                                                                                                                 | Heat shock transcription factor family [IPRO2725] (1)                                                                                                                                                                                                                                                                                                                               | -                               | C_unihub_00252_mRNA_19.1 | -                        |
| GF003604 | 0                               | 1                        | 1                        | 21 kDa protein (1)                                                         | enzyme inhibitor activity [GO:0004857 molecular_function] (1)                                                                                                                                                                                                                                                     | Proteinase inhibitor domain [IPRO06901] (1)                                                                                                                                                                                                                                                                                                                                         | -                               | C_unihub_00252_mRNA_17.1 | -                        |
| GF003603 | 0                               | 1                        | 1                        | Hypothetical protein (1)                                                   | -                                                                                                                                                                                                                                                                                                                 | -                                                                                                                                                                                                                                                                                                                                                                                   | -                               | C_unihub_00251_mRNA_30.1 | -                        |
| GF003602 | 0                               | 1                        | 1                        | Hypothetical protein (1)                                                   | zinc ion binding [GO:0008270 molecular_function] (1); nucleic acid binding [GO:0003676 molecular_function] (1)                                                                                                                                                                                                    | Zinc finger, CCHC-type [IPRO011878] (4)                                                                                                                                                                                                                                                                                                                                             | -                               | C_unihub_00251_mRNA_29.1 | -                        |
| GF003601 | 0                               | 1                        | 1                        | Polymyxin(B) transferase, Ribonuclease H-like superfamily protein (1)      | nucleic acid binding [GO:0003676 molecular_function] (1)                                                                                                                                                                                                                                                          | Ribonuclease H-like domain [IPRO12337] (1); Reverse transcriptase zinc-binding domain [IPRO26960] (1)                                                                                                                                                                                                                                                                               | -                               | C_unihub_00251_mRNA_20.1 | -                        |
| GF003600 | 0                               | 1                        | 1                        | Hypothetical protein (1)                                                   | protein serine/threonine phosphatase activity [GO:0004722 molecular_function] (1); protein dephosphorylation [GO:0006470 biological_process] (1)                                                                                                                                                                  | Protein phosphatase 2C family [IPRO15655] (4)                                                                                                                                                                                                                                                                                                                                       | -                               | C_unihub_00251_mRNA_18.1 | -                        |
| GF003599 | 0                               | 1                        | 1                        | MD-2-related lipid recognition domain-containing family protein (1)        | -                                                                                                                                                                                                                                                                                                                 | Immunoglobulin E-set [IPRO14756] (1); MD-2-related lipid-recognition domain [IPRO03172] (4)                                                                                                                                                                                                                                                                                         | -                               | C_unihub_00251_mRNA_16.1 | -                        |
| GF003598 | 0                               | 1                        | 1                        | MD-like lipid recognition domain protein/ML domain protein (1)             | -                                                                                                                                                                                                                                                                                                                 | Immunoglobulin E-set [IPRO14756] (1); MD-2-related lipid-recognition domain [IPRO03172] (4)                                                                                                                                                                                                                                                                                         | -                               | C_unihub_00251_mRNA_15.1 | -                        |
| GF003597 | 0                               | 1                        | 1                        | Hypothetical protein (1)                                                   | -                                                                                                                                                                                                                                                                                                                 | -                                                                                                                                                                                                                                                                                                                                                                                   | -                               | C_unihub_00251_mRNA_11.1 | -                        |
| GF003596 | 0                               | 1                        | 1                        | Hypothetical protein (1)                                                   | protein binding [GO:0005515 molecular_function] (1)                                                                                                                                                                                                                                                               | Leucine-rich repeat-containing N-terminal, plant-type [IPRO13210] (1); Leucine-rich repeat [IPRO16111] (1); Leucine-rich repeat domain, L domain-like [IPRO2675] (1)                                                                                                                                                                                                                | -                               | C_unihub_00251_mRNA_1.1  | -                        |
| GF003595 | 0                               | 1                        | 1                        | Hypothetical protein (1)                                                   | nucleic acid binding [GO:0003676 molecular_function] (1); RNA-DNA hybrid ribonuclease activity [GO:0004525 molecular_function] (1)                                                                                                                                                                                | Ribonuclease H domain [IPRO02156] (1); Ribonuclease H-like domain [IPRO12337] (1)                                                                                                                                                                                                                                                                                                   | -                               | C_unihub_00250_mRNA_4.1  | -                        |

| ID        | Num. in C. ebraense | Num. in C. acaulis | Num. in P. trifidatus | Name                                                                                             | GO                                                                                                                                                                                                                                                                                                                          | InterPro                                                                                                                                                                                                                                          | Members in C. ebraense | Members in C. acaulis    | Members in P. trifidatus |
|-----------|---------------------|--------------------|-----------------------|--------------------------------------------------------------------------------------------------|-----------------------------------------------------------------------------------------------------------------------------------------------------------------------------------------------------------------------------------------------------------------------------------------------------------------------------|---------------------------------------------------------------------------------------------------------------------------------------------------------------------------------------------------------------------------------------------------|------------------------|--------------------------|--------------------------|
| GF0035994 | 0                   | 1                  | 0                     | Hypothetical protein (1)                                                                         | regulation of transcription, DNA-scraping [GO:0006355 biological_process] (1)                                                                                                                                                                                                                                               | FHY3/FAR1 family [IPR01052] (1); MLE transposase domain [IPR018289] (1)                                                                                                                                                                           | -                      | C_unihir_00250_mRNA_35.1 | -                        |
| GF0035993 | 0                   | 1                  | 0                     | Hypothetical protein (1)                                                                         | -                                                                                                                                                                                                                                                                                                                           | Reverse transcriptase domain [IPR00471] (1)                                                                                                                                                                                                       | -                      | C_unihir_00250_mRNA_23.1 | -                        |
| GF0035992 | 0                   | 1                  | 0                     | Hypothetical protein (1)                                                                         | nucleic acid binding [GO:0003676 molecular_function] (1)                                                                                                                                                                                                                                                                    | Ribonuclease H-like domain [IPR012337] (1)                                                                                                                                                                                                        | -                      | C_unihir_00250_mRNA_20.1 | -                        |
| GF0035991 | 0                   | 1                  | 0                     | Hypothetical protein (1)                                                                         | -                                                                                                                                                                                                                                                                                                                           | -                                                                                                                                                                                                                                                 | -                      | C_unihir_00250_mRNA_2.1  | -                        |
| GF0035990 | 0                   | 1                  | 0                     | Hypothetical protein (1)                                                                         | -                                                                                                                                                                                                                                                                                                                           | -                                                                                                                                                                                                                                                 | -                      | C_unihir_00250_mRNA_17.1 | -                        |
| GF0035989 | 0                   | 1                  | 0                     | Hypothetical protein (1)                                                                         | -                                                                                                                                                                                                                                                                                                                           | -                                                                                                                                                                                                                                                 | -                      | C_unihir_00250_mRNA_16.1 | -                        |
| GF0035988 | 0                   | 1                  | 0                     | Hypothetical protein (1)                                                                         | -                                                                                                                                                                                                                                                                                                                           | -                                                                                                                                                                                                                                                 | -                      | C_unihir_00250_mRNA_11.1 | -                        |
| GF0035987 | 0                   | 1                  | 0                     | Hypothetical protein (1)                                                                         | -                                                                                                                                                                                                                                                                                                                           | 10TM putative phosphate transporter, cytosolic domain [IPR027815] (1)                                                                                                                                                                             | -                      | C_unihir_00249_mRNA_45.1 | -                        |
| GF0035986 | 0                   | 1                  | 0                     | ERD (Early responsive to dehydration stress) family protein isoform 3 (1)                        | membrane [GO:0016020 cellular_component] (1)                                                                                                                                                                                                                                                                                | 10TM putative phosphate transporter, cytosolic domain [IPR027815] (1); Calcium-dependent channel, TM region, putative phosphate [IPR003864] (1); Calcium permeable stress-gated cation channel 1, N-terminal transmembrane domain [IPR022880] (1) | -                      | C_unihir_00249_mRNA_44.1 | -                        |
| GF0035985 | 0                   | 1                  | 0                     | Hypothetical protein (1)                                                                         | -                                                                                                                                                                                                                                                                                                                           | 10TM putative phosphate transporter, cytosolic domain [IPR027815] (1); Calcium permeable stress-gated cation channel 1, N-terminal transmembrane domain [IPR022880] (1)                                                                           | -                      | C_unihir_00249_mRNA_43.1 | -                        |
| GF0035984 | 0                   | 1                  | 0                     | Hypothetical protein (1)                                                                         | -                                                                                                                                                                                                                                                                                                                           | -                                                                                                                                                                                                                                                 | -                      | C_unihir_00249_mRNA_39.1 | -                        |
| GF0035983 | 0                   | 1                  | 0                     | Hypothetical protein (1)                                                                         | -                                                                                                                                                                                                                                                                                                                           | -                                                                                                                                                                                                                                                 | -                      | C_unihir_00249_mRNA_2.1  | -                        |
| GF0035982 | 0                   | 1                  | 0                     | Hypothetical protein (1)                                                                         | -                                                                                                                                                                                                                                                                                                                           | -                                                                                                                                                                                                                                                 | -                      | C_unihir_00249_mRNA_14.1 | -                        |
| GF0035981 | 0                   | 1                  | 0                     | Disease resistance protein (1)                                                                   | ADP binding [GO:0043531 molecular_function] (1)                                                                                                                                                                                                                                                                             | NB-ARC [IPR02182] (1); P-loop containing nucleoside triphosphate hydrolase [IPR027417] (1)                                                                                                                                                        | -                      | C_unihir_00249_mRNA_11.1 | -                        |
| GF0035980 | 0                   | 1                  | 0                     | Non-LTR reverse transcriptase (1)                                                                | -                                                                                                                                                                                                                                                                                                                           | Endonuclease/exonuclease/phosphatase [IPR00515] (4)                                                                                                                                                                                               | -                      | C_unihir_00249_mRNA_10.1 | -                        |
| GF0035979 | 0                   | 1                  | 0                     | Bifunctional inhibitor/lipid-transfer protein/seed storage 2S albumin superfamily protein (1)    | -                                                                                                                                                                                                                                                                                                                           | Hydrophobic seed protein [IPR027923] (1); Bifunctional inhibitor/plant lipid transfer protein/seed storage helical domain [IPR016140] (1)                                                                                                         | -                      | C_unihir_00248_mRNA_37.1 | -                        |
| GF0035978 | 0                   | 1                  | 0                     | Bimodular protein (1)                                                                            | -                                                                                                                                                                                                                                                                                                                           | Bifunctional inhibitor/plant lipid transfer protein/seed storage helical domain [IPR016140] (1); Hydrophobic seed protein [IPR027923] (1)                                                                                                         | -                      | C_unihir_00248_mRNA_36.1 | -                        |
| GF0035977 | 0                   | 1                  | 0                     | Hypothetical protein (1)                                                                         | -                                                                                                                                                                                                                                                                                                                           | Bifunctional inhibitor/plant lipid transfer protein/seed storage helical domain [IPR016140] (1); Hydrophobic seed protein [IPR027923] (1)                                                                                                         | -                      | C_unihir_00248_mRNA_34.1 | -                        |
| GF0035976 | 0                   | 1                  | 0                     | Hypothetical protein (1)                                                                         | -                                                                                                                                                                                                                                                                                                                           | Transposase, MuDR, plant [IPR004332] (1)                                                                                                                                                                                                          | -                      | C_unihir_00248_mRNA_31.1 | -                        |
| GF0035975 | 0                   | 1                  | 0                     | Hypothetical protein (1)                                                                         | -                                                                                                                                                                                                                                                                                                                           | -                                                                                                                                                                                                                                                 | -                      | C_unihir_00248_mRNA_3.1  | -                        |
| GF0035974 | 0                   | 1                  | 0                     | Zinc transporter 5 (1)                                                                           | metal ion transmembrane transporter activity [GO:0046873 molecular_function] (1); metal ion transport [GO:0006901 biological_process] (1); transmembrane transport [GO:0055885 biological_process] (1); membrane [GO:0016020 cellular_component] (1)                                                                        | Zinc/iron permease [IPR033689] (1)                                                                                                                                                                                                                | -                      | C_unihir_00248_mRNA_27.1 | -                        |
| GF0035973 | 0                   | 1                  | 0                     | Hypothetical protein (1)                                                                         | -                                                                                                                                                                                                                                                                                                                           | Leucine-rich repeat domain, L domain-like [IPR026275] (1)                                                                                                                                                                                         | -                      | C_unihir_00247_mRNA_36.1 | -                        |
| GF0035972 | 0                   | 1                  | 0                     | Hypothetical protein (1)                                                                         | -                                                                                                                                                                                                                                                                                                                           | -                                                                                                                                                                                                                                                 | -                      | C_unihir_00247_mRNA_32.1 | -                        |
| GF0035971 | 0                   | 1                  | 0                     | Hypothetical protein (1)                                                                         | protein binding [GO:0005515 molecular_function] (1)                                                                                                                                                                                                                                                                         | Ankyrin repeat-containing domain [IPR026083] (1); Ankyrin repeat [IPR002110] (1)                                                                                                                                                                  | -                      | C_unihir_00247_mRNA_28.1 | -                        |
| GF0035970 | 0                   | 1                  | 0                     | Hypothetical protein (1)                                                                         | -                                                                                                                                                                                                                                                                                                                           | -                                                                                                                                                                                                                                                 | -                      | C_unihir_00247_mRNA_27.1 | -                        |
| GF0035969 | 0                   | 1                  | 0                     | 5-methyltetrahydropteroylglutamate-homocysteine S-methyltransferase (1)                          | cellular amino acid biosynthetic process [GO:0006032 biological_process] (1); zinc ion binding [GO:0008270 molecular_function] (1); methionine biosynthetic process [GO:0006986 biological_process] (1); S-5-methyltetrahydropteroylglutamate-homocysteine S-methyltransferase activity [GO:0003871 molecular_function] (1) | Cobalamin-independent methionine synthase MetE, C-terminal/archaeal [IPR002629] (1); Cobalamin-independent methionine synthase MetE, N-terminal [IPR013215] (1)                                                                                   | -                      | C_unihir_00247_mRNA_26.1 | -                        |
| GF0035968 | 0                   | 1                  | 0                     | Hypothetical protein (1)                                                                         | -                                                                                                                                                                                                                                                                                                                           | -                                                                                                                                                                                                                                                 | -                      | C_unihir_00246_mRNA_36.1 | -                        |
| GF0035967 | 0                   | 1                  | 0                     | Hypothetical protein (1)                                                                         | -                                                                                                                                                                                                                                                                                                                           | -                                                                                                                                                                                                                                                 | -                      | C_unihir_00246_mRNA_34.1 | -                        |
| GF0035966 | 0                   | 1                  | 0                     | Hypothetical protein (1)                                                                         | zinc ion binding [GO:0008270 molecular_function] (1)                                                                                                                                                                                                                                                                        | Zinc finger, SWIM-type [IPR007527] (1); Domain of unknown function DJF4219 [IPR025314] (1); Transposase, MuDR, plant [IPR004332] (1); Zinc finger, PAMZ-type [IPR006564] (1)                                                                      | -                      | C_unihir_00246_mRNA_33.1 | -                        |
| GF0035965 | 0                   | 1                  | 0                     | Hypothetical protein (1)                                                                         | zinc ion binding [GO:0008270 molecular_function] (1)                                                                                                                                                                                                                                                                        | Zinc finger, GRF-type [IPR010660] (1)                                                                                                                                                                                                             | -                      | C_unihir_00246_mRNA_32.1 | -                        |
| GF0035964 | 0                   | 1                  | 0                     | Hypothetical protein (1)                                                                         | -                                                                                                                                                                                                                                                                                                                           | -                                                                                                                                                                                                                                                 | -                      | C_unihir_00246_mRNA_31.1 | -                        |
| GF0035963 | 0                   | 1                  | 0                     | Hypothetical protein (1)                                                                         | -                                                                                                                                                                                                                                                                                                                           | -                                                                                                                                                                                                                                                 | -                      | C_unihir_00246_mRNA_1.1  | -                        |
| GF0035962 | 0                   | 1                  | 0                     | Hypothetical protein (1)                                                                         | protein binding [GO:0005515 molecular_function] (1); ADP binding [GO:0043531 molecular_function] (1)                                                                                                                                                                                                                        | P-loop containing nucleoside triphosphate hydrolase [IPR027417] (1); NB-ARC [IPR02182] (1); Leucine-rich repeat [IPR00161] (1); Leucine-rich repeat domain, L domain-like [IPR026275] (1); Leucine-rich repeat, typical subtype [IPR003591] (1)   | -                      | C_unihir_00245_mRNA_8.1  | -                        |
| GF0035961 | 0                   | 1                  | 0                     | Sister chromatid cohesion protein PDS5 (1)                                                       | binding [GO:0005488 molecular_function] (1)                                                                                                                                                                                                                                                                                 | Armadillo-type fold [IPR016024] (1)                                                                                                                                                                                                               | -                      | C_unihir_00245_mRNA_6.1  | -                        |
| GF0035960 | 0                   | 1                  | 0                     | Hypothetical protein (1)                                                                         | -                                                                                                                                                                                                                                                                                                                           | -                                                                                                                                                                                                                                                 | -                      | C_unihir_00245_mRNA_3.1  | -                        |
| GF0035959 | 0                   | 1                  | 0                     | Putative muDR family transposase-like (1)                                                        | zinc ion binding [GO:0008270 molecular_function] (1)                                                                                                                                                                                                                                                                        | MULE transposase domain [IPR018289] (1); Zinc finger, PAMZ-type [IPR006564] (1); Zinc finger, SWIM-type [IPR007527] (1)                                                                                                                           | -                      | C_unihir_00245_mRNA_28.1 | -                        |
| GF0035958 | 0                   | 1                  | 0                     | Hypothetical protein (1)                                                                         | -                                                                                                                                                                                                                                                                                                                           | -                                                                                                                                                                                                                                                 | -                      | C_unihir_00245_mRNA_24.1 | -                        |
| GF0035957 | 0                   | 1                  | 0                     | Hypothetical protein (1)                                                                         | -                                                                                                                                                                                                                                                                                                                           | -                                                                                                                                                                                                                                                 | -                      | C_unihir_00245_mRNA_20.1 | -                        |
| GF0035956 | 0                   | 1                  | 0                     | Hypothetical protein (1)                                                                         | -                                                                                                                                                                                                                                                                                                                           | -                                                                                                                                                                                                                                                 | -                      | C_unihir_00245_mRNA_17.1 | -                        |
| GF0035955 | 0                   | 1                  | 0                     | Cytochrome P450 71A1 (1)                                                                         | oxidoreductase activity, acting on paired donors, with incorporation or reduction of molecular oxygen [GO:0016765 molecular_function] (1); oxidation-reduction process [GO:0005514 biological_process] (1); heme binding [GO:0000037 molecular_function] (1); iron ion binding [GO:0005506 molecular_function] (1)          | Cytochrome P450 [IPR001128] (1); Cytochrome P450, E-class, group I [IPR02401] (4)                                                                                                                                                                 | -                      | C_unihir_00245_mRNA_15.1 | -                        |
| GF0035954 | 0                   | 1                  | 0                     | Hypothetical protein (1)                                                                         | -                                                                                                                                                                                                                                                                                                                           | -                                                                                                                                                                                                                                                 | -                      | C_unihir_00245_mRNA_11.1 | -                        |
| GF0035953 | 0                   | 1                  | 0                     | Cytochrome P450 76AD1-like protein (1)                                                           | -                                                                                                                                                                                                                                                                                                                           | -                                                                                                                                                                                                                                                 | -                      | C_unihir_00244_mRNA_4.1  | -                        |
| GF0035952 | 0                   | 1                  | 0                     | Hypothetical protein (1)                                                                         | -                                                                                                                                                                                                                                                                                                                           | -                                                                                                                                                                                                                                                 | -                      | C_unihir_00244_mRNA_32.1 | -                        |
| GF0035951 | 0                   | 1                  | 0                     | Hypothetical protein (1)                                                                         | -                                                                                                                                                                                                                                                                                                                           | -                                                                                                                                                                                                                                                 | -                      | C_unihir_00244_mRNA_3.1  | -                        |
| GF0035950 | 0                   | 1                  | 0                     | Hypothetical protein (1)                                                                         | -                                                                                                                                                                                                                                                                                                                           | -                                                                                                                                                                                                                                                 | -                      | C_unihir_00244_mRNA_28.1 | -                        |
| GF0035949 | 0                   | 1                  | 0                     | Hypothetical protein (1)                                                                         | -                                                                                                                                                                                                                                                                                                                           | -                                                                                                                                                                                                                                                 | -                      | C_unihir_00244_mRNA_19.1 | -                        |
| GF0035948 | 0                   | 1                  | 0                     | Hypothetical protein (1)                                                                         | -                                                                                                                                                                                                                                                                                                                           | -                                                                                                                                                                                                                                                 | -                      | C_unihir_00244_mRNA_18.1 | -                        |
| GF0035947 | 0                   | 1                  | 0                     | Hypothetical protein (1)                                                                         | ADP binding [GO:0043531 molecular_function] (1)                                                                                                                                                                                                                                                                             | Leucine-rich repeat domain, L domain-like [IPR026275] (1); P-loop containing nucleoside triphosphate hydrolase [IPR027417] (1); NB-ARC [IPR02182] (1)                                                                                             | -                      | C_unihir_00244_mRNA_15.1 | -                        |
| GF0035946 | 0                   | 1                  | 0                     | Hypothetical protein (1)                                                                         | -                                                                                                                                                                                                                                                                                                                           | -                                                                                                                                                                                                                                                 | -                      | C_unihir_00244_mRNA_14.1 | -                        |
| GF0035945 | 0                   | 1                  | 0                     | S-adenosyl-L-methionine-dependent methyltransferases superfamily protein, putative isoform 1 (1) | -                                                                                                                                                                                                                                                                                                                           | Lysine methyltransferase [IPR019410] (1); S-adenosyl-L-methionine-dependent methyltransferase [IPR020603] (1); FAM50 [IPR029426] (1)                                                                                                              | -                      | C_unihir_00244_mRNA_13.1 | -                        |
| GF0035944 | 0                   | 1                  | 0                     | Hypothetical protein (1)                                                                         | -                                                                                                                                                                                                                                                                                                                           | -                                                                                                                                                                                                                                                 | -                      | C_unihir_00244_mRNA_12.1 | -                        |
| GF0035943 | 0                   | 1                  | 0                     | Hypothetical protein (1)                                                                         | -                                                                                                                                                                                                                                                                                                                           | -                                                                                                                                                                                                                                                 | -                      | C_unihir_00244_mRNA_9.1  | -                        |
| GF0035942 | 0                   | 1                  | 0                     | Truncated RB (1)                                                                                 | ADP binding [GO:0043531 molecular_function] (1)                                                                                                                                                                                                                                                                             | P-loop containing nucleoside triphosphate hydrolase [IPR027417] (1); NB-ARC [IPR02182] (1)                                                                                                                                                        | -                      | C_unihir_00243_mRNA_8.1  | -                        |
| GF0035941 | 0                   | 1                  | 0                     | Hypothetical protein (1)                                                                         | -                                                                                                                                                                                                                                                                                                                           | -                                                                                                                                                                                                                                                 | -                      | C_unihir_00243_mRNA_40.1 | -                        |
| GF0035940 | 0                   | 1                  | 0                     | Hypothetical protein (1)                                                                         | -                                                                                                                                                                                                                                                                                                                           | -                                                                                                                                                                                                                                                 | -                      | C_unihir_00243_mRNA_39.1 | -                        |
| GF0035939 | 0                   | 1                  | 0                     | Hypothetical protein (1)                                                                         | -                                                                                                                                                                                                                                                                                                                           | -                                                                                                                                                                                                                                                 | -                      | C_unihir_00243_mRNA_37.1 | -                        |
| GF0035938 | 0                   | 1                  | 0                     | Hypothetical protein (1)                                                                         | -                                                                                                                                                                                                                                                                                                                           | -                                                                                                                                                                                                                                                 | -                      | C_unihir_00243_mRNA_36.1 | -                        |
| GF0035937 | 0                   | 1                  | 0                     | Hypothetical protein (1)                                                                         | -                                                                                                                                                                                                                                                                                                                           | -                                                                                                                                                                                                                                                 | -                      | C_unihir_00243_mRNA_32.1 | -                        |
| GF0035936 | 0                   | 1                  | 0                     | Putative disease resistance protein RG44 (1)                                                     | -                                                                                                                                                                                                                                                                                                                           | -                                                                                                                                                                                                                                                 | -                      | C_unihir_00243_mRNA_3.1  | -                        |
| GF0035935 | 0                   | 1                  | 0                     | Hypothetical protein (1)                                                                         | -                                                                                                                                                                                                                                                                                                                           | -                                                                                                                                                                                                                                                 | -                      | C_unihir_00243_mRNA_27.1 | -                        |
| GF0035934 | 0                   | 1                  | 0                     | Hypothetical protein (1)                                                                         | -                                                                                                                                                                                                                                                                                                                           | -                                                                                                                                                                                                                                                 | -                      | C_unihir_00243_mRNA_25.1 | -                        |
| GF0035933 | 0                   | 1                  | 0                     | Hypothetical protein (1)                                                                         | -                                                                                                                                                                                                                                                                                                                           | -                                                                                                                                                                                                                                                 | -                      | C_unihir_00243_mRNA_23.1 | -                        |
| GF0035932 | 0                   | 1                  | 0                     | Hypothetical protein (1)                                                                         | -                                                                                                                                                                                                                                                                                                                           | -                                                                                                                                                                                                                                                 | -                      | C_unihir_00243_mRNA_2.1  | -                        |
| GF0035931 | 0                   | 1                  | 0                     | Hypothetical protein (1)                                                                         | -                                                                                                                                                                                                                                                                                                                           | Leucine-rich repeat domain, L domain-like [IPR026275] (1)                                                                                                                                                                                         | -                      | C_unihir_00243_mRNA_19.1 | -                        |
| GF0035930 | 0                   | 1                  | 0                     | Hypothetical protein (1)                                                                         | -                                                                                                                                                                                                                                                                                                                           | -                                                                                                                                                                                                                                                 | -                      | C_unihir_00243_mRNA_16.1 | -                        |
| GF0035929 | 0                   | 1                  | 0                     | Hypothetical protein (1)                                                                         | ADP binding [GO:0043531 molecular_function] (1)                                                                                                                                                                                                                                                                             | P-loop containing nucleoside triphosphate hydrolase [IPR027417] (1); NB-ARC [IPR02182] (1)                                                                                                                                                        | -                      | C_unihir_00243_mRNA_15.1 | -                        |
| GF0035928 | 0                   | 1                  | 0                     | Anthocyanidin 3-O-glucosyltransferase (1)                                                        | transferase activity, transferring hexosyl groups [GO:0016758 molecular_function] (1); metabolic process [GO:0008182 biological_process] (1)                                                                                                                                                                                | UDP-glucosyltransferase [IPR002213] (1)                                                                                                                                                                                                           | -                      | C_unihir_00243_mRNA_14.1 | -                        |
| GF0035927 | 0                   | 1                  | 0                     | Hypothetical protein (1)                                                                         | ADP binding [GO:0043531 molecular_function] (1)                                                                                                                                                                                                                                                                             | P-loop containing nucleoside triphosphate hydrolase [IPR027417] (1); NB-ARC [IPR02182] (1)                                                                                                                                                        | -                      | C_unihir_00243_mRNA_12.1 | -                        |
| GF0035926 | 0                   | 1                  | 0                     | Hypothetical protein (1)                                                                         | -                                                                                                                                                                                                                                                                                                                           | -                                                                                                                                                                                                                                                 | -                      | C_unihir_00242_mRNA_9.1  | -                        |
| GF0035925 | 0                   | 1                  | 0                     | Hypothetical protein (1)                                                                         | -                                                                                                                                                                                                                                                                                                                           | Transposase, MuDR, plant [IPR004332] (1)                                                                                                                                                                                                          | -                      | C_unihir_00242_mRNA_5.1  | -                        |
| GF0035924 | 0                   | 1                  | 0                     | Hypothetical protein (1)                                                                         | zinc ion binding [GO:0008270 molecular_function] (1); nucleic acid binding [GO:0003676 molecular_function] (1)                                                                                                                                                                                                              | Zinc finger, CCHC-type [IPR01878] (1)                                                                                                                                                                                                             | -                      | C_unihir_00242_mRNA_30.1 | -                        |
| GF0035923 | 0                   | 1                  | 0                     | Cytosolic riboside 5'-monophosphate phosphoribosyltransferase (1)                                | -                                                                                                                                                                                                                                                                                                                           | LOG family [IPR011100] (1)                                                                                                                                                                                                                        | -                      | C_unihir_00242_mRNA_28.1 | -                        |



| ID       | Num. in <i>C. crotolariae</i> | Num. in <i>C. caudata</i> | Num. in <i>P. trifidata</i> | Note                                               | GO                                                                                                                                                                                                                                                                                                               | InterPro                                                                                                                                                                                                                                                                              | Members in <i>C. crotolariae</i> | Members in <i>C. caudata</i> | Members in <i>P. trifidata</i> |
|----------|-------------------------------|---------------------------|-----------------------------|----------------------------------------------------|------------------------------------------------------------------------------------------------------------------------------------------------------------------------------------------------------------------------------------------------------------------------------------------------------------------|---------------------------------------------------------------------------------------------------------------------------------------------------------------------------------------------------------------------------------------------------------------------------------------|----------------------------------|------------------------------|--------------------------------|
| GF003849 | 0                             | 1                         | 0                           | Hypothetical protein (1)                           | oxidation-reduction process [GO:005511] biological process (1); oxidoreductase activity [GO:001691] molecular_function (1)                                                                                                                                                                                       | Aldehyde oxidase/xanthine dehydrogenase, molybdopterin binding [IPRO06742] (1)                                                                                                                                                                                                        | -                                | C_unishii_00231_mRNA_35.1    | -                              |
| GF003848 | 0                             | 1                         | 0                           | Hypothetical protein (1)                           | oxidation-reduction process [GO:005511] biological process (1); oxidoreductase activity [GO:001691] molecular_function (1); electron carrier activity [GO:000955] molecular_function (1); iron-sulfur cluster binding [GO:0005156] molecular_function (1); metal ion binding [GO:0046872] molecular_function (1) | [2Fe-2S] binding [IPRO02888] (1); 2Fe-2S ferredoxin-type iron-sulfur binding domain [IPRO03611] (1); beta-group domain [IPRO12675] (1)                                                                                                                                                | -                                | C_unishii_00231_mRNA_34.1    | -                              |
| GF003847 | 0                             | 1                         | 0                           | Hypothetical protein (1)                           | -                                                                                                                                                                                                                                                                                                                | -                                                                                                                                                                                                                                                                                     | -                                | C_unishii_00231_mRNA_29.1    | -                              |
| GF003846 | 0                             | 1                         | 0                           | Hypothetical protein (1)                           | -                                                                                                                                                                                                                                                                                                                | -                                                                                                                                                                                                                                                                                     | -                                | C_unishii_00231_mRNA_28.1    | -                              |
| GF003845 | 0                             | 1                         | 0                           | Hypothetical protein (1)                           | -                                                                                                                                                                                                                                                                                                                | -                                                                                                                                                                                                                                                                                     | -                                | C_unishii_00231_mRNA_27.1    | -                              |
| GF003844 | 0                             | 1                         | 0                           | Hypothetical protein (1)                           | -                                                                                                                                                                                                                                                                                                                | -                                                                                                                                                                                                                                                                                     | -                                | C_unishii_00231_mRNA_26.1    | -                              |
| GF003843 | 0                             | 1                         | 0                           | Hypothetical protein (1)                           | -                                                                                                                                                                                                                                                                                                                | Leucine-rich repeat domain, I domain-like [IPRO22675] (1); Leucine-rich repeat 3 [IPRO11713] (1)                                                                                                                                                                                      | -                                | C_unishii_00231_mRNA_24.1    | -                              |
| GF003842 | 0                             | 1                         | 0                           | Hypothetical protein (1)                           | -                                                                                                                                                                                                                                                                                                                | -                                                                                                                                                                                                                                                                                     | -                                | C_unishii_00231_mRNA_23.1    | -                              |
| GF003841 | 0                             | 1                         | 0                           | Hypothetical protein (1)                           | -                                                                                                                                                                                                                                                                                                                | Leucine-rich repeat domain, I domain-like [IPRO22675] (1); Protein of unknown function DUF901 [IPRO10296] (1)                                                                                                                                                                         | -                                | C_unishii_00231_mRNA_22.1    | -                              |
| GF003840 | 0                             | 1                         | 0                           | Hypothetical protein (1)                           | -                                                                                                                                                                                                                                                                                                                | -                                                                                                                                                                                                                                                                                     | -                                | C_unishii_00231_mRNA_19.1    | -                              |
| GF003839 | 0                             | 1                         | 0                           | Hypothetical protein (1)                           | -                                                                                                                                                                                                                                                                                                                | -                                                                                                                                                                                                                                                                                     | -                                | C_unishii_00230_mRNA_7.1     | -                              |
| GF003838 | 0                             | 1                         | 0                           | 17.5 kDa class I heat shock protein (1)            | -                                                                                                                                                                                                                                                                                                                | Small heat shock protein HSP20 [IPRO1107] (1); HSP20-like chaperone [IPRO08978] (1); Alpha crystallin/Hsp20 domain [IPRO02668] (1)                                                                                                                                                    | -                                | C_unishii_00230_mRNA_62.1    | -                              |
| GF003837 | 0                             | 1                         | 0                           | Disease resistance protein (1)                     | ADP binding [GO:004531] molecular_function (1)                                                                                                                                                                                                                                                                   | NB-ARC [IPRO02182] (1); P-loop containing nucleoside triphosphate hydrolase [IPRO27417] (1); Leucine-rich repeat domain, I domain-like [IPRO22675] (1)                                                                                                                                | -                                | C_unishii_00230_mRNA_61.1    | -                              |
| GF003836 | 0                             | 1                         | 0                           | Disease resistance protein RPS2 (1)                | -                                                                                                                                                                                                                                                                                                                | -                                                                                                                                                                                                                                                                                     | -                                | C_unishii_00230_mRNA_60.1    | -                              |
| GF003835 | 0                             | 1                         | 0                           | Hypothetical protein (1)                           | -                                                                                                                                                                                                                                                                                                                | Leucine-rich repeat domain, I domain-like [IPRO22675] (1)                                                                                                                                                                                                                             | -                                | C_unishii_00230_mRNA_59.1    | -                              |
| GF003834 | 0                             | 1                         | 0                           | Hypothetical protein (1)                           | -                                                                                                                                                                                                                                                                                                                | -                                                                                                                                                                                                                                                                                     | -                                | C_unishii_00230_mRNA_44.1    | -                              |
| GF003833 | 0                             | 1                         | 0                           | Mutator-like transposase (1)                       | zinc ion binding [GO:0008270] molecular_function (1)                                                                                                                                                                                                                                                             | Zinc finger, SWIM-type [IPRO07527] (1); Transposase, MuIR, blunt [IPRO04312] (1); Zinc finger, PAM-type [IPRO06564] (1)                                                                                                                                                               | -                                | C_unishii_00230_mRNA_43.1    | -                              |
| GF003832 | 0                             | 1                         | 0                           | Hypothetical protein (1)                           | -                                                                                                                                                                                                                                                                                                                | -                                                                                                                                                                                                                                                                                     | -                                | C_unishii_00230_mRNA_4.1     | -                              |
| GF003831 | 0                             | 1                         | 0                           | Hypothetical protein (1)                           | -                                                                                                                                                                                                                                                                                                                | -                                                                                                                                                                                                                                                                                     | -                                | C_unishii_00230_mRNA_35.1    | -                              |
| GF003830 | 0                             | 1                         | 0                           | Hypothetical protein (1)                           | -                                                                                                                                                                                                                                                                                                                | -                                                                                                                                                                                                                                                                                     | -                                | C_unishii_00230_mRNA_26.1    | -                              |
| GF003829 | 0                             | 1                         | 0                           | Hypothetical protein (1)                           | -                                                                                                                                                                                                                                                                                                                | -                                                                                                                                                                                                                                                                                     | -                                | C_unishii_00230_mRNA_25.1    | -                              |
| GF003828 | 0                             | 1                         | 0                           | Hypothetical protein (1)                           | -                                                                                                                                                                                                                                                                                                                | Endonuclease/exonuclease/phosphatase [IPRO05155] (1)                                                                                                                                                                                                                                  | -                                | C_unishii_00230_mRNA_20.1    | -                              |
| GF003827 | 0                             | 1                         | 0                           | Hypothetical protein (1)                           | -                                                                                                                                                                                                                                                                                                                | -                                                                                                                                                                                                                                                                                     | -                                | C_unishii_00230_mRNA_2.1     | -                              |
| GF003826 | 0                             | 1                         | 0                           | Hypothetical protein (1)                           | -                                                                                                                                                                                                                                                                                                                | -                                                                                                                                                                                                                                                                                     | -                                | C_unishii_00230_mRNA_19.1    | -                              |
| GF003825 | 0                             | 1                         | 0                           | Maturase R (1)                                     | mRNA processing [GO:0006397] biological_process (1)                                                                                                                                                                                                                                                              | Domain X [IPRO24937] (1)                                                                                                                                                                                                                                                              | -                                | C_unishii_00230_mRNA_17.1    | -                              |
| GF003824 | 0                             | 1                         | 0                           | Hypothetical protein (1)                           | -                                                                                                                                                                                                                                                                                                                | -                                                                                                                                                                                                                                                                                     | -                                | C_unishii_00230_mRNA_14.1    | -                              |
| GF003823 | 0                             | 1                         | 0                           | Hypothetical protein (1)                           | -                                                                                                                                                                                                                                                                                                                | -                                                                                                                                                                                                                                                                                     | -                                | C_unishii_00230_mRNA_13.1    | -                              |
| GF003822 | 0                             | 1                         | 0                           | Hypothetical protein (1)                           | -                                                                                                                                                                                                                                                                                                                | -                                                                                                                                                                                                                                                                                     | -                                | C_unishii_00230_mRNA_12.1    | -                              |
| GF003821 | 0                             | 1                         | 0                           | Hypothetical protein (1)                           | -                                                                                                                                                                                                                                                                                                                | -                                                                                                                                                                                                                                                                                     | -                                | C_unishii_00230_mRNA_10.1    | -                              |
| GF003820 | 0                             | 1                         | 0                           | Hypothetical protein (1)                           | -                                                                                                                                                                                                                                                                                                                | -                                                                                                                                                                                                                                                                                     | -                                | C_unishii_00230_mRNA_1.1     | -                              |
| GF003819 | 0                             | 1                         | 0                           | Mitogen-activated protein kinase kinase (1)        | ATP binding [GO:0005524] molecular_function (1); protein kinase activity [GO:0004672] molecular_function (1); protein phosphorylation [GO:0006468] biological_process (1)                                                                                                                                        | Protein kinase domain [IPRO00719] (1); Protein kinase-like domain [IPRO11009] (1); Serine/threonine dual specificity protein kinase, catalytic domain [IPRO02290] (1); Serine/threonine-protein kinase, active site [IPRO05711] (1); Protein kinase, ATP binding site [IPRO17441] (1) | -                                | C_unishii_00229_mRNA_9.1     | -                              |
| GF003818 | 0                             | 1                         | 0                           | Hypothetical protein (1)                           | -                                                                                                                                                                                                                                                                                                                | -                                                                                                                                                                                                                                                                                     | -                                | C_unishii_00229_mRNA_42.1    | -                              |
| GF003817 | 0                             | 1                         | 0                           | Hypothetical protein (1)                           | ATP binding [GO:0005524] molecular_function (1); protein kinase activity [GO:0004672] molecular_function (1); protein phosphorylation [GO:0006468] biological_process (1)                                                                                                                                        | Protein kinase-like domain [IPRO11009] (1); Protein kinase domain [IPRO00719] (1)                                                                                                                                                                                                     | -                                | C_unishii_00229_mRNA_41.1    | -                              |
| GF003816 | 0                             | 1                         | 0                           | Hypothetical protein (1)                           | ATP binding [GO:0005524] molecular_function (1); protein phosphorylation [GO:0006468] biological_process (1); protein kinase activity [GO:0004672] molecular_function (1)                                                                                                                                        | Protein kinase domain [IPRO00719] (1); Protein kinase-like domain [IPRO11009] (1)                                                                                                                                                                                                     | -                                | C_unishii_00229_mRNA_40.1    | -                              |
| GF003815 | 0                             | 1                         | 0                           | Hypothetical protein (1)                           | ATP binding [GO:0005524] molecular_function (1); protein kinase activity [GO:0004672] molecular_function (1); ATP binding [GO:0005524] molecular_function (1)                                                                                                                                                    | Serine/threonine/tyrosine-protein kinase catalytic domain [IPRO01245] (1); Protein kinase domain [IPRO00719] (1); Protein kinase-like domain [IPRO11009] (1)                                                                                                                          | -                                | C_unishii_00229_mRNA_39.1    | -                              |
| GF003814 | 0                             | 1                         | 0                           | Kinase superfamily protein, putative isoform 2 (1) | ATP binding [GO:0005524] molecular_function (1); protein kinase activity [GO:0004672] molecular_function (1); protein phosphorylation [GO:0006468] biological_process (1)                                                                                                                                        | Protein kinase domain [IPRO00719] (1); Protein kinase-like domain [IPRO11009] (1)                                                                                                                                                                                                     | -                                | C_unishii_00229_mRNA_36.1    | -                              |
| GF003813 | 0                             | 1                         | 0                           | Hypothetical protein (1)                           | -                                                                                                                                                                                                                                                                                                                | Alpha/Beta hydrolase fold [IPRO29058] (1)                                                                                                                                                                                                                                             | -                                | C_unishii_00229_mRNA_22.1    | -                              |
| GF003812 | 0                             | 1                         | 0                           | Hypothetical protein (1)                           | microtubule binding [GO:0008017] molecular_function (1); microtubule-based movement [GO:0007018] biological_process (1); microtubule motor activity [GO:0003777] molecular_function (1); ATP binding [GO:0005524] molecular_function (1)                                                                         | P-loop containing nucleoside triphosphate hydrolase [IPRO27417] (1); Kinase-like protein [IPRO27400] (1); Kinase motor domain [IPRO01752] (1); Kinase motor domain, conserved site [IPRO19821] (1)                                                                                    | -                                | C_unishii_00229_mRNA_10.1    | -                              |
| GF003811 | 0                             | 1                         | 0                           | Hypothetical protein (1)                           | -                                                                                                                                                                                                                                                                                                                | -                                                                                                                                                                                                                                                                                     | -                                | C_unishii_00228_mRNA_38.1    | -                              |
| GF003810 | 0                             | 1                         | 0                           | Hypothetical protein (1)                           | -                                                                                                                                                                                                                                                                                                                | Zinc knuckle CXXC4HXGC [IPRO28360] (1)                                                                                                                                                                                                                                                | -                                | C_unishii_00228_mRNA_34.1    | -                              |
| GF003809 | 0                             | 1                         | 0                           | Hypothetical protein (1)                           | -                                                                                                                                                                                                                                                                                                                | Domain of unknown function DUF1985 [IPRO15410] (1)                                                                                                                                                                                                                                    | -                                | C_unishii_00228_mRNA_26.1    | -                              |
| GF003808 | 0                             | 1                         | 0                           | Hypothetical protein (1)                           | -                                                                                                                                                                                                                                                                                                                | -                                                                                                                                                                                                                                                                                     | -                                | C_unishii_00227_mRNA_9.1     | -                              |
| GF003807 | 0                             | 1                         | 0                           | Hypothetical protein (1)                           | -                                                                                                                                                                                                                                                                                                                | -                                                                                                                                                                                                                                                                                     | -                                | C_unishii_00227_mRNA_3.1     | -                              |
| GF003806 | 0                             | 1                         | 0                           | Hypothetical protein (1)                           | nucleic acid binding [GO:0003676] molecular_function (1)                                                                                                                                                                                                                                                         | Ribonuclease H-like domain [IPRO12337] (1)                                                                                                                                                                                                                                            | -                                | C_unishii_00227_mRNA_27.1    | -                              |
| GF003805 | 0                             | 1                         | 0                           | Hypothetical protein (1)                           | -                                                                                                                                                                                                                                                                                                                | -                                                                                                                                                                                                                                                                                     | -                                | C_unishii_00227_mRNA_24.1    | -                              |
| GF003804 | 0                             | 1                         | 0                           | Hypothetical protein (1)                           | -                                                                                                                                                                                                                                                                                                                | -                                                                                                                                                                                                                                                                                     | -                                | C_unishii_00227_mRNA_2.1     | -                              |
| GF003803 | 0                             | 1                         | 0                           | Hypothetical protein (1)                           | -                                                                                                                                                                                                                                                                                                                | -                                                                                                                                                                                                                                                                                     | -                                | C_unishii_00227_mRNA_18.1    | -                              |
| GF003802 | 0                             | 1                         | 0                           | Hypothetical protein (1)                           | -                                                                                                                                                                                                                                                                                                                | -                                                                                                                                                                                                                                                                                     | -                                | C_unishii_00227_mRNA_17.1    | -                              |
| GF003801 | 0                             | 1                         | 0                           | Hypothetical protein (1)                           | cysteine-type peptidase activity [GO:000824] molecular_function (1); proteolysis [GO:0006508] biological_process (1)                                                                                                                                                                                             | MpSANT-like domain [IPRO24752] (1); Ubl1 protease family, C-terminal catalytic domain [IPRO03653] (1); Domain of unknown function DUF1985 [IPRO15410] (1)                                                                                                                             | -                                | C_unishii_00227_mRNA_16.1    | -                              |
| GF003800 | 0                             | 1                         | 0                           | Hypothetical protein (1)                           | -                                                                                                                                                                                                                                                                                                                | -                                                                                                                                                                                                                                                                                     | -                                | C_unishii_00227_mRNA_12.1    | -                              |
| GF003799 | 0                             | 1                         | 0                           | Hypothetical protein (1)                           | -                                                                                                                                                                                                                                                                                                                | -                                                                                                                                                                                                                                                                                     | -                                | C_unishii_00227_mRNA_11.1    | -                              |
| GF003798 | 0                             | 1                         | 0                           | Hypothetical protein (1)                           | -                                                                                                                                                                                                                                                                                                                | -                                                                                                                                                                                                                                                                                     | -                                | C_unishii_00227_mRNA_10.1    | -                              |
| GF003797 | 0                             | 1                         | 0                           | Hypothetical protein (1)                           | -                                                                                                                                                                                                                                                                                                                | -                                                                                                                                                                                                                                                                                     | -                                | C_unishii_00227_mRNA_1.1     | -                              |
| GF003796 | 0                             | 1                         | 0                           | Hypothetical protein (1)                           | -                                                                                                                                                                                                                                                                                                                | -                                                                                                                                                                                                                                                                                     | -                                | C_unishii_00226_mRNA_9.1     | -                              |
| GF003795 | 0                             | 1                         | 0                           | Hypothetical protein (1)                           | -                                                                                                                                                                                                                                                                                                                | -                                                                                                                                                                                                                                                                                     | -                                | C_unishii_00226_mRNA_8.1     | -                              |
| GF003794 | 0                             | 1                         | 0                           | Hypothetical protein (1)                           | -                                                                                                                                                                                                                                                                                                                | -                                                                                                                                                                                                                                                                                     | -                                | C_unishii_00226_mRNA_7.1     | -                              |
| GF003793 | 0                             | 1                         | 0                           | Hypothetical protein (1)                           | -                                                                                                                                                                                                                                                                                                                | -                                                                                                                                                                                                                                                                                     | -                                | C_unishii_00226_mRNA_43.1    | -                              |
| GF003792 | 0                             | 1                         | 0                           | Hypothetical protein (1)                           | -                                                                                                                                                                                                                                                                                                                | -                                                                                                                                                                                                                                                                                     | -                                | C_unishii_00226_mRNA_42.1    | -                              |
| GF003791 | 0                             | 1                         | 0                           | Hypothetical protein (1)                           | -                                                                                                                                                                                                                                                                                                                | -                                                                                                                                                                                                                                                                                     | -                                | C_unishii_00226_mRNA_40.1    | -                              |
| GF003790 | 0                             | 1                         | 0                           | Hypothetical protein (1)                           | -                                                                                                                                                                                                                                                                                                                | -                                                                                                                                                                                                                                                                                     | -                                | C_unishii_00226_mRNA_34.1    | -                              |
| GF003789 | 0                             | 1                         | 0                           | Hypothetical protein (1)                           | -                                                                                                                                                                                                                                                                                                                | -                                                                                                                                                                                                                                                                                     | -                                | C_unishii_00226_mRNA_29.1    | -                              |
| GF003788 | 0                             | 1                         | 0                           | Hypothetical protein (1)                           | -                                                                                                                                                                                                                                                                                                                | -                                                                                                                                                                                                                                                                                     | -                                | C_unishii_00226_mRNA_27.1    | -                              |
| GF003787 | 0                             | 1                         | 0                           | Hypothetical protein (1)                           | -                                                                                                                                                                                                                                                                                                                | -                                                                                                                                                                                                                                                                                     | -                                | C_unishii_00226_mRNA_16.1    | -                              |
| GF003786 | 0                             | 1                         | 0                           | Hypothetical protein (1)                           | -                                                                                                                                                                                                                                                                                                                | -                                                                                                                                                                                                                                                                                     | -                                | C_unishii_00226_mRNA_14.1    | -                              |
| GF003785 | 0                             | 1                         | 0                           | Hypothetical protein (1)                           | -                                                                                                                                                                                                                                                                                                                | -                                                                                                                                                                                                                                                                                     | -                                | C_unishii_00226_mRNA_13.1    | -                              |
| GF003784 | 0                             | 1                         | 0                           | Hypothetical protein (1)                           | -                                                                                                                                                                                                                                                                                                                | -                                                                                                                                                                                                                                                                                     | -                                | C_unishii_00226_mRNA_12.1    | -                              |
| GF003783 | 0                             | 1                         | 0                           | No apical meristem family protein (1)              | DNA binding [GO:0003677] molecular_function (1); regulation of transcription, DNA-templated [GO:0006355] biological_process (1)                                                                                                                                                                                  | NAC domain [IPRO03441] (1)                                                                                                                                                                                                                                                            | -                                | C_unishii_00225_mRNA_6.1     | -                              |
| GF003782 | 0                             | 1                         | 0                           | Hypothetical protein (1)                           | -                                                                                                                                                                                                                                                                                                                | ELMO domain [IPRO06816] (1)                                                                                                                                                                                                                                                           | -                                | C_unishii_00225_mRNA_5.1     | -                              |
| GF003781 | 0                             | 1                         | 0                           | NAC transcription factor-like protein (1)          | regulation of transcription, DNA-templated [GO:0006355] biological_process (1); DNA binding [GO:0003677] molecular_function (1)                                                                                                                                                                                  | NAC domain [IPRO03441] (1)                                                                                                                                                                                                                                                            | -                                | C_unishii_00225_mRNA_4.1     | -                              |
| GF003780 | 0                             | 1                         | 0                           | Hypothetical protein (1)                           | -                                                                                                                                                                                                                                                                                                                | -                                                                                                                                                                                                                                                                                     | -                                | C_unishii_00225_mRNA_30.1    | -                              |
| GF003779 | 0                             | 1                         | 0                           | Hypothetical protein (1)                           | -                                                                                                                                                                                                                                                                                                                | -                                                                                                                                                                                                                                                                                     | -                                | C_unishii_00225_mRNA_3.1     | -                              |
| GF003778 | 0                             | 1                         | 0                           | Chlororespiratory reduction 42 (1)                 | -                                                                                                                                                                                                                                                                                                                | Protein of unknown function DUF3148 [IPRO21495] (1)                                                                                                                                                                                                                                   | -                                | C_unishii_00225_mRNA_28.1    | -                              |
| GF003777 | 0                             | 1                         | 0                           | Hypothetical protein (1)                           | -                                                                                                                                                                                                                                                                                                                | -                                                                                                                                                                                                                                                                                     | -                                | C_unishii_00225_mRNA_22.1    | -                              |
| GF003776 | 0                             | 1                         | 0                           | NAC protein 1 (1)                                  | DNA binding [GO:0003677] molecular_function (1); regulation of transcription, DNA-templated [GO:0006355] biological_process (1)                                                                                                                                                                                  | NAC domain [IPRO03441] (1)                                                                                                                                                                                                                                                            | -                                | C_unishii_00225_mRNA_2.1     | -                              |
| GF003775 | 0                             | 1                         | 0                           | Hypothetical protein (1)                           | -                                                                                                                                                                                                                                                                                                                | -                                                                                                                                                                                                                                                                                     | -                                | C_unishii_00225_mRNA_17.1    | -                              |
| GF003774 | 0                             | 1                         | 0                           | Hypothetical protein (1)                           | -                                                                                                                                                                                                                                                                                                                | -                                                                                                                                                                                                                                                                                     | -                                | C_unishii_00225_mRNA_16.1    | -                              |







| ID        | Num. in <i>C. crotolariae</i> | Num. in <i>C. canalis</i> | Num. in <i>P. trifidata</i> | Note                                                    | GO                                                                                                                                                                                                                                                                                                                                                                                                                                                                                                                                     | InterPro                                                                                                                                                                                                                                                                                                                                                                                                                                                                                                         | Members in <i>Crotolariae</i> | Members in <i>Canalis</i> | Members in <i>Trifidata</i> |
|-----------|-------------------------------|---------------------------|-----------------------------|---------------------------------------------------------|----------------------------------------------------------------------------------------------------------------------------------------------------------------------------------------------------------------------------------------------------------------------------------------------------------------------------------------------------------------------------------------------------------------------------------------------------------------------------------------------------------------------------------------|------------------------------------------------------------------------------------------------------------------------------------------------------------------------------------------------------------------------------------------------------------------------------------------------------------------------------------------------------------------------------------------------------------------------------------------------------------------------------------------------------------------|-------------------------------|---------------------------|-----------------------------|
| GF0035335 | 0                             | 1                         | 1                           | 0 Nodulin MN21/EaMA-like transporter family protein (1) | membrane [GO:0016020] cellular_component (1); transmembrane transporter activity [GO:0022857 molecular_function] (1); integral component of membrane [GO:0016021 cellular_component] (1)                                                                                                                                                                                                                                                                                                                                               | WAT1-related protein [IPR030184] (1); FaaA domain [IPR009020] (1)                                                                                                                                                                                                                                                                                                                                                                                                                                                | -                             | C_unihii_00189_mRNA_42.1  | -                           |
| GF0035334 | 0                             | 1                         | 1                           | 0 Hypothetical protein (1)                              | -                                                                                                                                                                                                                                                                                                                                                                                                                                                                                                                                      | -                                                                                                                                                                                                                                                                                                                                                                                                                                                                                                                | -                             | C_unihii_00189_mRNA_4.1   | -                           |
| GF0035333 | 0                             | 1                         | 1                           | 0 Hypothetical protein (1)                              | -                                                                                                                                                                                                                                                                                                                                                                                                                                                                                                                                      | -                                                                                                                                                                                                                                                                                                                                                                                                                                                                                                                | -                             | C_unihii_00189_mRNA_37.1  | -                           |
| GF0035332 | 0                             | 1                         | 1                           | 0 Hypothetical protein (1)                              | -                                                                                                                                                                                                                                                                                                                                                                                                                                                                                                                                      | -                                                                                                                                                                                                                                                                                                                                                                                                                                                                                                                | -                             | C_unihii_00189_mRNA_3.1   | -                           |
| GF0035331 | 0                             | 1                         | 1                           | 0 Tyrosine kinase family protein (1)                    | ATP binding [GO:0005524 molecular_function] (1); protein kinase activity [GO:0004672 molecular_function] (1); protein phosphorylation [GO:0006468 biological_process] (1)                                                                                                                                                                                                                                                                                                                                                              | Leucine-rich repeat domain, L domain-like [IPR023675] (1); Protein kinase-like domain [IPR011609] (1); Serine/threonine/dual specificity protein kinase, catalytic domain [IPR002290] (1); Leucine-rich repeat-containing N-terminal_plant-type [IPR013210] (1); Serine/threonine-tyrosine-protein kinase catalytic domain [IPR001245] (1)                                                                                                                                                                       | -                             | C_unihii_00189_mRNA_24.1  | -                           |
| GF0035330 | 0                             | 1                         | 1                           | 0 Hypothetical protein (1)                              | -                                                                                                                                                                                                                                                                                                                                                                                                                                                                                                                                      | -                                                                                                                                                                                                                                                                                                                                                                                                                                                                                                                | -                             | C_unihii_00189_mRNA_16.1  | -                           |
| GF0035329 | 0                             | 1                         | 1                           | 0 Hypothetical protein (1)                              | -                                                                                                                                                                                                                                                                                                                                                                                                                                                                                                                                      | -                                                                                                                                                                                                                                                                                                                                                                                                                                                                                                                | -                             | C_unihii_00189_mRNA_15.1  | -                           |
| GF0035328 | 0                             | 1                         | 1                           | 0 Hypothetical protein (1)                              | -                                                                                                                                                                                                                                                                                                                                                                                                                                                                                                                                      | -                                                                                                                                                                                                                                                                                                                                                                                                                                                                                                                | -                             | C_unihii_00189_mRNA_13.1  | -                           |
| GF0035327 | 0                             | 1                         | 1                           | 0 Hypothetical protein (1)                              | -                                                                                                                                                                                                                                                                                                                                                                                                                                                                                                                                      | -                                                                                                                                                                                                                                                                                                                                                                                                                                                                                                                | -                             | C_unihii_00189_mRNA_12.1  | -                           |
| GF0035326 | 0                             | 1                         | 1                           | 0 Hypothetical protein (1)                              | -                                                                                                                                                                                                                                                                                                                                                                                                                                                                                                                                      | -                                                                                                                                                                                                                                                                                                                                                                                                                                                                                                                | -                             | C_unihii_00189_mRNA_11.1  | -                           |
| GF0035325 | 0                             | 1                         | 1                           | 0 Hypothetical protein (1)                              | -                                                                                                                                                                                                                                                                                                                                                                                                                                                                                                                                      | -                                                                                                                                                                                                                                                                                                                                                                                                                                                                                                                | -                             | C_unihii_00188_mRNA_9.1   | -                           |
| GF0035324 | 0                             | 1                         | 1                           | 0 Hypothetical protein (1)                              | -                                                                                                                                                                                                                                                                                                                                                                                                                                                                                                                                      | -                                                                                                                                                                                                                                                                                                                                                                                                                                                                                                                | -                             | C_unihii_00188_mRNA_7.1   | -                           |
| GF0035323 | 0                             | 1                         | 1                           | 0 Vacuoloprocessing enzyme putative (1)                 | proteolysis [GO:0006508 biological_process] (1); lipase activity [GO:0008233 molecular_function] (1)                                                                                                                                                                                                                                                                                                                                                                                                                                   | Peptidase C13, legumin [IPR001096] (1)                                                                                                                                                                                                                                                                                                                                                                                                                                                                           | -                             | C_unihii_00188_mRNA_36.1  | -                           |
| GF0035322 | 0                             | 1                         | 1                           | 0 Legumin (1)                                           | proteolysis [GO:0006508 biological_process] (1); lipase activity [GO:0008233 molecular_function] (1)                                                                                                                                                                                                                                                                                                                                                                                                                                   | Peptidase C13, legumin [IPR001096] (1)                                                                                                                                                                                                                                                                                                                                                                                                                                                                           | -                             | C_unihii_00188_mRNA_34.1  | -                           |
| GF0035321 | 0                             | 1                         | 1                           | 0 LBR receptor like kinase family protein (1)           | protein kinase activity [GO:0004672 molecular_function] (1); protein phosphorylation [GO:0006468 biological_process] (1); ATP binding [GO:0005524 molecular_function] (1); protein binding [GO:0005515 molecular_function] (1)                                                                                                                                                                                                                                                                                                         | Concanavalin A-like lectin/ghamase domain [IPR013320] (1); Leucine-rich repeat, typical sub-type [IPR003591] (1); Protein kinase-like domain [IPR011009] (1); Leucine-rich repeat domain, L domain-like [IPR023675] (1); Protein kinase domain [IPR000719] (1); Leucine-rich repeat [IPR01611] (1); Serine/threonine/dual specificity protein kinase, catalytic domain [IPR002290] (1); Protein kinase, ATP binding site [IPR017441] (1); Serine/threonine-protein kinase, active site [IPR008271] (1)           | -                             | C_unihii_00188_mRNA_32.1  | -                           |
| GF0035320 | 0                             | 1                         | 1                           | 0 Hypothetical protein (1)                              | -                                                                                                                                                                                                                                                                                                                                                                                                                                                                                                                                      | -                                                                                                                                                                                                                                                                                                                                                                                                                                                                                                                | -                             | C_unihii_00188_mRNA_31.1  | -                           |
| GF0035319 | 0                             | 1                         | 1                           | 0 Hypothetical protein (1)                              | -                                                                                                                                                                                                                                                                                                                                                                                                                                                                                                                                      | -                                                                                                                                                                                                                                                                                                                                                                                                                                                                                                                | -                             | C_unihii_00188_mRNA_23.1  | -                           |
| GF0035318 | 0                             | 1                         | 1                           | 0 Potato DNA for copia-like transposable element (1)    | -                                                                                                                                                                                                                                                                                                                                                                                                                                                                                                                                      | Reverse transcriptase, RNA-dependent DNA polymerase [IPR013103] (1)                                                                                                                                                                                                                                                                                                                                                                                                                                              | -                             | C_unihii_00188_mRNA_16.1  | -                           |
| GF0035317 | 0                             | 1                         | 1                           | 0 Hypothetical protein (1)                              | protein binding [GO:0005515 molecular_function] (1)                                                                                                                                                                                                                                                                                                                                                                                                                                                                                    | Leucine-rich repeat domain, L domain-like [IPR023675] (1); Leucine-rich repeat [IPR01611] (1)                                                                                                                                                                                                                                                                                                                                                                                                                    | -                             | C_unihii_00188_mRNA_15.1  | -                           |
| GF0035316 | 0                             | 1                         | 1                           | 0 Hypothetical protein (1)                              | -                                                                                                                                                                                                                                                                                                                                                                                                                                                                                                                                      | -                                                                                                                                                                                                                                                                                                                                                                                                                                                                                                                | -                             | C_unihii_00188_mRNA_14.1  | -                           |
| GF0035315 | 0                             | 1                         | 1                           | 0 Hypothetical protein (1)                              | zinc ion binding [GO:0008270 molecular_function] (1); nucleic acid binding [GO:0003676 molecular_function] (1)                                                                                                                                                                                                                                                                                                                                                                                                                         | Zinc finger, CCHC-type [IPR001878] (1)                                                                                                                                                                                                                                                                                                                                                                                                                                                                           | -                             | C_unihii_00188_mRNA_13.1  | -                           |
| GF0035314 | 0                             | 1                         | 1                           | 0 Hypothetical protein (1)                              | -                                                                                                                                                                                                                                                                                                                                                                                                                                                                                                                                      | -                                                                                                                                                                                                                                                                                                                                                                                                                                                                                                                | -                             | C_unihii_00188_mRNA_10.1  | -                           |
| GF0035313 | 0                             | 1                         | 1                           | 0 Hypothetical protein (1)                              | -                                                                                                                                                                                                                                                                                                                                                                                                                                                                                                                                      | -                                                                                                                                                                                                                                                                                                                                                                                                                                                                                                                | -                             | C_unihii_00187_mRNA_40.1  | -                           |
| GF0035312 | 0                             | 1                         | 1                           | 0 Hypothetical protein (1)                              | -                                                                                                                                                                                                                                                                                                                                                                                                                                                                                                                                      | -                                                                                                                                                                                                                                                                                                                                                                                                                                                                                                                | -                             | C_unihii_00187_mRNA_3.1   | -                           |
| GF0035311 | 0                             | 1                         | 1                           | 0 Hypothetical protein (1)                              | -                                                                                                                                                                                                                                                                                                                                                                                                                                                                                                                                      | -                                                                                                                                                                                                                                                                                                                                                                                                                                                                                                                | -                             | C_unihii_00187_mRNA_19.1  | -                           |
| GF0035310 | 0                             | 1                         | 1                           | 0 Hypothetical protein (1)                              | -                                                                                                                                                                                                                                                                                                                                                                                                                                                                                                                                      | -                                                                                                                                                                                                                                                                                                                                                                                                                                                                                                                | -                             | C_unihii_00186_mRNA_31.1  | -                           |
| GF0035309 | 0                             | 1                         | 1                           | 0 Hypothetical protein (1)                              | ATP binding [GO:0005524 molecular_function] (1); nucleoside-containing compound metabolic process [GO:0006139 biological_process] (1); nucleoside-containing compound kinase activity [GO:0019205 molecular_function] (1)                                                                                                                                                                                                                                                                                                              | Adenylate kinase UMP-CMP kinase [IPR000850] (1)                                                                                                                                                                                                                                                                                                                                                                                                                                                                  | -                             | C_unihii_00186_mRNA_29.1  | -                           |
| GF0035308 | 0                             | 1                         | 1                           | 0 Hypothetical protein (1)                              | -                                                                                                                                                                                                                                                                                                                                                                                                                                                                                                                                      | -                                                                                                                                                                                                                                                                                                                                                                                                                                                                                                                | -                             | C_unihii_00186_mRNA_25.1  | -                           |
| GF0035307 | 0                             | 1                         | 1                           | 0 F-box/Rbx1-like superfamily protein isoform 1 (1)     | protein binding [GO:0005515 molecular_function] (1)                                                                                                                                                                                                                                                                                                                                                                                                                                                                                    | F-box domain [IPR001810] (1); Leucine-rich repeat domain, L domain-like [IPR023675] (1)                                                                                                                                                                                                                                                                                                                                                                                                                          | -                             | C_unihii_00186_mRNA_2.1   | -                           |
| GF0035306 | 0                             | 1                         | 1                           | 0 Ribonucleoside-diphosphate reductase subunit beta (1) | protein serine/threonine kinase activity [GO:0004674 molecular_function] (1); protein binding [GO:0005515 molecular_function] (1)                                                                                                                                                                                                                                                                                                                                                                                                      | Serine/threonine-protein kinase Ras1 [IPR017407] (1)                                                                                                                                                                                                                                                                                                                                                                                                                                                             | -                             | C_unihii_00186_mRNA_12.1  | -                           |
| GF0035305 | 0                             | 1                         | 1                           | 0 Hypothetical protein (1)                              | -                                                                                                                                                                                                                                                                                                                                                                                                                                                                                                                                      | Proteinase component (PC1) domain [IPR000717] (1)                                                                                                                                                                                                                                                                                                                                                                                                                                                                | -                             | C_unihii_00186_mRNA_1.1   | -                           |
| GF0035304 | 0                             | 1                         | 1                           | 0 Hypothetical protein (1)                              | -                                                                                                                                                                                                                                                                                                                                                                                                                                                                                                                                      | -                                                                                                                                                                                                                                                                                                                                                                                                                                                                                                                | -                             | C_unihii_00185_mRNA_7.1   | -                           |
| GF0035303 | 0                             | 1                         | 1                           | 0 Hypothetical protein (1)                              | -                                                                                                                                                                                                                                                                                                                                                                                                                                                                                                                                      | -                                                                                                                                                                                                                                                                                                                                                                                                                                                                                                                | -                             | C_unihii_00185_mRNA_6.1   | -                           |
| GF0035302 | 0                             | 1                         | 1                           | 0 Hypothetical protein (1)                              | -                                                                                                                                                                                                                                                                                                                                                                                                                                                                                                                                      | -                                                                                                                                                                                                                                                                                                                                                                                                                                                                                                                | -                             | C_unihii_00185_mRNA_5.1   | -                           |
| GF0035301 | 0                             | 1                         | 1                           | 0 Receptor like protein 27 (1)                          | protein binding [GO:0005515 molecular_function] (1)                                                                                                                                                                                                                                                                                                                                                                                                                                                                                    | Euxostoin-like [IPR004263] (1); Leucine-rich repeat domain, L domain-like [IPR023675] (1); Leucine-rich repeat, typical sub-type [IPR003591] (1); Leucine-rich repeat-containing N-terminal_plant-type [IPR013210] (1); Leucine-rich repeat [IPR01611] (1)                                                                                                                                                                                                                                                       | -                             | C_unihii_00185_mRNA_41.1  | -                           |
| GF0035300 | 0                             | 1                         | 1                           | 0 Hypothetical protein (1)                              | -                                                                                                                                                                                                                                                                                                                                                                                                                                                                                                                                      | -                                                                                                                                                                                                                                                                                                                                                                                                                                                                                                                | -                             | C_unihii_00185_mRNA_40.1  | -                           |
| GF0034999 | 0                             | 1                         | 1                           | 0 Hypothetical protein (1)                              | -                                                                                                                                                                                                                                                                                                                                                                                                                                                                                                                                      | -                                                                                                                                                                                                                                                                                                                                                                                                                                                                                                                | -                             | C_unihii_00185_mRNA_37.1  | -                           |
| GF0034998 | 0                             | 1                         | 1                           | 0 Receptor like protein 33 (1)                          | protein binding [GO:0005515 molecular_function] (1)                                                                                                                                                                                                                                                                                                                                                                                                                                                                                    | Leucine-rich repeat [IPR01611] (1); Leucine-rich repeat domain, L domain-like [IPR023675] (1)                                                                                                                                                                                                                                                                                                                                                                                                                    | -                             | C_unihii_00185_mRNA_33.1  | -                           |
| GF0034997 | 0                             | 1                         | 1                           | 0 Hypothetical protein (1)                              | -                                                                                                                                                                                                                                                                                                                                                                                                                                                                                                                                      | -                                                                                                                                                                                                                                                                                                                                                                                                                                                                                                                | -                             | C_unihii_00185_mRNA_11.1  | -                           |
| GF0034996 | 0                             | 1                         | 1                           | 0 Hypothetical protein (1)                              | -                                                                                                                                                                                                                                                                                                                                                                                                                                                                                                                                      | -                                                                                                                                                                                                                                                                                                                                                                                                                                                                                                                | -                             | C_unihii_00185_mRNA_10.1  | -                           |
| GF0034995 | 0                             | 1                         | 1                           | 0 Ras-related protein RARA1f (1)                        | protein transport [GO:0015031 biological_process] (1); GTPase activity [GO:0003024 molecular_function] (1); intracellular protein transport [GO:0006886 biological_process] (1); GTP binding [GO:0005525 molecular_function] (1); intracellular signal transduction [GO:0007165 biological_process] (1); membrane [GO:0016020 cellular_component] (1); nucleocytoplasmic transport [GO:0009913 biological_process] (1); small GTPase mediated signal transduction [GO:0007264 biological_process] (1)                                  | Small GTPase superfamily, Rho type [IPR003578] (1); Small GTP-binding protein domain [IPR002525] (1); P-loop containing nucleoside triphosphate hydrolyase [IPR027473] (1); Small GTPase superfamily [IPR001806] (1); Ras GTPase [IPR002041] (1); Small GTPase superfamily, Rab type [IPR005797] (1); Small GTPase superfamily, Ras type [IPR020849] (1)                                                                                                                                                         | -                             | C_unihii_00184_mRNA_6.1   | -                           |
| GF0034994 | 0                             | 1                         | 1                           | 0 Hypothetical protein (1)                              | nucleic acid binding [GO:0003676 molecular_function] (1); zinc ion binding [GO:0008270 molecular_function] (1)                                                                                                                                                                                                                                                                                                                                                                                                                         | Bull-type lectin domain [IPR001480] (1)                                                                                                                                                                                                                                                                                                                                                                                                                                                                          | -                             | C_unihii_00184_mRNA_5.1   | -                           |
| GF0034993 | 0                             | 1                         | 1                           | 0 Zinc knuckle family protein (1)                       | nucleic acid binding [GO:0003676 molecular_function] (1); zinc ion binding [GO:0008270 molecular_function] (1)                                                                                                                                                                                                                                                                                                                                                                                                                         | Zinc finger, CCHC-type [IPR001878] (1)                                                                                                                                                                                                                                                                                                                                                                                                                                                                           | -                             | C_unihii_00184_mRNA_40.1  | -                           |
| GF0034992 | 0                             | 1                         | 1                           | 0 Hypothetical protein (1)                              | -                                                                                                                                                                                                                                                                                                                                                                                                                                                                                                                                      | -                                                                                                                                                                                                                                                                                                                                                                                                                                                                                                                | -                             | C_unihii_00184_mRNA_28.1  | -                           |
| GF0034991 | 0                             | 1                         | 1                           | 0 Hypothetical protein (1)                              | -                                                                                                                                                                                                                                                                                                                                                                                                                                                                                                                                      | -                                                                                                                                                                                                                                                                                                                                                                                                                                                                                                                | -                             | C_unihii_00184_mRNA_24.1  | -                           |
| GF0034990 | 0                             | 1                         | 1                           | 0 Hypothetical protein (1)                              | -                                                                                                                                                                                                                                                                                                                                                                                                                                                                                                                                      | Pentapeptide repeat [IPR002885] (1)                                                                                                                                                                                                                                                                                                                                                                                                                                                                              | -                             | C_unihii_00184_mRNA_2.1   | -                           |
| GF0034889 | 0                             | 1                         | 1                           | 0 Glyoxen synthase kinase-3 MAK-3 family protein (1)    | ATP binding [GO:0005524 molecular_function] (1); oxidation-reduction process [GO:0055114 biological_process] (1); protein kinase activity [GO:0004672 molecular_function] (1); peroxidase activity [GO:0004601 molecular_function] (1); protein phosphorylation [GO:0006468 biological_process] (1); heme binding [GO:0020317 molecular_function] (1); response to oxidative stress [GO:0006979 biological_process] (1)                                                                                                                | Haem peroxidase, plant/fungal/bacterial [IPR020161] (1); Serine/threonine/dual specificity protein kinase, catalytic domain [IPR002290] (1); Serine/threonine-protein kinase, active site [IPR008271] (1); Protein kinase, ATP binding site [IPR017441] (1); Peroxidase, active site [IPR019796] (1); Plant peroxidase [IPR009023] (1); Peroxidases heme-binding ligand site [IPR019793] (1); Protein kinase domain [IPR000719] (1); Protein kinase-like domain [IPR011009] (1); Haem peroxidase [IPR001255] (1) | -                             | C_unihii_00184_mRNA_13.1  | -                           |
| GF0034888 | 0                             | 1                         | 1                           | 0 Hypothetical protein (1)                              | -                                                                                                                                                                                                                                                                                                                                                                                                                                                                                                                                      | Ribosomal protein L5 domain [IPR022053] (1); Ribosomal protein L5, N-terminal [IPR031310] (1)                                                                                                                                                                                                                                                                                                                                                                                                                    | -                             | C_unihii_00184_mRNA_10.1  | -                           |
| GF0034887 | 0                             | 1                         | 1                           | 0 Hypothetical protein (1)                              | -                                                                                                                                                                                                                                                                                                                                                                                                                                                                                                                                      | Bull-type lectin domain [IPR001480] (1)                                                                                                                                                                                                                                                                                                                                                                                                                                                                          | -                             | C_unihii_00184_mRNA_1.1   | -                           |
| GF0034886 | 0                             | 1                         | 1                           | 0 Alcohol dehydrogenase 1 (1)                           | oxidoreductase activity [GO:0016491 molecular_function] (1); oxidation-reduction process [GO:0055114 biological_process] (1); zinc ion binding [GO:0008270 molecular_function] (1)                                                                                                                                                                                                                                                                                                                                                     | NAD(P)-binding domain [IPR016040] (1); Alcohol dehydrogenase, C-terminal [IPR01111] (1); Alcohol dehydrogenase, N-terminal [IPR013154] (1); Alcohol dehydrogenase zinc-type, conserved site [IPR002328] (1); Alcohol dehydrogenase superfamily, zinc-type [IPR002085] (1); GroES-like [IPR011052] (1)                                                                                                                                                                                                            | -                             | C_unihii_00183_mRNA_37.1  | -                           |
| GF0034885 | 0                             | 1                         | 1                           | 0 Alcohol dehydrogenase 1 (1)                           | zinc ion binding [GO:0008270 molecular_function] (1); oxidoreductase activity [GO:0016491 molecular_function] (1); oxidation-reduction process [GO:0055114 biological_process] (1)                                                                                                                                                                                                                                                                                                                                                     | Alcohol dehydrogenase superfamily, zinc-type [IPR002085] (1); GroES-like [IPR011052] (1)                                                                                                                                                                                                                                                                                                                                                                                                                         | -                             | C_unihii_00183_mRNA_35.1  | -                           |
| GF0034884 | 0                             | 1                         | 1                           | 0 Hypothetical protein (1)                              | zinc ion binding [GO:0005596 molecular_function] (1); fatty acid metabolic process [GO:0006631 biological_process] (1); heme binding [GO:0020317 molecular_function] (1); acyl-[acyl-carrier-protein] desaturase activity [GO:0045200 molecular_function] (1); oxidoreductase activity, acting on paired donors, with incorporation or reduction of molecular oxygen [GO:0016705 molecular_function] (1); oxidoreductase activity [GO:0016491 molecular_function] (1); oxidation-reduction process [GO:0055114 biological_process] (1) | Fatty acid desaturase, type 2 [IPR005067] (1); Ferritin-like superfamily [IPR000978] (1); Ribonucleotide reductase-related [IPR012484] (1); Cytoschrome P450 [IPR011128] (1)                                                                                                                                                                                                                                                                                                                                     | -                             | C_unihii_00183_mRNA_32.1  | -                           |



| ID        | Num. in C. crottenstei | Num. in C. canalis | Num. in P. trifidatus | Term                                                              | GO                                                                                                                                                                                                                                         | InterPro                                                                                                                                                                                                                                                                                                                                                | Members in C. crottenstei | Members in C. canalis   | Members in P. trifidatus |
|-----------|------------------------|--------------------|-----------------------|-------------------------------------------------------------------|--------------------------------------------------------------------------------------------------------------------------------------------------------------------------------------------------------------------------------------------|---------------------------------------------------------------------------------------------------------------------------------------------------------------------------------------------------------------------------------------------------------------------------------------------------------------------------------------------------------|---------------------------|-------------------------|--------------------------|
| GF0035483 | 0                      | 1                  | 0                     | Hypothetical protein (1)                                          |                                                                                                                                                                                                                                            |                                                                                                                                                                                                                                                                                                                                                         |                           | C_unihh_00183_mRNA_16.1 | -                        |
| GF0035482 | 0                      | 1                  | 0                     | Envelope glycoprotein (1)                                         | protein binding [GO:0005515 molecular_function] (1)                                                                                                                                                                                        | PLA2LH2 domain [IPRO01024] (1); Embryo-specific 3 [IPRO10417] (1)                                                                                                                                                                                                                                                                                       | -                         | C_unihh_00182_mRNA_41.1 | -                        |
| GF0035481 | 0                      | 1                  | 0                     | Hypothetical protein (1)                                          |                                                                                                                                                                                                                                            |                                                                                                                                                                                                                                                                                                                                                         |                           | C_unihh_00182_mRNA_4.1  | -                        |
| GF0035480 | 0                      | 1                  | 0                     | Cysteine and histidine-rich domain-containing protein (1)         |                                                                                                                                                                                                                                            | CHORD domain [IPRO07051] (1)                                                                                                                                                                                                                                                                                                                            | -                         | C_unihh_00182_mRNA_36.1 | -                        |
| GF0035479 | 0                      | 1                  | 0                     | Putative rRNA-processing protein EBP2 (1)                         |                                                                                                                                                                                                                                            | Eukaryotic rRNA processing [IPRO08610] (1)                                                                                                                                                                                                                                                                                                              | -                         | C_unihh_00182_mRNA_30.1 | -                        |
| GF0035478 | 0                      | 1                  | 0                     | Hypothetical protein (1)                                          |                                                                                                                                                                                                                                            |                                                                                                                                                                                                                                                                                                                                                         |                           | C_unihh_00182_mRNA_18.1 | -                        |
| GF0035477 | 0                      | 1                  | 0                     | Hypothetical protein (1)                                          |                                                                                                                                                                                                                                            |                                                                                                                                                                                                                                                                                                                                                         |                           | C_unihh_00182_mRNA_12.1 | -                        |
| GF0035476 | 0                      | 1                  | 0                     | Hypothetical protein (1)                                          |                                                                                                                                                                                                                                            |                                                                                                                                                                                                                                                                                                                                                         |                           | C_unihh_00181_mRNA_32.1 | -                        |
| GF0035475 | 0                      | 1                  | 0                     | Hexosyltransferase (1)                                            | transferase activity, transferring glycosyl groups [GO:0016757 molecular_function] (1); polyketononase 4-alpha-galacturonosyltransferase activity [GO:0047262 molecular_function] (1)                                                      | Nucleotide-diphospho-sugar transferases [IPRO29044] (4); Plant galactononotransferase GAUT [IPRO29993] (1); Glycosyl transferase, family 4 [IPRO02495] (1)                                                                                                                                                                                              | -                         | C_unihh_00181_mRNA_25.1 | -                        |
| GF0035474 | 0                      | 1                  | 0                     | LRR receptor-like kinase (1)                                      | protein binding [GO:0005515 molecular_function] (1)                                                                                                                                                                                        | Leucine-rich repeat, typical subtype [IPRO03911] (1); Leucine-rich repeat domain, I domain-like [IPRO32675] (1); Leucine-rich repeat [IPRO01611] (1)                                                                                                                                                                                                    | -                         | C_unihh_00181_mRNA_15.1 | -                        |
| GF0035473 | 0                      | 1                  | 0                     | Hypothetical protein (1)                                          |                                                                                                                                                                                                                                            |                                                                                                                                                                                                                                                                                                                                                         |                           | C_unihh_00181_mRNA_14.1 | -                        |
| GF0035472 | 0                      | 1                  | 0                     | Hypothetical protein (1)                                          |                                                                                                                                                                                                                                            |                                                                                                                                                                                                                                                                                                                                                         |                           | C_unihh_00180_mRNA_7.1  | -                        |
| GF0035471 | 0                      | 1                  | 0                     | Hypothetical protein (1)                                          |                                                                                                                                                                                                                                            |                                                                                                                                                                                                                                                                                                                                                         |                           | C_unihh_00180_mRNA_4.1  | -                        |
| GF0035470 | 0                      | 1                  | 0                     | Hypothetical protein (1)                                          |                                                                                                                                                                                                                                            |                                                                                                                                                                                                                                                                                                                                                         |                           | C_unihh_00180_mRNA_34.1 | -                        |
| GF0035469 | 0                      | 1                  | 0                     | Putative calcium-transporting ATPase 13, plasma membrane-type (1) | metal ion binding [GO:0046872 molecular_function] (1); integral component of membrane [GO:0016021 cellular_component] (1); nucleotide binding [GO:0000166 molecular_function] (1)                                                          | P-type ATPase, A domain [IPRO02250] (1); HAD-like domain [IPRO23214] (1); Cation-transporting P-type ATPase, N-terminal [IPRO01041] (1); P-type ATPase [IPRO01757] (1); P-type ATPase, cytoplasmic domain N [IPRO23299] (1); P-type ATPase, phosphotransferase [IPRO18303] (1)                                                                          | -                         | C_unihh_00180_mRNA_32.1 | -                        |
| GF0035468 | 0                      | 1                  | 0                     | Hypothetical protein (1)                                          |                                                                                                                                                                                                                                            |                                                                                                                                                                                                                                                                                                                                                         |                           | C_unihh_00180_mRNA_23.1 | -                        |
| GF0035467 | 0                      | 1                  | 0                     | Hypothetical protein (1)                                          |                                                                                                                                                                                                                                            |                                                                                                                                                                                                                                                                                                                                                         |                           | C_unihh_00180_mRNA_17.1 | -                        |
| GF0035466 | 0                      | 1                  | 0                     | Hypothetical protein (1)                                          |                                                                                                                                                                                                                                            | Domain of unknown function DUF4283 [IPRO25588] (1)                                                                                                                                                                                                                                                                                                      | -                         | C_unihh_00180_mRNA_12.1 | -                        |
| GF0035465 | 0                      | 1                  | 0                     | Phage resistance protein RPS2, putative (1)                       |                                                                                                                                                                                                                                            |                                                                                                                                                                                                                                                                                                                                                         |                           | C_unihh_00180_mRNA_11.1 | -                        |
| GF0035464 | 0                      | 1                  | 0                     | Hypothetical protein (1)                                          |                                                                                                                                                                                                                                            |                                                                                                                                                                                                                                                                                                                                                         |                           | C_unihh_00180_mRNA_1.1  | -                        |
| GF0035463 | 0                      | 1                  | 0                     | Polyketoside transferase, Ribonuclease H sub (1)                  | nucleic acid binding [GO:0003676 molecular_function] (1)                                                                                                                                                                                   | Ribonuclease H-like domain [IPRO12337] (1)                                                                                                                                                                                                                                                                                                              | -                         | C_unihh_00179_mRNA_27.1 | -                        |
| GF0035462 | 0                      | 1                  | 0                     | Hypothetical protein (1)                                          |                                                                                                                                                                                                                                            |                                                                                                                                                                                                                                                                                                                                                         |                           | C_unihh_00179_mRNA_26.1 | -                        |
| GF0035461 | 0                      | 1                  | 0                     | Protein arginine-N-methyltransferase 7 (1)                        | protein methylation [GO:0006479 biological_process] (1); methyltransferase activity [GO:0008168 molecular_function] (1)                                                                                                                    | DnaJ-like protein C11, C-terminal [IPRO25480] (1); Protein arginine-N-methyltransferase [IPRO25799] (1); S-adenosyl-L-methionine-dependent methyltransferase [IPRO29063] (1); Heat shock protein 70kD, C-terminal domain [IPRO29048] (1); Heat shock protein 70 family [IPRO13326] (1); Heat shock protein 70kD, peptide-binding domain [IPRO29047] (1) | -                         | C_unihh_00179_mRNA_11.1 | -                        |
| GF0035460 | 0                      | 1                  | 0                     | Hypothetical protein (1)                                          |                                                                                                                                                                                                                                            |                                                                                                                                                                                                                                                                                                                                                         |                           | C_unihh_00179_mRNA_1.1  | -                        |
| GF0035459 | 0                      | 1                  | 0                     | Hypothetical protein (1)                                          | membrane [GO:0016020 cellular_component] (1); transport [GO:0006810 biological_process] (1); transporter activity [GO:0005215 molecular_function] (1)                                                                                      | Major facilitator superfamily domain [IPRO08461] (1); Proton-dependent oligopeptide transporter family [IPRO01019] (1)                                                                                                                                                                                                                                  | -                         | C_unihh_00178_mRNA_7.1  | -                        |
| GF0035458 | 0                      | 1                  | 0                     | Hypothetical protein (1)                                          |                                                                                                                                                                                                                                            |                                                                                                                                                                                                                                                                                                                                                         |                           | C_unihh_00178_mRNA_34.1 | -                        |
| GF0035457 | 0                      | 1                  | 0                     | Hypothetical protein (1)                                          |                                                                                                                                                                                                                                            |                                                                                                                                                                                                                                                                                                                                                         |                           | C_unihh_00178_mRNA_31.1 | -                        |
| GF0035456 | 0                      | 1                  | 0                     | Hypothetical protein (1)                                          | GTP binding [GO:0005525 molecular_function] (1); microtubule [GO:000574 cellular_component] (1); structural constituent of cytoskeleton [GO:0005200 molecular_function] (1); microtubule-based process [GO:0007017 biological_process] (1) | Reverse transcriptase zinc-binding domain [IPRO26960] (1); Tubulin/FtsZ, C-terminal [IPRO08280] (1); Tubulin [IPRO02113] (1); Tubulin/FtsZ, 2-layer sandwich domain [IPRO18316] (1); Tubulin, C-terminal [IPRO23123] (1); Alpha tubulin [IPRO2452] (1)                                                                                                  | -                         | C_unihh_00178_mRNA_30.1 | -                        |
| GF0035455 | 0                      | 1                  | 0                     | Hypothetical protein (1)                                          |                                                                                                                                                                                                                                            |                                                                                                                                                                                                                                                                                                                                                         |                           | C_unihh_00178_mRNA_23.1 | -                        |
| GF0035454 | 0                      | 1                  | 0                     | Hypothetical protein (1)                                          |                                                                                                                                                                                                                                            |                                                                                                                                                                                                                                                                                                                                                         |                           | C_unihh_00178_mRNA_22.1 | -                        |
| GF0035453 | 0                      | 1                  | 0                     | Transposable element Ac (1)                                       | DNA binding [GO:0003777 molecular_function] (1); protein dimerization activity [GO:0046983 molecular_function] (1); nucleic acid binding [GO:0003676 molecular_function] (1)                                                               | HAT, C-terminal dimerization domain [IPRO08960] (1); Zinc finger, BED-type [IPRO06160] (1); Ribonuclease H-like domain [IPRO12337] (1)                                                                                                                                                                                                                  | -                         | C_unihh_00178_mRNA_16.1 | -                        |
| GF0035452 | 0                      | 1                  | 0                     | Hypothetical protein (1)                                          |                                                                                                                                                                                                                                            |                                                                                                                                                                                                                                                                                                                                                         |                           | C_unihh_00178_mRNA_1.1  | -                        |
| GF0035451 | 0                      | 1                  | 0                     | Hypothetical protein (1)                                          |                                                                                                                                                                                                                                            |                                                                                                                                                                                                                                                                                                                                                         |                           | C_unihh_00177_mRNA_9.1  | -                        |
| GF0035450 | 0                      | 1                  | 0                     | Hypothetical protein (1)                                          |                                                                                                                                                                                                                                            |                                                                                                                                                                                                                                                                                                                                                         |                           | C_unihh_00177_mRNA_8.1  | -                        |
| GF0035449 | 0                      | 1                  | 0                     | Hypothetical protein (1)                                          |                                                                                                                                                                                                                                            |                                                                                                                                                                                                                                                                                                                                                         |                           | C_unihh_00177_mRNA_32.1 | -                        |
| GF0035448 | 0                      | 1                  | 0                     | Hypothetical protein (1)                                          |                                                                                                                                                                                                                                            |                                                                                                                                                                                                                                                                                                                                                         |                           | C_unihh_00177_mRNA_31.1 | -                        |
| GF0035447 | 0                      | 1                  | 0                     | Hypothetical protein (1)                                          | regulation of transcription, DNA-templated [GO:0006355 biological_process] (1); zinc ion binding [GO:000870 molecular_function] (1)                                                                                                        | FAR1 DNA binding domain [IPRO04330] (1); FHY3/FAR1 family [IPRO31052] (1); Zinc finger, SWIM-type [IPRO01527] (1); Zinc finger, PML-type [IPRO06654] (1)                                                                                                                                                                                                | -                         | C_unihh_00177_mRNA_30.1 | -                        |
| GF0035446 | 0                      | 1                  | 0                     | Hypothetical protein (1)                                          | proteolysis [GO:0006508 biological_process] (1); cysteine-type peptidase activity [GO:0008234 molecular_function] (1)                                                                                                                      | Sec3 domain [IPRO04179] (1); DnaJ domain [IPRO01023] (1); Ulp1 protease family, C-terminal catalytic domain [IPRO3663] (1)                                                                                                                                                                                                                              | -                         | C_unihh_00177_mRNA_29.1 | -                        |
| GF0035445 | 0                      | 1                  | 0                     | Hypothetical protein (1)                                          |                                                                                                                                                                                                                                            |                                                                                                                                                                                                                                                                                                                                                         |                           | C_unihh_00177_mRNA_20.1 | -                        |
| GF0035444 | 0                      | 1                  | 0                     | Hypothetical protein (1)                                          |                                                                                                                                                                                                                                            |                                                                                                                                                                                                                                                                                                                                                         |                           | C_unihh_00177_mRNA_16.1 | -                        |
| GF0035443 | 0                      | 1                  | 0                     | Hypothetical protein (1)                                          |                                                                                                                                                                                                                                            |                                                                                                                                                                                                                                                                                                                                                         |                           | C_unihh_00177_mRNA_11.1 | -                        |
| GF0035442 | 0                      | 1                  | 0                     | Hypothetical protein (1)                                          |                                                                                                                                                                                                                                            | Retrotransposon gag domain [IPRO05162] (1)                                                                                                                                                                                                                                                                                                              | -                         | C_unihh_00176_mRNA_9.1  | -                        |
| GF0035441 | 0                      | 1                  | 0                     | Hypothetical protein (1)                                          |                                                                                                                                                                                                                                            | Reverse transcriptase domain [IPRO06477] (1)                                                                                                                                                                                                                                                                                                            | -                         | C_unihh_00176_mRNA_7.1  | -                        |
| GF0035440 | 0                      | 1                  | 0                     | Hypothetical protein (1)                                          |                                                                                                                                                                                                                                            |                                                                                                                                                                                                                                                                                                                                                         |                           | C_unihh_00176_mRNA_6.1  | -                        |
| GF0035439 | 0                      | 1                  | 0                     | Hypothetical protein (1)                                          |                                                                                                                                                                                                                                            |                                                                                                                                                                                                                                                                                                                                                         |                           | C_unihh_00176_mRNA_50.1 | -                        |
| GF0035438 | 0                      | 1                  | 0                     | Hypothetical protein (1)                                          |                                                                                                                                                                                                                                            | Retrotransposon gag domain [IPRO05162] (1)                                                                                                                                                                                                                                                                                                              | -                         | C_unihh_00176_mRNA_5.1  | -                        |
| GF0035437 | 0                      | 1                  | 0                     | Hypothetical protein (1)                                          |                                                                                                                                                                                                                                            |                                                                                                                                                                                                                                                                                                                                                         |                           | C_unihh_00176_mRNA_39.1 | -                        |
| GF0035436 | 0                      | 1                  | 0                     | Hypothetical protein (1)                                          |                                                                                                                                                                                                                                            |                                                                                                                                                                                                                                                                                                                                                         |                           | C_unihh_00176_mRNA_29.1 | -                        |
| GF0035435 | 0                      | 1                  | 0                     | Hypothetical protein (1)                                          | nucleic acid binding [GO:0003676 molecular_function] (1); zinc ion binding [GO:000870 molecular_function] (1)                                                                                                                              | Zinc finger, CCHC-type [IPRO01878] (1)                                                                                                                                                                                                                                                                                                                  | -                         | C_unihh_00176_mRNA_18.1 | -                        |
| GF0035434 | 0                      | 1                  | 0                     | Hypothetical protein (1)                                          |                                                                                                                                                                                                                                            |                                                                                                                                                                                                                                                                                                                                                         |                           | C_unihh_00176_mRNA_17.1 | -                        |
| GF0035433 | 0                      | 1                  | 0                     | Hypothetical protein (1)                                          |                                                                                                                                                                                                                                            |                                                                                                                                                                                                                                                                                                                                                         |                           | C_unihh_00176_mRNA_14.1 | -                        |
| GF0035432 | 0                      | 1                  | 0                     | Hypothetical protein (1)                                          |                                                                                                                                                                                                                                            |                                                                                                                                                                                                                                                                                                                                                         |                           | C_unihh_00175_mRNA_8.1  | -                        |
| GF0035431 | 0                      | 1                  | 0                     | TIR-NBS-LRR type disease resistance protein (1)                   | signal transduction [GO:0007165 biological_process] (1); protein binding [GO:0005515 molecular_function] (1)                                                                                                                               | Leucine-rich repeat domain, I domain-like [IPRO26751] (1); Leucine-rich repeat, typical subtype [IPRO03911] (1); Toll/interleukin-1 receptor homology (TIR) domain [IPRO01571] (1); Leucine-rich repeat [IPRO01611] (1)                                                                                                                                 | -                         | C_unihh_00175_mRNA_7.1  | -                        |
| GF0035430 | 0                      | 1                  | 0                     | Oligopeptide transporter 7 (1)                                    | transmembrane transport [GO:0005085 biological_process] (1)                                                                                                                                                                                | Oligopeptide transporter, OPT superfamily [IPRO04013] (1)                                                                                                                                                                                                                                                                                               | -                         | C_unihh_00175_mRNA_36.1 | -                        |
| GF0035429 | 0                      | 1                  | 0                     | Hypothetical protein (1)                                          |                                                                                                                                                                                                                                            |                                                                                                                                                                                                                                                                                                                                                         |                           | C_unihh_00175_mRNA_27.1 | -                        |
| GF0035428 | 0                      | 1                  | 0                     | Hypothetical protein (1)                                          |                                                                                                                                                                                                                                            |                                                                                                                                                                                                                                                                                                                                                         |                           | C_unihh_00175_mRNA_25.1 | -                        |
| GF0035427 | 0                      | 1                  | 0                     | Ribonuclease H-like superfamily protein (1)                       |                                                                                                                                                                                                                                            | Reverse transcriptase zinc-binding domain [IPRO26960] (1)                                                                                                                                                                                                                                                                                               | -                         | C_unihh_00175_mRNA_24.1 | -                        |
| GF0035426 | 0                      | 1                  | 0                     | Hypothetical protein (1)                                          |                                                                                                                                                                                                                                            | FCP1 homology domain [IPRO04274] (1); HAD-like domain [IPRO23214] (1)                                                                                                                                                                                                                                                                                   | -                         | C_unihh_00175_mRNA_23.1 | -                        |
| GF0035425 | 0                      | 1                  | 0                     | Hypothetical protein (1)                                          |                                                                                                                                                                                                                                            |                                                                                                                                                                                                                                                                                                                                                         |                           | C_unihh_00175_mRNA_22.1 | -                        |
| GF0035424 | 0                      | 1                  | 0                     | Hypothetical protein (1)                                          |                                                                                                                                                                                                                                            |                                                                                                                                                                                                                                                                                                                                                         |                           | C_unihh_00175_mRNA_2.1  | -                        |
| GF0035423 | 0                      | 1                  | 0                     | Heat stress transcription factor B-4b, putative (1)               |                                                                                                                                                                                                                                            |                                                                                                                                                                                                                                                                                                                                                         |                           | C_unihh_00175_mRNA_18.1 | -                        |
| GF0035422 | 0                      | 1                  | 0                     | 60S ribosomal protein L18a.1 (1)                                  |                                                                                                                                                                                                                                            |                                                                                                                                                                                                                                                                                                                                                         |                           | C_unihh_00175_mRNA_11.1 | -                        |
| GF0035421 | 0                      | 1                  | 0                     | Hypothetical protein (1)                                          |                                                                                                                                                                                                                                            |                                                                                                                                                                                                                                                                                                                                                         |                           | C_unihh_00174_mRNA_6.1  | -                        |
| GF0035420 | 0                      | 1                  | 0                     | Hypothetical protein (1)                                          |                                                                                                                                                                                                                                            |                                                                                                                                                                                                                                                                                                                                                         |                           | C_unihh_00174_mRNA_59.1 | -                        |
| GF0035419 | 0                      | 1                  | 0                     | Hypothetical protein (1)                                          |                                                                                                                                                                                                                                            |                                                                                                                                                                                                                                                                                                                                                         |                           | C_unihh_00174_mRNA_58.1 | -                        |
| GF0035418 | 0                      | 1                  | 0                     | Hypothetical protein (1)                                          |                                                                                                                                                                                                                                            |                                                                                                                                                                                                                                                                                                                                                         |                           | C_unihh_00174_mRNA_55.1 | -                        |
| GF0035417 | 0                      | 1                  | 0                     | Hypothetical protein (1)                                          |                                                                                                                                                                                                                                            |                                                                                                                                                                                                                                                                                                                                                         |                           | C_unihh_00174_mRNA_54.1 | -                        |
| GF0035416 | 0                      | 1                  | 0                     | Hypothetical protein (1)                                          |                                                                                                                                                                                                                                            |                                                                                                                                                                                                                                                                                                                                                         |                           | C_unihh_00174_mRNA_53.1 | -                        |
| GF0035415 | 0                      | 1                  | 0                     | Hypothetical protein (1)                                          |                                                                                                                                                                                                                                            |                                                                                                                                                                                                                                                                                                                                                         |                           | C_unihh_00174_mRNA_52.1 | -                        |
| GF0035414 | 0                      | 1                  | 0                     | Hypothetical protein (1)                                          |                                                                                                                                                                                                                                            | Viral movement protein [IPRO28919] (1)                                                                                                                                                                                                                                                                                                                  | -                         | C_unihh_00174_mRNA_51.1 | -                        |
| GF0035413 | 0                      | 1                  | 0                     | Hypothetical protein (1)                                          |                                                                                                                                                                                                                                            |                                                                                                                                                                                                                                                                                                                                                         |                           | C_unihh_00174_mRNA_49.1 | -                        |
| GF0035412 | 0                      | 1                  | 0                     | Hypothetical protein (1)                                          |                                                                                                                                                                                                                                            |                                                                                                                                                                                                                                                                                                                                                         |                           | C_unihh_00174_mRNA_47.1 | -                        |
| GF0035411 | 0                      | 1                  | 0                     | Hypothetical protein (1)                                          |                                                                                                                                                                                                                                            |                                                                                                                                                                                                                                                                                                                                                         |                           | C_unihh_00174_mRNA_44.1 | -                        |
| GF0035410 | 0                      | 1                  | 0                     | Hypothetical protein (1)                                          | proteolysis [GO:0006508 biological_process] (1); cysteine-type peptidase activity [GO:0008234 molecular_function] (1)                                                                                                                      | Ulp1 protease family, C-terminal catalytic domain [IPRO3663] (1)                                                                                                                                                                                                                                                                                        | -                         | C_unihh_00174_mRNA_42.1 | -                        |
| GF0035409 | 0                      | 1                  | 0                     | Hypothetical protein (1)                                          |                                                                                                                                                                                                                                            |                                                                                                                                                                                                                                                                                                                                                         |                           | C_unihh_00174_mRNA_41.1 | -                        |
| GF0035408 | 0                      | 1                  | 0                     | Hypothetical protein (1)                                          |                                                                                                                                                                                                                                            |                                                                                                                                                                                                                                                                                                                                                         |                           | C_unihh_00174_mRNA_38.1 | -                        |
| GF0035407 | 0                      | 1                  | 0                     | Hypothetical protein (1)                                          |                                                                                                                                                                                                                                            |                                                                                                                                                                                                                                                                                                                                                         |                           | C_unihh_00174_mRNA_37.1 | -                        |
| GF0035406 | 0                      | 1                  | 0                     | Hypothetical protein (1)                                          | nucleic acid binding [GO:0003676 molecular_function] (1)                                                                                                                                                                                   | Ribonuclease H-like domain [IPRO12337] (1)                                                                                                                                                                                                                                                                                                              | -                         | C_unihh_00174_mRNA_33.1 | -                        |
| GF0035405 | 0                      | 1                  | 0                     | Hypothetical protein (1)                                          |                                                                                                                                                                                                                                            |                                                                                                                                                                                                                                                                                                                                                         |                           | C_unihh_00174_mRNA_30.1 | -                        |
| GF0035404 | 0                      | 1                  | 0                     | Hypothetical protein (1)                                          |                                                                                                                                                                                                                                            |                                                                                                                                                                                                                                                                                                                                                         |                           | C_unihh_00174_mRNA_29.1 | -                        |
| GF0035403 | 0                      | 1                  | 0                     | Hypothetical protein (1)                                          |                                                                                                                                                                                                                                            |                                                                                                                                                                                                                                                                                                                                                         |                           | C_unihh_00174_mRNA_21.1 | -                        |
| GF0035402 | 0                      | 1                  | 0                     | Hypothetical protein (1)                                          |                                                                                                                                                                                                                                            |                                                                                                                                                                                                                                                                                                                                                         |                           | C_unihh_00174_mRNA_2.1  | -                        |
| GF0035401 | 0                      | 1                  | 0                     | Hypothetical protein (1)                                          |                                                                                                                                                                                                                                            | Chloramphenicol acetyltransferase-like domain [IPRO23213] (1)                                                                                                                                                                                                                                                                                           | -                         | C_unihh_00173_mRNA_8.1  | -                        |
| GF0035400 | 0                      | 1                  | 0                     | Hypothetical protein (1)                                          |                                                                                                                                                                                                                                            |                                                                                                                                                                                                                                                                                                                                                         |                           | C_unihh_00173_mRNA_41.1 | -                        |
| GF0035399 | 0                      | 1                  | 0                     | Hypothetical protein (1)                                          |                                                                                                                                                                                                                                            |                                                                                                                                                                                                                                                                                                                                                         |                           | C_unihh_00173_mRNA_39.1 | -                        |
| GF0035398 | 0                      | 1                  | 0                     | Hypothetical protein (1)                                          |                                                                                                                                                                                                                                            |                                                                                                                                                                                                                                                                                                                                                         |                           | C_unihh_00173_mRNA_35.1 | -                        |
| GF0035397 | 0                      | 1                  | 0                     | Hypothetical protein (1)                                          |                                                                                                                                                                                                                                            |                                                                                                                                                                                                                                                                                                                                                         |                           | C_unihh_00173_mRNA_3.1  | -                        |

| ID        | Num. in <i>C. crottensteini</i> | Num. in <i>C. auris</i> | Num. in <i>P. putrefactans</i> | Name                                                                 | GO                                                                                                                                                                                                                                                                                                                                                                                                                                       | InterPro                                                                                                                                                                                                                                                                                                                                                                               | Members in <i>C. crottensteini</i> | Members in <i>C. auris</i> | Members in <i>P. putrefactans</i> |
|-----------|---------------------------------|-------------------------|--------------------------------|----------------------------------------------------------------------|------------------------------------------------------------------------------------------------------------------------------------------------------------------------------------------------------------------------------------------------------------------------------------------------------------------------------------------------------------------------------------------------------------------------------------------|----------------------------------------------------------------------------------------------------------------------------------------------------------------------------------------------------------------------------------------------------------------------------------------------------------------------------------------------------------------------------------------|------------------------------------|----------------------------|-----------------------------------|
| GF003536  | 0                               | 1                       | 0                              | Cysteine/Histidine-rich C1 domain family protein (1)                 | oxidation-reduction process [GO:005114 biological process] (1); protein-kinase reductase activity [GO:0047134 molecular_function] (1)                                                                                                                                                                                                                                                                                                    | C1-like [IPR011424] (1)                                                                                                                                                                                                                                                                                                                                                                | -                                  | C_ushii_00173_mRNA_29.1    | -                                 |
| GF003539  | 0                               | 1                       | 0                              | Hypothetical protein (1)                                             | transferase activity, transferring acyl groups other than amino-acyl groups [GO:0016747 molecular_function] (1)                                                                                                                                                                                                                                                                                                                          | Transferase [IPR003480] (1); Ribosomal protein L18e.L15P [IPR021131] (1); Cholesterol-methyltransferase-like domain [IPR023213] (1)                                                                                                                                                                                                                                                    | -                                  | C_ushii_00173_mRNA_2.1     | -                                 |
| GF0035394 | 0                               | 1                       | 0                              | Hypothetical protein (1)                                             | -                                                                                                                                                                                                                                                                                                                                                                                                                                        | -                                                                                                                                                                                                                                                                                                                                                                                      | -                                  | C_ushii_00173_mRNA_17.1    | -                                 |
| GF0035393 | 0                               | 1                       | 0                              | Hypothetical protein (1)                                             | -                                                                                                                                                                                                                                                                                                                                                                                                                                        | -                                                                                                                                                                                                                                                                                                                                                                                      | -                                  | C_ushii_00173_mRNA_16.1    | -                                 |
| GF0035392 | 0                               | 1                       | 0                              | Oxalate oxidase 2 (1)                                                | manganese ion binding [GO:0030145 molecular_function] (1); nutrient reservoir roll fold [IPR014701] (1); Germin activity [GO:0045735 molecular_function] (1)                                                                                                                                                                                                                                                                             | Cupin 1 [IPR006045] (1); RmlC-like jelly roll fold [IPR014701] (1); Germin [IPR001829] (1); RmlC-like cupin domain [IPR011051] (1)                                                                                                                                                                                                                                                     | -                                  | C_ushii_00173_mRNA_1.1     | -                                 |
| GF0035391 | 0                               | 1                       | 0                              | Hypothetical protein (1)                                             | -                                                                                                                                                                                                                                                                                                                                                                                                                                        | -                                                                                                                                                                                                                                                                                                                                                                                      | -                                  | C_ushii_00172_mRNA_37.1    | -                                 |
| GF0035390 | 0                               | 1                       | 0                              | Hypothetical protein (1)                                             | -                                                                                                                                                                                                                                                                                                                                                                                                                                        | -                                                                                                                                                                                                                                                                                                                                                                                      | -                                  | C_ushii_00172_mRNA_34.1    | -                                 |
| GF0035389 | 0                               | 1                       | 0                              | Hypothetical protein (1)                                             | -                                                                                                                                                                                                                                                                                                                                                                                                                                        | -                                                                                                                                                                                                                                                                                                                                                                                      | -                                  | C_ushii_00172_mRNA_30.1    | -                                 |
| GF0035388 | 0                               | 1                       | 0                              | Ubiquitin-specific protease family C19-related protein isoform 1 (1) | -                                                                                                                                                                                                                                                                                                                                                                                                                                        | -                                                                                                                                                                                                                                                                                                                                                                                      | -                                  | C_ushii_00172_mRNA_17.1    | -                                 |
| GF0035387 | 0                               | 1                       | 0                              | Hypothetical protein (1)                                             | nucleic acid binding [GO:0003676 molecular_function] (1); zinc ion binding [GO:0005270 molecular_function] (1)                                                                                                                                                                                                                                                                                                                           | Zinc finger, CCHC-type [IPR001878] (1)                                                                                                                                                                                                                                                                                                                                                 | -                                  | C_ushii_00171_mRNA_40.1    | -                                 |
| GF0035386 | 0                               | 1                       | 0                              | Hypothetical protein (1)                                             | -                                                                                                                                                                                                                                                                                                                                                                                                                                        | -                                                                                                                                                                                                                                                                                                                                                                                      | -                                  | C_ushii_00171_mRNA_2.1     | -                                 |
| GF0035385 | 0                               | 1                       | 0                              | Hypothetical protein (1)                                             | -                                                                                                                                                                                                                                                                                                                                                                                                                                        | -                                                                                                                                                                                                                                                                                                                                                                                      | -                                  | C_ushii_00171_mRNA_13.1    | -                                 |
| GF0035384 | 0                               | 1                       | 0                              | Hypothetical protein (1)                                             | -                                                                                                                                                                                                                                                                                                                                                                                                                                        | -                                                                                                                                                                                                                                                                                                                                                                                      | -                                  | C_ushii_00171_mRNA_1.1     | -                                 |
| GF0035383 | 0                               | 1                       | 0                              | Hypothetical protein (1)                                             | -                                                                                                                                                                                                                                                                                                                                                                                                                                        | -                                                                                                                                                                                                                                                                                                                                                                                      | -                                  | C_ushii_00170_mRNA_4.1     | -                                 |
| GF0035382 | 0                               | 1                       | 0                              | Hypothetical protein (1)                                             | -                                                                                                                                                                                                                                                                                                                                                                                                                                        | -                                                                                                                                                                                                                                                                                                                                                                                      | -                                  | C_ushii_00170_mRNA_25.1    | -                                 |
| GF0035381 | 0                               | 1                       | 0                              | Hypothetical protein (1)                                             | -                                                                                                                                                                                                                                                                                                                                                                                                                                        | -                                                                                                                                                                                                                                                                                                                                                                                      | -                                  | C_ushii_00170_mRNA_23.1    | -                                 |
| GF0035380 | 0                               | 1                       | 0                              | NF-kappa-B inhibitor cactus (1)                                      | protein binding [GO:0005515 molecular_function] (1)                                                                                                                                                                                                                                                                                                                                                                                      | Ankyrin repeat [IPR02110] (1); PGG domain [IPR00981] (1); Ankyrin repeat-containing domain [IPR020883] (1)                                                                                                                                                                                                                                                                             | -                                  | C_ushii_00170_mRNA_20.1    | -                                 |
| GF0035379 | 0                               | 1                       | 0                              | Hypothetical protein (1)                                             | -                                                                                                                                                                                                                                                                                                                                                                                                                                        | -                                                                                                                                                                                                                                                                                                                                                                                      | -                                  | C_ushii_00169_mRNA_36.1    | -                                 |
| GF0035378 | 0                               | 1                       | 0                              | Hypothetical protein (1)                                             | -                                                                                                                                                                                                                                                                                                                                                                                                                                        | -                                                                                                                                                                                                                                                                                                                                                                                      | -                                  | C_ushii_00169_mRNA_33.1    | -                                 |
| GF0035377 | 0                               | 1                       | 0                              | Hypothetical protein (1)                                             | -                                                                                                                                                                                                                                                                                                                                                                                                                                        | -                                                                                                                                                                                                                                                                                                                                                                                      | -                                  | C_ushii_00169_mRNA_3.1     | -                                 |
| GF0035376 | 0                               | 1                       | 0                              | Hypothetical protein (1)                                             | -                                                                                                                                                                                                                                                                                                                                                                                                                                        | -                                                                                                                                                                                                                                                                                                                                                                                      | -                                  | C_ushii_00169_mRNA_24.1    | -                                 |
| GF0035375 | 0                               | 1                       | 0                              | Hypothetical protein (1)                                             | -                                                                                                                                                                                                                                                                                                                                                                                                                                        | -                                                                                                                                                                                                                                                                                                                                                                                      | -                                  | C_ushii_00169_mRNA_19.1    | -                                 |
| GF0035374 | 0                               | 1                       | 0                              | Myocardin (1)                                                        | -                                                                                                                                                                                                                                                                                                                                                                                                                                        | -                                                                                                                                                                                                                                                                                                                                                                                      | -                                  | C_ushii_00169_mRNA_14.1    | -                                 |
| GF0035373 | 0                               | 1                       | 0                              | Hypothetical protein (1)                                             | -                                                                                                                                                                                                                                                                                                                                                                                                                                        | -                                                                                                                                                                                                                                                                                                                                                                                      | -                                  | C_ushii_00169_mRNA_10.1    | -                                 |
| GF0035372 | 0                               | 1                       | 0                              | Hypothetical protein (1)                                             | -                                                                                                                                                                                                                                                                                                                                                                                                                                        | -                                                                                                                                                                                                                                                                                                                                                                                      | -                                  | C_ushii_00168_mRNA_4.1     | -                                 |
| GF0035371 | 0                               | 1                       | 0                              | Maternal effect embryo arrest protein (1)                            | -                                                                                                                                                                                                                                                                                                                                                                                                                                        | -                                                                                                                                                                                                                                                                                                                                                                                      | -                                  | C_ushii_00168_mRNA_17.1    | -                                 |
| GF0035370 | 0                               | 1                       | 0                              | Hypothetical protein (1)                                             | -                                                                                                                                                                                                                                                                                                                                                                                                                                        | -                                                                                                                                                                                                                                                                                                                                                                                      | -                                  | C_ushii_00167_mRNA_25.1    | -                                 |
| GF0035369 | 0                               | 1                       | 0                              | Hypothetical protein (1)                                             | -                                                                                                                                                                                                                                                                                                                                                                                                                                        | -                                                                                                                                                                                                                                                                                                                                                                                      | -                                  | C_ushii_00167_mRNA_19.1    | -                                 |
| GF0035368 | 0                               | 1                       | 0                              | Retrotransposon gag protein (1)                                      | -                                                                                                                                                                                                                                                                                                                                                                                                                                        | -                                                                                                                                                                                                                                                                                                                                                                                      | -                                  | C_ushii_00167_mRNA_14.1    | -                                 |
| GF0035367 | 0                               | 1                       | 0                              | Hypothetical protein (1)                                             | nucleic acid binding [GO:0003676 molecular_function] (1)                                                                                                                                                                                                                                                                                                                                                                                 | Zinc knuckle CXXCX4HXAC [IPR025836] (1); Ribonuclease H-like domain [IPR025237] (1); Domain of unknown function DUF4283 [IPR025588] (1)                                                                                                                                                                                                                                                | -                                  | C_ushii_00166_mRNA_50.1    | -                                 |
| GF0035366 | 0                               | 1                       | 0                              | Hypothetical protein (1)                                             | phospholipid-transporting ATPase activity [GO:0004012 molecular_function] (1); metal ion binding [GO:0046872 molecular_function] (1); magnesium ion binding [GO:0000287 molecular_function] (1); integral component of membrane [GO:0016021 cellular_component] (1); phospholipid transport [GO:0015914 biological_process] (1); nucleotide binding [GO:0000166 molecular_function] (1); ATP binding [GO:0005224 molecular_function] (1) | P-type ATPase, C-terminal [IPR023630] (1); P-type ATPase [IPR001757] (1); P-type ATPase, subfamily IV [IPR006539] (1); HAT-like domain [IPR023141] (1); P-type ATPase, N-terminal [IPR032613] (1); P-type ATPase, A domain [IPR006260] (1)                                                                                                                                             | -                                  | C_ushii_00166_mRNA_31.1    | -                                 |
| GF0035365 | 0                               | 1                       | 0                              | Eukaryotic initiation factor 4A-10 (1)                               | nucleic acid binding [GO:0003676 molecular_function] (1); ATP binding [GO:0005224 molecular_function] (1)                                                                                                                                                                                                                                                                                                                                | RNA helicase, DEAD-box type, O motif [IPR014014] (1); Helicase superfamily 1/2, ATP-binding domain [IPR014001] (1); ATP-dependent RNA helicase [IPR000629] (1); P-loop containing nucleoside triphosphate hydrolase [IPR027417] (1); DEAD/DEAF box helicase domain [IPR011451] (1)                                                                                                     | -                                  | C_ushii_00166_mRNA_28.1    | -                                 |
| GF0035364 | 0                               | 1                       | 0                              | Putative telomere repeat-binding factor 4-like (1)                   | nucleosome [GO:0000786 cellular_component] (1); nucleus [GO:0005634 cellular_component] (1); DNA binding [GO:0003677 molecular_function] (1); nucleosome assembly [GO:0006324 biological_process] (1)                                                                                                                                                                                                                                    | Linker histone H1/H5 domain H15 [IPR008181] (1); SANT/Myb domain [IPR001051] (1); Winged helix-turn-helix DNA-binding domain [IPR011911] (1); Homeodomain-like [IPR009571] (1); Myb domain [IPR017930] (1)                                                                                                                                                                             | -                                  | C_ushii_00166_mRNA_27.2    | -                                 |
| GF0035363 | 0                               | 1                       | 0                              | Hypothetical protein (1)                                             | nucleus [GO:0005634 cellular_component] (1); ATPase activity [GO:0016887 molecular_function] (1); ribosomal large subunit assembly [GO:0000027 biological_process] (1)                                                                                                                                                                                                                                                                   | von Willbrand factor, type A [IPR020035] (1); Mdsian [IPR012099] (1)                                                                                                                                                                                                                                                                                                                   | -                                  | C_ushii_00166_mRNA_13.1    | -                                 |
| GF0035362 | 0                               | 1                       | 0                              | Hypothetical protein (1)                                             | -                                                                                                                                                                                                                                                                                                                                                                                                                                        | -                                                                                                                                                                                                                                                                                                                                                                                      | -                                  | C_ushii_00166_mRNA_11.1    | -                                 |
| GF0035361 | 0                               | 1                       | 0                              | GDSL esterase/lipase 5 (1)                                           | hydrolase activity, acting on ester bonds [GO:0016788 molecular_function] (1)                                                                                                                                                                                                                                                                                                                                                            | Mitochondrial carrier domain [IPR023395] (1); Mitochondrial substrate/solute carrier [IPR018108] (1)                                                                                                                                                                                                                                                                                   | -                                  | C_ushii_00166_mRNA_1.1     | -                                 |
| GF0035360 | 0                               | 1                       | 0                              | Hypothetical protein (1)                                             | -                                                                                                                                                                                                                                                                                                                                                                                                                                        | -                                                                                                                                                                                                                                                                                                                                                                                      | -                                  | C_ushii_00165_mRNA_3.1     | -                                 |
| GF0035359 | 0                               | 1                       | 0                              | Hypothetical protein (1)                                             | -                                                                                                                                                                                                                                                                                                                                                                                                                                        | -                                                                                                                                                                                                                                                                                                                                                                                      | -                                  | C_ushii_00165_mRNA_25.1    | -                                 |
| GF0035358 | 0                               | 1                       | 0                              | Hypothetical protein (1)                                             | -                                                                                                                                                                                                                                                                                                                                                                                                                                        | -                                                                                                                                                                                                                                                                                                                                                                                      | -                                  | C_ushii_00165_mRNA_23.1    | -                                 |
| GF0035357 | 0                               | 1                       | 0                              | Hypothetical protein (1)                                             | -                                                                                                                                                                                                                                                                                                                                                                                                                                        | -                                                                                                                                                                                                                                                                                                                                                                                      | -                                  | C_ushii_00165_mRNA_2.1     | -                                 |
| GF0035356 | 0                               | 1                       | 0                              | Ankyrin repeat plate-like protein (1)                                | protein binding [GO:0005515 molecular_function] (1)                                                                                                                                                                                                                                                                                                                                                                                      | Ankyrin repeat-containing domain [IPR020883] (1); Ankyrin repeat [IPR02110] (1)                                                                                                                                                                                                                                                                                                        | -                                  | C_ushii_00165_mRNA_19.1    | -                                 |
| GF0035355 | 0                               | 1                       | 0                              | Hypothetical protein (1)                                             | polysaccharide binding [GO:0030247 molecular_function] (1)                                                                                                                                                                                                                                                                                                                                                                               | Wall-associated receptor kinase, galacturonan-binding domain [IPR025287] (1)                                                                                                                                                                                                                                                                                                           | -                                  | C_ushii_00165_mRNA_18.1    | -                                 |
| GF0035354 | 0                               | 1                       | 0                              | Hypothetical protein (1)                                             | -                                                                                                                                                                                                                                                                                                                                                                                                                                        | -                                                                                                                                                                                                                                                                                                                                                                                      | -                                  | C_ushii_00165_mRNA_14.1    | -                                 |
| GF0035353 | 0                               | 1                       | 0                              | Wall-associated receptor kinase (1)                                  | polysaccharide binding [GO:0030247 molecular_function] (1)                                                                                                                                                                                                                                                                                                                                                                               | Wall-associated receptor kinase, galacturonan-binding domain [IPR025287] (1)                                                                                                                                                                                                                                                                                                           | -                                  | C_ushii_00165_mRNA_13.1    | -                                 |
| GF0035352 | 0                               | 1                       | 0                              | Hypothetical protein (1)                                             | protein phosphorylation [GO:0006468 biological_process] (1); protein kinase activity [GO:0004672 molecular_function] (1); polysaccharide binding [GO:0030247 molecular_function] (1); ATP binding [GO:0005224 molecular_function] (1)                                                                                                                                                                                                    | Protein kinase domain [IPR000719] (1); Wall-associated receptor kinase, galacturonan-binding domain [IPR025287] (1); Protein kinase-like domain [IPR011099] (1); Serine/threonine-specificity protein kinase, catalytic domain [IPR02290] (1); Serine/threonine-protein kinase, active site [IPR008711] (1); Serine/threonine-tyrosine-protein kinase catalytic domain [IPR001245] (1) | -                                  | C_ushii_00165_mRNA_12.1    | -                                 |
| GF0035351 | 0                               | 1                       | 0                              | Hypothetical protein (1)                                             | -                                                                                                                                                                                                                                                                                                                                                                                                                                        | -                                                                                                                                                                                                                                                                                                                                                                                      | -                                  | C_ushii_00165_mRNA_11.1    | -                                 |
| GF0035350 | 0                               | 1                       | 0                              | Hypothetical protein (1)                                             | ATP binding [GO:0005224 molecular_function] (1); protein phosphorylation [GO:0006468 biological_process] (1); protein kinase activity [GO:0004672 molecular_function] (1)                                                                                                                                                                                                                                                                | Protein kinase domain [IPR000719] (1); Leucine-rich repeat domain, I domain-like [IPR023675] (1); Protein kinase-like domain [IPR011099] (1); Serine/threonine-protein kinase, active site [IPR008711] (1)                                                                                                                                                                             | -                                  | C_ushii_00164_mRNA_45.1    | -                                 |
| GF0035349 | 0                               | 1                       | 0                              | Mnator-like transposase (1)                                          | zinc ion binding [GO:0008270 molecular_function] (1)                                                                                                                                                                                                                                                                                                                                                                                     | MULE transposase domain [IPR018280] (1); Zinc finger, PMAZ-type [IPR006564] (1); Transposase, MuDR, plant [IPR003321] (1)                                                                                                                                                                                                                                                              | -                                  | C_ushii_00164_mRNA_44.1    | -                                 |
| GF0035348 | 0                               | 1                       | 0                              | Hypothetical protein (1)                                             | proteolysis [GO:0006508 biological_process] (1); cysteine-type peptidase activity [GO:0008234 molecular_function] (1)                                                                                                                                                                                                                                                                                                                    | Domain of unknown function DUF1985 [IPR015410] (1); Ulp1 protease family, C-terminal catalytic domain [IPR003653] (1)                                                                                                                                                                                                                                                                  | -                                  | C_ushii_00164_mRNA_43.1    | -                                 |
| GF0035347 | 0                               | 1                       | 0                              | Hypothetical protein (1)                                             | zinc ion binding [GO:0008270 molecular_function] (1)                                                                                                                                                                                                                                                                                                                                                                                     | Zinc finger, PMAZ-type [IPR006564] (1); Zinc finger, SWIM-type [IPR007527] (1)                                                                                                                                                                                                                                                                                                         | -                                  | C_ushii_00164_mRNA_39.1    | -                                 |
| GF0035346 | 0                               | 1                       | 0                              | Hypothetical protein (1)                                             | -                                                                                                                                                                                                                                                                                                                                                                                                                                        | -                                                                                                                                                                                                                                                                                                                                                                                      | -                                  | C_ushii_00164_mRNA_36.1    | -                                 |
| GF0035345 | 0                               | 1                       | 0                              | Hypothetical protein (1)                                             | -                                                                                                                                                                                                                                                                                                                                                                                                                                        | -                                                                                                                                                                                                                                                                                                                                                                                      | -                                  | C_ushii_00164_mRNA_30.1    | -                                 |
| GF0035344 | 0                               | 1                       | 0                              | Hypothetical protein (1)                                             | protein dimerization activity [GO:0046983 molecular_function] (1); nucleic acid binding [GO:0003676 molecular_function] (1)                                                                                                                                                                                                                                                                                                              | Ribonuclease H-like domain [IPR012337] (1); HAT, C-terminal dimerization domain [IPR008906] (1)                                                                                                                                                                                                                                                                                        | -                                  | C_ushii_00164_mRNA_11.1    | -                                 |
| GF0035343 | 0                               | 1                       | 0                              | Hypothetical protein (1)                                             | -                                                                                                                                                                                                                                                                                                                                                                                                                                        | -                                                                                                                                                                                                                                                                                                                                                                                      | -                                  | C_ushii_00163_mRNA_44.1    | -                                 |
| GF0035342 | 0                               | 1                       | 0                              | Oligopeptide transporter 4 (1)                                       | transmembrane transport [GO:0055085 biological_process] (1)                                                                                                                                                                                                                                                                                                                                                                              | Reverse transcriptase zinc-binding domain [IPR026960] (1); Tetrapeptide transporter, OPT1 lip4 [IPR004648] (1); Oligopeptide transporter, OPT superfamily [IPR004813] (1)                                                                                                                                                                                                              | -                                  | C_ushii_00163_mRNA_4.1     | -                                 |
| GF0035341 | 0                               | 1                       | 0                              | Hypothetical protein (1)                                             | -                                                                                                                                                                                                                                                                                                                                                                                                                                        | -                                                                                                                                                                                                                                                                                                                                                                                      | -                                  | C_ushii_00163_mRNA_2.1     | -                                 |
| GF0035340 | 0                               | 1                       | 0                              | Hypothetical protein (1)                                             | -                                                                                                                                                                                                                                                                                                                                                                                                                                        | -                                                                                                                                                                                                                                                                                                                                                                                      | -                                  | C_ushii_00163_mRNA_15.1    | -                                 |
| GF0035339 | 0                               | 1                       | 0                              | Hypothetical protein (1)                                             | -                                                                                                                                                                                                                                                                                                                                                                                                                                        | -                                                                                                                                                                                                                                                                                                                                                                                      | -                                  | C_ushii_00162_mRNA_7.1     | -                                 |
| GF0035338 | 0                               | 1                       | 0                              | Hypothetical protein (1)                                             | -                                                                                                                                                                                                                                                                                                                                                                                                                                        | -                                                                                                                                                                                                                                                                                                                                                                                      | -                                  | C_ushii_00162_mRNA_28.1    | -                                 |
| GF0035337 | 0                               | 1                       | 0                              | Hypothetical protein (1)                                             | -                                                                                                                                                                                                                                                                                                                                                                                                                                        | -                                                                                                                                                                                                                                                                                                                                                                                      | -                                  | C_ushii_00162_mRNA_26.1    | -                                 |
| GF0035336 | 0                               | 1                       | 0                              | Hypothetical protein (1)                                             | -                                                                                                                                                                                                                                                                                                                                                                                                                                        | -                                                                                                                                                                                                                                                                                                                                                                                      | -                                  | C_ushii_00162_mRNA_15.1    | -                                 |
| GF0035335 | 0                               | 1                       | 0                              | Hypothetical protein (1)                                             | -                                                                                                                                                                                                                                                                                                                                                                                                                                        | -                                                                                                                                                                                                                                                                                                                                                                                      | -                                  | C_ushii_00162_mRNA_12.1    | -                                 |
| GF0035334 | 0                               | 1                       | 0                              | Hypothetical protein (1)                                             | -                                                                                                                                                                                                                                                                                                                                                                                                                                        | -                                                                                                                                                                                                                                                                                                                                                                                      | -                                  | C_ushii_00161_mRNA_40.1    | -                                 |
| GF0035333 | 0                               | 1                       | 0                              | Hypothetical protein (1)                                             | -                                                                                                                                                                                                                                                                                                                                                                                                                                        | -                                                                                                                                                                                                                                                                                                                                                                                      | -                                  | C_ushii_00161_mRNA_32.1    | -                                 |
| GF0035332 | 0                               | 1                       | 0                              | Hypothetical protein (1)                                             | -                                                                                                                                                                                                                                                                                                                                                                                                                                        | -                                                                                                                                                                                                                                                                                                                                                                                      | -                                  | C_ushii_00161_mRNA_26.1    | -                                 |
| GF0035331 | 0                               | 1                       | 0                              | Hypothetical protein (1)                                             | -                                                                                                                                                                                                                                                                                                                                                                                                                                        | -                                                                                                                                                                                                                                                                                                                                                                                      | -                                  | C_ushii_00161_mRNA_23.1    | -                                 |
| GF0035330 | 0                               | 1                       | 0                              | Hypothetical protein (1)                                             | -                                                                                                                                                                                                                                                                                                                                                                                                                                        | -                                                                                                                                                                                                                                                                                                                                                                                      | -                                  | C_ushii_00161_mRNA_21.1    | -                                 |
| GF0035329 | 0                               | 1                       | 0                              | Hypothetical protein (1)                                             | -                                                                                                                                                                                                                                                                                                                                                                                                                                        | -                                                                                                                                                                                                                                                                                                                                                                                      | -                                  | C_ushii_00161_mRNA_15.1    | -                                 |

| ID       | Num. in C. crottenstei | Num. in C. auris | Num. in P. putida | Note                                                                    | GO                                                                                                                                                                                                                                     | InterPro                                                                                                                                                                                                                                                                                                              | Members in C. crottenstei | Members in C. auris      | Members in P. putida |
|----------|------------------------|------------------|-------------------|-------------------------------------------------------------------------|----------------------------------------------------------------------------------------------------------------------------------------------------------------------------------------------------------------------------------------|-----------------------------------------------------------------------------------------------------------------------------------------------------------------------------------------------------------------------------------------------------------------------------------------------------------------------|---------------------------|--------------------------|----------------------|
| GF003528 | 0                      | 1                | 0                 | Hypothetical protein (1)                                                |                                                                                                                                                                                                                                        |                                                                                                                                                                                                                                                                                                                       |                           | C_unihii_00161_mRNA_1.1  | -                    |
| GF003529 | 0                      | 1                | 0                 | Hypothetical protein (1)                                                |                                                                                                                                                                                                                                        | LOG family [IPR031100] (1)                                                                                                                                                                                                                                                                                            |                           | C_unihii_00160_mRNA_21.1 | -                    |
| GF003530 | 0                      | 1                | 0                 | Hypothetical protein (1)                                                |                                                                                                                                                                                                                                        |                                                                                                                                                                                                                                                                                                                       |                           | C_unihii_00160_mRNA_2.1  | -                    |
| GF003531 | 0                      | 1                | 0                 | Hypothetical protein (1)                                                | DNA-templated transcription, termination                                                                                                                                                                                               | Rho termination factor, N-terminal [IPR01112] (1)                                                                                                                                                                                                                                                                     |                           | C_unihii_00160_mRNA_16.1 | -                    |
| GF003532 | 0                      | 1                | 0                 | Hypothetical protein (1)                                                |                                                                                                                                                                                                                                        |                                                                                                                                                                                                                                                                                                                       |                           | C_unihii_00160_mRNA_11.1 | -                    |
| GF003533 | 0                      | 1                | 0                 | Hypothetical protein (1)                                                | nucleic acid binding [GO:0003676 molecular_function] (1)                                                                                                                                                                               | Ribonuclease H-like domain [IPR012337] (1); Domain of unknown function DUF4571 [IPR023398] (1)                                                                                                                                                                                                                        |                           | C_unihii_00159_mRNA_9.1  | -                    |
| GF003534 | 0                      | 1                | 0                 | Hypothetical protein (1)                                                |                                                                                                                                                                                                                                        |                                                                                                                                                                                                                                                                                                                       |                           | C_unihii_00159_mRNA_8.1  | -                    |
| GF003535 | 0                      | 1                | 0                 | Hypothetical protein (1)                                                |                                                                                                                                                                                                                                        |                                                                                                                                                                                                                                                                                                                       |                           | C_unihii_00159_mRNA_39.1 | -                    |
| GF003536 | 0                      | 1                | 0                 | Hypothetical protein (1)                                                |                                                                                                                                                                                                                                        |                                                                                                                                                                                                                                                                                                                       |                           | C_unihii_00159_mRNA_34.1 | -                    |
| GF003537 | 0                      | 1                | 0                 | Hypothetical protein (1)                                                |                                                                                                                                                                                                                                        | Leucine-rich repeat domain, L domain-like [IPR02675] (1)                                                                                                                                                                                                                                                              |                           | C_unihii_00159_mRNA_31.1 | -                    |
| GF003538 | 0                      | 1                | 0                 | Hypothetical protein (1)                                                | nucleic acid binding [GO:0003676 molecular_function] (1); DNA binding [GO:0003677 molecular_function] (1)                                                                                                                              | Ribonuclease H-like domain [IPR012337] (1); Zinc finger, BHLH-type [IPR03656] (1)                                                                                                                                                                                                                                     |                           | C_unihii_00159_mRNA_30.1 | -                    |
| GF003539 | 0                      | 1                | 0                 | Hypothetical protein (1)                                                |                                                                                                                                                                                                                                        |                                                                                                                                                                                                                                                                                                                       |                           | C_unihii_00159_mRNA_29.1 | -                    |
| GF003540 | 0                      | 1                | 0                 | Hypothetical protein (1)                                                |                                                                                                                                                                                                                                        |                                                                                                                                                                                                                                                                                                                       |                           | C_unihii_00159_mRNA_28.1 | -                    |
| GF003541 | 0                      | 1                | 0                 | Hypothetical protein (1)                                                |                                                                                                                                                                                                                                        | Reverse transcriptase zinc-binding domain [IPR02960] (1); Endonuclease/exonuclease/phosphatase [IPR005135] (1)                                                                                                                                                                                                        |                           | C_unihii_00159_mRNA_24.1 | -                    |
| GF003542 | 0                      | 1                | 0                 | Hypothetical protein (1)                                                |                                                                                                                                                                                                                                        |                                                                                                                                                                                                                                                                                                                       |                           | C_unihii_00159_mRNA_2.1  | -                    |
| GF003543 | 0                      | 1                | 0                 | Hypothetical protein (1)                                                |                                                                                                                                                                                                                                        |                                                                                                                                                                                                                                                                                                                       |                           | C_unihii_00159_mRNA_10.1 | -                    |
| GF003544 | 0                      | 1                | 0                 | Hypothetical protein (1)                                                |                                                                                                                                                                                                                                        |                                                                                                                                                                                                                                                                                                                       |                           | C_unihii_00158_mRNA_7.1  | -                    |
| GF003545 | 0                      | 1                | 0                 | Hypothetical protein (1)                                                |                                                                                                                                                                                                                                        |                                                                                                                                                                                                                                                                                                                       |                           | C_unihii_00158_mRNA_6.1  | -                    |
| GF003546 | 0                      | 1                | 0                 | Disease resistance-responsive family protein (1)                        |                                                                                                                                                                                                                                        | Plant disease resistance response protein [IPR04265] (1)                                                                                                                                                                                                                                                              |                           | C_unihii_00158_mRNA_50.1 | -                    |
| GF003547 | 0                      | 1                | 0                 | Hypothetical protein (1)                                                | cytostatin [GO:0006887 biological_process] (1); cytosol [GO:0000145 cellular_component] (1)                                                                                                                                            | Enoyl-CoA hydratase/peptide lyase [IPR00440] (1); Cullin repeat-like-containing domain [IPR01619] (1)                                                                                                                                                                                                                 |                           | C_unihii_00158_mRNA_45.1 | -                    |
| GF003548 | 0                      | 1                | 0                 | Hypothetical protein (1)                                                |                                                                                                                                                                                                                                        | Cation-transporting P-type ATPase, N-terminal [IPR004014] (1)                                                                                                                                                                                                                                                         |                           | C_unihii_00158_mRNA_36.1 | -                    |
| GF003549 | 0                      | 1                | 0                 | Hypothetical protein (1)                                                |                                                                                                                                                                                                                                        | P-type ATPase [IPR001757] (1); P-type ATPase, transmembrane domain [IPR023298] (1); Cation-transporting P-type ATPase, C-terminal [IPR006060] (1); HAD-like domain [IPR023254] (1)                                                                                                                                    |                           | C_unihii_00158_mRNA_35.1 | -                    |
| GF003550 | 0                      | 1                | 0                 | Calcium-transporting ATPase 4, endoplasmic reticulum-type, putative (1) | integral component of membrane [GO:0016021 cellular_component] (1)                                                                                                                                                                     |                                                                                                                                                                                                                                                                                                                       |                           | C_unihii_00158_mRNA_3.1  | -                    |
| GF003551 | 0                      | 1                | 0                 | Laccase (1)                                                             | copper ion binding [GO:0005507 molecular_function] (1); oxidoreductase activity [GO:0016991 molecular_function] (1); oxidation-reduction process [GO:005114 biological_process] (1)                                                    | Multicopper oxidase, type 1 [IPR001117] (1); Cuproprotein [IPR008972] (1); Multicopper oxidase, type 3 [IPR011707] (1)                                                                                                                                                                                                |                           | C_unihii_00158_mRNA_27.1 | -                    |
| GF003552 | 0                      | 1                | 0                 | Reticulon-like protein R21 (1)                                          |                                                                                                                                                                                                                                        | Reticulon [IPR003388] (1)                                                                                                                                                                                                                                                                                             |                           | C_unihii_00158_mRNA_2.1  | -                    |
| GF003553 | 0                      | 1                | 0                 | Disease resistance family protein / LRR family protein, putative (1)    | protein binding [GO:0005515 molecular_function] (1)                                                                                                                                                                                    | Leucine-rich repeat domain, L domain-like [IPR02675] (1); Leucine-rich repeat-containing N-terminal plant-type [IPR01611] (1)                                                                                                                                                                                         |                           | C_unihii_00157_mRNA_9.1  | -                    |
| GF003554 | 0                      | 1                | 0                 | Hypothetical protein (1)                                                |                                                                                                                                                                                                                                        |                                                                                                                                                                                                                                                                                                                       |                           | C_unihii_00157_mRNA_5.1  | -                    |
| GF003555 | 0                      | 1                | 0                 | Hypothetical protein (1)                                                |                                                                                                                                                                                                                                        | Domain of unknown function DUF4283 [IPR025558] (1)                                                                                                                                                                                                                                                                    |                           | C_unihii_00157_mRNA_39.1 | -                    |
| GF003556 | 0                      | 1                | 0                 | Hypothetical protein (1)                                                |                                                                                                                                                                                                                                        |                                                                                                                                                                                                                                                                                                                       |                           | C_unihii_00157_mRNA_31.1 | -                    |
| GF003557 | 0                      | 1                | 0                 | Hypothetical protein (1)                                                |                                                                                                                                                                                                                                        |                                                                                                                                                                                                                                                                                                                       |                           | C_unihii_00157_mRNA_3.1  | -                    |
| GF003558 | 0                      | 1                | 0                 | Hypothetical protein (1)                                                |                                                                                                                                                                                                                                        |                                                                                                                                                                                                                                                                                                                       |                           | C_unihii_00157_mRNA_24.1 | -                    |
| GF003559 | 0                      | 1                | 0                 | Hypothetical protein (1)                                                |                                                                                                                                                                                                                                        |                                                                                                                                                                                                                                                                                                                       |                           | C_unihii_00157_mRNA_21.1 | -                    |
| GF003560 | 0                      | 1                | 0                 | Hypothetical protein (1)                                                |                                                                                                                                                                                                                                        |                                                                                                                                                                                                                                                                                                                       |                           | C_unihii_00157_mRNA_19.1 | -                    |
| GF003561 | 0                      | 1                | 0                 | Hypothetical protein (1)                                                |                                                                                                                                                                                                                                        |                                                                                                                                                                                                                                                                                                                       |                           | C_unihii_00157_mRNA_18.1 | -                    |
| GF003562 | 0                      | 1                | 0                 | Disease resistance family protein / LRR family protein, putative (1)    | protein binding [GO:0005515 molecular_function] (1)                                                                                                                                                                                    | Leucine-rich repeat domain, L domain-like [IPR02675] (1); Leucine-rich repeat-containing N-terminal plant-type [IPR01611] (1)                                                                                                                                                                                         |                           | C_unihii_00157_mRNA_15.1 | -                    |
| GF003563 | 0                      | 1                | 0                 | Hypothetical protein (1)                                                | protein binding [GO:0005515 molecular_function] (1)                                                                                                                                                                                    | Leucine-rich repeat domain, L domain-like [IPR02675] (1); Leucine-rich repeat-containing N-terminal plant-type [IPR012118] (1); Leucine-rich repeat [IPR01611] (1)                                                                                                                                                    |                           | C_unihii_00157_mRNA_14.1 | -                    |
| GF003564 | 0                      | 1                | 0                 | Hypothetical protein (1)                                                |                                                                                                                                                                                                                                        |                                                                                                                                                                                                                                                                                                                       |                           | C_unihii_00157_mRNA_13.1 | -                    |
| GF003565 | 0                      | 1                | 0                 | Hypothetical protein (1)                                                |                                                                                                                                                                                                                                        | Retromer/pag domain [IPR005162] (1)                                                                                                                                                                                                                                                                                   |                           | C_unihii_00157_mRNA_12.1 | -                    |
| GF003566 | 0                      | 1                | 0                 | Hypothetical protein (1)                                                |                                                                                                                                                                                                                                        |                                                                                                                                                                                                                                                                                                                       |                           | C_unihii_00157_mRNA_1.1  | -                    |
| GF003567 | 0                      | 1                | 0                 | Hypothetical protein (1)                                                |                                                                                                                                                                                                                                        |                                                                                                                                                                                                                                                                                                                       |                           | C_unihii_00156_mRNA_38.1 | -                    |
| GF003568 | 0                      | 1                | 0                 | Hypothetical protein (1)                                                |                                                                                                                                                                                                                                        |                                                                                                                                                                                                                                                                                                                       |                           | C_unihii_00156_mRNA_35.1 | -                    |
| GF003569 | 0                      | 1                | 0                 | Hypothetical protein (1)                                                |                                                                                                                                                                                                                                        |                                                                                                                                                                                                                                                                                                                       |                           | C_unihii_00156_mRNA_34.1 | -                    |
| GF003570 | 0                      | 1                | 0                 | Hypothetical protein (1)                                                |                                                                                                                                                                                                                                        |                                                                                                                                                                                                                                                                                                                       |                           | C_unihii_00156_mRNA_30.1 | -                    |
| GF003571 | 0                      | 1                | 0                 | Hypothetical protein (1)                                                |                                                                                                                                                                                                                                        |                                                                                                                                                                                                                                                                                                                       |                           | C_unihii_00156_mRNA_29.1 | -                    |
| GF003572 | 0                      | 1                | 0                 | Hypothetical protein (1)                                                |                                                                                                                                                                                                                                        | Reverse transcriptase domain [IPR00477] (4)                                                                                                                                                                                                                                                                           |                           | C_unihii_00156_mRNA_28.1 | -                    |
| GF003573 | 0                      | 1                | 0                 | Hypothetical protein (1)                                                |                                                                                                                                                                                                                                        |                                                                                                                                                                                                                                                                                                                       |                           | C_unihii_00156_mRNA_27.1 | -                    |
| GF003574 | 0                      | 1                | 0                 | Hypothetical protein (1)                                                |                                                                                                                                                                                                                                        |                                                                                                                                                                                                                                                                                                                       |                           | C_unihii_00156_mRNA_25.1 | -                    |
| GF003575 | 0                      | 1                | 0                 | Hypothetical protein (1)                                                |                                                                                                                                                                                                                                        |                                                                                                                                                                                                                                                                                                                       |                           | C_unihii_00156_mRNA_21.1 | -                    |
| GF003576 | 0                      | 1                | 0                 | Hypothetical protein (1)                                                |                                                                                                                                                                                                                                        | Retromer/pag domain [IPR005162] (1)                                                                                                                                                                                                                                                                                   |                           | C_unihii_00156_mRNA_16.1 | -                    |
| GF003577 | 0                      | 1                | 0                 | Hypothetical protein (1)                                                |                                                                                                                                                                                                                                        |                                                                                                                                                                                                                                                                                                                       |                           | C_unihii_00156_mRNA_14.1 | -                    |
| GF003578 | 0                      | 1                | 0                 | Hypothetical protein (1)                                                |                                                                                                                                                                                                                                        |                                                                                                                                                                                                                                                                                                                       |                           | C_unihii_00156_mRNA_13.1 | -                    |
| GF003579 | 0                      | 1                | 0                 | Hypothetical protein (1)                                                |                                                                                                                                                                                                                                        |                                                                                                                                                                                                                                                                                                                       |                           | C_unihii_00156_mRNA_12.1 | -                    |
| GF003580 | 0                      | 1                | 0                 | Hypothetical protein (1)                                                | nucleic acid binding [GO:0003676 molecular_function] (1); protein dimerization activity [GO:0046983 molecular_function] (1)                                                                                                            | Ribonuclease H-like domain [IPR012337] (1); HAT, C-terminal dimerization domain [IPR006060] (1)                                                                                                                                                                                                                       |                           | C_unihii_00155_mRNA_9.1  | -                    |
| GF003581 | 0                      | 1                | 0                 | Hypothetical protein (1)                                                |                                                                                                                                                                                                                                        |                                                                                                                                                                                                                                                                                                                       |                           | C_unihii_00155_mRNA_6.1  | -                    |
| GF003582 | 0                      | 1                | 0                 | Hypothetical protein (1)                                                |                                                                                                                                                                                                                                        |                                                                                                                                                                                                                                                                                                                       |                           | C_unihii_00155_mRNA_5.1  | -                    |
| GF003583 | 0                      | 1                | 0                 | Hypothetical protein (1)                                                |                                                                                                                                                                                                                                        |                                                                                                                                                                                                                                                                                                                       |                           | C_unihii_00155_mRNA_4.1  | -                    |
| GF003584 | 0                      | 1                | 0                 | Hypothetical protein (1)                                                |                                                                                                                                                                                                                                        |                                                                                                                                                                                                                                                                                                                       |                           | C_unihii_00155_mRNA_3.1  | -                    |
| GF003585 | 0                      | 1                | 0                 | Hypothetical protein (1)                                                |                                                                                                                                                                                                                                        |                                                                                                                                                                                                                                                                                                                       |                           | C_unihii_00155_mRNA_2.1  | -                    |
| GF003586 | 0                      | 1                | 0                 | Hypothetical protein (1)                                                |                                                                                                                                                                                                                                        |                                                                                                                                                                                                                                                                                                                       |                           | C_unihii_00155_mRNA_19.1 | -                    |
| GF003587 | 0                      | 1                | 0                 | Hypothetical protein (1)                                                |                                                                                                                                                                                                                                        |                                                                                                                                                                                                                                                                                                                       |                           | C_unihii_00155_mRNA_18.1 | -                    |
| GF003588 | 0                      | 1                | 0                 | Hypothetical protein (1)                                                |                                                                                                                                                                                                                                        |                                                                                                                                                                                                                                                                                                                       |                           | C_unihii_00155_mRNA_14.1 | -                    |
| GF003589 | 0                      | 1                | 0                 | Hypothetical protein (1)                                                |                                                                                                                                                                                                                                        |                                                                                                                                                                                                                                                                                                                       |                           | C_unihii_00154_mRNA_8.1  | -                    |
| GF003590 | 0                      | 1                | 0                 | Hypothetical protein (1)                                                |                                                                                                                                                                                                                                        |                                                                                                                                                                                                                                                                                                                       |                           | C_unihii_00154_mRNA_7.1  | -                    |
| GF003591 | 0                      | 1                | 0                 | Hypothetical protein (1)                                                |                                                                                                                                                                                                                                        |                                                                                                                                                                                                                                                                                                                       |                           | C_unihii_00154_mRNA_6.1  | -                    |
| GF003592 | 0                      | 1                | 0                 | Hypothetical protein (1)                                                | transporter activity [GO:0005215 molecular_function] (1); transmembrane transport [GO:0055085 biological_process] (1); mitochondrial inner membrane [GO:0000743 cellular_component] (1); transport [GO:0006810 biological_process] (1) | Endonuclease/exonuclease/phosphatase [IPR005135] (1); Mitochondrial carrier protein [IPR003077] (1); Reverse transcriptase zinc-binding domain [IPR02960] (1); Adenine nucleotide translocator 1 [IPR01131] (1); Mitochondrial substrate/solute carrier [IPR018108] (1); Mitochondrial carrier domain [IPR023398] (1) |                           | C_unihii_00154_mRNA_5.1  | -                    |
| GF003593 | 0                      | 1                | 0                 | Hypothetical protein (1)                                                |                                                                                                                                                                                                                                        |                                                                                                                                                                                                                                                                                                                       |                           | C_unihii_00154_mRNA_4.1  | -                    |
| GF003594 | 0                      | 1                | 0                 | Hypothetical protein (1)                                                |                                                                                                                                                                                                                                        |                                                                                                                                                                                                                                                                                                                       |                           | C_unihii_00154_mRNA_3.1  | -                    |
| GF003595 | 0                      | 1                | 0                 | Hypothetical protein (1)                                                |                                                                                                                                                                                                                                        |                                                                                                                                                                                                                                                                                                                       |                           | C_unihii_00154_mRNA_2.1  | -                    |
| GF003596 | 0                      | 1                | 0                 | Hypothetical protein (1)                                                | DNA binding [GO:0003677 molecular_function] (1); regulation of transcription, DNA-templated [GO:0003555 biological_process] (1)                                                                                                        | NAC domain [IPR003441] (1)                                                                                                                                                                                                                                                                                            |                           | C_unihii_00154_mRNA_41.1 | -                    |
| GF003597 | 0                      | 1                | 0                 | Hypothetical protein (1)                                                | nucleic acid binding [GO:0003676 molecular_function] (1)                                                                                                                                                                               |                                                                                                                                                                                                                                                                                                                       |                           | C_unihii_00154_mRNA_38.1 | -                    |
| GF003598 | 0                      | 1                | 0                 | Hypothetical protein (1)                                                | cell growth [GO:0016049 biological_process] (1); anchored component of membrane [GO:001225 cellular_component] (1); cellulose microfibril organization [GO:0010215 biological_process] (1)                                             | RNA recognition motif domain [IPR006040] (1); Nucleotide-binding alpha-beta plat domain [IPR012677] (1)                                                                                                                                                                                                               |                           | C_unihii_00154_mRNA_3.1  | -                    |
| GF003599 | 0                      | 1                | 0                 | Phytochelatin synthase-like protein (1)                                 |                                                                                                                                                                                                                                        | COBRA, plant [IPR006918] (1)                                                                                                                                                                                                                                                                                          |                           | C_unihii_00154_mRNA_13.1 | -                    |
| GF003600 | 0                      | 1                | 0                 | Hypothetical protein (1)                                                |                                                                                                                                                                                                                                        |                                                                                                                                                                                                                                                                                                                       |                           | C_unihii_00153_mRNA_47.1 | -                    |
| GF003601 | 0                      | 1                | 0                 | Hypothetical protein (1)                                                | phosphoric diester hydrolase activity [GO:0008181 molecular_function] (1); lipid metabolic process [GO:0006629 biological_process] (1)                                                                                                 | Phosphatidylserine-specific phospholipase C, X domain [IPR000909] (1); Pentasaccharide repeat [IPR000885] (1); PLC-like phosphodiesterase, TIM beta alpha-barrel domain [IPR017946] (4)                                                                                                                               |                           | C_unihii_00152_mRNA_6.1  | -                    |
| GF003602 | 0                      | 1                | 0                 | Hypothetical protein (1)                                                |                                                                                                                                                                                                                                        |                                                                                                                                                                                                                                                                                                                       |                           | C_unihii_00152_mRNA_58.1 | -                    |
| GF003603 | 0                      | 1                | 0                 | Putative non-LTR reverse transcriptase (1)                              | nucleic acid binding [GO:0003676 molecular_function] (1)                                                                                                                                                                               | Viral movement protein [IPR029191] (1); Ribonuclease H-like domain [IPR012337] (1); Reverse transcriptase zinc-binding domain [IPR02960] (1)                                                                                                                                                                          |                           | C_unihii_00152_mRNA_45.1 | -                    |
| GF003604 | 0                      | 1                | 0                 | Hypothetical protein (1)                                                | transferase activity, transferring hexosyl groups [GO:0016758 molecular_function] (1); metabolic process [GO:0008152 biological_process] (1)                                                                                           | UDP-glucuronosyl-UDP-galactose transferase [IPR002213] (1)                                                                                                                                                                                                                                                            |                           | C_unihii_00152_mRNA_31.1 | -                    |
| GF003605 | 0                      | 1                | 0                 | Hypothetical protein (1)                                                |                                                                                                                                                                                                                                        |                                                                                                                                                                                                                                                                                                                       |                           | C_unihii_00152_mRNA_3.1  | -                    |
| GF003606 | 0                      | 1                | 0                 | Hypothetical protein (1)                                                | vesicular proton-transporting V-type ATPase complex assembly [GO:0007072 biological_process] (1)                                                                                                                                       | Peptidase S8, subtilisin-related [IPR015001] (1); Peptidase S8 propeptide/protease inhibitor I9 [IPR010259] (1); Vacuolar ATPase assembly integral membrane protein Vsm21 [IPR019013] (1)                                                                                                                             |                           | C_unihii_00152_mRNA_3.1  | -                    |
| GF003607 | 0                      | 1                | 0                 | Subtilisin-like serine protease (1)                                     | proteolysis [GO:0006508 biological_process] (1); serine-type endopeptidase activity [GO:0004252 molecular_function] (1)                                                                                                                | Peptidase S8, subtilisin-related [IPR015001] (1); Peptidase S8S53 domain [IPR000209] (1); Peptidase S8 propeptide/protease inhibitor I9 [IPR010259] (1)                                                                                                                                                               |                           | C_unihii_00152_mRNA_2.1  | -                    |
| GF003608 | 0                      | 1                | 0                 | Hypothetical protein (1)                                                |                                                                                                                                                                                                                                        | Filament-like plant protein [IPR008587] (1)                                                                                                                                                                                                                                                                           |                           | C_unihii_00152_mRNA_17.1 | -                    |
| GF003609 | 0                      | 1                | 0                 | Hypothetical protein (1)                                                |                                                                                                                                                                                                                                        | Filament-like plant protein [IPR008587] (1)                                                                                                                                                                                                                                                                           |                           | C_unihii_00152_mRNA_16.1 | -                    |

| ID       | Num. in <i>C. crotolariae</i> | Num. in <i>C. canalis</i> | Num. in <i>P. trifidata</i> | Note                                                                    | GO                                                                                                                                                                                                                                                                                                                                                                                                                                                                                                                                                                                                                                                                       | InterPro                                                                                                                                                                                                                                                                                                                                                                                                                                                                                                                                             | Members in <i>Crotolariae</i> | Members in <i>Canalis</i> | Members in <i>Trifidata</i> |
|----------|-------------------------------|---------------------------|-----------------------------|-------------------------------------------------------------------------|--------------------------------------------------------------------------------------------------------------------------------------------------------------------------------------------------------------------------------------------------------------------------------------------------------------------------------------------------------------------------------------------------------------------------------------------------------------------------------------------------------------------------------------------------------------------------------------------------------------------------------------------------------------------------|------------------------------------------------------------------------------------------------------------------------------------------------------------------------------------------------------------------------------------------------------------------------------------------------------------------------------------------------------------------------------------------------------------------------------------------------------------------------------------------------------------------------------------------------------|-------------------------------|---------------------------|-----------------------------|
| GF003522 | 0                             | 1                         | 0                           | Hypothetical protein (1)                                                | nucleoside metabolic process [GO:000916 biological_process] (1); metabolic process [GO:0008132 biological_process] (1); 'de novo' pyrimidine nucleobase biosynthesis process [GO:0006207 biological_process] (1); cellular metabolic process [GO:0044237 biological_process] (1); catalytic activity [GO:0003824 molecular_function] (1); ornithine-5-phosphoribosyltransferase activity [GO:0004588 molecular_function] (1); ornithine-5-phosphoribosyltransferase activity [GO:0004590 molecular_function] (1); 'de novo' UMP biosynthetic process [GO:0043205 biological_process] (1); pyrimidine nucleoside biosynthetic process [GO:0006221 biological_process] (1) | Orotate phosphoribosyltransferase [IPR023013] (1); Ornithine 5-phosphoribosyltransferase [IPR04732] (1); Ribonucleoside phosphate binding barrel [IPR011060] (1); Orotate phosphoribosyltransferase domain [IPR004667] (1); Adenosine-type TIM barrel [IPR013785] (1); Phosphoribosyltransferase domain [IPR00836] (1); Ornithine 5-phosphoribosyltransferase active site [IPR018089] (1); Initiator factor 2B-related [IPR000649] (1); Phosphoribosyltransferase-like [IPR029671] (1); Ornithine 5-phosphoribosyltransferase domain [IPR001754] (1) | -                             | C_unihit_00151_mRNA_3,1   | -                           |
| GF003521 | 0                             | 1                         | 0                           | Chloroplast terpenoid cyclase (1)                                       | magnesium ion binding [GO:000287 molecular_function] (1); terpenoid synthase activity [GO:0010333 molecular_function] (1); lyase activity [GO:0016829 molecular_function] (1); metabolic process [GO:0008132 biological_process] (1)                                                                                                                                                                                                                                                                                                                                                                                                                                     | Isoprenoid synthase domain [IPR008949] (1); Terpenoid synthase, N-terminal domain [IPR019061] (1); Terpenoid synthase, metal-binding domain [IPR005630] (1); Terpenoid cyclase-protein prenyltransferase alpha-alpha toroid [IPR008930] (1)                                                                                                                                                                                                                                                                                                          | -                             | C_unihit_00151_mRNA_29,1  | -                           |
| GF003520 | 0                             | 1                         | 0                           | Hypothetical protein (1)                                                | metabolic process [GO:0008132 biological_process] (1); terpenoid synthase activity [GO:0010333 molecular_function] (1); lyase activity [GO:0016829 molecular_function] (1)                                                                                                                                                                                                                                                                                                                                                                                                                                                                                               | Terpenoid synthase, N-terminal domain [IPR019061] (1); Terpenoid cyclase/protein prenyltransferase alpha-alpha toroid [IPR008930] (1)                                                                                                                                                                                                                                                                                                                                                                                                                | -                             | C_unihit_00151_mRNA_26,1  | -                           |
| GF003524 | 0                             | 1                         | 0                           | Monosaccharide transport protein (1)                                    | Leguminosin group-45 secreted peptide (1)                                                                                                                                                                                                                                                                                                                                                                                                                                                                                                                                                                                                                                | -                                                                                                                                                                                                                                                                                                                                                                                                                                                                                                                                                    | -                             | C_unihit_00151_mRNA_24,1  | -                           |
| GF003527 | 0                             | 1                         | 0                           | Hypothetical protein (1)                                                | nucleic acid binding [GO:0003676 molecular_function] (1); zinc ion binding [GO:0008270 molecular_function] (1)                                                                                                                                                                                                                                                                                                                                                                                                                                                                                                                                                           | Zinc knuckle CX2CX4HX4C [IPR025836] (1); Zinc finger, CCCH-type [IPR001878] (1); Domain of unknown function DUF4283 [IPR025588] (1)                                                                                                                                                                                                                                                                                                                                                                                                                  | -                             | C_unihit_00151_mRNA_22,1  | -                           |
| GF003525 | 0                             | 1                         | 0                           | Hypothetical protein (1)                                                | -                                                                                                                                                                                                                                                                                                                                                                                                                                                                                                                                                                                                                                                                        | -                                                                                                                                                                                                                                                                                                                                                                                                                                                                                                                                                    | -                             | C_unihit_00151_mRNA_17,1  | -                           |
| GF003524 | 0                             | 1                         | 0                           | Hypothetical protein (1)                                                | -                                                                                                                                                                                                                                                                                                                                                                                                                                                                                                                                                                                                                                                                        | -                                                                                                                                                                                                                                                                                                                                                                                                                                                                                                                                                    | -                             | C_unihit_00151_mRNA_16,1  | -                           |
| GF003523 | 0                             | 1                         | 0                           | Hypothetical protein (1)                                                | -                                                                                                                                                                                                                                                                                                                                                                                                                                                                                                                                                                                                                                                                        | -                                                                                                                                                                                                                                                                                                                                                                                                                                                                                                                                                    | -                             | C_unihit_00151_mRNA_14,1  | -                           |
| GF003522 | 0                             | 1                         | 0                           | Hypothetical protein (1)                                                | -                                                                                                                                                                                                                                                                                                                                                                                                                                                                                                                                                                                                                                                                        | -                                                                                                                                                                                                                                                                                                                                                                                                                                                                                                                                                    | -                             | C_unihit_00151_mRNA_13,1  | -                           |
| GF003521 | 0                             | 1                         | 0                           | Hypothetical protein (1)                                                | -                                                                                                                                                                                                                                                                                                                                                                                                                                                                                                                                                                                                                                                                        | -                                                                                                                                                                                                                                                                                                                                                                                                                                                                                                                                                    | -                             | C_unihit_00150_mRNA_52,1  | -                           |
| GF003520 | 0                             | 1                         | 0                           | Hypothetical protein (1)                                                | -                                                                                                                                                                                                                                                                                                                                                                                                                                                                                                                                                                                                                                                                        | -                                                                                                                                                                                                                                                                                                                                                                                                                                                                                                                                                    | -                             | C_unihit_00150_mRNA_24,1  | -                           |
| GF003519 | 0                             | 1                         | 0                           | Hypothetical protein (1)                                                | protein binding [GO:0005515 molecular_function] (1)                                                                                                                                                                                                                                                                                                                                                                                                                                                                                                                                                                                                                      | F-box domain [IPR001810] (1)                                                                                                                                                                                                                                                                                                                                                                                                                                                                                                                         | -                             | C_unihit_00150_mRNA_14,1  | -                           |
| GF003528 | 0                             | 1                         | 0                           | 40S ribosomal protein S23 (1)                                           | small ribosomal subunit [GO:0015935 cellular_component] (1); ribosome [GO:0005840 cellular_component] (1); structural constituent of ribosome [GO:0003735 molecular_function] (1); intracellular [GO:0005622 cellular_component] (1); translation [GO:0006412 biological_process] (1)                                                                                                                                                                                                                                                                                                                                                                                    | Ribosomal protein S23, eukaryotic/archaea [IPR05680] (1); Ribosomal protein S12/S23 [IPR006032] (1); Nucleic acid-binding, OB-fold [IPR012440] (1)                                                                                                                                                                                                                                                                                                                                                                                                   | -                             | C_unihit_00149_mRNA_7,1   | -                           |
| GF003527 | 0                             | 1                         | 0                           | Cysteine-rich RLK 29 isoform 1 (1)                                      | protein kinase activity [GO:0004672 molecular_function] (1); protein phosphorylation [GO:0006468 biological_process] (1); ATP binding [GO:000524 molecular_function] (1)                                                                                                                                                                                                                                                                                                                                                                                                                                                                                                 | Serine/threonine-protein kinase, active site [IPR002711] (1); Serine/threonine-specific protein kinase, catalytic domain [IPR002290] (1); Serine/threonine-tyrosine-protein kinase catalytic domain [IPR001245] (1); Protein kinase domain [IPR000791] (1); Protein kinase-like domain [IPR01099] (1)                                                                                                                                                                                                                                                | -                             | C_unihit_00149_mRNA_36,1  | -                           |
| GF003526 | 0                             | 1                         | 0                           | Hypothetical protein (1)                                                | -                                                                                                                                                                                                                                                                                                                                                                                                                                                                                                                                                                                                                                                                        | -                                                                                                                                                                                                                                                                                                                                                                                                                                                                                                                                                    | -                             | C_unihit_00149_mRNA_35,1  | -                           |
| GF003525 | 0                             | 1                         | 0                           | Hypothetical protein (1)                                                | -                                                                                                                                                                                                                                                                                                                                                                                                                                                                                                                                                                                                                                                                        | -                                                                                                                                                                                                                                                                                                                                                                                                                                                                                                                                                    | -                             | C_unihit_00149_mRNA_34,1  | -                           |
| GF003524 | 0                             | 1                         | 0                           | AT1G67060 protein (1)                                                   | -                                                                                                                                                                                                                                                                                                                                                                                                                                                                                                                                                                                                                                                                        | -                                                                                                                                                                                                                                                                                                                                                                                                                                                                                                                                                    | -                             | C_unihit_00149_mRNA_33,1  | -                           |
| GF003523 | 0                             | 1                         | 0                           | Hypothetical protein (1)                                                | ribosome [GO:0005840 cellular_component] (1); intracellular [GO:0005622 cellular_component] (1); translation [GO:0006412 biological_process] (1); structural constituent of ribosome [GO:0003735 molecular_function] (1)                                                                                                                                                                                                                                                                                                                                                                                                                                                 | Ribosomal protein S7c [IPR000554] (1); MULE transposase domain [IPR018289] (1)                                                                                                                                                                                                                                                                                                                                                                                                                                                                       | -                             | C_unihit_00149_mRNA_32,1  | -                           |
| GF003522 | 0                             | 1                         | 0                           | Hypothetical protein (1)                                                | thiol-dependent ubiquitous hydrolase activity [GO:0003649 molecular_function] (1); protein deubiquitination [GO:0016579 biological_process] (1)                                                                                                                                                                                                                                                                                                                                                                                                                                                                                                                          | Peptidase C19, ubiquitin carboxyl-terminal hydrolase [IPR013941] (1); Ubiquitin specific protease domain [IPR028889] (1)                                                                                                                                                                                                                                                                                                                                                                                                                             | -                             | C_unihit_00149_mRNA_27,1  | -                           |
| GF003521 | 0                             | 1                         | 0                           | Hypothetical protein (1)                                                | nucleic acid binding [GO:0003676 molecular_function] (1); protein dimerization activity [GO:0040983 molecular_function] (1); zinc ion binding [GO:0008270 molecular_function] (1)                                                                                                                                                                                                                                                                                                                                                                                                                                                                                        | Ribonuclease H-like domain [IPR012337] (1); HAT, C-terminal dimerization domain [IPR008906] (1); Zinc finger, CCCH-type [IPR001878] (1)                                                                                                                                                                                                                                                                                                                                                                                                              | -                             | C_unihit_00149_mRNA_25,1  | -                           |
| GF003520 | 0                             | 1                         | 0                           | Hypothetical protein (1)                                                | -                                                                                                                                                                                                                                                                                                                                                                                                                                                                                                                                                                                                                                                                        | -                                                                                                                                                                                                                                                                                                                                                                                                                                                                                                                                                    | -                             | C_unihit_00149_mRNA_23,1  | -                           |
| GF003529 | 0                             | 1                         | 0                           | Hypothetical protein (1)                                                | DNA binding [GO:0003677 molecular_function] (1); regulation of transcription, DNA-templated [GO:0006355 biological_process] (1)                                                                                                                                                                                                                                                                                                                                                                                                                                                                                                                                          | Domain of unknown function DUF1985 [IPR015410] (1); NAC domain [IPR003441] (1)                                                                                                                                                                                                                                                                                                                                                                                                                                                                       | -                             | C_unihit_00149_mRNA_10,1  | -                           |
| GF003527 | 0                             | 1                         | 0                           | No apical meristem family protein (1)                                   | -                                                                                                                                                                                                                                                                                                                                                                                                                                                                                                                                                                                                                                                                        | -                                                                                                                                                                                                                                                                                                                                                                                                                                                                                                                                                    | -                             | C_unihit_00148_mRNA_8,1   | -                           |
| GF003526 | 0                             | 1                         | 0                           | Hypothetical protein (1)                                                | -                                                                                                                                                                                                                                                                                                                                                                                                                                                                                                                                                                                                                                                                        | -                                                                                                                                                                                                                                                                                                                                                                                                                                                                                                                                                    | -                             | C_unihit_00148_mRNA_7,1   | -                           |
| GF003525 | 0                             | 1                         | 0                           | Hypothetical protein (1)                                                | -                                                                                                                                                                                                                                                                                                                                                                                                                                                                                                                                                                                                                                                                        | -                                                                                                                                                                                                                                                                                                                                                                                                                                                                                                                                                    | -                             | C_unihit_00148_mRNA_5,1   | -                           |
| GF003524 | 0                             | 1                         | 0                           | Hypothetical protein (1)                                                | -                                                                                                                                                                                                                                                                                                                                                                                                                                                                                                                                                                                                                                                                        | -                                                                                                                                                                                                                                                                                                                                                                                                                                                                                                                                                    | -                             | C_unihit_00148_mRNA_4,1   | -                           |
| GF003523 | 0                             | 1                         | 0                           | Hypothetical protein (1)                                                | -                                                                                                                                                                                                                                                                                                                                                                                                                                                                                                                                                                                                                                                                        | -                                                                                                                                                                                                                                                                                                                                                                                                                                                                                                                                                    | -                             | C_unihit_00148_mRNA_3,1   | -                           |
| GF003522 | 0                             | 1                         | 0                           | Hypothetical protein (1)                                                | -                                                                                                                                                                                                                                                                                                                                                                                                                                                                                                                                                                                                                                                                        | -                                                                                                                                                                                                                                                                                                                                                                                                                                                                                                                                                    | -                             | C_unihit_00148_mRNA_3,1   | -                           |
| GF003521 | 0                             | 1                         | 0                           | Aldehyde dehydrogenase family 2 member C4 (1)                           | oxidation-reduction process [GO:005514 biological_process] (1); oxidoreductase activity [GO:0001649 molecular_function] (1); oxidoreductase activity, acting on the aldehyde or oxo group of donors, NAD+ or NADP+ as acceptor [GO:0016620 molecular_function] (1); metabolic process [GO:0008132 biological_process] (1)                                                                                                                                                                                                                                                                                                                                                | Aldehyde dehydrogenase N-terminal domain [IPR01662] (1); Aldehyde dehydrogenase domain [IPR015590] (1); Aldehyde dehydrogenase, C-terminal [IPR016163] (1); Aldehyde-histidyl dehydrogenase [IPR016161] (1); Aldehyde dehydrogenase, glutamic acid active site [IPR029510] (1)                                                                                                                                                                                                                                                                       | -                             | C_unihit_00148_mRNA_28,1  | -                           |
| GF003520 | 0                             | 1                         | 0                           | Hypothetical protein (1)                                                | calmodulin binding [GO:0005516 molecular_function] (1); integral component of membrane [GO:0016021 cellular_component] (1); metal ion binding [GO:0008072 molecular_function] (1); calcium ion transmembrane transport [GO:0070888 biological_process] (1); membrane [GO:0005888 cellular_component] (1); calcium-transporting ATPase activity [GO:0005338 molecular_function] (1); nucleoside binding [GO:0000166 molecular_function] (1); ATP binding [GO:000524 molecular_function] (1)                                                                                                                                                                               | HAD-like domain [IPR023214] (1); Cation-transporting P-type ATPase, N-terminal [IPR004014] (1); Calcium-transporting P-type ATPase, N-terminal autoinhibitory domain [IPR024750] (1); P-type ATPase, A domain [IPR008250] (1); P-type ATPase, phosphorylation site [IPR018303] (1); P-type ATPase, cytoplasmic domain N [IPR023299] (1); P-type ATPase, subfamily IIB [IPR006408] (1); P-type ATPase [IPR001757] (1)                                                                                                                                 | -                             | C_unihit_00148_mRNA_16,1  | -                           |
| GF003518 | 0                             | 1                         | 0                           | Hypothetical protein (1)                                                | -                                                                                                                                                                                                                                                                                                                                                                                                                                                                                                                                                                                                                                                                        | -                                                                                                                                                                                                                                                                                                                                                                                                                                                                                                                                                    | -                             | C_unihit_00148_mRNA_13,1  | -                           |
| GF003517 | 0                             | 1                         | 0                           | Hypothetical protein (1)                                                | -                                                                                                                                                                                                                                                                                                                                                                                                                                                                                                                                                                                                                                                                        | -                                                                                                                                                                                                                                                                                                                                                                                                                                                                                                                                                    | -                             | C_unihit_00148_mRNA_1,1   | -                           |
| GF003516 | 0                             | 1                         | 0                           | Hypothetical protein (1)                                                | regulation of gene expression [GO:0010468 biological_process] (1); proteasome [GO:0005777 cellular_component] (1)                                                                                                                                                                                                                                                                                                                                                                                                                                                                                                                                                        | OST-HTH associated domain [IPR025677] (1); OST-HTH/LOTUS domain [IPR025665] (1); Meiosis arrest female protein 1 [IPR024700] (1)                                                                                                                                                                                                                                                                                                                                                                                                                     | -                             | C_unihit_00147_mRNA_35,1  | -                           |
| GF003515 | 0                             | 1                         | 0                           | Hypothetical protein (1)                                                | nucleic acid binding [GO:0003676 molecular_function] (1)                                                                                                                                                                                                                                                                                                                                                                                                                                                                                                                                                                                                                 | DNA-RNA-binding protein Alba-like [IPR027275] (1)                                                                                                                                                                                                                                                                                                                                                                                                                                                                                                    | -                             | C_unihit_00147_mRNA_32,1  | -                           |
| GF003514 | 0                             | 1                         | 0                           | Hypothetical protein (1)                                                | nucleic acid binding [GO:0003676 molecular_function] (1)                                                                                                                                                                                                                                                                                                                                                                                                                                                                                                                                                                                                                 | Ribonuclease H-like domain [IPR012337] (1); Domain of unknown function DUF4283 [IPR025588] (1)                                                                                                                                                                                                                                                                                                                                                                                                                                                       | -                             | C_unihit_00147_mRNA_30,1  | -                           |
| GF003513 | 0                             | 1                         | 0                           | Polynucleotide transferase, ribonuclease H-like superfamily protein (1) | transcription factor activity, sequence-specific; DNA binding [GO:0003700 molecular_function] (1); one-carbon metabolic process [GO:0006730 biological_process] (1); sequence-specific DNA binding [GO:0004565 molecular_function] (1); regulation of transcription, DNA-templated [GO:0006355 biological_process] (1); zinc ion binding [GO:0008270 molecular_function] (1); adenosylhomocysteinase activity [GO:0004013 molecular_function] (1)                                                                                                                                                                                                                        | Reverse transcriptase zinc-binding domain [IPR029660] (1); Zinc finger, GATA-type [IPR006079] (1); S-adenosyl-L-homocysteinase-hydrolase, NAD-binding domain [IPR015878] (1); NAD(P)-binding domain [IPR016040] (1); Adenosylhomocysteinase [IPR000042] (1)                                                                                                                                                                                                                                                                                          | -                             | C_unihit_00147_mRNA_28,1  | -                           |
| GF003511 | 0                             | 1                         | 0                           | Hypothetical protein (1)                                                | -                                                                                                                                                                                                                                                                                                                                                                                                                                                                                                                                                                                                                                                                        | -                                                                                                                                                                                                                                                                                                                                                                                                                                                                                                                                                    | -                             | C_unihit_00147_mRNA_25,1  | -                           |
| GF003510 | 0                             | 1                         | 0                           | Hypothetical protein (1)                                                | -                                                                                                                                                                                                                                                                                                                                                                                                                                                                                                                                                                                                                                                                        | -                                                                                                                                                                                                                                                                                                                                                                                                                                                                                                                                                    | -                             | C_unihit_00147_mRNA_21,1  | -                           |
| GF003509 | 0                             | 1                         | 0                           | Hypothetical protein (1)                                                | regulation of transcription, DNA-templated [GO:0006355 biological_process] (1)                                                                                                                                                                                                                                                                                                                                                                                                                                                                                                                                                                                           | FHY3/FAR1 family [IPR01052] (1)                                                                                                                                                                                                                                                                                                                                                                                                                                                                                                                      | -                             | C_unihit_00147_mRNA_20,1  | -                           |
| GF003508 | 0                             | 1                         | 0                           | Hypothetical protein (1)                                                | regulation of transcription, DNA-templated [GO:0006355 biological_process] (1)                                                                                                                                                                                                                                                                                                                                                                                                                                                                                                                                                                                           | FHY3/FAR1 family [IPR01052] (1)                                                                                                                                                                                                                                                                                                                                                                                                                                                                                                                      | -                             | C_unihit_00147_mRNA_19,1  | -                           |
| GF003507 | 0                             | 1                         | 0                           | F-box, LRR-repeat protein A4g14103 (1)                                  | protein binding [GO:0005515 molecular_function] (1)                                                                                                                                                                                                                                                                                                                                                                                                                                                                                                                                                                                                                      | FBD domain [IPR006566] (1); F-box domain [IPR001810] (1); Leucine-rich repeat domain, L domain-like [IPR02675] (1)                                                                                                                                                                                                                                                                                                                                                                                                                                   | -                             | C_unihit_00147_mRNA_18,1  | -                           |
| GF003506 | 0                             | 1                         | 0                           | Hypothetical protein (1)                                                | -                                                                                                                                                                                                                                                                                                                                                                                                                                                                                                                                                                                                                                                                        | -                                                                                                                                                                                                                                                                                                                                                                                                                                                                                                                                                    | -                             | C_unihit_00147_mRNA_15,1  | -                           |
| GF003505 | 0                             | 1                         | 0                           | Hypothetical protein (1)                                                | -                                                                                                                                                                                                                                                                                                                                                                                                                                                                                                                                                                                                                                                                        | -                                                                                                                                                                                                                                                                                                                                                                                                                                                                                                                                                    | -                             | C_unihit_00147_mRNA_11,1  | -                           |
| GF003504 | 0                             | 1                         | 0                           | Hypothetical protein (1)                                                | calcium ion binding [GO:0005509 molecular_function] (1)                                                                                                                                                                                                                                                                                                                                                                                                                                                                                                                                                                                                                  | EF-Hand 1, calcium-binding site [IPR01247] (1); EF-hand domain [IPR02048] (1); EF-hand domain pair [IPR011992] (1)                                                                                                                                                                                                                                                                                                                                                                                                                                   | -                             | C_unihit_00147_mRNA_1,1   | -                           |

| ID        | Num. in <i>C. crotolariae</i> | Num. in <i>C. canalis</i> | Num. in <i>P. trifidatus</i> | Name                                                    | GO                                                                                                                                                                                                                                                                                                  | InterPro                                                                                                                                                                            | Members in <i>C. crotolariae</i> | Members in <i>C. canalis</i> | Members in <i>P. trifidatus</i> |
|-----------|-------------------------------|---------------------------|------------------------------|---------------------------------------------------------|-----------------------------------------------------------------------------------------------------------------------------------------------------------------------------------------------------------------------------------------------------------------------------------------------------|-------------------------------------------------------------------------------------------------------------------------------------------------------------------------------------|----------------------------------|------------------------------|---------------------------------|
| GF0035203 | 0                             | 1                         | 0                            | Hypothetical protein (1)                                | oxidoreductase activity, acting on C1H-OH group of donors [GO:0016644 molecular_function] (1); flavin adenine dinucleotide binding [GO:005660 molecular_function] (1); oxidoreductase activity [GO:0016491 molecular_function] (1); oxidation-reduction process [GO:0055114 biological_process] (1) | FAD/NAD(P)-binding domain [IPR023753] (1); Glucose-methanol-choline oxidoreductase, C-terminal [IPR007673] (1); Glucose-methanol-choline oxidoreductase, N-terminal [IPR001172] (4) | -                                | C_umbii_00146_mRNA_39.1      | -                               |
| GF0035202 | 0                             | 1                         | 0                            | Long-chain-alkohol oxidase FAO2 (1)                     | oxidoreductase activity, acting on C1H-OH group of donors [GO:0016644 molecular_function] (1); flavin adenine dinucleotide binding [GO:005660 molecular_function] (1); oxidoreductase activity [GO:0016491 molecular_function] (1); oxidation-reduction process [GO:0055114 biological_process] (1) | FAD/NAD(P)-binding domain [IPR023753] (1); Glucose-methanol-choline oxidoreductase, C-terminal [IPR007673] (1); Glucose-methanol-choline oxidoreductase, N-terminal [IPR001172] (4) | -                                | C_umbii_00146_mRNA_33.1      | -                               |
| GF0035201 | 0                             | 1                         | 0                            | Hypothetical protein (1)                                | -                                                                                                                                                                                                                                                                                                   | -                                                                                                                                                                                   | -                                | C_umbii_00146_mRNA_31.1      | -                               |
| GF0035200 | 0                             | 1                         | 0                            | Hypothetical protein (1)                                | -                                                                                                                                                                                                                                                                                                   | -                                                                                                                                                                                   | -                                | C_umbii_00146_mRNA_27.1      | -                               |
| GF0035199 | 0                             | 1                         | 0                            | Plastid developmental protein DAG (1)                   | -                                                                                                                                                                                                                                                                                                   | -                                                                                                                                                                                   | -                                | C_umbii_00146_mRNA_20.1      | -                               |
| GF0035198 | 0                             | 1                         | 0                            | Hypothetical protein (1)                                | -                                                                                                                                                                                                                                                                                                   | -                                                                                                                                                                                   | -                                | C_umbii_00146_mRNA_2.1       | -                               |
| GF0035197 | 0                             | 1                         | 0                            | Hypothetical protein (1)                                | -                                                                                                                                                                                                                                                                                                   | Transposase, Top1/Ea-Spm-like [IPR004261] (1); Probable transposase, Pta/Ea-Spm, plant [IPR004252] (1)                                                                              | -                                | C_umbii_00146_mRNA_16.1      | -                               |
| GF0035196 | 0                             | 1                         | 0                            | Hypothetical protein (1)                                | ATPase activity [GO:0016887 molecular_function] (1); nucleic acid binding [GO:0003676 molecular_function] (1); ATP binding [GO:0005234 molecular_function] (1)                                                                                                                                      | P-loop containing nucleoside triphosphate hydrolase [IPR027413] (1); ABC transporter-like [IPR003439] (1); Ribonuclease H-like domain [IPR012337] (1)                               | -                                | C_umbii_00146_mRNA_12.1      | -                               |
| GF0035195 | 0                             | 1                         | 0                            | Hypothetical protein (1)                                | -                                                                                                                                                                                                                                                                                                   | -                                                                                                                                                                                   | -                                | C_umbii_00146_mRNA_10.1      | -                               |
| GF0035194 | 0                             | 1                         | 0                            | Hypothetical protein (1)                                | -                                                                                                                                                                                                                                                                                                   | -                                                                                                                                                                                   | -                                | C_umbii_00145_mRNA_9.1       | -                               |
| GF0035193 | 0                             | 1                         | 0                            | Hypothetical protein (1)                                | -                                                                                                                                                                                                                                                                                                   | -                                                                                                                                                                                   | -                                | C_umbii_00145_mRNA_74.1      | -                               |
| GF0035192 | 0                             | 1                         | 0                            | Hypothetical protein (1)                                | -                                                                                                                                                                                                                                                                                                   | -                                                                                                                                                                                   | -                                | C_umbii_00145_mRNA_70.1      | -                               |
| GF0035191 | 0                             | 1                         | 0                            | Hypothetical protein (1)                                | -                                                                                                                                                                                                                                                                                                   | -                                                                                                                                                                                   | -                                | C_umbii_00145_mRNA_7.1       | -                               |
| GF0035190 | 0                             | 1                         | 0                            | Hypothetical protein (1)                                | -                                                                                                                                                                                                                                                                                                   | -                                                                                                                                                                                   | -                                | C_umbii_00145_mRNA_60.1      | -                               |
| GF0035189 | 0                             | 1                         | 0                            | Hypothetical protein (1)                                | -                                                                                                                                                                                                                                                                                                   | Viral movement protein [IPR028919] (1)                                                                                                                                              | -                                | C_umbii_00145_mRNA_54.1      | -                               |
| GF0035188 | 0                             | 1                         | 0                            | Hypothetical protein (1)                                | -                                                                                                                                                                                                                                                                                                   | Reverse transcriptase domain [IPR006477] (1)                                                                                                                                        | -                                | C_umbii_00145_mRNA_5.1       | -                               |
| GF0035187 | 0                             | 1                         | 0                            | Hypothetical protein (1)                                | -                                                                                                                                                                                                                                                                                                   | -                                                                                                                                                                                   | -                                | C_umbii_00145_mRNA_49.1      | -                               |
| GF0035186 | 0                             | 1                         | 0                            | Hypothetical protein (1)                                | -                                                                                                                                                                                                                                                                                                   | -                                                                                                                                                                                   | -                                | C_umbii_00145_mRNA_48.1      | -                               |
| GF0035185 | 0                             | 1                         | 0                            | Hypothetical protein (1)                                | -                                                                                                                                                                                                                                                                                                   | Viral movement protein [IPR028919] (1)                                                                                                                                              | -                                | C_umbii_00145_mRNA_46.1      | -                               |
| GF0035184 | 0                             | 1                         | 0                            | Hypothetical protein (1)                                | -                                                                                                                                                                                                                                                                                                   | -                                                                                                                                                                                   | -                                | C_umbii_00145_mRNA_38.1      | -                               |
| GF0035183 | 0                             | 1                         | 0                            | Hypothetical protein (1)                                | nucleic acid binding [GO:0003676 molecular_function] (1); zinc ion binding [GO:0008270 molecular_function] (1)                                                                                                                                                                                      | Reverse transcriptase domain [IPR006477] (1); Zinc finger, CCHC-type [IPR001878] (1)                                                                                                | -                                | C_umbii_00145_mRNA_37.1      | -                               |
| GF0035182 | 0                             | 1                         | 0                            | Hypothetical protein (1)                                | -                                                                                                                                                                                                                                                                                                   | -                                                                                                                                                                                   | -                                | C_umbii_00145_mRNA_30.1      | -                               |
| GF0035181 | 0                             | 1                         | 0                            | Hypothetical protein (1)                                | -                                                                                                                                                                                                                                                                                                   | -                                                                                                                                                                                   | -                                | C_umbii_00145_mRNA_23.1      | -                               |
| GF0035180 | 0                             | 1                         | 0                            | Hypothetical protein (1)                                | -                                                                                                                                                                                                                                                                                                   | -                                                                                                                                                                                   | -                                | C_umbii_00145_mRNA_22.1      | -                               |
| GF0035179 | 0                             | 1                         | 0                            | Hypothetical protein (1)                                | -                                                                                                                                                                                                                                                                                                   | -                                                                                                                                                                                   | -                                | C_umbii_00145_mRNA_21.1      | -                               |
| GF0035178 | 0                             | 1                         | 0                            | Hypothetical protein (1)                                | nucleic acid binding [GO:0003676 molecular_function] (1); zinc ion binding [GO:0008270 molecular_function] (1)                                                                                                                                                                                      | Zinc finger, CCHC-type [IPR001878] (1)                                                                                                                                              | -                                | C_umbii_00145_mRNA_20.1      | -                               |
| GF0035177 | 0                             | 1                         | 0                            | Hypothetical protein (1)                                | -                                                                                                                                                                                                                                                                                                   | -                                                                                                                                                                                   | -                                | C_umbii_00145_mRNA_2.1       | -                               |
| GF0035176 | 0                             | 1                         | 0                            | Hypothetical protein (1)                                | -                                                                                                                                                                                                                                                                                                   | -                                                                                                                                                                                   | -                                | C_umbii_00145_mRNA_19.1      | -                               |
| GF0035175 | 0                             | 1                         | 0                            | Hypothetical protein (1)                                | -                                                                                                                                                                                                                                                                                                   | -                                                                                                                                                                                   | -                                | C_umbii_00145_mRNA_16.1      | -                               |
| GF0035174 | 0                             | 1                         | 0                            | Hypothetical protein (1)                                | -                                                                                                                                                                                                                                                                                                   | -                                                                                                                                                                                   | -                                | C_umbii_00145_mRNA_1.1       | -                               |
| GF0035173 | 0                             | 1                         | 0                            | Hypothetical protein (1)                                | -                                                                                                                                                                                                                                                                                                   | -                                                                                                                                                                                   | -                                | C_umbii_00144_mRNA_9.1       | -                               |
| GF0035172 | 0                             | 1                         | 0                            | Hypothetical protein (1)                                | -                                                                                                                                                                                                                                                                                                   | -                                                                                                                                                                                   | -                                | C_umbii_00144_mRNA_8.1       | -                               |
| GF0035171 | 0                             | 1                         | 0                            | Hypothetical protein (1)                                | -                                                                                                                                                                                                                                                                                                   | -                                                                                                                                                                                   | -                                | C_umbii_00144_mRNA_6.1       | -                               |
| GF0035170 | 0                             | 1                         | 0                            | Long chain acyl-CoA synthetase 8 (1)                    | metabolic process [GO:0008152 biological_process] (1); catalytic activity [GO:0003676 molecular_function] (1)                                                                                                                                                                                       | AMP-dependent synthetase/ligase [IPR006873] (1)                                                                                                                                     | -                                | C_umbii_00144_mRNA_5.1       | -                               |
| GF0035169 | 0                             | 1                         | 0                            | Hypothetical protein (1)                                | protein binding [GO:0005515 molecular_function] (1)                                                                                                                                                                                                                                                 | Leucine-rich repeat [IPR001611] (1); Leucine-rich repeat domain, I. domain-like [IPR012675] (1)                                                                                     | -                                | C_umbii_00144_mRNA_47.1      | -                               |
| GF0035168 | 0                             | 1                         | 0                            | Hypothetical protein (1)                                | -                                                                                                                                                                                                                                                                                                   | -                                                                                                                                                                                   | -                                | C_umbii_00144_mRNA_42.1      | -                               |
| GF0035167 | 0                             | 1                         | 0                            | Hypothetical protein (1)                                | -                                                                                                                                                                                                                                                                                                   | -                                                                                                                                                                                   | -                                | C_umbii_00144_mRNA_38.1      | -                               |
| GF0035166 | 0                             | 1                         | 0                            | Hypothetical protein (1)                                | -                                                                                                                                                                                                                                                                                                   | -                                                                                                                                                                                   | -                                | C_umbii_00144_mRNA_37.1      | -                               |
| GF0035165 | 0                             | 1                         | 0                            | Hypothetical protein (1)                                | -                                                                                                                                                                                                                                                                                                   | -                                                                                                                                                                                   | -                                | C_umbii_00144_mRNA_36.1      | -                               |
| GF0035164 | 0                             | 1                         | 0                            | Trihydroxysynthase synthase (1)                         | catalytic activity [GO:0003676 molecular_function] (1); metabolic process [GO:0008152 biological_process] (1)                                                                                                                                                                                       | Chalcone/silbene synthase, N-terminal [IPR010991] (1); Thiolase-like [IPR016039] (1); Chalcone/silbene synthase, C-terminal [IPR012328] (1)                                         | -                                | C_umbii_00144_mRNA_33.1      | -                               |
| GF0035163 | 0                             | 1                         | 0                            | Hypothetical protein (1)                                | transmembrane transporter activity [GO:0022857 molecular_function] (1); integral component of membrane [GO:0016021 cellular_component] (1) cell cycle [GO:0007049 biological_process] (1); nucleus [GO:0005634 cellular_component] (1); DNA repair [GO:0006281 biological_process] (1)              | WAT1-related protein [IPR030184] (1)                                                                                                                                                | -                                | C_umbii_00144_mRNA_21.1      | -                               |
| GF0035162 | 0                             | 1                         | 0                            | Hypothetical protein (1)                                | -                                                                                                                                                                                                                                                                                                   | Checkpoint protein Rad17/Rad24 [IPR04582] (1)                                                                                                                                       | -                                | C_umbii_00144_mRNA_15.1      | -                               |
| GF0035161 | 0                             | 1                         | 0                            | Hypothetical protein (1)                                | -                                                                                                                                                                                                                                                                                                   | -                                                                                                                                                                                   | -                                | C_umbii_00143_mRNA_7.1       | -                               |
| GF0035160 | 0                             | 1                         | 0                            | Hypothetical protein (1)                                | protein binding [GO:0005515 molecular_function] (1)                                                                                                                                                                                                                                                 | Leucine-rich repeat [IPR001611] (1); Leucine-rich repeat domain, I. domain-like [IPR012675] (1)                                                                                     | -                                | C_umbii_00143_mRNA_52.1      | -                               |
| GF0035159 | 0                             | 1                         | 0                            | Putative retroelement pol polyprotein (1)               | -                                                                                                                                                                                                                                                                                                   | -                                                                                                                                                                                   | -                                | C_umbii_00143_mRNA_51.1      | -                               |
| GF0035158 | 0                             | 1                         | 0                            | Hypothetical protein (1)                                | -                                                                                                                                                                                                                                                                                                   | -                                                                                                                                                                                   | -                                | C_umbii_00143_mRNA_48.1      | -                               |
| GF0035157 | 0                             | 1                         | 0                            | Hypothetical protein (1)                                | -                                                                                                                                                                                                                                                                                                   | Leucine-rich repeat domain, I. domain-like [IPR012675] (1)                                                                                                                          | -                                | C_umbii_00143_mRNA_46.1      | -                               |
| GF0035156 | 0                             | 1                         | 0                            | Hypothetical protein (1)                                | -                                                                                                                                                                                                                                                                                                   | -                                                                                                                                                                                   | -                                | C_umbii_00143_mRNA_33.1      | -                               |
| GF0035155 | 0                             | 1                         | 0                            | Hypothetical protein (1)                                | -                                                                                                                                                                                                                                                                                                   | -                                                                                                                                                                                   | -                                | C_umbii_00143_mRNA_3.1       | -                               |
| GF0035154 | 0                             | 1                         | 0                            | LSDI-type zinc finger protein (1)                       | -                                                                                                                                                                                                                                                                                                   | Zinc finger, LSDI-type [IPR005735] (1)                                                                                                                                              | -                                | C_umbii_00143_mRNA_29.1      | -                               |
| GF0035153 | 0                             | 1                         | 0                            | Hypothetical protein (1)                                | -                                                                                                                                                                                                                                                                                                   | Pentapeptide repeat [IPR002885] (1)                                                                                                                                                 | -                                | C_umbii_00143_mRNA_16.1      | -                               |
| GF0035152 | 0                             | 1                         | 0                            | Transposon protein, putative, unclassified (1)          | zinc ion binding [GO:0008270 molecular_function] (1); regulation of transcription, DNA-templated [GO:0006355 biological_process] (1)                                                                                                                                                                | FHY3/FAR1 family [IPR01052] (1); Zinc finger, SWIM-type [IPR005271] (1); MULE transposase domain [IPR018289] (1); Zinc finger, PAM2-type [IPR006564] (1)                            | -                                | C_umbii_00142_mRNA_41.1      | -                               |
| GF0035151 | 0                             | 1                         | 0                            | MADS-box protein STMADS11 subfamily (1)                 | DNA binding [GO:0003677 molecular_function] (1); protein dimerization activity [GO:0046983 molecular_function] (1)                                                                                                                                                                                  | Transcription factor, MADS-box [IPR002100] (1)                                                                                                                                      | -                                | C_umbii_00142_mRNA_30.1      | -                               |
| GF0035150 | 0                             | 1                         | 0                            | Rab GDP dissociation inhibitor alpha (1)                | oxidoreductase activity [GO:0016491 molecular_function] (1); oxidation-reduction process [GO:0055114 biological_process] (1)                                                                                                                                                                        | GDP dissociation inhibitor [IPR018203] (1); FAD/NAD(P)-binding domain [IPR023753] (1)                                                                                               | -                                | C_umbii_00142_mRNA_28.1      | -                               |
| GF0035149 | 0                             | 1                         | 0                            | Hypothetical protein (1)                                | -                                                                                                                                                                                                                                                                                                   | -                                                                                                                                                                                   | -                                | C_umbii_00142_mRNA_25.1      | -                               |
| GF0035148 | 0                             | 1                         | 0                            | Hypothetical protein (1)                                | regulation of transcription, DNA-templated [GO:0006355 biological_process] (1)                                                                                                                                                                                                                      | FHY3/FAR1 family [IPR01052] (1)                                                                                                                                                     | -                                | C_umbii_00142_mRNA_23.1      | -                               |
| GF0035147 | 0                             | 1                         | 0                            | Hypothetical protein (1)                                | -                                                                                                                                                                                                                                                                                                   | Rab-GTPase-TBC domain [IPR000195] (1)                                                                                                                                               | -                                | C_umbii_00142_mRNA_20.1      | -                               |
| GF0035146 | 0                             | 1                         | 0                            | Hypothetical protein (1)                                | ADP binding [GO:0045351 molecular_function] (1)                                                                                                                                                                                                                                                     | NB-ABC [IPR02182] (1); P-loop containing nucleoside triphosphate hydrolase [IPR027417] (1)                                                                                          | -                                | C_umbii_00142_mRNA_10.1      | -                               |
| GF0035145 | 0                             | 1                         | 0                            | Hypothetical protein (1)                                | -                                                                                                                                                                                                                                                                                                   | Domain of unknown function DUF477 [IPR027951] (1)                                                                                                                                   | -                                | C_umbii_00142_mRNA_1.1       | -                               |
| GF0035144 | 0                             | 1                         | 0                            | UDP-glycosyltransferase 74E2 (1)                        | metabolic process [GO:0008152 biological_process] (1); transferase activity, transferring hexosyl groups [GO:0016758 molecular_function] (1)                                                                                                                                                        | UDP-glucuronosyl/UDP-glycosyltransferase [IPR002213] (1)                                                                                                                            | -                                | C_umbii_00141_mRNA_7.1       | -                               |
| GF0035143 | 0                             | 1                         | 0                            | Hypothetical protein (1)                                | -                                                                                                                                                                                                                                                                                                   | -                                                                                                                                                                                   | -                                | C_umbii_00141_mRNA_64.1      | -                               |
| GF0035142 | 0                             | 1                         | 0                            | Hypothetical protein (1)                                | -                                                                                                                                                                                                                                                                                                   | -                                                                                                                                                                                   | -                                | C_umbii_00141_mRNA_63.1      | -                               |
| GF0035141 | 0                             | 1                         | 0                            | Hypothetical protein (1)                                | -                                                                                                                                                                                                                                                                                                   | -                                                                                                                                                                                   | -                                | C_umbii_00141_mRNA_46.1      | -                               |
| GF0035140 | 0                             | 1                         | 0                            | Hypothetical protein (1)                                | -                                                                                                                                                                                                                                                                                                   | Solute-binding protein family 3N-terminal domain of MIF [IPR001638] (1)                                                                                                             | -                                | C_umbii_00141_mRNA_30.1      | -                               |
| GF0035139 | 0                             | 1                         | 0                            | UDP-glycosyltransferase 74E2 (1)                        | transferase activity, transferring hexosyl groups [GO:0016758 molecular_function] (1); metabolic process [GO:0008152 biological_process] (1)                                                                                                                                                        | UDP-glucuronosyl/UDP-glycosyltransferase [IPR002213] (1)                                                                                                                            | -                                | C_umbii_00141_mRNA_2.1       | -                               |
| GF0035138 | 0                             | 1                         | 0                            | Putative non-LTR retroelement reverse transcriptase (1) | RNA-DNA hybrid ribonuclease activity [GO:0040522 molecular_function] (1); nucleic acid binding [GO:0003676 molecular_function] (1)                                                                                                                                                                  | Ribonuclease H domain [IPR002156] (1); Reverse transcriptase zinc-binding domain [IPR026960] (1); Ribonuclease H-like domain [IPR012337] (1)                                        | -                                | C_umbii_00141_mRNA_11.1      | -                               |
| GF0035137 | 0                             | 1                         | 0                            | Hypothetical protein (1)                                | proteolysis [GO:0006508 biological_process] (1); aspartic-type endopeptidase activity [GO:0004190 molecular_function] (1)                                                                                                                                                                           | Aspartic peptidase, active site [IPR01969] (1)                                                                                                                                      | -                                | C_umbii_00141_mRNA_1.1       | -                               |
| GF0035136 | 0                             | 1                         | 0                            | Hypothetical protein (1)                                | -                                                                                                                                                                                                                                                                                                   | -                                                                                                                                                                                   | -                                | C_umbii_00140_mRNA_39.1      | -                               |
| GF0035135 | 0                             | 1                         | 0                            | Hypothetical protein (1)                                | -                                                                                                                                                                                                                                                                                                   | -                                                                                                                                                                                   | -                                | C_umbii_00140_mRNA_38.1      | -                               |
| GF0035134 | 0                             | 1                         | 0                            | Hypothetical protein (1)                                | -                                                                                                                                                                                                                                                                                                   | -                                                                                                                                                                                   | -                                | C_umbii_00140_mRNA_36.1      | -                               |
| GF0035133 | 0                             | 1                         | 0                            | Hypothetical protein (1)                                | -                                                                                                                                                                                                                                                                                                   | -                                                                                                                                                                                   | -                                | C_umbii_00140_mRNA_2.1       | -                               |
| GF0035132 | 0                             | 1                         | 0                            | Hypothetical protein (1)                                | -                                                                                                                                                                                                                                                                                                   | -                                                                                                                                                                                   | -                                | C_umbii_00140_mRNA_11.1      | -                               |
| GF0035131 | 0                             | 1                         | 0                            | Hypothetical protein (1)                                | -                                                                                                                                                                                                                                                                                                   | Protein of unknown function DUF597 [IPR006734] (1)                                                                                                                                  | -                                | C_umbii_00140_mRNA_1.1       | -                               |
| GF0035130 | 0                             | 1                         | 0                            | Hypothetical protein (1)                                | -                                                                                                                                                                                                                                                                                                   | -                                                                                                                                                                                   | -                                | C_umbii_00139_mRNA_52.1      | -                               |
| GF0035129 | 0                             | 1                         | 0                            | Hypothetical protein (1)                                | -                                                                                                                                                                                                                                                                                                   | Domain of unknown function DUF4283 [IPR025558] (1)                                                                                                                                  | -                                | C_umbii_00139_mRNA_40.1      | -                               |
| GF0035128 | 0                             | 1                         | 0                            | Hypothetical protein (1)                                | -                                                                                                                                                                                                                                                                                                   | Viral movement protein [IPR028919] (1)                                                                                                                                              | -                                | C_umbii_00138_mRNA_7.1       | -                               |
| GF0035127 | 0                             | 1                         | 0                            | Hypothetical protein (1)                                | -                                                                                                                                                                                                                                                                                                   | Viral movement protein [IPR028919] (1)                                                                                                                                              | -                                | C_umbii_00138_mRNA_68.1      | -                               |
| GF0035126 | 0                             | 1                         | 0                            | Hypothetical protein (1)                                | nucleic acid binding [GO:0003676 molecular_function] (1); zinc ion binding [GO:0008270 molecular_function] (1)                                                                                                                                                                                      | Zinc finger, CCHC-type [IPR001878] (1); Viral movement protein [IPR028919] (1)                                                                                                      | -                                | C_umbii_00138_mRNA_66.1      | -                               |
| GF0035125 | 0                             | 1                         | 0                            | Hypothetical protein (1)                                | zinc ion binding [GO:0008270 molecular_function] (1); nucleic acid binding [GO:0003676 molecular_function] (1)                                                                                                                                                                                      | Zinc finger, CCHC-type [IPR001878] (1)                                                                                                                                              | -                                | C_umbii_00138_mRNA_64.1      | -                               |
| GF0035124 | 0                             | 1                         | 0                            | Hypothetical protein (1)                                | zinc ion binding [GO:0008270 molecular_function] (1); nucleic acid binding [GO:0003676 molecular_function] (1)                                                                                                                                                                                      | Zinc finger, CCHC-type [IPR001878] (1)                                                                                                                                              | -                                | C_umbii_00138_mRNA_63.1      | -                               |
| GF0035123 | 0                             | 1                         | 0                            | Hypothetical protein (1)                                | -                                                                                                                                                                                                                                                                                                   | -                                                                                                                                                                                   | -                                | C_umbii_00138_mRNA_62.1      | -                               |
| GF0035122 | 0                             | 1                         | 0                            | Hypothetical protein (1)                                | -                                                                                                                                                                                                                                                                                                   | -                                                                                                                                                                                   | -                                | C_umbii_00138_mRNA_61.1      | -                               |
| GF0035121 | 0                             | 1                         | 0                            | Hypothetical protein (1)                                | -                                                                                                                                                                                                                                                                                                   | -                                                                                                                                                                                   | -                                | C_umbii_00138_mRNA_60.1      | -                               |
| GF0035120 | 0                             | 1                         | 0                            | Hypothetical protein (1)                                | -                                                                                                                                                                                                                                                                                                   | -                                                                                                                                                                                   | -                                | C_umbii_00138_mRNA_6.1       | -                               |
| GF0035119 | 0                             | 1                         | 0                            | Hypothetical protein (1)                                | -                                                                                                                                                                                                                                                                                                   | -                                                                                                                                                                                   | -                                | C_umbii_00138_mRNA_59.1      | -                               |

| ID       | Num. in C. crottenstei | Num. in C. auris | Num. in P. putida | Note                                                | GO                                                                                                                                                                                                                                                                                                                                                                                         | InterPro                                                                                                                                                                                                                                                  | Members in C. crottenstei | Members in C. auris     | Members in P. putida |
|----------|------------------------|------------------|-------------------|-----------------------------------------------------|--------------------------------------------------------------------------------------------------------------------------------------------------------------------------------------------------------------------------------------------------------------------------------------------------------------------------------------------------------------------------------------------|-----------------------------------------------------------------------------------------------------------------------------------------------------------------------------------------------------------------------------------------------------------|---------------------------|-------------------------|----------------------|
| GF003518 | 0                      | 1                | 0                 | Hypothetical protein (1)                            | aspartic-type endopeptidase activity [GO:0004190 molecular_function] (1); proteolysis [GO:0006508 biological_process] (1)                                                                                                                                                                                                                                                                  | Peptidase ADA, retrovirus, catalytic [IPR019951] (1)                                                                                                                                                                                                      | -                         | C_unihh_00138_mRNA_58.1 | -                    |
| GF003517 | 0                      | 1                | 0                 | Hypothetical protein (1)                            | -                                                                                                                                                                                                                                                                                                                                                                                          | -                                                                                                                                                                                                                                                         | -                         | C_unihh_00138_mRNA_57.1 | -                    |
| GF003516 | 0                      | 1                | 0                 | Hypothetical protein (1)                            | -                                                                                                                                                                                                                                                                                                                                                                                          | -                                                                                                                                                                                                                                                         | -                         | C_unihh_00138_mRNA_55.1 | -                    |
| GF003515 | 0                      | 1                | 0                 | Hypothetical protein (1)                            | -                                                                                                                                                                                                                                                                                                                                                                                          | -                                                                                                                                                                                                                                                         | -                         | C_unihh_00138_mRNA_54.1 | -                    |
| GF003514 | 0                      | 1                | 0                 | Hypothetical protein (1)                            | proteolysis [GO:0006508 biological_process] (1); aspartic-type endopeptidase activity [GO:0004190 molecular_function] (1)                                                                                                                                                                                                                                                                  | Aspartic peptidase domain [IPR021499] (1); Peptidase ADA, retrovirus, catalytic [IPR019951] (1); Reverse transcriptase domain [IPR006477] (1); Retropepsins [IPR018611] (1)                                                                               | -                         | C_unihh_00138_mRNA_52.1 | -                    |
| GF003513 | 0                      | 1                | 0                 | Hypothetical protein (1)                            | -                                                                                                                                                                                                                                                                                                                                                                                          | Viral movement protein [IPR028919] (1)                                                                                                                                                                                                                    | -                         | C_unihh_00138_mRNA_50.1 | -                    |
| GF003512 | 0                      | 1                | 0                 | Hypothetical protein (1)                            | -                                                                                                                                                                                                                                                                                                                                                                                          | -                                                                                                                                                                                                                                                         | -                         | C_unihh_00138_mRNA_48.1 | -                    |
| GF003511 | 0                      | 1                | 0                 | Hypothetical protein (1)                            | -                                                                                                                                                                                                                                                                                                                                                                                          | -                                                                                                                                                                                                                                                         | -                         | C_unihh_00138_mRNA_47.1 | -                    |
| GF003510 | 0                      | 1                | 0                 | Hypothetical protein (1)                            | -                                                                                                                                                                                                                                                                                                                                                                                          | -                                                                                                                                                                                                                                                         | -                         | C_unihh_00138_mRNA_46.1 | -                    |
| GF003509 | 0                      | 1                | 0                 | Hypothetical protein (1)                            | -                                                                                                                                                                                                                                                                                                                                                                                          | -                                                                                                                                                                                                                                                         | -                         | C_unihh_00138_mRNA_45.1 | -                    |
| GF003508 | 0                      | 1                | 0                 | Hypothetical protein (1)                            | -                                                                                                                                                                                                                                                                                                                                                                                          | -                                                                                                                                                                                                                                                         | -                         | C_unihh_00138_mRNA_44.1 | -                    |
| GF003507 | 0                      | 1                | 0                 | Hypothetical protein (1)                            | nucleic acid binding [GO:0003676 molecular_function] (1); zinc ion binding [GO:0008270 molecular_function] (1)                                                                                                                                                                                                                                                                             | Reverse transcriptase domain [IPR006477] (1); Zinc finger, CCHC-type [IPR018781] (1)                                                                                                                                                                      | -                         | C_unihh_00138_mRNA_39.1 | -                    |
| GF003506 | 0                      | 1                | 0                 | Hypothetical protein (1)                            | -                                                                                                                                                                                                                                                                                                                                                                                          | -                                                                                                                                                                                                                                                         | -                         | C_unihh_00138_mRNA_36.1 | -                    |
| GF003505 | 0                      | 1                | 0                 | PHD finger protein (1)                              | zinc ion binding [GO:0008270 molecular_function] (1); protein binding [GO:0005515 molecular_function] (1)                                                                                                                                                                                                                                                                                  | Zinc finger, PHD-type [IPR019787] (1); Zinc finger, PHD-type [IPR019651] (1); Zinc finger, RING-FYVE-PHD-type [IPR013083] (1); Zinc finger, PHD-type, conserved site [IPR017961] (1); Zinc finger, FYVE-PHD-type [IPR010111] (1)                          | -                         | C_unihh_00138_mRNA_35.1 | -                    |
| GF003504 | 0                      | 1                | 0                 | Hypothetical protein (1)                            | -                                                                                                                                                                                                                                                                                                                                                                                          | -                                                                                                                                                                                                                                                         | -                         | C_unihh_00138_mRNA_32.1 | -                    |
| GF003503 | 0                      | 1                | 0                 | Hypothetical protein (1)                            | -                                                                                                                                                                                                                                                                                                                                                                                          | -                                                                                                                                                                                                                                                         | -                         | C_unihh_00138_mRNA_28.1 | -                    |
| GF003502 | 0                      | 1                | 0                 | Hypothetical protein (1)                            | -                                                                                                                                                                                                                                                                                                                                                                                          | -                                                                                                                                                                                                                                                         | -                         | C_unihh_00138_mRNA_23.1 | -                    |
| GF003501 | 0                      | 1                | 0                 | Hypothetical protein (1)                            | -                                                                                                                                                                                                                                                                                                                                                                                          | -                                                                                                                                                                                                                                                         | -                         | C_unihh_00138_mRNA_22.1 | -                    |
| GF003500 | 0                      | 1                | 0                 | Hypothetical protein (1)                            | -                                                                                                                                                                                                                                                                                                                                                                                          | -                                                                                                                                                                                                                                                         | -                         | C_unihh_00138_mRNA_21.1 | -                    |
| GF003499 | 0                      | 1                | 0                 | Hypothetical protein (1)                            | -                                                                                                                                                                                                                                                                                                                                                                                          | -                                                                                                                                                                                                                                                         | -                         | C_unihh_00138_mRNA_2.1  | -                    |
| GF003498 | 0                      | 1                | 0                 | Hypothetical protein (1)                            | -                                                                                                                                                                                                                                                                                                                                                                                          | -                                                                                                                                                                                                                                                         | -                         | C_unihh_00138_mRNA_15.1 | -                    |
| GF003497 | 0                      | 1                | 0                 | Hypothetical protein (1)                            | -                                                                                                                                                                                                                                                                                                                                                                                          | -                                                                                                                                                                                                                                                         | -                         | C_unihh_00138_mRNA_13.1 | -                    |
| GF003496 | 0                      | 1                | 0                 | Hypothetical protein (1)                            | -                                                                                                                                                                                                                                                                                                                                                                                          | Viral movement protein [IPR028919] (1)                                                                                                                                                                                                                    | -                         | C_unihh_00138_mRNA_12.1 | -                    |
| GF003495 | 0                      | 1                | 0                 | Hypothetical protein (1)                            | protein binding [GO:0005515 molecular_function] (1)                                                                                                                                                                                                                                                                                                                                        | F-box domain [IPR018101] (1)                                                                                                                                                                                                                              | -                         | C_unihh_00137_mRNA_9.1  | -                    |
| GF003494 | 0                      | 1                | 0                 | tRNA (Guanine(37)-N1)-methyltransferase 2 (1)       | -                                                                                                                                                                                                                                                                                                                                                                                          | S-adenosyl-L-methionine-dependent methyltransferase [IPR029631] (1); SAM-dependent methyltransferase [IPR018382] (1)                                                                                                                                      | -                         | C_unihh_00137_mRNA_8.1  | -                    |
| GF003493 | 0                      | 1                | 0                 | Hypothetical protein (1)                            | -                                                                                                                                                                                                                                                                                                                                                                                          | -                                                                                                                                                                                                                                                         | -                         | C_unihh_00137_mRNA_7.1  | -                    |
| GF003492 | 0                      | 1                | 0                 | Hypothetical protein (1)                            | nucleus [GO:0005634 cellular_component] (1)                                                                                                                                                                                                                                                                                                                                                | Cyclin-like [IPR013763] (1); Cyclin, C-terminal domain [IPR004367] (1)                                                                                                                                                                                    | -                         | C_unihh_00137_mRNA_6.1  | -                    |
| GF003491 | 0                      | 1                | 0                 | Hypothetical protein (1)                            | -                                                                                                                                                                                                                                                                                                                                                                                          | -                                                                                                                                                                                                                                                         | -                         | C_unihh_00137_mRNA_49.1 | -                    |
| GF003490 | 0                      | 1                | 0                 | Hypothetical protein (1)                            | -                                                                                                                                                                                                                                                                                                                                                                                          | -                                                                                                                                                                                                                                                         | -                         | C_unihh_00137_mRNA_47.1 | -                    |
| GF003489 | 0                      | 1                | 0                 | Hypothetical protein (1)                            | -                                                                                                                                                                                                                                                                                                                                                                                          | -                                                                                                                                                                                                                                                         | -                         | C_unihh_00137_mRNA_46.1 | -                    |
| GF003488 | 0                      | 1                | 0                 | Hypothetical protein (1)                            | -                                                                                                                                                                                                                                                                                                                                                                                          | -                                                                                                                                                                                                                                                         | -                         | C_unihh_00137_mRNA_31.1 | -                    |
| GF003487 | 0                      | 1                | 0                 | Hypothetical protein (1)                            | -                                                                                                                                                                                                                                                                                                                                                                                          | -                                                                                                                                                                                                                                                         | -                         | C_unihh_00137_mRNA_3.1  | -                    |
| GF003486 | 0                      | 1                | 0                 | Hypothetical protein (1)                            | -                                                                                                                                                                                                                                                                                                                                                                                          | Protein of unknown function wound-induced [IPR022251] (1)                                                                                                                                                                                                 | -                         | C_unihh_00137_mRNA_24.1 | -                    |
| GF003485 | 0                      | 1                | 0                 | Hypothetical protein (1)                            | -                                                                                                                                                                                                                                                                                                                                                                                          | -                                                                                                                                                                                                                                                         | -                         | C_unihh_00136_mRNA_57.1 | -                    |
| GF003484 | 0                      | 1                | 0                 | Transmembrane emp24 domain-containing protein A (1) | transport [GO:0006810 biological_process] (1); integral component of membrane [GO:0016021 cellular_component] (1)                                                                                                                                                                                                                                                                          | TM21-related [IPR015720] (1); GOLD domain [IPR009638] (1)                                                                                                                                                                                                 | -                         | C_unihh_00136_mRNA_15.1 | -                    |
| GF003483 | 0                      | 1                | 0                 | Hypothetical protein (1)                            | -                                                                                                                                                                                                                                                                                                                                                                                          | -                                                                                                                                                                                                                                                         | -                         | C_unihh_00135_mRNA_57.1 | -                    |
| GF003482 | 0                      | 1                | 0                 | Hypothetical protein (1)                            | -                                                                                                                                                                                                                                                                                                                                                                                          | -                                                                                                                                                                                                                                                         | -                         | C_unihh_00135_mRNA_56.1 | -                    |
| GF003481 | 0                      | 1                | 0                 | Hypothetical protein (1)                            | -                                                                                                                                                                                                                                                                                                                                                                                          | -                                                                                                                                                                                                                                                         | -                         | C_unihh_00135_mRNA_53.1 | -                    |
| GF003480 | 0                      | 1                | 0                 | Hypothetical protein (1)                            | -                                                                                                                                                                                                                                                                                                                                                                                          | -                                                                                                                                                                                                                                                         | -                         | C_unihh_00135_mRNA_52.1 | -                    |
| GF003479 | 0                      | 1                | 0                 | Hypothetical protein (1)                            | -                                                                                                                                                                                                                                                                                                                                                                                          | -                                                                                                                                                                                                                                                         | -                         | C_unihh_00135_mRNA_51.1 | -                    |
| GF003478 | 0                      | 1                | 0                 | Hypothetical protein (1)                            | -                                                                                                                                                                                                                                                                                                                                                                                          | -                                                                                                                                                                                                                                                         | -                         | C_unihh_00135_mRNA_43.1 | -                    |
| GF003477 | 0                      | 1                | 0                 | Hypothetical protein (1)                            | -                                                                                                                                                                                                                                                                                                                                                                                          | Ubiquitin-conjugating enzyme RWD-like [IPR014151] (1); Ubiquitin-conjugating enzyme E2 [IPR000608] (1)                                                                                                                                                    | -                         | C_unihh_00135_mRNA_41.1 | -                    |
| GF003476 | 0                      | 1                | 0                 | Hypothetical protein (1)                            | nucleic acid binding [GO:0003676 molecular_function] (1)                                                                                                                                                                                                                                                                                                                                   | Ribonuclease H-like domain [IPR012337] (1); Leucine-rich repeat domain, L domain-like [IPR032675] (1)                                                                                                                                                     | -                         | C_unihh_00135_mRNA_35.1 | -                    |
| GF003475 | 0                      | 1                | 0                 | Hypothetical protein (1)                            | -                                                                                                                                                                                                                                                                                                                                                                                          | -                                                                                                                                                                                                                                                         | -                         | C_unihh_00135_mRNA_2.1  | -                    |
| GF003474 | 0                      | 1                | 0                 | Hypothetical protein (1)                            | -                                                                                                                                                                                                                                                                                                                                                                                          | -                                                                                                                                                                                                                                                         | -                         | C_unihh_00135_mRNA_18.1 | -                    |
| GF003473 | 0                      | 1                | 0                 | Hypothetical protein (1)                            | metal ion binding [GO:0004872 molecular_function] (1)                                                                                                                                                                                                                                                                                                                                      | ZF-HD homeobox protein, Cys/His-rich dimerization domain [IPR006456] (1); Zinc finger, C2H2 [IPR007087] (1)                                                                                                                                               | -                         | C_unihh_00135_mRNA_10.1 | -                    |
| GF003472 | 0                      | 1                | 0                 | LRR receptor-like kinase family protein (1)         | protein binding [GO:0005515 molecular_function] (1)                                                                                                                                                                                                                                                                                                                                        | Leucine-rich repeat-containing N-terminal, plant-type [IPR013210] (1); Leucine-rich repeat [IPR016111] (1); Leucine-rich repeat, typical sub-type [IPR003591] (1); Leucine-rich repeat domain, L domain-like [IPR032675] (1)                              | -                         | C_unihh_00134_mRNA_53.1 | -                    |
| GF003471 | 0                      | 1                | 0                 | Acidic endochitinase (1)                            | carbohydrate metabolic process [GO:0005979 biological_process] (1); hydrolyase activity, hydrolyzing O-glycosyl compounds [GO:0004553 molecular_function] (1)                                                                                                                                                                                                                              | Glycoside hydrolase, chitinase active site [IPR015791] (1); Glycoside hydrolase superfamily domain [IPR017311] (1); Glycoside hydrolase family 18, catalytic domain [IPR001223] (1)                                                                       | -                         | C_unihh_00134_mRNA_47.1 | -                    |
| GF003470 | 0                      | 1                | 0                 | ABC transporter (1)                                 | transport [GO:0006810 biological_process] (1); integral component of membrane [GO:0016021 cellular_component] (1); ATP binding [GO:0005524 molecular_function] (1); transmembrane transport [GO:0050805 biological_process] (1); ATPase activity, coupled to transmembrane movement of substances [GO:0045266 molecular_function] (1)                                                      | ABC transporter type 1, transmembrane domain [IPR011527] (1)                                                                                                                                                                                              | -                         | C_unihh_00134_mRNA_40.1 | -                    |
| GF003469 | 0                      | 1                | 0                 | Hypothetical protein (1)                            | -                                                                                                                                                                                                                                                                                                                                                                                          | -                                                                                                                                                                                                                                                         | -                         | C_unihh_00134_mRNA_26.1 | -                    |
| GF003468 | 0                      | 1                | 0                 | Hypothetical protein (1)                            | membrane [GO:0016020 cellular_component] (1); ion channel activity [GO:0005216 molecular_function] (1); transmembrane transport [GO:0050805 biological_process] (1); ion transport [GO:0006611 biological_process] (1)                                                                                                                                                                     | Cyclic nucleotide-binding domain [IPR006951] (1); ion transport domain [IPR005621] (1); Cyclic nucleotide-binding-like [IPR018490] (1); RmcC-like jelly roll fold [IPR014710] (1)                                                                         | -                         | C_unihh_00134_mRNA_11.1 | -                    |
| GF003467 | 0                      | 1                | 0                 | Hypothetical protein (1)                            | -                                                                                                                                                                                                                                                                                                                                                                                          | SGNH hydrolyase-type esterase domain [IPR013830] (1)                                                                                                                                                                                                      | -                         | C_unihh_00133_mRNA_9.1  | -                    |
| GF003466 | 0                      | 1                | 0                 | Hypothetical protein (1)                            | -                                                                                                                                                                                                                                                                                                                                                                                          | -                                                                                                                                                                                                                                                         | -                         | C_unihh_00133_mRNA_62.1 | -                    |
| GF003465 | 0                      | 1                | 0                 | Hypothetical protein (1)                            | -                                                                                                                                                                                                                                                                                                                                                                                          | -                                                                                                                                                                                                                                                         | -                         | C_unihh_00133_mRNA_60.1 | -                    |
| GF003464 | 0                      | 1                | 0                 | Hypothetical protein (1)                            | -                                                                                                                                                                                                                                                                                                                                                                                          | Gag-peptide of LTR copia-type [IPR029472] (1)                                                                                                                                                                                                             | -                         | C_unihh_00133_mRNA_58.1 | -                    |
| GF003463 | 0                      | 1                | 0                 | Hypothetical protein (1)                            | electron transport activity [GO:0009055 molecular_function] (1); iron-sulfur cluster binding [GO:0005156 molecular_function] (1)                                                                                                                                                                                                                                                           | Beta-grasp domain [IPR012675] (1); 2Fe-2S ferredoxin-type iron-sulfur binding domain [IPR001041] (1)                                                                                                                                                      | -                         | C_unihh_00133_mRNA_54.1 | -                    |
| GF003462 | 0                      | 1                | 0                 | ABC transporter B family member 15 (1)              | transport [GO:0006810 biological_process] (1); integral component of membrane [GO:0016021 cellular_component] (1); ATPase activity [GO:0016887 molecular_function] (1); ATP binding [GO:0005524 molecular_function] (1); transmembrane transport [GO:0050805 biological_process] (1); ATPase activity, coupled to transmembrane movement of substances [GO:0045266 molecular_function] (1) | P-loop containing nucleoside triphosphate hydrolase [IPR027417] (1); ABC transporter type 1, transmembrane domain [IPR011527] (1); ABC transporter-like [IPR003439] (1)                                                                                   | -                         | C_unihh_00133_mRNA_53.1 | -                    |
| GF003461 | 0                      | 1                | 0                 | Hypothetical protein (1)                            | -                                                                                                                                                                                                                                                                                                                                                                                          | -                                                                                                                                                                                                                                                         | -                         | C_unihh_00133_mRNA_52.1 | -                    |
| GF003460 | 0                      | 1                | 0                 | Hypothetical protein (1)                            | -                                                                                                                                                                                                                                                                                                                                                                                          | -                                                                                                                                                                                                                                                         | -                         | C_unihh_00133_mRNA_48.1 | -                    |
| GF003459 | 0                      | 1                | 0                 | Hypothetical protein (1)                            | oxidation-reduction process [GO:005114 biological_process] (1); oxidoreductase activity, acting on paired donors, with incorporation or reduction of molecular oxygen [GO:0016765 molecular_function] (1); iron ion binding [GO:0005506 molecular_function] (1); heme binding [GO:0020037 molecular_function] (1)                                                                          | Cytochrome P450, E-class, group 1 [IPR024011] (1); Cytochrome P450 [IPR001128] (1)                                                                                                                                                                        | -                         | C_unihh_00133_mRNA_34.1 | -                    |
| GF003458 | 0                      | 1                | 0                 | Hypothetical protein (1)                            | -                                                                                                                                                                                                                                                                                                                                                                                          | -                                                                                                                                                                                                                                                         | -                         | C_unihh_00133_mRNA_32.1 | -                    |
| GF003457 | 0                      | 1                | 0                 | Hypothetical protein (1)                            | -                                                                                                                                                                                                                                                                                                                                                                                          | -                                                                                                                                                                                                                                                         | -                         | C_unihh_00133_mRNA_30.1 | -                    |
| GF003456 | 0                      | 1                | 0                 | Hypothetical protein (1)                            | binding [GO:0005488 molecular_function] (1)                                                                                                                                                                                                                                                                                                                                                | Armadillo-type fold [IPR016024] (1); Cell morphogenesis protein C-terminal [IPR025481] (1); Cell morphogenesis central region [IPR029473] (1)                                                                                                             | -                         | C_unihh_00133_mRNA_20.1 | -                    |
| GF003455 | 0                      | 1                | 0                 | Hypothetical protein (1)                            | -                                                                                                                                                                                                                                                                                                                                                                                          | -                                                                                                                                                                                                                                                         | -                         | C_unihh_00133_mRNA_17.1 | -                    |
| GF003454 | 0                      | 1                | 0                 | Hypothetical protein (1)                            | -                                                                                                                                                                                                                                                                                                                                                                                          | -                                                                                                                                                                                                                                                         | -                         | C_unihh_00132_mRNA_31.1 | -                    |
| GF003453 | 0                      | 1                | 0                 | Hypothetical protein (1)                            | -                                                                                                                                                                                                                                                                                                                                                                                          | -                                                                                                                                                                                                                                                         | -                         | C_unihh_00132_mRNA_24.1 | -                    |
| GF003452 | 0                      | 1                | 0                 | Potassium channel AKT1 (1)                          | protein binding [GO:0005515 molecular_function] (1)                                                                                                                                                                                                                                                                                                                                        | Cyclic nucleotide-binding-like [IPR018490] (1); Ankyrin repeat [IPR021101] (1); KHA domain [IPR021799] (1); RmcC-like jelly roll fold [IPR014710] (1); Cyclic nucleotide-binding domain [IPR006951] (1); Ankyrin repeat-containing domain [IPR020683] (1) | -                         | C_unihh_00132_mRNA_21.1 | -                    |
| GF003451 | 0                      | 1                | 0                 | Hypothetical protein (1)                            | -                                                                                                                                                                                                                                                                                                                                                                                          | -                                                                                                                                                                                                                                                         | -                         | C_unihh_00132_mRNA_19.1 | -                    |
| GF003450 | 0                      | 1                | 0                 | Hypothetical protein (1)                            | zinc ion binding [GO:0008270 molecular_function] (1); nucleic acid binding [GO:0003676 molecular_function] (1)                                                                                                                                                                                                                                                                             | Zinc finger, CCHC-type [IPR001878] (1)                                                                                                                                                                                                                    | -                         | C_unihh_00132_mRNA_18.1 | -                    |
| GF003449 | 0                      | 1                | 0                 | Hypothetical protein (1)                            | -                                                                                                                                                                                                                                                                                                                                                                                          | -                                                                                                                                                                                                                                                         | -                         | C_unihh_00132_mRNA_16.1 | -                    |
| GF003448 | 0                      | 1                | 0                 | Hypothetical protein (1)                            | -                                                                                                                                                                                                                                                                                                                                                                                          | -                                                                                                                                                                                                                                                         | -                         | C_unihh_00132_mRNA_12.1 | -                    |

| ID       | Num. in C. crottenstei | Num. in C. auris | Num. in P. putida | Note                                                                                                          | GO                                                                                                                                                                                                                                                                                                                                                                                                                                                                                                        | InterPro                                                                                                                                                                                                                                                                                                                                                                           | Members in C. crottenstei | Members in C. auris | Members in P. putida |
|----------|------------------------|------------------|-------------------|---------------------------------------------------------------------------------------------------------------|-----------------------------------------------------------------------------------------------------------------------------------------------------------------------------------------------------------------------------------------------------------------------------------------------------------------------------------------------------------------------------------------------------------------------------------------------------------------------------------------------------------|------------------------------------------------------------------------------------------------------------------------------------------------------------------------------------------------------------------------------------------------------------------------------------------------------------------------------------------------------------------------------------|---------------------------|---------------------|----------------------|
| GF003047 | 0                      | 1                | 1                 | 0 L-type lectin-domain containing receptor kinase IV.1 (1)                                                    | ATP binding [GO:0005524 molecular_function] (1); protein kinase activity [GO:0004672 molecular_function] (1); carbohydrate binding [GO:0003026 molecular_function] (1); protein phosphorylation [GO:0006468 biological_process] (1)                                                                                                                                                                                                                                                                       | Serine/threonine/dual specificity protein kinase, catalytic domain [IPRO0296] (1); Serine/threonine-protein kinase, active site [IPRO0271] (1); Protein kinase, ATP binding site [IPRO1741] (1); Concavallin A-like lectin/glycanase domain [IPRO1220] (1); Legume lectin domain [IPRO1220] (1); Protein kinase-like domain [IPRO11099] (1); Protein kinase domain [IPRO00719] (1) | C_umbii_00131_mRNA_6.1    | -                   |                      |
| GF003046 | 0                      | 1                | 1                 | 0 Hypothetical protein (1)                                                                                    | oxidoreductase activity [GO:0016491 molecular_function] (1); oxidation-reduction process [GO:0055114 biological_process] (1); FAD binding [GO:0071949 molecular_function] (1)                                                                                                                                                                                                                                                                                                                             | FAD/NAD(P)-binding domain [IPRO23753] (1); FAD-binding domain [IPRO02938] (1)                                                                                                                                                                                                                                                                                                      | C_umbii_00131_mRNA_59.1   | -                   |                      |
| GF003045 | 0                      | 1                | 1                 | 0 Hypothetical protein (1)                                                                                    |                                                                                                                                                                                                                                                                                                                                                                                                                                                                                                           |                                                                                                                                                                                                                                                                                                                                                                                    | C_umbii_00131_mRNA_5.1    | -                   |                      |
| GF003044 | 0                      | 1                | 1                 | 0 DNA repair protein rhp7 (1)                                                                                 |                                                                                                                                                                                                                                                                                                                                                                                                                                                                                                           | Leucine-rich repeat domain, I domain-like [IPRO2675] (1); Leucine-rich repeat, cysteine-containing subtype [IPRO06053] (1)                                                                                                                                                                                                                                                         | C_umbii_00131_mRNA_41.1   | -                   |                      |
| GF003043 | 0                      | 1                | 1                 | 0 Putative transporter MCH1 (1)                                                                               |                                                                                                                                                                                                                                                                                                                                                                                                                                                                                                           | Major facilitator superfamily domain [IPRO28061] (1); Nucleo-like [IPRO10658] (1)                                                                                                                                                                                                                                                                                                  | C_umbii_00131_mRNA_40.1   | -                   |                      |
| GF003042 | 0                      | 1                | 1                 | 0 Hypothetical protein (1)                                                                                    | cysteine-type peptidase activity [GO:0008234 molecular_function] (1); proteolysis [GO:0006508 biological_process] (1)                                                                                                                                                                                                                                                                                                                                                                                     | Upl1 protease family, C-terminal catalytic domain [IPRO30453] (1)                                                                                                                                                                                                                                                                                                                  | C_umbii_00131_mRNA_4.1    | -                   |                      |
| GF003041 | 0                      | 1                | 1                 | 0 Hypothetical protein (1)                                                                                    |                                                                                                                                                                                                                                                                                                                                                                                                                                                                                                           |                                                                                                                                                                                                                                                                                                                                                                                    | C_umbii_00131_mRNA_2.1    | -                   |                      |
| GF003040 | 0                      | 1                | 1                 | 0 Hypothetical protein (1)                                                                                    |                                                                                                                                                                                                                                                                                                                                                                                                                                                                                                           |                                                                                                                                                                                                                                                                                                                                                                                    | C_umbii_00131_mRNA_15.1   | -                   |                      |
| GF003039 | 0                      | 1                | 1                 | 0 Hypothetical protein (1)                                                                                    |                                                                                                                                                                                                                                                                                                                                                                                                                                                                                                           |                                                                                                                                                                                                                                                                                                                                                                                    | C_umbii_00131_mRNA_12.1   | -                   |                      |
| GF003038 | 0                      | 1                | 1                 | 0 Hypothetical protein (1)                                                                                    | hydrolase activity, acting on acid anhydrides, catalyzing transmembrane movement of substance [GO:0006020 molecular_function] (1); ATP hydrolysis coupled protein transport [GO:0015991 biological_process] (1); binding [GO:0005488 molecular_function] (1); heme binding [GO:0002017 molecular_function] (1); vacuolar protein transporting V-type ATPase, V1 domain [GO:0000221 cellular_component] (1); proton-transporting ATPase activity, rotational mechanism [GO:0004961 molecular_function] (1) | ATPase, V1 complex, subunit H, C-terminal [IPRO11987] (1); Cytochrome b5 heme-binding site [IPRO18906] (1); Armadillo-type fold [IPRO16024] (1); ATPase, V1 complex, subunit H [IPRO04901] (1); Armadillo-like helical [IPRO11989] (1)                                                                                                                                             | C_umbii_00130_mRNA_61.1   | -                   |                      |
| GF003037 | 0                      | 1                | 1                 | 0 Hypothetical protein (1)                                                                                    |                                                                                                                                                                                                                                                                                                                                                                                                                                                                                                           |                                                                                                                                                                                                                                                                                                                                                                                    | C_umbii_00130_mRNA_6.1    | -                   |                      |
| GF003036 | 0                      | 1                | 1                 | 0 Hypothetical protein (1)                                                                                    |                                                                                                                                                                                                                                                                                                                                                                                                                                                                                                           |                                                                                                                                                                                                                                                                                                                                                                                    | C_umbii_00130_mRNA_49.1   | -                   |                      |
| GF003035 | 0                      | 1                | 1                 | 0 Hypothetical protein (1)                                                                                    |                                                                                                                                                                                                                                                                                                                                                                                                                                                                                                           |                                                                                                                                                                                                                                                                                                                                                                                    | C_umbii_00130_mRNA_46.1   | -                   |                      |
| GF003034 | 0                      | 1                | 1                 | 0 Hypothetical protein (1)                                                                                    |                                                                                                                                                                                                                                                                                                                                                                                                                                                                                                           |                                                                                                                                                                                                                                                                                                                                                                                    | C_umbii_00130_mRNA_4.1    | -                   |                      |
| GF003033 | 0                      | 1                | 1                 | 0 Pentatricopeptide repeat-containing protein At1g31790 (1)                                                   |                                                                                                                                                                                                                                                                                                                                                                                                                                                                                                           | Pentatricopeptide repeat [IPRO02885] (4)                                                                                                                                                                                                                                                                                                                                           | C_umbii_00130_mRNA_25.1   | -                   |                      |
| GF003032 | 0                      | 1                | 1                 | 0 Hypothetical protein (1)                                                                                    | nucleic acid binding [GO:0003676 molecular_function] (1); zinc ion binding [GO:0008270 molecular_function] (1)                                                                                                                                                                                                                                                                                                                                                                                            | Zinc knuckle, CXXC/CHRC [IPRO25835] (1); Zinc finger, CCHC-type [IPRO01878] (1); Endonuclease/cysteineless phosphatase [IPRO05135] (1); Domain of unknown function DUF4261 [IPRO25558] (1)                                                                                                                                                                                         | C_umbii_00130_mRNA_21.1   | -                   |                      |
| GF003031 | 0                      | 1                | 1                 | 0 Hypothetical protein (1)                                                                                    |                                                                                                                                                                                                                                                                                                                                                                                                                                                                                                           |                                                                                                                                                                                                                                                                                                                                                                                    | C_umbii_00130_mRNA_20.1   | -                   |                      |
| GF003030 | 0                      | 1                | 1                 | 0 Hypothetical protein (1)                                                                                    |                                                                                                                                                                                                                                                                                                                                                                                                                                                                                                           |                                                                                                                                                                                                                                                                                                                                                                                    | C_umbii_00129_mRNA_6.1    | -                   |                      |
| GF003029 | 0                      | 1                | 1                 | 0 Hypothetical protein (1)                                                                                    |                                                                                                                                                                                                                                                                                                                                                                                                                                                                                                           |                                                                                                                                                                                                                                                                                                                                                                                    | C_umbii_00129_mRNA_42.1   | -                   |                      |
| GF003028 | 0                      | 1                | 1                 | 0 GDP-mannose transporter GONST3 (1)                                                                          |                                                                                                                                                                                                                                                                                                                                                                                                                                                                                                           | Sugar phosphate transporter domain [IPRO04853] (1)                                                                                                                                                                                                                                                                                                                                 | C_umbii_00129_mRNA_25.1   | -                   |                      |
| GF003027 | 0                      | 1                | 1                 | 0 Hypothetical protein (1)                                                                                    | proteolysis [GO:0006508 biological_process] (1); aspartic-type endopeptidase activity [GO:0004190 molecular_function] (1)                                                                                                                                                                                                                                                                                                                                                                                 | Aspartic peptidase domain [IPRO21109] (1); Xylosidase inhibitor, C-terminal [IPRO32799] (1); Aspartic peptidase A1 family [IPRO01461] (1)                                                                                                                                                                                                                                          | C_umbii_00129_mRNA_2.1    | -                   |                      |
| GF003026 | 0                      | 1                | 1                 | 0 Hypothetical protein (1)                                                                                    |                                                                                                                                                                                                                                                                                                                                                                                                                                                                                                           |                                                                                                                                                                                                                                                                                                                                                                                    | C_umbii_00129_mRNA_15.1   | -                   |                      |
| GF003025 | 0                      | 1                | 1                 | 0 Hypothetical protein (1)                                                                                    |                                                                                                                                                                                                                                                                                                                                                                                                                                                                                                           |                                                                                                                                                                                                                                                                                                                                                                                    | C_umbii_00128_mRNA_8.1    | -                   |                      |
| GF003024 | 0                      | 1                | 1                 | 0 Hypothetical protein (1)                                                                                    |                                                                                                                                                                                                                                                                                                                                                                                                                                                                                                           |                                                                                                                                                                                                                                                                                                                                                                                    | C_umbii_00128_mRNA_6.1    | -                   |                      |
| GF003023 | 0                      | 1                | 1                 | 0 Hypothetical protein (1)                                                                                    |                                                                                                                                                                                                                                                                                                                                                                                                                                                                                                           |                                                                                                                                                                                                                                                                                                                                                                                    | C_umbii_00128_mRNA_51.1   | -                   |                      |
| GF003022 | 0                      | 1                | 1                 | 0 Hypothetical protein (1)                                                                                    | zinc ion binding [GO:0008270 molecular_function] (1); nucleic acid binding [GO:0003676 molecular_function] (1)                                                                                                                                                                                                                                                                                                                                                                                            | Transposase-associated domain [IPRO29480] (1); Zinc finger, CCHC-type [IPRO01878] (1)                                                                                                                                                                                                                                                                                              | C_umbii_00128_mRNA_45.1   | -                   |                      |
| GF003021 | 0                      | 1                | 1                 | 0 Hypothetical protein (1)                                                                                    |                                                                                                                                                                                                                                                                                                                                                                                                                                                                                                           |                                                                                                                                                                                                                                                                                                                                                                                    | C_umbii_00128_mRNA_42.1   | -                   |                      |
| GF003020 | 0                      | 1                | 1                 | 0 Bitransferal inhibitor/ligand-transfer or protein seed storage 2S albumin superfamily protein, putative (1) | lipid binding [GO:0008289 molecular_function] (1); lipid transport [GO:0006869 biological_process] (1)                                                                                                                                                                                                                                                                                                                                                                                                    | Plant lipid transfer protein/Par allergen [IPRO05259] (1); Bitransferal inhibitor/ligand transfer protein/seed storage helical domain [IPRO16140] (1)                                                                                                                                                                                                                              | C_umbii_00128_mRNA_39.1   | -                   |                      |
| GF003019 | 0                      | 1                | 1                 | 0 Hypothetical protein (1)                                                                                    |                                                                                                                                                                                                                                                                                                                                                                                                                                                                                                           |                                                                                                                                                                                                                                                                                                                                                                                    | C_umbii_00128_mRNA_38.1   | -                   |                      |
| GF003018 | 0                      | 1                | 1                 | 0 Hypothetical protein (1)                                                                                    |                                                                                                                                                                                                                                                                                                                                                                                                                                                                                                           |                                                                                                                                                                                                                                                                                                                                                                                    | C_umbii_00128_mRNA_37.1   | -                   |                      |
| GF003017 | 0                      | 1                | 1                 | 0 Hypothetical protein (1)                                                                                    |                                                                                                                                                                                                                                                                                                                                                                                                                                                                                                           |                                                                                                                                                                                                                                                                                                                                                                                    | C_umbii_00128_mRNA_36.1   | -                   |                      |
| GF003016 | 0                      | 1                | 1                 | 0 Hypothetical protein (1)                                                                                    | nucleic acid binding [GO:0003676 molecular_function] (1); proteolysis [GO:0006508 biological_process] (1); zinc ion binding [GO:0008270 molecular_function] (1); aspartic-type endopeptidase activity [GO:0004190 molecular_function] (1)                                                                                                                                                                                                                                                                 | Peptidase A2A, retrovirus, catalytic [IPRO01895] (1); Retropepsin [IPRO18061] (1); Zinc finger, CCHC-type [IPRO01878] (1); Aspartic peptidase domain [IPRO21109] (1)                                                                                                                                                                                                               | C_umbii_00128_mRNA_35.1   | -                   |                      |
| GF003015 | 0                      | 1                | 1                 | 0 Hypothetical protein (1)                                                                                    |                                                                                                                                                                                                                                                                                                                                                                                                                                                                                                           |                                                                                                                                                                                                                                                                                                                                                                                    | C_umbii_00128_mRNA_32.1   | -                   |                      |
| GF003014 | 0                      | 1                | 1                 | 0 Hypothetical protein (1)                                                                                    |                                                                                                                                                                                                                                                                                                                                                                                                                                                                                                           |                                                                                                                                                                                                                                                                                                                                                                                    | C_umbii_00128_mRNA_24.1   | -                   |                      |
| GF003013 | 0                      | 1                | 1                 | 0 Hypothetical protein (1)                                                                                    |                                                                                                                                                                                                                                                                                                                                                                                                                                                                                                           |                                                                                                                                                                                                                                                                                                                                                                                    | C_umbii_00128_mRNA_22.1   | -                   |                      |
| GF003012 | 0                      | 1                | 1                 | 0 Hypothetical protein (1)                                                                                    |                                                                                                                                                                                                                                                                                                                                                                                                                                                                                                           |                                                                                                                                                                                                                                                                                                                                                                                    | C_umbii_00128_mRNA_21.1   | -                   |                      |
| GF003011 | 0                      | 1                | 1                 | 0 Hypothetical protein (1)                                                                                    |                                                                                                                                                                                                                                                                                                                                                                                                                                                                                                           |                                                                                                                                                                                                                                                                                                                                                                                    | C_umbii_00128_mRNA_17.1   | -                   |                      |
| GF003010 | 0                      | 1                | 1                 | 0 Hypothetical protein (1)                                                                                    |                                                                                                                                                                                                                                                                                                                                                                                                                                                                                                           |                                                                                                                                                                                                                                                                                                                                                                                    | C_umbii_00128_mRNA_13.1   | -                   |                      |
| GF003009 | 0                      | 1                | 1                 | 0 Hypothetical protein (1)                                                                                    |                                                                                                                                                                                                                                                                                                                                                                                                                                                                                                           |                                                                                                                                                                                                                                                                                                                                                                                    | C_umbii_00128_mRNA_1.1    | -                   |                      |
| GF003008 | 0                      | 1                | 1                 | 0 Hypothetical protein (1)                                                                                    | cysteine-type peptidase activity [GO:0008234 molecular_function] (1); proteolysis [GO:0006508 biological_process] (1)                                                                                                                                                                                                                                                                                                                                                                                     | Upl1 protease family, C-terminal catalytic domain [IPRO30453] (1)                                                                                                                                                                                                                                                                                                                  | C_umbii_00127_mRNA_7.1    | -                   |                      |
| GF003007 | 0                      | 1                | 1                 | 0 Hypothetical protein (1)                                                                                    |                                                                                                                                                                                                                                                                                                                                                                                                                                                                                                           |                                                                                                                                                                                                                                                                                                                                                                                    | C_umbii_00127_mRNA_6.1    | -                   |                      |
| GF003006 | 0                      | 1                | 1                 | 0 Phenoxymethyl benzylic ether reductase (1)                                                                  |                                                                                                                                                                                                                                                                                                                                                                                                                                                                                                           | NAD(P)-binding domain [IPRO16040] (1); Nucleo-like domain [IPRO08010] (1)                                                                                                                                                                                                                                                                                                          | C_umbii_00127_mRNA_51.1   | -                   |                      |
| GF003005 | 0                      | 1                | 1                 | 0 Hypothetical protein (1)                                                                                    | metal ion transport [GO:0030001 biological_process] (1); metal ion binding [GO:0046872 molecular_function] (1)                                                                                                                                                                                                                                                                                                                                                                                            | Heavy metal-associated domain, HMA [IPRO06121] (1)                                                                                                                                                                                                                                                                                                                                 | C_umbii_00127_mRNA_37.1   | -                   |                      |
| GF003004 | 0                      | 1                | 1                 | 0 Hypothetical protein (1)                                                                                    |                                                                                                                                                                                                                                                                                                                                                                                                                                                                                                           |                                                                                                                                                                                                                                                                                                                                                                                    | C_umbii_00127_mRNA_20.1   | -                   |                      |
| GF003003 | 0                      | 1                | 1                 | 0 Hypothetical protein (1)                                                                                    |                                                                                                                                                                                                                                                                                                                                                                                                                                                                                                           |                                                                                                                                                                                                                                                                                                                                                                                    | C_umbii_00127_mRNA_19.1   | -                   |                      |
| GF003002 | 0                      | 1                | 1                 | 0 Hypothetical protein (1)                                                                                    |                                                                                                                                                                                                                                                                                                                                                                                                                                                                                                           |                                                                                                                                                                                                                                                                                                                                                                                    | C_umbii_00127_mRNA_18.1   | -                   |                      |
| GF003001 | 0                      | 1                | 1                 | 0 Hypothetical protein (1)                                                                                    |                                                                                                                                                                                                                                                                                                                                                                                                                                                                                                           |                                                                                                                                                                                                                                                                                                                                                                                    | C_umbii_00127_mRNA_17.1   | -                   |                      |
| GF003000 | 0                      | 1                | 1                 | 0 Hypothetical protein (1)                                                                                    |                                                                                                                                                                                                                                                                                                                                                                                                                                                                                                           |                                                                                                                                                                                                                                                                                                                                                                                    | C_umbii_00127_mRNA_16.1   | -                   |                      |
| GF004999 | 0                      | 1                | 1                 | 0 Hypothetical protein (1)                                                                                    |                                                                                                                                                                                                                                                                                                                                                                                                                                                                                                           |                                                                                                                                                                                                                                                                                                                                                                                    | C_umbii_00127_mRNA_15.1   | -                   |                      |
| GF004998 | 0                      | 1                | 1                 | 0 Hypothetical protein (1)                                                                                    |                                                                                                                                                                                                                                                                                                                                                                                                                                                                                                           |                                                                                                                                                                                                                                                                                                                                                                                    | C_umbii_00127_mRNA_12.1   | -                   |                      |
| GF004997 | 0                      | 1                | 1                 | 0 Hypothetical protein (1)                                                                                    | DNA binding [GO:0003677 molecular_function] (1)                                                                                                                                                                                                                                                                                                                                                                                                                                                           | Zinc finger, BED-type [IPRO03656] (1)                                                                                                                                                                                                                                                                                                                                              | C_umbii_00126_mRNA_53.1   | -                   |                      |
| GF004996 | 0                      | 1                | 1                 | 0 Hypothetical protein (1)                                                                                    | metabolic process [GO:0008152 biological_process] (1); oxidoreductase activity, acting on the C-S/OH group of donors, NAD or NADP as acceptor [GO:0016616 molecular_function] (1); NAD binding [GO:001287 molecular_function] (1); oxidation-reduction process [GO:0055114 biological_process] (1)                                                                                                                                                                                                        | Di-isomer specific 2-hydroxycyclo dehydrogenase, catalytic domain [IPRO06139] (1); Isopeptidase N [IPRO07443] (1); NAD(P)-binding domain [IPRO16040] (1)                                                                                                                                                                                                                           | C_umbii_00126_mRNA_29.1   | -                   |                      |
| GF004995 | 0                      | 1                | 1                 | 0 Hypothetical protein (1)                                                                                    | proteolysis [GO:0006508 biological_process] (1); serine-type endopeptidase activity [GO:0004252 molecular_function] (1)                                                                                                                                                                                                                                                                                                                                                                                   | Peptidase S8 propeptide/proteinase inhibitor 19 [IPRO10259] (1); Peptidase S8, subfamily [IPRO2828] (1); Peptidase S8, subfamily-related [IPRO15500] (1); Peptidase S8/S83 domain [IPRO00209] (1)                                                                                                                                                                                  | C_umbii_00126_mRNA_22.1   | -                   |                      |
| GF004994 | 0                      | 1                | 1                 | 0 Adenosine 2'-phospho 5'-phosphothalidate transporter 2 (1)                                                  | ATP binding [GO:0005524 molecular_function] (1); transmembrane transport [GO:0055085 biological_process] (1); protein kinase activity [GO:0004672 molecular_function] (1); protein phosphorylation [GO:0006468 biological_process] (1)                                                                                                                                                                                                                                                                    | UAA transporter [IPRO13657] (1); Protein kinase domain [IPRO00719] (1); Protein kinase-like domain [IPRO11099] (1); Serine/threonine/dual specificity protein kinase, catalytic domain [IPRO0296] (1)                                                                                                                                                                              | C_umbii_00126_mRNA_16.1   | -                   |                      |
| GF004993 | 0                      | 1                | 1                 | 0 Hypothetical protein (1)                                                                                    |                                                                                                                                                                                                                                                                                                                                                                                                                                                                                                           |                                                                                                                                                                                                                                                                                                                                                                                    | C_umbii_00125_mRNA_8.1    | -                   |                      |
| GF004992 | 0                      | 1                | 1                 | 0 Hypothetical protein (1)                                                                                    |                                                                                                                                                                                                                                                                                                                                                                                                                                                                                                           |                                                                                                                                                                                                                                                                                                                                                                                    | C_umbii_00125_mRNA_7.1    | -                   |                      |
| GF004991 | 0                      | 1                | 1                 | 0 Hypothetical protein (1)                                                                                    | protein binding [GO:0005515 molecular_function] (1)                                                                                                                                                                                                                                                                                                                                                                                                                                                       | Leucine-rich repeat [IPRO01611] (1); Leucine-rich repeat domain, I domain-like [IPRO2675] (1)                                                                                                                                                                                                                                                                                      | C_umbii_00125_mRNA_68.1   | -                   |                      |
| GF004990 | 0                      | 1                | 1                 | 0 Hypothetical protein (1)                                                                                    |                                                                                                                                                                                                                                                                                                                                                                                                                                                                                                           |                                                                                                                                                                                                                                                                                                                                                                                    | C_umbii_00125_mRNA_6.1    | -                   |                      |
| GF004989 | 0                      | 1                | 1                 | 0 Monosaccharide transport protein (1)                                                                        |                                                                                                                                                                                                                                                                                                                                                                                                                                                                                                           |                                                                                                                                                                                                                                                                                                                                                                                    | C_umbii_00125_mRNA_4.1    | -                   |                      |
| GF004988 | 0                      | 1                | 1                 | 0 Hypothetical protein (1)                                                                                    |                                                                                                                                                                                                                                                                                                                                                                                                                                                                                                           |                                                                                                                                                                                                                                                                                                                                                                                    | C_umbii_00125_mRNA_27.1   | -                   |                      |
| GF004987 | 0                      | 1                | 1                 | 0 Hypothetical protein (1)                                                                                    |                                                                                                                                                                                                                                                                                                                                                                                                                                                                                                           |                                                                                                                                                                                                                                                                                                                                                                                    | C_umbii_00125_mRNA_11.1   | -                   |                      |
| GF004986 | 0                      | 1                | 1                 | 0 Adenyltransferase and sulfatransferase (1)                                                                  | small protein activating enzyme activity [GO:0008641 molecular_function] (1)                                                                                                                                                                                                                                                                                                                                                                                                                              | NAD(P)-binding domain [IPRO16040] (1); THH-type NAD/FAD binding fold [IPRO05944] (1)                                                                                                                                                                                                                                                                                               | C_umbii_00125_mRNA_1.1    | -                   |                      |
| GF004985 | 0                      | 1                | 1                 | 0 Hypothetical protein (1)                                                                                    |                                                                                                                                                                                                                                                                                                                                                                                                                                                                                                           |                                                                                                                                                                                                                                                                                                                                                                                    | C_umbii_00124_mRNA_9.1    | -                   |                      |
| GF004984 | 0                      | 1                | 1                 | 0 Hypothetical protein (1)                                                                                    |                                                                                                                                                                                                                                                                                                                                                                                                                                                                                                           |                                                                                                                                                                                                                                                                                                                                                                                    | C_umbii_00124_mRNA_6.1    | -                   |                      |
| GF004983 | 0                      | 1                | 1                 | 0 Hypothetical protein (1)                                                                                    | protein binding [GO:0005515 molecular_function] (1)                                                                                                                                                                                                                                                                                                                                                                                                                                                       | Cohesin loading factor [IPRO19440] (1); Tetrahydrofolate-like helical domain [IPRO11990] (1)                                                                                                                                                                                                                                                                                       | C_umbii_00124_mRNA_41.1   | -                   |                      |
| GF004982 | 0                      | 1                | 1                 | 0 Hypothetical protein (1)                                                                                    |                                                                                                                                                                                                                                                                                                                                                                                                                                                                                                           |                                                                                                                                                                                                                                                                                                                                                                                    | C_umbii_00124_mRNA_4.1    | -                   |                      |
| GF004981 | 0                      | 1                | 1                 | 0 Hypothetical protein (1)                                                                                    |                                                                                                                                                                                                                                                                                                                                                                                                                                                                                                           |                                                                                                                                                                                                                                                                                                                                                                                    | C_umbii_00124_mRNA_38.1   | -                   |                      |
| GF004980 | 0                      | 1                | 1                 | 0 Retronasom protein, putative, Tyl. copu subclass (1)                                                        | zinc ion binding [GO:0008270 molecular_function] (1); nucleic acid binding [GO:0003676 molecular_function] (1)                                                                                                                                                                                                                                                                                                                                                                                            | Zinc finger, CCHC-type [IPRO01878] (1); GAG-gag-arg-gag domain [IPRO25724] (1)                                                                                                                                                                                                                                                                                                     | C_umbii_00124_mRNA_36.1   | -                   |                      |
| GF004979 | 0                      | 1                | 1                 | 0 Hypothetical protein (1)                                                                                    |                                                                                                                                                                                                                                                                                                                                                                                                                                                                                                           |                                                                                                                                                                                                                                                                                                                                                                                    | C_umbii_00124_mRNA_34.1   | -                   |                      |

| ID        | Num. in C. crottenstei | Num. in C. auris | Num. in P. putida | Note                                                                              | GO                                                                                                                                                                                                                                                                                                                | InterPro                                                                                                                                                                                                                                                                                                                                                                                                                                                                     | Members in C. crottenstei | Members in C. auris | Members in P. putida |
|-----------|------------------------|------------------|-------------------|-----------------------------------------------------------------------------------|-------------------------------------------------------------------------------------------------------------------------------------------------------------------------------------------------------------------------------------------------------------------------------------------------------------------|------------------------------------------------------------------------------------------------------------------------------------------------------------------------------------------------------------------------------------------------------------------------------------------------------------------------------------------------------------------------------------------------------------------------------------------------------------------------------|---------------------------|---------------------|----------------------|
| GF0034978 | 0                      | 1                | 0                 | Hypothetical protein (1)                                                          | nucleic acid binding [GO:0003676 molecular_function] (1); protein dimerization activity [GO:0046983 molecular_function] (1)                                                                                                                                                                                       | Ribonuclease H-like domain [IPR012337] (1); HAT, C-terminal dimerization domain [IPR009661] (1)                                                                                                                                                                                                                                                                                                                                                                              | C_ushii_00124_mRNA_32.1   | -                   | -                    |
| GF0034977 | 0                      | 1                | 0                 | Hypothetical protein (1)                                                          |                                                                                                                                                                                                                                                                                                                   | Endonuclease/exonuclease/phosphatase [IPR005135] (1)                                                                                                                                                                                                                                                                                                                                                                                                                         | C_ushii_00124_mRNA_31.1   | -                   | -                    |
| GF0034976 | 0                      | 1                | 0                 | Hypothetical protein (1)                                                          |                                                                                                                                                                                                                                                                                                                   |                                                                                                                                                                                                                                                                                                                                                                                                                                                                              | C_ushii_00124_mRNA_24.1   | -                   | -                    |
| GF0034975 | 0                      | 1                | 0                 | Hypothetical protein (1)                                                          |                                                                                                                                                                                                                                                                                                                   |                                                                                                                                                                                                                                                                                                                                                                                                                                                                              | C_ushii_00124_mRNA_22.1   | -                   | -                    |
| GF0034974 | 0                      | 1                | 0                 | Hypothetical protein (1)                                                          |                                                                                                                                                                                                                                                                                                                   | S-adenosyl-L-methionine-dependent methyltransferase [IPR029063] (1)                                                                                                                                                                                                                                                                                                                                                                                                          | C_ushii_00124_mRNA_21.1   | -                   | -                    |
| GF0034973 | 0                      | 1                | 0                 | Hypothetical protein (1)                                                          |                                                                                                                                                                                                                                                                                                                   |                                                                                                                                                                                                                                                                                                                                                                                                                                                                              | C_ushii_00124_mRNA_18.1   | -                   | -                    |
| GF0034972 | 0                      | 1                | 0                 | Nucleolar GTP-binding protein 1 (1)                                               | GTP binding [GO:0005525 molecular_function] (1)                                                                                                                                                                                                                                                                   | NOG, C-terminal [IPR012973] (1); GTP binding domain [IPR006073] (1); P-loop containing nucleoside triphosphate hydrolase [IPR027437] (1)                                                                                                                                                                                                                                                                                                                                     | C_ushii_00124_mRNA_17.1   | -                   | -                    |
| GF0034971 | 0                      | 1                | 0                 | Hypothetical protein (1)                                                          | nucleic acid binding [GO:0003676 molecular_function] (1); intracellular [GO:0005622 cellular_component] (1); translation [GO:0006412 biological_process] (1); structural constituent of ribosome [GO:0003735 molecular_function] (1); ribosome [GO:0005840 cellular_component] (1)                                | Ribonuclease H-like domain [IPR012337] (1)                                                                                                                                                                                                                                                                                                                                                                                                                                   | C_ushii_00123_mRNA_62.1   | -                   | -                    |
| GF0034970 | 0                      | 1                | 0                 | Hypothetical protein (1)                                                          |                                                                                                                                                                                                                                                                                                                   | Ribosomal protein L27 [IPR001684] (1)                                                                                                                                                                                                                                                                                                                                                                                                                                        | C_ushii_00123_mRNA_59.1   | -                   | -                    |
| GF0034969 | 0                      | 1                | 0                 | Hypothetical protein (1)                                                          |                                                                                                                                                                                                                                                                                                                   |                                                                                                                                                                                                                                                                                                                                                                                                                                                                              | C_ushii_00123_mRNA_57.1   | -                   | -                    |
| GF0034968 | 0                      | 1                | 0                 | Hypothetical protein (1)                                                          |                                                                                                                                                                                                                                                                                                                   |                                                                                                                                                                                                                                                                                                                                                                                                                                                                              | C_ushii_00123_mRNA_56.1   | -                   | -                    |
| GF0034967 | 0                      | 1                | 0                 | Fluorenyl-sulfonamide family/ radical SAM domain-containing protein isoform 1 (1) | iron-sulfur cluster binding [GO:0051536 molecular_function] (1); catalytic activity [GO:0003824 molecular_function] (1)                                                                                                                                                                                           | Aldolase-type TIM barrel [IPR013785] (1); rRNA synthetase-synthesis [IPR013917] (1); Radical SAM [IPR007197] (1); Fluorenyl-sulfonamide-like domain [IPR029039] (1)                                                                                                                                                                                                                                                                                                          | C_ushii_00123_mRNA_51.1   | -                   | -                    |
| GF0034966 | 0                      | 1                | 0                 | Hypothetical protein (1)                                                          |                                                                                                                                                                                                                                                                                                                   |                                                                                                                                                                                                                                                                                                                                                                                                                                                                              | C_ushii_00123_mRNA_47.1   | -                   | -                    |
| GF0034965 | 0                      | 1                | 0                 | Hypothetical protein (1)                                                          |                                                                                                                                                                                                                                                                                                                   | Protein of unknown function DUF620 [IPR006873] (1)                                                                                                                                                                                                                                                                                                                                                                                                                           | C_ushii_00123_mRNA_42.1   | -                   | -                    |
| GF0034964 | 0                      | 1                | 0                 | Hypothetical protein (1)                                                          |                                                                                                                                                                                                                                                                                                                   |                                                                                                                                                                                                                                                                                                                                                                                                                                                                              | C_ushii_00123_mRNA_33.1   | -                   | -                    |
| GF0034963 | 0                      | 1                | 0                 | Hypothetical protein (1)                                                          |                                                                                                                                                                                                                                                                                                                   |                                                                                                                                                                                                                                                                                                                                                                                                                                                                              | C_ushii_00123_mRNA_32.1   | -                   | -                    |
| GF0034962 | 0                      | 1                | 0                 | Hypothetical protein (1)                                                          |                                                                                                                                                                                                                                                                                                                   |                                                                                                                                                                                                                                                                                                                                                                                                                                                                              | C_ushii_00123_mRNA_29.1   | -                   | -                    |
| GF0034961 | 0                      | 1                | 0                 | Hypothetical protein (1)                                                          |                                                                                                                                                                                                                                                                                                                   |                                                                                                                                                                                                                                                                                                                                                                                                                                                                              | C_ushii_00123_mRNA_28.1   | -                   | -                    |
| GF0034960 | 0                      | 1                | 0                 | Hypothetical protein (1)                                                          |                                                                                                                                                                                                                                                                                                                   |                                                                                                                                                                                                                                                                                                                                                                                                                                                                              | C_ushii_00123_mRNA_27.1   | -                   | -                    |
| GF0034959 | 0                      | 1                | 0                 | Hypothetical protein (1)                                                          | nucleus [GO:0005634 cellular_component] (1)                                                                                                                                                                                                                                                                       | YLP motif-containing protein 1 [IPR026314] (1)                                                                                                                                                                                                                                                                                                                                                                                                                               | C_ushii_00123_mRNA_26.1   | -                   | -                    |
| GF0034958 | 0                      | 1                | 0                 | Hypothetical protein (1)                                                          |                                                                                                                                                                                                                                                                                                                   |                                                                                                                                                                                                                                                                                                                                                                                                                                                                              | C_ushii_00123_mRNA_19.1   | -                   | -                    |
| GF0034957 | 0                      | 1                | 0                 | Hypothetical protein (1)                                                          |                                                                                                                                                                                                                                                                                                                   |                                                                                                                                                                                                                                                                                                                                                                                                                                                                              | C_ushii_00123_mRNA_10.1   | -                   | -                    |
| GF0034956 | 0                      | 1                | 0                 | Hypothetical protein (1)                                                          |                                                                                                                                                                                                                                                                                                                   |                                                                                                                                                                                                                                                                                                                                                                                                                                                                              | C_ushii_00123_mRNA_1.1    | -                   | -                    |
| GF0034955 | 0                      | 1                | 0                 | Hypothetical protein (1)                                                          |                                                                                                                                                                                                                                                                                                                   |                                                                                                                                                                                                                                                                                                                                                                                                                                                                              | C_ushii_00122_mRNA_4.1    | -                   | -                    |
| GF0034954 | 0                      | 1                | 0                 | Hypothetical protein (1)                                                          | regulation of transcription, DNA-templated [GO:0006355 biological_process] (1); zinc ion binding [GO:0008270 molecular_function] (1)                                                                                                                                                                              | FAR1 DNA binding domain [IPR004330] (1); TFI124-FAR1 family [IPR010521] (1); Zinc finger, SWIM-type [IPR007527] (1)                                                                                                                                                                                                                                                                                                                                                          | C_ushii_00122_mRNA_38.1   | -                   | -                    |
| GF0034953 | 0                      | 1                | 0                 | Hypothetical protein (1)                                                          |                                                                                                                                                                                                                                                                                                                   |                                                                                                                                                                                                                                                                                                                                                                                                                                                                              | C_ushii_00122_mRNA_27.1   | -                   | -                    |
| GF0034952 | 0                      | 1                | 0                 | Hypothetical protein (1)                                                          | cysteine-type peptidase activity [GO:0008234 molecular_function] (1); proteolysis [GO:0006958 biological_process] (1)                                                                                                                                                                                             | Ulp1 protease family, C-terminal catalytic domain [IPR006531] (1)                                                                                                                                                                                                                                                                                                                                                                                                            | C_ushii_00122_mRNA_21.1   | -                   | -                    |
| GF0034951 | 0                      | 1                | 0                 | Hypothetical protein (1)                                                          |                                                                                                                                                                                                                                                                                                                   |                                                                                                                                                                                                                                                                                                                                                                                                                                                                              | C_ushii_00122_mRNA_17.1   | -                   | -                    |
| GF0034950 | 0                      | 1                | 0                 | Hypothetical protein (1)                                                          |                                                                                                                                                                                                                                                                                                                   |                                                                                                                                                                                                                                                                                                                                                                                                                                                                              | C_ushii_00122_mRNA_1.1    | -                   | -                    |
| GF0034949 | 0                      | 1                | 0                 | Hypothetical protein (1)                                                          |                                                                                                                                                                                                                                                                                                                   |                                                                                                                                                                                                                                                                                                                                                                                                                                                                              | C_ushii_00121_mRNA_8.1    | -                   | -                    |
| GF0034948 | 0                      | 1                | 0                 | Hypothetical protein (1)                                                          | metal ion binding [GO:0046872 molecular_function] (1); nucleic acid binding [GO:0003676 molecular_function] (1)                                                                                                                                                                                                   | Ubiquitin-conjugating enzyme E2 [IPR006090] (1); Zinc finger, C2H2 [IPR007807] (1); Ubiquitin-conjugating enzyme RWD-like [IPR016135] (1); Zinc finger C2H2-type/interzone DNA-binding domain [IPR013987] (1)                                                                                                                                                                                                                                                                | C_ushii_00121_mRNA_49.1   | -                   | -                    |
| GF0034947 | 0                      | 1                | 0                 | Phosphatidylinositol N-acetylglucosaminyltransferase subunit (1)                  | GPI anchor biosynthetic process [GO:0006006 biological_process] (1); phosphatidylinositol N-acetylglucosaminyltransferase activity [GO:001176 molecular_function] (1); integral component of membrane [GO:0016021 cellular_component] (1)                                                                         | N-acetylglucosaminyltransferase component [IPR007720] (1)                                                                                                                                                                                                                                                                                                                                                                                                                    | C_ushii_00121_mRNA_48.1   | -                   | -                    |
| GF0034946 | 0                      | 1                | 0                 | Hypothetical protein (1)                                                          |                                                                                                                                                                                                                                                                                                                   | Protein of unknown function DUF2343 [IPR018786] (1)                                                                                                                                                                                                                                                                                                                                                                                                                          | C_ushii_00121_mRNA_42.1   | -                   | -                    |
| GF0034945 | 0                      | 1                | 0                 | Hypothetical protein (1)                                                          |                                                                                                                                                                                                                                                                                                                   |                                                                                                                                                                                                                                                                                                                                                                                                                                                                              | C_ushii_00121_mRNA_4.1    | -                   | -                    |
| GF0034944 | 0                      | 1                | 0                 | Hypothetical protein (1)                                                          |                                                                                                                                                                                                                                                                                                                   |                                                                                                                                                                                                                                                                                                                                                                                                                                                                              | C_ushii_00121_mRNA_38.1   | -                   | -                    |
| GF0034943 | 0                      | 1                | 0                 | Plasma membrane ATPase (1)                                                        | ATPase activity [GO:0016887 molecular_function] (1); integral component of membrane [GO:0016021 cellular_component] (1); metal ion binding [GO:0046872 molecular_function] (1); ATP biosynthetic process [GO:0006754 biological_process] (1); nucleotide binding [GO:0000166 molecular_function] (1)              | P-type ATPase, transmembrane domain [IPR023298] (1); P-type ATPase, cytoplasmic domain N [IPR023299] (1); P-type ATPase [IPR001757] (1); P-type ATPase, phosphorylation site [IPR018303] (1); P-type ATPase, N-terminal [IPR004010] (1); HAD-like domain [IPR023214] (1); P-type ATPase, A domain [IPR008250] (1)                                                                                                                                                            | C_ushii_00121_mRNA_36.1   | -                   | -                    |
| GF0034942 | 0                      | 1                | 0                 | Hypothetical protein (1)                                                          | protein phosphorylation [GO:0006468 biological_process] (1); protein kinase activity [GO:0006072 molecular_function] (1); ATP binding [GO:0005524 molecular_function] (1)                                                                                                                                         | Protein kinase, ATP binding site [IPR017441] (1); Serine/threonine-protein kinase catalytic domain [IPR001245] (1); Protein kinase domain [IPR00719] (1); Concavallin A-like lectin phosphatase domain [IPR013200] (1); Maltin-like carbohydrate-binding domain [IPR024788] (1); Protein kinase-like domain [IPR01009] (1)                                                                                                                                                   | C_ushii_00121_mRNA_35.1   | -                   | -                    |
| GF0034941 | 0                      | 1                | 0                 | Hypothetical protein (1)                                                          |                                                                                                                                                                                                                                                                                                                   |                                                                                                                                                                                                                                                                                                                                                                                                                                                                              | C_ushii_00121_mRNA_3.1    | -                   | -                    |
| GF0034940 | 0                      | 1                | 0                 | Serine-threonine kinase STK15 (1)                                                 | ATP binding [GO:0005524 molecular_function] (1); protein kinase activity [GO:0006072 molecular_function] (1); protein phosphorylation [GO:0006468 biological_process] (1)                                                                                                                                         | Protein kinase domain [IPR00719] (1); Protein kinase-like domain [IPR01009] (1); Concavallin A-like lectin phosphatase domain [IPR013200] (1); Maltin-like carbohydrate-binding domain [IPR024788] (1); Protein kinase, ATP binding site [IPR017441] (1); Serine/threonine-protein kinase, active site [IPR008271] (1); Serine/threonine/dual specificity protein kinase, catalytic domain [IPR002290] (1); Serine/threonine-protein kinase catalytic domain [IPR001245] (1) | C_ushii_00121_mRNA_29.1   | -                   | -                    |
| GF0034939 | 0                      | 1                | 0                 | Hypothetical protein (1)                                                          |                                                                                                                                                                                                                                                                                                                   |                                                                                                                                                                                                                                                                                                                                                                                                                                                                              | C_ushii_00121_mRNA_22.1   | -                   | -                    |
| GF0034938 | 0                      | 1                | 0                 | Hypothetical protein (1)                                                          |                                                                                                                                                                                                                                                                                                                   |                                                                                                                                                                                                                                                                                                                                                                                                                                                                              | C_ushii_00121_mRNA_21.1   | -                   | -                    |
| GF0034937 | 0                      | 1                | 0                 | Stem 28 kDa glycoprotein (1)                                                      |                                                                                                                                                                                                                                                                                                                   | Acid phosphatase, class B-like [IPR005191] (1); HAD-like domain [IPR023214] (1)                                                                                                                                                                                                                                                                                                                                                                                              | C_ushii_00121_mRNA_2.1    | -                   | -                    |
| GF0034936 | 0                      | 1                | 0                 | Hypothetical protein (1)                                                          | nucleotide binding [GO:0000166 molecular_function] (1)                                                                                                                                                                                                                                                            | Nucleotide-binding alpha-beta plait domain [IPR012677] (1)                                                                                                                                                                                                                                                                                                                                                                                                                   | C_ushii_00121_mRNA_12.1   | -                   | -                    |
| GF0034935 | 0                      | 1                | 0                 | Hypothetical protein (1)                                                          |                                                                                                                                                                                                                                                                                                                   |                                                                                                                                                                                                                                                                                                                                                                                                                                                                              | C_ushii_00121_mRNA_10.1   | -                   | -                    |
| GF0034934 | 0                      | 1                | 0                 | Hypothetical protein (1)                                                          |                                                                                                                                                                                                                                                                                                                   |                                                                                                                                                                                                                                                                                                                                                                                                                                                                              | C_ushii_00121_mRNA_1.1    | -                   | -                    |
| GF0034933 | 0                      | 1                | 0                 | Hypothetical protein (1)                                                          |                                                                                                                                                                                                                                                                                                                   |                                                                                                                                                                                                                                                                                                                                                                                                                                                                              | C_ushii_00120_mRNA_7.1    | -                   | -                    |
| GF0034932 | 0                      | 1                | 0                 | Hypothetical protein (1)                                                          |                                                                                                                                                                                                                                                                                                                   |                                                                                                                                                                                                                                                                                                                                                                                                                                                                              | C_ushii_00120_mRNA_63.1   | -                   | -                    |
| GF0034931 | 0                      | 1                | 0                 | Hypothetical protein (1)                                                          |                                                                                                                                                                                                                                                                                                                   |                                                                                                                                                                                                                                                                                                                                                                                                                                                                              | C_ushii_00120_mRNA_6.1    | -                   | -                    |
| GF0034930 | 0                      | 1                | 0                 | Hypothetical protein (1)                                                          |                                                                                                                                                                                                                                                                                                                   |                                                                                                                                                                                                                                                                                                                                                                                                                                                                              | C_ushii_00120_mRNA_59.1   | -                   | -                    |
| GF0034929 | 0                      | 1                | 0                 | NADH:ubiquinone oxidoreductase chain 1 (1)                                        | oxidation-reduction process [GO:005114 biological_process] (1); membrane [GO:0016020 cellular_component] (1)                                                                                                                                                                                                      | NADH:ubiquinone oxidoreductase, subunit 1/F420H2 oxidoreductase subunit H [IPR001694] (1)                                                                                                                                                                                                                                                                                                                                                                                    | C_ushii_00120_mRNA_51.1   | -                   | -                    |
| GF0034928 | 0                      | 1                | 0                 | NADH:ubiquinone oxidoreductase chain 1 (1)                                        | oxidation-reduction process [GO:005114 biological_process] (1); membrane [GO:0016020 cellular_component] (1)                                                                                                                                                                                                      | NADH:ubiquinone oxidoreductase, subunit 1/F420H2 oxidoreductase subunit H [IPR001694] (1)                                                                                                                                                                                                                                                                                                                                                                                    | C_ushii_00120_mRNA_50.1   | -                   | -                    |
| GF0034927 | 0                      | 1                | 0                 | Hypothetical protein (1)                                                          |                                                                                                                                                                                                                                                                                                                   |                                                                                                                                                                                                                                                                                                                                                                                                                                                                              | C_ushii_00120_mRNA_5.1    | -                   | -                    |
| GF0034926 | 0                      | 1                | 0                 | Hypothetical protein (1)                                                          |                                                                                                                                                                                                                                                                                                                   |                                                                                                                                                                                                                                                                                                                                                                                                                                                                              | C_ushii_00120_mRNA_48.1   | -                   | -                    |
| GF0034925 | 0                      | 1                | 0                 | Hypothetical protein (1)                                                          | heme binding [GO:0020037 molecular_function] (1); iron ion binding [GO:0005506 molecular_function] (1); oxidation-reduction process [GO:005114 biological_process] (1); oxidoreductase activity, acting on paired donors, with incorporation or reduction of molecular oxygen [GO:0016765 molecular_function] (1) | Cytochrome P450 [IPR001128] (1); Protein kinase-like domain [IPR01009] (1)                                                                                                                                                                                                                                                                                                                                                                                                   | C_ushii_00120_mRNA_46.1   | -                   | -                    |
| GF0034924 | 0                      | 1                | 0                 | Cytochrome P450 (1)                                                               | iron ion binding [GO:0005506 molecular_function] (1); heme binding [GO:0020037 molecular_function] (1); oxidoreductase activity, acting on paired donors, with incorporation or reduction of molecular oxygen [GO:0016765 molecular_function] (1); oxidation-reduction process [GO:005114 biological_process] (1) | Cytochrome P450 [IPR001128] (1); Reverse transcriptase zinc-binding domain [IPR026960] (1); Cytochrome P450, E-class, group 1 [IPR002401] (1)                                                                                                                                                                                                                                                                                                                                | C_ushii_00120_mRNA_44.1   | -                   | -                    |
| GF0034923 | 0                      | 1                | 0                 | Hypothetical protein (1)                                                          |                                                                                                                                                                                                                                                                                                                   |                                                                                                                                                                                                                                                                                                                                                                                                                                                                              | C_ushii_00120_mRNA_3.1    | -                   | -                    |
| GF0034922 | 0                      | 1                | 0                 | Hypothetical protein (1)                                                          | structural constituent of ribosome [GO:0003735 molecular_function] (1); large ribosomal subunit [GO:0015934 cellular_component] (1); translation [GO:0006412 biological_process] (1); intracellular [GO:0005622 cellular_component] (1); ribosome [GO:0005840 cellular_component] (1)                             | Ribosomal protein L16c L19 [IPR01131] (1); Ribosomal protein L15, conserved site [IPR001196] (1); Ribosomal protein L15 [IPR030878] (1)                                                                                                                                                                                                                                                                                                                                      | C_ushii_00120_mRNA_16.1   | -                   | -                    |
| GF0034921 | 0                      | 1                | 0                 | 60S ribosomal protein L27a (1)                                                    |                                                                                                                                                                                                                                                                                                                   |                                                                                                                                                                                                                                                                                                                                                                                                                                                                              | C_ushii_00120_mRNA_1.1    | -                   | -                    |
| GF0034920 | 0                      | 1                | 0                 | Transcription factor MYB86 (1)                                                    | DNA binding [GO:0003677 molecular_function] (1)                                                                                                                                                                                                                                                                   | SANT/Myb domain [IPR001085] (1); Homeobox-like [IPR009057] (1); Myb domain [IPR017930] (1)                                                                                                                                                                                                                                                                                                                                                                                   | C_ushii_00120_mRNA_12.1   | -                   | -                    |
| GF0034919 | 0                      | 1                | 0                 | Hypothetical protein (1)                                                          |                                                                                                                                                                                                                                                                                                                   |                                                                                                                                                                                                                                                                                                                                                                                                                                                                              | C_ushii_00119_mRNA_40.1   | -                   | -                    |



| ID        | Num. in <i>C. crottensteiae</i> | Num. in <i>C. auris</i> | Num. in <i>P. putida</i> | Note                                                 | GO                                                                                                                                                                                                                                                                                                                | InterPro                                                                                                                                                                                                                                                                                        | Members in <i>C. crottensteiae</i> | Members in <i>C. auris</i> | Members in <i>P. putida</i> |
|-----------|---------------------------------|-------------------------|--------------------------|------------------------------------------------------|-------------------------------------------------------------------------------------------------------------------------------------------------------------------------------------------------------------------------------------------------------------------------------------------------------------------|-------------------------------------------------------------------------------------------------------------------------------------------------------------------------------------------------------------------------------------------------------------------------------------------------|------------------------------------|----------------------------|-----------------------------|
| GF0034918 | 0                               | 1                       | 0                        | BED zinc finger/JAZ family dimerization domain (1)   | protein dimerization activity [GO:0046983 molecular_function] (1); nucleic acid binding [GO:0003676 molecular_function] (1)                                                                                                                                                                                       | HAT, C-terminal dimerization domain [IPRO08906] (1); Ribonuclease H-like domain [IPRO12537] (1)                                                                                                                                                                                                 | -                                  | C_ushii_00119_mRNA_37.1    | -                           |
| GF0034917 | 0                               | 1                       | 0                        | Hypothetical protein (1)                             | -                                                                                                                                                                                                                                                                                                                 | -                                                                                                                                                                                                                                                                                               | -                                  | C_ushii_00119_mRNA_31.1    | -                           |
| GF0034916 | 0                               | 1                       | 0                        | Walk-associated receptor kinase 2 (1)                | polysaccharide binding [GO:0030247 molecular_function] (1)                                                                                                                                                                                                                                                        | Walk-associated receptor kinase, galactonon-binding domain [IPRO25287] (1)                                                                                                                                                                                                                      | -                                  | C_ushii_00119_mRNA_21.1    | -                           |
| GF0034915 | 0                               | 1                       | 0                        | MATE efflux family protein 1 (1)                     | transmembrane transport [GO:0055085 biological_process] (1); drug transmembrane transport [GO:0006855 biological_process] (1); membrane [GO:0016020 cellular_component] (1); drug transmembrane transporter activity [GO:0015238 molecular_function] (1); antiporter activity [GO:0015297 molecular_function] (1) | Multi antimicrobial extrusion protein [IPRO02528] (1)                                                                                                                                                                                                                                           | -                                  | C_ushii_00119_mRNA_17.1    | -                           |
| GF0034914 | 0                               | 1                       | 0                        | Hypothetical protein (1)                             | regulation of transcription, DNA-templated [GO:0006355 biological_process] (1); DNA binding [GO:0003677 molecular_function] (1)                                                                                                                                                                                   | NAC domain [IPRO03441] (1)                                                                                                                                                                                                                                                                      | -                                  | C_ushii_00119_mRNA_15.1    | -                           |
| GF0034913 | 0                               | 1                       | 0                        | NAC domain-containing protein 67 (1)                 | DNA binding [GO:0003677 molecular_function] (1); regulation of transcription, DNA-templated [GO:0006355 biological_process] (1)                                                                                                                                                                                   | NAC domain [IPRO03441] (1)                                                                                                                                                                                                                                                                      | -                                  | C_ushii_00119_mRNA_14.1    | -                           |
| GF0034912 | 0                               | 1                       | 0                        | Hypothetical protein (1)                             | -                                                                                                                                                                                                                                                                                                                 | -                                                                                                                                                                                                                                                                                               | -                                  | C_ushii_00119_mRNA_13.1    | -                           |
| GF0034911 | 0                               | 1                       | 0                        | Hypothetical protein (1)                             | -                                                                                                                                                                                                                                                                                                                 | -                                                                                                                                                                                                                                                                                               | -                                  | C_ushii_00118_mRNA_9.1     | -                           |
| GF0034910 | 0                               | 1                       | 0                        | Hypothetical protein (1)                             | -                                                                                                                                                                                                                                                                                                                 | -                                                                                                                                                                                                                                                                                               | -                                  | C_ushii_00118_mRNA_70.1    | -                           |
| GF0034909 | 0                               | 1                       | 0                        | Hypothetical protein (1)                             | aspartic-type endopeptidase activity [GO:0004190 molecular_function] (1); proteolysis [GO:0006508 biological_process] (1)                                                                                                                                                                                         | Peptidase ACA, retrovirus, catalytic [IPRO01995] (1); Retripepsin [IPRO18061] (1); Aspartic peptidase domain [IPRO21109] (1)                                                                                                                                                                    | -                                  | C_ushii_00118_mRNA_7.1     | -                           |
| GF0034908 | 0                               | 1                       | 0                        | Hypothetical protein (1)                             | -                                                                                                                                                                                                                                                                                                                 | -                                                                                                                                                                                                                                                                                               | -                                  | C_ushii_00118_mRNA_6.1     | -                           |
| GF0034907 | 0                               | 1                       | 0                        | Hypothetical protein (1)                             | -                                                                                                                                                                                                                                                                                                                 | -                                                                                                                                                                                                                                                                                               | -                                  | C_ushii_00118_mRNA_53.1    | -                           |
| GF0034906 | 0                               | 1                       | 0                        | Hypothetical protein (1)                             | -                                                                                                                                                                                                                                                                                                                 | Reverse transcriptase domain [IPRO04877] (1)                                                                                                                                                                                                                                                    | -                                  | C_ushii_00118_mRNA_47.1    | -                           |
| GF0034905 | 0                               | 1                       | 0                        | Hypothetical protein (1)                             | -                                                                                                                                                                                                                                                                                                                 | -                                                                                                                                                                                                                                                                                               | -                                  | C_ushii_00118_mRNA_36.1    | -                           |
| GF0034904 | 0                               | 1                       | 0                        | Hypothetical protein (1)                             | -                                                                                                                                                                                                                                                                                                                 | -                                                                                                                                                                                                                                                                                               | -                                  | C_ushii_00118_mRNA_35.1    | -                           |
| GF0034903 | 0                               | 1                       | 0                        | Hypothetical protein (1)                             | nucleic acid binding [GO:0003676 molecular_function] (1); proteolysis [GO:0006508 biological_process] (1); zinc ion binding [GO:0008270 molecular_function] (1); aspartic-type endopeptidase activity [GO:0004190 molecular_function] (1)                                                                         | Zinc finger, CCHC-type [IPRO01878] (1); Peptidase ACA, retrovirus, catalytic [IPRO01995] (1)                                                                                                                                                                                                    | -                                  | C_ushii_00118_mRNA_30.1    | -                           |
| GF0034902 | 0                               | 1                       | 0                        | Hypothetical protein (1)                             | -                                                                                                                                                                                                                                                                                                                 | -                                                                                                                                                                                                                                                                                               | -                                  | C_ushii_00118_mRNA_14.1    | -                           |
| GF0034901 | 0                               | 1                       | 0                        | Hypothetical protein (1)                             | -                                                                                                                                                                                                                                                                                                                 | -                                                                                                                                                                                                                                                                                               | -                                  | C_ushii_00118_mRNA_13.1    | -                           |
| GF0034900 | 0                               | 1                       | 0                        | Hypothetical protein (1)                             | -                                                                                                                                                                                                                                                                                                                 | -                                                                                                                                                                                                                                                                                               | -                                  | C_ushii_00118_mRNA_10.1    | -                           |
| GF0034899 | 0                               | 1                       | 0                        | Hypothetical protein (1)                             | -                                                                                                                                                                                                                                                                                                                 | -                                                                                                                                                                                                                                                                                               | -                                  | C_ushii_00117_mRNA_77.1    | -                           |
| GF0034898 | 0                               | 1                       | 0                        | Hypothetical protein (1)                             | -                                                                                                                                                                                                                                                                                                                 | -                                                                                                                                                                                                                                                                                               | -                                  | C_ushii_00117_mRNA_76.1    | -                           |
| GF0034897 | 0                               | 1                       | 0                        | MATE efflux family protein 4, chlorotetracycline (1) | transmembrane transport [GO:0055085 biological_process] (1); drug transmembrane transport [GO:0006855 biological_process] (1); antiporter activity [GO:0015238 molecular_function] (1); antiporter activity [GO:0015297 molecular_function] (1); membrane [GO:0016020 cellular_component] (1)                     | Multi antimicrobial extrusion protein [IPRO02528] (1)                                                                                                                                                                                                                                           | -                                  | C_ushii_00117_mRNA_74.1    | -                           |
| GF0034896 | 0                               | 1                       | 0                        | Hypothetical protein (1)                             | -                                                                                                                                                                                                                                                                                                                 | Domain of unknown function DUF1985 [IPRO15410] (1)                                                                                                                                                                                                                                              | -                                  | C_ushii_00117_mRNA_71.1    | -                           |
| GF0034895 | 0                               | 1                       | 0                        | Hypothetical protein (1)                             | -                                                                                                                                                                                                                                                                                                                 | -                                                                                                                                                                                                                                                                                               | -                                  | C_ushii_00117_mRNA_47.1    | -                           |
| GF0034894 | 0                               | 1                       | 0                        | Hypothetical protein (1)                             | -                                                                                                                                                                                                                                                                                                                 | -                                                                                                                                                                                                                                                                                               | -                                  | C_ushii_00117_mRNA_46.1    | -                           |
| GF0034893 | 0                               | 1                       | 0                        | Hypothetical protein (1)                             | transferase activity, transferring hexosyl groups [GO:0016758 molecular_function] (1); metabolic process [GO:0008152 biological_process] (1)                                                                                                                                                                      | Reverse transcriptase zinc-binding domain [IPRO26960] (1); UDP-glucuronosyl-UDP-glucosyltransferase [IPRO02215] (1)                                                                                                                                                                             | -                                  | C_ushii_00117_mRNA_41.1    | -                           |
| GF0034892 | 0                               | 1                       | 0                        | Hypothetical protein (1)                             | -                                                                                                                                                                                                                                                                                                                 | Peptidase S8, subtilisin-related [IPRO15500] (1)                                                                                                                                                                                                                                                | -                                  | C_ushii_00117_mRNA_40.1    | -                           |
| GF0034891 | 0                               | 1                       | 0                        | Hypothetical protein (1)                             | integral component of membrane [GO:0016021 cellular_component] (1); copper ion transmembrane transport [GO:0005534 biological_process] (1); copper ion transmembrane transporter activity [GO:0005375 molecular_function] (1)                                                                                     | Ctr copper transporter [IPRO07274] (1)                                                                                                                                                                                                                                                          | -                                  | C_ushii_00117_mRNA_23.1    | -                           |
| GF0034890 | 0                               | 1                       | 0                        | Hypothetical protein (1)                             | -                                                                                                                                                                                                                                                                                                                 | -                                                                                                                                                                                                                                                                                               | -                                  | C_ushii_00117_mRNA_21.1    | -                           |
| GF0034889 | 0                               | 1                       | 0                        | Hypothetical protein (1)                             | -                                                                                                                                                                                                                                                                                                                 | -                                                                                                                                                                                                                                                                                               | -                                  | C_ushii_00117_mRNA_20.1    | -                           |
| GF0034888 | 0                               | 1                       | 0                        | Pathogenesis-related maize seed protein (1)          | extracellular region [GO:0005576 cellular_component] (1)                                                                                                                                                                                                                                                          | Ves allergen [IPRO02413] (1); Allergen V5/Typ-1-related, conserved site [IPRO12441] (1); Cysteine-rich secretory protein, allergen V5/typ-1-related [IPRO12813] (1); CAP domain [IPRO14044] (1)                                                                                                 | -                                  | C_ushii_00116_mRNA_7.1     | -                           |
| GF0034887 | 0                               | 1                       | 0                        | Hypothetical protein (1)                             | -                                                                                                                                                                                                                                                                                                                 | -                                                                                                                                                                                                                                                                                               | -                                  | C_ushii_00116_mRNA_60.1    | -                           |
| GF0034886 | 0                               | 1                       | 0                        | LOB domain-containing protein 1 (1)                  | -                                                                                                                                                                                                                                                                                                                 | Lateral organ boundaries, LOB [IPRO04883] (1)                                                                                                                                                                                                                                                   | -                                  | C_ushii_00116_mRNA_3.1     | -                           |
| GF0034885 | 0                               | 1                       | 0                        | Hypothetical protein (1)                             | -                                                                                                                                                                                                                                                                                                                 | -                                                                                                                                                                                                                                                                                               | -                                  | C_ushii_00116_mRNA_27.1    | -                           |
| GF0034884 | 0                               | 1                       | 0                        | DNA-directed RNA polymerase (1)                      | DNA binding [GO:0003677 molecular_function] (1); nucleus [GO:0005634 cellular_component] (1); DNA-directed RNA polymerase activity [GO:0000389 molecular_function] (1); transcription, DNA-templated [GO:0006355 biological_process] (1); zinc ion binding [GO:0008270 molecular_function] (1)                    | RNA polymerase Rpb1, domain 5 [IPRO07801] (1); DNA-directed RNA pol I, large subunit [IPRO15699] (1)                                                                                                                                                                                            | -                                  | C_ushii_00115_mRNA_55.1    | -                           |
| GF0034883 | 0                               | 1                       | 0                        | Hypothetical protein (1)                             | -                                                                                                                                                                                                                                                                                                                 | -                                                                                                                                                                                                                                                                                               | -                                  | C_ushii_00115_mRNA_45.1    | -                           |
| GF0034882 | 0                               | 1                       | 0                        | Chaperone protein dual 6(1)                          | -                                                                                                                                                                                                                                                                                                                 | Dual domain [IPRO01623] (1)                                                                                                                                                                                                                                                                     | -                                  | C_ushii_00115_mRNA_41.1    | -                           |
| GF0034881 | 0                               | 1                       | 0                        | Hypothetical protein (1)                             | -                                                                                                                                                                                                                                                                                                                 | -                                                                                                                                                                                                                                                                                               | -                                  | C_ushii_00115_mRNA_34.1    | -                           |
| GF0034880 | 0                               | 1                       | 0                        | Hypothetical protein (1)                             | -                                                                                                                                                                                                                                                                                                                 | -                                                                                                                                                                                                                                                                                               | -                                  | C_ushii_00115_mRNA_33.1    | -                           |
| GF0034879 | 0                               | 1                       | 0                        | Hypothetical protein (1)                             | -                                                                                                                                                                                                                                                                                                                 | -                                                                                                                                                                                                                                                                                               | -                                  | C_ushii_00115_mRNA_27.1    | -                           |
| GF0034878 | 0                               | 1                       | 0                        | Uroporphyrinogen decarboxylase (1)                   | uroporphyrinogen decarboxylase activity [GO:0004853 molecular_function] (1); porphyrin-containing compound biosynthetic process [GO:0006779 biological_process] (1)                                                                                                                                               | Uroporphyrinogen decarboxylase (URO-D) [IPRO00257] (1)                                                                                                                                                                                                                                          | -                                  | C_ushii_00115_mRNA_1.1     | -                           |
| GF0034877 | 0                               | 1                       | 0                        | Hypothetical protein (1)                             | -                                                                                                                                                                                                                                                                                                                 | -                                                                                                                                                                                                                                                                                               | -                                  | C_ushii_00114_mRNA_9.1     | -                           |
| GF0034876 | 0                               | 1                       | 0                        | Hypothetical protein (1)                             | -                                                                                                                                                                                                                                                                                                                 | -                                                                                                                                                                                                                                                                                               | -                                  | C_ushii_00114_mRNA_7.1     | -                           |
| GF0034875 | 0                               | 1                       | 0                        | Hypothetical protein (1)                             | -                                                                                                                                                                                                                                                                                                                 | Reverse transcriptase zinc-binding domain [IPRO26960] (1)                                                                                                                                                                                                                                       | -                                  | C_ushii_00114_mRNA_45.1    | -                           |
| GF0034874 | 0                               | 1                       | 0                        | Hypothetical protein (1)                             | -                                                                                                                                                                                                                                                                                                                 | -                                                                                                                                                                                                                                                                                               | -                                  | C_ushii_00114_mRNA_39.1    | -                           |
| GF0034873 | 0                               | 1                       | 0                        | Hypothetical protein (1)                             | -                                                                                                                                                                                                                                                                                                                 | -                                                                                                                                                                                                                                                                                               | -                                  | C_ushii_00114_mRNA_35.1    | -                           |
| GF0034872 | 0                               | 1                       | 0                        | Hypothetical protein (1)                             | -                                                                                                                                                                                                                                                                                                                 | -                                                                                                                                                                                                                                                                                               | -                                  | C_ushii_00114_mRNA_11.1    | -                           |
| GF0034871 | 0                               | 1                       | 0                        | Hypothetical protein (1)                             | -                                                                                                                                                                                                                                                                                                                 | -                                                                                                                                                                                                                                                                                               | -                                  | C_ushii_00114_mRNA_1.1     | -                           |
| GF0034870 | 0                               | 1                       | 0                        | Hypothetical protein (1)                             | -                                                                                                                                                                                                                                                                                                                 | -                                                                                                                                                                                                                                                                                               | -                                  | C_ushii_00113_mRNA_9.1     | -                           |
| GF0034869 | 0                               | 1                       | 0                        | Hypothetical protein (1)                             | -                                                                                                                                                                                                                                                                                                                 | -                                                                                                                                                                                                                                                                                               | -                                  | C_ushii_00113_mRNA_7.1     | -                           |
| GF0034868 | 0                               | 1                       | 0                        | Hypothetical protein (1)                             | protein dimerization activity [GO:0046983 molecular_function] (1); nucleic acid binding [GO:0003676 molecular_function] (1)                                                                                                                                                                                       | HAT, C-terminal dimerization domain [IPRO08906] (1); Ribonuclease H-like domain [IPRO12537] (1)                                                                                                                                                                                                 | -                                  | C_ushii_00113_mRNA_6.1     | -                           |
| GF0034867 | 0                               | 1                       | 0                        | Ghcan endo-1,3-beta-glucosidase 8 (1)                | hydrolase activity, hydrolyzing O-glycosyl compounds [GO:0004553 molecular_function] (1); carbohydrate metabolic process [GO:0008975 biological_process] (1)                                                                                                                                                      | M8 domain [IPRO12546] (1); Glycoside hydrolase, catalytic domain [IPRO13781] (1); Glycoside hydrolase superfamily 17 [IPRO00490] (1)                                                                                                                                                            | -                                  | C_ushii_00113_mRNA_52.1    | -                           |
| GF0034866 | 0                               | 1                       | 0                        | Hypothetical protein (1)                             | protein binding [GO:0005515 molecular_function] (1)                                                                                                                                                                                                                                                               | C2 domain [IPRO00008] (1)                                                                                                                                                                                                                                                                       | -                                  | C_ushii_00113_mRNA_44.1    | -                           |
| GF0034865 | 0                               | 1                       | 0                        | Aukyrin repeat family protein (1)                    | protein binding [GO:0005515 molecular_function] (1)                                                                                                                                                                                                                                                               | Aukyrin repeat-containing domain [IPRO20683] (1); PGD domain [IPRO20961] (1); Aukyrin repeat [IPRO02110] (1)                                                                                                                                                                                    | -                                  | C_ushii_00113_mRNA_42.1    | -                           |
| GF0034864 | 0                               | 1                       | 0                        | Aukyrin repeat family protein (1)                    | protein binding [GO:0005515 molecular_function] (1)                                                                                                                                                                                                                                                               | Aukyrin repeat-containing domain [IPRO20683] (1); Aukyrin repeat [IPRO02110] (1)                                                                                                                                                                                                                | -                                  | C_ushii_00113_mRNA_36.1    | -                           |
| GF0034863 | 0                               | 1                       | 0                        | Glutamate dehydrogenase (1)                          | oxidoreductase activity [GO:0016491 molecular_function] (1); oxidation-reduction process [GO:0055114 biological_process] (1); cellular amino acid metabolic process [GO:0006520 biological_process] (1)                                                                                                           | Glutamate (phenylalanine/leucine/valine) dehydrogenase, C-terminal [IPRO06090] (1); NAD(P)+ binding domain [IPRO10440] (1); Glutamate (phenylalanine/leucine/valine) dehydrogenase, dimerization domain [IPRO06091] (1); Glutamate (phenylalanine/leucine/valine) dehydrogenase [IPRO06095] (1) | -                                  | C_ushii_00113_mRNA_34.1    | -                           |
| GF0034862 | 0                               | 1                       | 0                        | Hypothetical protein (1)                             | -                                                                                                                                                                                                                                                                                                                 | -                                                                                                                                                                                                                                                                                               | -                                  | C_ushii_00113_mRNA_21.1    | -                           |
| GF0034861 | 0                               | 1                       | 0                        | Hypothetical protein (1)                             | -                                                                                                                                                                                                                                                                                                                 | -                                                                                                                                                                                                                                                                                               | -                                  | C_ushii_00113_mRNA_10.1    | -                           |
| GF0034860 | 0                               | 1                       | 0                        | Hypothetical protein (1)                             | zinc ion binding [GO:0008270 molecular_function] (1)                                                                                                                                                                                                                                                              | Zinc finger, SWIM-type [IPRO07527] (1); Zinc finger, PMZ-type [IPRO05641] (1)                                                                                                                                                                                                                   | -                                  | C_ushii_00113_mRNA_1.1     | -                           |
| GF0034859 | 0                               | 1                       | 0                        | Leguminosin group-486 secreted peptide (1)           | -                                                                                                                                                                                                                                                                                                                 | Plant self-incompatibility S1 [IPRO10264] (1)                                                                                                                                                                                                                                                   | -                                  | C_ushii_00112_mRNA_52.1    | -                           |
| GF0034858 | 0                               | 1                       | 0                        | Hypothetical protein (1)                             | -                                                                                                                                                                                                                                                                                                                 | NB-ARC [IPRO02182] (1); P-loop containing nucleoside triphosphate hydrolase [IPRO27417] (1); DDX8K domain-containing protein [IPRO19133] (1); Winged helix-turn-helix DNA-binding domain [IPRO15911] (1)                                                                                        | -                                  | C_ushii_00112_mRNA_47.1    | -                           |
| GF0034857 | 0                               | 1                       | 0                        | Disease resistance protein (1)                       | ADP binding [GO:0042531 molecular_function] (1)                                                                                                                                                                                                                                                                   | -                                                                                                                                                                                                                                                                                               | -                                  | C_ushii_00112_mRNA_46.1    | -                           |
| GF0034856 | 0                               | 1                       | 0                        | Hypothetical protein (1)                             | protein binding [GO:0005515 molecular_function] (1)                                                                                                                                                                                                                                                               | F-box domain [IPRO18109] (1)                                                                                                                                                                                                                                                                    | -                                  | C_ushii_00112_mRNA_23.1    | -                           |
| GF0034855 | 0                               | 1                       | 0                        | Hypothetical protein (1)                             | -                                                                                                                                                                                                                                                                                                                 | -                                                                                                                                                                                                                                                                                               | -                                  | C_ushii_00112_mRNA_22.1    | -                           |
| GF0034854 | 0                               | 1                       | 0                        | Hemospetin (1)                                       | -                                                                                                                                                                                                                                                                                                                 | -                                                                                                                                                                                                                                                                                               | -                                  | C_ushii_00112_mRNA_20.1    | -                           |
| GF0034853 | 0                               | 1                       | 0                        | Aukyrin repeat family protein, putative (1)          | protein binding [GO:0005515 molecular_function] (1)                                                                                                                                                                                                                                                               | Aukyrin repeat-containing domain [IPRO20683] (1); PGD domain [IPRO20961] (1); Aukyrin repeat [IPRO02110] (1)                                                                                                                                                                                    | -                                  | C_ushii_00112_mRNA_19.1    | -                           |

| ID        | Num. in C. crottensteae | Num in C. audita | Num in P. trifidata | Note                                                    | GO                                                                                                                                                                                                                                                                                                                                                                                                                                                                                                                                                 | InterPro                                                                                                                                                                                                                                                                                      | Members in C. crottensteae | Members in C. audita     | Members in P. trifidata |
|-----------|-------------------------|------------------|---------------------|---------------------------------------------------------|----------------------------------------------------------------------------------------------------------------------------------------------------------------------------------------------------------------------------------------------------------------------------------------------------------------------------------------------------------------------------------------------------------------------------------------------------------------------------------------------------------------------------------------------------|-----------------------------------------------------------------------------------------------------------------------------------------------------------------------------------------------------------------------------------------------------------------------------------------------|----------------------------|--------------------------|-------------------------|
| GF0034852 | 0                       | 1                | 0                   | Ankyrin repeat family protein, putative (1)             | protein binding [GO:0005515 molecular_function] (1)                                                                                                                                                                                                                                                                                                                                                                                                                                                                                                | Ankyrin repeat [IPR012110] (1); Ankyrin repeat-containing domain [IPR020683] (1)                                                                                                                                                                                                              | -                          | C_umshii_00112_mRNA_17.1 | -                       |
| GF0034851 | 0                       | 1                | 0                   | Hypothetical protein (1)                                | protein binding [GO:0005515 molecular_function] (1)                                                                                                                                                                                                                                                                                                                                                                                                                                                                                                | F-box domain [IPR001810] (1)                                                                                                                                                                                                                                                                  | -                          | C_umshii_00112_mRNA_14.1 | -                       |
| GF0034850 | 0                       | 1                | 0                   | Hypothetical protein (1)                                | protein binding [GO:0005515 molecular_function] (1)                                                                                                                                                                                                                                                                                                                                                                                                                                                                                                | F-box domain [IPR001810] (1)                                                                                                                                                                                                                                                                  | -                          | C_umshii_00112_mRNA_13.1 | -                       |
| GF0034849 | 0                       | 1                | 0                   | Hypothetical protein (1)                                | -                                                                                                                                                                                                                                                                                                                                                                                                                                                                                                                                                  | GAG-pro-integrase domain [IPR025724] (1); Gag polypeptide of LTR copia-type [IPR029712] (1)                                                                                                                                                                                                   | -                          | C_umshii_00112_mRNA_12.1 | -                       |
| GF0034848 | 0                       | 1                | 0                   | Ankyrin repeat family protein, putative (1)             | protein binding [GO:0005515 molecular_function] (1)                                                                                                                                                                                                                                                                                                                                                                                                                                                                                                | PGI domain [IPR026961] (1); Ankyrin repeat-containing domain [IPR020683] (1); Ankyrin repeat [IPR021110] (1)                                                                                                                                                                                  | -                          | C_umshii_00112_mRNA_11.1 | -                       |
| GF0034847 | 0                       | 1                | 0                   | Hypothetical protein (1)                                | -                                                                                                                                                                                                                                                                                                                                                                                                                                                                                                                                                  | SCNH hydroxylase-type esterase domain [IPR020683] (1)                                                                                                                                                                                                                                         | -                          | C_umshii_00112_mRNA_1.1  | -                       |
| GF0034846 | 0                       | 1                | 0                   | Hypothetical protein (1)                                | -                                                                                                                                                                                                                                                                                                                                                                                                                                                                                                                                                  | Major facilitator superfamily domain [IPR013830] (1)                                                                                                                                                                                                                                          | -                          | C_umshii_00111_mRNA_6.1  | -                       |
| GF0034845 | 0                       | 1                | 0                   | Hypothetical protein (1)                                | -                                                                                                                                                                                                                                                                                                                                                                                                                                                                                                                                                  | -                                                                                                                                                                                                                                                                                             | -                          | C_umshii_00111_mRNA_4.1  | -                       |
| GF0034844 | 0                       | 1                | 0                   | Putative non-LTR retroelement reverse transcriptase (1) | Reverse transcriptase zinc-binding domain [IPR026960] (1); Reverse transcriptase domain [IPR000477] (1)                                                                                                                                                                                                                                                                                                                                                                                                                                            | -                                                                                                                                                                                                                                                                                             | -                          | C_umshii_00111_mRNA_24.1 | -                       |
| GF0034843 | 0                       | 1                | 0                   | Hypothetical protein (1)                                | -                                                                                                                                                                                                                                                                                                                                                                                                                                                                                                                                                  | -                                                                                                                                                                                                                                                                                             | -                          | C_umshii_00111_mRNA_16.1 | -                       |
| GF0034842 | 0                       | 1                | 0                   | Hypothetical protein (1)                                | -                                                                                                                                                                                                                                                                                                                                                                                                                                                                                                                                                  | -                                                                                                                                                                                                                                                                                             | -                          | C_umshii_00110_mRNA_54.1 | -                       |
| GF0034841 | 0                       | 1                | 0                   | Peptide transporters PTR5 (1)                           | transporter activity [GO:0005215 molecular_function] (1); transport [GO:0006510 biological_process] (1); membrane [GO:0016020 cellular_component] (1)                                                                                                                                                                                                                                                                                                                                                                                              | Proton-dependent oligopeptide transporter family [IPR001091] (1); Major facilitator superfamily domain [IPR020640] (1)                                                                                                                                                                        | -                          | C_umshii_00110_mRNA_45.1 | -                       |
| GF0034840 | 0                       | 1                | 0                   | Hypothetical protein (1)                                | -                                                                                                                                                                                                                                                                                                                                                                                                                                                                                                                                                  | -                                                                                                                                                                                                                                                                                             | -                          | C_umshii_00110_mRNA_40.1 | -                       |
| GF0034839 | 0                       | 1                | 0                   | Thioredoxin peroxidase 1 (1)                            | oxidoreductase activity [GO:0016491 molecular_function] (1)                                                                                                                                                                                                                                                                                                                                                                                                                                                                                        | Thioredoxin-like fold [IPR012336] (1); Redoxin [IPR013740] (1)                                                                                                                                                                                                                                | -                          | C_umshii_00110_mRNA_39.1 | -                       |
| GF0034838 | 0                       | 1                | 0                   | Senescence-related gene 1 (1)                           | -                                                                                                                                                                                                                                                                                                                                                                                                                                                                                                                                                  | isopenicillin N synthase-like [IPR027443] (1); Non-haem dioxygenase N-terminal domain [IPR020992] (1); isopenicillin N synthase-like [IPR027443] (1)                                                                                                                                          | -                          | C_umshii_00110_mRNA_37.1 | -                       |
| GF0034837 | 0                       | 1                | 0                   | Senescence-related gene 1 (1)                           | -                                                                                                                                                                                                                                                                                                                                                                                                                                                                                                                                                  | -                                                                                                                                                                                                                                                                                             | -                          | C_umshii_00110_mRNA_35.1 | -                       |
| GF0034836 | 0                       | 1                | 0                   | Hypothetical protein (1)                                | -                                                                                                                                                                                                                                                                                                                                                                                                                                                                                                                                                  | -                                                                                                                                                                                                                                                                                             | -                          | C_umshii_00110_mRNA_3.1  | -                       |
| GF0034835 | 0                       | 1                | 0                   | Hypothetical protein (1)                                | -                                                                                                                                                                                                                                                                                                                                                                                                                                                                                                                                                  | Peritetracycline repeat [IPR020885] (1)                                                                                                                                                                                                                                                       | -                          | C_umshii_00110_mRNA_17.1 | -                       |
| GF0034834 | 0                       | 1                | 0                   | Hypothetical protein (1)                                | -                                                                                                                                                                                                                                                                                                                                                                                                                                                                                                                                                  | -                                                                                                                                                                                                                                                                                             | -                          | C_umshii_00110_mRNA_1.1  | -                       |
| GF0034833 | 0                       | 1                | 0                   | Hypothetical protein (1)                                | -                                                                                                                                                                                                                                                                                                                                                                                                                                                                                                                                                  | -                                                                                                                                                                                                                                                                                             | -                          | C_umshii_00108_mRNA_38.1 | -                       |
| GF0034832 | 0                       | 1                | 0                   | CXE carboxylesterase (1)                                | hydrolase activity [GO:0016787 molecular_function] (1); metabolic process [GO:0009552 biological_process] (1)                                                                                                                                                                                                                                                                                                                                                                                                                                      | Alpha/beta hydrolase fold [IPR029688] (1); Alpha/beta hydrolase fold-3 [IPR013094] (1)                                                                                                                                                                                                        | -                          | C_umshii_00108_mRNA_29.1 | -                       |
| GF0034831 | 0                       | 1                | 0                   | Hypothetical protein (1)                                | nucleic acid binding [GO:0003676 molecular_function] (1)                                                                                                                                                                                                                                                                                                                                                                                                                                                                                           | Ribonuclease H-like domain [IPR012337] (1)                                                                                                                                                                                                                                                    | -                          | C_umshii_00108_mRNA_22.1 | -                       |
| GF0034830 | 0                       | 1                | 0                   | Hypothetical protein (1)                                | -                                                                                                                                                                                                                                                                                                                                                                                                                                                                                                                                                  | -                                                                                                                                                                                                                                                                                             | -                          | C_umshii_00108_mRNA_21.1 | -                       |
| GF0034829 | 0                       | 1                | 0                   | Hypothetical protein (1)                                | polysaccharide binding [GO:0030247 molecular_function] (1); protein-serine/threonine kinase activity [GO:0004674 molecular_function] (1); calcium ion binding [GO:0005509 molecular_function] (1); integral component of membrane [GO:0016021 cellular_component] (1)                                                                                                                                                                                                                                                                              | EGF-like calcium-binding domain [IPR001811] (1); Protein kinase-like domain [IPR011099] (1); EGF-like calcium-binding conserved site [IPR018071] (1); Wall-associated receptor kinase [IPR013695] (1); Wall-associated receptor kinase, glutarathione-binding domain [IPR023297] (1)          | -                          | C_umshii_00108_mRNA_2.1  | -                       |
| GF0034828 | 0                       | 1                | 0                   | Hypothetical protein (1)                                | -                                                                                                                                                                                                                                                                                                                                                                                                                                                                                                                                                  | -                                                                                                                                                                                                                                                                                             | -                          | C_umshii_00107_mRNA_50.1 | -                       |
| GF0034827 | 0                       | 1                | 0                   | Hypothetical protein (1)                                | -                                                                                                                                                                                                                                                                                                                                                                                                                                                                                                                                                  | -                                                                                                                                                                                                                                                                                             | -                          | C_umshii_00107_mRNA_42.1 | -                       |
| GF0034826 | 0                       | 1                | 0                   | Hypothetical protein (1)                                | -                                                                                                                                                                                                                                                                                                                                                                                                                                                                                                                                                  | -                                                                                                                                                                                                                                                                                             | -                          | C_umshii_00107_mRNA_4.1  | -                       |
| GF0034825 | 0                       | 1                | 0                   | Pepsidin/prolyl cis-trans isomerase FKBP2 (1)           | protein binding [GO:0005515 molecular_function] (1); protein folding [GO:0006457 biological_process] (1)                                                                                                                                                                                                                                                                                                                                                                                                                                           | FKBP-type peptidyl-prolyl cis-trans isomerase domain [IPR001179] (1); Tetratricopeptide repeat [IPR019734] (1); Peptidyl-prolyl cis-trans isomerase, FKBP-type [IPR023566] (1); Elongated TPR repeat-containing domain [IPR021411] (1); Tetratricopeptide-like helical domain [IPR011990] (1) | -                          | C_umshii_00107_mRNA_32.1 | -                       |
| GF0034824 | 0                       | 1                | 0                   | Hypothetical protein (1)                                | -                                                                                                                                                                                                                                                                                                                                                                                                                                                                                                                                                  | -                                                                                                                                                                                                                                                                                             | -                          | C_umshii_00107_mRNA_31.1 | -                       |
| GF0034823 | 0                       | 1                | 0                   | Hypothetical protein (1)                                | -                                                                                                                                                                                                                                                                                                                                                                                                                                                                                                                                                  | -                                                                                                                                                                                                                                                                                             | -                          | C_umshii_00107_mRNA_3.1  | -                       |
| GF0034822 | 0                       | 1                | 0                   | Hypothetical protein (1)                                | adenosylhomocysteine activity [GO:004813 molecular_function] (1); one-carbon metabolic process [GO:0006730 biological_process] (1)                                                                                                                                                                                                                                                                                                                                                                                                                 | Adenosylhomocysteine [IPR000043] (1); NAD(P) <sup>+</sup> binding domain [IPR016401] (1); S-adenosyl-L-homocysteine hydrolase, NAD binding domain [IPR015878] (1)                                                                                                                             | -                          | C_umshii_00107_mRNA_23.1 | -                       |
| GF0034821 | 0                       | 1                | 0                   | Engelol O-methyltransferase (1)                         | methyltransferase activity [GO:0008168 molecular_function] (1); O-methyltransferase activity [GO:0004171 molecular_function] (1); protein dimerization activity [GO:0046983 molecular_function] (1)                                                                                                                                                                                                                                                                                                                                                | S-adenosyl-L-methionine-dependent methyltransferase [IPR029663] (1); Winged helix-turn-helix DNA-binding domain [IPR019911] (1); O-methyltransferase, family 2 [IPR001077] (1); O-methyltransferase C/MT-type [IPR016401] (1); Plant methyltransferase dimerization [IPR012967] (1)           | -                          | C_umshii_00107_mRNA_20.1 | -                       |
| GF0034820 | 0                       | 1                | 0                   | Ribosomal protein L6 (1)                                | structural constituent of ribosome [GO:0005735 molecular_function] (1); translation [GO:0006412 biological_process] (1); ribosome [GO:0005490 cellular_component] (1); rRNA binding [GO:0019843 molecular_function] (1)                                                                                                                                                                                                                                                                                                                            | Ribosomal protein L6 [IPR000702] (1); Ribosomal protein L6, alpha-beta domain [IPR020401] (1); Ribosomal protein L6, bacterial-type [IPR019906] (1)                                                                                                                                           | -                          | C_umshii_00107_mRNA_19.1 | -                       |
| GF0034819 | 0                       | 1                | 0                   | Hypothetical protein (1)                                | -                                                                                                                                                                                                                                                                                                                                                                                                                                                                                                                                                  | -                                                                                                                                                                                                                                                                                             | -                          | C_umshii_00107_mRNA_14.1 | -                       |
| GF0034818 | 0                       | 1                | 0                   | Hypothetical protein (1)                                | -                                                                                                                                                                                                                                                                                                                                                                                                                                                                                                                                                  | -                                                                                                                                                                                                                                                                                             | -                          | C_umshii_00107_mRNA_13.1 | -                       |
| GF0034817 | 0                       | 1                | 0                   | Hypothetical protein (1)                                | O-methyltransferase activity [GO:0008171 molecular_function] (1); protein dimerization activity [GO:0046983 molecular_function] (1); methyltransferase activity [GO:0008168 molecular_function] (1)                                                                                                                                                                                                                                                                                                                                                | Plant methyltransferase dimerization [IPR012967] (1); O-methyltransferase C/MT-type [IPR016401] (1); Winged helix-turn-helix DNA-binding domain [IPR019911] (1); O-methyltransferase, family 2 [IPR001077] (1); S-adenosyl-L-methionine-dependent methyltransferase [IPR029663] (1)           | -                          | C_umshii_00107_mRNA_10.1 | -                       |
| GF0034816 | 0                       | 1                | 0                   | Hypothetical protein (1)                                | -                                                                                                                                                                                                                                                                                                                                                                                                                                                                                                                                                  | -                                                                                                                                                                                                                                                                                             | -                          | C_umshii_00107_mRNA_1.1  | -                       |
| GF0034815 | 0                       | 1                | 0                   | Hypothetical protein (1)                                | -                                                                                                                                                                                                                                                                                                                                                                                                                                                                                                                                                  | -                                                                                                                                                                                                                                                                                             | -                          | C_umshii_00106_mRNA_6.1  | -                       |
| GF0034814 | 0                       | 1                | 0                   | Hypothetical protein (1)                                | -                                                                                                                                                                                                                                                                                                                                                                                                                                                                                                                                                  | -                                                                                                                                                                                                                                                                                             | -                          | C_umshii_00106_mRNA_39.1 | -                       |
| GF0034813 | 0                       | 1                | 0                   | Cellulose synthase (1)                                  | zinc ion binding [GO:0008270 molecular_function] (1); cellulose synthase [LDP-forming] activity [GO:0019150 molecular_function] (1); membrane [GO:0016020 cellular_component] (1); response to oxidative stress [GO:000679 biological_process] (1); heme binding [GO:0005515 molecular_function] (1); cellulose biosynthetic process [GO:0030244 biological_process] (1)                                                                                                                                                                           | Zinc finger, RING-FYVE/PHD-type [IPR013033] (1); Cellulose synthase, RING-type zinc finger [IPR027934] (1); Cellulose synthase [IPR005150] (1); Zinc finger, RING-type [IPR001841] (1)                                                                                                        | -                          | C_umshii_00106_mRNA_38.1 | -                       |
| GF0034812 | 0                       | 1                | 0                   | LysM type receptor kinase (1)                           | LysM domain [IPR018192] (1); Concavalin A-like lectin/glycanase domain [IPR013201] (1); Protein kinase-like domain [IPR011099] (1)                                                                                                                                                                                                                                                                                                                                                                                                                 | -                                                                                                                                                                                                                                                                                             | -                          | C_umshii_00106_mRNA_31.1 | -                       |
| GF0034811 | 0                       | 1                | 0                   | Hypothetical protein (1)                                | -                                                                                                                                                                                                                                                                                                                                                                                                                                                                                                                                                  | -                                                                                                                                                                                                                                                                                             | -                          | C_umshii_00106_mRNA_28.1 | -                       |
| GF0034810 | 0                       | 1                | 0                   | Hypothetical protein (1)                                | -                                                                                                                                                                                                                                                                                                                                                                                                                                                                                                                                                  | -                                                                                                                                                                                                                                                                                             | -                          | C_umshii_00106_mRNA_26.1 | -                       |
| GF0034809 | 0                       | 1                | 0                   | Hypothetical protein (1)                                | -                                                                                                                                                                                                                                                                                                                                                                                                                                                                                                                                                  | Transposon, Eu Spm-like [IPR004242] (1)                                                                                                                                                                                                                                                       | -                          | C_umshii_00106_mRNA_23.1 | -                       |
| GF0034808 | 0                       | 1                | 0                   | Hypothetical protein (1)                                | -                                                                                                                                                                                                                                                                                                                                                                                                                                                                                                                                                  | -                                                                                                                                                                                                                                                                                             | -                          | C_umshii_00106_mRNA_22.1 | -                       |
| GF0034807 | 0                       | 1                | 0                   | Hypothetical protein (1)                                | -                                                                                                                                                                                                                                                                                                                                                                                                                                                                                                                                                  | -                                                                                                                                                                                                                                                                                             | -                          | C_umshii_00106_mRNA_18.1 | -                       |
| GF0034806 | 0                       | 1                | 0                   | Hypothetical protein (1)                                | -                                                                                                                                                                                                                                                                                                                                                                                                                                                                                                                                                  | -                                                                                                                                                                                                                                                                                             | -                          | C_umshii_00106_mRNA_13.1 | -                       |
| GF0034805 | 0                       | 1                | 0                   | Hypothetical protein (1)                                | -                                                                                                                                                                                                                                                                                                                                                                                                                                                                                                                                                  | -                                                                                                                                                                                                                                                                                             | -                          | C_umshii_00106_mRNA_11.1 | -                       |
| GF0034804 | 0                       | 1                | 0                   | Hypothetical protein (1)                                | peroxidase activity [GO:0004601 molecular_function] (1); nucleic acid binding [GO:0003676 molecular_function] (1); oxidation-reduction process [GO:0005514 biological_process] (1); response to oxidative stress [GO:000679 biological_process] (1); heme binding [GO:0005515 molecular_function] (1); oxidation-reduction process [GO:0005514 biological_process] (1); peroxidase activity [GO:0004601 molecular_function] (1); heme binding [GO:0005515 molecular_function] (1); response to oxidative stress [GO:000679 biological_process] (1) | Haem peroxidase [IPR010255] (1); Ribonuclease H-like domain [IPR012337] (1); Peroxidase haem-ligand binding site [IPR019793] (1); Plant peroxidase [IPR000823] (1); Haem peroxidase, plant/fungal/bacterial [IPR020101] (1)                                                                   | -                          | C_umshii_00105_mRNA_5.1  | -                       |
| GF0034803 | 0                       | 1                | 0                   | Hypothetical protein (1)                                | -                                                                                                                                                                                                                                                                                                                                                                                                                                                                                                                                                  | -                                                                                                                                                                                                                                                                                             | -                          | C_umshii_00105_mRNA_4.1  | -                       |
| GF0034802 | 0                       | 1                | 0                   | Hypothetical protein (1)                                | -                                                                                                                                                                                                                                                                                                                                                                                                                                                                                                                                                  | -                                                                                                                                                                                                                                                                                             | -                          | C_umshii_00105_mRNA_23.1 | -                       |
| GF0034801 | 0                       | 1                | 0                   | Hypothetical protein (1)                                | -                                                                                                                                                                                                                                                                                                                                                                                                                                                                                                                                                  | -                                                                                                                                                                                                                                                                                             | -                          | C_umshii_00104_mRNA_9.1  | -                       |
| GF0034800 | 0                       | 1                | 0                   | Hypothetical protein (1)                                | -                                                                                                                                                                                                                                                                                                                                                                                                                                                                                                                                                  | -                                                                                                                                                                                                                                                                                             | -                          | C_umshii_00104_mRNA_6.1  | -                       |
| GF0034799 | 0                       | 1                | 0                   | Hypothetical protein (1)                                | -                                                                                                                                                                                                                                                                                                                                                                                                                                                                                                                                                  | -                                                                                                                                                                                                                                                                                             | -                          | C_umshii_00104_mRNA_52.1 | -                       |
| GF0034798 | 0                       | 1                | 0                   | Putative auxin efflux carrier component 6 (1)           | integral component of membrane [GO:0016021 cellular_component] (1); transmembrane transport [GO:0005885 biological_process] (1)                                                                                                                                                                                                                                                                                                                                                                                                                    | Auxin efflux carrier [IPR004776] (1)                                                                                                                                                                                                                                                          | -                          | C_umshii_00104_mRNA_50.1 | -                       |
| GF0034797 | 0                       | 1                | 0                   | Hypothetical protein (1)                                | -                                                                                                                                                                                                                                                                                                                                                                                                                                                                                                                                                  | -                                                                                                                                                                                                                                                                                             | -                          | C_umshii_00104_mRNA_5.1  | -                       |
| GF0034796 | 0                       | 1                | 0                   | SET and MYND domain-containing (1)                      | -                                                                                                                                                                                                                                                                                                                                                                                                                                                                                                                                                  | -                                                                                                                                                                                                                                                                                             | -                          | C_umshii_00104_mRNA_49.1 | -                       |
| GF0034795 | 0                       | 1                | 0                   | Hypothetical protein (1)                                | -                                                                                                                                                                                                                                                                                                                                                                                                                                                                                                                                                  | Gag-polypeptide of LTR copia-type [IPR029472] (1)                                                                                                                                                                                                                                             | -                          | C_umshii_00104_mRNA_48.1 | -                       |
| GF0034794 | 0                       | 1                | 0                   | Hypothetical protein (1)                                | -                                                                                                                                                                                                                                                                                                                                                                                                                                                                                                                                                  | -                                                                                                                                                                                                                                                                                             | -                          | C_umshii_00104_mRNA_47.1 | -                       |
| GF0034793 | 0                       | 1                | 0                   | Hypothetical protein (1)                                | -                                                                                                                                                                                                                                                                                                                                                                                                                                                                                                                                                  | -                                                                                                                                                                                                                                                                                             | -                          | C_umshii_00104_mRNA_45.1 | -                       |
| GF0034792 | 0                       | 1                | 0                   | Hypothetical protein (1)                                | -                                                                                                                                                                                                                                                                                                                                                                                                                                                                                                                                                  | -                                                                                                                                                                                                                                                                                             | -                          | C_umshii_00104_mRNA_42.1 | -                       |
| GF0034791 | 0                       | 1                | 0                   | Hypothetical protein (1)                                | -                                                                                                                                                                                                                                                                                                                                                                                                                                                                                                                                                  | -                                                                                                                                                                                                                                                                                             | -                          | C_umshii_00104_mRNA_40.1 | -                       |
| GF0034790 | 0                       | 1                | 0                   | Hypothetical protein (1)                                | -                                                                                                                                                                                                                                                                                                                                                                                                                                                                                                                                                  | -                                                                                                                                                                                                                                                                                             | -                          | C_umshii_00104_mRNA_4.1  | -                       |
| GF0034789 | 0                       | 1                | 0                   | Hypothetical protein (1)                                | serpin-type endopeptidase activity [GO:0004190 molecular_function] (1); proteolysis [GO:0006508 biological_process] (1)                                                                                                                                                                                                                                                                                                                                                                                                                            | Aspartic peptidase domain [IPR021109] (1); Aspartic peptidase, active site [IPR019601] (1)                                                                                                                                                                                                    | -                          | C_umshii_00104_mRNA_32.1 | -                       |
| GF0034788 | 0                       | 1                | 0                   | Hypothetical protein (1)                                | -                                                                                                                                                                                                                                                                                                                                                                                                                                                                                                                                                  | Reverse transcriptase domain [IPR000477] (1)                                                                                                                                                                                                                                                  | -                          | C_umshii_00104_mRNA_29.1 | -                       |
| GF0034787 | 0                       | 1                | 0                   | Hypothetical protein (1)                                | -                                                                                                                                                                                                                                                                                                                                                                                                                                                                                                                                                  | -                                                                                                                                                                                                                                                                                             | -                          | C_umshii_00104_mRNA_27.1 | -                       |
| GF0034786 | 0                       | 1                | 0                   | Hypothetical protein (1)                                | -                                                                                                                                                                                                                                                                                                                                                                                                                                                                                                                                                  | -                                                                                                                                                                                                                                                                                             | -                          | C_umshii_00104_mRNA_26.1 | -                       |
| GF0034785 | 0                       | 1                | 0                   | Hypothetical protein (1)                                | zinc ion binding [GO:0008270 molecular_function] (1); nucleic acid binding [GO:0003676 molecular_function] (1)                                                                                                                                                                                                                                                                                                                                                                                                                                     | Zinc finger, C2H2-type [IPR001878] (1)                                                                                                                                                                                                                                                        | -                          | C_umshii_00104_mRNA_22.1 | -                       |

| ID        | Num. in C. croftensis | Num. in C. canalis | Num. in P. putillata | Note                                                           | GO                                                                                                                                                                                                                                                                                                                | InterPro                                                                                                                                                                                                                                                         | Members in C. croftensis | Members in C. canalis  | Members in P. putillata |
|-----------|-----------------------|--------------------|----------------------|----------------------------------------------------------------|-------------------------------------------------------------------------------------------------------------------------------------------------------------------------------------------------------------------------------------------------------------------------------------------------------------------|------------------------------------------------------------------------------------------------------------------------------------------------------------------------------------------------------------------------------------------------------------------|--------------------------|------------------------|-------------------------|
| GF0034784 | 0                     | 1                  | 0                    | Hypothetical protein (1)                                       |                                                                                                                                                                                                                                                                                                                   |                                                                                                                                                                                                                                                                  | -                        | C_ushii_00104_mRNA_211 | -                       |
| GF0034783 | 0                     | 1                  | 0                    | Hypothetical protein (1)                                       |                                                                                                                                                                                                                                                                                                                   |                                                                                                                                                                                                                                                                  | -                        | C_ushii_00104_mRNA_201 | -                       |
| GF0034782 | 0                     | 1                  | 0                    | Hypothetical protein (1)                                       |                                                                                                                                                                                                                                                                                                                   |                                                                                                                                                                                                                                                                  | -                        | C_ushii_00104_mRNA_191 | -                       |
| GF0034781 | 0                     | 1                  | 0                    | Hypothetical protein (1)                                       |                                                                                                                                                                                                                                                                                                                   |                                                                                                                                                                                                                                                                  | -                        | C_ushii_00104_mRNA_181 | -                       |
| GF0034780 | 0                     | 1                  | 0                    | Hypothetical protein (1)                                       |                                                                                                                                                                                                                                                                                                                   |                                                                                                                                                                                                                                                                  | -                        | C_ushii_00104_mRNA_121 | -                       |
| GF0034779 | 0                     | 1                  | 0                    | Hypothetical protein (1)                                       | ATP binding [GO:0005524 molecular_function] (1); protein phosphorylation [GO:0006468 biological_process] (1); protein kinase activity [GO:0004672 molecular_function] (1)                                                                                                                                         | Protein kinase-like domain [IPR011009] (1); Protein kinase domain [IPR000719] (1)                                                                                                                                                                                | -                        | C_ushii_00103_mRNA_81  | -                       |
| GF0034778 | 0                     | 1                  | 0                    | rRNA-binding Musashi (1)                                       | nucleotide binding [GO:0000166 molecular_function] (1); nucleic acid binding [GO:0003676 molecular_function] (1)                                                                                                                                                                                                  | Nucleotide-binding alpha-beta plus domain [IPR020771] (1); RNA recognition motif domain [IPR000504] (1)                                                                                                                                                          | -                        | C_ushii_00103_mRNA_761 | -                       |
| GF0034777 | 0                     | 1                  | 0                    | Hypothetical protein (1)                                       |                                                                                                                                                                                                                                                                                                                   |                                                                                                                                                                                                                                                                  | -                        | C_ushii_00103_mRNA_51  | -                       |
| GF0034776 | 0                     | 1                  | 0                    | Hypothetical protein (1)                                       |                                                                                                                                                                                                                                                                                                                   |                                                                                                                                                                                                                                                                  | -                        | C_ushii_00103_mRNA_461 | -                       |
| GF0034775 | 0                     | 1                  | 0                    | Hypothetical protein (1)                                       |                                                                                                                                                                                                                                                                                                                   |                                                                                                                                                                                                                                                                  | -                        | C_ushii_00103_mRNA_431 | -                       |
| GF0034774 | 0                     | 1                  | 0                    | Hypothetical protein (1)                                       |                                                                                                                                                                                                                                                                                                                   |                                                                                                                                                                                                                                                                  | -                        | C_ushii_00103_mRNA_381 | -                       |
| GF0034773 | 0                     | 1                  | 0                    | Hypothetical protein (1)                                       |                                                                                                                                                                                                                                                                                                                   | Retromer/pag domain [IPR005162] (1)                                                                                                                                                                                                                              | -                        | C_ushii_00103_mRNA_371 | -                       |
| GF0034772 | 0                     | 1                  | 0                    | CDNA clone:013021P22, full insert sequence (1)                 |                                                                                                                                                                                                                                                                                                                   |                                                                                                                                                                                                                                                                  | -                        | C_ushii_00103_mRNA_281 | -                       |
| GF0034771 | 0                     | 1                  | 0                    | Hypothetical protein (1)                                       |                                                                                                                                                                                                                                                                                                                   |                                                                                                                                                                                                                                                                  | -                        | C_ushii_00103_mRNA_251 | -                       |
| GF0034770 | 0                     | 1                  | 0                    | Hypothetical protein (1)                                       |                                                                                                                                                                                                                                                                                                                   | Glucose/vitaminol dehydrogenase [IPR002347] (1); NAD(P)+binding domain [IPR016640] (1)                                                                                                                                                                           | -                        | C_ushii_00102_mRNA_81  | -                       |
| GF0034769 | 0                     | 1                  | 0                    | Hypothetical protein (1)                                       |                                                                                                                                                                                                                                                                                                                   |                                                                                                                                                                                                                                                                  | -                        | C_ushii_00102_mRNA_611 | -                       |
| GF0034768 | 0                     | 1                  | 0                    | Flavinoid P-monoxygenase (1)                                   | oxidoreductase activity, acting on paired donors, with incorporation or reduction of molecular oxygen [GO:0016765 molecular_function] (1); oxidation-reduction process [GO:005114 biological_process] (1); heme binding [GO:0020617 molecular_function] (1); zinc ion binding [GO:0005506 molecular_function] (1) | Cytochrome P450 [IPR001128] (1); Cytochrome P450, conserved site [IPR017972] (1); Cytochrome P450, E-class, group I [IPR016401] (1)                                                                                                                              | -                        | C_ushii_00102_mRNA_601 | -                       |
| GF0034767 | 0                     | 1                  | 0                    | Hypothetical protein (1)                                       |                                                                                                                                                                                                                                                                                                                   |                                                                                                                                                                                                                                                                  | -                        | C_ushii_00102_mRNA_581 | -                       |
| GF0034766 | 0                     | 1                  | 0                    | Hypothetical protein (1)                                       |                                                                                                                                                                                                                                                                                                                   |                                                                                                                                                                                                                                                                  | -                        | C_ushii_00102_mRNA_551 | -                       |
| GF0034765 | 0                     | 1                  | 0                    | Hypothetical protein (1)                                       |                                                                                                                                                                                                                                                                                                                   |                                                                                                                                                                                                                                                                  | -                        | C_ushii_00102_mRNA_531 | -                       |
| GF0034764 | 0                     | 1                  | 0                    | Hypothetical protein (1)                                       | protein binding [GO:0005515 biological_process] (1); recognition of polypeptide [GO:048544 biological_process] (1)                                                                                                                                                                                                | S-box glycoprotein domain [IPR000858] (1); EGF-like domain [IPR000752] (1)                                                                                                                                                                                       | -                        | C_ushii_00102_mRNA_521 | -                       |
| GF0034763 | 0                     | 1                  | 0                    | Hypothetical protein (1)                                       |                                                                                                                                                                                                                                                                                                                   | Bull-type lectin domain [IPR001480] (1)                                                                                                                                                                                                                          | -                        | C_ushii_00102_mRNA_511 | -                       |
| GF0034762 | 0                     | 1                  | 0                    | Hypothetical protein (1)                                       |                                                                                                                                                                                                                                                                                                                   |                                                                                                                                                                                                                                                                  | -                        | C_ushii_00102_mRNA_451 | -                       |
| GF0034761 | 0                     | 1                  | 0                    | Hypothetical protein (1)                                       |                                                                                                                                                                                                                                                                                                                   |                                                                                                                                                                                                                                                                  | -                        | C_ushii_00102_mRNA_441 | -                       |
| GF0034760 | 0                     | 1                  | 0                    | Hypothetical protein (1)                                       |                                                                                                                                                                                                                                                                                                                   |                                                                                                                                                                                                                                                                  | -                        | C_ushii_00102_mRNA_391 | -                       |
| GF0034759 | 0                     | 1                  | 0                    | Hypothetical protein (1)                                       |                                                                                                                                                                                                                                                                                                                   |                                                                                                                                                                                                                                                                  | -                        | C_ushii_00102_mRNA_351 | -                       |
| GF0034758 | 0                     | 1                  | 0                    | Hypothetical protein (1)                                       |                                                                                                                                                                                                                                                                                                                   |                                                                                                                                                                                                                                                                  | -                        | C_ushii_00102_mRNA_341 | -                       |
| GF0034757 | 0                     | 1                  | 0                    | Hypothetical protein (1)                                       |                                                                                                                                                                                                                                                                                                                   | Retromer/pag domain [IPR005162] (1)                                                                                                                                                                                                                              | -                        | C_ushii_00102_mRNA_321 | -                       |
| GF0034756 | 0                     | 1                  | 0                    | Hypothetical protein (1)                                       |                                                                                                                                                                                                                                                                                                                   |                                                                                                                                                                                                                                                                  | -                        | C_ushii_00102_mRNA_261 | -                       |
| GF0034755 | 0                     | 1                  | 0                    | Hypothetical protein (1)                                       | oxidation-reduction process [GO:005114 biological_process] (1); oxidoreductase activity [GO:0016491 molecular_function] (1)                                                                                                                                                                                       | NADP-dependent oxidoreductase domain [IPR021210] (1); Alko-keto reductase, conserved site [IPR018170] (1); Alko-keto reductase [IPR020471] (1); Reverse transcriptase domain [IPR000477] (1); Alko-keto reductase/potassium channel subunit beta [IPR001395] (1) | -                        | C_ushii_00102_mRNA_241 | -                       |
| GF0034754 | 0                     | 1                  | 0                    | Hypothetical protein (1)                                       |                                                                                                                                                                                                                                                                                                                   |                                                                                                                                                                                                                                                                  | -                        | C_ushii_00102_mRNA_221 | -                       |
| GF0034753 | 0                     | 1                  | 0                    | Alko-keto reductase family 4 member C9 (1)                     | oxidation-reduction process [GO:005114 biological_process] (1); oxidoreductase activity [GO:0016491 molecular_function] (1)                                                                                                                                                                                       | NADP-dependent oxidoreductase domain [IPR021210] (1); Alko-keto reductase, conserved site [IPR018170] (1); Alko-keto reductase [IPR020471] (1); Alko-keto reductase/potassium channel subunit beta [IPR001395] (1)                                               | -                        | C_ushii_00102_mRNA_201 | -                       |
| GF0034752 | 0                     | 1                  | 0                    | Mannose-1-phosphate guanylyltransferase alpha-like protein (1) | biosynthetic process [GO:0009058 biological_process] (1); nucleosyltransferase activity [GO:0016779 molecular_function] (1)                                                                                                                                                                                       | Trimeric LysA-like [IPR001404] (1); Helicoplex repeat [IPR014511] (1)                                                                                                                                                                                            | -                        | C_ushii_00102_mRNA_171 | -                       |
| GF0034751 | 0                     | 1                  | 0                    | Mannose-1-phosphate guanylyltransferase (1)                    | biosynthetic process [GO:0009058 biological_process] (1); nucleosyltransferase activity [GO:0016779 molecular_function] (1)                                                                                                                                                                                       | Nucleosyl transferase domain [IPR005835] (1); Nucleotide-diphosphate sugar transferases [IPR029044] (1)                                                                                                                                                          | -                        | C_ushii_00102_mRNA_161 | -                       |
| GF0034750 | 0                     | 1                  | 0                    | Hypothetical protein (1)                                       |                                                                                                                                                                                                                                                                                                                   |                                                                                                                                                                                                                                                                  | -                        | C_ushii_00102_mRNA_11  | -                       |
| GF0034749 | 0                     | 1                  | 0                    | Hypothetical protein (1)                                       |                                                                                                                                                                                                                                                                                                                   |                                                                                                                                                                                                                                                                  | -                        | C_ushii_00101_mRNA_81  | -                       |
| GF0034748 | 0                     | 1                  | 0                    | Transposable element protein, putative, (1)                    |                                                                                                                                                                                                                                                                                                                   | Retromer/pag domain [IPR005162] (1)                                                                                                                                                                                                                              | -                        | C_ushii_00101_mRNA_541 | -                       |
| GF0034747 | 0                     | 1                  | 0                    | Putative non-LTR reverse transcriptase (1)                     |                                                                                                                                                                                                                                                                                                                   | Reverse transcriptase zinc-binding domain [IPR006601] (1)                                                                                                                                                                                                        | -                        | C_ushii_00101_mRNA_521 | -                       |
| GF0034746 | 0                     | 1                  | 0                    | Hypothetical protein (1)                                       |                                                                                                                                                                                                                                                                                                                   | Aspartic peptidase domain [IPR021109] (1)                                                                                                                                                                                                                        | -                        | C_ushii_00101_mRNA_451 | -                       |
| GF0034745 | 0                     | 1                  | 0                    | Hypothetical protein (1)                                       |                                                                                                                                                                                                                                                                                                                   |                                                                                                                                                                                                                                                                  | -                        | C_ushii_00101_mRNA_41  | -                       |
| GF0034744 | 0                     | 1                  | 0                    | Hypothetical protein (1)                                       |                                                                                                                                                                                                                                                                                                                   |                                                                                                                                                                                                                                                                  | -                        | C_ushii_00101_mRNA_31  | -                       |
| GF0034743 | 0                     | 1                  | 0                    | Hypothetical protein (1)                                       |                                                                                                                                                                                                                                                                                                                   | Domain of unknown function DUF3700 [IPR024286] (1)                                                                                                                                                                                                               | -                        | C_ushii_00101_mRNA_191 | -                       |
| GF0034742 | 0                     | 1                  | 0                    | Triosephosphate isomerase, cytosolic (1)                       | catalytic activity [GO:0003824 molecular_function] (1); metabolic process [GO:0008152 biological_process] (1); triose-phosphate isomerase activity [GO:0004807 molecular_function] (1)                                                                                                                            | Triosephosphate isomerase [IPR000652] (1); Aldolase-type TIM barrel [IPR013785] (1)                                                                                                                                                                              | -                        | C_ushii_00101_mRNA_121 | -                       |
| GF0034741 | 0                     | 1                  | 0                    | Hypothetical protein (1)                                       |                                                                                                                                                                                                                                                                                                                   |                                                                                                                                                                                                                                                                  | -                        | C_ushii_00101_mRNA_111 | -                       |
| GF0034740 | 0                     | 1                  | 0                    | Hypothetical protein (1)                                       |                                                                                                                                                                                                                                                                                                                   |                                                                                                                                                                                                                                                                  | -                        | C_ushii_00100_mRNA_91  | -                       |
| GF0034739 | 0                     | 1                  | 0                    | Hypothetical protein (1)                                       |                                                                                                                                                                                                                                                                                                                   |                                                                                                                                                                                                                                                                  | -                        | C_ushii_00100_mRNA_571 | -                       |
| GF0034738 | 0                     | 1                  | 0                    | Hypothetical protein (1)                                       |                                                                                                                                                                                                                                                                                                                   |                                                                                                                                                                                                                                                                  | -                        | C_ushii_00100_mRNA_561 | -                       |
| GF0034737 | 0                     | 1                  | 0                    | Hypothetical protein (1)                                       |                                                                                                                                                                                                                                                                                                                   |                                                                                                                                                                                                                                                                  | -                        | C_ushii_00100_mRNA_551 | -                       |
| GF0034736 | 0                     | 1                  | 0                    | Hypothetical protein (1)                                       |                                                                                                                                                                                                                                                                                                                   |                                                                                                                                                                                                                                                                  | -                        | C_ushii_00100_mRNA_531 | -                       |
| GF0034735 | 0                     | 1                  | 0                    | Hypothetical protein (1)                                       |                                                                                                                                                                                                                                                                                                                   |                                                                                                                                                                                                                                                                  | -                        | C_ushii_00100_mRNA_491 | -                       |
| GF0034734 | 0                     | 1                  | 0                    | Hypothetical protein (1)                                       | serine-type endopeptidase activity [GO:0004252 molecular_function] (1); proteolysis [GO:0006508 biological_process] (1)                                                                                                                                                                                           | Peptidase S8/S53 domain [IPR000209] (1)                                                                                                                                                                                                                          | -                        | C_ushii_00100_mRNA_291 | -                       |
| GF0034733 | 0                     | 1                  | 0                    | Hypothetical protein (1)                                       |                                                                                                                                                                                                                                                                                                                   | Peptidase S8, subtilisin-related [IPR015500] (1)                                                                                                                                                                                                                 | -                        | C_ushii_00100_mRNA_271 | -                       |
| GF0034732 | 0                     | 1                  | 0                    | TLP domain class transcription factor (1)                      | protein binding [GO:0005515 molecular_function] (1)                                                                                                                                                                                                                                                               | Tabby, C-terminal, conserved site [IPR018066] (1); T-box domain [IPR001810] (1); Tabby C-terminal-like domain [IPR026859] (1); Tabby, C-terminal [IPR000907] (1)                                                                                                 | -                        | C_ushii_00100_mRNA_241 | -                       |
| GF0034731 | 0                     | 1                  | 0                    | Hypothetical protein (1)                                       |                                                                                                                                                                                                                                                                                                                   |                                                                                                                                                                                                                                                                  | -                        | C_ushii_00100_mRNA_181 | -                       |
| GF0034730 | 0                     | 1                  | 0                    | Zinc finger protein 830 (1)                                    |                                                                                                                                                                                                                                                                                                                   |                                                                                                                                                                                                                                                                  | -                        | C_ushii_00099_mRNA_531 | -                       |
| GF0034729 | 0                     | 1                  | 0                    | Hypothetical protein (1)                                       |                                                                                                                                                                                                                                                                                                                   |                                                                                                                                                                                                                                                                  | -                        | C_ushii_00099_mRNA_501 | -                       |
| GF0034728 | 0                     | 1                  | 0                    | Hypothetical protein (1)                                       |                                                                                                                                                                                                                                                                                                                   |                                                                                                                                                                                                                                                                  | -                        | C_ushii_00099_mRNA_471 | -                       |
| GF0034727 | 0                     | 1                  | 0                    | Disease resistance protein RPS2 (1)                            | protein binding [GO:0005515 molecular_function] (1); ADP binding [GO:0043511 molecular_function] (1)                                                                                                                                                                                                              | Leucine-rich repeat domain, I domain-like [IPR023075] (1); Leucine-rich repeat, typical subtype [IPR003593] (1); Leucine-rich repeat [IPR001611] (1); NB-ARC [IPR021821] (1)                                                                                     | -                        | C_ushii_00099_mRNA_451 | -                       |
| GF0034726 | 0                     | 1                  | 0                    | NBS-LRR type disease resistance protein (1)                    | ADP binding [GO:0043511 molecular_function] (1)                                                                                                                                                                                                                                                                   | P-loop containing nucleoside triphosphate hydrolase [IPR027417] (1); AAA+ ATPase domain [IPR003593] (1); NB-ARC [IPR021821] (1)                                                                                                                                  | -                        | C_ushii_00099_mRNA_441 | -                       |
| GF0034725 | 0                     | 1                  | 0                    | Hypothetical protein (1)                                       | transferase activity, transferring acyl groups other than amino-acyl groups [GO:0010147 molecular_function] (1)                                                                                                                                                                                                   | Chloramphenicol acetyltransferase-like domain [IPR023213] (1); Transferase [IPR004901] (1)                                                                                                                                                                       | -                        | C_ushii_00099_mRNA_401 | -                       |
| GF0034724 | 0                     | 1                  | 0                    | Hypothetical protein (1)                                       | nucleic acid binding [GO:0003676 molecular_function] (1); zinc ion binding [GO:0008270 molecular_function] (1)                                                                                                                                                                                                    | Zinc finger, C2HC-type [IPR001878] (1); Reverse transcriptase, RNA-dependent DNA polymerase [IPR013103] (1)                                                                                                                                                      | -                        | C_ushii_00099_mRNA_361 | -                       |
| GF0034723 | 0                     | 1                  | 0                    | Hypothetical protein (1)                                       |                                                                                                                                                                                                                                                                                                                   |                                                                                                                                                                                                                                                                  | -                        | C_ushii_00099_mRNA_341 | -                       |
| GF0034722 | 0                     | 1                  | 0                    | Hypothetical protein (1)                                       |                                                                                                                                                                                                                                                                                                                   |                                                                                                                                                                                                                                                                  | -                        | C_ushii_00099_mRNA_321 | -                       |
| GF0034721 | 0                     | 1                  | 0                    | Aspartic proteinase nepenthacin-2 (1)                          | proteolysis [GO:0006508 biological_process] (1); aspartic-type endopeptidase activity [GO:0004190 molecular_function] (1)                                                                                                                                                                                         | Aspartic peptidase A1 family [IPR001461] (1); Xylanase inhibitor, C-terminal [IPR022799] (1); Peptidase family A1 domain [IPR001211] (1); Aspartic peptidase domain [IPR021109] (1)                                                                              | -                        | C_ushii_00099_mRNA_311 | -                       |
| GF0034720 | 0                     | 1                  | 0                    | Lysine histidine transporter 1 (1)                             |                                                                                                                                                                                                                                                                                                                   | Amino acid transporter, transmembrane domain [IPR013057] (1)                                                                                                                                                                                                     | -                        | C_ushii_00099_mRNA_161 | -                       |
| GF0034719 | 0                     | 1                  | 0                    | Hypothetical protein (1)                                       |                                                                                                                                                                                                                                                                                                                   |                                                                                                                                                                                                                                                                  | -                        | C_ushii_00099_mRNA_121 | -                       |
| GF0034718 | 0                     | 1                  | 0                    | Hypothetical protein (1)                                       |                                                                                                                                                                                                                                                                                                                   |                                                                                                                                                                                                                                                                  | -                        | C_ushii_00098_mRNA_91  | -                       |
| GF0034717 | 0                     | 1                  | 0                    | Hypothetical protein (1)                                       |                                                                                                                                                                                                                                                                                                                   |                                                                                                                                                                                                                                                                  | -                        | C_ushii_00098_mRNA_81  | -                       |
| GF0034716 | 0                     | 1                  | 0                    | Hypothetical protein (1)                                       |                                                                                                                                                                                                                                                                                                                   |                                                                                                                                                                                                                                                                  | -                        | C_ushii_00098_mRNA_71  | -                       |
| GF0034715 | 0                     | 1                  | 0                    | Hypothetical protein (1)                                       |                                                                                                                                                                                                                                                                                                                   | P-loop containing nucleoside triphosphate hydrolase [IPR027417] (1)                                                                                                                                                                                              | -                        | C_ushii_00098_mRNA_611 | -                       |
| GF0034714 | 0                     | 1                  | 0                    | UMP-CMP kinase 3 (1)                                           | ATP binding [GO:0005524 molecular_function] (1); nucleobase-containing compound metabolic process [GO:0006139 biological_process] (1); nucleobase-containing compound kinase activity [GO:0010206 molecular_function] (1)                                                                                         | Adenylyl kinase-UMP-CMP kinase [IPR000850] (1); P-loop containing nucleoside triphosphate hydrolase [IPR027417] (1)                                                                                                                                              | -                        | C_ushii_00098_mRNA_601 | -                       |
| GF0034713 | 0                     | 1                  | 0                    | Hypothetical protein (1)                                       |                                                                                                                                                                                                                                                                                                                   |                                                                                                                                                                                                                                                                  | -                        | C_ushii_00098_mRNA_61  | -                       |
| GF0034712 | 0                     | 1                  | 0                    | Hypothetical protein (1)                                       |                                                                                                                                                                                                                                                                                                                   |                                                                                                                                                                                                                                                                  | -                        | C_ushii_00098_mRNA_591 | -                       |
| GF0034711 | 0                     | 1                  | 0                    | Hypothetical protein (1)                                       |                                                                                                                                                                                                                                                                                                                   |                                                                                                                                                                                                                                                                  | -                        | C_ushii_00098_mRNA_51  | -                       |
| GF0034710 | 0                     | 1                  | 0                    | Hypothetical protein (1)                                       |                                                                                                                                                                                                                                                                                                                   |                                                                                                                                                                                                                                                                  | -                        | C_ushii_00098_mRNA_41  | -                       |
| GF0034709 | 0                     | 1                  | 0                    | Hypothetical protein (1)                                       |                                                                                                                                                                                                                                                                                                                   | Lun4 N-terminal [IPR025609] (1); LSM domain [IPR010920] (1)                                                                                                                                                                                                      | -                        | C_ushii_00098_mRNA_311 | -                       |
| GF0034708 | 0                     | 1                  | 0                    | Hypothetical protein (1)                                       | DNA binding [GO:0003477 molecular_function] (1)                                                                                                                                                                                                                                                                   | Zinc finger, BED-type [IPR003656] (1)                                                                                                                                                                                                                            | -                        | C_ushii_00098_mRNA_21  | -                       |
| GF0034707 | 0                     | 1                  | 0                    | Hypothetical protein (1)                                       |                                                                                                                                                                                                                                                                                                                   |                                                                                                                                                                                                                                                                  | -                        | C_ushii_00098_mRNA_201 | -                       |
| GF0034706 | 0                     | 1                  | 0                    | Hypothetical protein (1)                                       |                                                                                                                                                                                                                                                                                                                   |                                                                                                                                                                                                                                                                  | -                        | C_ushii_00098_mRNA_171 | -                       |

| ID        | Num. in C. crottenstei | Num. in C. auris | Num. in P. putida | Note                                                              | GO                                                                                                                                                                                                                                                                                                                                                                                                         | InterPro                                                                                                                                                                                                                                                                                                                                                                                    | Members in C. crottenstei | Members in C. auris    | Members in P. putida |
|-----------|------------------------|------------------|-------------------|-------------------------------------------------------------------|------------------------------------------------------------------------------------------------------------------------------------------------------------------------------------------------------------------------------------------------------------------------------------------------------------------------------------------------------------------------------------------------------------|---------------------------------------------------------------------------------------------------------------------------------------------------------------------------------------------------------------------------------------------------------------------------------------------------------------------------------------------------------------------------------------------|---------------------------|------------------------|----------------------|
| GF0034705 | 0                      | 1                | 0                 | Hypothetical protein (1)                                          |                                                                                                                                                                                                                                                                                                                                                                                                            |                                                                                                                                                                                                                                                                                                                                                                                             | -                         | C_uni97_0097_mRNA_8.1  | -                    |
| GF0034704 | 0                      | 1                | 0                 | Hypothetical protein (1)                                          |                                                                                                                                                                                                                                                                                                                                                                                                            |                                                                                                                                                                                                                                                                                                                                                                                             | -                         | C_uni97_0097_mRNA_A.1  | -                    |
| GF0034703 | 0                      | 1                | 0                 | Hypothetical protein (1)                                          |                                                                                                                                                                                                                                                                                                                                                                                                            |                                                                                                                                                                                                                                                                                                                                                                                             | -                         | C_uni97_0097_mRNA_5.1  | -                    |
| GF0034702 | 0                      | 1                | 0                 | Hypothetical protein (1)                                          |                                                                                                                                                                                                                                                                                                                                                                                                            |                                                                                                                                                                                                                                                                                                                                                                                             | -                         | C_uni97_0097_mRNA_49.1 | -                    |
| GF0034701 | 0                      | 1                | 0                 | Hypothetical protein (1)                                          |                                                                                                                                                                                                                                                                                                                                                                                                            | Retrotransposon gag domain [IPR001624] (4)                                                                                                                                                                                                                                                                                                                                                  | -                         | C_uni97_0097_mRNA_48.1 | -                    |
| GF0034700 | 0                      | 1                | 0                 | Hypothetical protein (1)                                          |                                                                                                                                                                                                                                                                                                                                                                                                            |                                                                                                                                                                                                                                                                                                                                                                                             | -                         | C_uni97_0097_mRNA_40.1 | -                    |
| GF0034699 | 0                      | 1                | 0                 | Cytosolic membrane protein (1)                                    |                                                                                                                                                                                                                                                                                                                                                                                                            | Domain of unknown function DUF2062 [IPR018639] (4)                                                                                                                                                                                                                                                                                                                                          | -                         | C_uni97_0097_mRNA_4.2  | -                    |
| GF0034698 | 0                      | 1                | 0                 | Calcium ion binding protein, putative (1)                         | calcium ion binding [GO:005559 molecular_function] (1)                                                                                                                                                                                                                                                                                                                                                     | EF-hand domain pair [IPR011922] (1); EF-Hand 1, calcium-binding site [IPR018247] (1); EF-hand domain [IPR020481] (1)                                                                                                                                                                                                                                                                        | -                         | C_uni97_0097_mRNA_39.1 | -                    |
| GF0034697 | 0                      | 1                | 0                 | Hypothetical protein (1)                                          | nucleic acid binding [GO:0003676 molecular_function] (1); zinc ion binding [GO:000870 molecular_function] (1)                                                                                                                                                                                                                                                                                              | Zinc finger, CCHC-type [IPR011878] (4)                                                                                                                                                                                                                                                                                                                                                      | -                         | C_uni97_0097_mRNA_35.1 | -                    |
| GF0034696 | 0                      | 1                | 0                 | Hypothetical protein (1)                                          |                                                                                                                                                                                                                                                                                                                                                                                                            |                                                                                                                                                                                                                                                                                                                                                                                             | -                         | C_uni97_0097_mRNA_34.1 | -                    |
| GF0034695 | 0                      | 1                | 0                 | Calcium ion binding protein, putative (1)                         | calcium ion binding [GO:005559 molecular_function] (1)                                                                                                                                                                                                                                                                                                                                                     | EF-hand domain pair [IPR011922] (1); EF-Hand 1, calcium-binding site [IPR018247] (1); EF-hand domain [IPR020481] (1)                                                                                                                                                                                                                                                                        | -                         | C_uni97_0097_mRNA_33.1 | -                    |
| GF0034694 | 0                      | 1                | 0                 | Putative Glycophosphoryl diester phosphodiesterase (1)            | phosphoric diester hydrolase activity [GO:000881 molecular_function] (1); lipid metabolic process [GO:0006629 biological_process] (1); glycerophosphodiester phosphodiesterase activity [GO:0006889 molecular_function] (1)                                                                                                                                                                                | Glycerophosphoryl diester phosphodiesterase [IPR004129] (1); Glycophospholipase phosphodiesterase domain [IPR010395] (1); PLC-like phosphodiesterase, TM beta/alpha-barrel domain [IPR017946] (1)                                                                                                                                                                                           | -                         | C_uni97_0097_mRNA_3.1  | -                    |
| GF0034693 | 0                      | 1                | 0                 | MUTE (1)                                                          | protein dimerization activity [GO:0046983 molecular_function] (1)                                                                                                                                                                                                                                                                                                                                          | Muc-type, basic helix-loop-helix (BHLH) domain [IPR011598] (1)                                                                                                                                                                                                                                                                                                                              | -                         | C_uni97_0097_mRNA_15.1 | -                    |
| GF0034692 | 0                      | 1                | 0                 | Basic 7S globulin (1)                                             | proteolysis [GO:0006508 biological_process] (1); aspartic-type endopeptidase activity [GO:0004190 molecular_function] (1)                                                                                                                                                                                                                                                                                  | Aspartic peptidase domain [IPR021109] (1); Peptidase family A1 domain [IPR031213] (1); Aspartic peptidase A1 family [IPR010461] (1); Xylanase inhibitor, N-terminal [IPR032861] (1); Xylanase inhibitor, C-terminal [IPR032799] (1)                                                                                                                                                         | -                         | C_uni97_0097_mRNA_11.1 | -                    |
| GF0034691 | 0                      | 1                | 0                 | Phosphatidate phosphatase LPP2 (1)                                |                                                                                                                                                                                                                                                                                                                                                                                                            | HAD-like domain [IPR032141] (1); Lipase/Smc (SuperLipase2) [IPR012899] (1); LNS2/PTTP [IPR031315] (1)                                                                                                                                                                                                                                                                                       | -                         | C_uni97_0096_mRNA_67.1 | -                    |
| GF0034690 | 0                      | 1                | 0                 | ABSCISIC ACID-SENSITIVE 5-like protein 6 (1)                      | transcription factor activity, sequence-specific DNA binding [GO:0003700 molecular_function] (1); regulation of transcription, DNA-dependent [GO:0006355 biological_process] (1); sequence-specific DNA binding [GO:0042565 molecular_function] (1)                                                                                                                                                        | Basic-leucine zipper domain [IPR004827] (1)                                                                                                                                                                                                                                                                                                                                                 | -                         | C_uni97_0096_mRNA_48.1 | -                    |
| GF0034689 | 0                      | 1                | 0                 | Hypothetical protein (1)                                          |                                                                                                                                                                                                                                                                                                                                                                                                            |                                                                                                                                                                                                                                                                                                                                                                                             | -                         | C_uni97_0096_mRNA_45.1 | -                    |
| GF0034688 | 0                      | 1                | 0                 | Leucine-rich repeat protein kinase family protein isoform 3 (1)   |                                                                                                                                                                                                                                                                                                                                                                                                            | Leucine-rich repeat domain, L domain-like [IPR026751] (1)                                                                                                                                                                                                                                                                                                                                   | -                         | C_uni97_0096_mRNA_23.1 | -                    |
| GF0034687 | 0                      | 1                | 0                 | Hypothetical protein (1)                                          |                                                                                                                                                                                                                                                                                                                                                                                                            |                                                                                                                                                                                                                                                                                                                                                                                             | -                         | C_uni97_0096_mRNA_21.1 | -                    |
| GF0034686 | 0                      | 1                | 0                 | C2 domain protein (1)                                             | protein binding [GO:0005515 molecular_function] (1)                                                                                                                                                                                                                                                                                                                                                        | C2 domain [IPR000008] (1)                                                                                                                                                                                                                                                                                                                                                                   | -                         | C_uni97_0096_mRNA_18.1 | -                    |
| GF0034685 | 0                      | 1                | 0                 | Hypothetical protein (1)                                          | protein binding [GO:0005515 molecular_function] (1)                                                                                                                                                                                                                                                                                                                                                        | F-box domain [IPR018101] (1)                                                                                                                                                                                                                                                                                                                                                                | -                         | C_uni97_0096_mRNA_15.1 | -                    |
| GF0034684 | 0                      | 1                | 0                 | Hypothetical protein (1)                                          | catalytic activity [GO:0003624 molecular_function] (1); 4, 8, 9, 4 sulfur cluster binding [GO:0051539 molecular_function] (1); RNA modifier [GO:0009495 biological_process] (1); transferase activity [GO:0003676 molecular_function] (1); iron-sulfur cluster binding [GO:0051536 molecular_function] (1); microtubule modification [GO:0043412 biological_process] (1)                                   | Methyltransferase, conserved site [IPR005211] (1); Methyltransferase [IPR005839] (1); Maf-like RNA modifying enzyme, archaeal-type [IPR004461] (1); Methyltransferase/radical SAM-type protein [IPR022701] (1); Radical SAM, alpha beta horeshell [IPR023404] (1); Elongator protein 3/MafB/tdB [IPR006063] (1); Methyltransferase, N-terminal [IPR013848] (1); Radical SAM [IPR007197] (1) | -                         | C_uni97_0096_mRNA_12.1 | -                    |
| GF0034682 | 0                      | 1                | 0                 | Hypothetical protein (1)                                          | substrate-specific transmembrane transporter activity [GO:0022891 molecular_function] (1); integral component of membrane [GO:0016021 cellular_component] (1); transmembrane transporter activity [GO:0022857 molecular_function] (1); membrane [GO:0016020 cellular_component] (1); transmembrane transport [GO:0055085 biological_process] (1)                                                           | Major facilitator, sugar transporter-like [IPR005828] (1); Sugar/inositol transporter [IPR003663] (1); Major facilitator superfamily domain [IPR020846] (1)                                                                                                                                                                                                                                 | -                         | C_uni97_0095_mRNA_49.1 | -                    |
| GF0034681 | 0                      | 1                | 0                 | Sugar carrier protein C (1)                                       |                                                                                                                                                                                                                                                                                                                                                                                                            |                                                                                                                                                                                                                                                                                                                                                                                             | -                         | C_uni97_0095_mRNA_46.1 | -                    |
| GF0034680 | 0                      | 1                | 0                 | Hypothetical protein (1)                                          | nucleic acid binding [GO:0003676 molecular_function] (1)                                                                                                                                                                                                                                                                                                                                                   | Ribonuclease H-like domain [IPR012337] (1); Domain of unknown function DUF4283 [IPR025558] (1)                                                                                                                                                                                                                                                                                              | -                         | C_uni97_0095_mRNA_46.1 | -                    |
| GF0034679 | 0                      | 1                | 0                 | Hypothetical protein (1)                                          | transmembrane transport [GO:0055085 biological_process] (1); transporter activity [GO:0005215 molecular_function] (1); membrane [GO:0016020 cellular_component] (1); transmembrane transporter activity [GO:0022857 molecular_function] (1); integral component of membrane [GO:0016021 cellular_component] (1); substrate-specific transmembrane transporter activity [GO:0022891 molecular_function] (1) | Sugar transporter, conserved site [IPR005828] (1); Major facilitator superfamily domain [IPR020846] (1); Major facilitator, sugar transporter-like [IPR005828] (1); Sugar/inositol transporter [IPR003663] (1)                                                                                                                                                                              | -                         | C_uni97_0095_mRNA_42.1 | -                    |
| GF0034678 | 0                      | 1                | 0                 | Hypothetical protein (1)                                          |                                                                                                                                                                                                                                                                                                                                                                                                            |                                                                                                                                                                                                                                                                                                                                                                                             | -                         | C_uni97_0095_mRNA_4.1  | -                    |
| GF0034677 | 0                      | 1                | 0                 | Hypothetical protein (1)                                          |                                                                                                                                                                                                                                                                                                                                                                                                            |                                                                                                                                                                                                                                                                                                                                                                                             | -                         | C_uni97_0095_mRNA_3.1  | -                    |
| GF0034676 | 0                      | 1                | 0                 | Hypothetical protein (1)                                          | serine-type endopeptidase inhibitor activity [GO:0004867 molecular_function] (1); response to wounding [GO:0009611 biological_process] (1)                                                                                                                                                                                                                                                                 | Proteinase inhibitor I13, potato inhibitor 1 [IPR000864] (4)                                                                                                                                                                                                                                                                                                                                | -                         | C_uni97_0095_mRNA_29.1 | -                    |
| GF0034675 | 0                      | 1                | 0                 | Hypothetical protein (1)                                          |                                                                                                                                                                                                                                                                                                                                                                                                            |                                                                                                                                                                                                                                                                                                                                                                                             | -                         | C_uni97_0095_mRNA_21.1 | -                    |
| GF0034674 | 0                      | 1                | 0                 | LR receptor like kinase family protein (1)                        | protein binding [GO:0005515 molecular_function] (1); protein phosphorylation [GO:0006068 biological_process] (1); protein kinase activity [GO:0004672 molecular_function] (1); ATP binding [GO:0005524 molecular_function] (1)                                                                                                                                                                             | Protein kinase, ATP binding site [IPR017441] (1); Leucine-rich repeat-containing N-terminal, plant-type [IPR013210] (1); Leucine-rich repeat [IPR010411] (1); Protein kinase domain [IPR007191] (1); Leucine-rich repeat domain, 1 domain-like [IPR032675] (1); Protein kinase-like domain [IPR011009] (1); C/Coatomer/alpha-like lectin/glycanase domain [IPR013320] (1)                   | -                         | C_uni97_0095_mRNA_2.1  | -                    |
| GF0034673 | 0                      | 1                | 0                 | Agmatine N(4)-cosamoyltransferase (1)                             | transferase activity, transferring acyl group other than amino-acyl groups [GO:0016747 molecular_function] (1)                                                                                                                                                                                                                                                                                             | Chkaraethylol acetyltransferase-like domain [IPR025131] (1); Transferase [IPR003480] (1)                                                                                                                                                                                                                                                                                                    | -                         | C_uni97_0095_mRNA_18.1 | -                    |
| GF0034672 | 0                      | 1                | 0                 | Hypothetical protein (1)                                          |                                                                                                                                                                                                                                                                                                                                                                                                            |                                                                                                                                                                                                                                                                                                                                                                                             | -                         | C_uni97_0095_mRNA_14.1 | -                    |
| GF0034671 | 0                      | 1                | 0                 | Hypothetical protein (1)                                          |                                                                                                                                                                                                                                                                                                                                                                                                            |                                                                                                                                                                                                                                                                                                                                                                                             | -                         | C_uni97_0094_mRNA_9.1  | -                    |
| GF0034670 | 0                      | 1                | 0                 | Hypothetical protein (1)                                          |                                                                                                                                                                                                                                                                                                                                                                                                            |                                                                                                                                                                                                                                                                                                                                                                                             | -                         | C_uni97_0094_mRNA_46.1 | -                    |
| GF0034669 | 0                      | 1                | 0                 | 6a-hydroxymuskimin methyltransferase family protein (1)           | methyltransferase activity [GO:0001618 molecular_function] (1); O-methyltransferase activity [GO:0008171 molecular_function] (1)                                                                                                                                                                                                                                                                           | S-adenosyl-4-methionine-dependent methyltransferase [IPR029063] (1); O-methyltransferase, COMT-type [IPR016461] (1); O-methyltransferase, family 2 [IPR001077] (1)                                                                                                                                                                                                                          | -                         | C_uni97_0094_mRNA_39.1 | -                    |
| GF0034668 | 0                      | 1                | 0                 | Hypothetical protein (1)                                          |                                                                                                                                                                                                                                                                                                                                                                                                            |                                                                                                                                                                                                                                                                                                                                                                                             | -                         | C_uni97_0094_mRNA_3.1  | -                    |
| GF0034667 | 0                      | 1                | 0                 | Hypothetical protein (1)                                          |                                                                                                                                                                                                                                                                                                                                                                                                            |                                                                                                                                                                                                                                                                                                                                                                                             | -                         | C_uni97_0094_mRNA_25.1 | -                    |
| GF0034666 | 0                      | 1                | 0                 | Hypothetical protein (1)                                          |                                                                                                                                                                                                                                                                                                                                                                                                            |                                                                                                                                                                                                                                                                                                                                                                                             | -                         | C_uni97_0094_mRNA_10.1 | -                    |
| GF0034665 | 0                      | 1                | 0                 | Cytokinin riboside 5'-monophosphate phosphoribidyltransferase (1) |                                                                                                                                                                                                                                                                                                                                                                                                            | Major coat protein, L-A virus [IPR015921] (1); LOG family [IPR013100] (1)                                                                                                                                                                                                                                                                                                                   | -                         | C_uni97_0093_mRNA_9.1  | -                    |
| GF0034664 | 0                      | 1                | 0                 | Hypothetical protein (1)                                          |                                                                                                                                                                                                                                                                                                                                                                                                            |                                                                                                                                                                                                                                                                                                                                                                                             | -                         | C_uni97_0093_mRNA_7.1  | -                    |
| GF0034663 | 0                      | 1                | 0                 | Hypothetical protein (1)                                          |                                                                                                                                                                                                                                                                                                                                                                                                            |                                                                                                                                                                                                                                                                                                                                                                                             | -                         | C_uni97_0093_mRNA_45.1 | -                    |
| GF0034662 | 0                      | 1                | 0                 | Hypothetical protein (1)                                          |                                                                                                                                                                                                                                                                                                                                                                                                            |                                                                                                                                                                                                                                                                                                                                                                                             | -                         | C_uni97_0093_mRNA_38.1 | -                    |
| GF0034661 | 0                      | 1                | 0                 | Hypothetical protein (1)                                          |                                                                                                                                                                                                                                                                                                                                                                                                            |                                                                                                                                                                                                                                                                                                                                                                                             | -                         | C_uni97_0093_mRNA_34.1 | -                    |
| GF0034660 | 0                      | 1                | 0                 | Hypothetical protein (1)                                          |                                                                                                                                                                                                                                                                                                                                                                                                            | Transposon-associated domain [IPR029480] (4)                                                                                                                                                                                                                                                                                                                                                | -                         | C_uni97_0093_mRNA_27.1 | -                    |
| GF0034659 | 0                      | 1                | 0                 | US small nuclear RNA-associated protein 18 (1)                    | protein binding [GO:0005515 molecular_function] (1)                                                                                                                                                                                                                                                                                                                                                        | WD40 repeat [IPR016801] (1); WD40-repeat-containing domain [IPR017986] (1); WD40/VTR repeat-like-containing domain [IPR019481] (1)                                                                                                                                                                                                                                                          | -                         | C_uni97_0093_mRNA_23.1 | -                    |
| GF0034658 | 0                      | 1                | 0                 | Peroxisomal membrane protein PEX14 (1)                            | protein binding [GO:0005515 molecular_function] (1); peroxisomal membrane [GO:0005778 cellular_component] (1); protein import into peroxisome matrix, docking [GO:0016560 biological_process] (1)                                                                                                                                                                                                          | Peroxisomal membrane protein 14 [IPR025651] (1); Peroxisome membrane anchor protein Pex14p, N-terminal [IPR006785] (1)                                                                                                                                                                                                                                                                      | -                         | C_uni97_0092_mRNA_67.1 | -                    |
| GF0034657 | 0                      | 1                | 0                 | Hypothetical protein (1)                                          | protein phosphorylation [GO:0006468 biological_process] (1); protein kinase activity [GO:0004672 molecular_function] (1)                                                                                                                                                                                                                                                                                   | Protein kinase-like domain [IPR011009] (1); Serine-threonine/tyrosine-protein kinase catalytic domain [IPR012545] (1)                                                                                                                                                                                                                                                                       | -                         | C_uni97_0092_mRNA_62.1 | -                    |
| GF0034656 | 0                      | 1                | 0                 | Hypothetical protein (1)                                          | lipid metabolic process [GO:0006629 biological_process] (1)                                                                                                                                                                                                                                                                                                                                                | Fungal lipase-like domain [IPR029251] (1); Alpha Beta hydrolase fold [IPR029058] (4); Fomrin, F12 domain [IPR015425] (1)                                                                                                                                                                                                                                                                    | -                         | C_uni97_0092_mRNA_13.1 | -                    |
| GF0034655 | 0                      | 1                | 0                 | Triacylglycerol lipase (1)                                        |                                                                                                                                                                                                                                                                                                                                                                                                            |                                                                                                                                                                                                                                                                                                                                                                                             | -                         | C_uni97_0092_mRNA_12.1 | -                    |
| GF0034654 | 0                      | 1                | 0                 | Hypothetical protein (1)                                          |                                                                                                                                                                                                                                                                                                                                                                                                            |                                                                                                                                                                                                                                                                                                                                                                                             | -                         | C_uni97_0091_mRNA_7.1  | -                    |
| GF0034653 | 0                      | 1                | 0                 | Hypothetical protein (1)                                          | protein binding [GO:0005515 molecular_function] (1)                                                                                                                                                                                                                                                                                                                                                        | Leucine-rich repeat [IPR010411] (1); Leucine-rich repeat domain, L domain-like [IPR026751] (1)                                                                                                                                                                                                                                                                                              | -                         | C_uni97_0091_mRNA_50.1 | -                    |
| GF0034652 | 0                      | 1                | 0                 | Polynucleotide transferase, Ribonuclease H 6d (1)                 | nucleic acid binding [GO:0003676 molecular_function] (1)                                                                                                                                                                                                                                                                                                                                                   | Ribonuclease H-like domain [IPR012337] (1); Reverse transcriptase zinc-binding domain [IPR026960] (1)                                                                                                                                                                                                                                                                                       | -                         | C_uni97_0091_mRNA_5.1  | -                    |
| GF0034651 | 0                      | 1                | 0                 | Non-LTR reverse transcriptase (1)                                 |                                                                                                                                                                                                                                                                                                                                                                                                            | Endonuclease/tyrosine phosphatase [IPR005181] (1)                                                                                                                                                                                                                                                                                                                                           | -                         | C_uni97_0091_mRNA_4.1  | -                    |
| GF0034650 | 0                      | 1                | 0                 | Hypothetical protein (1)                                          |                                                                                                                                                                                                                                                                                                                                                                                                            |                                                                                                                                                                                                                                                                                                                                                                                             | -                         | C_uni97_0091_mRNA_33.1 | -                    |
| GF0034649 | 0                      | 1                | 0                 | Hypothetical protein (1)                                          |                                                                                                                                                                                                                                                                                                                                                                                                            |                                                                                                                                                                                                                                                                                                                                                                                             | -                         | C_uni97_0091_mRNA_30.1 | -                    |

| ID        | Num in C. citromatisae | Num in C. canalis | Num in P.ziflutata | Note                                                  | GO                                                                                                                                                                                                                                                                                                                                                                                   | InterPro                                                                                                                                                                                                                                                                                                                                                                                | Members in C.citromatisae | Members in C.canalis     | Members in P.ziflutata |
|-----------|------------------------|-------------------|--------------------|-------------------------------------------------------|--------------------------------------------------------------------------------------------------------------------------------------------------------------------------------------------------------------------------------------------------------------------------------------------------------------------------------------------------------------------------------------|-----------------------------------------------------------------------------------------------------------------------------------------------------------------------------------------------------------------------------------------------------------------------------------------------------------------------------------------------------------------------------------------|---------------------------|--------------------------|------------------------|
| GF0034648 | 0                      | 1                 | 1                  | 0 Obj-like ATPase 1 (1)                               | GTP binding [GO:0005525 molecular_function] (1)                                                                                                                                                                                                                                                                                                                                      | Beta-grap domain [IPR012675] (1); TGS-like domain [IPR013971] (1); TGS-like [IPR012676] (1); Domain of unknown function DUF933 [IPR013029] (1); P-loop containing nucleoside triphosphate hydrolase [IPR027417] (1); GTP binding domain [IPR006073] (1); Ribosome-binding ATPase YchJ/Obj-like ATPase 1 [IPR04396] (1); ObjG-type guanine nucleotide-binding (G)-domain [IPR031167] (1) | C_unihir_00091_mRNA_28.1  | -                        | -                      |
| GF0034647 | 0                      | 1                 | 1                  | 0 Hypothetical protein (1)                            | oxidoreductase activity, acting on NAD(P)H [GO:0016651 molecular_function] (1); electron transport chain [GO:002900 biological_process] (1)                                                                                                                                                                                                                                          | Leucine-rich repeat-containing N-terminal, plant-type [IPR013210] (1)                                                                                                                                                                                                                                                                                                                   | -                         | C_unihir_00091_mRNA_27.1 | -                      |
| GF0034646 | 0                      | 1                 | 1                  | 0 NADH-ubiquinone oxidoreductase 18 kDa subunit (1)   | oxidoreductase activity, acting on NAD(P)H [GO:0016651 molecular_function] (1); electron transport chain [GO:002900 biological_process] (1)                                                                                                                                                                                                                                          | NADH dehydrogenase ubiquinone Fe-S protein 4, mitochondrial [IPR006885] (4)                                                                                                                                                                                                                                                                                                             | -                         | C_unihir_00091_mRNA_12.1 | -                      |
| GF0034645 | 0                      | 1                 | 1                  | 0 Hypothetical protein (1)                            | -                                                                                                                                                                                                                                                                                                                                                                                    | -                                                                                                                                                                                                                                                                                                                                                                                       | -                         | C_unihir_00090_mRNA_66.1 | -                      |
| GF0034644 | 0                      | 1                 | 1                  | 0 Hypothetical protein (1)                            | -                                                                                                                                                                                                                                                                                                                                                                                    | -                                                                                                                                                                                                                                                                                                                                                                                       | -                         | C_unihir_00090_mRNA_5.1  | -                      |
| GF0034643 | 0                      | 1                 | 1                  | 0 Hypothetical protein (1)                            | -                                                                                                                                                                                                                                                                                                                                                                                    | FBD domain [IPR006566] (1)                                                                                                                                                                                                                                                                                                                                                              | -                         | C_unihir_00090_mRNA_46.1 | -                      |
| GF0034642 | 0                      | 1                 | 1                  | 0 Hypothetical protein (1)                            | -                                                                                                                                                                                                                                                                                                                                                                                    | -                                                                                                                                                                                                                                                                                                                                                                                       | -                         | C_unihir_00090_mRNA_2.1  | -                      |
| GF0034641 | 0                      | 1                 | 1                  | 0 GPN-loop GTPase 2 (1)                               | -                                                                                                                                                                                                                                                                                                                                                                                    | GPN-loop GTPase [IPR004130] (1); GPN-loop GTPase 2 [IPR030231] (1); P-loop containing nucleoside triphosphate hydrolase [IPR027417] (4)                                                                                                                                                                                                                                                 | -                         | C_unihir_00090_mRNA_1.1  | -                      |
| GF0034640 | 0                      | 1                 | 1                  | 0 Fatty acyl-CoA reductase 1 (1)                      | fatty-acyl-CoA reductase (alcohol-forming) activity [GO:0000019 molecular_function] (1)                                                                                                                                                                                                                                                                                              | Fatty acyl-CoA reductase [IPR020605] (1)                                                                                                                                                                                                                                                                                                                                                | -                         | C_unihir_00089_mRNA_58.1 | -                      |
| GF0034639 | 0                      | 1                 | 1                  | 0 Basic 7S globulin (1)                               | proteolysis [GO:0006508 biological_process] (1); aspartic-type endopeptidase activity [GO:0004190 molecular_function] (1)                                                                                                                                                                                                                                                            | Aspartic peptidase domain [IPR021109] (1); Xylinase inhibitor, C-terminal [IPR032991] (1); Xylinase inhibitor, N-terminal [IPR02861] (1); Aspartic peptidase AI family [IPR01461] (1)                                                                                                                                                                                                   | -                         | C_unihir_00089_mRNA_55.1 | -                      |
| GF0034638 | 0                      | 1                 | 1                  | 0 Hypothetical protein (1)                            | -                                                                                                                                                                                                                                                                                                                                                                                    | -                                                                                                                                                                                                                                                                                                                                                                                       | -                         | C_unihir_00089_mRNA_51.1 | -                      |
| GF0034637 | 0                      | 1                 | 1                  | 0 Hypothetical protein (1)                            | -                                                                                                                                                                                                                                                                                                                                                                                    | -                                                                                                                                                                                                                                                                                                                                                                                       | -                         | C_unihir_00089_mRNA_39.1 | -                      |
| GF0034636 | 0                      | 1                 | 1                  | 0 Hypothetical protein (1)                            | -                                                                                                                                                                                                                                                                                                                                                                                    | -                                                                                                                                                                                                                                                                                                                                                                                       | -                         | C_unihir_00089_mRNA_31.1 | -                      |
| GF0034635 | 0                      | 1                 | 1                  | 0 Hypothetical protein (1)                            | -                                                                                                                                                                                                                                                                                                                                                                                    | -                                                                                                                                                                                                                                                                                                                                                                                       | -                         | C_unihir_00089_mRNA_14.1 | -                      |
| GF0034634 | 0                      | 1                 | 1                  | 0 Hypothetical protein (1)                            | -                                                                                                                                                                                                                                                                                                                                                                                    | -                                                                                                                                                                                                                                                                                                                                                                                       | -                         | C_unihir_00088_mRNA_68.1 | -                      |
| GF0034633 | 0                      | 1                 | 1                  | 0 Hypothetical protein (1)                            | -                                                                                                                                                                                                                                                                                                                                                                                    | -                                                                                                                                                                                                                                                                                                                                                                                       | -                         | C_unihir_00088_mRNA_66.1 | -                      |
| GF0034632 | 0                      | 1                 | 1                  | 0 Putative glucan 1,3-beta-glucosidase A (1)          | actin filament binding [GO:0051015 molecular_function] (1); hydrolase activity, hydrolyzing O-glycosyl compounds [GO:0004575 molecular_function] (1); actin filament organization [GO:0007015 biological_process] (1); carbohydrate metabolic process [GO:0005975 biological_process] (1)                                                                                            | Glycoside hydrolase, catalytic domain [IPR013781] (1); Glycoside hydrolase superfamily [IPR017853] (1); Fascin [IPR010431] (1); Glycoside hydrolase, family 2 [IPR001547] (1)                                                                                                                                                                                                           | -                         | C_unihir_00088_mRNA_62.1 | -                      |
| GF0034631 | 0                      | 1                 | 1                  | 0 Hypothetical protein (1)                            | nucleotide binding [GO:0000166 molecular_function] (1)                                                                                                                                                                                                                                                                                                                               | Nucleotide-binding alpha-beta plat domain [IPR012677] (1); RNA recognition motif 2 [IPR007201] (1)                                                                                                                                                                                                                                                                                      | -                         | C_unihir_00088_mRNA_6.1  | -                      |
| GF0034630 | 0                      | 1                 | 1                  | 0 Hypothetical protein (1)                            | -                                                                                                                                                                                                                                                                                                                                                                                    | -                                                                                                                                                                                                                                                                                                                                                                                       | -                         | C_unihir_00088_mRNA_59.1 | -                      |
| GF0034629 | 0                      | 1                 | 1                  | 0 Hypothetical protein (1)                            | protein kinase activity [GO:0004672 molecular_function] (1); protein phosphorylation [GO:0006468 biological_process] (1); ATP binding [GO:0005524 molecular_function] (1)                                                                                                                                                                                                            | Protein kinase domain [IPR000719] (1); Protein kinase-like domain [IPR011009] (1); Protein kinase, ATP binding site [IPR017441] (1)                                                                                                                                                                                                                                                     | -                         | C_unihir_00088_mRNA_57.1 | -                      |
| GF0034628 | 0                      | 1                 | 1                  | 0 Hypothetical protein (1)                            | nucleic acid binding [GO:0003676 molecular_function] (1)                                                                                                                                                                                                                                                                                                                             | Ribonuclease H-like domain [IPR012337] (1); Ubequitin-fold modifier 1 [IPR005375] (1); Ubiquitin-related domain [IPR029071] (1)                                                                                                                                                                                                                                                         | -                         | C_unihir_00088_mRNA_56.1 | -                      |
| GF0034627 | 0                      | 1                 | 1                  | 0 Probable glycerol-3-phosphate acyltransferase 3 (1) | metabolic process [GO:0008152 biological_process] (1); methyltransferase activity [GO:0008168 molecular_function] (1); transference activity, transferring acyl groups [GO:0016746 molecular_function] (1)                                                                                                                                                                           | Methyltransferase type 11 [IPR013216] (1); S-adenosyl-L-methionine-dependent methyltransferase [IPR029031] (1); Phospholipid glycerol acyltransferase [IPR002123] (4)                                                                                                                                                                                                                   | -                         | C_unihir_00088_mRNA_34.1 | -                      |
| GF0034626 | 0                      | 1                 | 1                  | 0 Hypothetical protein (1)                            | -                                                                                                                                                                                                                                                                                                                                                                                    | Phosphatidylinositol-4-phosphate 5-kinase [IPR023616] (1); MORN motif [IPR003409] (1)                                                                                                                                                                                                                                                                                                   | -                         | C_unihir_00088_mRNA_2.1  | -                      |
| GF0034625 | 0                      | 1                 | 1                  | 0 Hypothetical protein (1)                            | -                                                                                                                                                                                                                                                                                                                                                                                    | -                                                                                                                                                                                                                                                                                                                                                                                       | -                         | C_unihir_00088_mRNA_14.1 | -                      |
| GF0034624 | 0                      | 1                 | 1                  | 0 Hypothetical protein (1)                            | -                                                                                                                                                                                                                                                                                                                                                                                    | -                                                                                                                                                                                                                                                                                                                                                                                       | -                         | C_unihir_00087_mRNA_63.1 | -                      |
| GF0034623 | 0                      | 1                 | 1                  | 0 Hemolysin A (1)                                     | methyltransferase activity [GO:0008168 molecular_function] (1); RNA binding [GO:0003723 molecular_function] (1); methylation [GO:0003229 biological_process] (1)                                                                                                                                                                                                                     | S-adenosyl-L-methionine-dependent methyltransferase [IPR029031] (1); RNA-binding S4 domain [IPR005942] (1); Ribosomal RNA methyltransferase SjaJ domain [IPR028077] (1)                                                                                                                                                                                                                 | -                         | C_unihir_00087_mRNA_58.1 | -                      |
| GF0034622 | 0                      | 1                 | 1                  | 0 Hypothetical protein (1)                            | -                                                                                                                                                                                                                                                                                                                                                                                    | -                                                                                                                                                                                                                                                                                                                                                                                       | -                         | C_unihir_00087_mRNA_45.1 | -                      |
| GF0034621 | 0                      | 1                 | 1                  | 0 Hypothetical protein (1)                            | -                                                                                                                                                                                                                                                                                                                                                                                    | -                                                                                                                                                                                                                                                                                                                                                                                       | -                         | C_unihir_00087_mRNA_23.1 | -                      |
| GF0034620 | 0                      | 1                 | 1                  | 0 Retrotransposon gag protein (1)                     | -                                                                                                                                                                                                                                                                                                                                                                                    | Retrotransposon gag domain [IPR005162] (1)                                                                                                                                                                                                                                                                                                                                              | -                         | C_unihir_00087_mRNA_22.1 | -                      |
| GF0034619 | 0                      | 1                 | 1                  | 0 Gag protein (1)                                     | -                                                                                                                                                                                                                                                                                                                                                                                    | -                                                                                                                                                                                                                                                                                                                                                                                       | -                         | C_unihir_00087_mRNA_21.1 | -                      |
| GF0034618 | 0                      | 1                 | 1                  | 0 Hypothetical protein (1)                            | -                                                                                                                                                                                                                                                                                                                                                                                    | -                                                                                                                                                                                                                                                                                                                                                                                       | -                         | C_unihir_00087_mRNA_20.1 | -                      |
| GF0034617 | 0                      | 1                 | 1                  | 0 Hypothetical protein (1)                            | cysteine-type peptidase activity [GO:0008234 molecular_function] (1); proteolysis [GO:0006508 biological_process] (1)                                                                                                                                                                                                                                                                | Ulp1 protease family, C-terminal catalytic domain [IPR003453] (1)                                                                                                                                                                                                                                                                                                                       | -                         | C_unihir_00087_mRNA_13.1 | -                      |
| GF0034616 | 0                      | 1                 | 1                  | 0 Hypothetical protein (1)                            | -                                                                                                                                                                                                                                                                                                                                                                                    | -                                                                                                                                                                                                                                                                                                                                                                                       | -                         | C_unihir_00086_mRNA_49.1 | -                      |
| GF0034615 | 0                      | 1                 | 1                  | 0 Hypothetical protein (1)                            | -                                                                                                                                                                                                                                                                                                                                                                                    | -                                                                                                                                                                                                                                                                                                                                                                                       | -                         | C_unihir_00086_mRNA_48.1 | -                      |
| GF0034614 | 0                      | 1                 | 1                  | 0 TSK - Wolfram syndrome transcribed RNA sequence (1) | integral component of membrane [GO:0016021 cellular_component] (1)                                                                                                                                                                                                                                                                                                                   | Tetraspanin/Perlecan [IPR018499] (1)                                                                                                                                                                                                                                                                                                                                                    | -                         | C_unihir_00086_mRNA_44.1 | -                      |
| GF0034613 | 0                      | 1                 | 1                  | 0 Hypothetical protein (1)                            | -                                                                                                                                                                                                                                                                                                                                                                                    | -                                                                                                                                                                                                                                                                                                                                                                                       | -                         | C_unihir_00086_mRNA_38.1 | -                      |
| GF0034612 | 0                      | 1                 | 1                  | 0 Putative thiamose biosynthetic enzyme 1 (1)         | -                                                                                                                                                                                                                                                                                                                                                                                    | NAD(P) binding domain [IPR016048] (1); RosB-like substrate binding domain [IPR029031] (1)                                                                                                                                                                                                                                                                                               | -                         | C_unihir_00086_mRNA_11.1 | -                      |
| GF0034611 | 0                      | 1                 | 1                  | 0 Hypothetical protein (1)                            | -                                                                                                                                                                                                                                                                                                                                                                                    | -                                                                                                                                                                                                                                                                                                                                                                                       | -                         | C_unihir_00085_mRNA_71.1 | -                      |
| GF0034610 | 0                      | 1                 | 1                  | 0 Hypothetical protein (1)                            | -                                                                                                                                                                                                                                                                                                                                                                                    | -                                                                                                                                                                                                                                                                                                                                                                                       | -                         | C_unihir_00085_mRNA_69.1 | -                      |
| GF0034609 | 0                      | 1                 | 1                  | 0 Hypothetical protein (1)                            | -                                                                                                                                                                                                                                                                                                                                                                                    | -                                                                                                                                                                                                                                                                                                                                                                                       | -                         | C_unihir_00085_mRNA_68.1 | -                      |
| GF0034608 | 0                      | 1                 | 1                  | 0 Hypothetical protein (1)                            | -                                                                                                                                                                                                                                                                                                                                                                                    | -                                                                                                                                                                                                                                                                                                                                                                                       | -                         | C_unihir_00085_mRNA_63.1 | -                      |
| GF0034607 | 0                      | 1                 | 1                  | 0 Hypothetical protein (1)                            | transference activity, transferring glycosyl groups [GO:0016757 molecular_function] (1); integral component of membrane [GO:0016021 cellular_component] (1)                                                                                                                                                                                                                          | Glycosyltransferase 34 [IPR006830] (1)                                                                                                                                                                                                                                                                                                                                                  | -                         | C_unihir_00085_mRNA_62.1 | -                      |
| GF0034606 | 0                      | 1                 | 1                  | 0 Receptor-like protein 33 (1)                        | -                                                                                                                                                                                                                                                                                                                                                                                    | -                                                                                                                                                                                                                                                                                                                                                                                       | -                         | C_unihir_00085_mRNA_52.1 | -                      |
| GF0034605 | 0                      | 1                 | 1                  | 0 Hypothetical protein (1)                            | -                                                                                                                                                                                                                                                                                                                                                                                    | Leucine-rich repeat domain, I domain-like [IPR012675] (1)                                                                                                                                                                                                                                                                                                                               | -                         | C_unihir_00085_mRNA_34.1 | -                      |
| GF0034604 | 0                      | 1                 | 1                  | 0 Proline-rich receptor-like protein kinase PERK4 (1) | protein phosphorylation [GO:0006468 biological_process] (1); protein kinase activity [GO:0004672 molecular_function] (1); ATP binding [GO:0005524 molecular_function] (1)                                                                                                                                                                                                            | Protein kinase-like domain [IPR011009] (1); Protein kinase domain [IPR000719] (1); Serine-threonine protein kinase, active site [IPR008271] (1); Serine/threonine dual specificity protein kinase, catalytic domain [IPR002290] (4)                                                                                                                                                     | -                         | C_unihir_00085_mRNA_2.1  | -                      |
| GF0034603 | 0                      | 1                 | 1                  | 0 Hypothetical protein (1)                            | -                                                                                                                                                                                                                                                                                                                                                                                    | -                                                                                                                                                                                                                                                                                                                                                                                       | -                         | C_unihir_00085_mRNA_10.1 | -                      |
| GF0034602 | 0                      | 1                 | 1                  | 0 Ribosomal RNA small subunit methyltransferase G (1) | -                                                                                                                                                                                                                                                                                                                                                                                    | -                                                                                                                                                                                                                                                                                                                                                                                       | -                         | C_unihir_00084_mRNA_6.1  | -                      |
| GF0034601 | 0                      | 1                 | 1                  | 0 Hypothetical protein (1)                            | -                                                                                                                                                                                                                                                                                                                                                                                    | -                                                                                                                                                                                                                                                                                                                                                                                       | -                         | C_unihir_00084_mRNA_5.1  | -                      |
| GF0034600 | 0                      | 1                 | 1                  | 0 Hypothetical protein (1)                            | -                                                                                                                                                                                                                                                                                                                                                                                    | -                                                                                                                                                                                                                                                                                                                                                                                       | -                         | C_unihir_00084_mRNA_4.1  | -                      |
| GF0034599 | 0                      | 1                 | 1                  | 0 Hypothetical protein (1)                            | -                                                                                                                                                                                                                                                                                                                                                                                    | -                                                                                                                                                                                                                                                                                                                                                                                       | -                         | C_unihir_00084_mRNA_36.1 | -                      |
| GF0034598 | 0                      | 1                 | 1                  | 0 Hypothetical protein (1)                            | -                                                                                                                                                                                                                                                                                                                                                                                    | -                                                                                                                                                                                                                                                                                                                                                                                       | -                         | C_unihir_00084_mRNA_3.1  | -                      |
| GF0034597 | 0                      | 1                 | 1                  | 0 Red chlorophyll catabolite reductase (1)            | -                                                                                                                                                                                                                                                                                                                                                                                    | Red chlorophyll catabolite reductase [IPR009439] (4)                                                                                                                                                                                                                                                                                                                                    | -                         | C_unihir_00084_mRNA_19.1 | -                      |
| GF0034596 | 0                      | 1                 | 1                  | 0 Triacylglycerol lipase (1)                          | lipid metabolic process [GO:0006629 biological_process] (1)                                                                                                                                                                                                                                                                                                                          | Fungal lipase-like domain [IPR020291] (1); Alpha/Beta hydrolase fold [IPR029058] (4)                                                                                                                                                                                                                                                                                                    | -                         | C_unihir_00084_mRNA_10.1 | -                      |
| GF0034595 | 0                      | 1                 | 1                  | 0 Hypothetical protein (1)                            | -                                                                                                                                                                                                                                                                                                                                                                                    | -                                                                                                                                                                                                                                                                                                                                                                                       | -                         | C_unihir_00083_mRNA_39.1 | -                      |
| GF0034594 | 0                      | 1                 | 1                  | 0 Hypothetical protein (1)                            | -                                                                                                                                                                                                                                                                                                                                                                                    | -                                                                                                                                                                                                                                                                                                                                                                                       | -                         | C_unihir_00083_mRNA_32.1 | -                      |
| GF0034593 | 0                      | 1                 | 1                  | 0 Retrotransposon protein, putative, unclassified (1) | -                                                                                                                                                                                                                                                                                                                                                                                    | -                                                                                                                                                                                                                                                                                                                                                                                       | -                         | C_unihir_00083_mRNA_30.1 | -                      |
| GF0034592 | 0                      | 1                 | 1                  | 0 Homogentisine phytyltransferase (1)                 | prenyltransferase activity [GO:0004659 molecular_function] (1); integral component of membrane [GO:0016021 cellular_component] (1)                                                                                                                                                                                                                                                   | UbA prenyltransferase family [IPR000577] (4)                                                                                                                                                                                                                                                                                                                                            | -                         | C_unihir_00083_mRNA_25.1 | -                      |
| GF0034591 | 0                      | 1                 | 1                  | 0 Hypothetical protein (1)                            | -                                                                                                                                                                                                                                                                                                                                                                                    | PMRN N-terminal domain [IPR025846] (1)                                                                                                                                                                                                                                                                                                                                                  | -                         | C_unihir_00083_mRNA_2.1  | -                      |
| GF0034590 | 0                      | 1                 | 1                  | 0 Hypothetical protein (1)                            | -                                                                                                                                                                                                                                                                                                                                                                                    | -                                                                                                                                                                                                                                                                                                                                                                                       | -                         | C_unihir_00082_mRNA_66.1 | -                      |
| GF0034589 | 0                      | 1                 | 1                  | 0 Hypothetical protein (1)                            | -                                                                                                                                                                                                                                                                                                                                                                                    | -                                                                                                                                                                                                                                                                                                                                                                                       | -                         | C_unihir_00082_mRNA_65.1 | -                      |
| GF0034588 | 0                      | 1                 | 1                  | 0 Hypothetical protein (1)                            | -                                                                                                                                                                                                                                                                                                                                                                                    | -                                                                                                                                                                                                                                                                                                                                                                                       | -                         | C_unihir_00082_mRNA_63.1 | -                      |
| GF0034587 | 0                      | 1                 | 1                  | 0 Hypothetical protein (1)                            | -                                                                                                                                                                                                                                                                                                                                                                                    | -                                                                                                                                                                                                                                                                                                                                                                                       | -                         | C_unihir_00082_mRNA_38.1 | -                      |
| GF0034586 | 0                      | 1                 | 1                  | 0 30S ribosomal protein S18, chlorophagic (1)         | intracellular [GO:0009652 cellular_component] (1); translation [GO:0006412 biological_process] (1); structural constituent of ribosome [GO:0003735 molecular_function] (1); electron carrier activity [GO:0000905 molecular_function] (1); cytochrome b6 complex [GO:0000912 cellular_component] (1); ribosome [GO:0005840 cellular_component] (1)                                   | Ribosomal protein S18 [IPR016448] (1); Ribosomal protein S18, conserved site [IPR018275] (1); Cytochrome b6-f complex subunit 6 [IPR007802] (1)                                                                                                                                                                                                                                         | -                         | C_unihir_00082_mRNA_31.1 | -                      |
| GF0034585 | 0                      | 1                 | 1                  | 0 DNA-directed RNA polymerase, alpha subunit (1)      | DNA-directed RNA polymerase activity [GO:0003899 molecular_function] (1); ribosome [GO:0005840 cellular_component] (1); protein dimerization activity [GO:0046983 molecular_function] (1); structural constituent of ribosome [GO:0003735 molecular_function] (1); translation [GO:0006412 biological_process] (1); transcription, DNA-templated [GO:0006351 biological_process] (1) | DNA-directed RNA polymerase, RBP11-like dimerization domain [IPR009025] (1); DNA-directed RNA polymerase, RpoA2/PoB2-type [IPR014251] (1); DNA-directed RNA polymerase, insert domain [IPR01285] (1); Ribosomal protein S11 [IPR019771] (1)                                                                                                                                             | -                         | C_unihir_00082_mRNA_29.1 | -                      |
| GF0034584 | 0                      | 1                 | 1                  | 0 Hypothetical protein (1)                            | -                                                                                                                                                                                                                                                                                                                                                                                    | -                                                                                                                                                                                                                                                                                                                                                                                       | -                         | C_unihir_00082_mRNA_24.1 | -                      |
| GF0034583 | 0                      | 1                 | 1                  | 0 Hypothetical protein (1)                            | -                                                                                                                                                                                                                                                                                                                                                                                    | -                                                                                                                                                                                                                                                                                                                                                                                       | -                         | C_unihir_00082_mRNA_23.1 | -                      |

| ID        | Num. in <i>C. crottensteini</i> | Num. in <i>C. caudata</i> | Num. in <i>P. trifidata</i> | Note                                                                   | GO                                                                                                                                                                                                                                                                                                                                                                     | InterPro                                                                                                                                                                                                                                                                                                                                                                                                                                                   | Members in <i>C. crottensteini</i> | Members in <i>C. caudata</i> | Members in <i>P. trifidata</i> |
|-----------|---------------------------------|---------------------------|-----------------------------|------------------------------------------------------------------------|------------------------------------------------------------------------------------------------------------------------------------------------------------------------------------------------------------------------------------------------------------------------------------------------------------------------------------------------------------------------|------------------------------------------------------------------------------------------------------------------------------------------------------------------------------------------------------------------------------------------------------------------------------------------------------------------------------------------------------------------------------------------------------------------------------------------------------------|------------------------------------|------------------------------|--------------------------------|
| GF0034582 | 0                               | 1                         | 0                           | Ankyrin repeat protein (1)                                             | protein binding [GO:005515 molecular_function] (1)                                                                                                                                                                                                                                                                                                                     | Ankyrin repeat-containing domain [IPR020631] (1); PCL domain [IPR020611] (1); Ankyrin repeat [IPR002110] (4)                                                                                                                                                                                                                                                                                                                                               | -                                  | C_uni_h00082_mRNA_20.1       | -                              |
| GF0034581 | 0                               | 1                         | 0                           | Hypothetical protein (1)                                               | -                                                                                                                                                                                                                                                                                                                                                                      | -                                                                                                                                                                                                                                                                                                                                                                                                                                                          | -                                  | C_uni_h00082_mRNA_19.1       | -                              |
| GF0034580 | 0                               | 1                         | 0                           | Hypothetical protein (1)                                               | -                                                                                                                                                                                                                                                                                                                                                                      | -                                                                                                                                                                                                                                                                                                                                                                                                                                                          | -                                  | C_uni_h00081_mRNA_77.1       | -                              |
| GF0034579 | 0                               | 1                         | 0                           | Receptor like protein 27 (1)                                           | protein binding [GO:005515 molecular_function] (1)                                                                                                                                                                                                                                                                                                                     | Leucine-rich repeat [IPR016111] (1); Leucine-rich repeat domain, L domain-like [IPR026751] (1)                                                                                                                                                                                                                                                                                                                                                             | -                                  | C_uni_h00081_mRNA_76.1       | -                              |
| GF0034578 | 0                               | 1                         | 0                           | Truncated verticillium with resistance-like protein (1)                | protein binding [GO:005515 molecular_function] (1)                                                                                                                                                                                                                                                                                                                     | Leucine-rich repeat-containing N-terminal, plant-type [IPR012101] (1); Leucine-rich repeat [IPR016111] (1); Leucine-rich repeat, typical subtype [IPR005919] (1); Leucine-rich repeat domain, L domain-like [IPR026751] (1)                                                                                                                                                                                                                                | -                                  | C_uni_h00081_mRNA_75.1       | -                              |
| GF0034577 | 0                               | 1                         | 0                           | Hypothetical protein (1)                                               | glucose-6-phosphate dehydrogenase activity [GO:000445 molecular_function] (1); oxidation-reduction process [GO:005514 biological_process] (1); glucose metabolic process [GO:0006066 biological_process] (1); NADP binding [GO:0050661 molecular_function] (1)                                                                                                         | Glucose-6-phosphate dehydrogenase [IPR01282] (1); NAD(P)-binding domain [IPR016601] (1); Glucose-6-phosphate dehydrogenase, C-terminal [IPR026751] (1); Glucose-6-phosphate dehydrogenase, NAD-binding [IPR02674] (1)                                                                                                                                                                                                                                      | -                                  | C_uni_h00081_mRNA_73.1       | -                              |
| GF0034576 | 0                               | 1                         | 0                           | Braassinolide insensitive 1, putative (1)                              | protein binding [GO:005515 molecular_function] (1)                                                                                                                                                                                                                                                                                                                     | Leucine-rich repeat domain, L domain-like [IPR033575] (1); Leucine-rich repeat [IPR016111] (1)                                                                                                                                                                                                                                                                                                                                                             | -                                  | C_uni_h00081_mRNA_70.1       | -                              |
| GF0034575 | 0                               | 1                         | 0                           | Hypothetical protein (1)                                               | protein binding [GO:005515 molecular_function] (1)                                                                                                                                                                                                                                                                                                                     | Leucine-rich repeat [IPR016111] (1); Leucine-rich repeat domain, L domain-like [IPR026751] (1)                                                                                                                                                                                                                                                                                                                                                             | -                                  | C_uni_h00081_mRNA_68.1       | -                              |
| GF0034574 | 0                               | 1                         | 0                           | Transposon protein, putative, Mutator sub-class (1)                    | zinc ion binding [GO:0008270 molecular_function] (1)                                                                                                                                                                                                                                                                                                                   | Zinc finger, PAM2-type [IPR006644] (1); Transposase, Mutator, plam [IPR004312] (1); Zinc finger, SWIM-type [IPR007527] (1)                                                                                                                                                                                                                                                                                                                                 | -                                  | C_uni_h00081_mRNA_34.1       | -                              |
| GF0034573 | 0                               | 1                         | 0                           | Hypothetical protein (1)                                               | -                                                                                                                                                                                                                                                                                                                                                                      | -                                                                                                                                                                                                                                                                                                                                                                                                                                                          | -                                  | C_uni_h00081_mRNA_33.1       | -                              |
| GF0034572 | 0                               | 1                         | 0                           | Hypothetical protein (1)                                               | -                                                                                                                                                                                                                                                                                                                                                                      | -                                                                                                                                                                                                                                                                                                                                                                                                                                                          | -                                  | C_uni_h00081_mRNA_28.1       | -                              |
| GF0034571 | 0                               | 1                         | 0                           | Hypothetical protein (1)                                               | -                                                                                                                                                                                                                                                                                                                                                                      | -                                                                                                                                                                                                                                                                                                                                                                                                                                                          | -                                  | C_uni_h00081_mRNA_22.1       | -                              |
| GF0034570 | 0                               | 1                         | 0                           | Hypothetical protein (1)                                               | -                                                                                                                                                                                                                                                                                                                                                                      | -                                                                                                                                                                                                                                                                                                                                                                                                                                                          | -                                  | C_uni_h00081_mRNA_21.1       | -                              |
| GF0034569 | 0                               | 1                         | 0                           | Hypothetical protein (1)                                               | -                                                                                                                                                                                                                                                                                                                                                                      | -                                                                                                                                                                                                                                                                                                                                                                                                                                                          | -                                  | C_uni_h00080_mRNA_44.1       | -                              |
| GF0034568 | 0                               | 1                         | 0                           | Hypothetical protein (1)                                               | -                                                                                                                                                                                                                                                                                                                                                                      | -                                                                                                                                                                                                                                                                                                                                                                                                                                                          | -                                  | C_uni_h00080_mRNA_42.1       | -                              |
| GF0034567 | 0                               | 1                         | 0                           | Hypothetical protein (1)                                               | -                                                                                                                                                                                                                                                                                                                                                                      | -                                                                                                                                                                                                                                                                                                                                                                                                                                                          | -                                  | C_uni_h00080_mRNA_39.1       | -                              |
| GF0034566 | 0                               | 1                         | 0                           | Hypothetical protein (1)                                               | -                                                                                                                                                                                                                                                                                                                                                                      | -                                                                                                                                                                                                                                                                                                                                                                                                                                                          | -                                  | C_uni_h00080_mRNA_38.1       | -                              |
| GF0034565 | 0                               | 1                         | 0                           | Hypothetical protein (1)                                               | -                                                                                                                                                                                                                                                                                                                                                                      | -                                                                                                                                                                                                                                                                                                                                                                                                                                                          | -                                  | C_uni_h00080_mRNA_36.1       | -                              |
| GF0034564 | 0                               | 1                         | 0                           | Hypothetical protein (1)                                               | -                                                                                                                                                                                                                                                                                                                                                                      | -                                                                                                                                                                                                                                                                                                                                                                                                                                                          | -                                  | C_uni_h00080_mRNA_35.1       | -                              |
| GF0034563 | 0                               | 1                         | 0                           | Hypothetical protein (1)                                               | -                                                                                                                                                                                                                                                                                                                                                                      | -                                                                                                                                                                                                                                                                                                                                                                                                                                                          | -                                  | C_uni_h00080_mRNA_32.1       | -                              |
| GF0034562 | 0                               | 1                         | 0                           | NBS-LRR type disease resistance protein (1)                            | -                                                                                                                                                                                                                                                                                                                                                                      | Leucine-rich repeat domain, L domain-like [IPR026751] (1)                                                                                                                                                                                                                                                                                                                                                                                                  | -                                  | C_uni_h00080_mRNA_31.1       | -                              |
| GF0034561 | 0                               | 1                         | 0                           | Importin subunit alpha (1)                                             | protein binding [GO:005515 molecular_function] (1); binding [GO:0005488 molecular_function] (1)                                                                                                                                                                                                                                                                        | Armadillo-type 6A [IPR016024] (1); Armadillo-like [IPR019091] (1); Atypical Arm repeat [IPR024113] (1); Armadillo [IPR000225] (1)                                                                                                                                                                                                                                                                                                                          | -                                  | C_uni_h00080_mRNA_29.1       | -                              |
| GF0034560 | 0                               | 1                         | 0                           | Hypothetical protein (1)                                               | -                                                                                                                                                                                                                                                                                                                                                                      | -                                                                                                                                                                                                                                                                                                                                                                                                                                                          | -                                  | C_uni_h00080_mRNA_27.1       | -                              |
| GF0034559 | 0                               | 1                         | 0                           | Hypothetical protein (1)                                               | binding [GO:0005488 molecular_function] (1)                                                                                                                                                                                                                                                                                                                            | Armadillo-type 6A [IPR016024] (1)                                                                                                                                                                                                                                                                                                                                                                                                                          | -                                  | C_uni_h00080_mRNA_25.1       | -                              |
| GF0034558 | 0                               | 1                         | 0                           | Hypothetical protein (1)                                               | -                                                                                                                                                                                                                                                                                                                                                                      | Fadomycin/cyanomycin phosphatase [IPR005135] (1)                                                                                                                                                                                                                                                                                                                                                                                                           | -                                  | C_uni_h00080_mRNA_19.1       | -                              |
| GF0034557 | 0                               | 1                         | 0                           | Hypothetical protein (1)                                               | protein prenylation [GO:0018342 biological_process] (1); protein prenyltransferase activity [GO:0008318 molecular_function] (1)                                                                                                                                                                                                                                        | Protein prenyltransferase, alpha subunit [IPR020881] (1)                                                                                                                                                                                                                                                                                                                                                                                                   | -                                  | C_uni_h00080_mRNA_18.1       | -                              |
| GF0034556 | 0                               | 1                         | 0                           | Hypothetical protein (1)                                               | -                                                                                                                                                                                                                                                                                                                                                                      | -                                                                                                                                                                                                                                                                                                                                                                                                                                                          | -                                  | C_uni_h00080_mRNA_17.1       | -                              |
| GF0034555 | 0                               | 1                         | 0                           | Hypothetical protein (1)                                               | -                                                                                                                                                                                                                                                                                                                                                                      | -                                                                                                                                                                                                                                                                                                                                                                                                                                                          | -                                  | C_uni_h00080_mRNA_13.1       | -                              |
| GF0034554 | 0                               | 1                         | 0                           | Hypothetical protein (1)                                               | -                                                                                                                                                                                                                                                                                                                                                                      | -                                                                                                                                                                                                                                                                                                                                                                                                                                                          | -                                  | C_uni_h00079_mRNA_8.1        | -                              |
| GF0034553 | 0                               | 1                         | 0                           | Hypothetical protein (1)                                               | -                                                                                                                                                                                                                                                                                                                                                                      | Lysine-rich nuclear protein 1 [IPR025123] (1); Small acidic protein-like domain [IPR028124] (1)                                                                                                                                                                                                                                                                                                                                                            | -                                  | C_uni_h00079_mRNA_67.1       | -                              |
| GF0034552 | 0                               | 1                         | 0                           | Hypothetical protein (1)                                               | protein kinase activity [GO:0004672 molecular_function] (1); protein phosphorylation [GO:0006468 biological_process] (1); ATP binding [GO:0005524 molecular_function] (1)                                                                                                                                                                                              | Protein kinase-like domain [IPR01009] (1); Protein kinase domain [IPR000719] (1); Serine-threonine/tyrosine-protein kinase catalytic domain [IPR01245] (1); Serine/threonine/tyrosine-protein kinase, catalytic domain [IPR002290] (1); Serine/threonine-protein kinase, active site [IPR008271] (1)                                                                                                                                                       | -                                  | C_uni_h00079_mRNA_5.1        | -                              |
| GF0034551 | 0                               | 1                         | 0                           | Tubulin beta-1 chain (1)                                               | GTPase activity [GO:0003924 molecular_function] (1); structural constituent of cytoskeleton [GO:0005200 molecular_function] (1); microtubule [GO:000574 cellular_component] (1); GTP binding [GO:0005524 molecular_function] (1); microtubule-based process [GO:0007017 biological_process] (1)                                                                        | Beta tubulin [IPR002453] (1); Tubulin, conserved aa [IPR017975] (1); Tubulin F52, GTPase domain [IPR005089] (1); Tubulin, C-terminal [IPR012101] (1); Tubulin F52, C-terminal [IPR008280] (1); Tubulin [IPR002171] (4)                                                                                                                                                                                                                                     | -                                  | C_uni_h00079_mRNA_49.1       | -                              |
| GF0034550 | 0                               | 1                         | 0                           | Hypothetical protein (1)                                               | -                                                                                                                                                                                                                                                                                                                                                                      | -                                                                                                                                                                                                                                                                                                                                                                                                                                                          | -                                  | C_uni_h00079_mRNA_42.1       | -                              |
| GF0034549 | 0                               | 1                         | 0                           | Hypothetical protein (1)                                               | DNA binding [GO:0008677 molecular_function] (1)                                                                                                                                                                                                                                                                                                                        | Zinc finger, BED-type [IPR005656] (1)                                                                                                                                                                                                                                                                                                                                                                                                                      | -                                  | C_uni_h00079_mRNA_33.1       | -                              |
| GF0034548 | 0                               | 1                         | 0                           | Hypothetical protein (1)                                               | integral component of membrane [GO:0016021 cellular_component] (1); membrane [GO:0006020 cellular_component] (1); transmembrane transporter activity [GO:0022857 molecular_function] (1)                                                                                                                                                                               | WAT1-related protein [IPR030184] (1); EamA domain [IPR000620] (1)                                                                                                                                                                                                                                                                                                                                                                                          | -                                  | C_uni_h00079_mRNA_32.1       | -                              |
| GF0034547 | 0                               | 1                         | 0                           | Auxin-induced SNG4 (1)                                                 | integral component of membrane [GO:0016021 cellular_component] (1); transmembrane transporter activity [GO:0022857 molecular_function] (1); membrane [GO:0006020 cellular_component] (1)                                                                                                                                                                               | EamA domain [IPR000620] (1); WAT1-related protein [IPR030184] (1)                                                                                                                                                                                                                                                                                                                                                                                          | -                                  | C_uni_h00079_mRNA_31.1       | -                              |
| GF0034546 | 0                               | 1                         | 0                           | Hypothetical protein (1)                                               | -                                                                                                                                                                                                                                                                                                                                                                      | -                                                                                                                                                                                                                                                                                                                                                                                                                                                          | -                                  | C_uni_h00079_mRNA_29.1       | -                              |
| GF0034545 | 0                               | 1                         | 0                           | Hypothetical protein (1)                                               | -                                                                                                                                                                                                                                                                                                                                                                      | -                                                                                                                                                                                                                                                                                                                                                                                                                                                          | -                                  | C_uni_h00079_mRNA_11.1       | -                              |
| GF0034544 | 0                               | 1                         | 0                           | Hypothetical protein (1)                                               | -                                                                                                                                                                                                                                                                                                                                                                      | -                                                                                                                                                                                                                                                                                                                                                                                                                                                          | -                                  | C_uni_h00079_mRNA_9.1        | -                              |
| GF0034543 | 0                               | 1                         | 0                           | Hypothetical protein (1)                                               | oxidation-reduction process [GO:005514 biological_process] (1); oxidoreductase activity, acting on paired donors, with incorporation or reduction of molecular oxygen [GO:0016705 molecular_function] (1); iron ion binding [GO:0005506 molecular_function] (1); heme binding [GO:0020037 molecular_function] (1)                                                      | Cytochrome P450, E-class, group 1 [IPR002401] (1); Cytochrome P450 [IPR001128] (4)                                                                                                                                                                                                                                                                                                                                                                         | -                                  | C_uni_h00078_mRNA_7.1        | -                              |
| GF0034542 | 0                               | 1                         | 0                           | Hypothetical protein (1)                                               | protein binding [GO:005515 molecular_function] (1)                                                                                                                                                                                                                                                                                                                     | TRAF-like [IPR008974] (1); MATH/RAF domain [IPR020883] (1)                                                                                                                                                                                                                                                                                                                                                                                                 | -                                  | C_uni_h00078_mRNA_39.1       | -                              |
| GF0034541 | 0                               | 1                         | 0                           | Hypothetical protein (1)                                               | -                                                                                                                                                                                                                                                                                                                                                                      | -                                                                                                                                                                                                                                                                                                                                                                                                                                                          | -                                  | C_uni_h00078_mRNA_23.1       | -                              |
| GF0034540 | 0                               | 1                         | 0                           | Hypothetical protein (1)                                               | -                                                                                                                                                                                                                                                                                                                                                                      | -                                                                                                                                                                                                                                                                                                                                                                                                                                                          | -                                  | C_uni_h00078_mRNA_22.1       | -                              |
| GF0034539 | 0                               | 1                         | 0                           | Hypothetical protein (1)                                               | -                                                                                                                                                                                                                                                                                                                                                                      | -                                                                                                                                                                                                                                                                                                                                                                                                                                                          | -                                  | C_uni_h00078_mRNA_13.1       | -                              |
| GF0034538 | 0                               | 1                         | 0                           | Hypothetical protein (1)                                               | -                                                                                                                                                                                                                                                                                                                                                                      | -                                                                                                                                                                                                                                                                                                                                                                                                                                                          | -                                  | C_uni_h00078_mRNA_12.1       | -                              |
| GF0034537 | 0                               | 1                         | 0                           | Hypothetical protein (1)                                               | -                                                                                                                                                                                                                                                                                                                                                                      | -                                                                                                                                                                                                                                                                                                                                                                                                                                                          | -                                  | C_uni_h00077_mRNA_75.1       | -                              |
| GF0034536 | 0                               | 1                         | 0                           | Hexosyltransferase (1)                                                 | transferase activity, transferring glycosyl groups [GO:0016757 molecular_function] (1); polylacturonate 4-epimerase [GO:00046872 molecular_function] (1)                                                                                                                                                                                                               | Plant galacturonosyltransferase GAUT group [IPR029933] (1); Nucleotide-diphosphate transferase [IPR029044] (1); Glycosyl transferase, family 8 [IPR002495] (1)                                                                                                                                                                                                                                                                                             | -                                  | C_uni_h00077_mRNA_64.1       | -                              |
| GF0034535 | 0                               | 1                         | 0                           | Hypothetical protein (1)                                               | protein binding [GO:005515 molecular_function] (1)                                                                                                                                                                                                                                                                                                                     | Ubiquitin-related domain [IPR029071] (1); Ubiquitin [IPR019956] (1); Ubiquitin domain [IPR000626] (1)                                                                                                                                                                                                                                                                                                                                                      | -                                  | C_uni_h00077_mRNA_1.1        | -                              |
| GF0034534 | 0                               | 1                         | 0                           | Hypothetical protein (1)                                               | -                                                                                                                                                                                                                                                                                                                                                                      | -                                                                                                                                                                                                                                                                                                                                                                                                                                                          | -                                  | C_uni_h00076_mRNA_59.1       | -                              |
| GF0034533 | 0                               | 1                         | 0                           | Hypothetical protein (1)                                               | -                                                                                                                                                                                                                                                                                                                                                                      | -                                                                                                                                                                                                                                                                                                                                                                                                                                                          | -                                  | C_uni_h00076_mRNA_50.1       | -                              |
| GF0034532 | 0                               | 1                         | 0                           | Lipoygenase (1)                                                        | oxidoreductase activity [GO:0016491 molecular_function] (1); oxidation-reduction process [GO:005514 biological_process] (1); oxidoreductase activity, acting on single donors with incorporation of two atoms of oxygen [GO:0016702 molecular_function] (1); metal ion binding [GO:0046872 molecular_function] (1); protein binding [GO:005515 molecular_function] (1) | PLATLH2 domain [IPR001024] (1); Lipoygenase domain 1 [IPR027431] (1); Lipoygenase [IPR009907] (1); Lipoygenase, plant [IPR012404] (1); Lipoygenase, C-terminal [IPR013819] (1)                                                                                                                                                                                                                                                                             | -                                  | C_uni_h00076_mRNA_40.1       | -                              |
| GF0034531 | 0                               | 1                         | 0                           | G-type lectin S-receptor-like serine/threonine-protein kinase RLKI (1) | protein serine/threonine kinase activity [GO:0004674 molecular_function] (1); protein kinase activity [GO:0004672 molecular_function] (1); protein phosphorylation [GO:0006468 biological_process] (1); ATP binding [GO:0005524 molecular_function] (1)                                                                                                                | Protein kinase-like domain [IPR01009] (1); Concavallin A-like lectin/glycanase domain [IPR013320] (1); S-receptor-like serine/threonine-protein kinase [IPR024171] (1); Protein kinase domain [IPR000719] (1); Bulb-type lectin domain [IPR001480] (1); Protein kinase, ATP binding site [IPR017441] (1); Serine/threonine-protein kinase, active site [IPR008271] (1); Serine/threonine dual specificity protein kinase, catalytic domain [IPR002290] (1) | -                                  | C_uni_h00076_mRNA_30.1       | -                              |
| GF0034530 | 0                               | 1                         | 0                           | Hypothetical protein (1)                                               | -                                                                                                                                                                                                                                                                                                                                                                      | Serine/threonine dual specificity protein kinase, catalytic domain [IPR002290] (1); Protein kinase, ATP binding site [IPR017441] (1); Serine/threonine-protein kinase, active site [IPR008271] (1); Protein kinase domain [IPR000719] (1); Concavallin A-like lectin/glycanase domain [IPR013320] (1); Protein kinase-like domain [IPR01009] (1); Bulb-type lectin domain [IPR001480] (1)                                                                  | -                                  | C_uni_h00076_mRNA_19.1       | -                              |
| GF0034529 | 0                               | 1                         | 0                           | G-type lectin S-receptor-like serine/threonine-protein kinase RLKI (1) | protein kinase activity [GO:0004672 molecular_function] (1); protein phosphorylation [GO:0006468 biological_process] (1); ATP binding [GO:0005524 molecular_function] (1)                                                                                                                                                                                              | Ribonucleic H-like domain [IPR012337] (1); Ribonucleic H domain [IPR002156] (1)                                                                                                                                                                                                                                                                                                                                                                            | -                                  | C_uni_h00076_mRNA_15.1       | -                              |
| GF0034528 | 0                               | 1                         | 0                           | Hypothetical protein (1)                                               | nucleic acid binding [GO:0003676 molecular_function] (1); RNA-DNA hybrid ribonuclease activity [GO:0004521 molecular_function] (1)                                                                                                                                                                                                                                     | -                                                                                                                                                                                                                                                                                                                                                                                                                                                          | -                                  | -                            | -                              |
| GF0034527 | 0                               | 1                         | 0                           | Hypothetical protein (1)                                               | -                                                                                                                                                                                                                                                                                                                                                                      | -                                                                                                                                                                                                                                                                                                                                                                                                                                                          | -                                  | -                            | -                              |

| ID        | Num. in <i>C. crottensteini</i> | Num. in <i>C. caudib</i> | Num. in <i>P. putidans</i> | Note                                                                        | GO                                                                                                                                                                                                                                           | InterPro                                                                                                                                                                                                                                                                                                                                                                                                                                                                                                                                                                                                                                                                                                                       | Members in <i>C. crottensteini</i> | Members in <i>C. caudib</i> | Members in <i>P. putidans</i> |
|-----------|---------------------------------|--------------------------|----------------------------|-----------------------------------------------------------------------------|----------------------------------------------------------------------------------------------------------------------------------------------------------------------------------------------------------------------------------------------|--------------------------------------------------------------------------------------------------------------------------------------------------------------------------------------------------------------------------------------------------------------------------------------------------------------------------------------------------------------------------------------------------------------------------------------------------------------------------------------------------------------------------------------------------------------------------------------------------------------------------------------------------------------------------------------------------------------------------------|------------------------------------|-----------------------------|-------------------------------|
| GF0034526 | 0                               | 1                        | 0                          | Hypothetical protein (1)                                                    |                                                                                                                                                                                                                                              | NAD(P)-binding domain [IPR016040] (1)                                                                                                                                                                                                                                                                                                                                                                                                                                                                                                                                                                                                                                                                                          | -                                  | C_unihii_00075_mRNA_43.1    | -                             |
| GF0034525 | 0                               | 1                        | 0                          | Hypothetical protein (1)                                                    |                                                                                                                                                                                                                                              | -                                                                                                                                                                                                                                                                                                                                                                                                                                                                                                                                                                                                                                                                                                                              | -                                  | C_unihii_00075_mRNA_42.1    | -                             |
| GF0034524 | 0                               | 1                        | 0                          | Hypothetical protein (1)                                                    |                                                                                                                                                                                                                                              | -                                                                                                                                                                                                                                                                                                                                                                                                                                                                                                                                                                                                                                                                                                                              | -                                  | C_unihii_00075_mRNA_41.1    | -                             |
| GF0034523 | 0                               | 1                        | 0                          | Hypothetical protein (1)                                                    |                                                                                                                                                                                                                                              | Gag-polyprotein of LTR copia-type [IPR029472] (1)                                                                                                                                                                                                                                                                                                                                                                                                                                                                                                                                                                                                                                                                              | -                                  | C_unihii_00075_mRNA_40.1    | -                             |
| GF0034522 | 0                               | 1                        | 0                          | Transcription factor (1)                                                    | ATP-dependent DNA helicase activity [GO:0004802] molecular_function (1); nucleus [GO:0005634] cellular_component (1); nucleotide excision repair [GO:0006239] biological_process (1); core TFIIH complex [GO:0000439] cellular_component (1) | Transcription factor TFIIH subunit p52.7B2 [IPR004598] (1); Helicase XPR52_2, N-terminal domain [IPR032830] (1)                                                                                                                                                                                                                                                                                                                                                                                                                                                                                                                                                                                                                | -                                  | C_unihii_00075_mRNA_4.1     | -                             |
| GF0034521 | 0                               | 1                        | 0                          | Hypothetical protein (1)                                                    |                                                                                                                                                                                                                                              | -                                                                                                                                                                                                                                                                                                                                                                                                                                                                                                                                                                                                                                                                                                                              | -                                  | C_unihii_00075_mRNA_39.1    | -                             |
| GF0034520 | 0                               | 1                        | 0                          | Hypothetical protein (1)                                                    | protein phosphorylation [GO:0006468] biological_process (1); protein kinase activity [GO:0004672] molecular_function (1); ATP binding [GO:0005524] molecular_function (1)                                                                    | Serine-threonine-tyrosine protein kinase catalytic domain [IPR001245] (1); Putrescine-specific repeat [IPR002885] (1); Protein kinase domain [IPR000719] (1); Protein kinase-like domain [IPR011009] (1)                                                                                                                                                                                                                                                                                                                                                                                                                                                                                                                       | -                                  | C_unihii_00075_mRNA_37.1    | -                             |
| GF0034519 | 0                               | 1                        | 0                          | Hypothetical protein (1)                                                    |                                                                                                                                                                                                                                              | -                                                                                                                                                                                                                                                                                                                                                                                                                                                                                                                                                                                                                                                                                                                              | -                                  | C_unihii_00075_mRNA_36.1    | -                             |
| GF0034518 | 0                               | 1                        | 0                          | Hypothetical protein (1)                                                    |                                                                                                                                                                                                                                              | -                                                                                                                                                                                                                                                                                                                                                                                                                                                                                                                                                                                                                                                                                                                              | -                                  | C_unihii_00075_mRNA_32.1    | -                             |
| GF0034517 | 0                               | 1                        | 0                          | Hypothetical protein (1)                                                    |                                                                                                                                                                                                                                              | -                                                                                                                                                                                                                                                                                                                                                                                                                                                                                                                                                                                                                                                                                                                              | -                                  | C_unihii_00075_mRNA_25.1    | -                             |
| GF0034516 | 0                               | 1                        | 0                          | Hypothetical protein (1)                                                    | nucleotide excision repair [GO:0006239] biological_process (1); core TFIIH complex [GO:0000439] cellular_component (1); ATP-dependent DNA helicase activity [GO:0004802] molecular_function (1); nucleus [GO:0005634] cellular_component (1) | Transcription factor TFIIH subunit p52.7B2 [IPR004598] (1)                                                                                                                                                                                                                                                                                                                                                                                                                                                                                                                                                                                                                                                                     | -                                  | C_unihii_00075_mRNA_1.1     | -                             |
| GF0034515 | 0                               | 1                        | 0                          | Hypothetical protein (1)                                                    |                                                                                                                                                                                                                                              | -                                                                                                                                                                                                                                                                                                                                                                                                                                                                                                                                                                                                                                                                                                                              | -                                  | C_unihii_00074_mRNA_69.1    | -                             |
| GF0034514 | 0                               | 1                        | 0                          | Hypothetical protein (1)                                                    | zinc ion binding [GO:0008270] molecular_function (1); nucleic acid binding [GO:0003676] molecular_function (1)                                                                                                                               | Zinc finger, CCHC-type [IPR001878] (1); Viral movement protein [IPR028191] (1)                                                                                                                                                                                                                                                                                                                                                                                                                                                                                                                                                                                                                                                 | -                                  | C_unihii_00074_mRNA_67.1    | -                             |
| GF0034513 | 0                               | 1                        | 0                          | Hypothetical protein (1)                                                    |                                                                                                                                                                                                                                              | -                                                                                                                                                                                                                                                                                                                                                                                                                                                                                                                                                                                                                                                                                                                              | -                                  | C_unihii_00074_mRNA_60.1    | -                             |
| GF0034512 | 0                               | 1                        | 0                          | Hypothetical protein (1)                                                    |                                                                                                                                                                                                                                              | -                                                                                                                                                                                                                                                                                                                                                                                                                                                                                                                                                                                                                                                                                                                              | -                                  | C_unihii_00074_mRNA_58.1    | -                             |
| GF0034511 | 0                               | 1                        | 0                          | Hypothetical protein (1)                                                    |                                                                                                                                                                                                                                              | -                                                                                                                                                                                                                                                                                                                                                                                                                                                                                                                                                                                                                                                                                                                              | -                                  | C_unihii_00074_mRNA_56.1    | -                             |
| GF0034510 | 0                               | 1                        | 0                          | Hypothetical protein (1)                                                    |                                                                                                                                                                                                                                              | -                                                                                                                                                                                                                                                                                                                                                                                                                                                                                                                                                                                                                                                                                                                              | -                                  | C_unihii_00074_mRNA_55.1    | -                             |
| GF0034509 | 0                               | 1                        | 0                          | Dual specificity phosphatase Cdc25 (1)                                      |                                                                                                                                                                                                                                              | Rhodensine-like domain [IPR001763] (1)                                                                                                                                                                                                                                                                                                                                                                                                                                                                                                                                                                                                                                                                                         | -                                  | C_unihii_00074_mRNA_54.1    | -                             |
| GF0034508 | 0                               | 1                        | 0                          | Hypothetical protein (1)                                                    |                                                                                                                                                                                                                                              | Rhodensine-like domain [IPR001763] (1)                                                                                                                                                                                                                                                                                                                                                                                                                                                                                                                                                                                                                                                                                         | -                                  | C_unihii_00074_mRNA_53.1    | -                             |
| GF0034507 | 0                               | 1                        | 0                          | Hypothetical protein (1)                                                    |                                                                                                                                                                                                                                              | -                                                                                                                                                                                                                                                                                                                                                                                                                                                                                                                                                                                                                                                                                                                              | -                                  | C_unihii_00074_mRNA_51.1    | -                             |
| GF0034506 | 0                               | 1                        | 0                          | Hypothetical protein (1)                                                    |                                                                                                                                                                                                                                              | -                                                                                                                                                                                                                                                                                                                                                                                                                                                                                                                                                                                                                                                                                                                              | -                                  | C_unihii_00074_mRNA_50.1    | -                             |
| GF0034505 | 0                               | 1                        | 0                          | Hypothetical protein (1)                                                    |                                                                                                                                                                                                                                              | -                                                                                                                                                                                                                                                                                                                                                                                                                                                                                                                                                                                                                                                                                                                              | -                                  | C_unihii_00074_mRNA_49.1    | -                             |
| GF0034504 | 0                               | 1                        | 0                          | Hypothetical protein (1)                                                    |                                                                                                                                                                                                                                              | -                                                                                                                                                                                                                                                                                                                                                                                                                                                                                                                                                                                                                                                                                                                              | -                                  | C_unihii_00074_mRNA_46.1    | -                             |
| GF0034503 | 0                               | 1                        | 0                          | Hypothetical protein (1)                                                    |                                                                                                                                                                                                                                              | -                                                                                                                                                                                                                                                                                                                                                                                                                                                                                                                                                                                                                                                                                                                              | -                                  | C_unihii_00074_mRNA_45.1    | -                             |
| GF0034502 | 0                               | 1                        | 0                          | Hypothetical protein (1)                                                    |                                                                                                                                                                                                                                              | -                                                                                                                                                                                                                                                                                                                                                                                                                                                                                                                                                                                                                                                                                                                              | -                                  | C_unihii_00074_mRNA_44.1    | -                             |
| GF0034501 | 0                               | 1                        | 0                          | Hypothetical protein (1)                                                    |                                                                                                                                                                                                                                              | -                                                                                                                                                                                                                                                                                                                                                                                                                                                                                                                                                                                                                                                                                                                              | -                                  | C_unihii_00074_mRNA_39.1    | -                             |
| GF0034500 | 0                               | 1                        | 0                          | Trichome birefringence-like protein (1)                                     |                                                                                                                                                                                                                                              | Trichome birefringence-like family [IPR02962] (1); PMRS N-terminal domain [IPR025416] (1); PC-esterase [IPR026057] (1)                                                                                                                                                                                                                                                                                                                                                                                                                                                                                                                                                                                                         | -                                  | C_unihii_00074_mRNA_15.1    | -                             |
| GF0034499 | 0                               | 1                        | 0                          | Hypothetical protein (1)                                                    |                                                                                                                                                                                                                                              | -                                                                                                                                                                                                                                                                                                                                                                                                                                                                                                                                                                                                                                                                                                                              | -                                  | C_unihii_00072_mRNA_57.1    | -                             |
| GF0034498 | 0                               | 1                        | 0                          | Hypothetical protein (1)                                                    | protein binding [GO:0005515] molecular_function (1)                                                                                                                                                                                          | Leucine-rich repeat [IPR016111] (1); Leucine-rich repeat domain, L domain-like [IPR032675] (1)                                                                                                                                                                                                                                                                                                                                                                                                                                                                                                                                                                                                                                 | -                                  | C_unihii_00072_mRNA_55.1    | -                             |
| GF0034497 | 0                               | 1                        | 0                          | Hypothetical protein (1)                                                    |                                                                                                                                                                                                                                              | -                                                                                                                                                                                                                                                                                                                                                                                                                                                                                                                                                                                                                                                                                                                              | -                                  | C_unihii_00072_mRNA_52.1    | -                             |
| GF0034496 | 0                               | 1                        | 0                          | Hypothetical protein (1)                                                    |                                                                                                                                                                                                                                              | Cytochrome c oxidase assembly protein PET191 [IPR018793] (1)                                                                                                                                                                                                                                                                                                                                                                                                                                                                                                                                                                                                                                                                   | -                                  | C_unihii_00072_mRNA_49.1    | -                             |
| GF0034495 | 0                               | 1                        | 0                          | P-type ATPase superfamily (1)                                               | integral component of membrane [GO:0016022] cellular_component (1); nucleotide binding [GO:0000166] molecular_function (1)                                                                                                                   | P-type ATPase phosphorylation site [IPR018303] (1); P-type ATPase [IPR001757] (1); P-type ATPase, cytoplasmic domain N [IPR023591] (1); HAD-like domain [IPR023214] (1)                                                                                                                                                                                                                                                                                                                                                                                                                                                                                                                                                        | -                                  | C_unihii_00072_mRNA_48.1    | -                             |
| GF0034494 | 0                               | 1                        | 0                          | Hypothetical protein (1)                                                    |                                                                                                                                                                                                                                              | -                                                                                                                                                                                                                                                                                                                                                                                                                                                                                                                                                                                                                                                                                                                              | -                                  | C_unihii_00072_mRNA_43.1    | -                             |
| GF0034493 | 0                               | 1                        | 0                          | Extension (1)                                                               |                                                                                                                                                                                                                                              | -                                                                                                                                                                                                                                                                                                                                                                                                                                                                                                                                                                                                                                                                                                                              | -                                  | C_unihii_00072_mRNA_42.1    | -                             |
| GF0034492 | 0                               | 1                        | 0                          | Extension (1)                                                               |                                                                                                                                                                                                                                              | -                                                                                                                                                                                                                                                                                                                                                                                                                                                                                                                                                                                                                                                                                                                              | -                                  | C_unihii_00072_mRNA_39.1    | -                             |
| GF0034491 | 0                               | 1                        | 0                          | Hypothetical protein (1)                                                    |                                                                                                                                                                                                                                              | -                                                                                                                                                                                                                                                                                                                                                                                                                                                                                                                                                                                                                                                                                                                              | -                                  | C_unihii_00072_mRNA_37.1    | -                             |
| GF0034490 | 0                               | 1                        | 0                          | Hypothetical protein (1)                                                    |                                                                                                                                                                                                                                              | Domain of unknown function DUF2431 [IPR019446] (1); S-adenosyl-L-methionine-dependent methyltransferase [IPR029633] (1)                                                                                                                                                                                                                                                                                                                                                                                                                                                                                                                                                                                                        | -                                  | C_unihii_00072_mRNA_33.1    | -                             |
| GF0034489 | 0                               | 1                        | 0                          | Hypothetical protein (1)                                                    |                                                                                                                                                                                                                                              | NAD(P)-binding domain [IPR016040] (1)                                                                                                                                                                                                                                                                                                                                                                                                                                                                                                                                                                                                                                                                                          | -                                  | C_unihii_00072_mRNA_3.1     | -                             |
| GF0034488 | 0                               | 1                        | 0                          | Hypothetical protein (1)                                                    |                                                                                                                                                                                                                                              | -                                                                                                                                                                                                                                                                                                                                                                                                                                                                                                                                                                                                                                                                                                                              | -                                  | C_unihii_00072_mRNA_20.1    | -                             |
| GF0034487 | 0                               | 1                        | 0                          | Hypothetical protein (1)                                                    |                                                                                                                                                                                                                                              | -                                                                                                                                                                                                                                                                                                                                                                                                                                                                                                                                                                                                                                                                                                                              | -                                  | C_unihii_00071_mRNA_48.1    | -                             |
| GF0034486 | 0                               | 1                        | 0                          | Hypothetical protein (1)                                                    |                                                                                                                                                                                                                                              | -                                                                                                                                                                                                                                                                                                                                                                                                                                                                                                                                                                                                                                                                                                                              | -                                  | C_unihii_00071_mRNA_47.1    | -                             |
| GF0034485 | 0                               | 1                        | 0                          | Hypothetical protein (1)                                                    | protein phosphorylation [GO:0006468] biological_process (1); protein kinase activity [GO:0004672] molecular_function (1); ATP binding [GO:0005524] molecular_function (1)                                                                    | Serine-threonine-tyrosine protein kinase, active site [IPR008271] (1); Serine/threonine/dual specificity protein kinase, catalytic domain [IPR002590] (1); Protein kinase-like domain [IPR011009] (1); Protein kinase domain [IPR000719] (1)                                                                                                                                                                                                                                                                                                                                                                                                                                                                                   | -                                  | C_unihii_00071_mRNA_45.1    | -                             |
| GF0034484 | 0                               | 1                        | 0                          | Hypothetical protein (1)                                                    |                                                                                                                                                                                                                                              | -                                                                                                                                                                                                                                                                                                                                                                                                                                                                                                                                                                                                                                                                                                                              | -                                  | C_unihii_00071_mRNA_44.1    | -                             |
| GF0034483 | 0                               | 1                        | 0                          | Hypothetical protein (1)                                                    |                                                                                                                                                                                                                                              | -                                                                                                                                                                                                                                                                                                                                                                                                                                                                                                                                                                                                                                                                                                                              | -                                  | C_unihii_00071_mRNA_43.1    | -                             |
| GF0034482 | 0                               | 1                        | 0                          | Hypothetical protein (1)                                                    |                                                                                                                                                                                                                                              | -                                                                                                                                                                                                                                                                                                                                                                                                                                                                                                                                                                                                                                                                                                                              | -                                  | C_unihii_00071_mRNA_40.1    | -                             |
| GF0034481 | 0                               | 1                        | 0                          | Hypothetical protein (1)                                                    |                                                                                                                                                                                                                                              | -                                                                                                                                                                                                                                                                                                                                                                                                                                                                                                                                                                                                                                                                                                                              | -                                  | C_unihii_00071_mRNA_15.1    | -                             |
| GF0034480 | 0                               | 1                        | 0                          | General transcription factor 2-related zinc finger protein (1)              | nucleic acid binding [GO:0003676] molecular_function (1)                                                                                                                                                                                     | Domain of unknown function DUF4371 [IPR025398] (1); Ribonuclease H-like domain [IPR023571] (1)                                                                                                                                                                                                                                                                                                                                                                                                                                                                                                                                                                                                                                 | -                                  | C_unihii_00070_mRNA_11.1    | -                             |
| GF0034479 | 0                               | 1                        | 0                          | Hypothetical protein (1)                                                    |                                                                                                                                                                                                                                              | Bull-type lectin domain [IPR014801] (1); S-leucin glycoprotein domain [IPR000858] (1); Serine/threonine/dual specificity protein kinase, catalytic domain [IPR002290] (1); IGF-like domain [IPR000742] (1); Protein kinase, ATP binding site [IPR017411] (1); S-leucin receptor kinase, C-terminal [IPR021820] (1); Serine/threonine-protein kinase, active site [IPR008271] (1); S-leucin receptor kinase [IPR021236] (1); Serine/threonine-tyrosine protein kinase catalytic domain [IPR001245] (1); Bull-type lectin domain [IPR001480] (1); PAN/Apple domain [IPR000469] (1); Protein kinase domain [IPR000719] (1); Concavalin A-like lectin glycanase domain [IPR013220] (1); Protein kinase-like domain [IPR011009] (1) | -                                  | C_unihii_00070_mRNA_49.1    | -                             |
| GF0034477 | 0                               | 1                        | 0                          | Anthocyanidin reductase (1)                                                 | catalytic activity [GO:0003824] molecular_function (1); coenzyme binding [GO:0050662] molecular_function (1)                                                                                                                                 | NAD(P)-binding domain [IPR016040] (1); NAD-dependent epimerase/dehydratase, N-terminal domain [IPR001509] (1)                                                                                                                                                                                                                                                                                                                                                                                                                                                                                                                                                                                                                  | -                                  | C_unihii_00070_mRNA_33.1    | -                             |
| GF0034476 | 0                               | 1                        | 0                          | DNA binding storage protein-related transcriptional regulator, putative (1) |                                                                                                                                                                                                                                              | Protein of unknown function DUF573 [IPR007592] (1)                                                                                                                                                                                                                                                                                                                                                                                                                                                                                                                                                                                                                                                                             | -                                  | C_unihii_00070_mRNA_30.1    | -                             |
| GF0034475 | 0                               | 1                        | 0                          | Hypothetical protein (1)                                                    |                                                                                                                                                                                                                                              | -                                                                                                                                                                                                                                                                                                                                                                                                                                                                                                                                                                                                                                                                                                                              | -                                  | C_unihii_00070_mRNA_21.1    | -                             |
| GF0034474 | 0                               | 1                        | 0                          | Cysteine-rich receptor-like protein kinase 25 (1)                           |                                                                                                                                                                                                                                              | Gak2 homologous domain [IPR002902] (1)                                                                                                                                                                                                                                                                                                                                                                                                                                                                                                                                                                                                                                                                                         | -                                  | C_unihii_00070_mRNA_20.1    | -                             |
| GF0034473 | 0                               | 1                        | 0                          | Cysteine-rich RLK 29 (1)                                                    | protein kinase activity [GO:0004672] molecular_function (1); protein phosphorylation [GO:0006468] biological_process (1); ATP binding [GO:0005524] molecular_function (1)                                                                    | Protein kinase domain [IPR000719] (1); Concavalin A-like lectin glycanase domain [IPR013220] (1); Protein kinase-like domain [IPR011009] (1); Serine/threonine/dual specificity protein kinase, catalytic domain [IPR002290] (1); Serine/threonine-protein kinase, active site [IPR008271] (1); Gak2 homologous domain [IPR002902] (1); Serine-threonine-tyrosine protein kinase catalytic domain [IPR001245] (1)                                                                                                                                                                                                                                                                                                              | -                                  | C_unihii_00070_mRNA_18.1    | -                             |
| GF0034472 | 0                               | 1                        | 0                          | Hypothetical protein (1)                                                    | membrane [GO:0016020] cellular_component (1); carbohydrate metabolic process [GO:0005975] biological_process (1)                                                                                                                             | Calcium-dependent channel, TTM region, putative phosphate [IPR001864] (1); ICFM putative phosphate transporter, cytosolic domain [IPR027815] (1); Glycosyl hydrolase superfamily [IPR017853] (1); Glycosyl hydrolase, catalytic domain [IPR013781] (1); Glycosyl hydrolase, family 13, alpha [IPR013780] (1); Calcium permeable stress-gated cation channel 1, N-terminal transmembrane domain [IPR025801] (1)                                                                                                                                                                                                                                                                                                                 | -                                  | C_unihii_00069_mRNA_53.1    | -                             |
| GF0034471 | 0                               | 1                        | 0                          | Hypothetical protein (1)                                                    | metal ion binding [GO:004872] molecular_function (1); metal ion transport [GO:0030081] biological_process (1); nucleic acid binding [GO:0003676] molecular_function (1)                                                                      | Heavy metal-associated domain, HMA [IPR006211] (1); Ribonuclease H-like domain [IPR025371] (1); Zinc finger, C2H2-type/integrase DNA-binding domain [IPR013087] (1); Zinc finger, C2H2 [IPR007087] (1)                                                                                                                                                                                                                                                                                                                                                                                                                                                                                                                         | -                                  | C_unihii_00069_mRNA_51.1    | -                             |
| GF0034470 | 0                               | 1                        | 0                          | Hypothetical protein (1)                                                    | peroxidase activity [GO:0004601] molecular_function (1); oxidation-reduction process [GO:005114] biological_process (1); heme binding [GO:0020337] molecular_function (1); response to oxidative stress [GO:0006979] biological_process (1)  | Hem peroxidase [IPR010255] (1); Hem peroxidase, plant/fungal/bacterial [IPR002016] (1)                                                                                                                                                                                                                                                                                                                                                                                                                                                                                                                                                                                                                                         | -                                  | C_unihii_00069_mRNA_5.1     | -                             |
| GF0034469 | 0                               | 1                        | 0                          | Hypothetical protein (1)                                                    |                                                                                                                                                                                                                                              | -                                                                                                                                                                                                                                                                                                                                                                                                                                                                                                                                                                                                                                                                                                                              | -                                  | C_unihii_00069_mRNA_41.1    | -                             |
| GF0034468 | 0                               | 1                        | 0                          | Hypothetical protein (1)                                                    |                                                                                                                                                                                                                                              | -                                                                                                                                                                                                                                                                                                                                                                                                                                                                                                                                                                                                                                                                                                                              | -                                  | C_unihii_00069_mRNA_27.1    | -                             |
| GF0034467 | 0                               | 1                        | 0                          | Hypothetical protein (1)                                                    |                                                                                                                                                                                                                                              | Major facilitator superfamily domain [IPR020846] (1)                                                                                                                                                                                                                                                                                                                                                                                                                                                                                                                                                                                                                                                                           | -                                  | C_unihii_00069_mRNA_23.1    | -                             |
| GF0034466 | 0                               | 1                        | 0                          | Histone H2A (1)                                                             | nucleosome [GO:0000786] cellular_component (1); protein heterodimerization activity [GO:0004692] molecular_function (1); nucleus [GO:0005634] cellular_component (1); DNA binding [GO:0003677] molecular_function (1)                        | Histone H2A/H2B/H3 [IPR007125] (1); Histone H2A, C-terminal domain [IPR025454] (1); Histone H2A [IPR009072] (1); Histone H2A [IPR002119] (1)                                                                                                                                                                                                                                                                                                                                                                                                                                                                                                                                                                                   | -                                  | C_unihii_00069_mRNA_11.1    | -                             |

| ID        | Num. in C. crottensteini | Num. in C. auris | Num. in P. putidus | Note                                                | GO                                                                                                                                                                                                                                                                                                                                                                                                                                                                                                                                           | InterPro                                                                                                                                                                                                                                                                                                                                                                                                         | Members in C. crottensteini | Members in C. auris      | Members in P. putidus |
|-----------|--------------------------|------------------|--------------------|-----------------------------------------------------|----------------------------------------------------------------------------------------------------------------------------------------------------------------------------------------------------------------------------------------------------------------------------------------------------------------------------------------------------------------------------------------------------------------------------------------------------------------------------------------------------------------------------------------------|------------------------------------------------------------------------------------------------------------------------------------------------------------------------------------------------------------------------------------------------------------------------------------------------------------------------------------------------------------------------------------------------------------------|-----------------------------|--------------------------|-----------------------|
| GF0034465 | 0                        | 1                | 0                  | Hypothetical protein (1)                            | nucleic acid binding [GO:0003676 molecular_function] (1)                                                                                                                                                                                                                                                                                                                                                                                                                                                                                     | Ribonuclease H-like domain [IPR012137] (1)                                                                                                                                                                                                                                                                                                                                                                       | -                           | C_unihis_00068_mRNA_45.1 | -                     |
| GF0034464 | 0                        | 1                | 0                  | Hypothetical protein (1)                            | methyltransferase activity [GO:0001618 molecular_function] (1)                                                                                                                                                                                                                                                                                                                                                                                                                                                                               | Bin3-type S-adenosyl-L-methionine binding domain [IPR024169] (1); RNA methyltransferase-like, C-terminal [IPR010675] (1); S-adenosyl-L-methionine-dependent methyltransferase [IPR029063] (1)                                                                                                                                                                                                                    | -                           | C_unihis_00068_mRNA_29.1 | -                     |
| GF0034463 | 0                        | 1                | 0                  | Hypothetical protein (1)                            | catalytic activity [GO:0003824 molecular_function] (1); carbohydrate metabolic process [GO:0005975 biological_process] (1); alpha-amylase activity [GO:0004556 molecular_function] (1); cation binding [GO:0043169 molecular_function] (1); calcium ion binding [GO:0005509 molecular_function] (1)                                                                                                                                                                                                                                          | Glycosyl hydrolase, family 13, all-beta [IPR013769] (1); Glycoside hydrolase catalytic domain [IPR013781] (1); Glycosyl hydrolase, family 13, catalytic domain [IPR006647] (1); Glycosyl hydrolase, family 13, subfamily, catalytic domain [IPR006599] (1); Glycosyl hydrolase superfamily [IPR017853] (1); Glycoside hydrolase, family 13 [IPR015922] (1); Alpha-amylase, C-terminal beta-sheet [IPR012850] (1) | -                           | C_unihis_00068_mRNA_16.1 | -                     |
| GF0034462 | 0                        | 1                | 0                  | Alpha-amylase type B isozyme (1)                    | transporter activity [GO:0005215 molecular_function] (1); transport [GO:0006110 biological_process] (1); membrane [GO:0016020 cellular_component] (1)                                                                                                                                                                                                                                                                                                                                                                                        | Proton-dependent oligopeptide transporter family [IPR008109] (1)                                                                                                                                                                                                                                                                                                                                                 | -                           | C_unihis_00067_mRNA_58.1 | -                     |
| GF0034461 | 0                        | 1                | 0                  | Hypothetical protein (1)                            | membrane [GO:0016020 cellular_component] (1); transport [GO:0006110 biological_process] (1); potassium ion transmembrane transport [GO:0071805 biological_process] (1); potassium ion transmembrane transporter activity [GO:0015079 molecular_function] (1); transporter activity [GO:0005215 molecular_function] (1)                                                                                                                                                                                                                       | Proton-dependent oligopeptide transporter family [IPR008109] (1); Potassium transporter [IPR038555] (1)                                                                                                                                                                                                                                                                                                          | -                           | C_unihis_00067_mRNA_57.1 | -                     |
| GF0034459 | 0                        | 1                | 0                  | UDP-glucose fructosyl 3-O-glucosyltransferase 7 (1) | transferase activity, transferring hexosyl group [GO:0016758 molecular_function] (1); metabolic process [GO:0008152 biological_process] (1)                                                                                                                                                                                                                                                                                                                                                                                                  | Tudor domain [IPR020999] (1); UDP-glucuronosyl/UDP-glucosyltransferase [IPR002213] (1)                                                                                                                                                                                                                                                                                                                           | -                           | C_unihis_00067_mRNA_48.1 | -                     |
| GF0034458 | 0                        | 1                | 0                  | Hypothetical protein (1)                            | oxidation-reduction process [GO:0055114 biological_process] (1); peroxidase activity [GO:0004801 molecular_function] (1); heme binding [GO:0020037 molecular_function] (1); response to oxidative stress [GO:0006979 biological_process] (1)                                                                                                                                                                                                                                                                                                 | Hem peroxidase [IPR010255] (1); Plant peroxidase [IPR008023] (1); Prolamin-like domain [IPR008082] (1); Hem peroxidase, plant/fungal/bacterial [IPR02016] (1)                                                                                                                                                                                                                                                    | -                           | C_unihis_00067_mRNA_30.1 | -                     |
| GF0034457 | 0                        | 1                | 0                  | Hypothetical protein (1)                            | protein binding [GO:0005515 molecular_function] (1)                                                                                                                                                                                                                                                                                                                                                                                                                                                                                          | Ankyrin repeat-containing domain [IPR020683] (1); Ankyrin repeat [IPR02110] (1)                                                                                                                                                                                                                                                                                                                                  | -                           | C_unihis_00067_mRNA_24.1 | -                     |
| GF0034456 | 0                        | 1                | 0                  | Hypothetical protein (1)                            | -                                                                                                                                                                                                                                                                                                                                                                                                                                                                                                                                            | -                                                                                                                                                                                                                                                                                                                                                                                                                | -                           | C_unihis_00066_mRNA_88.1 | -                     |
| GF0034455 | 0                        | 1                | 0                  | Hypothetical protein (1)                            | -                                                                                                                                                                                                                                                                                                                                                                                                                                                                                                                                            | -                                                                                                                                                                                                                                                                                                                                                                                                                | -                           | C_unihis_00066_mRNA_87.1 | -                     |
| GF0034454 | 0                        | 1                | 0                  | Hypothetical protein (1)                            | -                                                                                                                                                                                                                                                                                                                                                                                                                                                                                                                                            | -                                                                                                                                                                                                                                                                                                                                                                                                                | -                           | C_unihis_00066_mRNA_86.1 | -                     |
| GF0034453 | 0                        | 1                | 0                  | Hypothetical protein (1)                            | -                                                                                                                                                                                                                                                                                                                                                                                                                                                                                                                                            | -                                                                                                                                                                                                                                                                                                                                                                                                                | -                           | C_unihis_00066_mRNA_85.1 | -                     |
| GF0034452 | 0                        | 1                | 0                  | Hypothetical protein (1)                            | -                                                                                                                                                                                                                                                                                                                                                                                                                                                                                                                                            | -                                                                                                                                                                                                                                                                                                                                                                                                                | -                           | C_unihis_00066_mRNA_84.1 | -                     |
| GF0034451 | 0                        | 1                | 0                  | Hypothetical protein (1)                            | -                                                                                                                                                                                                                                                                                                                                                                                                                                                                                                                                            | -                                                                                                                                                                                                                                                                                                                                                                                                                | -                           | C_unihis_00066_mRNA_83.1 | -                     |
| GF0034450 | 0                        | 1                | 0                  | Hypothetical protein (1)                            | -                                                                                                                                                                                                                                                                                                                                                                                                                                                                                                                                            | -                                                                                                                                                                                                                                                                                                                                                                                                                | -                           | C_unihis_00066_mRNA_82.1 | -                     |
| GF0034449 | 0                        | 1                | 0                  | Hypothetical protein (1)                            | nucleic acid binding [GO:0003676 molecular_function] (1); ATP binding [GO:0005524 molecular_function] (1)                                                                                                                                                                                                                                                                                                                                                                                                                                    | Helicase, C-terminal [IPR01650] (1); P-loop containing nucleoside triphosphate hydrolase [IPR027471] (1); ATP-dependent RNA helicase DEAD-box, conserved site [IPR00629] (1); DEAD/DEAF1 box helicase domain [IPR011545] (1); Helicase superfamily 1.2, ATP-binding domain [IPR014001] (1); RNA helicase, DEAD-box type, Q motif [IPR014014] (1)                                                                 | -                           | C_unihis_00066_mRNA_57.1 | -                     |
| GF0034448 | 0                        | 1                | 0                  | Hypothetical protein (1)                            | -                                                                                                                                                                                                                                                                                                                                                                                                                                                                                                                                            | -                                                                                                                                                                                                                                                                                                                                                                                                                | -                           | C_unihis_00066_mRNA_42.1 | -                     |
| GF0034447 | 0                        | 1                | 0                  | Hypothetical protein (1)                            | sucrose metabolic process [GO:0005985 biological_process] (1); sucrose synthase activity [GO:0016157 molecular_function] (1)                                                                                                                                                                                                                                                                                                                                                                                                                 | Exonuclease-like [IPR004263] (1); Sucrose-phosphate synthase [IPR006380] (1); Sucrose synthase [IPR006388] (1)                                                                                                                                                                                                                                                                                                   | -                           | C_unihis_00066_mRNA_39.1 | -                     |
| GF0034446 | 0                        | 1                | 0                  | Actin-related protein 2/3 complex subunit 3 (1)     | Arp2/3 protein complex [GO:0005885 cellular_component] (1); Actin-mediated actin nucleation [GO:0034134 biological_process] (1); regulation of actin filament polymerization [GO:0039833 biological_process] (1); cytoskeleton [GO:0005556 cellular_component] (1)                                                                                                                                                                                                                                                                           | Actin-related protein 2/3 complex subunit 3 [IPR007294] (1)                                                                                                                                                                                                                                                                                                                                                      | -                           | C_unihis_00066_mRNA_29.1 | -                     |
| GF0034445 | 0                        | 1                | 0                  | Hypothetical protein (1)                            | -                                                                                                                                                                                                                                                                                                                                                                                                                                                                                                                                            | -                                                                                                                                                                                                                                                                                                                                                                                                                | -                           | C_unihis_00066_mRNA_21.1 | -                     |
| GF0034444 | 0                        | 1                | 0                  | Hypothetical protein (1)                            | -                                                                                                                                                                                                                                                                                                                                                                                                                                                                                                                                            | -                                                                                                                                                                                                                                                                                                                                                                                                                | -                           | C_unihis_00065_mRNA_75.1 | -                     |
| GF0034443 | 0                        | 1                | 0                  | Hypothetical protein (1)                            | catalytic activity [GO:0003824 molecular_function] (1); metabolic process [GO:0008152 biological_process] (1)                                                                                                                                                                                                                                                                                                                                                                                                                                | Thiolase-like [IPR016039] (1); Beta-ketocofyl synthase, N-terminal [IPR014030] (1)                                                                                                                                                                                                                                                                                                                               | -                           | C_unihis_00065_mRNA_61.1 | -                     |
| GF0034442 | 0                        | 1                | 0                  | Hypothetical protein (1)                            | catalytic activity [GO:0003824 molecular_function] (1); oxidoreductase activity [GO:0016481 molecular_function] (1)                                                                                                                                                                                                                                                                                                                                                                                                                          | Alkylase-type TIM barrel [IPR015785] (1); FMN-dependent glyoxylase [IPR00062] (1)                                                                                                                                                                                                                                                                                                                                | -                           | C_unihis_00065_mRNA_59.1 | -                     |
| GF0034441 | 0                        | 1                | 0                  | Hypothetical protein (1)                            | metabolic process [GO:0008152 biological_process] (1); catalytic activity [GO:0003824 molecular_function] (1)                                                                                                                                                                                                                                                                                                                                                                                                                                | Beta-ketocofyl synthase, N-terminal [IPR014030] (1); Beta-ketocofyl synthase, active site [IPR018201] (1); Thiolase-like [IPR016039] (1)                                                                                                                                                                                                                                                                         | -                           | C_unihis_00065_mRNA_51.1 | -                     |
| GF0034439 | 0                        | 1                | 0                  | Hypothetical protein (1)                            | -                                                                                                                                                                                                                                                                                                                                                                                                                                                                                                                                            | -                                                                                                                                                                                                                                                                                                                                                                                                                | -                           | C_unihis_00065_mRNA_47.1 | -                     |
| GF0034438 | 0                        | 1                | 0                  | Hypothetical protein (1)                            | -                                                                                                                                                                                                                                                                                                                                                                                                                                                                                                                                            | -                                                                                                                                                                                                                                                                                                                                                                                                                | -                           | C_unihis_00065_mRNA_46.1 | -                     |
| GF0034437 | 0                        | 1                | 0                  | Hypothetical protein (1)                            | -                                                                                                                                                                                                                                                                                                                                                                                                                                                                                                                                            | -                                                                                                                                                                                                                                                                                                                                                                                                                | -                           | C_unihis_00065_mRNA_45.1 | -                     |
| GF0034436 | 0                        | 1                | 0                  | Hypothetical protein (1)                            | -                                                                                                                                                                                                                                                                                                                                                                                                                                                                                                                                            | -                                                                                                                                                                                                                                                                                                                                                                                                                | -                           | C_unihis_00065_mRNA_43.1 | -                     |
| GF0034435 | 0                        | 1                | 0                  | Hypothetical protein (1)                            | -                                                                                                                                                                                                                                                                                                                                                                                                                                                                                                                                            | -                                                                                                                                                                                                                                                                                                                                                                                                                | -                           | C_unihis_00065_mRNA_42.1 | -                     |
| GF0034434 | 0                        | 1                | 0                  | Hypothetical protein (1)                            | -                                                                                                                                                                                                                                                                                                                                                                                                                                                                                                                                            | -                                                                                                                                                                                                                                                                                                                                                                                                                | -                           | C_unihis_00065_mRNA_41.1 | -                     |
| GF0034433 | 0                        | 1                | 0                  | Hypothetical protein (1)                            | -                                                                                                                                                                                                                                                                                                                                                                                                                                                                                                                                            | -                                                                                                                                                                                                                                                                                                                                                                                                                | -                           | C_unihis_00065_mRNA_31.1 | -                     |
| GF0034432 | 0                        | 1                | 0                  | Hypothetical protein (1)                            | oxidoreductase activity, acting on single donors with incorporation of molecular oxygen, incorporation of two atoms of oxygen [GO:0016762 molecular_function] (1); oxidoreductase activity, acting on paired donors, with incorporation or reduction of molecular oxygen [GO:0016765 molecular_function] (1); oxidation-reduction process [GO:0005514 biological_process] (1); heme binding [GO:0020037 molecular_function] (1); iron ion binding [GO:0005506 molecular_function] (1); metal ion binding [GO:0046872 molecular_function] (1) | Lipoxygenase, domain 3 [IPR027433] (1); Lipoxygenase [IPR00907] (1); Cyclooxygenase P450 [IPR001126] (1); Lipoxygenase, C-terminal [IPR013819] (1)                                                                                                                                                                                                                                                               | -                           | C_unihis_00065_mRNA_17.1 | -                     |
| GF0034431 | 0                        | 1                | 0                  | Kinase 1B (1)                                       | ATP binding [GO:0005524 molecular_function] (1); protein phosphatases [GO:0006466 biological_process] (1); protein kinase activity [GO:0004672 molecular_function] (1)                                                                                                                                                                                                                                                                                                                                                                       | Protein kinase domain [IPR00719] (1); Consensus/A-like actin/ghrelin domain [IPR013220] (1); Protein kinase-like domain [IPR011099] (1); Protein kinase, ATP binding site [IPR017441] (1); Serine-threonine/tyrosine-protein kinase catalytic domain [IPR01245] (1); Protein kinase-like domain [IPR011099] (1)                                                                                                  | -                           | C_unihis_00064_mRNA_10.1 | -                     |
| GF0034430 | 0                        | 1                | 0                  | Hypothetical protein (1)                            | -                                                                                                                                                                                                                                                                                                                                                                                                                                                                                                                                            | -                                                                                                                                                                                                                                                                                                                                                                                                                | -                           | C_unihis_00064_mRNA_68.1 | -                     |
| GF0034429 | 0                        | 1                | 0                  | Hypothetical protein (1)                            | protein binding [GO:0005515 molecular_function] (1)                                                                                                                                                                                                                                                                                                                                                                                                                                                                                          | Leucine-rich repeat [IPR01611] (1); Leucine-rich repeat domain, I domain-like [IPR02675] (1)                                                                                                                                                                                                                                                                                                                     | -                           | C_unihis_00064_mRNA_65.1 | -                     |
| GF0034428 | 0                        | 1                | 0                  | Hypothetical protein (1)                            | -                                                                                                                                                                                                                                                                                                                                                                                                                                                                                                                                            | -                                                                                                                                                                                                                                                                                                                                                                                                                | -                           | C_unihis_00064_mRNA_64.1 | -                     |
| GF0034427 | 0                        | 1                | 0                  | Hypothetical protein (1)                            | -                                                                                                                                                                                                                                                                                                                                                                                                                                                                                                                                            | -                                                                                                                                                                                                                                                                                                                                                                                                                | -                           | C_unihis_00064_mRNA_63.1 | -                     |
| GF0034426 | 0                        | 1                | 0                  | Hypothetical protein (1)                            | polysaccharide binding [GO:0030247 molecular_function] (1)                                                                                                                                                                                                                                                                                                                                                                                                                                                                                   | Wall-associated receptor kinase, galacturonin-binding domain [IPR029271] (1)                                                                                                                                                                                                                                                                                                                                     | -                           | C_unihis_00064_mRNA_62.1 | -                     |
| GF0034425 | 0                        | 1                | 0                  | Hypothetical protein (1)                            | methyltransferase activity [GO:0001618 molecular_function] (1)                                                                                                                                                                                                                                                                                                                                                                                                                                                                               | methytransferase [IPR005299] (1); S-adenosyl-L-methionine-dependent methyltransferase [IPR029063] (1)                                                                                                                                                                                                                                                                                                            | -                           | C_unihis_00064_mRNA_42.1 | -                     |
| GF0034424 | 0                        | 1                | 0                  | Repressor of RNA polymerase III transcription (1)   | negative regulation of transcription from RNA polymerase III promoter [GO:0016480 biological_process] (1)                                                                                                                                                                                                                                                                                                                                                                                                                                    | Repressor of RNA polymerase III transcription Mat1 [IPR015277] (1)                                                                                                                                                                                                                                                                                                                                               | -                           | C_unihis_00064_mRNA_37.1 | -                     |
| GF0034423 | 0                        | 1                | 0                  | Hypothetical protein (1)                            | -                                                                                                                                                                                                                                                                                                                                                                                                                                                                                                                                            | -                                                                                                                                                                                                                                                                                                                                                                                                                | -                           | C_unihis_00064_mRNA_36.1 | -                     |
| GF0034422 | 0                        | 1                | 0                  | Hypothetical protein (1)                            | -                                                                                                                                                                                                                                                                                                                                                                                                                                                                                                                                            | -                                                                                                                                                                                                                                                                                                                                                                                                                | -                           | C_unihis_00064_mRNA_34.1 | -                     |
| GF0034421 | 0                        | 1                | 0                  | Hypothetical protein (1)                            | sequence-specific DNA binding [GO:0043365 molecular_function] (1); regulation of transcription, DNA-templated [GO:0006355 biological_process] (1); transcription factor activity, sequence-specific DNA binding [GO:0003700 molecular_function] (1)                                                                                                                                                                                                                                                                                          | 5'-3' exoribonuclease [IPR027073] (1); Domain of unknown function DUF1985 [IPR015410] (1)                                                                                                                                                                                                                                                                                                                        | -                           | C_unihis_00064_mRNA_34.1 | -                     |
| GF0034420 | 0                        | 1                | 0                  | Hypothetical protein (1)                            | -                                                                                                                                                                                                                                                                                                                                                                                                                                                                                                                                            | -                                                                                                                                                                                                                                                                                                                                                                                                                | -                           | C_unihis_00063_mRNA_50.1 | -                     |
| GF0034419 | 0                        | 1                | 0                  | Hypothetical protein (1)                            | -                                                                                                                                                                                                                                                                                                                                                                                                                                                                                                                                            | -                                                                                                                                                                                                                                                                                                                                                                                                                | -                           | C_unihis_00063_mRNA_51.1 | -                     |
| GF0034418 | 0                        | 1                | 0                  | Hypothetical protein (1)                            | -                                                                                                                                                                                                                                                                                                                                                                                                                                                                                                                                            | -                                                                                                                                                                                                                                                                                                                                                                                                                | -                           | C_unihis_00063_mRNA_48.1 | -                     |
| GF0034417 | 0                        | 1                | 0                  | Hypothetical protein (1)                            | -                                                                                                                                                                                                                                                                                                                                                                                                                                                                                                                                            | -                                                                                                                                                                                                                                                                                                                                                                                                                | -                           | C_unihis_00063_mRNA_41.1 | -                     |
| GF0034416 | 0                        | 1                | 0                  | Hypothetical protein (1)                            | -                                                                                                                                                                                                                                                                                                                                                                                                                                                                                                                                            | -                                                                                                                                                                                                                                                                                                                                                                                                                | -                           | C_unihis_00063_mRNA_27.1 | -                     |
| GF0034415 | 0                        | 1                | 0                  | Hypothetical protein (1)                            | -                                                                                                                                                                                                                                                                                                                                                                                                                                                                                                                                            | -                                                                                                                                                                                                                                                                                                                                                                                                                | -                           | C_unihis_00063_mRNA_25.1 | -                     |
| GF0034414 | 0                        | 1                | 0                  | Hypothetical protein (1)                            | -                                                                                                                                                                                                                                                                                                                                                                                                                                                                                                                                            | -                                                                                                                                                                                                                                                                                                                                                                                                                | -                           | C_unihis_00063_mRNA_23.1 | -                     |
| GF0034413 | 0                        | 1                | 0                  | Hypothetical protein (1)                            | -                                                                                                                                                                                                                                                                                                                                                                                                                                                                                                                                            | -                                                                                                                                                                                                                                                                                                                                                                                                                | -                           | C_unihis_00063_mRNA_21.1 | -                     |
| GF0034412 | 0                        | 1                | 0                  | Hypothetical protein (1)                            | -                                                                                                                                                                                                                                                                                                                                                                                                                                                                                                                                            | -                                                                                                                                                                                                                                                                                                                                                                                                                | -                           | C_unihis_00063_mRNA_15.1 | -                     |
| GF0034411 | 0                        | 1                | 0                  | Hypothetical protein (1)                            | -                                                                                                                                                                                                                                                                                                                                                                                                                                                                                                                                            | -                                                                                                                                                                                                                                                                                                                                                                                                                | -                           | C_unihis_00063_mRNA_1.1  | -                     |



| ID        | Num. in <i>C. glutinosa</i> | Num. in <i>C. canadensis</i> | Num. in <i>P. trifidatus</i> | Name                                                                   | GO                                                                                                                                                                                                                                                                                                                                                     | InterPro                                                                                                                                                                                                                                                                                                                    | Members in <i>C. glutinosa</i> | Members in <i>C. canadensis</i> | Members in <i>P. trifidatus</i> |
|-----------|-----------------------------|------------------------------|------------------------------|------------------------------------------------------------------------|--------------------------------------------------------------------------------------------------------------------------------------------------------------------------------------------------------------------------------------------------------------------------------------------------------------------------------------------------------|-----------------------------------------------------------------------------------------------------------------------------------------------------------------------------------------------------------------------------------------------------------------------------------------------------------------------------|--------------------------------|---------------------------------|---------------------------------|
| GF0034410 | 0                           | 1                            | 1                            | 0 Hypothetical protein (1)                                             |                                                                                                                                                                                                                                                                                                                                                        |                                                                                                                                                                                                                                                                                                                             |                                | C_unihit_00062_mRNA_52.1        |                                 |
| GF0034409 | 0                           | 1                            | 1                            | 0 Hypothetical protein (1)                                             | regulation of transcription, DNA-templated [GO:0006355]                                                                                                                                                                                                                                                                                                | FHY3FARI family [IPR011052] (1)                                                                                                                                                                                                                                                                                             |                                | C_unihit_00062_mRNA_34.1        |                                 |
| GF0034408 | 0                           | 1                            | 1                            | 0 Hypothetical protein (1)                                             |                                                                                                                                                                                                                                                                                                                                                        |                                                                                                                                                                                                                                                                                                                             |                                | C_unihit_00062_mRNA_18.1        |                                 |
| GF0034407 | 0                           | 1                            | 1                            | 0 Hypothetical protein (1)                                             |                                                                                                                                                                                                                                                                                                                                                        |                                                                                                                                                                                                                                                                                                                             |                                | C_unihit_00062_mRNA_17.1        |                                 |
| GF0034406 | 0                           | 1                            | 1                            | 0 Hypothetical protein (1)                                             |                                                                                                                                                                                                                                                                                                                                                        |                                                                                                                                                                                                                                                                                                                             |                                | C_unihit_00062_mRNA_12.1        |                                 |
| GF0034405 | 0                           | 1                            | 1                            | 0 Hypothetical protein (1)                                             |                                                                                                                                                                                                                                                                                                                                                        |                                                                                                                                                                                                                                                                                                                             |                                | C_unihit_00062_mRNA_11.1        |                                 |
| GF0034404 | 0                           | 1                            | 1                            | 0 Hypothetical protein (1)                                             |                                                                                                                                                                                                                                                                                                                                                        |                                                                                                                                                                                                                                                                                                                             |                                | C_unihit_00061_mRNA_67.1        |                                 |
| GF0034403 | 0                           | 1                            | 1                            | 0 Hypothetical protein (1)                                             |                                                                                                                                                                                                                                                                                                                                                        |                                                                                                                                                                                                                                                                                                                             |                                | C_unihit_00061_mRNA_60.1        |                                 |
| GF0034402 | 0                           | 1                            | 1                            | 0 Hypothetical protein (1)                                             |                                                                                                                                                                                                                                                                                                                                                        |                                                                                                                                                                                                                                                                                                                             |                                | C_unihit_00061_mRNA_57.1        |                                 |
| GF0034401 | 0                           | 1                            | 1                            | 0 Hypothetical protein (1)                                             |                                                                                                                                                                                                                                                                                                                                                        |                                                                                                                                                                                                                                                                                                                             |                                | C_unihit_00061_mRNA_56.1        |                                 |
| GF0034400 | 0                           | 1                            | 1                            | 0 Hypothetical protein (1)                                             |                                                                                                                                                                                                                                                                                                                                                        |                                                                                                                                                                                                                                                                                                                             |                                | C_unihit_00061_mRNA_53.1        |                                 |
| GF0034399 | 0                           | 1                            | 1                            | 0 Hypothetical protein (1)                                             |                                                                                                                                                                                                                                                                                                                                                        |                                                                                                                                                                                                                                                                                                                             |                                | C_unihit_00061_mRNA_52.1        |                                 |
| GF0034398 | 0                           | 1                            | 1                            | 0 Neutral alpha-glucosidase (1)                                        | hydrolase activity, hydrolyzing O-glycosyl compounds [GO:0004455]<br>molecular function (1); catalytic activity [GO:0003824 molecular_function] (1); carbohydrate metabolic process [GO:0005975 biological_process] (1); carbohydrate binding [GO:0030246 molecular_function] (1)                                                                      | Glycoside hydrolase family 31<br>[IPR000322] (1); Glycosyl hydrolase family 31, active site [IPR030458] (1); Alkhalase-type TIM barrel [IPR013785] (1); Galactose mutarotase-like domain [IPR011031] (1); Glycoside hydrolase superfamily [IPR013853] (1); Glycoside hydrolase family 31, N-terminal domain [IPR025887] (1) |                                | C_unihit_00061_mRNA_44.1        |                                 |
| GF0034397 | 0                           | 1                            | 1                            | 0 Hypothetical protein (1)                                             |                                                                                                                                                                                                                                                                                                                                                        |                                                                                                                                                                                                                                                                                                                             |                                | C_unihit_00061_mRNA_41.1        |                                 |
| GF0034396 | 0                           | 1                            | 1                            | 0 Hypothetical protein (1)                                             |                                                                                                                                                                                                                                                                                                                                                        |                                                                                                                                                                                                                                                                                                                             |                                | C_unihit_00061_mRNA_38.1        |                                 |
| GF0034395 | 0                           | 1                            | 1                            | 0 Hypothetical protein (1)                                             |                                                                                                                                                                                                                                                                                                                                                        |                                                                                                                                                                                                                                                                                                                             |                                | C_unihit_00061_mRNA_37.1        |                                 |
| GF0034394 | 0                           | 1                            | 1                            | 0 Hypothetical protein (1)                                             |                                                                                                                                                                                                                                                                                                                                                        |                                                                                                                                                                                                                                                                                                                             |                                | C_unihit_00061_mRNA_29.1        |                                 |
| GF0034393 | 0                           | 1                            | 1                            | 0 Hypothetical protein (1)                                             |                                                                                                                                                                                                                                                                                                                                                        |                                                                                                                                                                                                                                                                                                                             |                                | C_unihit_00061_mRNA_23.1        |                                 |
| GF0034392 | 0                           | 1                            | 1                            | 0 RNA-directed DNA polymerase (Reverse transcriptase) (1)              |                                                                                                                                                                                                                                                                                                                                                        | Reverse transcriptase domain [IPR004771] (1)                                                                                                                                                                                                                                                                                |                                | C_unihit_00061_mRNA_21.1        |                                 |
| GF0034391 | 0                           | 1                            | 1                            | 0 Hypothetical protein (1)                                             |                                                                                                                                                                                                                                                                                                                                                        |                                                                                                                                                                                                                                                                                                                             |                                | C_unihit_00061_mRNA_10.1        |                                 |
| GF0034390 | 0                           | 1                            | 1                            | 0 Hypothetical protein (1)                                             |                                                                                                                                                                                                                                                                                                                                                        |                                                                                                                                                                                                                                                                                                                             |                                | C_unihit_00060_mRNA_61.1        |                                 |
| GF0034389 | 0                           | 1                            | 1                            | 0 Hypothetical protein (1)                                             |                                                                                                                                                                                                                                                                                                                                                        |                                                                                                                                                                                                                                                                                                                             |                                | C_unihit_00060_mRNA_58.1        |                                 |
| GF0034388 | 0                           | 1                            | 1                            | 0 Hypothetical protein (1)                                             |                                                                                                                                                                                                                                                                                                                                                        |                                                                                                                                                                                                                                                                                                                             |                                | C_unihit_00060_mRNA_57.1        |                                 |
| GF0034387 | 0                           | 1                            | 1                            | 0 Hypothetical protein (1)                                             | proteolysis [GO:0006508]<br>biological process (1); aspartic-type endopeptidase activity [GO:0004190 molecular_function] (1)                                                                                                                                                                                                                           | Aspartic peptidase, active site [IPR001960] (1)                                                                                                                                                                                                                                                                             |                                | C_unihit_00060_mRNA_55.1        |                                 |
| GF0034386 | 0                           | 1                            | 1                            | 0 Hypothetical protein (1)                                             |                                                                                                                                                                                                                                                                                                                                                        |                                                                                                                                                                                                                                                                                                                             |                                | C_unihit_00060_mRNA_47.1        |                                 |
| GF0034385 | 0                           | 1                            | 1                            | 0 Gag protease polyprotein (1)                                         |                                                                                                                                                                                                                                                                                                                                                        | Leucine-rich repeat domain, L domain-like [IPR012675] (1)<br>Retroviral gag domain [IPR005211] (1)                                                                                                                                                                                                                          |                                | C_unihit_00060_mRNA_46.1        |                                 |
| GF0034384 | 0                           | 1                            | 1                            | 0 Cc-ohase resistance protein, putative isoform 4 (1)                  |                                                                                                                                                                                                                                                                                                                                                        | DNA (cytosine 5)-methyltransferase 1, replication hci domain [IPR022702] (1); Leucine-rich repeat domain, L domain-like [IPR012675] (1)                                                                                                                                                                                     |                                | C_unihit_00060_mRNA_34.1        |                                 |
| GF0034383 | 0                           | 1                            | 1                            | 0 Hypothetical protein (1)                                             | nucleic acid binding [GO:0003676 molecular_function] (1)                                                                                                                                                                                                                                                                                               | Ribonuclease H-like domain [IPR012337] (1)                                                                                                                                                                                                                                                                                  |                                | C_unihit_00060_mRNA_30.1        |                                 |
| GF0034382 | 0                           | 1                            | 1                            | 0 Hypothetical protein (1)                                             |                                                                                                                                                                                                                                                                                                                                                        |                                                                                                                                                                                                                                                                                                                             |                                | C_unihit_00060_mRNA_29.1        |                                 |
| GF0034381 | 0                           | 1                            | 1                            | 0 Hypothetical protein (1)                                             | protein binding [GO:0005515 molecular_function] (1)                                                                                                                                                                                                                                                                                                    | F-box domain [IPR001810] (1)                                                                                                                                                                                                                                                                                                |                                | C_unihit_00060_mRNA_24.1        |                                 |
| GF0034380 | 0                           | 1                            | 1                            | 0 Hypothetical protein (1)                                             |                                                                                                                                                                                                                                                                                                                                                        |                                                                                                                                                                                                                                                                                                                             |                                | C_unihit_00060_mRNA_18.1        |                                 |
| GF0034379 | 0                           | 1                            | 1                            | 0 Hypothetical protein (1)                                             |                                                                                                                                                                                                                                                                                                                                                        |                                                                                                                                                                                                                                                                                                                             |                                | C_unihit_00060_mRNA_15.1        |                                 |
| GF0034378 | 0                           | 1                            | 1                            | 0 Hypothetical protein (1)                                             |                                                                                                                                                                                                                                                                                                                                                        |                                                                                                                                                                                                                                                                                                                             |                                | C_unihit_00060_mRNA_1.1         |                                 |
| GF0034377 | 0                           | 1                            | 1                            | 0 Hypothetical protein (1)                                             |                                                                                                                                                                                                                                                                                                                                                        |                                                                                                                                                                                                                                                                                                                             |                                | C_unihit_00059_mRNA_9.1         |                                 |
| GF0034376 | 0                           | 1                            | 1                            | 0 Hypothetical protein (1)                                             | protein kinase activity [GO:0004672 molecular_function] (1); protein phosphorylation [GO:0006468 biological_process] (1); ATP binding [GO:0005524 molecular_function] (1)                                                                                                                                                                              | Protein kinase-like domain [IPR011009] (1); Protein kinase domain [IPR000719] (1)                                                                                                                                                                                                                                           |                                | C_unihit_00059_mRNA_55.1        |                                 |
| GF0034375 | 0                           | 1                            | 1                            | 0 Hypothetical protein (1)                                             |                                                                                                                                                                                                                                                                                                                                                        |                                                                                                                                                                                                                                                                                                                             |                                | C_unihit_00059_mRNA_46.1        |                                 |
| GF0034374 | 0                           | 1                            | 1                            | 0 Hypothetical protein (1)                                             |                                                                                                                                                                                                                                                                                                                                                        | Reverse transcriptase zinc-binding domain [IPR026960] (1)                                                                                                                                                                                                                                                                   |                                | C_unihit_00059_mRNA_44.1        |                                 |
| GF0034373 | 0                           | 1                            | 1                            | 0 Retrotransposon protein, putative, Ty3-gypsy subclass, expressed (1) |                                                                                                                                                                                                                                                                                                                                                        | Aspartic peptidase domain [IPR021109] (1)                                                                                                                                                                                                                                                                                   |                                | C_unihit_00059_mRNA_32.1        |                                 |
| GF0034372 | 0                           | 1                            | 1                            | 0 Hypothetical protein (1)                                             |                                                                                                                                                                                                                                                                                                                                                        |                                                                                                                                                                                                                                                                                                                             |                                | C_unihit_00058_mRNA_6.1         |                                 |
| GF0034371 | 0                           | 1                            | 1                            | 0 Hypothetical protein (1)                                             |                                                                                                                                                                                                                                                                                                                                                        |                                                                                                                                                                                                                                                                                                                             |                                | C_unihit_00058_mRNA_59.1        |                                 |
| GF0034370 | 0                           | 1                            | 1                            | 0 Hypothetical protein (1)                                             |                                                                                                                                                                                                                                                                                                                                                        | Histone deacetylase domain [IPR022801] (1); Histone deacetylase superfamily [IPR002862] (1)                                                                                                                                                                                                                                 |                                | C_unihit_00058_mRNA_35.1        |                                 |
| GF0034369 | 0                           | 1                            | 1                            | 0 Hypothetical protein (1)                                             |                                                                                                                                                                                                                                                                                                                                                        | Histone deacetylase domain [IPR022801] (1); Histone deacetylase superfamily [IPR002862] (1)                                                                                                                                                                                                                                 |                                | C_unihit_00058_mRNA_34.1        |                                 |
| GF0034368 | 0                           | 1                            | 1                            | 0 Hypothetical protein (1)                                             |                                                                                                                                                                                                                                                                                                                                                        |                                                                                                                                                                                                                                                                                                                             |                                | C_unihit_00058_mRNA_33.1        |                                 |
| GF0034367 | 0                           | 1                            | 1                            | 0 Hypothetical protein (1)                                             | ismatch repair complex [GO:0032300 cellular_component] (1); DNA binding [GO:0003677 molecular_function] (1); ATP binding [GO:0005524 molecular_function] (1); mismatch repair [GO:0000298 biological_process] (1); mismatched DNA binding [GO:0030983 molecular_function] (1)                                                                          | P-loop containing nucleoside triphosphate hydrolase [IPR027417] (1); DNA mismatch repair protein Mci2 [IPR012642] (1); DNA mismatch repair protein Mms1, C-terminal [IPR000432] (1)                                                                                                                                         |                                | C_unihit_00058_mRNA_30.1        |                                 |
| GF0034366 | 0                           | 1                            | 1                            | 0 Hypothetical protein (1)                                             |                                                                                                                                                                                                                                                                                                                                                        |                                                                                                                                                                                                                                                                                                                             |                                | C_unihit_00058_mRNA_16.1        |                                 |
| GF0034365 | 0                           | 1                            | 1                            | 0 Hypothetical protein (1)                                             |                                                                                                                                                                                                                                                                                                                                                        |                                                                                                                                                                                                                                                                                                                             |                                | C_unihit_00058_mRNA_13.1        |                                 |
| GF0034364 | 0                           | 1                            | 1                            | 0 Hypothetical protein (1)                                             |                                                                                                                                                                                                                                                                                                                                                        |                                                                                                                                                                                                                                                                                                                             |                                | C_unihit_00058_mRNA_12.1        |                                 |
| GF0034363 | 0                           | 1                            | 1                            | 0 Hypothetical protein (1)                                             |                                                                                                                                                                                                                                                                                                                                                        |                                                                                                                                                                                                                                                                                                                             |                                | C_unihit_00058_mRNA_1.1         |                                 |
| GF0034362 | 0                           | 1                            | 1                            | 0 Hypothetical protein (1)                                             |                                                                                                                                                                                                                                                                                                                                                        | Endonuclease/exonuclease/phosphatase [IPR005133] (1); Reverse transcriptase domain [IPR000477] (1)                                                                                                                                                                                                                          |                                | C_unihit_00057_mRNA_62.1        |                                 |
| GF0034361 | 0                           | 1                            | 1                            | 0 Hypothetical protein (1)                                             |                                                                                                                                                                                                                                                                                                                                                        |                                                                                                                                                                                                                                                                                                                             |                                | C_unihit_00057_mRNA_61.1        |                                 |
| GF0034360 | 0                           | 1                            | 1                            | 0 Hypothetical protein (1)                                             |                                                                                                                                                                                                                                                                                                                                                        |                                                                                                                                                                                                                                                                                                                             |                                | C_unihit_00057_mRNA_59.1        |                                 |
| GF0034359 | 0                           | 1                            | 1                            | 0 Hypothetical protein (1)                                             |                                                                                                                                                                                                                                                                                                                                                        |                                                                                                                                                                                                                                                                                                                             |                                | C_unihit_00057_mRNA_58.1        |                                 |
| GF0034358 | 0                           | 1                            | 1                            | 0 Hypothetical protein (1)                                             |                                                                                                                                                                                                                                                                                                                                                        |                                                                                                                                                                                                                                                                                                                             |                                | C_unihit_00057_mRNA_57.1        |                                 |
| GF0034357 | 0                           | 1                            | 1                            | 0 Putative methyltransferase PMT21 (1)                                 | methyltransferase activity [GO:0000168 molecular_function] (1)                                                                                                                                                                                                                                                                                         | Putative S-adenosyl-L-methionine-dependent methyltransferase [IPR004159] (1); S-adenosyl-L-methionine-dependent methyltransferase [IPR029603] (1)                                                                                                                                                                           |                                | C_unihit_00057_mRNA_54.1        |                                 |
| GF0034356 | 0                           | 1                            | 1                            | 0 Hypothetical protein (1)                                             |                                                                                                                                                                                                                                                                                                                                                        | Glutathione S-transferase, C-terminal [IPR004046] (1); Glutathione S-transferase, C-terminal-like [IPR010987] (1)                                                                                                                                                                                                           |                                | C_unihit_00057_mRNA_45.1        |                                 |
| GF0034355 | 0                           | 1                            | 1                            | 0 Hypothetical protein (1)                                             |                                                                                                                                                                                                                                                                                                                                                        |                                                                                                                                                                                                                                                                                                                             |                                | C_unihit_00057_mRNA_44.1        |                                 |
| GF0034354 | 0                           | 1                            | 1                            | 0 Hypothetical protein (1)                                             |                                                                                                                                                                                                                                                                                                                                                        |                                                                                                                                                                                                                                                                                                                             |                                | C_unihit_00057_mRNA_43.1        |                                 |
| GF0034353 | 0                           | 1                            | 1                            | 0 Hypothetical protein (1)                                             |                                                                                                                                                                                                                                                                                                                                                        | Endonuclease/exonuclease/phosphatase [IPR005133] (1)                                                                                                                                                                                                                                                                        |                                | C_unihit_00057_mRNA_42.1        |                                 |
| GF0034352 | 0                           | 1                            | 1                            | 0 Hypothetical protein (1)                                             |                                                                                                                                                                                                                                                                                                                                                        |                                                                                                                                                                                                                                                                                                                             |                                | C_unihit_00057_mRNA_41.1        |                                 |
| GF0034351 | 0                           | 1                            | 1                            | 0 Hypothetical protein (1)                                             |                                                                                                                                                                                                                                                                                                                                                        | Domain of unknown function DU4219 [IPR023141] (1)                                                                                                                                                                                                                                                                           |                                | C_unihit_00057_mRNA_40.1        |                                 |
| GF0034350 | 0                           | 1                            | 1                            | 0 Hypothetical protein (1)                                             | nucleic acid binding [GO:0003676 molecular_function] (1); zinc ion binding [GO:0000270 molecular_function] (1)                                                                                                                                                                                                                                         | Zinc finger, CCHC-type [IPR001878] (1)                                                                                                                                                                                                                                                                                      |                                | C_unihit_00057_mRNA_39.1        |                                 |
| GF0034349 | 0                           | 1                            | 1                            | 0 Voltage-gated potassium channel subunit beta (1)                     |                                                                                                                                                                                                                                                                                                                                                        | Allosteric regulator/potassium channel subunit beta [IPR001395] (1); Potassium channel, voltage-dependent, beta subunit, KCNB-related [IPR005399] (1); NADPH-dependent oxidoreductase domain [IPR023101] (1)                                                                                                                |                                | C_unihit_00057_mRNA_29.1        |                                 |
| GF0034348 | 0                           | 1                            | 1                            | 0 Hypothetical protein (1)                                             |                                                                                                                                                                                                                                                                                                                                                        |                                                                                                                                                                                                                                                                                                                             |                                | C_unihit_00057_mRNA_25.1        |                                 |
| GF0034347 | 0                           | 1                            | 1                            | 0 Hypothetical protein (1)                                             |                                                                                                                                                                                                                                                                                                                                                        |                                                                                                                                                                                                                                                                                                                             |                                | C_unihit_00057_mRNA_24.1        |                                 |
| GF0034346 | 0                           | 1                            | 1                            | 0 Hypothetical protein (1)                                             |                                                                                                                                                                                                                                                                                                                                                        |                                                                                                                                                                                                                                                                                                                             |                                | C_unihit_00057_mRNA_21.1        |                                 |
| GF0034345 | 0                           | 1                            | 1                            | 0 Hypothetical protein (1)                                             |                                                                                                                                                                                                                                                                                                                                                        |                                                                                                                                                                                                                                                                                                                             |                                | C_unihit_00057_mRNA_2.1         |                                 |
| GF0034344 | 0                           | 1                            | 1                            | 0 UPIF481 protein (1)                                                  | zinc ion binding [GO:0000270 molecular_function] (1)                                                                                                                                                                                                                                                                                                   | Zinc finger, PAM2-type [IPR000664] (1)                                                                                                                                                                                                                                                                                      |                                | C_unihit_00057_mRNA_17.1        |                                 |
| GF0034343 | 0                           | 1                            | 1                            | 0 Hypothetical protein (1)                                             |                                                                                                                                                                                                                                                                                                                                                        | Protein of unknown function DUF247, plant [IPR004158] (1)                                                                                                                                                                                                                                                                   |                                | C_unihit_00057_mRNA_15.1        |                                 |
| GF0034342 | 0                           | 1                            | 1                            | 0 Hypothetical protein (1)                                             | regulation of transcription, DNA-templated [GO:0006355 biological_process] (1)                                                                                                                                                                                                                                                                         | FHY3FARI family [IPR011052] (1); FARI DNA binding domain [IPR004330] (1)                                                                                                                                                                                                                                                    |                                | C_unihit_00057_mRNA_10.1        |                                 |
| GF0034341 | 0                           | 1                            | 1                            | 0 Hypothetical protein (1)                                             |                                                                                                                                                                                                                                                                                                                                                        | Transposon, Ent-Spm-like [IPR004242] (1)                                                                                                                                                                                                                                                                                    |                                | C_unihit_00056_mRNA_79.1        |                                 |
| GF0034340 | 0                           | 1                            | 1                            | 0 Hypothetical protein (1)                                             |                                                                                                                                                                                                                                                                                                                                                        |                                                                                                                                                                                                                                                                                                                             |                                | C_unihit_00056_mRNA_76.1        |                                 |
| GF0034339 | 0                           | 1                            | 1                            | 0 Hypothetical protein (1)                                             |                                                                                                                                                                                                                                                                                                                                                        |                                                                                                                                                                                                                                                                                                                             |                                | C_unihit_00056_mRNA_70.1        |                                 |
| GF0034338 | 0                           | 1                            | 1                            | 0 Hypothetical protein (1)                                             |                                                                                                                                                                                                                                                                                                                                                        |                                                                                                                                                                                                                                                                                                                             |                                | C_unihit_00056_mRNA_67.1        |                                 |
| GF0034337 | 0                           | 1                            | 1                            | 0 Hypothetical protein (1)                                             |                                                                                                                                                                                                                                                                                                                                                        | Chromatin shroud domain [IPR000953] (1); Chromo domain-like [IPR016197] (1); Chromo domain [IPR023780] (1)                                                                                                                                                                                                                  |                                | C_unihit_00056_mRNA_66.1        |                                 |
| GF0034336 | 0                           | 1                            | 1                            | 0 Hypothetical protein (1)                                             |                                                                                                                                                                                                                                                                                                                                                        |                                                                                                                                                                                                                                                                                                                             |                                | C_unihit_00056_mRNA_64.1        |                                 |
| GF0034335 | 0                           | 1                            | 1                            | 0 FAD-binding Berberine family protein (1)                             | flavin adenine dinucleotide binding [GO:0050660 molecular_function] (1); oxidoreduction process [GO:0005114 biological_process] (1); oxidoreductase activity [GO:0016491 molecular_function] (1); oxidoreductase activity, acting on CH-OH group of donors [GO:0016014 molecular_function] (1); catalytic activity [GO:0003824 molecular_function] (1) | Berberine/berberine-like [IPR012951] (1); FAD-binding, type 2, subdomain 1 [IPR016167] (1); CO dehydrogenase flavoprotein-like, FAD-binding, subdomain 2 [IPR016169] (1); FAD linked oxidase, N-terminal [IPR006094] (1); FAD-binding, type 2 [IPR016166] (1)                                                               |                                | C_unihit_00056_mRNA_44.1        |                                 |
| GF0034334 | 0                           | 1                            | 1                            | 0 Hypothetical protein (1)                                             |                                                                                                                                                                                                                                                                                                                                                        | F-box domain [IPR001810] (1)                                                                                                                                                                                                                                                                                                |                                | C_unihit_00056_mRNA_38.1        |                                 |
| GF0034333 | 0                           | 1                            | 1                            | 0 Hypothetical protein (1)                                             |                                                                                                                                                                                                                                                                                                                                                        | F-box associated domain, type 3 [IPR013187] (1)                                                                                                                                                                                                                                                                             |                                | C_unihit_00056_mRNA_37.1        |                                 |
| GF0034332 | 0                           | 1                            | 1                            | 0 Ferric reduction oxidase 2 (1)                                       | oxidation-reduction process [GO:0005114 biological_process] (1); oxidoreductase activity [GO:0016491 molecular_function] (1)                                                                                                                                                                                                                           | FAD-binding 8 [IPR013112] (1); Ferric reductase, NAD binding domain [IPR013121] (1); Ferredoxin reductase-type FAD-binding domain [IPR017927] (1); Ferric reductase transmembrane component-like domain [IPR013130] (1)                                                                                                     |                                | C_unihit_00056_mRNA_11.1        |                                 |
| GF0034331 | 0                           | 1                            | 1                            | 0 Hypothetical protein (1)                                             |                                                                                                                                                                                                                                                                                                                                                        |                                                                                                                                                                                                                                                                                                                             |                                | C_unihit_00055_mRNA_7.1         |                                 |
| GF0034330 | 0                           | 1                            | 1                            | 0 Hypothetical protein (1)                                             |                                                                                                                                                                                                                                                                                                                                                        |                                                                                                                                                                                                                                                                                                                             |                                | C_unihit_00055_mRNA_59.1        |                                 |
| GF0034329 | 0                           | 1                            | 1                            | 0 Hypothetical protein (1)                                             |                                                                                                                                                                                                                                                                                                                                                        | Transposase, MuDR, plant [IPR004332] (1)                                                                                                                                                                                                                                                                                    |                                | C_unihit_00055_mRNA_39.1        |                                 |

| ID        | Num. in <i>C. crottenstei</i> | Num. in <i>C. auris</i> | Num. in <i>P. putida</i> | Note                                            | GO                                                                                                                                                                                                                                                                                                                                                                                                                       | InterPro                                                                                                                                                                                                                                                                                                                                                                                                                                                                                                                                                                                                                   | Members in <i>C. crottenstei</i> | Members in <i>C. auris</i> | Members in <i>P. putida</i> |
|-----------|-------------------------------|-------------------------|--------------------------|-------------------------------------------------|--------------------------------------------------------------------------------------------------------------------------------------------------------------------------------------------------------------------------------------------------------------------------------------------------------------------------------------------------------------------------------------------------------------------------|----------------------------------------------------------------------------------------------------------------------------------------------------------------------------------------------------------------------------------------------------------------------------------------------------------------------------------------------------------------------------------------------------------------------------------------------------------------------------------------------------------------------------------------------------------------------------------------------------------------------------|----------------------------------|----------------------------|-----------------------------|
| GF0034328 | 0                             | 1                       | 0                        | Hypothetical protein (1)                        |                                                                                                                                                                                                                                                                                                                                                                                                                          |                                                                                                                                                                                                                                                                                                                                                                                                                                                                                                                                                                                                                            |                                  | C_unih0_00055_mRNA_26.1    |                             |
| GF0034327 | 0                             | 1                       | 0                        | Hypothetical protein (1)                        |                                                                                                                                                                                                                                                                                                                                                                                                                          |                                                                                                                                                                                                                                                                                                                                                                                                                                                                                                                                                                                                                            |                                  | C_unih0_00055_mRNA_25.1    |                             |
| GF0034326 | 0                             | 1                       | 0                        | Hypothetical protein (1)                        | glycine dehydrogenase (decarboxylating) activity [GO:000475 molecular_function] (1); glycine catabolic process [GO:0006056 biological_process] (1); oxidative-reduction process [GO:005114 biological_process] (1)                                                                                                                                                                                                       | Glycine cleavage system P protein [IPR020581] (1); Glycine cleavage system P protein, N-terminal [IPR020580] (1); Pyridoxal phosphate-dependent transferase [IPR015424] (1)                                                                                                                                                                                                                                                                                                                                                                                                                                                |                                  | C_unih0_00055_mRNA_2.1     |                             |
| GF0034325 | 0                             | 1                       | 0                        | K(+)-efflux antiporter 4 (1)                    | cation transport [GO:006812 biological_process] (1); integral component of membrane [GO:0016021 cellular_component] (1); transmembrane transport [GO:0055085 biological_process] (1); solute:proton antiporter activity [GO:0015299 molecular_function] (1)                                                                                                                                                              | Histone deacetylase domain [IPR023801] (1); Histone deacetylase superfamily [IPR006286] (1); Cation/H <sup>+</sup> -exchanger [IPR006153] (1)                                                                                                                                                                                                                                                                                                                                                                                                                                                                              |                                  | C_unih0_00055_mRNA_11.1    |                             |
| GF0034324 | 0                             | 1                       | 0                        | Hypothetical protein (1)                        |                                                                                                                                                                                                                                                                                                                                                                                                                          |                                                                                                                                                                                                                                                                                                                                                                                                                                                                                                                                                                                                                            |                                  | C_unih0_00054_mRNA_8.1     |                             |
| GF0034323 | 0                             | 1                       | 0                        | Hypothetical protein (1)                        |                                                                                                                                                                                                                                                                                                                                                                                                                          |                                                                                                                                                                                                                                                                                                                                                                                                                                                                                                                                                                                                                            |                                  | C_unih0_00054_mRNA_70.1    |                             |
| GF0034322 | 0                             | 1                       | 0                        | Hypothetical protein (1)                        |                                                                                                                                                                                                                                                                                                                                                                                                                          |                                                                                                                                                                                                                                                                                                                                                                                                                                                                                                                                                                                                                            |                                  | C_unih0_00054_mRNA_66.1    |                             |
| GF0034321 | 0                             | 1                       | 0                        | Mutator-like transposase (1)                    | nucleic acid binding [GO:0003676 molecular_function] (1); zinc ion binding [GO:0008070 molecular_function] (1)                                                                                                                                                                                                                                                                                                           | Domain of unknown function DUF1985 [IPR015410] (1); Argos domain, plant type [IPR014002] (1); EMSY N-terminal [IPR005491] (1); Zinc finger, CCHC-type [IPR001878] (1); Zinc finger, PAM-type [IPR006564] (1); Transposase, MuIR, plant [IPR004321] (1); Zinc finger, SWIM-type [IPR007527] (1)                                                                                                                                                                                                                                                                                                                             |                                  | C_unih0_00054_mRNA_65.1    |                             |
| GF0034320 | 0                             | 1                       | 0                        | Disease resistance protein family, putative (1) |                                                                                                                                                                                                                                                                                                                                                                                                                          | Leucine-rich repeat domain, L domain-like [IPR026751] (1)                                                                                                                                                                                                                                                                                                                                                                                                                                                                                                                                                                  |                                  | C_unih0_00054_mRNA_63.1    |                             |
| GF0034319 | 0                             | 1                       | 0                        | Disease resistance RPS5-like protein (1)        | protein binding [GO:0005515 molecular_function] (1)                                                                                                                                                                                                                                                                                                                                                                      | Leucine-rich repeat, typical subtype [IPR003911] (1); Leucine-rich repeat domain, L domain-like [IPR026751] (1); Leucine-rich repeat [IPR001611] (1)                                                                                                                                                                                                                                                                                                                                                                                                                                                                       |                                  | C_unih0_00054_mRNA_62.1    |                             |
| GF0034318 | 0                             | 1                       | 0                        | Disease resistance protein family, putative (1) |                                                                                                                                                                                                                                                                                                                                                                                                                          | Leucine-rich repeat, typical subtype [IPR003911] (1); Leucine-rich repeat domain, L domain-like [IPR026751] (1)                                                                                                                                                                                                                                                                                                                                                                                                                                                                                                            |                                  | C_unih0_00054_mRNA_60.1    |                             |
| GF0034317 | 0                             | 1                       | 0                        | Disease resistance RPS5-like protein (1)        |                                                                                                                                                                                                                                                                                                                                                                                                                          | Leucine-rich repeat domain, L domain-like [IPR026751] (1)                                                                                                                                                                                                                                                                                                                                                                                                                                                                                                                                                                  |                                  | C_unih0_00054_mRNA_57.1    |                             |
| GF0034316 | 0                             | 1                       | 0                        | Hypothetical protein (1)                        |                                                                                                                                                                                                                                                                                                                                                                                                                          |                                                                                                                                                                                                                                                                                                                                                                                                                                                                                                                                                                                                                            |                                  | C_unih0_00054_mRNA_55.1    |                             |
| GF0034315 | 0                             | 1                       | 0                        | Hypothetical protein (1)                        |                                                                                                                                                                                                                                                                                                                                                                                                                          |                                                                                                                                                                                                                                                                                                                                                                                                                                                                                                                                                                                                                            |                                  | C_unih0_00054_mRNA_49.1    |                             |
| GF0034314 | 0                             | 1                       | 0                        | Hypothetical protein (1)                        | protein kinase activity [GO:0004672 molecular_function] (1); protein phosphorylation [GO:0006468 biological_process] (1); ATP binding [GO:0005224 molecular_function] (1)                                                                                                                                                                                                                                                | Serine-threonine/tyrosine-protein kinase catalytic domain [IPR001245] (1); Serine-threonine-protein kinase, active site [IPR008271] (1); Serine/threonine/dual specificity protein kinase, catalytic domain [IPR002290] (1); Protein kinase-like domain [IPR011009] (1); Protein kinase domain [IPR007079] (1)                                                                                                                                                                                                                                                                                                             |                                  | C_unih0_00054_mRNA_48.1    |                             |
| GF0034313 | 0                             | 1                       | 0                        | Hypothetical protein (1)                        |                                                                                                                                                                                                                                                                                                                                                                                                                          | Protein kinase-like domain [IPR011009] (1)                                                                                                                                                                                                                                                                                                                                                                                                                                                                                                                                                                                 |                                  | C_unih0_00054_mRNA_45.1    |                             |
| GF0034312 | 0                             | 1                       | 0                        | Receptor protein kinase (1)                     | ATP binding [GO:0005224 molecular_function] (1); protein phosphorylation [GO:0006468 biological_process] (1); protein kinase activity [GO:0004672 molecular_function] (1)                                                                                                                                                                                                                                                | Protein kinase domain [IPR007191] (1); Protein kinase-like domain [IPR011009] (1); Serine/threonine/dual specificity protein kinase, catalytic domain [IPR002290] (1)                                                                                                                                                                                                                                                                                                                                                                                                                                                      |                                  | C_unih0_00054_mRNA_44.1    |                             |
| GF0034311 | 0                             | 1                       | 0                        | Hypothetical protein (1)                        |                                                                                                                                                                                                                                                                                                                                                                                                                          |                                                                                                                                                                                                                                                                                                                                                                                                                                                                                                                                                                                                                            |                                  | C_unih0_00054_mRNA_42.1    |                             |
| GF0034310 | 0                             | 1                       | 0                        | 60S ribosomal protein L51, mitochondrial (1)    |                                                                                                                                                                                                                                                                                                                                                                                                                          | Ribosomal protein/LA181 dehydrogenase domain [IPR007741] (1); Thioesterin-like fold [IPR012336] (1)                                                                                                                                                                                                                                                                                                                                                                                                                                                                                                                        |                                  | C_unih0_00054_mRNA_34.1    |                             |
| GF0034309 | 0                             | 1                       | 0                        | Hypothetical protein (1)                        | zinc ion binding [GO:0008270 molecular_function] (1); nucleic acid binding [GO:0003676 molecular_function] (1)                                                                                                                                                                                                                                                                                                           | Domain of unknown function DUF4283 [IPR025558] (1); Zinc finger, CCHC-type [IPR001878] (1); Zinc knuckle C2C2/4/4/4C [IPR025560] (1)                                                                                                                                                                                                                                                                                                                                                                                                                                                                                       |                                  | C_unih0_00054_mRNA_3.1     |                             |
| GF0034308 | 0                             | 1                       | 0                        | Hypothetical protein (1)                        |                                                                                                                                                                                                                                                                                                                                                                                                                          | Leucine-rich repeat domain, L domain-like [IPR026751] (1)                                                                                                                                                                                                                                                                                                                                                                                                                                                                                                                                                                  |                                  | C_unih0_00054_mRNA_24.1    |                             |
| GF0034307 | 0                             | 1                       | 0                        | Hypothetical protein (1)                        |                                                                                                                                                                                                                                                                                                                                                                                                                          | Leucine-rich repeat domain, L domain-like [IPR026751] (1)                                                                                                                                                                                                                                                                                                                                                                                                                                                                                                                                                                  |                                  | C_unih0_00054_mRNA_21.1    |                             |
| GF0034306 | 0                             | 1                       | 0                        | Hypothetical protein (1)                        |                                                                                                                                                                                                                                                                                                                                                                                                                          |                                                                                                                                                                                                                                                                                                                                                                                                                                                                                                                                                                                                                            |                                  | C_unih0_00053_mRNA_8.1     |                             |
| GF0034305 | 0                             | 1                       | 0                        | Hypothetical protein (1)                        |                                                                                                                                                                                                                                                                                                                                                                                                                          |                                                                                                                                                                                                                                                                                                                                                                                                                                                                                                                                                                                                                            |                                  | C_unih0_00053_mRNA_72.1    |                             |
| GF0034304 | 0                             | 1                       | 0                        | Hypothetical protein (1)                        |                                                                                                                                                                                                                                                                                                                                                                                                                          |                                                                                                                                                                                                                                                                                                                                                                                                                                                                                                                                                                                                                            |                                  | C_unih0_00053_mRNA_68.1    |                             |
| GF0034303 | 0                             | 1                       | 0                        | Hypothetical protein (1)                        | cysteine-type peptidase activity [GO:0008234 molecular_function] (1); proteolysis [GO:0006508 biological_process] (1)                                                                                                                                                                                                                                                                                                    | Ulp1 protease family, C-terminal catalytic domain [IPR003453] (1)                                                                                                                                                                                                                                                                                                                                                                                                                                                                                                                                                          |                                  | C_unih0_00053_mRNA_65.1    |                             |
| GF0034302 | 0                             | 1                       | 0                        | Hypothetical protein (1)                        |                                                                                                                                                                                                                                                                                                                                                                                                                          |                                                                                                                                                                                                                                                                                                                                                                                                                                                                                                                                                                                                                            |                                  | C_unih0_00053_mRNA_6.1     |                             |
| GF0034301 | 0                             | 1                       | 0                        | Hypothetical protein (1)                        |                                                                                                                                                                                                                                                                                                                                                                                                                          |                                                                                                                                                                                                                                                                                                                                                                                                                                                                                                                                                                                                                            |                                  | C_unih0_00053_mRNA_5.1     |                             |
| GF0034300 | 0                             | 1                       | 0                        | Hypothetical protein (1)                        | nucleic acid binding [GO:0003676 molecular_function] (1)                                                                                                                                                                                                                                                                                                                                                                 | Ribonuclease H-like domain [IPR012337] (1)                                                                                                                                                                                                                                                                                                                                                                                                                                                                                                                                                                                 |                                  | C_unih0_00053_mRNA_4.1     |                             |
| GF0034299 | 0                             | 1                       | 0                        | Hypothetical protein (1)                        | RNA-DNA hybrid ribonuclease activity [GO:0004523 molecular_function] (1); nucleic acid binding [GO:0003676 molecular_function] (1)                                                                                                                                                                                                                                                                                       | Ribonuclease H domain [IPR002156] (1); Ribonuclease H-like domain [IPR012337] (1)                                                                                                                                                                                                                                                                                                                                                                                                                                                                                                                                          |                                  | C_unih0_00053_mRNA_37.1    |                             |
| GF0034298 | 0                             | 1                       | 0                        | Hypothetical protein (1)                        | photosynthesis, light reaction [GO:0019884 biological_process] (1); photosynthetic electron transport in photosystem II [GO:0009772 biological_process] (1); electron transport, transferring electrons within the cyclic electron transport pathway of photosynthesis activity [GO:0045156 molecular_function] (1)                                                                                                      | Photosynthetic reaction centre, LAM [IPR004844] (1)                                                                                                                                                                                                                                                                                                                                                                                                                                                                                                                                                                        |                                  | C_unih0_00053_mRNA_2.1     |                             |
| GF0034297 | 0                             | 1                       | 0                        | Hypothetical protein (1)                        |                                                                                                                                                                                                                                                                                                                                                                                                                          |                                                                                                                                                                                                                                                                                                                                                                                                                                                                                                                                                                                                                            |                                  | C_unih0_00053_mRNA_10.1    |                             |
| GF0034296 | 0                             | 1                       | 0                        | Hypothetical protein (1)                        | DNA-directed RNA polymerase activity [GO:0003899 molecular_function] (1); ribonucleoside binding [GO:0032849 molecular_function] (1); DNA binding [GO:0000077 molecular_function] (1); hydrogen ion transmembrane transporter activity [GO:0015078 molecular_function] (1); ATP synthesis coupled proton transport [GO:0015986 biological_process] (1); transmembrane, DNA-templated [GO:0006351 biological_process] (1) | RNA polymerase, beta subunit, conserved site [IPR007121] (1); DNA-directed RNA polymerase, subunit 2 [IPR015712] (1); ATPase, F0 complex, subunit A [IPR000568] (1); ABC 2-type transporter [IPR015225] (1); G10 protein [IPR007748] (1); P-loop containing nucleoside triphosphate hydrolase [IPR023471] (1); RNA polymerase, alpha subunit [IPR007022] (1); RNA polymerase Rpb2, domain 7 [IPR007641] (1); RNA polymerase Rpb2, Ose-fold [IPR014724] (1); DNA-directed RNA polymerase, subunit 2, domain 6 [IPR001201] (1); RNA polymerase Rpb1, domain 1 [IPR007080] (1); RNA polymerase Rpb1, domain 4 [IPR007066] (1) |                                  | C_unih0_00051_mRNA_1.1     |                             |
| GF0034295 | 0                             | 1                       | 0                        | Hypothetical protein (1)                        |                                                                                                                                                                                                                                                                                                                                                                                                                          |                                                                                                                                                                                                                                                                                                                                                                                                                                                                                                                                                                                                                            |                                  | C_unih0_00052_mRNA_72.1    |                             |
| GF0034294 | 0                             | 1                       | 0                        | Hypothetical protein (1)                        |                                                                                                                                                                                                                                                                                                                                                                                                                          |                                                                                                                                                                                                                                                                                                                                                                                                                                                                                                                                                                                                                            |                                  | C_unih0_00052_mRNA_71.1    |                             |
| GF0034293 | 0                             | 1                       | 0                        | Hypothetical protein (1)                        |                                                                                                                                                                                                                                                                                                                                                                                                                          |                                                                                                                                                                                                                                                                                                                                                                                                                                                                                                                                                                                                                            |                                  | C_unih0_00052_mRNA_70.1    |                             |
| GF0034292 | 0                             | 1                       | 0                        | Hypothetical protein (1)                        |                                                                                                                                                                                                                                                                                                                                                                                                                          |                                                                                                                                                                                                                                                                                                                                                                                                                                                                                                                                                                                                                            |                                  | C_unih0_00052_mRNA_69.1    |                             |
| GF0034291 | 0                             | 1                       | 0                        | Hypothetical protein (1)                        |                                                                                                                                                                                                                                                                                                                                                                                                                          |                                                                                                                                                                                                                                                                                                                                                                                                                                                                                                                                                                                                                            |                                  | C_unih0_00052_mRNA_59.1    |                             |
| GF0034290 | 0                             | 1                       | 0                        | ABC transporter G family member 41 (1)          | membrane [GO:0016020 cellular_component] (1); ATPase activity [GO:0016087 molecular_function] (1); ATP binding [GO:0005224 molecular_function] (1); nucleus [GO:0005634 cellular_component] (1); nucleic acid binding [GO:0003676 molecular_function] (1); nucleus [GO:0005634 cellular_component] (1); hydrolase activity, acting on ester bonds [GO:0016788 molecular_function] (1)                                    | AAA+ ATPase domain [IPR003593] (1); ABC transporter-like [IPR004399] (1); ABC 2-type transporter [IPR015225] (1); G10 protein [IPR007748] (1); P-loop containing nucleoside triphosphate hydrolase [IPR023471] (1); Cleavage/polyadenylation specificity factor, A subunit, C-terminal [IPR004871] (1); SCN5A hydrolase-type esterase domain [IPR013830] (1); GDSL lipase-esterase [IPR001087] (1)                                                                                                                                                                                                                         |                                  | C_unih0_00052_mRNA_53.1    |                             |
| GF0034289 | 0                             | 1                       | 0                        | Acetylcholinesterase (1)                        |                                                                                                                                                                                                                                                                                                                                                                                                                          |                                                                                                                                                                                                                                                                                                                                                                                                                                                                                                                                                                                                                            |                                  | C_unih0_00052_mRNA_5.1     |                             |
| GF0034288 | 0                             | 1                       | 0                        | Hypothetical protein (1)                        |                                                                                                                                                                                                                                                                                                                                                                                                                          |                                                                                                                                                                                                                                                                                                                                                                                                                                                                                                                                                                                                                            |                                  | C_unih0_00052_mRNA_4.1     |                             |
| GF0034287 | 0                             | 1                       | 0                        | Hypothetical protein (1)                        |                                                                                                                                                                                                                                                                                                                                                                                                                          |                                                                                                                                                                                                                                                                                                                                                                                                                                                                                                                                                                                                                            |                                  | C_unih0_00052_mRNA_3.1     |                             |
| GF0034286 | 0                             | 1                       | 0                        | Gemini 10-hydroxylase-like protein (1)          | oxidoreductase activity, acting on paired donors, with incorporation or reduction of molecular oxygen [GO:0016785 molecular_function] (1); oxidation-reduction process [GO:0055114 biological_process] (1); heme binding [GO:0020037 molecular_function] (1); zinc ion binding [GO:0005506 molecular_function] (1)                                                                                                       | Cytochrome P450 [IPR001120] (1); Cytochrome P450, conserved site [IPR017922] (1); Cytochrome P450, E-class, group I [IPR002401] (1)                                                                                                                                                                                                                                                                                                                                                                                                                                                                                        |                                  | C_unih0_00052_mRNA_19.1    |                             |
| GF0034285 | 0                             | 1                       | 0                        | Hypothetical protein (1)                        |                                                                                                                                                                                                                                                                                                                                                                                                                          |                                                                                                                                                                                                                                                                                                                                                                                                                                                                                                                                                                                                                            |                                  | C_unih0_00052_mRNA_15.1    |                             |
| GF0034284 | 0                             | 1                       | 0                        | Hypothetical protein (1)                        |                                                                                                                                                                                                                                                                                                                                                                                                                          |                                                                                                                                                                                                                                                                                                                                                                                                                                                                                                                                                                                                                            |                                  | C_unih0_00052_mRNA_12.1    |                             |
| GF0034283 | 0                             | 1                       | 0                        | Amine oxidase (flavin-containing) (1)           | quinone binding [GO:0048038 molecular_function] (1); copper ion binding [GO:0005507 molecular_function] (1); oxidation-reduction process [GO:0055114 biological_process] (1); amine metabolic process [GO:0009308 biological_process] (1); primary amine oxidase activity [GO:0008131 molecular_function] (1)                                                                                                            | Copper amine oxidase [IPR000209] (1); Copper amine oxidase, C-terminal [IPR015798] (1)                                                                                                                                                                                                                                                                                                                                                                                                                                                                                                                                     |                                  | C_unih0_00051_mRNA_71.1    |                             |
| GF0034282 | 0                             | 1                       | 0                        | Hypothetical protein (1)                        | quinone binding [GO:0048038 molecular_function] (1); copper ion binding [GO:0005507 molecular_function] (1); oxidation-reduction process [GO:0055114 biological_process] (1); amine metabolic process [GO:0009308 biological_process] (1); primary amine oxidase activity [GO:0008131 molecular_function] (1)                                                                                                            | Copper amine oxidase, C-terminal [IPR015798] (1); Copper amine oxidase [IPR000209] (1)                                                                                                                                                                                                                                                                                                                                                                                                                                                                                                                                     |                                  | C_unih0_00051_mRNA_70.1    |                             |
| GF0034281 | 0                             | 1                       | 0                        | Hypothetical protein (1)                        |                                                                                                                                                                                                                                                                                                                                                                                                                          |                                                                                                                                                                                                                                                                                                                                                                                                                                                                                                                                                                                                                            |                                  | C_unih0_00051_mRNA_7.1     |                             |

| ID        | Num. in <i>C. crottensteini</i> | Num. in <i>C. auris</i> | Num. in <i>P. putida</i> | Note                                                                             | GO                                                                                                                                                                                                                                                                                                                                                                                                                                                                     | InterPro                                                                                                                                                                                                                                                                                                            | Members in <i>C. crottensteini</i> | Members in <i>C. auris</i> | Members in <i>P. putida</i> |
|-----------|---------------------------------|-------------------------|--------------------------|----------------------------------------------------------------------------------|------------------------------------------------------------------------------------------------------------------------------------------------------------------------------------------------------------------------------------------------------------------------------------------------------------------------------------------------------------------------------------------------------------------------------------------------------------------------|---------------------------------------------------------------------------------------------------------------------------------------------------------------------------------------------------------------------------------------------------------------------------------------------------------------------|------------------------------------|----------------------------|-----------------------------|
|           |                                 |                         |                          |                                                                                  | membrane (GO:0016020 cellular_component) (1); transmembrane transporter activity (GO:0022857 molecular_function) (1); integral component of membrane (GO:0016021 cellular_component) (1); substrate-specific transmembrane transporter activity (GO:0022891 molecular_function) (1); transmembrane transport (GO:0050985 biological_process) (1); transporter activity (GO:0005215 molecular_function) (1)                                                             | Sugar transporter, conserved site (IPR005829) (1); Major facilitator superfamily domain (IPR020846) (1); Major facilitator, sugar transporter-like (IPR005829) (1); Sugar/iron/iodine transporter (IPR003663) (1)                                                                                                   |                                    | C_unihii_00051_mRNA_63.1   | -                           |
| GF0034279 | 0                               | 1                       | 0                        | Hypothetical protein (1)                                                         | protein binding (GO:0005515 molecular_function) (1)                                                                                                                                                                                                                                                                                                                                                                                                                    | Leucine-rich repeat, typical subtype (IPR003991) (1); Leucine-rich repeat domain, I. domain-like (IPR002675) (1); Leucine-rich repeat (IPR001611) (1); Leucine-rich repeat domain, I. domain-like (IPR023675) (1)                                                                                                   |                                    | C_unihii_00051_mRNA_20.1   | -                           |
| GF0034278 | 0                               | 1                       | 0                        | Hypothetical protein (1)                                                         | protein binding (GO:0005515 molecular_function) (1)                                                                                                                                                                                                                                                                                                                                                                                                                    |                                                                                                                                                                                                                                                                                                                     |                                    | C_unihii_00051_mRNA_19.1   | -                           |
| GF0034277 | 0                               | 1                       | 0                        | Hypothetical protein (1)                                                         |                                                                                                                                                                                                                                                                                                                                                                                                                                                                        |                                                                                                                                                                                                                                                                                                                     |                                    | C_unihii_00051_mRNA_18.1   | -                           |
| GF0034276 | 0                               | 1                       | 0                        | Hypothetical protein (1)                                                         |                                                                                                                                                                                                                                                                                                                                                                                                                                                                        |                                                                                                                                                                                                                                                                                                                     |                                    | C_unihii_00051_mRNA_17.1   | -                           |
| GF0034275 | 0                               | 1                       | 0                        | Hypothetical protein (1)                                                         |                                                                                                                                                                                                                                                                                                                                                                                                                                                                        |                                                                                                                                                                                                                                                                                                                     |                                    | C_unihii_00051_mRNA_16.1   | -                           |
| GF0034274 | 0                               | 1                       | 0                        | Hypothetical protein (1)                                                         |                                                                                                                                                                                                                                                                                                                                                                                                                                                                        |                                                                                                                                                                                                                                                                                                                     |                                    | C_unihii_00051_mRNA_13.1   | -                           |
| GF0034273 | 0                               | 1                       | 0                        | Hypothetical protein (1)                                                         |                                                                                                                                                                                                                                                                                                                                                                                                                                                                        |                                                                                                                                                                                                                                                                                                                     |                                    | C_unihii_00051_mRNA_11.1   | -                           |
| GF0034272 | 0                               | 1                       | 0                        | Hypothetical protein (1)                                                         |                                                                                                                                                                                                                                                                                                                                                                                                                                                                        |                                                                                                                                                                                                                                                                                                                     |                                    | C_unihii_00050_mRNA_7.1    | -                           |
| GF0034271 | 0                               | 1                       | 0                        | Hypothetical protein (1)                                                         |                                                                                                                                                                                                                                                                                                                                                                                                                                                                        |                                                                                                                                                                                                                                                                                                                     |                                    | C_unihii_00050_mRNA_6.1    | -                           |
| GF0034270 | 0                               | 1                       | 0                        | Phosphopase C 3 (1)                                                              | hydrolase activity, acting on ester bonds (GO:016788 molecular_function) (1); catalytic activity (GO:0003824 molecular_function) (1); metabolic process (GO:0008152 biological_process) (1)                                                                                                                                                                                                                                                                            | Phosphotesterase (IPR007312) (1); Alkaline-phosphatase-like, core domain (IPR017850) (4)                                                                                                                                                                                                                            |                                    | C_unihii_00050_mRNA_50.1   | -                           |
| GF0034269 | 0                               | 1                       | 0                        | Hypothetical protein (1)                                                         | ADP binding (GO:0045331 molecular_function) (1)                                                                                                                                                                                                                                                                                                                                                                                                                        | NB-ARC (IPR021812) (1); P-loop containing nucleoside triphosphate hydrolase (IPR027471) (1)                                                                                                                                                                                                                         |                                    | C_unihii_00050_mRNA_5.1    | -                           |
| GF0034268 | 0                               | 1                       | 0                        | Phosphopase A22 (1)                                                              |                                                                                                                                                                                                                                                                                                                                                                                                                                                                        | Phosphopase A2 domain (IPR016090) (1)                                                                                                                                                                                                                                                                               |                                    | C_unihii_00050_mRNA_48.1   | -                           |
| GF0034267 | 0                               | 1                       | 0                        | Rho GTPase-activating 35 (1)                                                     | signal transduction (GO:0007165 biological_process) (1)                                                                                                                                                                                                                                                                                                                                                                                                                | Phactinin homology domain (IPR01849) (1); Rho GTPase activator protein (IPR008936) (1); Ternary complex factor MP1, leucine-zipper (IPR02577) (1); PH domain-like (IPR011993) (1); Rho GTPase-activating protein domain (IPR00198) (4)                                                                              |                                    | C_unihii_00050_mRNA_47.1   | -                           |
| GF0034266 | 0                               | 1                       | 0                        | Hypothetical protein (1)                                                         |                                                                                                                                                                                                                                                                                                                                                                                                                                                                        |                                                                                                                                                                                                                                                                                                                     |                                    | C_unihii_00050_mRNA_3.1    | -                           |
| GF0034265 | 0                               | 1                       | 0                        | Hypothetical protein (1)                                                         |                                                                                                                                                                                                                                                                                                                                                                                                                                                                        |                                                                                                                                                                                                                                                                                                                     |                                    | C_unihii_00050_mRNA_22.1   | -                           |
| GF0034264 | 0                               | 1                       | 0                        | Hypothetical protein (1)                                                         |                                                                                                                                                                                                                                                                                                                                                                                                                                                                        |                                                                                                                                                                                                                                                                                                                     |                                    | C_unihii_00050_mRNA_2.1    | -                           |
| GF0034263 | 0                               | 1                       | 0                        | Hypothetical protein (1)                                                         |                                                                                                                                                                                                                                                                                                                                                                                                                                                                        |                                                                                                                                                                                                                                                                                                                     |                                    | C_unihii_00050_mRNA_19.1   | -                           |
| GF0034262 | 0                               | 1                       | 0                        | Hypothetical protein (1)                                                         |                                                                                                                                                                                                                                                                                                                                                                                                                                                                        |                                                                                                                                                                                                                                                                                                                     |                                    | C_unihii_00049_mRNA_99.1   | -                           |
| GF0034261 | 0                               | 1                       | 0                        | Hypothetical protein (1)                                                         |                                                                                                                                                                                                                                                                                                                                                                                                                                                                        |                                                                                                                                                                                                                                                                                                                     |                                    | C_unihii_00049_mRNA_58.1   | -                           |
| GF0034260 | 0                               | 1                       | 0                        | Hypothetical protein (1)                                                         |                                                                                                                                                                                                                                                                                                                                                                                                                                                                        |                                                                                                                                                                                                                                                                                                                     |                                    | C_unihii_00049_mRNA_44.1   | -                           |
| GF0034259 | 0                               | 1                       | 0                        | Hypothetical protein (1)                                                         |                                                                                                                                                                                                                                                                                                                                                                                                                                                                        |                                                                                                                                                                                                                                                                                                                     |                                    | C_unihii_00049_mRNA_40.1   | -                           |
| GF0034258 | 0                               | 1                       | 0                        | F-box protein interaction domain protein (1)                                     | protein binding (GO:0005515 molecular_function) (1)                                                                                                                                                                                                                                                                                                                                                                                                                    | F-box associated domain, type 1 (IPR006271) (1); F-box domain (IPR001810) (1); F-box associated interaction domain (IPR017451) (1)                                                                                                                                                                                  |                                    | C_unihii_00049_mRNA_37.1   | -                           |
| GF0034257 | 0                               | 1                       | 0                        | Hypothetical protein (1)                                                         |                                                                                                                                                                                                                                                                                                                                                                                                                                                                        |                                                                                                                                                                                                                                                                                                                     |                                    | C_unihii_00049_mRNA_24.1   | -                           |
| GF0034256 | 0                               | 1                       | 0                        | DNA ligase (1)                                                                   | DNA repair (GO:0006281 biological_process) (1); DNA binding (GO:0003677 molecular_function) (1); ATP binding (GO:0005524 molecular_function) (1); DNA recombination (GO:0006110 biological_process) (1); DNA ligase (ATP) activity (GO:0003910 molecular_function) (1); DNA biosynthetic process (GO:0071897 biological_process) (1); DNA ligase activity (GO:0003909 molecular_function) (1); DNA ligation involved in DNA repair (GO:0051160 biological_process) (1) | DNA ligase, ATP-dependent, N-terminal (IPR012308) (1); DNA ligase, ATP-dependent, central (IPR01310) (1); DNA ligase, ATP-dependent, conserved site (IPR016099) (1); DNA ligase, ATP-dependent (IPR00077) (1)                                                                                                       |                                    | C_unihii_00049_mRNA_1.1    | -                           |
| GF0034255 | 0                               | 1                       | 0                        | Chlorophyll a/b binding protein (1)                                              | membrane (GO:0016020 cellular_component) (1); photosynthesis, light harvesting (GO:0009765 biological_process) (1)                                                                                                                                                                                                                                                                                                                                                     | Chlorophyll A-B binding protein, plant (IPR001344) (1); Chlorophyll a/b binding protein domain (IPR023325) (1)                                                                                                                                                                                                      |                                    | C_unihii_00048_mRNA_94.1   | -                           |
| GF0034254 | 0                               | 1                       | 0                        | Light-harvesting complex II chlorophyll a/b binding protein, n-terminal part (1) | membrane (GO:0016020 cellular_component) (1); photosynthesis, light harvesting (GO:0009765 biological_process) (1)                                                                                                                                                                                                                                                                                                                                                     | Chlorophyll A-B binding protein, plant (IPR001344) (1)                                                                                                                                                                                                                                                              |                                    | C_unihii_00048_mRNA_93.1   | -                           |
| GF0034253 | 0                               | 1                       | 0                        | Chlorophyll a/b binding protein, chloroplastic (1)                               | photosynthesis, light harvesting (GO:0009765 biological_process) (1); membrane (GO:0016020 cellular_component) (1)                                                                                                                                                                                                                                                                                                                                                     | Chlorophyll A-B binding protein, plant (IPR001344) (1); Chlorophyll a/b binding protein domain (IPR023325) (1); Chlorophyll A-B binding protein (IPR022796) (4)                                                                                                                                                     |                                    | C_unihii_00048_mRNA_92.1   | -                           |
| GF0034252 | 0                               | 1                       | 0                        | Hypothetical protein (1)                                                         |                                                                                                                                                                                                                                                                                                                                                                                                                                                                        |                                                                                                                                                                                                                                                                                                                     |                                    | C_unihii_00048_mRNA_89.1   | -                           |
| GF0034251 | 0                               | 1                       | 0                        | Hypothetical protein (1)                                                         |                                                                                                                                                                                                                                                                                                                                                                                                                                                                        |                                                                                                                                                                                                                                                                                                                     |                                    | C_unihii_00048_mRNA_47.1   | -                           |
| GF0034250 | 0                               | 1                       | 0                        | Hypothetical protein (1)                                                         |                                                                                                                                                                                                                                                                                                                                                                                                                                                                        | Askyrin repeat domain-containing protein 13 (IPR021852) (1)                                                                                                                                                                                                                                                         |                                    | C_unihii_00048_mRNA_27.1   | -                           |
| GF0034249 | 0                               | 1                       | 0                        | Hypothetical protein (1)                                                         | protein binding (GO:0005515 molecular_function) (1); regulation of transcription, DNA-dependent (GO:0006355 biological_process) (1); nucleus (GO:0005634 cellular_component) (1)                                                                                                                                                                                                                                                                                       | AUX1AA protein (IPR003311) (1); PBI domain (IPR000270) (1)                                                                                                                                                                                                                                                          |                                    | C_unihii_00047_mRNA_92.1   | -                           |
| GF0034248 | 0                               | 1                       | 0                        | Hypothetical protein (1)                                                         |                                                                                                                                                                                                                                                                                                                                                                                                                                                                        |                                                                                                                                                                                                                                                                                                                     |                                    | C_unihii_00047_mRNA_88.1   | -                           |
| GF0034247 | 0                               | 1                       | 0                        | Hypothetical protein (1)                                                         |                                                                                                                                                                                                                                                                                                                                                                                                                                                                        |                                                                                                                                                                                                                                                                                                                     |                                    | C_unihii_00047_mRNA_73.1   | -                           |
| GF0034246 | 0                               | 1                       | 0                        | Hypothetical protein (1)                                                         |                                                                                                                                                                                                                                                                                                                                                                                                                                                                        |                                                                                                                                                                                                                                                                                                                     |                                    | C_unihii_00047_mRNA_70.1   | -                           |
| GF0034245 | 0                               | 1                       | 0                        | Hypothetical protein (1)                                                         |                                                                                                                                                                                                                                                                                                                                                                                                                                                                        |                                                                                                                                                                                                                                                                                                                     |                                    | C_unihii_00047_mRNA_7.1    | -                           |
| GF0034244 | 0                               | 1                       | 0                        | Hypothetical protein (1)                                                         |                                                                                                                                                                                                                                                                                                                                                                                                                                                                        | Retrotransposon gag domain (IPR005162) (1)                                                                                                                                                                                                                                                                          |                                    | C_unihii_00047_mRNA_6.1    | -                           |
| GF0034243 | 0                               | 1                       | 0                        | Hypothetical protein (1)                                                         |                                                                                                                                                                                                                                                                                                                                                                                                                                                                        |                                                                                                                                                                                                                                                                                                                     |                                    | C_unihii_00047_mRNA_5.1    | -                           |
| GF0034242 | 0                               | 1                       | 0                        | Hypothetical protein (1)                                                         |                                                                                                                                                                                                                                                                                                                                                                                                                                                                        |                                                                                                                                                                                                                                                                                                                     |                                    | C_unihii_00047_mRNA_49.1   | -                           |
| GF0034241 | 0                               | 1                       | 0                        | Hypothetical protein (1)                                                         | protein binding (GO:0005515 molecular_function) (1); signal transduction (GO:0007165 biological_process) (1)                                                                                                                                                                                                                                                                                                                                                           | Toll/interleukin-1 receptor homology (TIR) domain (IPR001871) (1)                                                                                                                                                                                                                                                   |                                    | C_unihii_00047_mRNA_37.1   | -                           |
| GF0034240 | 0                               | 1                       | 0                        | Hypothetical protein (1)                                                         |                                                                                                                                                                                                                                                                                                                                                                                                                                                                        |                                                                                                                                                                                                                                                                                                                     |                                    | C_unihii_00047_mRNA_34.1   | -                           |
| GF0034239 | 0                               | 1                       | 0                        | GPI-anchored protein LORELEI (1)                                                 |                                                                                                                                                                                                                                                                                                                                                                                                                                                                        |                                                                                                                                                                                                                                                                                                                     |                                    | C_unihii_00047_mRNA_31.3   | -                           |
| GF0034238 | 0                               | 1                       | 0                        | Hypothetical protein (1)                                                         |                                                                                                                                                                                                                                                                                                                                                                                                                                                                        |                                                                                                                                                                                                                                                                                                                     |                                    | C_unihii_00047_mRNA_3.1    | -                           |
| GF0034237 | 0                               | 1                       | 0                        | Hypothetical protein (1)                                                         |                                                                                                                                                                                                                                                                                                                                                                                                                                                                        |                                                                                                                                                                                                                                                                                                                     |                                    | C_unihii_00047_mRNA_26.1   | -                           |
| GF0034236 | 0                               | 1                       | 0                        | Hypothetical protein (1)                                                         |                                                                                                                                                                                                                                                                                                                                                                                                                                                                        |                                                                                                                                                                                                                                                                                                                     |                                    | C_unihii_00047_mRNA_24.1   | -                           |
| GF0034235 | 0                               | 1                       | 0                        | Hypothetical protein (1)                                                         | proteolysis (GO:0006508 biological_process) (1); serine-type cathepsin-like activity (GO:0004252 molecular_function) (1)                                                                                                                                                                                                                                                                                                                                               | Peptidase S8, subtilisin-related (IPR015500) (1); Peptidase S8/S53 domain (IPR0000209) (1)                                                                                                                                                                                                                          |                                    | C_unihii_00047_mRNA_2.1    | -                           |
| GF0034234 | 0                               | 1                       | 0                        | Hypothetical protein (1)                                                         |                                                                                                                                                                                                                                                                                                                                                                                                                                                                        |                                                                                                                                                                                                                                                                                                                     |                                    | C_unihii_00047_mRNA_17.1   | -                           |
| GF0034233 | 0                               | 1                       | 0                        | Subtilase family protein, putative (1)                                           | proteolysis (GO:0006508 biological_process) (1); serine-type cathepsin-like activity (GO:0004252 molecular_function) (1)                                                                                                                                                                                                                                                                                                                                               | Peptidase S8, subtilisin-related (IPR015500) (1); Peptidase S8/S53 domain (IPR0000209) (1); PA domain (IPR001171) (1); Peptidase S8 propeptide/protease-inhibitor 9 (IPR010299) (1); Reverse transcriptase, RNA-dependent DNA polymerase (IPR013103) (1); Peptidase S8, subtilisin, Ser-active site (IPR023828) (4) |                                    | C_unihii_00047_mRNA_1.1    | -                           |
| GF0034232 | 0                               | 1                       | 0                        | Hypothetical protein (1)                                                         |                                                                                                                                                                                                                                                                                                                                                                                                                                                                        |                                                                                                                                                                                                                                                                                                                     |                                    | C_unihii_00046_mRNA_9.1    | -                           |
| GF0034231 | 0                               | 1                       | 0                        | Hypothetical protein (1)                                                         |                                                                                                                                                                                                                                                                                                                                                                                                                                                                        |                                                                                                                                                                                                                                                                                                                     |                                    | C_unihii_00046_mRNA_81.1   | -                           |
| GF0034230 | 0                               | 1                       | 0                        | Hypothetical protein (1)                                                         |                                                                                                                                                                                                                                                                                                                                                                                                                                                                        |                                                                                                                                                                                                                                                                                                                     |                                    | C_unihii_00046_mRNA_8.1    | -                           |
| GF0034229 | 0                               | 1                       | 0                        | Hypothetical protein (1)                                                         | nucleic acid binding (GO:0003676 molecular_function) (1)                                                                                                                                                                                                                                                                                                                                                                                                               | Ribonuclease H-like domain (IPR012337) (1)                                                                                                                                                                                                                                                                          |                                    | C_unihii_00046_mRNA_75.1   | -                           |
| GF0034228 | 0                               | 1                       | 0                        | UPTF481 protein (1)                                                              |                                                                                                                                                                                                                                                                                                                                                                                                                                                                        | Protein of unknown function DUF247, plant (IPR004156) (1)                                                                                                                                                                                                                                                           |                                    | C_unihii_00046_mRNA_60.1   | -                           |
| GF0034227 | 0                               | 1                       | 0                        | DNA repair DNA-dependent ATPase RecA (1)                                         | DNA repair (GO:0006281 biological_process) (1); DNA binding (GO:0003677 molecular_function) (1); DNA-dependent ATPase activity (GO:0008094 molecular_function) (1); SOS response (GO:0009432 biological_process) (1); ATP binding (GO:0005524 molecular_function) (1); single-stranded DNA binding (GO:0003697 molecular_function) (1)                                                                                                                                 | DNA recombination and repair protein RecA (IPR013765) (1); DNA recombination and repair protein RecA-like, ATP-binding domain (IPR020588) (1); P-loop containing nucleoside triphosphate hydrolase (IPR027471) (1)                                                                                                  |                                    | C_unihii_00046_mRNA_6.1    | -                           |
| GF0034226 | 0                               | 1                       | 0                        | Hypothetical protein (1)                                                         |                                                                                                                                                                                                                                                                                                                                                                                                                                                                        | Protein of unknown function DUF247, plant (IPR004156) (1)                                                                                                                                                                                                                                                           |                                    | C_unihii_00046_mRNA_59.1   | -                           |
| GF0034225 | 0                               | 1                       | 0                        | Hypothetical protein (1)                                                         |                                                                                                                                                                                                                                                                                                                                                                                                                                                                        |                                                                                                                                                                                                                                                                                                                     |                                    | C_unihii_00046_mRNA_58.1   | -                           |
| GF0034224 | 0                               | 1                       | 0                        | Hypothetical protein (1)                                                         |                                                                                                                                                                                                                                                                                                                                                                                                                                                                        |                                                                                                                                                                                                                                                                                                                     |                                    | C_unihii_00046_mRNA_50.1   | -                           |
| GF0034223 | 0                               | 1                       | 0                        | Hypothetical protein (1)                                                         |                                                                                                                                                                                                                                                                                                                                                                                                                                                                        |                                                                                                                                                                                                                                                                                                                     |                                    | C_unihii_00046_mRNA_5.1    | -                           |
| GF0034222 | 0                               | 1                       | 0                        | Iron-sulfur cluster assembly protein, putative (1)                               | iron-sulfur cluster binding (GO:0051536 molecular_function) (1); iron-sulfur cluster assembly (GO:0016226 biological_process) (1); structural molecule activity (GO:0009198 molecular_function) (1)                                                                                                                                                                                                                                                                    | FeS cluster biogenesis (IPR000061) (1); FeS cluster insertion protein (IPR016092) (1); FeS cluster insertion, C-terminal, conserved site (IPR017870) (1)                                                                                                                                                            |                                    | C_unihii_00046_mRNA_49.1   | -                           |
| GF0034221 | 0                               | 1                       | 0                        | Hypothetical protein (1)                                                         |                                                                                                                                                                                                                                                                                                                                                                                                                                                                        | Metallo-dependent phosphatase-like (IPR020821) (1); Isovincetamide purple acid phosphatase-like C-terminal domain (IPR025733) (4)                                                                                                                                                                                   |                                    | C_unihii_00046_mRNA_40.1   | -                           |
| GF0034220 | 0                               | 1                       | 0                        | Hypothetical protein (1)                                                         |                                                                                                                                                                                                                                                                                                                                                                                                                                                                        |                                                                                                                                                                                                                                                                                                                     |                                    | C_unihii_00046_mRNA_4.1    | -                           |

| ID        | Num. in <i>C. crottensteini</i> | Num. in <i>C. caudata</i> | Num. in <i>P. putida</i> | Note                                                        | GO                                                                                                                                                                                                                                                                                                                                                                                                                                                                                         | InterPro                                                                                                                                                                                                                                                               | Members in <i>C. crottensteini</i> | Members in <i>C. caudata</i> | Members in <i>P. putida</i> |
|-----------|---------------------------------|---------------------------|--------------------------|-------------------------------------------------------------|--------------------------------------------------------------------------------------------------------------------------------------------------------------------------------------------------------------------------------------------------------------------------------------------------------------------------------------------------------------------------------------------------------------------------------------------------------------------------------------------|------------------------------------------------------------------------------------------------------------------------------------------------------------------------------------------------------------------------------------------------------------------------|------------------------------------|------------------------------|-----------------------------|
| GF0034219 | 0                               | 1                         | 1                        | NAD(P)H-quinone oxidoreductase subunit K, chloroplastic (1) | 4 iron, 4 sulfur cluster binding [GO:001539 molecular_function] (1); iron-sulfur cluster binding [GO:001536 molecular_function] (1); NADH dehydrogenase (ubiquinone) activity [GO:0008137 molecular_function] (1); oxidation-reduction process [GO:0055114 biological_process] (1); quinone binding [GO:0048038 molecular_function] (1)                                                                                                                                                    | NADH-ubiquinone oxidoreductase, 20 kDa subunit [IPRO00381] (1); NADH-ubiquinone oxidoreductase-like, 20kDa subunit [IPRO06137] (1)                                                                                                                                     | C_unihit_00046_mRNA_30.1           | -                            | -                           |
| GF0034218 | 0                               | 1                         | 1                        | Hypothetical protein (1)                                    |                                                                                                                                                                                                                                                                                                                                                                                                                                                                                            |                                                                                                                                                                                                                                                                        |                                    | C_unihit_00046_mRNA_2.1      | -                           |
| GF0034217 | 0                               | 1                         | 1                        | Hypothetical protein (1)                                    |                                                                                                                                                                                                                                                                                                                                                                                                                                                                                            |                                                                                                                                                                                                                                                                        |                                    | C_unihit_00045_mRNA_92.1     | -                           |
| GF0034216 | 0                               | 1                         | 1                        | Hypothetical protein (1)                                    |                                                                                                                                                                                                                                                                                                                                                                                                                                                                                            |                                                                                                                                                                                                                                                                        |                                    | C_unihit_00045_mRNA_84.1     | -                           |
| GF0034215 | 0                               | 1                         | 1                        | Hypothetical protein (1)                                    |                                                                                                                                                                                                                                                                                                                                                                                                                                                                                            |                                                                                                                                                                                                                                                                        |                                    | C_unihit_00045_mRNA_82.1     | -                           |
| GF0034214 | 0                               | 1                         | 1                        | Hypothetical protein (1)                                    |                                                                                                                                                                                                                                                                                                                                                                                                                                                                                            |                                                                                                                                                                                                                                                                        |                                    | C_unihit_00045_mRNA_69.1     | -                           |
| GF0034213 | 0                               | 1                         | 1                        | Hypothetical protein (1)                                    |                                                                                                                                                                                                                                                                                                                                                                                                                                                                                            |                                                                                                                                                                                                                                                                        |                                    | C_unihit_00045_mRNA_62.1     | -                           |
| GF0034212 | 0                               | 1                         | 1                        | Hypothetical protein (1)                                    |                                                                                                                                                                                                                                                                                                                                                                                                                                                                                            |                                                                                                                                                                                                                                                                        |                                    | C_unihit_00045_mRNA_19.1     | -                           |
| GF0034211 | 0                               | 1                         | 1                        | Hypothetical protein (1)                                    |                                                                                                                                                                                                                                                                                                                                                                                                                                                                                            |                                                                                                                                                                                                                                                                        |                                    | C_unihit_00045_mRNA_18.1     | -                           |
| GF0034210 | 0                               | 1                         | 1                        | Hypothetical protein (1)                                    | carbohydrate binding [GO:0030246 molecular_function] (1)                                                                                                                                                                                                                                                                                                                                                                                                                                   | Concavulin A-like lectin/glycanase domain [IPRO13320] (1); Legume lectin domain [IPRO1220] (1)                                                                                                                                                                         |                                    | C_unihit_00044_mRNA_47.1     | -                           |
| GF0034209 | 0                               | 1                         | 1                        | Hypothetical protein (1)                                    |                                                                                                                                                                                                                                                                                                                                                                                                                                                                                            |                                                                                                                                                                                                                                                                        |                                    | C_unihit_00044_mRNA_40.1     | -                           |
| GF0034208 | 0                               | 1                         | 1                        | Hypothetical protein (1)                                    | RNA-DNA hybrid ribonuclease activity [GO:0004253 molecular_function] (1); nucleic acid binding [GO:0003676 molecular_function] (1)                                                                                                                                                                                                                                                                                                                                                         | Ribonuclease H domain [IPRO02156] (1); Ribonuclease H-like domain [IPRO12337] (1)                                                                                                                                                                                      |                                    | C_unihit_00044_mRNA_4.1      | -                           |
| GF0034207 | 0                               | 1                         | 1                        | Hypothetical protein (1)                                    |                                                                                                                                                                                                                                                                                                                                                                                                                                                                                            |                                                                                                                                                                                                                                                                        |                                    | C_unihit_00044_mRNA_31.1     | -                           |
| GF0034206 | 0                               | 1                         | 1                        | Monosaccharide transport protein (1)                        |                                                                                                                                                                                                                                                                                                                                                                                                                                                                                            |                                                                                                                                                                                                                                                                        |                                    | C_unihit_00044_mRNA_29.1     | -                           |
| GF0034205 | 0                               | 1                         | 1                        | Hypothetical protein (1)                                    |                                                                                                                                                                                                                                                                                                                                                                                                                                                                                            |                                                                                                                                                                                                                                                                        |                                    | C_unihit_00044_mRNA_19.1     | -                           |
| GF0034204 | 0                               | 1                         | 1                        | Hypothetical protein (1)                                    |                                                                                                                                                                                                                                                                                                                                                                                                                                                                                            |                                                                                                                                                                                                                                                                        |                                    | C_unihit_00044_mRNA_18.1     | -                           |
| GF0034203 | 0                               | 1                         | 1                        | Pectate lyase (1)                                           | pectate lyase activity [GO:0003070 molecular_function] (1)                                                                                                                                                                                                                                                                                                                                                                                                                                 | AmbA/lyase [IPRO18082] (1); Pectin lyase-like [IPRO12332] (1); Pectate lyase/Amb lyase [IPRO2022] (1); Pectate lyase, N-terminal [IPRO7524] (1); Pectin lyase-like/lyase factor [IPRO11050] (1)                                                                        |                                    | C_unihit_00044_mRNA_11.1     | -                           |
| GF0034202 | 0                               | 1                         | 1                        | Hypothetical protein (1)                                    |                                                                                                                                                                                                                                                                                                                                                                                                                                                                                            |                                                                                                                                                                                                                                                                        |                                    | C_unihit_00044_mRNA_10.1     | -                           |
| GF0034201 | 0                               | 1                         | 1                        | Hypothetical protein (1)                                    | transferase activity, transferring acyl groups other than amino-acyl groups [GO:0016747 molecular_function] (1)                                                                                                                                                                                                                                                                                                                                                                            | Chloramphenicol acetyltransferase-like domain [IPRO2213] (1); Transferase [IPRO03480] (4)                                                                                                                                                                              |                                    | C_unihit_00044_mRNA_1.1      | -                           |
| GF0034200 | 0                               | 1                         | 1                        | Hypothetical protein (1)                                    | nucleus [GO:0005634 cellular_component] (1); nucleic acid binding [GO:0003676 molecular_function] (1)                                                                                                                                                                                                                                                                                                                                                                                      | Ribonuclease H-like domain [IPRO12337] (1); Ubiquitin-conjugating enzyme E2 [IPRO00608] (1); Ubiquitin-conjugating enzyme RWD-like [IPRO16135] (1); Ribonuclease CA1 [IPRO06041] (1)                                                                                   |                                    | C_unihit_00044_mRNA_79.1     | -                           |
| GF0034199 | 0                               | 1                         | 1                        | Hypothetical protein (1)                                    |                                                                                                                                                                                                                                                                                                                                                                                                                                                                                            |                                                                                                                                                                                                                                                                        |                                    | C_unihit_00043_mRNA_52.1     | -                           |
| GF0034198 | 0                               | 1                         | 1                        | Hypothetical protein (1)                                    |                                                                                                                                                                                                                                                                                                                                                                                                                                                                                            |                                                                                                                                                                                                                                                                        |                                    | C_unihit_00043_mRNA_51.1     | -                           |
| GF0034197 | 0                               | 1                         | 1                        | Hypothetical protein (1)                                    |                                                                                                                                                                                                                                                                                                                                                                                                                                                                                            |                                                                                                                                                                                                                                                                        |                                    | C_unihit_00043_mRNA_41.1     | -                           |
| GF0034196 | 0                               | 1                         | 1                        | Hypothetical protein (1)                                    |                                                                                                                                                                                                                                                                                                                                                                                                                                                                                            |                                                                                                                                                                                                                                                                        |                                    | C_unihit_00043_mRNA_35.1     | -                           |
| GF0034195 | 0                               | 1                         | 1                        | Hypothetical protein (1)                                    | cysteine-type peptidase activity [GO:0005234 molecular_function] (1); proteolysis [GO:0006508 biological_process] (1)                                                                                                                                                                                                                                                                                                                                                                      | Domain of unknown function DUF1985 [IPRO15410] (1); Upi protease family, C-terminal catalytic domain [IPRO03653] (1)                                                                                                                                                   |                                    | C_unihit_00043_mRNA_19.1     | -                           |
| GF0034194 | 0                               | 1                         | 1                        | Zn <sup>2+</sup> finger containing protein, putative (1)    | zinc ion binding [GO:0008270 molecular_function] (1)                                                                                                                                                                                                                                                                                                                                                                                                                                       | Zinc finger, PAM2-type [IPRO06064] (1)                                                                                                                                                                                                                                 |                                    | C_unihit_00043_mRNA_18.1     | -                           |
| GF0034193 | 0                               | 1                         | 1                        | Hypothetical protein (1)                                    |                                                                                                                                                                                                                                                                                                                                                                                                                                                                                            |                                                                                                                                                                                                                                                                        |                                    | C_unihit_00043_mRNA_17.1     | -                           |
| GF0034192 | 0                               | 1                         | 1                        | Hypothetical protein (1)                                    |                                                                                                                                                                                                                                                                                                                                                                                                                                                                                            |                                                                                                                                                                                                                                                                        |                                    | C_unihit_00043_mRNA_16.1     | -                           |
| GF0034191 | 0                               | 1                         | 1                        | Dihydroxymephol-4-reductase (1)                             | catalytic activity [GO:0003824 molecular_function] (1); coenzyme binding [GO:0005662 molecular_function] (1)                                                                                                                                                                                                                                                                                                                                                                               | NAD-dependent epimerase/dehydratase, N-terminal domain [IPRO15491] (1); NAD(P)-binding domain [IPRO10460] (1)                                                                                                                                                          |                                    | C_unihit_00042_mRNA_9.1      | -                           |
| GF0034190 | 0                               | 1                         | 1                        | Naringenin-chalcone synthase (1)                            | catalytic activity [GO:0003824 molecular_function] (1); metabolic process [GO:0008152 biological_process] (1)                                                                                                                                                                                                                                                                                                                                                                              | Thiolase-like [IPRO10409] (1); Chalcone-synthase synthase, N-terminal [IPRO01099] (1)                                                                                                                                                                                  |                                    | C_unihit_00042_mRNA_8.1      | -                           |
| GF0034189 | 0                               | 1                         | 1                        | Hypothetical protein (1)                                    | protein binding [GO:0005515 molecular_function] (1)                                                                                                                                                                                                                                                                                                                                                                                                                                        | Leucine-rich repeat domain, I, domain-like [IPRO23257] (1); Leucine-rich repeat [IPRO01611] (1)                                                                                                                                                                        |                                    | C_unihit_00042_mRNA_78.1     | -                           |
| GF0034188 | 0                               | 1                         | 1                        | Hypothetical protein (1)                                    |                                                                                                                                                                                                                                                                                                                                                                                                                                                                                            |                                                                                                                                                                                                                                                                        |                                    | C_unihit_00042_mRNA_75.1     | -                           |
| GF0034187 | 0                               | 1                         | 1                        | Hypothetical protein (1)                                    | metabolic process [GO:0008152 biological_process] (1); catalytic activity [GO:0003824 molecular_function] (1)                                                                                                                                                                                                                                                                                                                                                                              | Thiolase-like [IPRO10409] (1); Chalcone-synthase synthase, C-terminal [IPRO12328] (1)                                                                                                                                                                                  |                                    | C_unihit_00042_mRNA_7.1      | -                           |
| GF0034186 | 0                               | 1                         | 1                        | Rhamnogalacturonate lyase (1)                               | carbohydrate binding [GO:0030246 molecular_function] (1); carbohydrate metabolic process [GO:0005975 biological_process] (1); catalytic activity [GO:0003824 molecular_function] (1)                                                                                                                                                                                                                                                                                                       | Galactose-binding domain-like [IPRO08979] (1); Galactose mutarotase-like domain [IPRO11013] (1); Rhamnogalacturonate lyase, domain III [IPRO2941] (1); Rhamnogalacturonate lyase [IPRO10325] (1)                                                                       |                                    | C_unihit_00042_mRNA_64.1     | -                           |
| GF0034185 | 0                               | 1                         | 1                        | Hypothetical protein (1)                                    |                                                                                                                                                                                                                                                                                                                                                                                                                                                                                            |                                                                                                                                                                                                                                                                        |                                    | C_unihit_00042_mRNA_62.1     | -                           |
| GF0034184 | 0                               | 1                         | 1                        | Hypothetical protein (1)                                    |                                                                                                                                                                                                                                                                                                                                                                                                                                                                                            |                                                                                                                                                                                                                                                                        |                                    | C_unihit_00042_mRNA_53.1     | -                           |
| GF0034183 | 0                               | 1                         | 1                        | Hypothetical protein (1)                                    |                                                                                                                                                                                                                                                                                                                                                                                                                                                                                            |                                                                                                                                                                                                                                                                        |                                    | C_unihit_00042_mRNA_49.1     | -                           |
| GF0034182 | 0                               | 1                         | 1                        | Phosphoglycerate mutase family protein (1)                  | catalytic activity [GO:0003824 molecular_function] (1); metabolic process [GO:0008152 biological_process] (1)                                                                                                                                                                                                                                                                                                                                                                              | Histidine phosphatase superfamily [IPRO20313] (1); Phosphoglycerate/bisphosphoglycerate mutase, active site [IPRO01345] (1); Histidine phosphatase superfamily, shade-1 [IPRO13078] (1)                                                                                |                                    | C_unihit_00042_mRNA_43.1     | -                           |
| GF0034181 | 0                               | 1                         | 1                        | Auxin-responsive protein IAA16 (1)                          | nucleus [GO:0005634 cellular_component] (1); regulation of transcription, DNA-templated [GO:0005555 biological_process] (1); protein binding [GO:0005515 molecular_function] (1)                                                                                                                                                                                                                                                                                                           | PBI domain [IPRO00270] (1); AUX/IAA protein [IPRO03311] (1)                                                                                                                                                                                                            |                                    | C_unihit_00042_mRNA_39.1     | -                           |
| GF0034180 | 0                               | 1                         | 1                        | Hypothetical protein (1)                                    |                                                                                                                                                                                                                                                                                                                                                                                                                                                                                            |                                                                                                                                                                                                                                                                        |                                    | C_unihit_00042_mRNA_37.1     | -                           |
| GF0034179 | 0                               | 1                         | 1                        | Phosphoenolpyruvate carboxykinase (ATP) (1)                 | gluconeogenesis [GO:0006094 biological_process] (1); purine nucleotide binding [GO:0017076 molecular_function] (1); ATP binding [GO:0005234 molecular_function] (1); phosphoenolpyruvate carboxykinase activity [GO:0006461 molecular_function] (1); phosphoenolpyruvate carboxykinase (ATP) activity [GO:0006462 molecular_function] (1)                                                                                                                                                  | Phosphoenolpyruvate carboxykinase, N-terminal [IPRO0210] (1); Phosphoenolpyruvate carboxykinase (ATP), conserved site [IPRO15994] (1); Phosphoenolpyruvate carboxykinase, ATP-utilising [IPRO01272] (1); Phosphoenolpyruvate carboxykinase, C-terminal [IPRO15053] (1) |                                    | C_unihit_00042_mRNA_35.1     | -                           |
| GF0034178 | 0                               | 1                         | 1                        | Hypothetical protein (1)                                    | protein binding [GO:0005515 molecular_function] (1)                                                                                                                                                                                                                                                                                                                                                                                                                                        | Leucine-rich repeat [IPRO01611] (1); Leucine-rich repeat domain, I, domain-like [IPRO23257] (1)                                                                                                                                                                        |                                    | C_unihit_00042_mRNA_33.1     | -                           |
| GF0034177 | 0                               | 1                         | 1                        | Hypothetical protein (1)                                    |                                                                                                                                                                                                                                                                                                                                                                                                                                                                                            |                                                                                                                                                                                                                                                                        |                                    | C_unihit_00042_mRNA_3.1      | -                           |
| GF0034176 | 0                               | 1                         | 1                        | Hypothetical protein (1)                                    |                                                                                                                                                                                                                                                                                                                                                                                                                                                                                            |                                                                                                                                                                                                                                                                        |                                    | C_unihit_00042_mRNA_27.1     | -                           |
| GF0034175 | 0                               | 1                         | 1                        | Hypothetical protein (1)                                    | protein kinase activity [GO:0004672 molecular_function] (1); protein phosphorylation [GO:0006468 biological_process] (1); ATP binding [GO:0005234 molecular_function] (1)                                                                                                                                                                                                                                                                                                                  | Leucine-rich repeat domain, I, domain-like [IPRO23257] (1); Protein kinase-like domain [IPRO11099] (1); Protein kinase, ATP binding site [IPRO17441] (1); Serine-threonine tyrosine-protein kinase catalytic domain [IPRO01245] (1)                                    |                                    | C_unihit_00042_mRNA_26.1     | -                           |
| GF0034174 | 0                               | 1                         | 1                        | Hypothetical protein (1)                                    |                                                                                                                                                                                                                                                                                                                                                                                                                                                                                            |                                                                                                                                                                                                                                                                        |                                    | C_unihit_00042_mRNA_15.1     | -                           |
| GF0034173 | 0                               | 1                         | 1                        | Hypothetical protein (1)                                    |                                                                                                                                                                                                                                                                                                                                                                                                                                                                                            |                                                                                                                                                                                                                                                                        |                                    | C_unihit_00042_mRNA_14.1     | -                           |
| GF0034172 | 0                               | 1                         | 1                        | Hypothetical protein (1)                                    |                                                                                                                                                                                                                                                                                                                                                                                                                                                                                            |                                                                                                                                                                                                                                                                        |                                    | C_unihit_00042_mRNA_12.1     | -                           |
| GF0034171 | 0                               | 1                         | 1                        | Hypothetical protein (1)                                    | steroid biosynthetic process [GO:0006094 biological_process] (1); 3-beta-hydroxy-delta-steroid dehydrogenase activity [GO:0003854 molecular_function] (1); oxidation-reduction process [GO:0055114 biological_process] (1); oxidoreductase activity, acting on the CH-OH group of donors, NAD or NADP as acceptor [GO:0016616 molecular_function] (1)                                                                                                                                      | NAD(P)-binding domain [IPRO16940] (1); Domain of unknown function [IPRO22398] (1); 3-beta-hydroxysteroid dehydrogenase/oxidoreductase [IPRO02252] (1)                                                                                                                  |                                    | C_unihit_00042_mRNA_11.1     | -                           |
| GF0034170 | 0                               | 1                         | 1                        | Hypothetical protein (1)                                    |                                                                                                                                                                                                                                                                                                                                                                                                                                                                                            |                                                                                                                                                                                                                                                                        |                                    | C_unihit_00042_mRNA_1.1      | -                           |
| GF0034169 | 0                               | 1                         | 1                        | Hypothetical protein (1)                                    |                                                                                                                                                                                                                                                                                                                                                                                                                                                                                            |                                                                                                                                                                                                                                                                        |                                    | C_unihit_00041_mRNA_94.1     | -                           |
| GF0034168 | 0                               | 1                         | 1                        | Hypothetical protein (1)                                    | spindle pole [GO:0000922 cellular_component] (1); microtubule cytoskeleton organization [GO:0000226 biological_process] (1); microtubule organizing center [GO:0005915 cellular_component] (1); positive regulation of microtubule nucleation [GO:0009603 biological_process] (1); membrane [GO:0016020 cellular_component] (1); amino acid transmembrane transport [GO:0003333 biological_process] (1); amino acid transmembrane transporter activity [GO:0015171 molecular_function] (1) | Gamma-tubulin complex component protein [IPRO07259] (1)                                                                                                                                                                                                                |                                    | C_unihit_00041_mRNA_76.1     | -                           |
| GF0034167 | 0                               | 1                         | 1                        | Amino acid permease family protein (1)                      |                                                                                                                                                                                                                                                                                                                                                                                                                                                                                            |                                                                                                                                                                                                                                                                        |                                    | C_unihit_00041_mRNA_72.1     | -                           |
| GF0034166 | 0                               | 1                         | 1                        | Hypothetical protein (1)                                    |                                                                                                                                                                                                                                                                                                                                                                                                                                                                                            |                                                                                                                                                                                                                                                                        |                                    | C_unihit_00041_mRNA_55.1     | -                           |
| GF0034165 | 0                               | 1                         | 1                        | Hypothetical protein (1)                                    | metabolic process [GO:0008152 biological_process] (1); transferase activity, transferring hexoyl groups [GO:0016758 molecular_function] (1)                                                                                                                                                                                                                                                                                                                                                | UDP-glucanose/UDP-glucosyltransferase [IPRO02213] (1)                                                                                                                                                                                                                  |                                    | C_unihit_00041_mRNA_54.1     | -                           |
| GF0034164 | 0                               | 1                         | 1                        | Hypothetical protein (1)                                    |                                                                                                                                                                                                                                                                                                                                                                                                                                                                                            |                                                                                                                                                                                                                                                                        |                                    | C_unihit_00041_mRNA_5.1      | -                           |
| GF0034163 | 0                               | 1                         | 1                        | shikimate/quinate hydroxymethyltransferase (1)              | transferase activity, transferring acyl groups other than amino-acyl groups [GO:0016747 molecular_function] (1)                                                                                                                                                                                                                                                                                                                                                                            | Chloramphenicol acetyltransferase-like domain [IPRO2213] (1); Transferase [IPRO03480] (4)                                                                                                                                                                              |                                    | C_unihit_00041_mRNA_47.1     | -                           |

| ID        | Num. in <i>C. crotolariae</i> | Num. in <i>C. arabidis</i> | Num. in <i>P. trifolium</i> | Note                                                        | GO                                                                                                                                                                                                                                                                                                                                                                                                                                                                                                                                                                                                                                                                                                                                                    | InterPro                                                                                                                                                                                                                                                                                                                                                                                                                                                                                                                                                                                              | Members in <i>C. crotolariae</i> | Members in <i>C. arabidis</i> | Members in <i>P. trifolium</i> |
|-----------|-------------------------------|----------------------------|-----------------------------|-------------------------------------------------------------|-------------------------------------------------------------------------------------------------------------------------------------------------------------------------------------------------------------------------------------------------------------------------------------------------------------------------------------------------------------------------------------------------------------------------------------------------------------------------------------------------------------------------------------------------------------------------------------------------------------------------------------------------------------------------------------------------------------------------------------------------------|-------------------------------------------------------------------------------------------------------------------------------------------------------------------------------------------------------------------------------------------------------------------------------------------------------------------------------------------------------------------------------------------------------------------------------------------------------------------------------------------------------------------------------------------------------------------------------------------------------|----------------------------------|-------------------------------|--------------------------------|
| GF0034162 | 0                             | 1                          | 1                           | 0 Hypothetical protein (1)                                  |                                                                                                                                                                                                                                                                                                                                                                                                                                                                                                                                                                                                                                                                                                                                                       |                                                                                                                                                                                                                                                                                                                                                                                                                                                                                                                                                                                                       |                                  | C_unihb_00041_mRNA_40.1       | -                              |
| GF0034161 | 0                             | 1                          | 1                           | 0 Hypothetical protein (1)                                  |                                                                                                                                                                                                                                                                                                                                                                                                                                                                                                                                                                                                                                                                                                                                                       |                                                                                                                                                                                                                                                                                                                                                                                                                                                                                                                                                                                                       |                                  | C_unihb_00041_mRNA_4.1        | -                              |
| GF0034160 | 0                             | 1                          | 1                           | 0 Hypothetical protein (1)                                  |                                                                                                                                                                                                                                                                                                                                                                                                                                                                                                                                                                                                                                                                                                                                                       |                                                                                                                                                                                                                                                                                                                                                                                                                                                                                                                                                                                                       |                                  | C_unihb_00041_mRNA_37.1       | -                              |
| GF0034159 | 0                             | 1                          | 0                           | 0 Auxin-responsive protein SAUR61 (1)                       | response to auxin [GO:0009733 biological_process] (1)                                                                                                                                                                                                                                                                                                                                                                                                                                                                                                                                                                                                                                                                                                 | Small auxin-up RNA [IPR002676] (1)                                                                                                                                                                                                                                                                                                                                                                                                                                                                                                                                                                    |                                  | C_unihb_00041_mRNA_35.1       | -                              |
| GF0034158 | 0                             | 1                          | 0                           | 0 Lysine histidine transporter 1 (1)                        |                                                                                                                                                                                                                                                                                                                                                                                                                                                                                                                                                                                                                                                                                                                                                       | Amino acid transporter, transmembrane domain [IPR013057] (1)                                                                                                                                                                                                                                                                                                                                                                                                                                                                                                                                          |                                  | C_unihb_00041_mRNA_31.1       | -                              |
| GF0034157 | 0                             | 1                          | 0                           | 0 Hypothetical protein (1)                                  |                                                                                                                                                                                                                                                                                                                                                                                                                                                                                                                                                                                                                                                                                                                                                       |                                                                                                                                                                                                                                                                                                                                                                                                                                                                                                                                                                                                       |                                  | C_unihb_00041_mRNA_1.1        | -                              |
| GF0034156 | 0                             | 1                          | 0                           | 0 Hypothetical protein (1)                                  |                                                                                                                                                                                                                                                                                                                                                                                                                                                                                                                                                                                                                                                                                                                                                       |                                                                                                                                                                                                                                                                                                                                                                                                                                                                                                                                                                                                       |                                  | C_unihb_00040_mRNA_9.1        | -                              |
| GF0034155 | 0                             | 1                          | 0                           | 0 Hypothetical protein (1)                                  |                                                                                                                                                                                                                                                                                                                                                                                                                                                                                                                                                                                                                                                                                                                                                       |                                                                                                                                                                                                                                                                                                                                                                                                                                                                                                                                                                                                       |                                  | C_unihb_00040_mRNA_8.1        | -                              |
| GF0034154 | 0                             | 1                          | 0                           | 0 Ankyrin repeat protein (1)                                |                                                                                                                                                                                                                                                                                                                                                                                                                                                                                                                                                                                                                                                                                                                                                       | PGC domain [IPR026961] (1); Ankyrin repeat-containing domain [IPR020683] (1)                                                                                                                                                                                                                                                                                                                                                                                                                                                                                                                          |                                  | C_unihb_00040_mRNA_7.1        | -                              |
| GF0034153 | 0                             | 1                          | 0                           | 0 Hypothetical protein (1)                                  |                                                                                                                                                                                                                                                                                                                                                                                                                                                                                                                                                                                                                                                                                                                                                       |                                                                                                                                                                                                                                                                                                                                                                                                                                                                                                                                                                                                       |                                  | C_unihb_00040_mRNA_68.1       | -                              |
| GF0034152 | 0                             | 1                          | 0                           | 0 Hypothetical protein (1)                                  |                                                                                                                                                                                                                                                                                                                                                                                                                                                                                                                                                                                                                                                                                                                                                       |                                                                                                                                                                                                                                                                                                                                                                                                                                                                                                                                                                                                       |                                  | C_unihb_00040_mRNA_58.1       | -                              |
| GF0034151 | 0                             | 1                          | 0                           | 0 Hypothetical protein (1)                                  |                                                                                                                                                                                                                                                                                                                                                                                                                                                                                                                                                                                                                                                                                                                                                       |                                                                                                                                                                                                                                                                                                                                                                                                                                                                                                                                                                                                       |                                  | C_unihb_00040_mRNA_54.1       | -                              |
| GF0034150 | 0                             | 1                          | 0                           | 0 Hypothetical protein (1)                                  |                                                                                                                                                                                                                                                                                                                                                                                                                                                                                                                                                                                                                                                                                                                                                       |                                                                                                                                                                                                                                                                                                                                                                                                                                                                                                                                                                                                       |                                  | C_unihb_00040_mRNA_52.1       | -                              |
| GF0034149 | 0                             | 1                          | 0                           | 0 Hypothetical protein (1)                                  |                                                                                                                                                                                                                                                                                                                                                                                                                                                                                                                                                                                                                                                                                                                                                       |                                                                                                                                                                                                                                                                                                                                                                                                                                                                                                                                                                                                       |                                  | C_unihb_00040_mRNA_47.1       | -                              |
| GF0034148 | 0                             | 1                          | 0                           | 0 Hypothetical protein (1)                                  |                                                                                                                                                                                                                                                                                                                                                                                                                                                                                                                                                                                                                                                                                                                                                       |                                                                                                                                                                                                                                                                                                                                                                                                                                                                                                                                                                                                       |                                  | C_unihb_00040_mRNA_46.1       | -                              |
| GF0034147 | 0                             | 1                          | 0                           | 0 Hypothetical protein (1)                                  |                                                                                                                                                                                                                                                                                                                                                                                                                                                                                                                                                                                                                                                                                                                                                       |                                                                                                                                                                                                                                                                                                                                                                                                                                                                                                                                                                                                       |                                  | C_unihb_00040_mRNA_45.1       | -                              |
| GF0034146 | 0                             | 1                          | 0                           | 0 Hypothetical protein (1)                                  |                                                                                                                                                                                                                                                                                                                                                                                                                                                                                                                                                                                                                                                                                                                                                       |                                                                                                                                                                                                                                                                                                                                                                                                                                                                                                                                                                                                       |                                  | C_unihb_00040_mRNA_44.1       | -                              |
| GF0034145 | 0                             | 1                          | 0                           | 0 Hypothetical protein (1)                                  |                                                                                                                                                                                                                                                                                                                                                                                                                                                                                                                                                                                                                                                                                                                                                       |                                                                                                                                                                                                                                                                                                                                                                                                                                                                                                                                                                                                       |                                  | C_unihb_00040_mRNA_42.1       | -                              |
| GF0034144 | 0                             | 1                          | 0                           | 0 Hypothetical protein (1)                                  |                                                                                                                                                                                                                                                                                                                                                                                                                                                                                                                                                                                                                                                                                                                                                       |                                                                                                                                                                                                                                                                                                                                                                                                                                                                                                                                                                                                       |                                  | C_unihb_00040_mRNA_41.1       | -                              |
| GF0034143 | 0                             | 1                          | 0                           | 0 Hypothetical protein (1)                                  |                                                                                                                                                                                                                                                                                                                                                                                                                                                                                                                                                                                                                                                                                                                                                       |                                                                                                                                                                                                                                                                                                                                                                                                                                                                                                                                                                                                       |                                  | C_unihb_00040_mRNA_4.1        | -                              |
| GF0034142 | 0                             | 1                          | 0                           | 0 Hypothetical protein (1)                                  | DNA binding [GO:0003477 molecular_function] (1); ribonucleoside binding [GO:0032449 molecular_function] (1); DNA-directed RNA polymerase activity [GO:0003899 molecular_function] (1); transcription, DNA-templated [GO:0006351 biological_process] (1)                                                                                                                                                                                                                                                                                                                                                                                                                                                                                               | RNA polymerase, beta subunit, conserved site [IPR007121] (1); DNA-directed RNA polymerase, subunit 2 [IPR015712] (1); RNA polymerase, N-terminal [IPR006592] (1); RNA polymerase, alpha subunit [IPR00721] (1); RNA polymerase Rpb2, domain 1 [IPR007641] (1); DNA-directed RNA polymerase, subunit 2, domain 4 [IPR017201] (1); RNA polymerase Rpb2, OB-6dd [IPR014724] (1); RNA polymerase Rpb1, domain 1 [IPR007080] (1); RNA polymerase Rpb1, domain 3 [IPR007066] (1)                                                                                                                            |                                  | C_unihb_00040_mRNA_36.1       | -                              |
| GF0034141 | 0                             | 1                          | 0                           | 0 Hypothetical protein (1)                                  |                                                                                                                                                                                                                                                                                                                                                                                                                                                                                                                                                                                                                                                                                                                                                       |                                                                                                                                                                                                                                                                                                                                                                                                                                                                                                                                                                                                       |                                  | C_unihb_00040_mRNA_33.1       | -                              |
| GF0034140 | 0                             | 1                          | 0                           | 0 Hypothetical protein (1)                                  |                                                                                                                                                                                                                                                                                                                                                                                                                                                                                                                                                                                                                                                                                                                                                       | Arabidopsis retrotransposon Orf1 [IPR04312] (1)                                                                                                                                                                                                                                                                                                                                                                                                                                                                                                                                                       |                                  | C_unihb_00040_mRNA_31.1       | -                              |
| GF0034139 | 0                             | 1                          | 0                           | 0 Hypothetical protein (1)                                  |                                                                                                                                                                                                                                                                                                                                                                                                                                                                                                                                                                                                                                                                                                                                                       |                                                                                                                                                                                                                                                                                                                                                                                                                                                                                                                                                                                                       |                                  | C_unihb_00040_mRNA_30.1       | -                              |
| GF0034138 | 0                             | 1                          | 0                           | 0 Hypothetical protein (1)                                  |                                                                                                                                                                                                                                                                                                                                                                                                                                                                                                                                                                                                                                                                                                                                                       |                                                                                                                                                                                                                                                                                                                                                                                                                                                                                                                                                                                                       |                                  | C_unihb_00040_mRNA_27.1       | -                              |
| GF0034137 | 0                             | 1                          | 0                           | 0 Hypothetical protein (1)                                  |                                                                                                                                                                                                                                                                                                                                                                                                                                                                                                                                                                                                                                                                                                                                                       |                                                                                                                                                                                                                                                                                                                                                                                                                                                                                                                                                                                                       |                                  | C_unihb_00040_mRNA_11.1       | -                              |
| GF0034136 | 0                             | 1                          | 0                           | 0 Hypothetical protein (1)                                  |                                                                                                                                                                                                                                                                                                                                                                                                                                                                                                                                                                                                                                                                                                                                                       |                                                                                                                                                                                                                                                                                                                                                                                                                                                                                                                                                                                                       |                                  | C_unihb_00039_mRNA_62.1       | -                              |
| GF0034135 | 0                             | 1                          | 0                           | 0 Sugar transport protein 14 (1)                            | membrane [GO:0016020 cellular_component] (1); transmembrane transporter activity [GO:0022857 molecular_function] (1); substrate-specific transmembrane transporter activity [GO:0022891 molecular_function] (1); integral component of membrane [GO:0016021 cellular_component] (1); transmembrane transport [GO:0055085 biological_process] (1)                                                                                                                                                                                                                                                                                                                                                                                                      | Major facilitator, sugar transporter-like [IPR005820] (1); Sugar/inositol transporter [IPR003663] (1); Major facilitator superfamily domain [IPR00846] (1)                                                                                                                                                                                                                                                                                                                                                                                                                                            |                                  | C_unihb_00039_mRNA_42.1       | -                              |
| GF0034134 | 0                             | 1                          | 0                           | 0 Protein FAR1-RELATED SEQUENCE 5 (1)                       | regulation of transcription, DNA-templated [GO:0006355 biological_process] (1)                                                                                                                                                                                                                                                                                                                                                                                                                                                                                                                                                                                                                                                                        | FHY3/FAR1 family [IPR01052] (1); FAR1 DNA binding domain [IPR004430] (1)                                                                                                                                                                                                                                                                                                                                                                                                                                                                                                                              |                                  | C_unihb_00039_mRNA_33.1       | -                              |
| GF0034133 | 0                             | 1                          | 0                           | 0 Hypothetical protein (1)                                  |                                                                                                                                                                                                                                                                                                                                                                                                                                                                                                                                                                                                                                                                                                                                                       | Bifunctional inhibitor/plant lipid transfer protein/seed storage helical domain [IPR01640] (1)                                                                                                                                                                                                                                                                                                                                                                                                                                                                                                        |                                  | C_unihb_00039_mRNA_21.1       | -                              |
| GF0034132 | 0                             | 1                          | 0                           | 0 Hypothetical protein (1)                                  |                                                                                                                                                                                                                                                                                                                                                                                                                                                                                                                                                                                                                                                                                                                                                       |                                                                                                                                                                                                                                                                                                                                                                                                                                                                                                                                                                                                       |                                  | C_unihb_00038_mRNA_99.1       | -                              |
| GF0034131 | 0                             | 1                          | 0                           | 0 Hypothetical protein (1)                                  |                                                                                                                                                                                                                                                                                                                                                                                                                                                                                                                                                                                                                                                                                                                                                       |                                                                                                                                                                                                                                                                                                                                                                                                                                                                                                                                                                                                       |                                  | C_unihb_00038_mRNA_91.1       | -                              |
| GF0034130 | 0                             | 1                          | 0                           | 0 Hypothetical protein (1)                                  |                                                                                                                                                                                                                                                                                                                                                                                                                                                                                                                                                                                                                                                                                                                                                       |                                                                                                                                                                                                                                                                                                                                                                                                                                                                                                                                                                                                       |                                  | C_unihb_00038_mRNA_71.1       | -                              |
| GF0034129 | 0                             | 1                          | 0                           | 0 Hypothetical protein (1)                                  | thiamin pyrophosphate binding [GO:0007076 molecular_function] (1); magnesium ion binding [GO:0000287 molecular_function] (1)                                                                                                                                                                                                                                                                                                                                                                                                                                                                                                                                                                                                                          | Thiamin diphosphate-binding fold [IPR029061] (1); DHR-like NAD/FAD-binding domain [IPR020803] (1); Thiamine pyrophosphate enzyme, central domain [IPR012000] (1)                                                                                                                                                                                                                                                                                                                                                                                                                                      |                                  | C_unihb_00038_mRNA_69.1       | -                              |
| GF0034128 | 0                             | 1                          | 0                           | 0 Hypothetical protein (1)                                  | magnesium ion binding [GO:0000287 molecular_function] (1); terpene synthase activity [GO:0010103 molecular_function] (1); lyase activity [GO:0016829 molecular_function] (1)                                                                                                                                                                                                                                                                                                                                                                                                                                                                                                                                                                          | Terpene synthase, metal-binding domain [IPR005630] (1); Isoprenoid synthase domain [IPR008949] (1)                                                                                                                                                                                                                                                                                                                                                                                                                                                                                                    |                                  | C_unihb_00038_mRNA_63.1       | -                              |
| GF0034126 | 0                             | 1                          | 0                           | 0 Hypothetical protein (1)                                  | zinc ion binding [GO:0008270 molecular_function] (1); protein binding [GO:0005515 molecular_function] (1); protein ubiquitination [GO:0016567 biological_process] (1); nucleus [GO:0005624 cellular_component] (1); multicellular organismal development [GO:0007275 biological_process] (1); ubiquitin-dependent protein catabolic process [GO:0006511 biological_process] (1); ubiquitin-protein transferase activity [GO:0004842 molecular_function] (1)                                                                                                                                                                                                                                                                                           | SAM dependent carbonyl methyltransferase [IPR005299] (1)                                                                                                                                                                                                                                                                                                                                                                                                                                                                                                                                              |                                  | C_unihb_00038_mRNA_57.1       | -                              |
| GF0034125 | 0                             | 1                          | 0                           | 0 E3 ubiquitin-protein ligase (1)                           | protein binding [GO:0005515 molecular_function] (1); zinc ion binding [GO:0008270 molecular_function] (1); ubiquitin-protein transferase activity [GO:0004842 molecular_function] (1); ubiquitin-dependent protein catabolic process [GO:0006511 biological_process] (1); multicellular organismal development [GO:0007275 biological_process] (1); nucleus [GO:0005624 cellular_component] (1); protein ubiquitination [GO:0016567 biological_process] (1)                                                                                                                                                                                                                                                                                           | E3 ubiquitin-protein ligase SIN-like [IPR004612] (1); Zinc finger, SH3-like biological process [IPR013010] (1); TRAF-like [IPR008974] (1); SH3-type domain [IPR013323] (1); Seven-in-absentia protein, TRAF-like domain [IPR018121] (1); Zinc finger, RING-FYVE/PIRD-type [IPR013083] (1)                                                                                                                                                                                                                                                                                                             |                                  | C_unihb_00038_mRNA_41.1       | -                              |
| GF0034124 | 0                             | 1                          | 0                           | 0 E3 ubiquitin-protein ligase (1)                           | protein binding [GO:0005515 molecular_function] (1); zinc ion binding [GO:0008270 molecular_function] (1); ubiquitin-protein transferase activity [GO:0004842 molecular_function] (1); ubiquitin-dependent protein catabolic process [GO:0006511 biological_process] (1); multicellular organismal development [GO:0007275 biological_process] (1); nucleus [GO:0005624 cellular_component] (1); protein ubiquitination [GO:0016567 biological_process] (1)                                                                                                                                                                                                                                                                                           | SH3-type domain [IPR013323] (1); Zinc finger, RING-FYVE/PIRD-type [IPR013083] (1); Zinc finger, RING-type [IPR001041] (1); E3 ubiquitin-protein ligase SIN-like [IPR004612] (1); TRAF-like [IPR008974] (1)                                                                                                                                                                                                                                                                                                                                                                                            |                                  | C_unihb_00038_mRNA_40.1       | -                              |
| GF0034123 | 0                             | 1                          | 0                           | 0 Beta-galactosidase 44 (1)                                 | carbohydrate metabolic process [GO:0005775 biological_process] (1); hydrolase activity, hydrolyzing O-glycosyl compounds [GO:0004553 molecular_function] (1)                                                                                                                                                                                                                                                                                                                                                                                                                                                                                                                                                                                          | Glycoside hydrolase family 1 [IPR001360] (1); Glycoside hydrolase, catalytic domain [IPR013781] (1); Glycoside hydrolase superfamily [IPR017833] (1)                                                                                                                                                                                                                                                                                                                                                                                                                                                  |                                  | C_unihb_00038_mRNA_36.1       | -                              |
| GF0034122 | 0                             | 1                          | 0                           | 0 Hypothetical protein (1)                                  |                                                                                                                                                                                                                                                                                                                                                                                                                                                                                                                                                                                                                                                                                                                                                       |                                                                                                                                                                                                                                                                                                                                                                                                                                                                                                                                                                                                       |                                  | C_unihb_00038_mRNA_24.1       | -                              |
| GF0034121 | 0                             | 1                          | 0                           | 0 Hypothetical protein (1)                                  |                                                                                                                                                                                                                                                                                                                                                                                                                                                                                                                                                                                                                                                                                                                                                       |                                                                                                                                                                                                                                                                                                                                                                                                                                                                                                                                                                                                       |                                  | C_unihb_00038_mRNA_22.1       | -                              |
| GF0034120 | 0                             | 1                          | 0                           | 0 Hypothetical protein (1)                                  | ATP binding [GO:0005524 molecular_function] (1)                                                                                                                                                                                                                                                                                                                                                                                                                                                                                                                                                                                                                                                                                                       | ATPase, F1V1A1 complex, alpha/beta subunit, nucleotide-binding domain [IPR00194] (1); P-loop containing nucleoside triphosphate hydrolase [IPR023471] (1)                                                                                                                                                                                                                                                                                                                                                                                                                                             |                                  | C_unihb_00038_mRNA_113.1      | -                              |
| GF0034119 | 0                             | 1                          | 0                           | 0 ATP synthase subunit beta, chloroplast (1)                | hydrolase activity, acting on acid anhydrides, catalyzing transmembrane movement of substance [GO:0016820 molecular_function] (1); ATP synthesis coupled proton transport [GO:0015986 biological_process] (1); proton transporting two-sector ATPase complex, catalytic domain [GO:0033178 biological_process] (1); ATP hydrolysis coupled proton transport [GO:0015991 biological_process] (1); proton transporting ATP synthase complex, catalytic core F1 [GO:0045261 cellular_component] (1); proton-transporting ATP synthase activity, rotational mechanism [GO:0006933 molecular_function] (1); ATP binding [GO:0005524 molecular_function] (1); proton-transporting ATPase activity, rotational mechanism [GO:0046063 molecular_function] (1) | ATPase, F1 complex beta subunit/V1 complex, C-terminal [IPR024034] (1); ATPase, alpha/beta subunit, nucleotide-binding domain, active site [IPR020003] (1); ATPase, F1V1A1 complex, alpha/beta subunit, C-terminal [IPR007933] (1); ATP synthase delta/epsilon subunit, C-terminal domain [IPR025471] (1); P-loop containing nucleoside triphosphate hydrolase [IPR023471] (1); ATPase, F1 complex, delta/epsilon subunit, N-terminal [IPR025460] (1); ATPase, F1 complex, delta/epsilon subunit [IPR01469] (1); ATPase, F1V1A1 complex, alpha/beta subunit, nucleotide-binding domain [IPR00194] (1) |                                  | C_unihb_00038_mRNA_112.1      | -                              |
| GF0034118 | 0                             | 1                          | 0                           | 0 NAD(P)H-quinone oxidoreductase subunit K, chloroplast (1) | iron-sulfur cluster binding [GO:0051536 molecular_function] (1); 4 iron, 4 sulfur cluster binding [GO:0051539 molecular_function] (1); oxidation-reduction process [GO:0055114 biological_process] (1); quinone binding [GO:0004039 molecular_function] (1); NADH dehydrogenase (ubiquinone) activity [GO:0008137 molecular_function] (1)                                                                                                                                                                                                                                                                                                                                                                                                             | NADH:ubiquinone oxidoreductase-like, 20kDa subunit [IPR006137] (1); NADH:ubiquinone oxidoreductase, 20 kD subunit [IPR006138] (1)                                                                                                                                                                                                                                                                                                                                                                                                                                                                     |                                  | C_unihb_00038_mRNA_111.1      | -                              |
| GF0034117 | 0                             | 1                          | 0                           | 0 Hypothetical protein (1)                                  | NADH dehydrogenase (ubiquinone) activity [GO:0008137 molecular_function] (1); quinone binding [GO:0004039 molecular_function] (1); oxidation-reduction process [GO:0055114 biological_process] (1); non-sulfur cluster binding [GO:0051536 molecular_function] (1); oxidation-reduction activity, acting on NAD(P)H [GO:0016851 molecular_function] (1); 4 iron, 4 sulfur cluster binding [GO:0051539 molecular_function] (1)                                                                                                                                                                                                                                                                                                                         | NADH:ubiquinone oxidoreductase-like, 20kDa subunit [IPR006137] (1); NADH:ubiquinone oxidoreductase, 20kDa subunit, conserved site [IPR006138] (1); NADH dehydrogenase, subunit C [IPR010218] (1); NADH:ubiquinone oxidoreductase, 20kDa subunit [IPR006138] (1); NADH:ubiquinone oxidoreductase, 20 kD subunit [IPR006138] (1)                                                                                                                                                                                                                                                                        |                                  | C_unihb_00038_mRNA_110.1      | -                              |

| ID        | Num. in <i>C. crottensteini</i> | Num. in <i>C. caudata</i> | Num. in <i>P. trifidata</i> | Note                                                                 | GO                                                                                                                                                                                                                                                                                                                                                                                                                            | InterPro                                                                                                                                                                                                                                                                                                                      | Members in <i>Crottensteini</i> | Members in <i>Caudata</i> | Members in <i>Trifidata</i> |
|-----------|---------------------------------|---------------------------|-----------------------------|----------------------------------------------------------------------|-------------------------------------------------------------------------------------------------------------------------------------------------------------------------------------------------------------------------------------------------------------------------------------------------------------------------------------------------------------------------------------------------------------------------------|-------------------------------------------------------------------------------------------------------------------------------------------------------------------------------------------------------------------------------------------------------------------------------------------------------------------------------|---------------------------------|---------------------------|-----------------------------|
| GF003416  | 0                               | 1                         | 0                           | Hypothetical protein (1)                                             | photosynthesis [GO:0015979 biological_process] (1); integral component of membrane [GO:0016021 cellular_component] (1); photosystem I [GO:0009522 cellular_component] (1); carbon fixation [GO:0009577 biological_process] (1); electron carrier activity [GO:0009055 molecular_function] (1); heme binding [GO:0020037 molecular_function] (1); integral component of thylakoid membrane [GO:0005979 cellular_component] (1) | Ribulose biphosphate carboxylase, large subunit, ferredoxin-like N-terminal [IPRO17443] (1); Photosystem I YcF8 assembly [IPRO03359] (1)                                                                                                                                                                                      | -                               | C_ushii_00038_mRNA_108.1  | -                           |
| GF003415  | 0                               | 1                         | 0                           | Cytochrome f (1)                                                     | photosynthesis [GO:0015979 biological_process] (1); electron carrier activity [GO:0009055 molecular_function] (1); heme binding [GO:0020037 molecular_function] (1); integral component of thylakoid membrane [GO:0005979 cellular_component] (1)                                                                                                                                                                             | Cytochrome f [IPRO02325] (1); Cytochrome f large domain [IPRO24094] (1)                                                                                                                                                                                                                                                       | -                               | C_ushii_00038_mRNA_107.1  | -                           |
| GF003414  | 0                               | 1                         | 0                           | Hypothetical protein (1)                                             | photosystem I [GO:0009522 cellular_component] (1); carbon fixation [GO:0009577 biological_process] (1); ribulose biphosphate carboxylase activity [GO:001084 molecular_function] (1); thylakoid [GO:0005979 cellular_component] (1); photosynthesis [GO:0015979 biological_process] (1); integral component of membrane [GO:0016021 cellular_component] (1)                                                                   | Photosystem I YcF8 assembly [IPRO03359] (1); Ribulose biphosphate carboxylase, large subunit, ferredoxin-like N-terminal [IPRO17443] (1)                                                                                                                                                                                      | -                               | C_ushii_00038_mRNA_106.1  | -                           |
| GF003413  | 0                               | 1                         | 0                           | DNA-directed RNA polymerase, alpha subunit (1)                       | transcription, DNA-templated [GO:0006351 biological_process] (1); DNA-directed RNA polymerase activity [GO:0003899 molecular_function] (1); protein dimerization activity [GO:0046983 molecular_function] (1); DNA binding [GO:0003677 molecular_function] (1)                                                                                                                                                                | DNA-directed RNA polymerase, alpha subunit [IPRO11773] (1); RNA polymerase, alpha subunit, C-terminal [IPRO11260] (1); DNA-directed RNA polymerase, RPO11-like dimerization domain [IPRO09025] (1); DNA-directed RNA polymerase, insert domain [IPRO11262] (1); DNA-directed RNA polymerase, RpoA/D/Rpb3-type [IPRO11263] (1) | -                               | C_ushii_00038_mRNA_104.1  | -                           |
| GF003412  | 0                               | 1                         | 0                           | 30S ribosomal protein S11, chloroplast (1)                           | ribosome [GO:0005840 cellular_component] (1); structural constituent of ribosome [GO:0003735 molecular_function] (1); structural constituent of ribosome [GO:0005840 cellular_component] (1); translation [GO:0006412 biological_process] (1)                                                                                                                                                                                 | Ribosomal protein S11, bacterial-type [IPRO19981] (1); Ribosomal S11, conserved [IPRO1102] (1); Ribosomal protein S11 [IPRO1971] (1)                                                                                                                                                                                          | -                               | C_ushii_00038_mRNA_103.1  | -                           |
| GF003411  | 0                               | 1                         | 0                           | Hypothetical protein (1)                                             | ribosome [GO:0005840 cellular_component] (1); translation [GO:0006412 biological_process] (1); large ribosomal subunit [GO:0015934 cellular_component] (1); structural constituent of ribosome [GO:0003735 molecular_function] (1)                                                                                                                                                                                            | Ribosomal protein L22, bacterial/cholesterol-type [IPRO05727] (1); Ribosomal protein L22.L17 [IPRO01063] (1)                                                                                                                                                                                                                  | -                               | C_ushii_00038_mRNA_100.1  | -                           |
| GF003410  | 0                               | 1                         | 0                           | 50S ribosomal protein L22, chloroplast (1)                           | ribosome [GO:0005840 cellular_component] (1); translation [GO:0006412 biological_process] (1); large ribosomal subunit [GO:0015934 cellular_component] (1); structural constituent of ribosome [GO:0003735 molecular_function] (1)                                                                                                                                                                                            | Ribosomal protein L22, bacterial/cholesterol-type [IPRO05727] (1); Ribosomal protein L22.L17 [IPRO01063] (1)                                                                                                                                                                                                                  | -                               | C_ushii_00038_mRNA_100.1  | -                           |
| GF003409  | 0                               | 1                         | 0                           | Hypothetical protein (1)                                             |                                                                                                                                                                                                                                                                                                                                                                                                                               |                                                                                                                                                                                                                                                                                                                               | -                               | C_ushii_00037_mRNA_95.1   | -                           |
| GF003408  | 0                               | 1                         | 0                           | Hypothetical protein (1)                                             |                                                                                                                                                                                                                                                                                                                                                                                                                               |                                                                                                                                                                                                                                                                                                                               | -                               | C_ushii_00037_mRNA_94.1   | -                           |
| GF003407  | 0                               | 1                         | 0                           | Hypothetical protein (1)                                             | binding [GO:0005488 molecular_function] (1)                                                                                                                                                                                                                                                                                                                                                                                   | Armadillo-like helical [IPRO11989] (1); Armadillo-type fold [IPRO16024] (1)                                                                                                                                                                                                                                                   | -                               | C_ushii_00037_mRNA_90.1   | -                           |
| GF003406  | 0                               | 1                         | 0                           | Hypothetical protein (1)                                             |                                                                                                                                                                                                                                                                                                                                                                                                                               |                                                                                                                                                                                                                                                                                                                               | -                               | C_ushii_00037_mRNA_87.1   | -                           |
| GF003405  | 0                               | 1                         | 0                           | Hypothetical protein (1)                                             |                                                                                                                                                                                                                                                                                                                                                                                                                               |                                                                                                                                                                                                                                                                                                                               | -                               | C_ushii_00037_mRNA_83.1   | -                           |
| GF003404  | 0                               | 1                         | 0                           | Hypothetical protein (1)                                             |                                                                                                                                                                                                                                                                                                                                                                                                                               |                                                                                                                                                                                                                                                                                                                               | -                               | C_ushii_00037_mRNA_77.1   | -                           |
| GF003403  | 0                               | 1                         | 0                           | Hypothetical protein (1)                                             |                                                                                                                                                                                                                                                                                                                                                                                                                               |                                                                                                                                                                                                                                                                                                                               | -                               | C_ushii_00037_mRNA_70.1   | -                           |
| GF003402  | 0                               | 1                         | 0                           | Hypothetical protein (1)                                             |                                                                                                                                                                                                                                                                                                                                                                                                                               |                                                                                                                                                                                                                                                                                                                               | -                               | C_ushii_00037_mRNA_54.1   | -                           |
| GF003401  | 0                               | 1                         | 0                           | Protein argonate PNH1 (1)                                            | protein binding [GO:0005515 molecular_function] (1); nucleic acid binding [GO:0003676 molecular_function] (1)                                                                                                                                                                                                                                                                                                                 | Ribonuclease H-like domain [IPRO12337] (1); Argonate, linker 1 domain [IPRO14811] (1); Argonate linker 2 domain [IPRO02572] (1); PAZ domain [IPRO03100] (1); Pwis domain [IPRO03165] (1)                                                                                                                                      | -                               | C_ushii_00037_mRNA_19.1   | -                           |
| GF003400  | 0                               | 1                         | 0                           | Hypothetical protein (1)                                             | DNA binding [GO:0003677 molecular_function] (1); regulation of transcription, DNA-templated [GO:0006355 biological_process] (1)                                                                                                                                                                                                                                                                                               | NAC domain [IPRO03441] (1)                                                                                                                                                                                                                                                                                                    | -                               | C_ushii_00037_mRNA_1.1    | -                           |
| GF0034099 | 0                               | 1                         | 0                           | Hypothetical protein (1)                                             |                                                                                                                                                                                                                                                                                                                                                                                                                               |                                                                                                                                                                                                                                                                                                                               | -                               | C_ushii_00036_mRNA_85.1   | -                           |
| GF0034098 | 0                               | 1                         | 0                           | Hypothetical protein (1)                                             |                                                                                                                                                                                                                                                                                                                                                                                                                               |                                                                                                                                                                                                                                                                                                                               | -                               | C_ushii_00036_mRNA_80.1   | -                           |
| GF0034097 | 0                               | 1                         | 0                           | Hypothetical protein (1)                                             |                                                                                                                                                                                                                                                                                                                                                                                                                               |                                                                                                                                                                                                                                                                                                                               | -                               | C_ushii_00036_mRNA_76.1   | -                           |
| GF0034096 | 0                               | 1                         | 0                           | Hypothetical protein (1)                                             | GTP binding [GO:0005525 molecular_function] (1); small GTPase mediated signal transduction [GO:007264 biological_process] (1)                                                                                                                                                                                                                                                                                                 | Small GTPase superfamily [IPRO01806] (1); P-loop containing nucleoside triphosphate hydrolase [IPRO27417] (1)                                                                                                                                                                                                                 | -                               | C_ushii_00036_mRNA_74.1   | -                           |
| GF0034095 | 0                               | 1                         | 0                           | Hypothetical protein (1)                                             | GTP binding [GO:0005525 molecular_function] (1); small GTPase mediated signal transduction [GO:007264 biological_process] (1); protein transport [GO:0015031 biological_process] (1)                                                                                                                                                                                                                                          | P-loop containing nucleoside triphosphate hydrolase [IPRO27417] (1); Small GTPase superfamily [IPRO01806] (1); Small GTP-binding protein domain [IPRO05225] (1); Small GTPase superfamily, Rab-type [IPRO03579] (1)                                                                                                           | -                               | C_ushii_00036_mRNA_69.1   | -                           |
| GF0034094 | 0                               | 1                         | 0                           | Hypothetical protein (1)                                             |                                                                                                                                                                                                                                                                                                                                                                                                                               |                                                                                                                                                                                                                                                                                                                               | -                               | C_ushii_00036_mRNA_61.1   | -                           |
| GF0034093 | 0                               | 1                         | 0                           | Hypothetical protein (1)                                             |                                                                                                                                                                                                                                                                                                                                                                                                                               | Zinc finger, FYVE/PHD-type [IPRO11011] (1); Zinc finger, RING-FYVE/PHD-type [IPRO13083] (1)                                                                                                                                                                                                                                   | -                               | C_ushii_00036_mRNA_59.1   | -                           |
| GF0034092 | 0                               | 1                         | 0                           | Hypothetical protein (1)                                             |                                                                                                                                                                                                                                                                                                                                                                                                                               |                                                                                                                                                                                                                                                                                                                               | -                               | C_ushii_00036_mRNA_57.1   | -                           |
| GF0034091 | 0                               | 1                         | 0                           | Hypothetical protein (1)                                             |                                                                                                                                                                                                                                                                                                                                                                                                                               |                                                                                                                                                                                                                                                                                                                               | -                               | C_ushii_00036_mRNA_56.1   | -                           |
| GF0034090 | 0                               | 1                         | 0                           | Hypothetical protein (1)                                             |                                                                                                                                                                                                                                                                                                                                                                                                                               |                                                                                                                                                                                                                                                                                                                               | -                               | C_ushii_00036_mRNA_49.1   | -                           |
| GF0034089 | 0                               | 1                         | 0                           | Disease resistance family protein / LRR family protein, putative (1) | protein binding [GO:0005515 molecular_function] (1)                                                                                                                                                                                                                                                                                                                                                                           | Leucine-rich repeat [IPRO01611] (1); Leucine-rich repeat-containing N-terminal, plant-type [IPRO12101] (1); Leucine-rich repeat domain, L domain-like [IPRO02675] (1)                                                                                                                                                         | -                               | C_ushii_00036_mRNA_48.1   | -                           |
| GF0034088 | 0                               | 1                         | 0                           | DNA-directed RNA polymerase, beta subunit (1)                        | transcription, DNA-templated [GO:0006351 biological_process] (1); DNA-directed RNA polymerase activity [GO:0003899 molecular_function] (1); ribonucleoside binding [GO:0003249 molecular_function] (1); DNA binding [GO:0003677 molecular_function] (1)                                                                                                                                                                       | DNA-directed RNA polymerase, subunit 2 [IPRO15712] (1); RNA polymerase Rpb2, domain 7 [IPRO07641] (1); DNA-directed RNA polymerase, subunit 2, domain 6 [IPRO07120] (1)                                                                                                                                                       | -                               | C_ushii_00036_mRNA_45.1   | -                           |
| GF0034087 | 0                               | 1                         | 0                           | DNA-directed RNA polymerase (1)                                      | transcription, DNA-templated [GO:0006351 biological_process] (1); DNA binding [GO:0003677 molecular_function] (1); DNA-directed RNA polymerase activity [GO:0003899 molecular_function] (1)                                                                                                                                                                                                                                   | RNA polymerase Rpb1, domain 3 [IPRO07066] (1); RNA polymerase, alpha subunit [IPRO00722] (1); RNA polymerase, N-terminal [IPRO06592] (1)                                                                                                                                                                                      | -                               | C_ushii_00036_mRNA_44.1   | -                           |
| GF0034086 | 0                               | 1                         | 0                           | DNA-directed RNA polymerase (1)                                      | DNA binding [GO:0003677 molecular_function] (1); ribonucleoside binding [GO:0003249 molecular_function] (1); DNA-directed RNA polymerase activity [GO:0003899 molecular_function] (1); transcription, DNA-templated [GO:0006351 biological_process] (1)                                                                                                                                                                       | RNA polymerase Rpb2, domain 7 [IPRO07641] (1); RNA polymerase Rpb2, OB-fold [IPRO14724] (1); DNA-directed RNA polymerase, subunit 2, domain 6 [IPRO07120] (1); DNA-directed RNA polymerase, subunit 2 [IPRO15712] (1); RNA polymerase, beta subunit, conserved site [IPRO07121] (1)                                           | -                               | C_ushii_00036_mRNA_42.1   | -                           |
| GF0034085 | 0                               | 1                         | 0                           | Hypothetical protein (1)                                             | DNA-directed RNA polymerase activity [GO:0003899 molecular_function] (1); DNA binding [GO:0003677 molecular_function] (1); transcription, DNA-templated [GO:0006351 biological_process] (1)                                                                                                                                                                                                                                   | RNA polymerase Rpb1, domain 5 [IPRO07081] (1)                                                                                                                                                                                                                                                                                 | -                               | C_ushii_00036_mRNA_41.1   | -                           |
| GF0034084 | 0                               | 1                         | 0                           | Hypothetical protein (1)                                             | DNA binding [GO:0003677 molecular_function] (1); DNA-directed RNA polymerase activity [GO:0003899 molecular_function] (1); transcription, DNA-templated [GO:0006351 biological_process] (1)                                                                                                                                                                                                                                   | RNA polymerase Rpb1, domain 1 [IPRO07080] (1); DNA-directed RNA polymerase, subunit beta' [IPRO12756] (1); RNA polymerase Rpb1, domain 5 [IPRO07081] (1); RNA polymerase Rpb1, domain 4 [IPRO07083] (1)                                                                                                                       | -                               | C_ushii_00036_mRNA_40.1   | -                           |
| GF0034083 | 0                               | 1                         | 0                           | Hypothetical protein (1)                                             | transcription, DNA-templated [GO:0006351 biological_process] (1); DNA-directed RNA polymerase activity [GO:0003899 molecular_function] (1); ribonucleoside binding [GO:0003249 molecular_function] (1); DNA binding [GO:0003677 molecular_function] (1)                                                                                                                                                                       | DNA-directed RNA polymerase, subunit 2 [IPRO15712] (1); RNA polymerase Rpb2, domain 7 [IPRO07641] (1)                                                                                                                                                                                                                         | -                               | C_ushii_00036_mRNA_39.1   | -                           |
| GF0034082 | 0                               | 1                         | 0                           | Epoxy hydrolase (1)                                                  | catalytic activity [GO:0003824 molecular_function] (1)                                                                                                                                                                                                                                                                                                                                                                        | Alpha/beta hydrolase fold-4 [IPRO00073] (1); Alpha/Beta hydrolase fold [IPRO20050] (1); Epoxy hydrolase-like [IPRO06039] (1)                                                                                                                                                                                                  | -                               | C_ushii_00036_mRNA_38.1   | -                           |
| GF0034081 | 0                               | 1                         | 0                           | Hypothetical protein (1)                                             | metabolic process [GO:0008152 biological_process] (1); catalytic activity [GO:0003824 molecular_function] (1)                                                                                                                                                                                                                                                                                                                 | Fumarylacetoacetate, C-terminal-related [IPRO11254] (1)                                                                                                                                                                                                                                                                       | -                               | C_ushii_00036_mRNA_37.1   | -                           |
| GF0034080 | 0                               | 1                         | 0                           | Ribosomal L22e family protein (1)                                    | intracellular [GO:0009562 cellular_component] (1); translation [GO:0006412 biological_process] (1); structural constituent of ribosome [GO:0003735 molecular_function] (1); ribosome [GO:0005840 cellular_component] (1)                                                                                                                                                                                                      | Ribosomal protein L22e [IPRO02671] (1)                                                                                                                                                                                                                                                                                        | -                               | C_ushii_00036_mRNA_22.1   | -                           |
| GF0034079 | 0                               | 1                         | 0                           | Hypothetical protein (1)                                             |                                                                                                                                                                                                                                                                                                                                                                                                                               |                                                                                                                                                                                                                                                                                                                               | -                               | C_ushii_00036_mRNA_21.1   | -                           |
| GF0034078 | 0                               | 1                         | 0                           | Hypothetical protein (1)                                             |                                                                                                                                                                                                                                                                                                                                                                                                                               |                                                                                                                                                                                                                                                                                                                               | -                               | C_ushii_00036_mRNA_2.1    | -                           |
| GF0034077 | 0                               | 1                         | 0                           | Hypothetical protein (1)                                             | protein binding [GO:0005515 molecular_function] (1)                                                                                                                                                                                                                                                                                                                                                                           | F-box domain [IPRO01810] (1)                                                                                                                                                                                                                                                                                                  | -                               | C_ushii_00036_mRNA_10.1   | -                           |
| GF0034076 | 0                               | 1                         | 0                           | Hypothetical protein (1)                                             |                                                                                                                                                                                                                                                                                                                                                                                                                               |                                                                                                                                                                                                                                                                                                                               | -                               | C_ushii_00035_mRNA_99.1   | -                           |
| GF0034075 | 0                               | 1                         | 0                           | Hypothetical protein (1)                                             |                                                                                                                                                                                                                                                                                                                                                                                                                               |                                                                                                                                                                                                                                                                                                                               | -                               | C_ushii_00035_mRNA_97.1   | -                           |
| GF0034074 | 0                               | 1                         | 0                           | Hypothetical protein (1)                                             |                                                                                                                                                                                                                                                                                                                                                                                                                               |                                                                                                                                                                                                                                                                                                                               | -                               | C_ushii_00035_mRNA_85.1   | -                           |
| GF0034073 | 0                               | 1                         | 0                           | Hypothetical protein (1)                                             |                                                                                                                                                                                                                                                                                                                                                                                                                               |                                                                                                                                                                                                                                                                                                                               | -                               | C_ushii_00035_mRNA_83.1   | -                           |
| GF0034072 | 0                               | 1                         | 0                           | Hypothetical protein (1)                                             | ADP binding [GO:0043531 molecular_function] (1)                                                                                                                                                                                                                                                                                                                                                                               | P-loop containing nucleoside triphosphate hydrolase [IPRO27417] (1); NB-ARC [IPRO02182] (1); Leucine-rich repeat domain, L domain-like [IPRO02675] (1)                                                                                                                                                                        | -                               | C_ushii_00035_mRNA_81.1   | -                           |
| GF0034071 | 0                               | 1                         | 0                           | Hypothetical protein (1)                                             |                                                                                                                                                                                                                                                                                                                                                                                                                               |                                                                                                                                                                                                                                                                                                                               | -                               | C_ushii_00035_mRNA_74.1   | -                           |
| GF0034070 | 0                               | 1                         | 0                           | Hypothetical protein (1)                                             | ADP binding [GO:0043531 molecular_function] (1)                                                                                                                                                                                                                                                                                                                                                                               | P-loop containing nucleoside triphosphate hydrolase [IPRO27417] (1); NB-ARC [IPRO02182] (1)                                                                                                                                                                                                                                   | -                               | C_ushii_00035_mRNA_68.1   | -                           |

| ID        | Num. in <i>C. roseus</i> | Num. in <i>C. canis</i> | Num. in <i>P. putida</i> | Note                                                           | GO                                                                                                                                                                                                                                                                                                                                                                                | InterPro                                                                                                                                                                                                                                                                                                                    | Members in <i>C. roseus</i> | Members in <i>C. canis</i> | Members in <i>P. putida</i> |
|-----------|--------------------------|-------------------------|--------------------------|----------------------------------------------------------------|-----------------------------------------------------------------------------------------------------------------------------------------------------------------------------------------------------------------------------------------------------------------------------------------------------------------------------------------------------------------------------------|-----------------------------------------------------------------------------------------------------------------------------------------------------------------------------------------------------------------------------------------------------------------------------------------------------------------------------|-----------------------------|----------------------------|-----------------------------|
| GF0034069 | 0                        | 1                       | 1                        | 0 Hypothetical protein (1)                                     |                                                                                                                                                                                                                                                                                                                                                                                   | Leucine-rich repeat domain, L domain-like [IPR025751] (1)                                                                                                                                                                                                                                                                   | -                           | C_unihir_00035_mRNA_59.1   | -                           |
| GF0034068 | 0                        | 1                       | 1                        | 0 Hypothetical protein (1)                                     | ADP binding [GO:0043531 molecular_function] (1)                                                                                                                                                                                                                                                                                                                                   | P-loop containing nucleoside triphosphate hydrolase [IPR027417] (1); NB-ARC [IPR002182] (1)                                                                                                                                                                                                                                 | -                           | C_unihir_00035_mRNA_55.1   | -                           |
| GF0034067 | 0                        | 1                       | 1                        | 0 Hypothetical protein (1)                                     |                                                                                                                                                                                                                                                                                                                                                                                   |                                                                                                                                                                                                                                                                                                                             | -                           | C_unihir_00035_mRNA_53.1   | -                           |
| GF0034066 | 0                        | 1                       | 1                        | 0 Hypothetical protein (1)                                     |                                                                                                                                                                                                                                                                                                                                                                                   |                                                                                                                                                                                                                                                                                                                             | -                           | C_unihir_00035_mRNA_2.1    | -                           |
| GF0034065 | 0                        | 1                       | 1                        | 0 Hypothetical protein (1)                                     |                                                                                                                                                                                                                                                                                                                                                                                   |                                                                                                                                                                                                                                                                                                                             | -                           | C_unihir_00035_mRNA_101.1  | -                           |
| GF0034064 | 0                        | 1                       | 1                        | 0 Hypothetical protein (1)                                     |                                                                                                                                                                                                                                                                                                                                                                                   |                                                                                                                                                                                                                                                                                                                             | -                           | C_unihir_00035_mRNA_100.1  | -                           |
| GF0034063 | 0                        | 1                       | 1                        | 0 Hypothetical protein (1)                                     |                                                                                                                                                                                                                                                                                                                                                                                   |                                                                                                                                                                                                                                                                                                                             | -                           | C_unihir_00034_mRNA_68.1   | -                           |
| GF0034062 | 0                        | 1                       | 1                        | 0 Lacase (1)                                                   | hydroquinone oxygen oxidoreductase activity [GO:0052716 molecular_function] (1); sphalast [GO:0048046 cellular_component] (1); copper ion binding [GO:0050507 molecular_function] (1); oxidoreductase activity [GO:0016491 molecular_function] (1); oxidation-reduction process [GO:0055114 biological_process] (1); lignin catabolic process [GO:0040274 biological_process] (1) | Multicopper oxidase, type 2 [IPR011707] (1); Cuproresin [IPR009721] (1); Multicopper oxidase, type 1 [IPR011117] (1); Lacase [IPR017761] (1)                                                                                                                                                                                | -                           | C_unihir_00034_mRNA_61.1   | -                           |
| GF0034061 | 0                        | 1                       | 1                        | 0 Hypothetical protein (1)                                     |                                                                                                                                                                                                                                                                                                                                                                                   |                                                                                                                                                                                                                                                                                                                             | -                           | C_unihir_00034_mRNA_31.1   | -                           |
| GF0034060 | 0                        | 1                       | 1                        | 0 Hypothetical protein (1)                                     |                                                                                                                                                                                                                                                                                                                                                                                   |                                                                                                                                                                                                                                                                                                                             | -                           | C_unihir_00034_mRNA_29.1   | -                           |
| GF0034059 | 0                        | 1                       | 1                        | 0 Hypothetical protein (1)                                     |                                                                                                                                                                                                                                                                                                                                                                                   |                                                                                                                                                                                                                                                                                                                             | -                           | C_unihir_00034_mRNA_27.1   | -                           |
| GF0034058 | 0                        | 1                       | 1                        | 0 Hypothetical protein (1)                                     |                                                                                                                                                                                                                                                                                                                                                                                   | Protein kinase-like domain [IPR011009] (1)                                                                                                                                                                                                                                                                                  | -                           | C_unihir_00034_mRNA_24.1   | -                           |
| GF0034057 | 0                        | 1                       | 1                        | 0 Hypothetical protein (1)                                     | protein binding [GO:0005515 molecular_function] (1)                                                                                                                                                                                                                                                                                                                               | Leucine-rich repeat domain, L domain-like [IPR025751] (1); Leucine-rich repeat [IPR016111] (1); WD40/VVTN repeat-like-containing domain [IPR015942] (1); WD40 repeat [IPR016801] (1); WD40-repeat-containing domain [IPR017986] (1)                                                                                         | -                           | C_unihir_00034_mRNA_23.1   | -                           |
| GF0034056 | 0                        | 1                       | 1                        | 0 Hypothetical protein (1)                                     |                                                                                                                                                                                                                                                                                                                                                                                   |                                                                                                                                                                                                                                                                                                                             | -                           | C_unihir_00033_mRNA_8.1    | -                           |
| GF0034055 | 0                        | 1                       | 1                        | 0 Hypothetical protein (1)                                     |                                                                                                                                                                                                                                                                                                                                                                                   |                                                                                                                                                                                                                                                                                                                             | -                           | C_unihir_00033_mRNA_7.1    | -                           |
| GF0034054 | 0                        | 1                       | 1                        | 0 Hypothetical protein (1)                                     | protein kinase activity [GO:0004672 molecular_function] (1); protein phosphorylation [GO:0006468 biological_process] (1); ATP binding [GO:0005524 molecular_function] (1)                                                                                                                                                                                                         | Protein kinase, ATP binding site [IPR017411] (1); Serine/threonine dual specificity protein kinase, catalytic domain [IPR002290] (1); Protein kinase-like domain [IPR011009] (1); Protein kinase domain [IPR000719] (1)                                                                                                     | -                           | C_unihir_00033_mRNA_59.1   | -                           |
| GF0034053 | 0                        | 1                       | 1                        | 0 Contains similarity to reverse transcriptase-related (1)     |                                                                                                                                                                                                                                                                                                                                                                                   |                                                                                                                                                                                                                                                                                                                             | -                           | C_unihir_00033_mRNA_58.1   | -                           |
| GF0034052 | 0                        | 1                       | 1                        | 0 Hypothetical protein (1)                                     |                                                                                                                                                                                                                                                                                                                                                                                   |                                                                                                                                                                                                                                                                                                                             | -                           | C_unihir_00033_mRNA_57.1   | -                           |
| GF0034051 | 0                        | 1                       | 1                        | 0 Hypothetical protein (1)                                     |                                                                                                                                                                                                                                                                                                                                                                                   |                                                                                                                                                                                                                                                                                                                             | -                           | C_unihir_00033_mRNA_51.1   | -                           |
| GF0034050 | 0                        | 1                       | 1                        | 0 Non-TR retroelement reverse transcriptase-like (1)           | RNA-DNA hybrid ribonuclease activity [GO:0004532 molecular_function] (1); nucleic acid binding [GO:0003676 molecular_function] (1)                                                                                                                                                                                                                                                | Ribonuclease H domain [IPR002156] (1); Ribonuclease H-like domain [IPR012337] (1)                                                                                                                                                                                                                                           | -                           | C_unihir_00033_mRNA_50.1   | -                           |
| GF0034049 | 0                        | 1                       | 1                        | 0 Hypothetical protein (1)                                     |                                                                                                                                                                                                                                                                                                                                                                                   |                                                                                                                                                                                                                                                                                                                             | -                           | C_unihir_00033_mRNA_35.1   | -                           |
| GF0034048 | 0                        | 1                       | 1                        | 0 Hypothetical protein (1)                                     |                                                                                                                                                                                                                                                                                                                                                                                   | Endonuclease/exonuclease/phosphatase [IPR005135] (4)                                                                                                                                                                                                                                                                        | -                           | C_unihir_00033_mRNA_31.1   | -                           |
| GF0034047 | 0                        | 1                       | 1                        | 0 Hypothetical protein (1)                                     |                                                                                                                                                                                                                                                                                                                                                                                   |                                                                                                                                                                                                                                                                                                                             | -                           | C_unihir_00033_mRNA_28.1   | -                           |
| GF0034046 | 0                        | 1                       | 1                        | 0 Hypothetical protein (1)                                     |                                                                                                                                                                                                                                                                                                                                                                                   |                                                                                                                                                                                                                                                                                                                             | -                           | C_unihir_00033_mRNA_26.1   | -                           |
| GF0034045 | 0                        | 1                       | 1                        | 0 Hypothetical protein (1)                                     |                                                                                                                                                                                                                                                                                                                                                                                   | Leucine-rich repeat domain, L domain-like [IPR026751] (1)                                                                                                                                                                                                                                                                   | -                           | C_unihir_00033_mRNA_24.1   | -                           |
| GF0034044 | 0                        | 1                       | 1                        | 0 Hypothetical protein (1)                                     |                                                                                                                                                                                                                                                                                                                                                                                   |                                                                                                                                                                                                                                                                                                                             | -                           | C_unihir_00033_mRNA_23.1   | -                           |
| GF0034043 | 0                        | 1                       | 1                        | 0 Hypothetical protein (1)                                     |                                                                                                                                                                                                                                                                                                                                                                                   |                                                                                                                                                                                                                                                                                                                             | -                           | C_unihir_00033_mRNA_21.1   | -                           |
| GF0034042 | 0                        | 1                       | 1                        | 0 Hypothetical protein (1)                                     |                                                                                                                                                                                                                                                                                                                                                                                   |                                                                                                                                                                                                                                                                                                                             | -                           | C_unihir_00033_mRNA_20.1   | -                           |
| GF0034041 | 0                        | 1                       | 1                        | 0 Hypothetical protein (1)                                     |                                                                                                                                                                                                                                                                                                                                                                                   | Aspartic peptidase domain [IPR021109] (1)                                                                                                                                                                                                                                                                                   | -                           | C_unihir_00033_mRNA_16.1   | -                           |
| GF0034040 | 0                        | 1                       | 1                        | 0 Hypothetical protein (1)                                     |                                                                                                                                                                                                                                                                                                                                                                                   |                                                                                                                                                                                                                                                                                                                             | -                           | C_unihir_00033_mRNA_11.1   | -                           |
| GF0034039 | 0                        | 1                       | 1                        | 0 Hypothetical protein (1)                                     |                                                                                                                                                                                                                                                                                                                                                                                   |                                                                                                                                                                                                                                                                                                                             | -                           | C_unihir_00033_mRNA_10.1   | -                           |
| GF0034038 | 0                        | 1                       | 1                        | 0 Hypothetical protein (1)                                     |                                                                                                                                                                                                                                                                                                                                                                                   |                                                                                                                                                                                                                                                                                                                             | -                           | C_unihir_00033_mRNA_1.1    | -                           |
| GF0034037 | 0                        | 1                       | 1                        | 0 Hypothetical protein (1)                                     |                                                                                                                                                                                                                                                                                                                                                                                   |                                                                                                                                                                                                                                                                                                                             | -                           | C_unihir_00032_mRNA_78.1   | -                           |
| GF0034036 | 0                        | 1                       | 1                        | 0 Hypothetical protein (1)                                     |                                                                                                                                                                                                                                                                                                                                                                                   |                                                                                                                                                                                                                                                                                                                             | -                           | C_unihir_00032_mRNA_74.1   | -                           |
| GF0034035 | 0                        | 1                       | 1                        | 0 Hypothetical protein (1)                                     |                                                                                                                                                                                                                                                                                                                                                                                   |                                                                                                                                                                                                                                                                                                                             | -                           | C_unihir_00032_mRNA_59.1   | -                           |
| GF0034034 | 0                        | 1                       | 1                        | 0 Hypothetical protein (1)                                     | DNA binding [GO:0003677 molecular_function] (1)                                                                                                                                                                                                                                                                                                                                   | Homeo-domain-like [IPR009057] (1)                                                                                                                                                                                                                                                                                           | -                           | C_unihir_00032_mRNA_46.1   | -                           |
| GF0034033 | 0                        | 1                       | 1                        | 0 Hypothetical protein (1)                                     |                                                                                                                                                                                                                                                                                                                                                                                   |                                                                                                                                                                                                                                                                                                                             | -                           | C_unihir_00032_mRNA_16.1   | -                           |
| GF0034032 | 0                        | 1                       | 1                        | 0 Putative WRKY transcription factor 49 (1)                    | regulation of transcription, DNA-templated [GO:0006355 biological_process] (1); sequence-specific DNA binding [GO:0043565 molecular_function] (1); transcription factor activity, sequence-specific DNA binding [GO:0003700 molecular_function] (1)                                                                                                                               | WRKY domain [IPR003657] (1)                                                                                                                                                                                                                                                                                                 | -                           | C_unihir_00032_mRNA_15.1   | -                           |
| GF0034031 | 0                        | 1                       | 1                        | 0 Hypothetical protein (1)                                     |                                                                                                                                                                                                                                                                                                                                                                                   |                                                                                                                                                                                                                                                                                                                             | -                           | C_unihir_00031_mRNA_60.1   | -                           |
| GF0034030 | 0                        | 1                       | 1                        | 0 Hypothetical protein (1)                                     |                                                                                                                                                                                                                                                                                                                                                                                   |                                                                                                                                                                                                                                                                                                                             | -                           | C_unihir_00031_mRNA_58.1   | -                           |
| GF0034029 | 0                        | 1                       | 1                        | 0 Hypothetical protein (1)                                     |                                                                                                                                                                                                                                                                                                                                                                                   | Retroposon gag domain [IPR005162] (4)                                                                                                                                                                                                                                                                                       | -                           | C_unihir_00031_mRNA_54.1   | -                           |
| GF0034028 | 0                        | 1                       | 1                        | 0 Hypothetical protein (1)                                     | nucleic acid binding [GO:0003676 molecular_function] (1); zinc ion binding [GO:0008270 molecular_function] (1)                                                                                                                                                                                                                                                                    | Zinc finger, CCHC-type [IPR001878] (1)                                                                                                                                                                                                                                                                                      | -                           | C_unihir_00031_mRNA_41.1   | -                           |
| GF0034027 | 0                        | 1                       | 1                        | 0 Hypothetical protein (1)                                     |                                                                                                                                                                                                                                                                                                                                                                                   |                                                                                                                                                                                                                                                                                                                             | -                           | C_unihir_00031_mRNA_40.1   | -                           |
| GF0034026 | 0                        | 1                       | 1                        | 0 Hypothetical protein (1)                                     |                                                                                                                                                                                                                                                                                                                                                                                   |                                                                                                                                                                                                                                                                                                                             | -                           | C_unihir_00031_mRNA_38.1   | -                           |
| GF0034025 | 0                        | 1                       | 1                        | 0 Leucine-rich repeat (LRR) family protein (1)                 | protein binding [GO:0005515 molecular_function] (1)                                                                                                                                                                                                                                                                                                                               | Leucine-rich repeat, typical subtype [IPR003591] (1); Leucine-rich repeat domain, L domain-like [IPR025751] (1); Leucine-rich repeat [IPR016111] (1); Leucine-rich repeat-containing N-terminal, plant-type [IPR013210] (1)                                                                                                 | -                           | C_unihir_00031_mRNA_3.1    | -                           |
| GF0034024 | 0                        | 1                       | 1                        | 0 Hypothetical protein (1)                                     |                                                                                                                                                                                                                                                                                                                                                                                   |                                                                                                                                                                                                                                                                                                                             | -                           | C_unihir_00031_mRNA_24.1   | -                           |
| GF0034023 | 0                        | 1                       | 1                        | 0 Hypothetical protein (1)                                     | regulation of transcription, DNA-templated [GO:0006355 biological_process] (1)                                                                                                                                                                                                                                                                                                    | FAR1 DNA binding domain [IPR044330] (1); FHY3/FAR1 family [IPR031052] (1)                                                                                                                                                                                                                                                   | -                           | C_unihir_00031_mRNA_18.1   | -                           |
| GF0034022 | 0                        | 1                       | 1                        | 0 Hypothetical protein (1)                                     |                                                                                                                                                                                                                                                                                                                                                                                   |                                                                                                                                                                                                                                                                                                                             | -                           | C_unihir_00031_mRNA_16.1   | -                           |
| GF0034021 | 0                        | 1                       | 1                        | 0 Hypothetical protein (1)                                     |                                                                                                                                                                                                                                                                                                                                                                                   |                                                                                                                                                                                                                                                                                                                             | -                           | C_unihir_00031_mRNA_15.1   | -                           |
| GF0034020 | 0                        | 1                       | 1                        | 0 LRR receptor-like serine/threonine-protein kinase ERL1 (1)   | protein binding [GO:0005515 molecular_function] (1)                                                                                                                                                                                                                                                                                                                               | Leucine-rich repeat [IPR016111] (1); Leucine-rich repeat, typical subtype [IPR003591] (1); Leucine-rich repeat domain, L domain-like [IPR025751] (1); Leucine-rich repeat [IPR016111] (1); Leucine-rich repeat-containing N-terminal, plant-type [IPR013210] (1); Leucine-rich repeat domain, L domain-like [IPR025751] (1) | -                           | C_unihir_00031_mRNA_14.1   | -                           |
| GF0034019 | 0                        | 1                       | 1                        | 0 LRR amino-terminal domain protein (1)                        | protein binding [GO:0005515 molecular_function] (1)                                                                                                                                                                                                                                                                                                                               | Leucine-rich repeat domain, L domain-like [IPR025751] (1)                                                                                                                                                                                                                                                                   | -                           | C_unihir_00031_mRNA_13.1   | -                           |
| GF0034018 | 0                        | 1                       | 1                        | 0 Hypothetical protein (1)                                     |                                                                                                                                                                                                                                                                                                                                                                                   |                                                                                                                                                                                                                                                                                                                             | -                           | C_unihir_00031_mRNA_10.1   | -                           |
| GF0034017 | 0                        | 1                       | 1                        | 0 Hypothetical protein (1)                                     |                                                                                                                                                                                                                                                                                                                                                                                   |                                                                                                                                                                                                                                                                                                                             | -                           | C_unihir_00031_mRNA_1.1    | -                           |
| GF0034016 | 0                        | 1                       | 1                        | 0 Acid phosphatase 1 (1)                                       |                                                                                                                                                                                                                                                                                                                                                                                   | Sieve element occlusion, C-terminal [IPR027942] (1); Sieve element occlusion, N-terminal [IPR027942] (1)                                                                                                                                                                                                                    | -                           | C_unihir_00030_mRNA_66.1   | -                           |
| GF0034015 | 0                        | 1                       | 1                        | 0 Cp protein (1)                                               |                                                                                                                                                                                                                                                                                                                                                                                   | Protein of unknown function DUF538 [IPR014931] (1)                                                                                                                                                                                                                                                                          | -                           | C_unihir_00030_mRNA_63.1   | -                           |
| GF0034014 | 0                        | 1                       | 1                        | 0 Integrase (1)                                                |                                                                                                                                                                                                                                                                                                                                                                                   | Aspartic peptidase domain [IPR021109] (1)                                                                                                                                                                                                                                                                                   | -                           | C_unihir_00030_mRNA_59.1   | -                           |
| GF0034013 | 0                        | 1                       | 1                        | 0 Hypothetical protein (1)                                     |                                                                                                                                                                                                                                                                                                                                                                                   |                                                                                                                                                                                                                                                                                                                             | -                           | C_unihir_00030_mRNA_58.1   | -                           |
| GF0034012 | 0                        | 1                       | 1                        | 0 Hypothetical protein (1)                                     |                                                                                                                                                                                                                                                                                                                                                                                   |                                                                                                                                                                                                                                                                                                                             | -                           | C_unihir_00030_mRNA_57.1   | -                           |
| GF0034011 | 0                        | 1                       | 1                        | 0 Hypothetical protein (1)                                     |                                                                                                                                                                                                                                                                                                                                                                                   |                                                                                                                                                                                                                                                                                                                             | -                           | C_unihir_00030_mRNA_43.1   | -                           |
| GF0034010 | 0                        | 1                       | 1                        | 0 Hypothetical protein (1)                                     | zinc ion binding [GO:0008270 molecular_function] (1); nucleic acid binding [GO:0003676 molecular_function] (1)                                                                                                                                                                                                                                                                    | Zinc knuckle CXC4HX4C [IPR025836] (1); Zinc finger, CCHC-type [IPR001878] (1); Domain of unknown function DUF4283 [IPR025588] (1)                                                                                                                                                                                           | -                           | C_unihir_00030_mRNA_41.1   | -                           |
| GF0034009 | 0                        | 1                       | 1                        | 0 Hypothetical protein (1)                                     |                                                                                                                                                                                                                                                                                                                                                                                   | Reverse transcriptase zinc-binding domain [IPR026960] (4)                                                                                                                                                                                                                                                                   | -                           | C_unihir_00030_mRNA_16.1   | -                           |
| GF0034008 | 0                        | 1                       | 1                        | 0 Hypothetical protein (1)                                     |                                                                                                                                                                                                                                                                                                                                                                                   |                                                                                                                                                                                                                                                                                                                             | -                           | C_unihir_00030_mRNA_13.1   | -                           |
| GF0034007 | 0                        | 1                       | 1                        | 0 Hypothetical protein (1)                                     |                                                                                                                                                                                                                                                                                                                                                                                   |                                                                                                                                                                                                                                                                                                                             | -                           | C_unihir_00030_mRNA_12.1   | -                           |
| GF0034006 | 0                        | 1                       | 1                        | 0 Hypothetical protein (1)                                     |                                                                                                                                                                                                                                                                                                                                                                                   |                                                                                                                                                                                                                                                                                                                             | -                           | C_unihir_00030_mRNA_10.1   | -                           |
| GF0034005 | 0                        | 1                       | 1                        | 0 Hypothetical protein (1)                                     | regulation of transcription, DNA-templated [GO:0006355 biological_process] (1)                                                                                                                                                                                                                                                                                                    | FHY3/FAR1 family [IPR031052] (1); FAR1 DNA binding domain [IPR044330] (1)                                                                                                                                                                                                                                                   | -                           | C_unihir_00030_mRNA_1.1    | -                           |
| GF0034004 | 0                        | 1                       | 1                        | 0 Hypothetical protein (1)                                     |                                                                                                                                                                                                                                                                                                                                                                                   |                                                                                                                                                                                                                                                                                                                             | -                           | C_unihir_00029_mRNA_99.1   | -                           |
| GF0034003 | 0                        | 1                       | 1                        | 0 Hypothetical protein (1)                                     |                                                                                                                                                                                                                                                                                                                                                                                   |                                                                                                                                                                                                                                                                                                                             | -                           | C_unihir_00029_mRNA_98.1   | -                           |
| GF0034002 | 0                        | 1                       | 1                        | 0 Cytokinin riboside 5'-monophosphate phosphoribohydrolase (1) | enzyme activator activity [GO:0008047 molecular_function] (1); positive regulation of catalytic activity [GO:0043085 biological_process] (1); cytoskeleton-dependent decoupling of nuclear-transcribed mRNA [GO:0060290 biological_process] (1)                                                                                                                                   | LOG family [IPR031100] (1); Cytokinin riboside 5'-monophosphate phosphoribohydrolase LOG [IPR005269] (1)                                                                                                                                                                                                                    | -                           | C_unihir_00029_mRNA_95.1   | -                           |
| GF0034001 | 0                        | 1                       | 1                        | 0 Dcp1-like decoupling family protein, expressed (1)           |                                                                                                                                                                                                                                                                                                                                                                                   | mRNA-decapping enzyme subunit 1 [IPR010341] (1)                                                                                                                                                                                                                                                                             | -                           | C_unihir_00029_mRNA_94.1   | -                           |
| GF0034000 | 0                        | 1                       | 1                        | 0 Hypothetical protein (1)                                     |                                                                                                                                                                                                                                                                                                                                                                                   |                                                                                                                                                                                                                                                                                                                             | -                           | C_unihir_00029_mRNA_93.1   | -                           |
| GF0033999 | 0                        | 1                       | 1                        | 0 Hypothetical protein (1)                                     |                                                                                                                                                                                                                                                                                                                                                                                   | Reverse transcriptase domain [IPR004477] (4)                                                                                                                                                                                                                                                                                | -                           | C_unihir_00029_mRNA_92.1   | -                           |
| GF0033998 | 0                        | 1                       | 1                        | 0 Hypothetical protein (1)                                     |                                                                                                                                                                                                                                                                                                                                                                                   |                                                                                                                                                                                                                                                                                                                             | -                           | C_unihir_00029_mRNA_89.1   | -                           |
| GF0033997 | 0                        | 1                       | 1                        | 0 Hypothetical protein (1)                                     |                                                                                                                                                                                                                                                                                                                                                                                   | Reverse transcriptase zinc-binding domain [IPR026960] (4)                                                                                                                                                                                                                                                                   | -                           | C_unihir_00029_mRNA_88.1   | -                           |
| GF0033996 | 0                        | 1                       | 1                        | 0 Hypothetical protein (1)                                     | cysteine-type peptidase activity [GO:0006234 molecular_function] (1); proteolysis [GO:0006508 biological_process] (1)                                                                                                                                                                                                                                                             | Ulp1 protease family, C-terminal catalytic domain [IPR033653] (1)                                                                                                                                                                                                                                                           | -                           | C_unihir_00029_mRNA_75.1   | -                           |
| GF0033995 | 0                        | 1                       | 1                        | 0 Hypothetical protein (1)                                     |                                                                                                                                                                                                                                                                                                                                                                                   |                                                                                                                                                                                                                                                                                                                             | -                           | C_unihir_00029_mRNA_71.1   | -                           |
| GF0033994 | 0                        | 1                       | 1                        | 0 Cytokinin riboside 5'-monophosphate phosphoribohydrolase (1) |                                                                                                                                                                                                                                                                                                                                                                                   | LOG family [IPR031100] (1)                                                                                                                                                                                                                                                                                                  | -                           | C_unihir_00029_mRNA_70.1   | -                           |
| GF0033993 | 0                        | 1                       | 1                        | 0 Translation initiation factor SLU1 (1)                       | translation initiation factor activity [GO:0003743 molecular_function] (1); translational initiation [GO:0006413 biological_process] (1)                                                                                                                                                                                                                                          | Translation initiation factor SLU1 [IPR001950] (1); Eukaryotic translation initiation factor SLU1 [IPR005874] (1)                                                                                                                                                                                                           | -                           | C_unihir_00029_mRNA_69.1   | -                           |

| ID        | Num. in C. crottenstei | Num in C. auris | Num in P.trifidatus | Note                                                           | GO                                                                                                                                                                                                                                                                                                                                                             | InterPro                                                                                                                                                                                                                                                    | Members in C. crotonstei | Members in C. auris       | Members in P. trifidatus |
|-----------|------------------------|-----------------|---------------------|----------------------------------------------------------------|----------------------------------------------------------------------------------------------------------------------------------------------------------------------------------------------------------------------------------------------------------------------------------------------------------------------------------------------------------------|-------------------------------------------------------------------------------------------------------------------------------------------------------------------------------------------------------------------------------------------------------------|--------------------------|---------------------------|--------------------------|
| GF0033992 | 0                      | 1               | 1                   | 0 Hypothetical protein (1)                                     | peroxidase activity [GO:0004601<br>molecular_function] (1); oxidation-reduction process [GO:0055114<br>biological_process] (1); heme binding [GO:0002037 molecular_function] (1); response to oxidative stress [GO:0000979 biological_process] (1)                                                                                                             | Hem peroxidase [IPRO10255] (1); Peroxidase, active site [IPRO19794] (1); Hem peroxidase, plant/fungal/bacterial [IPRO2016] (1)                                                                                                                              | -                        | C_unihir_00029_mRNA_63.1  | -                        |
| GF0033991 | 0                      | 1               | 1                   | 0 DUF247 domain protein (1)                                    | -                                                                                                                                                                                                                                                                                                                                                              | Protein of unknown function DUF247, plant [IPRO04158] (1)                                                                                                                                                                                                   | -                        | C_unihir_00029_mRNA_62.1  | -                        |
| GF0033990 | 0                      | 1               | 1                   | 0 Hypothetical protein (1)                                     | -                                                                                                                                                                                                                                                                                                                                                              | Protein kinase-like domain [IPRO11009] (1)                                                                                                                                                                                                                  | -                        | C_unihir_00029_mRNA_55.1  | -                        |
| GF0033989 | 0                      | 1               | 1                   | 0 Hypothetical protein (1)                                     | -                                                                                                                                                                                                                                                                                                                                                              | Protein of unknown function DUF247, plant [IPRO04158] (1)                                                                                                                                                                                                   | -                        | C_unihir_00029_mRNA_53.1  | -                        |
| GF0033988 | 0                      | 1               | 1                   | 0 Hypothetical protein (1)                                     | -                                                                                                                                                                                                                                                                                                                                                              | Terpenoid cyclase/protein prenyltransferase alpha-alpha toroid [IPRO08930] (1)                                                                                                                                                                              | -                        | C_unihir_00029_mRNA_48.1  | -                        |
| GF0033987 | 0                      | 1               | 1                   | 0 Hypothetical protein (1)                                     | -                                                                                                                                                                                                                                                                                                                                                              | -                                                                                                                                                                                                                                                           | -                        | C_unihir_00029_mRNA_38.1  | -                        |
| GF0033986 | 0                      | 1               | 1                   | 0 Hypothetical protein (1)                                     | -                                                                                                                                                                                                                                                                                                                                                              | -                                                                                                                                                                                                                                                           | -                        | C_unihir_00029_mRNA_32.1  | -                        |
| GF0033985 | 0                      | 1               | 1                   | 0 Mitogen-activated protein kinase 7 (1)                       | protein kinase activity [GO:0004672 molecular_function] (1); protein phosphorylation [GO:0006468 biological_process] (1); ATP binding [GO:0005524 molecular_function] (1)                                                                                                                                                                                      | Protein kinase-like domain [IPRO11009] (1); Protein kinase domain [IPRO00719] (1); Serine/threonine-protein kinase, active site [IPRO08271] (1); Serine/threonine dual specificity protein kinase, catalytic domain [IPRO02290] (1)                         | -                        | C_unihir_00029_mRNA_31.1  | -                        |
| GF0033984 | 0                      | 1               | 1                   | 0 Hypothetical protein (1)                                     | -                                                                                                                                                                                                                                                                                                                                                              | -                                                                                                                                                                                                                                                           | -                        | C_unihir_00029_mRNA_12.1  | -                        |
| GF0033983 | 0                      | 1               | 1                   | 0 [Protein-Pi] arylphosphatase (1)                             | metabolic process [GO:0008152 biological_process] (1); amino acid binding [GO:0101697 molecular_function] (1)                                                                                                                                                                                                                                                  | ACT domain [IPRO02912] (1)                                                                                                                                                                                                                                  | -                        | C_unihir_00028_mRNA_80.1  | -                        |
| GF0033982 | 0                      | 1               | 1                   | 0 Hypothetical protein (1)                                     | nucleotide binding [GO:0001666 molecular_function] (1)                                                                                                                                                                                                                                                                                                         | Nucleotide-binding alpha-beta plait domain [IPRO12677] (1)                                                                                                                                                                                                  | -                        | C_unihir_00028_mRNA_71.1  | -                        |
| GF0033981 | 0                      | 1               | 1                   | 0 Hypothetical protein (1)                                     | -                                                                                                                                                                                                                                                                                                                                                              | -                                                                                                                                                                                                                                                           | -                        | C_unihir_00028_mRNA_7.1   | -                        |
| GF0033980 | 0                      | 1               | 1                   | 0 Hypothetical protein (1)                                     | -                                                                                                                                                                                                                                                                                                                                                              | -                                                                                                                                                                                                                                                           | -                        | C_unihir_00028_mRNA_6.1   | -                        |
| GF0033979 | 0                      | 1               | 1                   | 0 Hypothetical protein (1)                                     | -                                                                                                                                                                                                                                                                                                                                                              | -                                                                                                                                                                                                                                                           | -                        | C_unihir_00028_mRNA_48.1  | -                        |
| GF0033978 | 0                      | 1               | 1                   | 0 Retinoyl-related Pol polypeptin from transposon TNT 1.94 (1) | -                                                                                                                                                                                                                                                                                                                                                              | -                                                                                                                                                                                                                                                           | -                        | C_unihir_00028_mRNA_39.1  | -                        |
| GF0033977 | 0                      | 1               | 1                   | 0 Hypothetical protein (1)                                     | -                                                                                                                                                                                                                                                                                                                                                              | Arabidopsis retrotransposon Orf1 [IPRO04312] (1)                                                                                                                                                                                                            | -                        | C_unihir_00028_mRNA_34.1  | -                        |
| GF0033976 | 0                      | 1               | 1                   | 0 Hypothetical protein (1)                                     | -                                                                                                                                                                                                                                                                                                                                                              | -                                                                                                                                                                                                                                                           | -                        | C_unihir_00028_mRNA_32.1  | -                        |
| GF0033975 | 0                      | 1               | 1                   | 0 Hypothetical protein (1)                                     | -                                                                                                                                                                                                                                                                                                                                                              | -                                                                                                                                                                                                                                                           | -                        | C_unihir_00028_mRNA_27.1  | -                        |
| GF0033974 | 0                      | 1               | 1                   | 0 Importin subunit alpha (1)                                   | protein import into nucleus [GO:0006666 biological_process] (1); cytoplasm [GO:0005773 cellular_component] (1); protein transport activity [GO:0008565 molecular_function] (1); nucleus [GO:0005634 cellular_component] (1); binding [GO:0005486 molecular_function] (1); protein binding [GO:0005515 molecular_function] (1)                                  | Armadiillo [IPRO00225] (1); Importin subunit alpha [IPRO24931] (1); Armadiillo-like helical [IPRO11989] (1); Armadiillo-type 608 [IPRO16628] (1)                                                                                                            | -                        | C_unihir_00028_mRNA_23.1  | -                        |
| GF0033973 | 0                      | 1               | 1                   | 0 Hypothetical protein (1)                                     | -                                                                                                                                                                                                                                                                                                                                                              | -                                                                                                                                                                                                                                                           | -                        | C_unihir_00028_mRNA_17.1  | -                        |
| GF0033972 | 0                      | 1               | 1                   | 0 Hypothetical protein (1)                                     | -                                                                                                                                                                                                                                                                                                                                                              | -                                                                                                                                                                                                                                                           | -                        | C_unihir_00028_mRNA_10.1  | -                        |
| GF0033971 | 0                      | 1               | 1                   | 0 Hypothetical protein (1)                                     | -                                                                                                                                                                                                                                                                                                                                                              | -                                                                                                                                                                                                                                                           | -                        | C_unihir_00027_mRNA_83.1  | -                        |
| GF0033970 | 0                      | 1               | 1                   | 0 Hypothetical protein (1)                                     | ribosome [GO:0005840 cellular_component] (1); structural constituent of ribosome [GO:0003735 molecular_function] (1); translation [GO:0006412 biological_process] (1); structural [GO:0009622 cellular_component] (1)                                                                                                                                          | Ribosomal protein S6/ribosomal biogenesis NS2A [IPRO02309] (1); Ribosomal protein S6 [IPRO01047] (1)                                                                                                                                                        | -                        | C_unihir_00027_mRNA_51.1  | -                        |
| GF0033969 | 0                      | 1               | 1                   | 0 Hypothetical protein (1)                                     | -                                                                                                                                                                                                                                                                                                                                                              | -                                                                                                                                                                                                                                                           | -                        | C_unihir_00027_mRNA_49.1  | -                        |
| GF0033968 | 0                      | 1               | 1                   | 0 Hypothetical protein (1)                                     | nucleotide binding [GO:0001666 molecular_function] (1); nucleic acid binding [GO:0003676 molecular_function] (1)                                                                                                                                                                                                                                               | Nucleotide-binding alpha-beta plait domain [IPRO12677] (1); RNA recognition motif domain [IPRO00504] (1)                                                                                                                                                    | -                        | C_unihir_00027_mRNA_37.1  | -                        |
| GF0033967 | 0                      | 1               | 1                   | 0 Serine/threonine-protein kinase PRS1 (1)                     | protein kinase activity [GO:0004672 molecular_function] (1); protein phosphorylation [GO:0006468 biological_process] (1); ATP binding [GO:0005524 molecular_function] (1)                                                                                                                                                                                      | Protein kinase-like domain [IPRO11009] (1); Protein kinase domain [IPRO00719] (1); Serine/threonine-protein kinase, active site [IPRO08271] (1)                                                                                                             | -                        | C_unihir_00027_mRNA_26.1  | -                        |
| GF0033966 | 0                      | 1               | 1                   | 0 Hypothetical protein (1)                                     | -                                                                                                                                                                                                                                                                                                                                                              | -                                                                                                                                                                                                                                                           | -                        | C_unihir_00026_mRNA_85.1  | -                        |
| GF0033965 | 0                      | 1               | 1                   | 0 Hypothetical protein (1)                                     | -                                                                                                                                                                                                                                                                                                                                                              | -                                                                                                                                                                                                                                                           | -                        | C_unihir_00026_mRNA_58.1  | -                        |
| GF0033964 | 0                      | 1               | 1                   | 0 Hydroquinone glycoxytransferase (1)                          | metabolic process [GO:0008152 biological_process] (1); transferase activity, transferring hexoyl groups [GO:0016758 molecular_function] (1)                                                                                                                                                                                                                    | UDP-glucuronoyl/UDP-glucosyltransferase [IPRO02213] (1)                                                                                                                                                                                                     | -                        | C_unihir_00026_mRNA_57.1  | -                        |
| GF0033963 | 0                      | 1               | 1                   | 0 Hypothetical protein (1)                                     | -                                                                                                                                                                                                                                                                                                                                                              | Pentatricopeptide repeat [IPRO02885] (1)                                                                                                                                                                                                                    | -                        | C_unihir_00026_mRNA_5.1   | -                        |
| GF0033962 | 0                      | 1               | 1                   | 0 Hypothetical protein (1)                                     | -                                                                                                                                                                                                                                                                                                                                                              | Leucine-rich repeat-containing N-terminal, plant-type [IPRO13210] (1); Leucine-rich repeat domain, L domain-like [IPRO02975] (1)                                                                                                                            | -                        | C_unihir_00026_mRNA_26.1  | -                        |
| GF0033961 | 0                      | 1               | 1                   | 0 Hypothetical protein (1)                                     | -                                                                                                                                                                                                                                                                                                                                                              | -                                                                                                                                                                                                                                                           | -                        | C_unihir_00026_mRNA_24.1  | -                        |
| GF0033960 | 0                      | 1               | 1                   | 0 Hypothetical protein (1)                                     | -                                                                                                                                                                                                                                                                                                                                                              | -                                                                                                                                                                                                                                                           | -                        | C_unihir_00026_mRNA_23.1  | -                        |
| GF0033959 | 0                      | 1               | 1                   | 0 Hypothetical protein (1)                                     | -                                                                                                                                                                                                                                                                                                                                                              | -                                                                                                                                                                                                                                                           | -                        | C_unihir_00026_mRNA_18.1  | -                        |
| GF0033958 | 0                      | 1               | 1                   | 0 Hypothetical protein (1)                                     | -                                                                                                                                                                                                                                                                                                                                                              | -                                                                                                                                                                                                                                                           | -                        | C_unihir_00026_mRNA_17.1  | -                        |
| GF0033957 | 0                      | 1               | 1                   | 0 Hypothetical protein (1)                                     | -                                                                                                                                                                                                                                                                                                                                                              | -                                                                                                                                                                                                                                                           | -                        | C_unihir_00026_mRNA_1.1   | -                        |
| GF0033956 | 0                      | 1               | 1                   | 0 Hypothetical protein (1)                                     | -                                                                                                                                                                                                                                                                                                                                                              | -                                                                                                                                                                                                                                                           | -                        | C_unihir_00025_mRNA_95.1  | -                        |
| GF0033955 | 0                      | 1               | 1                   | 0 Hypothetical protein (1)                                     | DNA binding [GO:0003677 molecular_function] (1); regulation of transcription, DNA-templated [GO:0006355 biological_process] (1)                                                                                                                                                                                                                                | NAC domain [IPRO03441] (1)                                                                                                                                                                                                                                  | -                        | C_unihir_00025_mRNA_94.1  | -                        |
| GF0033954 | 0                      | 1               | 1                   | 0 Hypothetical protein (1)                                     | -                                                                                                                                                                                                                                                                                                                                                              | -                                                                                                                                                                                                                                                           | -                        | C_unihir_00025_mRNA_90.1  | -                        |
| GF0033953 | 0                      | 1               | 1                   | 0 Hypothetical protein (1)                                     | -                                                                                                                                                                                                                                                                                                                                                              | -                                                                                                                                                                                                                                                           | -                        | C_unihir_00025_mRNA_83.1  | -                        |
| GF0033952 | 0                      | 1               | 1                   | 0 Hypothetical protein (1)                                     | -                                                                                                                                                                                                                                                                                                                                                              | -                                                                                                                                                                                                                                                           | -                        | C_unihir_00025_mRNA_78.1  | -                        |
| GF0033951 | 0                      | 1               | 1                   | 0 Hypothetical protein (1)                                     | protein binding [GO:0005515 molecular_function] (1)                                                                                                                                                                                                                                                                                                            | Elongated TPR repeat-containing domain [IPRO23114] (1); Tetra- and hepta-peptide-like helical domain [IPRO11990] (1)                                                                                                                                        | -                        | C_unihir_00025_mRNA_75.1  | -                        |
| GF0033950 | 0                      | 1               | 1                   | 0 Hypothetical protein (1)                                     | -                                                                                                                                                                                                                                                                                                                                                              | -                                                                                                                                                                                                                                                           | -                        | C_unihir_00025_mRNA_73.1  | -                        |
| GF0033949 | 0                      | 1               | 1                   | 0 Putative SET domain protein SDG117 (1)                       | histone lysine methylation [GO:0034968 biological_process] (1); nucleus [GO:0005634 cellular_component] (1); metal ion binding [GO:0004682 molecular_function] (1); zinc ion binding [GO:0008270 molecular_function] (1); histone-lysine N-methyltransferase activity [GO:0018024 molecular_function] (1); protein binding [GO:0005515 molecular_function] (1) | Post-SET domain [IPRO03616] (1); Zinc finger, CH2 [IPRO07087] (1); Zinc finger, CH2-like [IPRO15808] (1); Pre-SET zinc-binding sub-group [IPRO03606] (1); Pre-SET domain [IPRO07785] (1); SET domain [IPRO01214] (1)                                        | -                        | C_unihir_00025_mRNA_61.1  | -                        |
| GF0033948 | 0                      | 1               | 1                   | 0 Hypothetical protein (1)                                     | methytransferase activity [GO:0008168 molecular_function] (1)                                                                                                                                                                                                                                                                                                  | Zinc finger, CCHC-type, TRM13 [IPRO21721] (1)                                                                                                                                                                                                               | -                        | C_unihir_00025_mRNA_60.1  | -                        |
| GF0033947 | 0                      | 1               | 1                   | 0 Hypothetical protein (1)                                     | -                                                                                                                                                                                                                                                                                                                                                              | -                                                                                                                                                                                                                                                           | -                        | C_unihir_00025_mRNA_6.1   | -                        |
| GF0033946 | 0                      | 1               | 1                   | 0 Hypothetical protein (1)                                     | -                                                                                                                                                                                                                                                                                                                                                              | -                                                                                                                                                                                                                                                           | -                        | C_unihir_00025_mRNA_58.1  | -                        |
| GF0033945 | 0                      | 1               | 1                   | 0 Rhomboidase P protein subunit P28-related isoform 1 (1)      | integral component of membrane [GO:0016021 cellular_component] (1)                                                                                                                                                                                                                                                                                             | Protein kinase-like domain [IPRO11009] (1); Cold-regulated 413 protein [IPRO08922] (1)                                                                                                                                                                      | -                        | C_unihir_00025_mRNA_54.1  | -                        |
| GF0033944 | 0                      | 1               | 1                   | 0 Hypothetical protein (1)                                     | -                                                                                                                                                                                                                                                                                                                                                              | -                                                                                                                                                                                                                                                           | -                        | C_unihir_00025_mRNA_50.1  | -                        |
| GF0033943 | 0                      | 1               | 1                   | 0 Pentatricopeptide repeat-containing protein At2g01360 (1)    | metabolic process [GO:0008152 biological_process] (1); transferase activity, transferring hexoyl groups [GO:0016758 molecular_function] (1)                                                                                                                                                                                                                    | UDP-glucuronoyl/UDP-glucosyltransferase [IPRO02213] (1)                                                                                                                                                                                                     | -                        | C_unihir_00025_mRNA_45.1  | -                        |
| GF0033942 | 0                      | 1               | 1                   | 0 Hypothetical protein (1)                                     | -                                                                                                                                                                                                                                                                                                                                                              | -                                                                                                                                                                                                                                                           | -                        | C_unihir_00025_mRNA_34.1  | -                        |
| GF0033940 | 0                      | 1               | 1                   | 0 Hypothetical protein (1)                                     | -                                                                                                                                                                                                                                                                                                                                                              | -                                                                                                                                                                                                                                                           | -                        | C_unihir_00025_mRNA_27.1  | -                        |
| GF0033939 | 0                      | 1               | 1                   | 0 Hypothetical protein (1)                                     | -                                                                                                                                                                                                                                                                                                                                                              | -                                                                                                                                                                                                                                                           | -                        | C_unihir_00025_mRNA_26.1  | -                        |
| GF0033938 | 0                      | 1               | 1                   | 0 Hypothetical protein (1)                                     | -                                                                                                                                                                                                                                                                                                                                                              | -                                                                                                                                                                                                                                                           | -                        | C_unihir_00025_mRNA_22.1  | -                        |
| GF0033937 | 0                      | 1               | 1                   | 0 Hypothetical protein (1)                                     | -                                                                                                                                                                                                                                                                                                                                                              | -                                                                                                                                                                                                                                                           | -                        | C_unihir_00025_mRNA_15.1  | -                        |
| GF0033936 | 0                      | 1               | 1                   | 0 Transmembrane amino acid transporter family protein (1)      | -                                                                                                                                                                                                                                                                                                                                                              | Amino acid transporter, transmembrane domain [IPRO13057] (1)                                                                                                                                                                                                | -                        | C_unihir_00024_mRNA_86.1  | -                        |
| GF0033935 | 0                      | 1               | 1                   | 0 Amino acid permease 8 (1)                                    | -                                                                                                                                                                                                                                                                                                                                                              | Amino acid transporter, transmembrane domain [IPRO13057] (1)                                                                                                                                                                                                | -                        | C_unihir_00024_mRNA_85.1  | -                        |
| GF0033934 | 0                      | 1               | 1                   | 0 Hypothetical protein (1)                                     | protein binding [GO:0005515 molecular_function] (1)                                                                                                                                                                                                                                                                                                            | F-box domain [IPRO01810] (1)                                                                                                                                                                                                                                | -                        | C_unihir_00024_mRNA_83.1  | -                        |
| GF0033933 | 0                      | 1               | 1                   | 0 Hypothetical protein (1)                                     | -                                                                                                                                                                                                                                                                                                                                                              | -                                                                                                                                                                                                                                                           | -                        | C_unihir_00024_mRNA_7.1   | -                        |
| GF0033932 | 0                      | 1               | 1                   | 0 Serine carboxypeptidase-like 6 (1)                           | proteolysis [GO:0006508 biological_process] (1); serine-type carboxypeptidase activity [GO:0004188 molecular_function] (1)                                                                                                                                                                                                                                     | Alpha-beta hydrolase fold [IPRO29058] (1); Peptidase S10, serine carboxypeptidase [IPRO01663] (1)                                                                                                                                                           | -                        | C_unihir_00024_mRNA_66.1  | -                        |
| GF0033931 | 0                      | 1               | 1                   | 0 Hypothetical protein (1)                                     | -                                                                                                                                                                                                                                                                                                                                                              | -                                                                                                                                                                                                                                                           | -                        | C_unihir_00024_mRNA_61.1  | -                        |
| GF0033930 | 0                      | 1               | 1                   | 0 Hypothetical protein (1)                                     | -                                                                                                                                                                                                                                                                                                                                                              | -                                                                                                                                                                                                                                                           | -                        | C_unihir_00024_mRNA_54.1  | -                        |
| GF0033929 | 0                      | 1               | 1                   | 0 Hypothetical protein (1)                                     | -                                                                                                                                                                                                                                                                                                                                                              | -                                                                                                                                                                                                                                                           | -                        | C_unihir_00024_mRNA_53.1  | -                        |
| GF0033928 | 0                      | 1               | 1                   | 0 Glycoyl hydrolase family 10 protein (1)                      | carbohydrate metabolic process [GO:0005979 biological_process] (1); hydrolase activity, hydrolyzing O-glycosyl compounds [GO:0004655 molecular_function] (1); hydrolase activity, acting on glycosyl bonds [GO:0016798 molecular_function] (1)                                                                                                                 | Galactose-binding domain-like [IPRO08979] (1); Carbohydrate-binding, Cmc-like [IPRO03305] (1); Glycoside hydrolase family 10 domain [IPRO01000] (1); Glycoside hydrolase superfamily [IPRO17853] (1); Glycoside hydrolase, catalytic domain [IPRO13781] (1) | -                        | C_unihir_00024_mRNA_45.1  | -                        |
| GF0033927 | 0                      | 1               | 1                   | 0 Hypothetical protein (1)                                     | -                                                                                                                                                                                                                                                                                                                                                              | -                                                                                                                                                                                                                                                           | -                        | C_unihir_00024_mRNA_42.1  | -                        |
| GF0033926 | 0                      | 1               | 1                   | 0 Hypothetical protein (1)                                     | -                                                                                                                                                                                                                                                                                                                                                              | -                                                                                                                                                                                                                                                           | -                        | C_unihir_00024_mRNA_33.1  | -                        |
| GF0033925 | 0                      | 1               | 1                   | 0 Tharedoxin domain-containing protein 9 like (1)              | -                                                                                                                                                                                                                                                                                                                                                              | -                                                                                                                                                                                                                                                           | -                        | C_unihir_00024_mRNA_3.1   | -                        |
| GF0033924 | 0                      | 1               | 1                   | 0 Hypothetical protein (1)                                     | -                                                                                                                                                                                                                                                                                                                                                              | -                                                                                                                                                                                                                                                           | -                        | C_unihir_00024_mRNA_21.1  | -                        |
| GF0033923 | 0                      | 1               | 1                   | 0 Hypothetical protein (1)                                     | -                                                                                                                                                                                                                                                                                                                                                              | GH3 family [IPRO04993] (1)                                                                                                                                                                                                                                  | -                        | C_unihir_00024_mRNA_2.1   | -                        |
| GF0033922 | 0                      | 1               | 1                   | 0 Branched-chain-amino-acid aminotransferase isoform 2 (1)     | metabolic process [GO:0008152 biological_process] (1); catalytic activity [GO:0003624 molecular_function] (1)                                                                                                                                                                                                                                                  | Aminotransferase class IV [IPRO01544] (1)                                                                                                                                                                                                                   | -                        | C_unihir_00024_mRNA_110.1 | -                        |
| GF0033921 | 0                      | 1               | 1                   | 0 Branched-chain-amino-acid transaminase (1)                   | metabolic process [GO:0008152 biological_process] (1); catalytic activity [GO:0003624 molecular_function] (1)                                                                                                                                                                                                                                                  | Aminotransferase class IV [IPRO01544] (1)                                                                                                                                                                                                                   | -                        | C_unihir_00024_mRNA_109.1 | -                        |
| GF0033920 | 0                      | 1               | 1                   | 0 Hypothetical protein (1)                                     | -                                                                                                                                                                                                                                                                                                                                                              | Cysteine-rich secretory protein, allergen V2/Type-v-related [IPRO01283] (1); CAP domain [IPRO14044] (1)                                                                                                                                                     | -                        | C_unihir_00024_mRNA_108.1 | -                        |
| GF0033919 | 0                      | 1               | 1                   | 0 Hypothetical protein (1)                                     | -                                                                                                                                                                                                                                                                                                                                                              | -                                                                                                                                                                                                                                                           | -                        | C_unihir_00024_mRNA_1.1   | -                        |
| GF0033918 | 0                      | 1               | 1                   | 0 Hypothetical protein (1)                                     | -                                                                                                                                                                                                                                                                                                                                                              | -                                                                                                                                                                                                                                                           | -                        | C_unihir_00023_mRNA_9.1   | -                        |



| ID        | Num. in <i>C. crotchiense</i> | Num in <i>C. caudis</i> | Num in <i>P. trifidatus</i> | Note                                                                        | GO                                                                                                                                                                                                                                                                                                                                                                                                                                                                                                                                                                                                   | InterPro                                                                                                                                                                                                                                                                                                                                                                                                                                                                                                        | Members in <i>C. crotchiense</i> | Members in <i>C. caudis</i> | Members in <i>P. trifidatus</i> |
|-----------|-------------------------------|-------------------------|-----------------------------|-----------------------------------------------------------------------------|------------------------------------------------------------------------------------------------------------------------------------------------------------------------------------------------------------------------------------------------------------------------------------------------------------------------------------------------------------------------------------------------------------------------------------------------------------------------------------------------------------------------------------------------------------------------------------------------------|-----------------------------------------------------------------------------------------------------------------------------------------------------------------------------------------------------------------------------------------------------------------------------------------------------------------------------------------------------------------------------------------------------------------------------------------------------------------------------------------------------------------|----------------------------------|-----------------------------|---------------------------------|
| GF0033917 | 0                             | 1                       | 0                           | Hypothetical protein (1)                                                    |                                                                                                                                                                                                                                                                                                                                                                                                                                                                                                                                                                                                      |                                                                                                                                                                                                                                                                                                                                                                                                                                                                                                                 |                                  | C_umshii_00023_mRNA_63.1    |                                 |
| GF0033916 | 0                             | 1                       | 0                           | Hypothetical protein (1)                                                    |                                                                                                                                                                                                                                                                                                                                                                                                                                                                                                                                                                                                      |                                                                                                                                                                                                                                                                                                                                                                                                                                                                                                                 |                                  | C_umshii_00023_mRNA_28.1    |                                 |
| GF0033915 | 0                             | 1                       | 0                           | Hypothetical protein (1)                                                    | catalytic activity [GO:0003824 molecular_function] (1)                                                                                                                                                                                                                                                                                                                                                                                                                                                                                                                                               | Pyridoxal phosphate-dependent transaminase, major region, subdomain 1 [IPR015421] (1); Pyridoxal phosphate-dependent transaminase [IPR015424] (1)                                                                                                                                                                                                                                                                                                                                                               |                                  | C_umshii_00023_mRNA_15.1    |                                 |
| GF0033914 | 0                             | 1                       | 0                           | Hypothetical protein (1)                                                    | nitrogen compound metabolic process [GO:0006077 biological_process] (1); hydrolase activity, acting on carbon-nitrogen (but not peptide) bonds [GO:001610 molecular_function] (1)                                                                                                                                                                                                                                                                                                                                                                                                                    | Carbon-nitrogen hydrolase [IPR003010] (1)                                                                                                                                                                                                                                                                                                                                                                                                                                                                       |                                  | C_umshii_00023_mRNA_1.1     |                                 |
| GF0033913 | 0                             | 1                       | 0                           | Hypothetical protein (1)                                                    | pyruvate kinase activity [GO:0004743 molecular_function] (1); glycolytic process [GO:0006096 biological_process] (1); nitrogen compound metabolic process [GO:0006077 biological_process] (1); magnesium ion binding [GO:0002057 molecular_function] (1); catalytic activity [GO:0003824 molecular_function] (1); potassium ion binding [GO:0003955 molecular_function] (1); hydrolase activity, acting on carbon-nitrogen (but not peptide) bonds [GO:001610 molecular_function] (1)                                                                                                                | Pyruvate kinase-like, insert domain [IPR010371] (1); Pyruvate kinase [IPR014697] (1); Pyruvate:Phosphoenolpyruvate kinase-like domain [IPR015813] (1); Pyruvate kinase, beta-barrel insert domain [IPR015806] (1); Carbon-nitrogen hydrolase [IPR003010] (1); Pyruvate kinase, barrel [IPR015793] (1)                                                                                                                                                                                                           |                                  | C_umshii_00022_mRNA_85.1    |                                 |
| GF0033912 | 0                             | 1                       | 0                           | Hypothetical protein (1)                                                    |                                                                                                                                                                                                                                                                                                                                                                                                                                                                                                                                                                                                      |                                                                                                                                                                                                                                                                                                                                                                                                                                                                                                                 |                                  | C_umshii_00022_mRNA_83.1    |                                 |
| GF0033911 | 0                             | 1                       | 0                           | Hypothetical protein (1)                                                    |                                                                                                                                                                                                                                                                                                                                                                                                                                                                                                                                                                                                      |                                                                                                                                                                                                                                                                                                                                                                                                                                                                                                                 |                                  | C_umshii_00022_mRNA_24.1    |                                 |
| GF0033910 | 0                             | 1                       | 0                           | Hypothetical protein (1)                                                    |                                                                                                                                                                                                                                                                                                                                                                                                                                                                                                                                                                                                      |                                                                                                                                                                                                                                                                                                                                                                                                                                                                                                                 |                                  | C_umshii_00022_mRNA_16.1    |                                 |
| GF0033909 | 0                             | 1                       | 0                           | Hypothetical protein (1)                                                    |                                                                                                                                                                                                                                                                                                                                                                                                                                                                                                                                                                                                      |                                                                                                                                                                                                                                                                                                                                                                                                                                                                                                                 |                                  | C_umshii_00022_mRNA_14.1    |                                 |
| GF0033908 | 0                             | 1                       | 0                           | Hypothetical protein (1)                                                    |                                                                                                                                                                                                                                                                                                                                                                                                                                                                                                                                                                                                      |                                                                                                                                                                                                                                                                                                                                                                                                                                                                                                                 |                                  | C_umshii_00022_mRNA_9.1     |                                 |
| GF0033907 | 0                             | 1                       | 0                           | Hypothetical protein (1)                                                    | vitamin B6 biosynthetic process [GO:0042819 biological_process] (1); pyridoxal phosphate biosynthesis process [GO:0042822 biological_process] (1); metabolic process [GO:0008152 biological_process] (1); catalytic activity [GO:0003824 molecular_function] (1); binding [GO:0005488 molecular_function] (1); transposase activity [GO:0004800 molecular_function] (1); protein binding [GO:0005515 molecular_function] (1); zinc ion binding [GO:0002070 molecular_function] (1); transposition, DNA-mediated [GO:0006313 biological_process] (1); DNA binding [GO:0003677 molecular_function] (1) | Ribulose-phosphate binding barrel [IPR011660] (1); Pyruvate 5-phosphate synthase subunit Pds/SNZ [IPR013422] (1); Alkylase-type TIM barrel [IPR013785] (4); Armadillo-type 6d [IPR016024] (1); Transposase, MuIR, plant [IPR043512] (1); Transposase, mariner type [IPR012071] (1); Armadillo-like helical [IPR011989] (1); Zinc finger, PAZ-type [IPR06564] (1); MULE transposase domain [IPR018289] (1); Zinc finger, SWIM-type [IPR07271] (1); Armadillo [IPR00251] (1); Atypical Arm repeat [IPR052413] (1) |                                  | C_umshii_00021_mRNA_85.1    |                                 |
| GF0033906 | 0                             | 1                       | 0                           | Hypothetical protein (1)                                                    |                                                                                                                                                                                                                                                                                                                                                                                                                                                                                                                                                                                                      |                                                                                                                                                                                                                                                                                                                                                                                                                                                                                                                 |                                  | C_umshii_00021_mRNA_8.1     |                                 |
| GF0033905 | 0                             | 1                       | 0                           | Hypothetical protein (1)                                                    | lignin catabolic process [GO:0046274 biological_process] (1); apoptosis [GO:0043044 cellular_process] (1); copper ion binding [GO:0005507 molecular_function] (1); oxidoreductase activity [GO:0001649 molecular_function] (1); oxidoreduction process [GO:0005514 biological_process] (1); hydroquinone oxygen oxidoreductase activity [GO:0052716 molecular_function] (1)                                                                                                                                                                                                                          | Multicopper oxidase, type 1 [IPR001117] (1); Multicopper oxidase, conserved site [IPR031381] (1); Laccase [IPR017761] (1); Multicopper oxidase, type 2 [IPR011700] (1); Cupredoxin [IPR008972] (1); Multicopper oxidase, copper-binding site [IPR002355] (1)                                                                                                                                                                                                                                                    |                                  | C_umshii_00021_mRNA_6.1     |                                 |
| GF0033903 | 0                             | 1                       | 0                           | Hypothetical protein (1)                                                    |                                                                                                                                                                                                                                                                                                                                                                                                                                                                                                                                                                                                      |                                                                                                                                                                                                                                                                                                                                                                                                                                                                                                                 |                                  | C_umshii_00021_mRNA_45.1    |                                 |
| GF0033902 | 0                             | 1                       | 0                           | Hypothetical protein (1)                                                    |                                                                                                                                                                                                                                                                                                                                                                                                                                                                                                                                                                                                      |                                                                                                                                                                                                                                                                                                                                                                                                                                                                                                                 |                                  | C_umshii_00021_mRNA_39.1    |                                 |
| GF0033901 | 0                             | 1                       | 0                           | Cytochrome P450 82A3 (1)                                                    | oxidation-reduction process [GO:0005514 biological_process] (1); oxidoreductase activity, acting on paired donors, with incorporation or reduction of molecular oxygen [GO:0016765 molecular_function] (1); iron ion binding [GO:0005509 molecular_function] (1); heme binding [GO:0020037 molecular_function] (1)                                                                                                                                                                                                                                                                                   | Cytochrome P450, E-class, group I [IPR024011] (1); Cytochrome P450 [IPR001128] (1)                                                                                                                                                                                                                                                                                                                                                                                                                              |                                  | C_umshii_00021_mRNA_25.1    |                                 |
| GF0033900 | 0                             | 1                       | 0                           | Importin subunit alpha (1)                                                  | binding [GO:0005488 molecular_function] (1); protein binding [GO:0005515 molecular_function] (1)                                                                                                                                                                                                                                                                                                                                                                                                                                                                                                     | Armadillo-type 6d [IPR016024] (1); Armadillo [IPR000225] (1); Atypical Arm repeat [IPR032413] (1); Armadillo-like helical [IPR011989] (1)                                                                                                                                                                                                                                                                                                                                                                       |                                  | C_umshii_00021_mRNA_18.1    |                                 |
| GF0033899 | 0                             | 1                       | 0                           | Hypothetical protein (1)                                                    |                                                                                                                                                                                                                                                                                                                                                                                                                                                                                                                                                                                                      |                                                                                                                                                                                                                                                                                                                                                                                                                                                                                                                 |                                  | C_umshii_00021_mRNA_15.1    |                                 |
| GF0033898 | 0                             | 1                       | 0                           | Hypothetical protein (1)                                                    |                                                                                                                                                                                                                                                                                                                                                                                                                                                                                                                                                                                                      |                                                                                                                                                                                                                                                                                                                                                                                                                                                                                                                 |                                  | C_umshii_00021_mRNA_103.1   |                                 |
| GF0033897 | 0                             | 1                       | 0                           | Hypothetical protein (1)                                                    |                                                                                                                                                                                                                                                                                                                                                                                                                                                                                                                                                                                                      |                                                                                                                                                                                                                                                                                                                                                                                                                                                                                                                 |                                  | C_umshii_00020_mRNA_75.1    |                                 |
| GF0033896 | 0                             | 1                       | 0                           | Hypothetical protein (1)                                                    | carbohydrate metabolic process [GO:0005975 biological_process] (1)                                                                                                                                                                                                                                                                                                                                                                                                                                                                                                                                   | Transposase-associated domain [IPR028400] (1)                                                                                                                                                                                                                                                                                                                                                                                                                                                                   |                                  | C_umshii_00020_mRNA_72.1    |                                 |
| GF0033895 | 0                             | 1                       | 0                           | Hypothetical protein (1)                                                    |                                                                                                                                                                                                                                                                                                                                                                                                                                                                                                                                                                                                      |                                                                                                                                                                                                                                                                                                                                                                                                                                                                                                                 |                                  | C_umshii_00020_mRNA_70.1    |                                 |
| GF0033894 | 0                             | 1                       | 0                           | Hypothetical protein (1)                                                    |                                                                                                                                                                                                                                                                                                                                                                                                                                                                                                                                                                                                      |                                                                                                                                                                                                                                                                                                                                                                                                                                                                                                                 |                                  | C_umshii_00020_mRNA_68.1    |                                 |
| GF0033893 | 0                             | 1                       | 0                           | Anxin-induced protein 10A5 (1)                                              | response to anxin [GO:0009733 biological_process] (1); DNA replication [GO:0006260 biological_process] (1); nuclear origin of replication recognition complex [GO:000564 cellular_component] (1); DNA binding [GO:0005777 molecular_function] (1)                                                                                                                                                                                                                                                                                                                                                    | Small actin- $\alpha$ RNA [IPR003676] (1)                                                                                                                                                                                                                                                                                                                                                                                                                                                                       |                                  | C_umshii_00020_mRNA_64.1    |                                 |
| GF0033892 | 0                             | 1                       | 0                           | Origin recognition complex subunit 3 (1)                                    | DNA replication [GO:0006260 biological_process] (1); nuclear origin of replication recognition complex [GO:000564 cellular_component] (1); DNA binding [GO:0005777 molecular_function] (1)                                                                                                                                                                                                                                                                                                                                                                                                           | Origin recognition complex, subunit 3 [IPR020795] (1)                                                                                                                                                                                                                                                                                                                                                                                                                                                           |                                  | C_umshii_00020_mRNA_57.1    |                                 |
| GF0033891 | 0                             | 1                       | 0                           | Hypothetical protein (1)                                                    | RNA-DNA hybrid ribonuclease activity [GO:0004523 molecular_function] (1); nucleic acid binding [GO:0003676 molecular_function] (1)                                                                                                                                                                                                                                                                                                                                                                                                                                                                   | Ribonuclease H-like domain [IPR012337] (1); Ribonuclease H domain [IPR002150] (1)                                                                                                                                                                                                                                                                                                                                                                                                                               |                                  | C_umshii_00020_mRNA_52.1    |                                 |
| GF0033890 | 0                             | 1                       | 0                           | Hypothetical protein (1)                                                    |                                                                                                                                                                                                                                                                                                                                                                                                                                                                                                                                                                                                      |                                                                                                                                                                                                                                                                                                                                                                                                                                                                                                                 |                                  | C_umshii_00020_mRNA_50.1    |                                 |
| GF0033889 | 0                             | 1                       | 0                           | Hypothetical protein (1)                                                    |                                                                                                                                                                                                                                                                                                                                                                                                                                                                                                                                                                                                      |                                                                                                                                                                                                                                                                                                                                                                                                                                                                                                                 |                                  | C_umshii_00020_mRNA_47.1    |                                 |
| GF0033888 | 0                             | 1                       | 0                           | Mechanosensitive ion channel protein 10 (1)                                 | transmembrane transport [GO:005085 biological_process] (1); membrane [GO:000620 cellular_component] (1)                                                                                                                                                                                                                                                                                                                                                                                                                                                                                              | Harbinger transposase-derived nuclease domain [IPR027000] (1); EF-hand domain pair [IPR011992] (1); L5L domain [IPR010920] (1); Mechanosensitive ion channel MacS-like, plant-Tung [IPR016688] (1); Mechanosensitive ion channel MacS [IPR066685] (1)                                                                                                                                                                                                                                                           |                                  | C_umshii_00020_mRNA_3.1     |                                 |
| GF0033887 | 0                             | 1                       | 0                           | Hypothetical protein (1)                                                    |                                                                                                                                                                                                                                                                                                                                                                                                                                                                                                                                                                                                      |                                                                                                                                                                                                                                                                                                                                                                                                                                                                                                                 |                                  | C_umshii_00020_mRNA_28.1    |                                 |
| GF0033886 | 0                             | 1                       | 0                           | Cytochrome P450 89A2 (1)                                                    | heme binding [GO:0020037 molecular_function] (1); iron ion binding [GO:0005509 molecular_function] (1); oxidation-reduction process [GO:0005514 biological_process] (1); oxidoreductase activity, acting on paired donors, with incorporation or reduction of molecular oxygen [GO:0016765 molecular_function] (1)                                                                                                                                                                                                                                                                                   | Domain of unknown function DUF4283 [IPR025588] (1)                                                                                                                                                                                                                                                                                                                                                                                                                                                              |                                  | C_umshii_00020_mRNA_26.1    |                                 |
| GF0033885 | 0                             | 1                       | 0                           | Ribonucleotide-epiphosphate reductase large subunit (1)                     | oxidation-reduction process [GO:0005514 biological_process] (1); DNA replication [GO:0006260 biological_process] (1)                                                                                                                                                                                                                                                                                                                                                                                                                                                                                 | Ribonucleotide reductase large subunit, C-terminal [IPR007078] (1); Ribonucleotide reductase, class I, alpha subunit [IPR013346] (1); Ribonucleotide reductase-R1 subunit, N-terminal [IPR008926] (1); ATP-ase domain [IPR005144] (1)                                                                                                                                                                                                                                                                           |                                  | C_umshii_00020_mRNA_23.1    |                                 |
| GF0033884 | 0                             | 1                       | 0                           | Hypothetical protein (1)                                                    |                                                                                                                                                                                                                                                                                                                                                                                                                                                                                                                                                                                                      |                                                                                                                                                                                                                                                                                                                                                                                                                                                                                                                 |                                  | C_umshii_00020_mRNA_2.1     |                                 |
| GF0033883 | 0                             | 1                       | 0                           | Hypothetical protein (1)                                                    | translation [GO:0006412 biological_process] (1); structural constituent of ribosome [GO:0003735 molecular_function] (1); ribosome [GO:0005840 cellular_component] (1)                                                                                                                                                                                                                                                                                                                                                                                                                                | Domain of unknown function DUF4283 [IPR025588] (1)                                                                                                                                                                                                                                                                                                                                                                                                                                                              |                                  | C_umshii_00020_mRNA_2.1     |                                 |
| GF0033882 | 0                             | 1                       | 0                           | Hypothetical protein (1)                                                    |                                                                                                                                                                                                                                                                                                                                                                                                                                                                                                                                                                                                      |                                                                                                                                                                                                                                                                                                                                                                                                                                                                                                                 |                                  | C_umshii_00020_mRNA_16.1    |                                 |
| GF0033881 | 0                             | 1                       | 0                           | Alpha.alpha-trehalase (1)                                                   | catalytic activity [GO:0003824 molecular_function] (1); trehalase metabolic process [GO:0000991 biological_process] (1); alpha.alpha-trehalase activity [GO:0004555 molecular_function] (1)                                                                                                                                                                                                                                                                                                                                                                                                          | Ribosomal protein L14b.23c [IPR002181] (1); Ribosomal protein L14 domain [IPR023571] (1)                                                                                                                                                                                                                                                                                                                                                                                                                        |                                  | C_umshii_00019_mRNA_9.1     |                                 |
| GF0033880 | 0                             | 1                       | 0                           | Hypothetical protein (1)                                                    | protein binding [GO:0005515 molecular_function] (1); nucleic acid binding [GO:0003676 molecular_function] (1)                                                                                                                                                                                                                                                                                                                                                                                                                                                                                        | Leucine-rich repeat domain, L domain-like [IPR022675] (1)                                                                                                                                                                                                                                                                                                                                                                                                                                                       |                                  | C_umshii_00019_mRNA_90.1    |                                 |
| GF0033879 | 0                             | 1                       | 0                           | Hypothetical protein (1)                                                    |                                                                                                                                                                                                                                                                                                                                                                                                                                                                                                                                                                                                      |                                                                                                                                                                                                                                                                                                                                                                                                                                                                                                                 |                                  | C_umshii_00019_mRNA_75.1    |                                 |
| GF0033878 | 0                             | 1                       | 0                           | Disease resistance protein (1)                                              | ADP binding [GO:0043531 molecular_function] (1)                                                                                                                                                                                                                                                                                                                                                                                                                                                                                                                                                      | Leucine-rich repeat domain, L domain-like [IPR022675] (1); Leucine-rich repeat, typical subtype [IPR001591] (1); Domain of unknown function DUF4283 [IPR025588] (1); Ribonuclease H-like domain [IPR02377] (1); Reverse transcriptase zinc-binding domain [IPR020960] (1); Leucine-rich repeat [IPR001611] (1); Zinc knuckle CXCXC4HXAC [IPR025836] (1); Leucine-rich repeat-containing N-terminal, plant-type [IPR013101] (1)                                                                                  |                                  | C_umshii_00019_mRNA_75.1    |                                 |
| GF0033877 | 0                             | 1                       | 0                           | Hypothetical protein (1)                                                    |                                                                                                                                                                                                                                                                                                                                                                                                                                                                                                                                                                                                      |                                                                                                                                                                                                                                                                                                                                                                                                                                                                                                                 |                                  | C_umshii_00019_mRNA_47.1    |                                 |
| GF0033876 | 0                             | 1                       | 0                           | C2 calcium lipid-binding plant phospholipase/transferase family protein (1) | protein binding [GO:0005515 molecular_function] (1)                                                                                                                                                                                                                                                                                                                                                                                                                                                                                                                                                  | Leucine-rich repeat domain, L domain-like [IPR022675] (1); Leucine-rich repeat, typical subtype [IPR001591] (1); Domain of unknown function DUF4283 [IPR025588] (1); Ribonuclease H-like domain [IPR02377] (1); Reverse transcriptase zinc-binding domain [IPR020960] (1); Leucine-rich repeat [IPR001611] (1); Zinc knuckle CXCXC4HXAC [IPR025836] (1); Leucine-rich repeat-containing N-terminal, plant-type [IPR013101] (1)                                                                                  |                                  | C_umshii_00018_mRNA_95.1    |                                 |
| GF0033875 | 0                             | 1                       | 0                           | Hypothetical protein (1)                                                    |                                                                                                                                                                                                                                                                                                                                                                                                                                                                                                                                                                                                      |                                                                                                                                                                                                                                                                                                                                                                                                                                                                                                                 |                                  | C_umshii_00018_mRNA_9.1     |                                 |
| GF0033874 | 0                             | 1                       | 0                           | Ribosomal RNA, small subunit methyltransferase G11 (1)                      |                                                                                                                                                                                                                                                                                                                                                                                                                                                                                                                                                                                                      |                                                                                                                                                                                                                                                                                                                                                                                                                                                                                                                 |                                  | C_umshii_00018_mRNA_65.1    |                                 |
| GF0033873 | 0                             | 1                       | 0                           | Hypothetical protein (1)                                                    |                                                                                                                                                                                                                                                                                                                                                                                                                                                                                                                                                                                                      |                                                                                                                                                                                                                                                                                                                                                                                                                                                                                                                 |                                  | C_umshii_00018_mRNA_63.1    |                                 |
| GF0033872 | 0                             | 1                       | 0                           | Hypothetical protein (1)                                                    |                                                                                                                                                                                                                                                                                                                                                                                                                                                                                                                                                                                                      |                                                                                                                                                                                                                                                                                                                                                                                                                                                                                                                 |                                  | C_umshii_00018_mRNA_62.1    |                                 |
| GF0033871 | 0                             | 1                       | 0                           | ATP binding, related (1)                                                    |                                                                                                                                                                                                                                                                                                                                                                                                                                                                                                                                                                                                      |                                                                                                                                                                                                                                                                                                                                                                                                                                                                                                                 |                                  | C_umshii_00018_mRNA_45.1    |                                 |



| ID        | Num. in <i>C. crotolariae</i> | Num. in <i>C. arbutu</i> | Num. in <i>P. trifidata</i> | Note                                                           | GO                                                                                                                                                                                                                                                   | InterPro                                                                                                                                                                                                                                                                                                                                      | Members in <i>Crotolariae</i> | Members in <i>Caustida</i> | Members in <i>Psyllidata</i> |
|-----------|-------------------------------|--------------------------|-----------------------------|----------------------------------------------------------------|------------------------------------------------------------------------------------------------------------------------------------------------------------------------------------------------------------------------------------------------------|-----------------------------------------------------------------------------------------------------------------------------------------------------------------------------------------------------------------------------------------------------------------------------------------------------------------------------------------------|-------------------------------|----------------------------|------------------------------|
| GF0033819 | 0                             | 1                        | 1                           | 0 Anaphase-promoting complex subunit 11 (1)                    | ubiquitin-protein transferase activity [GO:000842 molecular_function] (1); anaphase-promoting complex [GO:0005068 cellular_component] (1); protein binding [GO:0005515 molecular_function] (1); zinc ion binding [GO:0000270 molecular_function] (1) | Anaphase-promoting complex subunit 11 [IPRO24991] (1); Zinc finger, RING-FYVE-PHD-type [IPRO13083] (1); Zinc finger, RING-type [IPRO1841] (1)                                                                                                                                                                                                 |                               | C_unihii_00015_mRNA_13.1   | -                            |
| GF0033818 | 0                             | 1                        | 1                           | 0 Hypothetical protein (1)                                     |                                                                                                                                                                                                                                                      |                                                                                                                                                                                                                                                                                                                                               |                               | C_unihii_00014_mRNA_9.1    | -                            |
| GF0033817 | 0                             | 1                        | 1                           | 0 Hypothetical protein (1)                                     |                                                                                                                                                                                                                                                      |                                                                                                                                                                                                                                                                                                                                               |                               | C_unihii_00014_mRNA_8.1    | -                            |
| GF0033816 | 0                             | 1                        | 1                           | 0 Hypothetical protein (1)                                     |                                                                                                                                                                                                                                                      |                                                                                                                                                                                                                                                                                                                                               |                               | C_unihii_00014_mRNA_7.1    | -                            |
| GF0033815 | 0                             | 1                        | 1                           | 0 SPX domain-containing protein 2 (1)                          | cellular response to phosphate starvation [GO:0016036 biological_process] (1)                                                                                                                                                                        | SPX domain [IPRO04331] (1); SPX domain-containing protein [IPRO13142] (1)                                                                                                                                                                                                                                                                     |                               | C_unihii_00014_mRNA_59.1   | -                            |
| GF0033814 | 0                             | 1                        | 1                           | 0 Hypothetical protein (1)                                     |                                                                                                                                                                                                                                                      |                                                                                                                                                                                                                                                                                                                                               |                               | C_unihii_00014_mRNA_3.1    | -                            |
| GF0033813 | 0                             | 1                        | 1                           | 0 Hypothetical protein (1)                                     |                                                                                                                                                                                                                                                      |                                                                                                                                                                                                                                                                                                                                               |                               | C_unihii_00014_mRNA_119.1  | -                            |
| GF0033812 | 0                             | 1                        | 1                           | 0 Hypothetical protein (1)                                     |                                                                                                                                                                                                                                                      |                                                                                                                                                                                                                                                                                                                                               |                               | C_unihii_00014_mRNA_118.1  | -                            |
| GF0033811 | 0                             | 1                        | 1                           | 0 Hypothetical protein (1)                                     |                                                                                                                                                                                                                                                      |                                                                                                                                                                                                                                                                                                                                               |                               | C_unihii_00013_mRNA_97.1   | -                            |
| GF0033810 | 0                             | 1                        | 1                           | 0 Hypothetical protein (1)                                     |                                                                                                                                                                                                                                                      |                                                                                                                                                                                                                                                                                                                                               |                               | C_unihii_00013_mRNA_96.1   | -                            |
| GF0033809 | 0                             | 1                        | 1                           | 0 Hypothetical protein (1)                                     |                                                                                                                                                                                                                                                      |                                                                                                                                                                                                                                                                                                                                               |                               | C_unihii_00013_mRNA_93.1   | -                            |
| GF0033808 | 0                             | 1                        | 1                           | 0 Hypothetical protein (1)                                     |                                                                                                                                                                                                                                                      |                                                                                                                                                                                                                                                                                                                                               |                               | C_unihii_00013_mRNA_92.1   | -                            |
| GF0033807 | 0                             | 1                        | 1                           | 0 Hypothetical protein (1)                                     |                                                                                                                                                                                                                                                      |                                                                                                                                                                                                                                                                                                                                               |                               | C_unihii_00013_mRNA_91.1   | -                            |
| GF0033806 | 0                             | 1                        | 1                           | 0 Hypothetical protein (1)                                     |                                                                                                                                                                                                                                                      |                                                                                                                                                                                                                                                                                                                                               |                               | C_unihii_00013_mRNA_90.1   | -                            |
| GF0033805 | 0                             | 1                        | 1                           | 0 Hypothetical protein (1)                                     | protein phosphorylation [GO:0006468 biological_process] (1); protein kinase activity [GO:0004672 molecular_function] (1); ATP binding [GO:0005524 molecular_function] (1)                                                                            | Tyrosine-protein kinase, active site [IPRO0262] (1); Protein kinase, ATP binding site [IPRO17441] (1); Protein kinase-like domain [IPRO11009] (1); Protein kinase domain [IPRO00719] (1)                                                                                                                                                      |                               | C_unihii_00013_mRNA_86.1   | -                            |
| GF0033804 | 0                             | 1                        | 1                           | 0 LRR receptor-like kinase family protein (1)                  | protein binding [GO:0005515 molecular_function] (1); protein phosphorylation [GO:0006468 biological_process] (1); protein kinase activity [GO:0004672 molecular_function] (1); ATP binding [GO:0005524 molecular_function] (1)                       | Leucine-rich repeat, typical subtype [IPRO03591] (1); Leucine-rich repeat domain, L domain-like [IPRO12675] (1); Protein kinase-like domain [IPRO11009] (1); Protein kinase domain [IPRO00719] (1); Leucine-rich repeat [IPRO0161] (1); Protein kinase, ATP binding site [IPRO17441] (1); Tyrosine-protein kinase, active site [IPRO0262] (1) |                               | C_unihii_00013_mRNA_85.1   | -                            |
| GF0033803 | 0                             | 1                        | 1                           | 0 Hypothetical protein (1)                                     | serine-type peptidase activity [GO:0002316 molecular_function] (1); proteolysis [GO:0006508 biological_process] (1)                                                                                                                                  | Alpha/Beta hydrolase fold [IPRO29058] (1); Peptidase S28 [IPRO08758] (1)                                                                                                                                                                                                                                                                      |                               | C_unihii_00013_mRNA_84.1   | -                            |
| GF0033802 | 0                             | 1                        | 1                           | 0 Hypothetical protein (1)                                     |                                                                                                                                                                                                                                                      |                                                                                                                                                                                                                                                                                                                                               |                               | C_unihii_00013_mRNA_7.1    | -                            |
| GF0033801 | 0                             | 1                        | 1                           | 0 Hypothetical protein (1)                                     | DNA binding [GO:0003677 molecular_function] (1); transcription factor activity, sequence-specific DNA binding [GO:0003700 molecular_function] (1); regulation of transcription, DNA-templated [GO:0006355 biological_process] (1)                    | DNA-binding domain [IPRO16177] (1); AP2/ERF domain [IPRO01471] (1)                                                                                                                                                                                                                                                                            |                               | C_unihii_00013_mRNA_68.1   | -                            |
| GF0033800 | 0                             | 1                        | 1                           | 0 Hypothetical protein (1)                                     | DNA binding [GO:0003677 molecular_function] (1); transcription factor activity, sequence-specific DNA binding [GO:0003700 molecular_function] (1); regulation of transcription, DNA-templated [GO:0006355 biological_process] (1)                    | DNA-binding domain [IPRO16177] (1); AP2/ERF domain [IPRO01471] (1)                                                                                                                                                                                                                                                                            |                               | C_unihii_00013_mRNA_67.1   | -                            |
| GF0033799 | 0                             | 1                        | 1                           | 0 Hypothetical protein (1)                                     |                                                                                                                                                                                                                                                      |                                                                                                                                                                                                                                                                                                                                               |                               | C_unihii_00013_mRNA_65.1   | -                            |
| GF0033798 | 0                             | 1                        | 1                           | 0 Hypothetical protein (1)                                     |                                                                                                                                                                                                                                                      |                                                                                                                                                                                                                                                                                                                                               |                               | C_unihii_00013_mRNA_49.1   | -                            |
| GF0033797 | 0                             | 1                        | 1                           | 0 Hypothetical protein (1)                                     | DNA binding [GO:0003677 molecular_function] (1)                                                                                                                                                                                                      | Zinc finger, BED-type [IPRO03656] (1)                                                                                                                                                                                                                                                                                                         |                               | C_unihii_00013_mRNA_25.1   | -                            |
| GF0033796 | 0                             | 1                        | 1                           | 0 Hypothetical protein (1)                                     |                                                                                                                                                                                                                                                      |                                                                                                                                                                                                                                                                                                                                               |                               | C_unihii_00013_mRNA_22.1   | -                            |
| GF0033795 | 0                             | 1                        | 1                           | 0 Hypothetical protein (1)                                     |                                                                                                                                                                                                                                                      |                                                                                                                                                                                                                                                                                                                                               |                               | C_unihii_00013_mRNA_21.1   | -                            |
| GF0033794 | 0                             | 1                        | 1                           | 0 Hypothetical protein (1)                                     |                                                                                                                                                                                                                                                      |                                                                                                                                                                                                                                                                                                                                               |                               | C_unihii_00013_mRNA_2.1    | -                            |
| GF0033793 | 0                             | 1                        | 1                           | 0 Hypothetical protein (1)                                     | ADP binding [GO:0043531 molecular_function] (1)                                                                                                                                                                                                      | P-loop containing nucleoside triphosphate hydrolase [IPRO27417] (1); Powdery mildew resistance protein, RPW8 domain [IPRO08001] (1); Shk-ARF [IPRO02182] (1); Leucine-rich repeat domain, L domain-like [IPRO12675] (1)                                                                                                                       |                               | C_unihii_00013_mRNA_115.1  | -                            |
| GF0033792 | 0                             | 1                        | 1                           | 0 CST complex subunit CTC1 (1)                                 | telomere maintenance [GO:0000723 biological_process] (1)                                                                                                                                                                                             | CST complex subunit CTC1, plant [IPRO28262] (1)                                                                                                                                                                                                                                                                                               |                               | C_unihii_00013_mRNA_112.1  | -                            |
| GF0033791 | 0                             | 1                        | 1                           | 0 Myb-like HTH transcriptional regulator-like protein (1)      | DNA binding [GO:0003677 molecular_function] (1)                                                                                                                                                                                                      | Myb domain [IPRO17301] (1); Myb domain, plant [IPRO06447] (1); SANT/Myb domain [IPRO01065] (1); Helix-turn-helix [IPRO09057] (1)                                                                                                                                                                                                              |                               | C_unihii_00012_mRNA_84.1   | -                            |
| GF0033790 | 0                             | 1                        | 1                           | 0 FasciIn domain-containing protein, putative isoform 1 (1)    |                                                                                                                                                                                                                                                      | FAST domain [IPRO00782] (1)                                                                                                                                                                                                                                                                                                                   |                               | C_unihii_00012_mRNA_7.1    | -                            |
| GF0033789 | 0                             | 1                        | 1                           | 0 Hypothetical protein (1)                                     |                                                                                                                                                                                                                                                      |                                                                                                                                                                                                                                                                                                                                               |                               | C_unihii_00012_mRNA_64.1   | -                            |
| GF0033788 | 0                             | 1                        | 1                           | 0 Hypothetical protein (1)                                     |                                                                                                                                                                                                                                                      | Leucine-rich repeat-containing N-terminal, plant-type [IPRO13210] (1); Leucine-rich repeat domain, L domain-like [IPRO12675] (1)                                                                                                                                                                                                              |                               | C_unihii_00012_mRNA_31.1   | -                            |
| GF0033787 | 0                             | 1                        | 1                           | 0 Hypothetical protein (1)                                     |                                                                                                                                                                                                                                                      |                                                                                                                                                                                                                                                                                                                                               |                               | C_unihii_00012_mRNA_123.1  | -                            |
| GF0033786 | 0                             | 1                        | 1                           | 0 Hypothetical protein (1)                                     |                                                                                                                                                                                                                                                      |                                                                                                                                                                                                                                                                                                                                               |                               | C_unihii_00012_mRNA_113.1  | -                            |
| GF0033785 | 0                             | 1                        | 1                           | 0 Hypothetical protein (1)                                     |                                                                                                                                                                                                                                                      |                                                                                                                                                                                                                                                                                                                                               |                               | C_unihii_00011_mRNA_98.1   | -                            |
| GF0033784 | 0                             | 1                        | 1                           | 0 Hypothetical protein (1)                                     |                                                                                                                                                                                                                                                      | Viral movement protein [IPRO28919] (1); Gag-polyprotein of LTR copia-type [IPRO29472] (1); Plectonin homology domain [IPRO1849] (1)                                                                                                                                                                                                           |                               | C_unihii_00011_mRNA_97.1   | -                            |
| GF0033783 | 0                             | 1                        | 1                           | 0 Hypothetical protein (1)                                     |                                                                                                                                                                                                                                                      |                                                                                                                                                                                                                                                                                                                                               |                               | C_unihii_00011_mRNA_95.1   | -                            |
| GF0033782 | 0                             | 1                        | 1                           | 0 Hypothetical protein (1)                                     |                                                                                                                                                                                                                                                      |                                                                                                                                                                                                                                                                                                                                               |                               | C_unihii_00011_mRNA_94.1   | -                            |
| GF0033781 | 0                             | 1                        | 1                           | 0 Hypothetical protein (1)                                     |                                                                                                                                                                                                                                                      |                                                                                                                                                                                                                                                                                                                                               |                               | C_unihii_00011_mRNA_89.1   | -                            |
| GF0033780 | 0                             | 1                        | 1                           | 0 Hypothetical protein (1)                                     |                                                                                                                                                                                                                                                      |                                                                                                                                                                                                                                                                                                                                               |                               | C_unihii_00011_mRNA_88.1   | -                            |
| GF0033779 | 0                             | 1                        | 1                           | 0 Hypothetical protein (1)                                     |                                                                                                                                                                                                                                                      |                                                                                                                                                                                                                                                                                                                                               |                               | C_unihii_00011_mRNA_87.1   | -                            |
| GF0033778 | 0                             | 1                        | 1                           | 0 Hypothetical protein (1)                                     | zinc ion binding [GO:0008270 molecular_function] (1); nucleic acid binding [GO:0003676 molecular_function] (1)                                                                                                                                       | Zinc finger, CCHC-type [IPRO01878] (1)                                                                                                                                                                                                                                                                                                        |                               | C_unihii_00011_mRNA_81.1   | -                            |
| GF0033777 | 0                             | 1                        | 1                           | 0 Hypothetical protein (1)                                     | zinc ion binding [GO:0008270 molecular_function] (1); nucleic acid binding [GO:0003676 molecular_function] (1)                                                                                                                                       | Zinc finger, CCHC-type [IPRO01878] (1)                                                                                                                                                                                                                                                                                                        |                               | C_unihii_00011_mRNA_79.1   | -                            |
| GF0033776 | 0                             | 1                        | 1                           | 0 Hypothetical protein (1)                                     |                                                                                                                                                                                                                                                      |                                                                                                                                                                                                                                                                                                                                               |                               | C_unihii_00011_mRNA_73.1   | -                            |
| GF0033775 | 0                             | 1                        | 1                           | 0 Hypothetical protein (1)                                     |                                                                                                                                                                                                                                                      |                                                                                                                                                                                                                                                                                                                                               |                               | C_unihii_00011_mRNA_70.1   | -                            |
| GF0033774 | 0                             | 1                        | 1                           | 0 Hypothetical protein (1)                                     |                                                                                                                                                                                                                                                      | Domain of unknown function DUF4283 [IPRO25558] (1)                                                                                                                                                                                                                                                                                            |                               | C_unihii_00011_mRNA_67.1   | -                            |
| GF0033773 | 0                             | 1                        | 1                           | 0 Hypothetical protein (1)                                     |                                                                                                                                                                                                                                                      |                                                                                                                                                                                                                                                                                                                                               |                               | C_unihii_00011_mRNA_65.1   | -                            |
| GF0033772 | 0                             | 1                        | 1                           | 0 Monosaccharide transport protein (1)                         |                                                                                                                                                                                                                                                      | Ribonuclease H-like domain [IPRO12337] (1)                                                                                                                                                                                                                                                                                                    |                               | C_unihii_00011_mRNA_63.1   | -                            |
| GF0033771 | 0                             | 1                        | 1                           | 0 Hypothetical protein (1)                                     | nucleic acid binding [GO:0003676 molecular_function] (1)                                                                                                                                                                                             | Tabula3/2, GTPase domain [IPRO03088] (1); Cell division protein Fuz2, C-terminal [IPRO24277] (1); Tabula3/2, C-terminal [IPRO08280] (1); Nonamapin (TMSF) [IPRO04240] (1); Tabula3/2, 2-azide anchoring domain [IPRO18316] (1); Cell division protein Fuz2 [IPRO00158] (1)                                                                    |                               | C_unihii_00011_mRNA_47.1   | -                            |
| GF0033770 | 0                             | 1                        | 1                           | 0 Hypothetical protein (1)                                     | GTP binding [GO:0005525 molecular_function] (1); integral component of membrane [GO:0016061 cellular_component] (1); GTPase activity [GO:0003924 molecular_function] (1)                                                                             | Tabula3/2, GTPase domain [IPRO03088] (1); Cell division protein Fuz2, C-terminal [IPRO24277] (1); Tabula3/2, C-terminal [IPRO08280] (1); Nonamapin (TMSF) [IPRO04240] (1); Tabula3/2, 2-azide anchoring domain [IPRO18316] (1); Cell division protein Fuz2 [IPRO00158] (1)                                                                    |                               | C_unihii_00011_mRNA_5.1    | -                            |
| GF0033769 | 0                             | 1                        | 1                           | 0 Hypothetical protein (1)                                     |                                                                                                                                                                                                                                                      |                                                                                                                                                                                                                                                                                                                                               |                               | C_unihii_00011_mRNA_46.1   | -                            |
| GF0033768 | 0                             | 1                        | 1                           | 0 Hypothetical protein (1)                                     |                                                                                                                                                                                                                                                      |                                                                                                                                                                                                                                                                                                                                               |                               | C_unihii_00011_mRNA_46.1   | -                            |
| GF0033767 | 0                             | 1                        | 1                           | 0 Progesterone 5-beta-reductase (1)                            |                                                                                                                                                                                                                                                      | NAD(P)-binding domain [IPRO16040] (1)                                                                                                                                                                                                                                                                                                         |                               | C_unihii_00011_mRNA_43.1   | -                            |
| GF0033766 | 0                             | 1                        | 1                           | 0 Hypothetical protein (1)                                     |                                                                                                                                                                                                                                                      |                                                                                                                                                                                                                                                                                                                                               |                               | C_unihii_00011_mRNA_41.1   | -                            |
| GF0033765 | 0                             | 1                        | 1                           | 0 Hypothetical protein (1)                                     |                                                                                                                                                                                                                                                      |                                                                                                                                                                                                                                                                                                                                               |                               | C_unihii_00011_mRNA_39.1   | -                            |
| GF0033764 | 0                             | 1                        | 1                           | 0 Hypothetical protein (1)                                     |                                                                                                                                                                                                                                                      |                                                                                                                                                                                                                                                                                                                                               |                               | C_unihii_00011_mRNA_38.1   | -                            |
| GF0033763 | 0                             | 1                        | 1                           | 0 Hypothetical protein (1)                                     |                                                                                                                                                                                                                                                      |                                                                                                                                                                                                                                                                                                                                               |                               | C_unihii_00011_mRNA_36.1   | -                            |
| GF0033762 | 0                             | 1                        | 1                           | 0 Hypothetical protein (1)                                     |                                                                                                                                                                                                                                                      |                                                                                                                                                                                                                                                                                                                                               |                               | C_unihii_00011_mRNA_35.1   | -                            |
| GF0033761 | 0                             | 1                        | 1                           | 0 Hypothetical protein (1)                                     |                                                                                                                                                                                                                                                      |                                                                                                                                                                                                                                                                                                                                               |                               | C_unihii_00011_mRNA_32.1   | -                            |
| GF0033760 | 0                             | 1                        | 1                           | 0 Hypothetical protein (1)                                     |                                                                                                                                                                                                                                                      |                                                                                                                                                                                                                                                                                                                                               |                               | C_unihii_00011_mRNA_2.1    | -                            |
| GF0033759 | 0                             | 1                        | 1                           | 0 Hypothetical protein (1)                                     |                                                                                                                                                                                                                                                      | Transposase, MuDR, plant [IPRO04332] (1); MULE transposase domain [IPRO18289] (1)                                                                                                                                                                                                                                                             |                               | C_unihii_00011_mRNA_18.1   | -                            |
| GF0033758 | 0                             | 1                        | 1                           | 0 Hypothetical protein (1)                                     |                                                                                                                                                                                                                                                      | S-adenosyl-L-methionine-dependent methyltransferase [IPRO29063] (1)                                                                                                                                                                                                                                                                           |                               | C_unihii_00011_mRNA_13.1   | -                            |
| GF0033757 | 0                             | 1                        | 1                           | 0 Hypothetical protein (1)                                     |                                                                                                                                                                                                                                                      |                                                                                                                                                                                                                                                                                                                                               |                               | C_unihii_00010_mRNA_59.1   | -                            |
| GF0033756 | 0                             | 1                        | 1                           | 0 Hypothetical protein (1)                                     | integral component of membrane [GO:0016021 cellular_component] (1); protein insertion into membrane [GO:0015205 biological_process] (1)                                                                                                              | Membrane insertase OXA1/ALB3/YakC [IPRO01708] (1)                                                                                                                                                                                                                                                                                             |                               | C_unihii_00010_mRNA_3.1    | -                            |
| GF0033755 | 0                             | 1                        | 1                           | 0 Hypothetical protein (1)                                     |                                                                                                                                                                                                                                                      |                                                                                                                                                                                                                                                                                                                                               |                               | C_unihii_00010_mRNA_133.1  | -                            |
| GF0033754 | 0                             | 1                        | 1                           | 0 Hypothetical protein (1)                                     |                                                                                                                                                                                                                                                      |                                                                                                                                                                                                                                                                                                                                               |                               | C_unihii_00010_mRNA_1.1    | -                            |
| GF0033753 | 0                             | 1                        | 1                           | 0 Hypothetical protein (1)                                     |                                                                                                                                                                                                                                                      |                                                                                                                                                                                                                                                                                                                                               |                               | C_unihii_00009_mRNA_97.1   | -                            |
| GF0033752 | 0                             | 1                        | 1                           | 0 Hypothetical protein (1)                                     |                                                                                                                                                                                                                                                      |                                                                                                                                                                                                                                                                                                                                               |                               | C_unihii_00009_mRNA_93.1   | -                            |
| GF0033751 | 0                             | 1                        | 1                           | 0 Hypothetical protein (1)                                     |                                                                                                                                                                                                                                                      |                                                                                                                                                                                                                                                                                                                                               |                               | C_unihii_00009_mRNA_64.1   | -                            |
| GF0033750 | 0                             | 1                        | 1                           | 0 Hypothetical protein (1)                                     | zinc ion binding [GO:0008270 molecular_function] (1)                                                                                                                                                                                                 | Zinc finger, SWIM-type [IPRO07527] (1); MULE transposase domain [IPRO18289] (1); Zinc finger, DMZ-type [IPRO06064] (1)                                                                                                                                                                                                                        |                               | C_unihii_00009_mRNA_26.1   | -                            |
| GF0033749 | 0                             | 1                        | 1                           | 0 Hypothetical protein (1)                                     |                                                                                                                                                                                                                                                      |                                                                                                                                                                                                                                                                                                                                               |                               | C_unihii_00009_mRNA_24.1   | -                            |
| GF0033748 | 0                             | 1                        | 1                           | 0 Hypothetical protein (1)                                     |                                                                                                                                                                                                                                                      |                                                                                                                                                                                                                                                                                                                                               |                               | C_unihii_00009_mRNA_23.1   | -                            |
| GF0033747 | 0                             | 1                        | 1                           | 0 Pattern formation protein, putative (1)                      |                                                                                                                                                                                                                                                      |                                                                                                                                                                                                                                                                                                                                               |                               | C_unihii_00009_mRNA_16.1   | -                            |
| GF0033746 | 0                             | 1                        | 1                           | 0 Hypothetical protein (1)                                     | protein binding [GO:0005515 molecular_function] (1); regulation of transcription, DNA-templated [GO:0006355 biological_process] (1); nucleoside [GO:0006254 cellular_component] (1)                                                                  | P01 domain [IPRO00770] (1); A1UX1AA protein [IPRO0311] (1)                                                                                                                                                                                                                                                                                    |                               | C_unihii_00009_mRNA_146.1  | -                            |
| GF0033745 | 0                             | 1                        | 1                           | 0 Heavy metal transport/detoxification superfamily protein (1) | metal ion transport [GO:0030001 biological_process] (1); metal ion binding [GO:0046072 molecular_function] (1)                                                                                                                                       | Heavy metal-associated domain, HMA [IPRO06121] (1)                                                                                                                                                                                                                                                                                            |                               | C_unihii_00009_mRNA_144.1  | -                            |

| ID        | Num. in <i>C. crottensteini</i> | Num. in <i>C. caudata</i> | Num. in <i>P. putida</i> | Note                                                                                   | GO                                                                                                                                                                                                                                                                                                                                                                           | InterPro                                                                                                                                                                                                                                                                                                                                                                | Members in <i>C. crottensteini</i> | Members in <i>C. caudata</i> | Members in <i>P. putida</i> |
|-----------|---------------------------------|---------------------------|--------------------------|----------------------------------------------------------------------------------------|------------------------------------------------------------------------------------------------------------------------------------------------------------------------------------------------------------------------------------------------------------------------------------------------------------------------------------------------------------------------------|-------------------------------------------------------------------------------------------------------------------------------------------------------------------------------------------------------------------------------------------------------------------------------------------------------------------------------------------------------------------------|------------------------------------|------------------------------|-----------------------------|
| GF0033744 | 0                               | 1                         | 0                        | Cytoschrome P450 83B1 (1)                                                              | oxidation-reduction process [GO:005514 biological process] (1); cytochrome activity, acting on paired donors, with incorporation or reduction of molecular oxygen [GO:004765 molecular function] (1); iron ion binding [GO:005556 molecular function] (1); heme binding [GO:002037 molecular function] (1)                                                                   | Cytochrome P450, E-class, group 1 [IPR02401] (1); Cytochrome P450, conserved site [IPR01972] (1); Cytochrome P450 [IPR01178] (1)                                                                                                                                                                                                                                        |                                    | C_umshii_00009_mRNA_140.1    |                             |
| GF0033742 | 0                               | 1                         | 0                        | Hypothetical protein (1)                                                               |                                                                                                                                                                                                                                                                                                                                                                              |                                                                                                                                                                                                                                                                                                                                                                         |                                    | C_umshii_00009_mRNA_134.1    |                             |
| GF0033742 | 0                               | 1                         | 0                        | Hypothetical protein (1)                                                               |                                                                                                                                                                                                                                                                                                                                                                              |                                                                                                                                                                                                                                                                                                                                                                         |                                    | C_umshii_00009_mRNA_132.1    |                             |
| GF0033741 | 0                               | 1                         | 0                        | Hypothetical protein (1)                                                               | microtubule-based movement [GO:000718 biological process] (1); microtubule motor activity [GO:0003777 molecular function] (1)                                                                                                                                                                                                                                                | Kinesin-like protein [IPR027446] (1); NPK1-activating kinesin-like protein, C-terminal [IPR021881] (1)                                                                                                                                                                                                                                                                  |                                    | C_umshii_00009_mRNA_127.1    |                             |
| GF0033740 | 0                               | 1                         | 0                        | Hypothetical protein (1)                                                               | transport [GO:000610 biological process] (1); membrane [GO:0016020 cellular_component] (1); transporter activity [GO:0005215 molecular function] (1)                                                                                                                                                                                                                         | Proton-dependent oligopeptide transporter family [IPR000109] (1)                                                                                                                                                                                                                                                                                                        |                                    | C_umshii_00009_mRNA_112.1    |                             |
| GF0033739 | 0                               | 1                         | 0                        | Hypothetical protein (1)                                                               |                                                                                                                                                                                                                                                                                                                                                                              |                                                                                                                                                                                                                                                                                                                                                                         |                                    | C_umshii_00009_mRNA_101.1    |                             |
| GF0033738 | 0                               | 1                         | 0                        | Hypothetical protein (1)                                                               | extracellular region [GO:0005576 cellular_component] (1)                                                                                                                                                                                                                                                                                                                     | Expansion/loop [IPR007118] (1); Expansion/loop allergen, DFBI domain [IPR007112] (1); RbpA-like double-psi beta-barrel domain [IPR009099] (1)                                                                                                                                                                                                                           |                                    | C_umshii_00009_mRNA_1.1      |                             |
| GF0033737 | 0                               | 1                         | 0                        | Hypothetical protein (1)                                                               |                                                                                                                                                                                                                                                                                                                                                                              |                                                                                                                                                                                                                                                                                                                                                                         |                                    | C_umshii_00008_mRNA_71.1     |                             |
| GF0033736 | 0                               | 1                         | 0                        | Hypothetical protein (1)                                                               | protein dimerization activity [GO:004698 molecular function] (1); nucleic acid binding [GO:0003676 molecular function] (1)                                                                                                                                                                                                                                                   | HAT, C-terminal dimerization domain [IPR00896] (1); Domain of unknown function DU4247 [IPR025398] (1); Ribonuclease H-like domain [IPR012337] (1)                                                                                                                                                                                                                       |                                    | C_umshii_00008_mRNA_58.1     |                             |
| GF0033735 | 0                               | 1                         | 0                        | Hypothetical protein (1)                                                               | DNA binding [GO:0003677 molecular function] (1)                                                                                                                                                                                                                                                                                                                              | Zinc finger, BED-type [IPR03656] (1)                                                                                                                                                                                                                                                                                                                                    |                                    | C_umshii_00008_mRNA_40.1     |                             |
| GF0033734 | 0                               | 1                         | 0                        | Verrucilium wilt resistance-like protein (1)                                           | protein binding [GO:0005515 molecular function] (1)                                                                                                                                                                                                                                                                                                                          | Leucine-rich repeat, typical subtype [IPR003591] (1); Leucine-rich repeat domain, I domain-like [IPR02675] (1); Leucine-rich repeat-containing N-terminal, plant-type [IPR013210] (1); Leucine-rich repeat [IPR01611] (1)                                                                                                                                               |                                    | C_umshii_00008_mRNA_37.1     |                             |
| GF0033733 | 0                               | 1                         | 0                        | Hypothetical protein (1)                                                               |                                                                                                                                                                                                                                                                                                                                                                              |                                                                                                                                                                                                                                                                                                                                                                         |                                    | C_umshii_00008_mRNA_16.1     |                             |
| GF0033732 | 0                               | 1                         | 0                        | Receptor like protein 33 (1)                                                           |                                                                                                                                                                                                                                                                                                                                                                              | Leucine-rich repeat domain, I domain-like [IPR02675] (1)                                                                                                                                                                                                                                                                                                                |                                    | C_umshii_00008_mRNA_149.1    |                             |
| GF0033731 | 0                               | 1                         | 0                        | LRR receptor-like kinase (1)                                                           | protein binding [GO:0005515 molecular function] (1)                                                                                                                                                                                                                                                                                                                          | Leucine-rich repeat domain, I domain-like [IPR02675] (1); Leucine-rich repeat, typical subtype [IPR003591] (1)                                                                                                                                                                                                                                                          |                                    | C_umshii_00008_mRNA_148.1    |                             |
| GF0033730 | 0                               | 1                         | 0                        | Hypothetical protein (1)                                                               | transporter activity [GO:0005215 molecular function] (1); purine nucleobase transport [GO:0006863 biological process] (1); transmembrane transport [GO:0055085 biological process] (1); transport [GO:000610 biological process] (1); membrane [GO:0016020 cellular_component] (1); purine nucleobase transmembrane transporter activity [GO:0005345 molecular function] (1) | Xanthine/uracil/vitamin C permease [IPR006043] (1); ArgA purine transporter [IPR029940] (1)                                                                                                                                                                                                                                                                             |                                    | C_umshii_00008_mRNA_125.1    |                             |
| GF0033729 | 0                               | 1                         | 0                        | Hypothetical protein (1)                                                               | transmembrane transport [GO:0055085 biological process] (1); transporter activity [GO:0005215 molecular function] (1); purine nucleobase transport [GO:0006863 biological process] (1); transport [GO:000610 biological process] (1); membrane [GO:0016020 cellular_component] (1); purine nucleobase transmembrane transporter activity [GO:0005345 molecular function] (1) | Xanthine/uracil/vitamin C permease [IPR006043] (1); ArgA purine transporter [IPR029940] (1)                                                                                                                                                                                                                                                                             |                                    | C_umshii_00008_mRNA_124.1    |                             |
| GF0033728 | 0                               | 1                         | 0                        | Hypothetical protein (1)                                                               | transmembrane transport [GO:0055085 biological process] (1); transporter activity [GO:0005215 molecular function] (1); purine nucleobase transport [GO:0006863 biological process] (1); transport [GO:000610 biological process] (1); membrane [GO:0016020 cellular_component] (1); purine nucleobase transmembrane transporter activity [GO:0005345 molecular function] (1) | Xanthine/uracil/vitamin C permease [IPR006043] (1); ArgA purine transporter [IPR029940] (1)                                                                                                                                                                                                                                                                             |                                    | C_umshii_00008_mRNA_124.1    |                             |
| GF0033727 | 0                               | 1                         | 0                        | Hypothetical protein (1)                                                               | pyridoxal phosphate binding [GO:000170 molecular function] (1); transaminase activity [GO:0004843 molecular function] (1); catalytic activity [GO:0003824 molecular function] (1)                                                                                                                                                                                            | Pyridoxal phosphate-dependent transaminase, major region, subdomain 1 [IPR015421] (1); Pyridoxal phosphate-dependent transaminase [IPR015424] (1); Amino-transferase class-II [IPR00814] (1); Pyridoxal phosphate-dependent transaminase, major region, subdomain 2 [IPR015422] (1)                                                                                     |                                    | C_umshii_00008_mRNA_113.1    |                             |
| GF0033726 | 0                               | 1                         | 0                        | Putative non-LTR retroelement reverse transcriptase (1)                                | nucleic acid binding [GO:0003676 molecular function] (1); RNA-DNA hybrid ribonuclease activity [GO:0004523 molecular function] (1)                                                                                                                                                                                                                                           | Ribonuclease H-like domain [IPR012337] (1); Reverse transcriptase zinc-binding domain [IPR026901] (1); Ribonuclease H domain [IPR02156] (1)                                                                                                                                                                                                                             |                                    | C_umshii_00008_mRNA_108.1    |                             |
| GF0033725 | 0                               | 1                         | 0                        | Hypothetical protein (1)                                                               |                                                                                                                                                                                                                                                                                                                                                                              |                                                                                                                                                                                                                                                                                                                                                                         |                                    | C_umshii_00007_mRNA_60.1     |                             |
| GF0033724 | 0                               | 1                         | 0                        | Hypothetical protein (1)                                                               |                                                                                                                                                                                                                                                                                                                                                                              |                                                                                                                                                                                                                                                                                                                                                                         |                                    | C_umshii_00007_mRNA_23.1     |                             |
| GF0033723 | 0                               | 1                         | 0                        | Hypothetical protein (1)                                                               |                                                                                                                                                                                                                                                                                                                                                                              |                                                                                                                                                                                                                                                                                                                                                                         |                                    | C_umshii_00007_mRNA_17.1     |                             |
| GF0033722 | 0                               | 1                         | 0                        | Hypothetical protein (1)                                                               |                                                                                                                                                                                                                                                                                                                                                                              |                                                                                                                                                                                                                                                                                                                                                                         |                                    | C_umshii_00007_mRNA_169.1    |                             |
| GF0033721 | 0                               | 1                         | 0                        | Hypothetical protein (1)                                                               |                                                                                                                                                                                                                                                                                                                                                                              |                                                                                                                                                                                                                                                                                                                                                                         |                                    | C_umshii_00007_mRNA_142.1    |                             |
| GF0033720 | 0                               | 1                         | 0                        | S-adenosylmethionine synthase 2 (1)                                                    | S-adenosylmethionine biosynthetic process [GO:0006556 biological process] (1); ATP binding [GO:0005524 molecular function] (1); methionine adenosyltransferase activity [GO:0004474 molecular function] (1)                                                                                                                                                                  | S-adenosylmethionine synthetase, N-terminal [IPR022628] (1); S-adenosylmethionine synthetase, conserved site [IPR022631] (1); S-adenosylmethionine synthetase superfamily [IPR022636] (1); S-adenosylmethionine synthetase [IPR01231] (1); S-adenosylmethionine synthetase, C-terminal [IPR022630] (1); S-adenosylmethionine synthetase, central domain [IPR022629] (1) |                                    | C_umshii_00007_mRNA_140.1    |                             |
| GF0033719 | 0                               | 1                         | 0                        | Bidirectional sugar transporter SWEET0b                                                | integral component of membrane [GO:0016021 cellular_component] (1)                                                                                                                                                                                                                                                                                                           | Autophagy protein Atg8/ubiquitin-like [IPR04241] (1); Ubiquitin-related domain [IPR029071] (1); SWEET sugar transporter [IPR04316] (1); Major facilitator superfamily domain [IPR020846] (1)                                                                                                                                                                            |                                    | C_umshii_00007_mRNA_138.1    |                             |
| GF0033718 | 0                               | 1                         | 0                        | Hypothetical protein (1)                                                               |                                                                                                                                                                                                                                                                                                                                                                              |                                                                                                                                                                                                                                                                                                                                                                         |                                    | C_umshii_00007_mRNA_137.1    |                             |
| GF0033717 | 0                               | 1                         | 0                        | Hypothetical protein (1)                                                               | nucleic acid binding [GO:0003676 molecular function] (1)                                                                                                                                                                                                                                                                                                                     | Ribonuclease H-like domain [IPR012337] (1)                                                                                                                                                                                                                                                                                                                              |                                    | C_umshii_00007_mRNA_134.1    |                             |
| GF0033716 | 0                               | 1                         | 0                        | Hypothetical protein (1)                                                               |                                                                                                                                                                                                                                                                                                                                                                              |                                                                                                                                                                                                                                                                                                                                                                         |                                    | C_umshii_00007_mRNA_124.1    |                             |
| GF0033715 | 0                               | 1                         | 0                        | Putative vacuolar sorting-associated protein 13A (1)                                   |                                                                                                                                                                                                                                                                                                                                                                              | Vacuolar protein sorting-associated protein 13, N-terminal domain [IPR026854] (1); Vacuolar protein sorting-associated protein 13 [IPR026847] (1); Vacuolar protein sorting-associated protein 13, second N-terminal domain [IPR031646] (1)                                                                                                                             |                                    | C_umshii_00007_mRNA_118.1    |                             |
| GF0033714 | 0                               | 1                         | 0                        | Hypothetical protein (1)                                                               |                                                                                                                                                                                                                                                                                                                                                                              |                                                                                                                                                                                                                                                                                                                                                                         |                                    | C_umshii_00007_mRNA_1.1      |                             |
| GF0033713 | 0                               | 1                         | 0                        | Hypothetical protein (1)                                                               |                                                                                                                                                                                                                                                                                                                                                                              |                                                                                                                                                                                                                                                                                                                                                                         |                                    | C_umshii_00006_mRNA_9.1      |                             |
| GF0033712 | 0                               | 1                         | 0                        | Hypothetical protein (1)                                                               |                                                                                                                                                                                                                                                                                                                                                                              | PGS domain [IPR026961] (1)                                                                                                                                                                                                                                                                                                                                              |                                    | C_umshii_00006_mRNA_85.1     |                             |
| GF0033711 | 0                               | 1                         | 0                        | Exosome complex exonuclease RRP46 like (1)                                             |                                                                                                                                                                                                                                                                                                                                                                              | Ribosomal protein S5 domain 2-type 64d [IPR026568] (1); Exonuclease, phosphotyrosine domain 1 [IPR004247] (1)                                                                                                                                                                                                                                                           |                                    | C_umshii_00006_mRNA_82.1     |                             |
| GF0033710 | 0                               | 1                         | 0                        | H <sup>+</sup> -transporting two-sector ATPase, alpha/beta subunit, central region (1) |                                                                                                                                                                                                                                                                                                                                                                              | Reverse transcriptase zinc-binding domain [IPR026960] (1)                                                                                                                                                                                                                                                                                                               |                                    | C_umshii_00006_mRNA_76.1     |                             |
| GF0033709 | 0                               | 1                         | 0                        | Hypothetical protein (1)                                                               |                                                                                                                                                                                                                                                                                                                                                                              |                                                                                                                                                                                                                                                                                                                                                                         |                                    | C_umshii_00006_mRNA_75.1     |                             |
| GF0033708 | 0                               | 1                         | 0                        | Hypothetical protein (1)                                                               |                                                                                                                                                                                                                                                                                                                                                                              |                                                                                                                                                                                                                                                                                                                                                                         |                                    | C_umshii_00006_mRNA_6.1      |                             |
| GF0033707 | 0                               | 1                         | 0                        | Hypothetical protein (1)                                                               |                                                                                                                                                                                                                                                                                                                                                                              |                                                                                                                                                                                                                                                                                                                                                                         |                                    | C_umshii_00006_mRNA_54.1     |                             |
| GF0033706 | 0                               | 1                         | 0                        | Hypothetical protein (1)                                                               |                                                                                                                                                                                                                                                                                                                                                                              | RNA-binding protein Lupus La [IPR00630] (1); Winged helix-turn-helix DNA-binding domain [IPR011991] (1)                                                                                                                                                                                                                                                                 |                                    | C_umshii_00006_mRNA_43.1     |                             |
| GF0033705 | 0                               | 1                         | 0                        | Hypothetical protein (1)                                                               | DNA replication-independent nucleosome assembly [GO:0006136 biological process] (1)                                                                                                                                                                                                                                                                                          | Histone transcription regulator 3/CABIN1 [IPR033053] (1)                                                                                                                                                                                                                                                                                                                |                                    | C_umshii_00006_mRNA_42.1     |                             |
| GF0033704 | 0                               | 1                         | 0                        | Monosaccharide transport protein (1)                                                   |                                                                                                                                                                                                                                                                                                                                                                              |                                                                                                                                                                                                                                                                                                                                                                         |                                    | C_umshii_00006_mRNA_31.1     |                             |
| GF0033703 | 0                               | 1                         | 0                        | Hypothetical protein (1)                                                               |                                                                                                                                                                                                                                                                                                                                                                              |                                                                                                                                                                                                                                                                                                                                                                         |                                    | C_umshii_00006_mRNA_133.1    |                             |
| GF0033702 | 0                               | 1                         | 0                        | Hypothetical protein (1)                                                               |                                                                                                                                                                                                                                                                                                                                                                              | Domain of unknown function DUF4409 [IPR025521] (1); Domain of unknown function DU4239 [IPR004314] (1)                                                                                                                                                                                                                                                                   |                                    | C_umshii_00006_mRNA_13.1     |                             |
| GF0033701 | 0                               | 1                         | 0                        | Hypothetical protein (1)                                                               |                                                                                                                                                                                                                                                                                                                                                                              | Facilin family [IPR027705] (1)                                                                                                                                                                                                                                                                                                                                          |                                    | C_umshii_00005_mRNA_93.1     |                             |
| GF0033700 | 0                               | 1                         | 0                        | Aspartate aminotransferase B (1)                                                       |                                                                                                                                                                                                                                                                                                                                                                              |                                                                                                                                                                                                                                                                                                                                                                         |                                    | C_umshii_00005_mRNA_83.1     |                             |
| GF0033699 | 0                               | 1                         | 0                        | Hypothetical protein (1)                                                               |                                                                                                                                                                                                                                                                                                                                                                              |                                                                                                                                                                                                                                                                                                                                                                         |                                    | C_umshii_00005_mRNA_79.1     |                             |
| GF0033698 | 0                               | 1                         | 0                        | Homogeninase phytyltransferase (1)                                                     | intracellular [GO:0005622 cellular_component] (1); integral component of membrane [GO:0016021 cellular_component] (1); translocation [GO:0006412 biological process] (1); structural constituent of ribosome [GO:0003735 molecular function] (1); methyltransferase activity [GO:0004659 molecular function] (1); ribosome [GO:0005440 cellular_component] (1)               | Ribosomal protein L39e, conserved site [IPR020083] (1); Ribosomal protein L39e [IPR00077] (1); Uba, prolyltransferase family [IPR00571] (1); Ribosomal protein L39e domain [IPR023626] (1)                                                                                                                                                                              |                                    | C_umshii_00005_mRNA_70.1     |                             |
| GF0033697 | 0                               | 1                         | 0                        | Hypothetical protein (1)                                                               |                                                                                                                                                                                                                                                                                                                                                                              |                                                                                                                                                                                                                                                                                                                                                                         |                                    | C_umshii_00005_mRNA_63.1     |                             |
| GF0033696 | 0                               | 1                         | 0                        | Hypothetical protein (1)                                                               |                                                                                                                                                                                                                                                                                                                                                                              |                                                                                                                                                                                                                                                                                                                                                                         |                                    | C_umshii_00005_mRNA_61.1     |                             |
| GF0033695 | 0                               | 1                         | 0                        | Hypothetical protein (1)                                                               |                                                                                                                                                                                                                                                                                                                                                                              |                                                                                                                                                                                                                                                                                                                                                                         |                                    | C_umshii_00005_mRNA_59.1     |                             |
| GF0033694 | 0                               | 1                         | 0                        | Integral membrane transporter family protein (1)                                       | transport [GO:000610 biological process] (1); integral component of membrane [GO:0016021 cellular_component] (1)                                                                                                                                                                                                                                                             | Enhancer of rudimentary [IPR000781] (1); Major facilitator superfamily domain [IPR020846] (1); Folate-hydropterin transporter [IPR004424] (1)                                                                                                                                                                                                                           |                                    | C_umshii_00005_mRNA_23.1     |                             |
| GF0033693 | 0                               | 1                         | 0                        | NB-ARC domain disease resistance protein (1)                                           | ADP binding [GO:0042531 molecular function] (1)                                                                                                                                                                                                                                                                                                                              | P-loop containing nucleoside triphosphate hydrolase [IPR027417] (1); NB-ARC [IPR02192] (1)                                                                                                                                                                                                                                                                              |                                    | C_umshii_00005_mRNA_142.1    |                             |

| ID       | Num. in C. crottenstei | Num. in C. auris | Num. in P. putida | Name                                                      | GO                                                                                                                                                                                                                                                                                                                                                                                                                                                                                                                                                                                                                                                                                                                                                                                                                                                                                                                                                                                                                                             | InterPro                                                                                                                                                                                                                                                                                                                                                                                                                                                                                                                                                                                                                                                                                                                                                                                                                                                                                                                    | Members in C. crottenstei | Members in C. auris     | Members in P. putida |
|----------|------------------------|------------------|-------------------|-----------------------------------------------------------|------------------------------------------------------------------------------------------------------------------------------------------------------------------------------------------------------------------------------------------------------------------------------------------------------------------------------------------------------------------------------------------------------------------------------------------------------------------------------------------------------------------------------------------------------------------------------------------------------------------------------------------------------------------------------------------------------------------------------------------------------------------------------------------------------------------------------------------------------------------------------------------------------------------------------------------------------------------------------------------------------------------------------------------------|-----------------------------------------------------------------------------------------------------------------------------------------------------------------------------------------------------------------------------------------------------------------------------------------------------------------------------------------------------------------------------------------------------------------------------------------------------------------------------------------------------------------------------------------------------------------------------------------------------------------------------------------------------------------------------------------------------------------------------------------------------------------------------------------------------------------------------------------------------------------------------------------------------------------------------|---------------------------|-------------------------|----------------------|
| GF003692 | 0                      | 1                | 0                 | Hypothetical protein (1)                                  |                                                                                                                                                                                                                                                                                                                                                                                                                                                                                                                                                                                                                                                                                                                                                                                                                                                                                                                                                                                                                                                | Leucine-rich repeat domain, L. domain-like [IPR025075] (1)                                                                                                                                                                                                                                                                                                                                                                                                                                                                                                                                                                                                                                                                                                                                                                                                                                                                  | -                         | C_ushii_0005_mRNA_140.1 | -                    |
| GF003691 | 0                      | 1                | 0                 | Hypothetical protein (1)                                  |                                                                                                                                                                                                                                                                                                                                                                                                                                                                                                                                                                                                                                                                                                                                                                                                                                                                                                                                                                                                                                                | Leucine-rich repeat domain, L. domain-like [IPR025075] (1)                                                                                                                                                                                                                                                                                                                                                                                                                                                                                                                                                                                                                                                                                                                                                                                                                                                                  | -                         | C_ushii_0005_mRNA_138.1 | -                    |
| GF003690 | 0                      | 1                | 0                 | TMV resistance protein N (1)                              | protein binding [GO:000515] molecular_function (1); signal transduction [GO:0007165] biological_process (1)                                                                                                                                                                                                                                                                                                                                                                                                                                                                                                                                                                                                                                                                                                                                                                                                                                                                                                                                    | Toll/interleukin-1 receptor homology (TIR) domain [IPR001571] (1)                                                                                                                                                                                                                                                                                                                                                                                                                                                                                                                                                                                                                                                                                                                                                                                                                                                           | -                         | C_ushii_0005_mRNA_137.1 | -                    |
| GF003689 | 0                      | 1                | 0                 | Hypothetical protein (1)                                  |                                                                                                                                                                                                                                                                                                                                                                                                                                                                                                                                                                                                                                                                                                                                                                                                                                                                                                                                                                                                                                                |                                                                                                                                                                                                                                                                                                                                                                                                                                                                                                                                                                                                                                                                                                                                                                                                                                                                                                                             | -                         | C_ushii_0005_mRNA_136.1 | -                    |
| GF003688 | 0                      | 1                | 0                 | Hypothetical protein (1)                                  |                                                                                                                                                                                                                                                                                                                                                                                                                                                                                                                                                                                                                                                                                                                                                                                                                                                                                                                                                                                                                                                |                                                                                                                                                                                                                                                                                                                                                                                                                                                                                                                                                                                                                                                                                                                                                                                                                                                                                                                             | -                         | C_ushii_0005_mRNA_135.1 | -                    |
| GF003687 | 0                      | 1                | 0                 | Hypothetical protein (1)                                  |                                                                                                                                                                                                                                                                                                                                                                                                                                                                                                                                                                                                                                                                                                                                                                                                                                                                                                                                                                                                                                                |                                                                                                                                                                                                                                                                                                                                                                                                                                                                                                                                                                                                                                                                                                                                                                                                                                                                                                                             | -                         | C_ushii_0005_mRNA_133.1 | -                    |
| GF003686 | 0                      | 1                | 0                 | F-box/RN1-like superfamily protein isoform 2 (1)          | protein binding [GO:000515] molecular_function (1)                                                                                                                                                                                                                                                                                                                                                                                                                                                                                                                                                                                                                                                                                                                                                                                                                                                                                                                                                                                             | Leucine-rich repeat [IPR016111] (1); Leucine-rich repeat domain, L. domain-like [IPR025075] (1); Leucine-rich repeat, cysteine-containing subtype [IPR006531] (1)                                                                                                                                                                                                                                                                                                                                                                                                                                                                                                                                                                                                                                                                                                                                                           | -                         | C_ushii_0005_mRNA_132.1 | -                    |
| GF003685 | 0                      | 1                | 0                 | Hypothetical protein (1)                                  |                                                                                                                                                                                                                                                                                                                                                                                                                                                                                                                                                                                                                                                                                                                                                                                                                                                                                                                                                                                                                                                | Domain of unknown function DUF4050 [IPR025124] (1)                                                                                                                                                                                                                                                                                                                                                                                                                                                                                                                                                                                                                                                                                                                                                                                                                                                                          | -                         | C_ushii_0005_mRNA_128.1 | -                    |
| GF003684 | 0                      | 1                | 0                 | Hypothetical protein (1)                                  |                                                                                                                                                                                                                                                                                                                                                                                                                                                                                                                                                                                                                                                                                                                                                                                                                                                                                                                                                                                                                                                |                                                                                                                                                                                                                                                                                                                                                                                                                                                                                                                                                                                                                                                                                                                                                                                                                                                                                                                             | -                         | C_ushii_0005_mRNA_1.1   | -                    |
| GF003683 | 0                      | 1                | 0                 | Nucleotide-diphospho-sugar transferase family protein (1) |                                                                                                                                                                                                                                                                                                                                                                                                                                                                                                                                                                                                                                                                                                                                                                                                                                                                                                                                                                                                                                                | Nucleotide-diphospho-sugar transferase [IPR005069] (1)                                                                                                                                                                                                                                                                                                                                                                                                                                                                                                                                                                                                                                                                                                                                                                                                                                                                      | -                         | C_ushii_0004_mRNA_98.1  | -                    |
| GF003682 | 0                      | 1                | 0                 | Hypothetical protein (1)                                  |                                                                                                                                                                                                                                                                                                                                                                                                                                                                                                                                                                                                                                                                                                                                                                                                                                                                                                                                                                                                                                                | Conserved hypothetical protein                                                                                                                                                                                                                                                                                                                                                                                                                                                                                                                                                                                                                                                                                                                                                                                                                                                                                              | -                         | C_ushii_0004_mRNA_75.1  | -                    |
| GF003681 | 0                      | 1                | 0                 | Hypothetical protein (1)                                  |                                                                                                                                                                                                                                                                                                                                                                                                                                                                                                                                                                                                                                                                                                                                                                                                                                                                                                                                                                                                                                                | CHP1589, plant [IPR006476] (1)                                                                                                                                                                                                                                                                                                                                                                                                                                                                                                                                                                                                                                                                                                                                                                                                                                                                                              | -                         | C_ushii_0004_mRNA_73.1  | -                    |
| GF003680 | 0                      | 1                | 0                 | Hypothetical protein (1)                                  |                                                                                                                                                                                                                                                                                                                                                                                                                                                                                                                                                                                                                                                                                                                                                                                                                                                                                                                                                                                                                                                |                                                                                                                                                                                                                                                                                                                                                                                                                                                                                                                                                                                                                                                                                                                                                                                                                                                                                                                             | -                         | C_ushii_0004_mRNA_168.1 | -                    |
| GF003679 | 0                      | 1                | 0                 | Hypothetical protein (1)                                  |                                                                                                                                                                                                                                                                                                                                                                                                                                                                                                                                                                                                                                                                                                                                                                                                                                                                                                                                                                                                                                                |                                                                                                                                                                                                                                                                                                                                                                                                                                                                                                                                                                                                                                                                                                                                                                                                                                                                                                                             | -                         | C_ushii_0004_mRNA_164.1 | -                    |
| GF003678 | 0                      | 1                | 0                 | Mossouharide transport protein (1)                        |                                                                                                                                                                                                                                                                                                                                                                                                                                                                                                                                                                                                                                                                                                                                                                                                                                                                                                                                                                                                                                                |                                                                                                                                                                                                                                                                                                                                                                                                                                                                                                                                                                                                                                                                                                                                                                                                                                                                                                                             | -                         | C_ushii_0004_mRNA_158.1 | -                    |
| GF003677 | 0                      | 1                | 0                 | Hypothetical protein (1)                                  |                                                                                                                                                                                                                                                                                                                                                                                                                                                                                                                                                                                                                                                                                                                                                                                                                                                                                                                                                                                                                                                |                                                                                                                                                                                                                                                                                                                                                                                                                                                                                                                                                                                                                                                                                                                                                                                                                                                                                                                             | -                         | C_ushii_0004_mRNA_103.1 | -                    |
| GF003676 | 0                      | 1                | 0                 | Hypothetical protein (1)                                  |                                                                                                                                                                                                                                                                                                                                                                                                                                                                                                                                                                                                                                                                                                                                                                                                                                                                                                                                                                                                                                                |                                                                                                                                                                                                                                                                                                                                                                                                                                                                                                                                                                                                                                                                                                                                                                                                                                                                                                                             | -                         | C_ushii_0004_mRNA_10.1  | -                    |
| GF003675 | 0                      | 1                | 0                 | Hypothetical protein (1)                                  | DNA binding [GO:0003677] molecular_function (1)                                                                                                                                                                                                                                                                                                                                                                                                                                                                                                                                                                                                                                                                                                                                                                                                                                                                                                                                                                                                | SANT/Myb domain [IPR010951] (1); Helicase domain [IPR001071] (1); Myb-like domain [IPR017877] (1)                                                                                                                                                                                                                                                                                                                                                                                                                                                                                                                                                                                                                                                                                                                                                                                                                           | -                         | C_ushii_0003_mRNA_91.1  | -                    |
| GF003674 | 0                      | 1                | 0                 | Hypothetical protein (1)                                  |                                                                                                                                                                                                                                                                                                                                                                                                                                                                                                                                                                                                                                                                                                                                                                                                                                                                                                                                                                                                                                                |                                                                                                                                                                                                                                                                                                                                                                                                                                                                                                                                                                                                                                                                                                                                                                                                                                                                                                                             | -                         | C_ushii_0003_mRNA_86.1  | -                    |
| GF003673 | 0                      | 1                | 0                 | Hypothetical protein (1)                                  |                                                                                                                                                                                                                                                                                                                                                                                                                                                                                                                                                                                                                                                                                                                                                                                                                                                                                                                                                                                                                                                |                                                                                                                                                                                                                                                                                                                                                                                                                                                                                                                                                                                                                                                                                                                                                                                                                                                                                                                             | -                         | C_ushii_0003_mRNA_43.1  | -                    |
| GF003672 | 0                      | 1                | 0                 | Hypothetical protein (1)                                  |                                                                                                                                                                                                                                                                                                                                                                                                                                                                                                                                                                                                                                                                                                                                                                                                                                                                                                                                                                                                                                                |                                                                                                                                                                                                                                                                                                                                                                                                                                                                                                                                                                                                                                                                                                                                                                                                                                                                                                                             | -                         | C_ushii_0003_mRNA_25.1  | -                    |
| GF003671 | 0                      | 1                | 0                 | Hypothetical protein (1)                                  |                                                                                                                                                                                                                                                                                                                                                                                                                                                                                                                                                                                                                                                                                                                                                                                                                                                                                                                                                                                                                                                |                                                                                                                                                                                                                                                                                                                                                                                                                                                                                                                                                                                                                                                                                                                                                                                                                                                                                                                             | -                         | C_ushii_0003_mRNA_171.1 | -                    |
| GF003670 | 0                      | 1                | 0                 | Hypothetical protein (1)                                  |                                                                                                                                                                                                                                                                                                                                                                                                                                                                                                                                                                                                                                                                                                                                                                                                                                                                                                                                                                                                                                                |                                                                                                                                                                                                                                                                                                                                                                                                                                                                                                                                                                                                                                                                                                                                                                                                                                                                                                                             | -                         | C_ushii_0003_mRNA_168.1 | -                    |
| GF003669 | 0                      | 1                | 0                 | Hypothetical protein (1)                                  |                                                                                                                                                                                                                                                                                                                                                                                                                                                                                                                                                                                                                                                                                                                                                                                                                                                                                                                                                                                                                                                |                                                                                                                                                                                                                                                                                                                                                                                                                                                                                                                                                                                                                                                                                                                                                                                                                                                                                                                             | -                         | C_ushii_0003_mRNA_167.1 | -                    |
| GF003668 | 0                      | 1                | 0                 | Hypothetical protein (1)                                  |                                                                                                                                                                                                                                                                                                                                                                                                                                                                                                                                                                                                                                                                                                                                                                                                                                                                                                                                                                                                                                                |                                                                                                                                                                                                                                                                                                                                                                                                                                                                                                                                                                                                                                                                                                                                                                                                                                                                                                                             | -                         | C_ushii_0003_mRNA_165.1 | -                    |
| GF003667 | 0                      | 1                | 0                 | Nyctigenin galactosyltransferase KATAMARI1 (1)            |                                                                                                                                                                                                                                                                                                                                                                                                                                                                                                                                                                                                                                                                                                                                                                                                                                                                                                                                                                                                                                                | Exonotin-like [IPR04263] (1)                                                                                                                                                                                                                                                                                                                                                                                                                                                                                                                                                                                                                                                                                                                                                                                                                                                                                                | -                         | C_ushii_0003_mRNA_14.1  | -                    |
| GF003666 | 0                      | 1                | 0                 | Hypothetical protein (1)                                  |                                                                                                                                                                                                                                                                                                                                                                                                                                                                                                                                                                                                                                                                                                                                                                                                                                                                                                                                                                                                                                                |                                                                                                                                                                                                                                                                                                                                                                                                                                                                                                                                                                                                                                                                                                                                                                                                                                                                                                                             | -                         | C_ushii_0003_mRNA_130.1 | -                    |
| GF003665 | 0                      | 1                | 0                 | T-complex protein 1 subunit gamma (1)                     | ATP binding [GO:0005524] molecular_function (1); protein folding [GO:0006457] biological_process (1); unfolded protein binding [GO:0051082] molecular_function (1)                                                                                                                                                                                                                                                                                                                                                                                                                                                                                                                                                                                                                                                                                                                                                                                                                                                                             | Chaperone tallies complex polypeptide 1 (TCP-1) [IPR017999] (1); Chaperon TCP-1, conserved site [IPR002194] (1); GroEL-like equatorial domain [IPR027413] (1); GroEL-like apical domain [IPR027409] (1); Chaperon Cys60/TCP-1 family [IPR024231] (1); TCP-1 like chaperon intermediate domain [IPR027410] (1); T-complex protein 1, gamma subunit [IPR012719] (1)                                                                                                                                                                                                                                                                                                                                                                                                                                                                                                                                                           | -                         | C_ushii_0003_mRNA_117.2 | -                    |
| GF003664 | 0                      | 1                | 0                 | Hypothetical protein (1)                                  |                                                                                                                                                                                                                                                                                                                                                                                                                                                                                                                                                                                                                                                                                                                                                                                                                                                                                                                                                                                                                                                |                                                                                                                                                                                                                                                                                                                                                                                                                                                                                                                                                                                                                                                                                                                                                                                                                                                                                                                             | -                         | C_ushii_0003_mRNA_103.1 | -                    |
| GF003663 | 0                      | 1                | 0                 | Vigain (1)                                                | cysteine-type peptidase activity [GO:0008234] molecular_function (1); proteolysis [GO:0006050] biological_process (1)                                                                                                                                                                                                                                                                                                                                                                                                                                                                                                                                                                                                                                                                                                                                                                                                                                                                                                                          | Cysteine peptidase, asparagine active site [IPR025661] (1); Peptidase C1A, papain C-terminal [IPR006668] (1); Cathepsin propeptide inhibitor domain (D5) [IPR013201] (1); Peptidase C1A [IPR013128] (1); Cysteine peptidase, histidine active site [IPR025660] (1); Cysteine peptidase, cysteine active site [IPR001691] (1)                                                                                                                                                                                                                                                                                                                                                                                                                                                                                                                                                                                                | -                         | C_ushii_0002_mRNA_85.1  | -                    |
| GF003662 | 0                      | 1                | 0                 | Hypothetical protein (1)                                  |                                                                                                                                                                                                                                                                                                                                                                                                                                                                                                                                                                                                                                                                                                                                                                                                                                                                                                                                                                                                                                                |                                                                                                                                                                                                                                                                                                                                                                                                                                                                                                                                                                                                                                                                                                                                                                                                                                                                                                                             | -                         | C_ushii_0002_mRNA_72.1  | -                    |
| GF003661 | 0                      | 1                | 0                 | Hypothetical protein (1)                                  |                                                                                                                                                                                                                                                                                                                                                                                                                                                                                                                                                                                                                                                                                                                                                                                                                                                                                                                                                                                                                                                |                                                                                                                                                                                                                                                                                                                                                                                                                                                                                                                                                                                                                                                                                                                                                                                                                                                                                                                             | -                         | C_ushii_0002_mRNA_51.1  | -                    |
| GF003660 | 0                      | 1                | 0                 | Hypothetical protein (1)                                  |                                                                                                                                                                                                                                                                                                                                                                                                                                                                                                                                                                                                                                                                                                                                                                                                                                                                                                                                                                                                                                                |                                                                                                                                                                                                                                                                                                                                                                                                                                                                                                                                                                                                                                                                                                                                                                                                                                                                                                                             | -                         | C_ushii_0002_mRNA_215.1 | -                    |
| GF003659 | 0                      | 1                | 0                 | Hypothetical protein (1)                                  |                                                                                                                                                                                                                                                                                                                                                                                                                                                                                                                                                                                                                                                                                                                                                                                                                                                                                                                                                                                                                                                |                                                                                                                                                                                                                                                                                                                                                                                                                                                                                                                                                                                                                                                                                                                                                                                                                                                                                                                             | -                         | C_ushii_0002_mRNA_2.1   | -                    |
| GF003658 | 0                      | 1                | 0                 | L-type lectin domain containing receptor kinase IV.2 (1)  | ATP binding [GO:0005524] molecular_function (1); protein kinase activity [GO:0004672] molecular_function (1); protein phosphorylation [GO:0006460] biological_process (1)                                                                                                                                                                                                                                                                                                                                                                                                                                                                                                                                                                                                                                                                                                                                                                                                                                                                      | Protein kinase, ATP binding site [IPR017411] (1); Protein kinase domain [IPR007191] (1); Protein kinase-like domain [IPR011099] (1); Concavamin A-like lectin chitinase domain [IPR013320] (1)                                                                                                                                                                                                                                                                                                                                                                                                                                                                                                                                                                                                                                                                                                                              | -                         | C_ushii_0002_mRNA_169.1 | -                    |
| GF003657 | 0                      | 1                | 0                 | Putative retrocrack polypolyprotein (1)                   | regulation of transcription, DNA-templated [GO:0006355] biological_process (1)                                                                                                                                                                                                                                                                                                                                                                                                                                                                                                                                                                                                                                                                                                                                                                                                                                                                                                                                                                 | TFIIIS/FAR1 family [IPR011052] (1); FAR1 DNA binding domain [IPR004430] (1)                                                                                                                                                                                                                                                                                                                                                                                                                                                                                                                                                                                                                                                                                                                                                                                                                                                 | -                         | C_ushii_0002_mRNA_164.1 | -                    |
| GF003656 | 0                      | 1                | 0                 | FAR1 DNA-binding domain protein (1)                       | DNA binding [GO:0003677] molecular_function (1); regulation of transcription, DNA-templated [GO:0006355] biological_process (1); transcription factor activity, sequence-specific DNA binding [GO:0003700] molecular_function (1)                                                                                                                                                                                                                                                                                                                                                                                                                                                                                                                                                                                                                                                                                                                                                                                                              | DNA-binding domain [IPR016177] (1); AP2-ERF domain [IPR014711] (1)                                                                                                                                                                                                                                                                                                                                                                                                                                                                                                                                                                                                                                                                                                                                                                                                                                                          | -                         | C_ushii_0002_mRNA_115.1 | -                    |
| GF003655 | 0                      | 1                | 0                 | ERF2 transcription factor (1)                             |                                                                                                                                                                                                                                                                                                                                                                                                                                                                                                                                                                                                                                                                                                                                                                                                                                                                                                                                                                                                                                                |                                                                                                                                                                                                                                                                                                                                                                                                                                                                                                                                                                                                                                                                                                                                                                                                                                                                                                                             | -                         | C_ushii_0001_mRNA_57.1  | -                    |
| GF003654 | 0                      | 1                | 0                 | Hypothetical protein (1)                                  | translation [GO:0006412] biological_process (1); structural constituent of ribosome [GO:0003735] molecular_function (1); ribosome [GO:000540] cellular_component (1)                                                                                                                                                                                                                                                                                                                                                                                                                                                                                                                                                                                                                                                                                                                                                                                                                                                                           | Ribosomal protein L10eL16 [IPR016180] (1)                                                                                                                                                                                                                                                                                                                                                                                                                                                                                                                                                                                                                                                                                                                                                                                                                                                                                   | -                         | C_ushii_0001_mRNA_395.1 | -                    |
| GF003653 | 0                      | 1                | 0                 | Hypothetical protein (1)                                  |                                                                                                                                                                                                                                                                                                                                                                                                                                                                                                                                                                                                                                                                                                                                                                                                                                                                                                                                                                                                                                                |                                                                                                                                                                                                                                                                                                                                                                                                                                                                                                                                                                                                                                                                                                                                                                                                                                                                                                                             | -                         | C_ushii_0001_mRNA_339.1 | -                    |
| GF003652 | 0                      | 1                | 0                 | Hypothetical protein (1)                                  |                                                                                                                                                                                                                                                                                                                                                                                                                                                                                                                                                                                                                                                                                                                                                                                                                                                                                                                                                                                                                                                |                                                                                                                                                                                                                                                                                                                                                                                                                                                                                                                                                                                                                                                                                                                                                                                                                                                                                                                             | -                         | C_ushii_0001_mRNA_332.1 | -                    |
| GF003651 | 0                      | 1                | 0                 | E3 ubiquitin ligase BIG BROTHER (1)                       | protein binding [GO:000515] molecular_function (1); zinc ion binding [GO:000370] molecular_function (1)                                                                                                                                                                                                                                                                                                                                                                                                                                                                                                                                                                                                                                                                                                                                                                                                                                                                                                                                        | Zinc finger, RING-FYVE/PHD-type [IPR012083] (1); Zinc finger, RING-type [IPR001841] (1)                                                                                                                                                                                                                                                                                                                                                                                                                                                                                                                                                                                                                                                                                                                                                                                                                                     | -                         | C_ushii_0001_mRNA_33.1  | -                    |
| GF003650 | 0                      | 1                | 0                 | Hypothetical protein (1)                                  |                                                                                                                                                                                                                                                                                                                                                                                                                                                                                                                                                                                                                                                                                                                                                                                                                                                                                                                                                                                                                                                | ATP-dependent RNA helicase Ski2, C-terminal [IPR012961] (1)                                                                                                                                                                                                                                                                                                                                                                                                                                                                                                                                                                                                                                                                                                                                                                                                                                                                 | -                         | C_ushii_0001_mRNA_309.1 | -                    |
| GF003649 | 0                      | 1                | 0                 | Hypothetical protein (1)                                  |                                                                                                                                                                                                                                                                                                                                                                                                                                                                                                                                                                                                                                                                                                                                                                                                                                                                                                                                                                                                                                                |                                                                                                                                                                                                                                                                                                                                                                                                                                                                                                                                                                                                                                                                                                                                                                                                                                                                                                                             | -                         | C_ushii_0001_mRNA_3.1   | -                    |
| GF003648 | 0                      | 1                | 0                 | Hypothetical protein (1)                                  |                                                                                                                                                                                                                                                                                                                                                                                                                                                                                                                                                                                                                                                                                                                                                                                                                                                                                                                                                                                                                                                |                                                                                                                                                                                                                                                                                                                                                                                                                                                                                                                                                                                                                                                                                                                                                                                                                                                                                                                             | -                         | C_ushii_0001_mRNA_29.1  | -                    |
| GF003647 | 0                      | 1                | 0                 | Germis-like protein subfamily 1 member 8 (1)              | nutrient reservoir activity [GO:0045735] molecular_function (1); manganese ion binding [GO:0030445] molecular_function (1)                                                                                                                                                                                                                                                                                                                                                                                                                                                                                                                                                                                                                                                                                                                                                                                                                                                                                                                     | Cupin 1 [IPR006045] (1); Germis, manganese binding site [IPR019780] (1); Raac-like ribic acid fold [IPR019710] (1); Raac-like cupin domain [IPR011051] (1)                                                                                                                                                                                                                                                                                                                                                                                                                                                                                                                                                                                                                                                                                                                                                                  | -                         | C_ushii_0001_mRNA_282.1 | -                    |
| GF003646 | 0                      | 1                | 0                 | Hypothetical protein (1)                                  | ATP binding [GO:0005524] molecular_function (1); nucleotide binding [GO:0000166] molecular_function (1); calcium-transporting ATPase activity [GO:0005588] molecular_function (1); metal ion binding [GO:0046872] molecular_function (1); membrane [GO:0016020] cellular_component (1); calcium ion transmembrane transport [GO:0070589] biological_process (1); calmodulin binding [GO:0005516] molecular_function (1); integral component of membrane [GO:0016021] cellular_component (1)                                                                                                                                                                                                                                                                                                                                                                                                                                                                                                                                                    | Calcium-transporting P-type ATPase, N-terminal autoinhibitory domain [IPR024750] (1); P-type ATPase, A domain [IPR005501] (1); KAD-like domain [IPR023214] (1); Calcium-transporting P-type ATPase, N-terminal [IPR004014] (1); P-type ATPase [IPR001971] (1); Cation-transporting P-type ATPase, C-terminal [IPR006068] (1); P-type ATPase, subfamily IIB [IPR006408] (1); P-type ATPase, cytoplasmic domain N [IPR023299] (1); P-type ATPase, transmembrane domain [IPR023298] (1)                                                                                                                                                                                                                                                                                                                                                                                                                                        | -                         | C_ushii_0001_mRNA_283.1 | -                    |
| GF003645 | 0                      | 1                | 0                 | Hypothetical protein (1)                                  | cytokinin metabolic process [GO:0009690] biological_process (1); oxidoreductase activity, acting on CH-OH group of donors [GO:0016164] molecular_function (1); carbohydrate metabolic process [GO:0005975] biological_process (1); catalytic activity [GO:0003672] molecular_function (1); cytokinin dehydrogenase activity [GO:0019139] molecular_function (1); glycerol-3-phosphate metabolic process [GO:0000072] biological_process (1); glycerol-3-phosphate dehydrogenase complex [GO:0009321] cellular_component (1); glycerol-3-phosphate dehydrogenase [NAD+]-activity [GO:0004361] molecular_function (1); glycerol-3-phosphate catabolic process [GO:0046168] biological_process (1); brain adenine dinucleotide binding [GO:0005660] molecular_function (1); oxidoreductase activity [GO:0016169] molecular_function (1); oxidation-reduction process [GO:0005514] biological_process (1); NAD binding [GO:0051287] molecular_function (1); oxidoreductase activity, acting on the CH-OH group [GO:0003779] molecular_function (1) | FAD-binding, type 2 [IPR016160] (1); Glycerol-3-phosphate dehydrogenase, NAD-dependent, N-terminal [IPR011128] (1); FAD-linked oxidase, N-terminal [IPR006994] (1); Glycerol-3-phosphate dehydrogenase, NAD-dependent [IPR001603] (1); Vanillyl-alcohol oxidase/cytokinin dehydrogenase C-terminal domain [IPR016170] (1); NAD(P)-binding domain [IPR016040] (1); CO dehydrogenase flavoprotein-like; FAD-binding, subdomain 2 [IPR016169] (1); Glycerol-3-phosphate dehydrogenase, NAD-dependent, C-terminal [IPR006109] (1); FAD-binding, type 2, subdomain 1 [IPR016167] (1); Oxygen oxidoreductase covalent FAD-binding site [IPR006093] (1); 6-phosphogluconate dehydrogenase C-terminal domain-like [IPR008927] (1); FAD-linked oxidase-like, C-terminal [IPR016164] (1); Cytokinin dehydrogenase 1; FAD cytokinin binding domain [IPR015451] (1); cytosolic phosphogluconate dehydrogenase, domain 2 [IPR013328] (1) | -                         | C_ushii_0001_mRNA_250.1 | -                    |
| GF003644 | 0                      | 1                | 0                 | Hypothetical protein (1)                                  |                                                                                                                                                                                                                                                                                                                                                                                                                                                                                                                                                                                                                                                                                                                                                                                                                                                                                                                                                                                                                                                | Protein Networked (NET), actin-binding (NAB) domain [IPR011684] (1)                                                                                                                                                                                                                                                                                                                                                                                                                                                                                                                                                                                                                                                                                                                                                                                                                                                         | -                         | C_ushii_0001_mRNA_243.1 | -                    |
| GF003643 | 0                      | 1                | 0                 | Hypothetical protein (1)                                  |                                                                                                                                                                                                                                                                                                                                                                                                                                                                                                                                                                                                                                                                                                                                                                                                                                                                                                                                                                                                                                                | Peptidoglycan binding-like [IPR002477] (1)                                                                                                                                                                                                                                                                                                                                                                                                                                                                                                                                                                                                                                                                                                                                                                                                                                                                                  | -                         | C_ushii_0001_mRNA_22.1  | -                    |
| GF003642 | 0                      | 1                | 0                 | Hypothetical protein (1)                                  |                                                                                                                                                                                                                                                                                                                                                                                                                                                                                                                                                                                                                                                                                                                                                                                                                                                                                                                                                                                                                                                |                                                                                                                                                                                                                                                                                                                                                                                                                                                                                                                                                                                                                                                                                                                                                                                                                                                                                                                             | -                         | C_ushii_0001_mRNA_214.1 | -                    |
| GF003641 | 0                      | 1                | 0                 | Hypothetical protein (1)                                  | metal ion binding [GO:0046872] molecular_function (1)                                                                                                                                                                                                                                                                                                                                                                                                                                                                                                                                                                                                                                                                                                                                                                                                                                                                                                                                                                                          | Zinc finger, C2H2 [IPR007087] (1)                                                                                                                                                                                                                                                                                                                                                                                                                                                                                                                                                                                                                                                                                                                                                                                                                                                                                           | -                         | C_ushii_0001_mRNA_18.1  | -                    |
| GF003640 | 0                      | 1                | 0                 | Hypothetical protein (1)                                  |                                                                                                                                                                                                                                                                                                                                                                                                                                                                                                                                                                                                                                                                                                                                                                                                                                                                                                                                                                                                                                                |                                                                                                                                                                                                                                                                                                                                                                                                                                                                                                                                                                                                                                                                                                                                                                                                                                                                                                                             | -                         | C_ushii_0001_mRNA_177.1 | -                    |
| GF003639 | 0                      | 1                | 0                 | Hypothetical protein (1)                                  |                                                                                                                                                                                                                                                                                                                                                                                                                                                                                                                                                                                                                                                                                                                                                                                                                                                                                                                                                                                                                                                | GDP-6-acetyl protein O-fucosyltransferase [IPR019378] (1)                                                                                                                                                                                                                                                                                                                                                                                                                                                                                                                                                                                                                                                                                                                                                                                                                                                                   | -                         | C_ushii_0001_mRNA_171.1 | -                    |
| GF003638 | 0                      | 1                | 0                 | Hypothetical protein (1)                                  |                                                                                                                                                                                                                                                                                                                                                                                                                                                                                                                                                                                                                                                                                                                                                                                                                                                                                                                                                                                                                                                |                                                                                                                                                                                                                                                                                                                                                                                                                                                                                                                                                                                                                                                                                                                                                                                                                                                                                                                             | -                         | C_ushii_0001_mRNA_169.1 | -                    |
| GF003637 | 0                      | 1                | 0                 | Hypothetical protein (1)                                  |                                                                                                                                                                                                                                                                                                                                                                                                                                                                                                                                                                                                                                                                                                                                                                                                                                                                                                                                                                                                                                                |                                                                                                                                                                                                                                                                                                                                                                                                                                                                                                                                                                                                                                                                                                                                                                                                                                                                                                                             | -                         | C_ushii_0001_mRNA_150.1 | -                    |
| GF003636 | 0                      | 1                | 0                 | Hypothetical protein (1)                                  |                                                                                                                                                                                                                                                                                                                                                                                                                                                                                                                                                                                                                                                                                                                                                                                                                                                                                                                                                                                                                                                |                                                                                                                                                                                                                                                                                                                                                                                                                                                                                                                                                                                                                                                                                                                                                                                                                                                                                                                             | -                         | C_ushii_0001_mRNA_147.1 | -                    |
| GF003635 | 0                      | 1                | 0                 | Hypothetical protein (1)                                  |                                                                                                                                                                                                                                                                                                                                                                                                                                                                                                                                                                                                                                                                                                                                                                                                                                                                                                                                                                                                                                                | Protein of unknown function DUF679 [IPR007770] (1)                                                                                                                                                                                                                                                                                                                                                                                                                                                                                                                                                                                                                                                                                                                                                                                                                                                                          | -                         | C_ushii_0001_mRNA_139.1 | -                    |
| GF003634 | 0                      | 1                | 0                 | Hypothetical protein (1)                                  |                                                                                                                                                                                                                                                                                                                                                                                                                                                                                                                                                                                                                                                                                                                                                                                                                                                                                                                                                                                                                                                |                                                                                                                                                                                                                                                                                                                                                                                                                                                                                                                                                                                                                                                                                                                                                                                                                                                                                                                             | -                         | C_ushii_0001_mRNA_126.1 | -                    |
| GF003633 | 0                      | 1                | 0                 | Hypothetical protein (1)                                  |                                                                                                                                                                                                                                                                                                                                                                                                                                                                                                                                                                                                                                                                                                                                                                                                                                                                                                                                                                                                                                                |                                                                                                                                                                                                                                                                                                                                                                                                                                                                                                                                                                                                                                                                                                                                                                                                                                                                                                                             | -                         | -                       | -                    |

| ID        | Num. in <i>C. crottensteini</i> | Num. in <i>C. caudata</i> | Num. in <i>P. trifidata</i> | Note                                               | GO                                                                                                                                                                     | InterPro                                                                                                                                                                                                                                                                                         | Members in <i>C. crottensteini</i> | Members in <i>C. caudata</i> | Members in <i>P. trifidata</i> |
|-----------|---------------------------------|---------------------------|-----------------------------|----------------------------------------------------|------------------------------------------------------------------------------------------------------------------------------------------------------------------------|--------------------------------------------------------------------------------------------------------------------------------------------------------------------------------------------------------------------------------------------------------------------------------------------------|------------------------------------|------------------------------|--------------------------------|
| GF0033632 | 0                               | 1                         | 0                           | Cullin 3B (1)                                      | ubiquitin-dependent protein catabolic process [GO:0006511 biological_process (1); ubiquitin protein ligase binding [GO:0031625 molecular_function (1)                  | Cullin homology [IPR016158] (1); Cullin, N-terminal [IPR01373] (1); Cullin repeat-like-containing domain [IPR015191] (1); Winged helix-turn-helix - DNA-binding domain [IPR011991] (1); Cullin protein, neddylation domain [IPR019559] (1)                                                       |                                    | C_umbur_00001_mRNA_117.1     | -                              |
| GF0033631 | 0                               | 1                         | 0                           | TSA: Wollemia nobilis transcribed RNA sequence (1) | ubiquitin protein ligase binding [GO:0031625 molecular_function (1); ubiquitin-dependent protein catabolic process [GO:0006511 biological_process (1)                  | Cullin repeat-like-containing domain [IPR015191] (1); Cullin, N-terminal [IPR01373] (1)                                                                                                                                                                                                          |                                    | C_umbur_00001_mRNA_116.1     | -                              |
| GF0033630 | 0                               | 1                         | 0                           | F-box/kech3-repeat protein SKIP11 (1)              | protein binding [GO:0005515 molecular_function (1)                                                                                                                     | Keck3 repeat type 1 [IPR066652] (1); Galactose oxidase, beta-propeller [IPR015916] (1)                                                                                                                                                                                                           |                                    | C_umbur_00001_mRNA_109.1     | -                              |
| GF0033629 | 0                               | 1                         | 0                           | Receptor-like protein kinase HSL1 (1)              | protein kinase activity [GO:0004672 molecular_function (1); protein phosphorylation [GO:0006468 biological_process (1); ATP binding [GO:0005524 molecular_function (1) | Concanamycin A-like lectin/glycanase domain [IPR013320] (1); Protein kinase-like domain [IPR011099] (1); Protein kinase domain [IPR006791] (1); Serine/threonine/dual specificity protein kinase, catalytic domain [IPR002290] (1); Serine/threonine-protein kinase, active site [IPR008271] (1) |                                    | C_umbur_00001_mRNA_1.1       | -                              |
